# Supplementary material
Source: PubMed Central journal article supplement (PMC11115621)
Supplement: 18_2010_437_MOESM1_ESM.pdf [file 18_2010_437_MOESM1_ESM.pdf]

| Figure Fsl |             |             | 10         | 20          | 30          | 40          | 50            | 60                   | 70          |             |            |
|------------|-------------|-------------|------------|-------------|-------------|-------------|---------------|----------------------|-------------|-------------|------------|
| Alias      | PDB         | ID%         | 1234567    | 8901234567  | 8901234567  | 89012345    | 678901234 567 | 890123456 7890-12345 | 6789012345  |             |            |
| 1          | hCyP18a     | 2CPL        | MVNPTVF    | FDIAVDGEPL  | GRVSFELFAD  | KVPKTAEN--  | -FRALSTGEK    | GFG-----             | -YKGS CFHRI | IPGF-MCQGG  | DFTRHNGTGG |
| 2          | hCyp18b     | (85)        | MVNSVVF    | FDITVDGKPL  | GRISIKLFAD  | KILKTAEN--  | -FRALSTGEK    | GFR-----             | -YKGS CFHRI | IPGF-MCQGG  | DFTRHNGTGD |
| 3          | hCyPB       | 1CYN (63)   | GPKVTVKVY  | FDLRIGDEDV  | GRVIFGLFGK  | TVPKTVDN--  | -FVALATGEK    | GFG-----             | -YKNSKFHRV  | IKDF-MIQGG  | DFTRGDGTGG |
| 4          | hCyP33      | 1ZCX (66)   | SNPQVY     | MDIKIGNKPA  | GRIQMLLRSD  | VVPMTAEN--  | -FRCLCTHEK    | GFG-----             | -FKGSSFHRI  | IPQF-MCQGG  | DFTNHNGTGG |
| 5          | hCyP358     | (65)        | LSKETNPVVF | FDVCADGEPL  | GRITMELFSN  | IVPRTAEN--  | -FRALCTGEK    | GFG-----             | -FKNSIFHRV  | IPDF-VCQGG  | DITKHDGTGG |
| 6          | hCyPD       | 2BIT (75)   | SGNPLVY    | LDVDANGKPL  | GRVVLELKAD  | VVPKTAEN--  | -FRALCTGEK    | GFG-----             | -YKGSTFHRV  | IPSF-MCQAG  | DFTNHNGTGG |
| 7          | hCyPC       | 2RMC (54)   | RGPSVTAKVF | FDVRIGDKDV  | GRIVIGLFGK  | VVPKTVEN--  | -FVALATGEK    | GYG-----             | -YKGSKFHRV  | IKDF-MIQGG  | DITTDGDTGG |
| 8          | hCyP40      | 2Z6W (61)   | PSNPSNPRVF | FDVDIGGERV  | GRIVLELFAD  | IVPRTAEN--  | -FRALCTGEK    | GIGHTTGKPL           | HFKGC PFHRI | IKKF-MIQGG  | DFSNQNGTGG |
| 9          | hCyP88      | 2GW2 (52)   | RPRCF      | FDIAINQPA   | GRVVLELFSD  | VCPKTCEN--  | -FRCLCTGEK    | GTGKSTQKPL           | HYKSLFHRV   | VKDF-MVQGG  | DFSENGRGG  |
| 10         | hCyP157     | 2HE9 (50)   | PQCH       | FDIEINREP   | GRIMFQLFSD  | ICPKTCEN--  | -FLCLCSGEK    | GLGKTTGKKL           | CYKGS TFHRV | VKNF-MIQGG  | DFSENGRGG  |
| 11         | hCyP19      | 1QOI (53)   | NSSPVNPVVF | FDVSIQGQEV  | GRMKIELFAD  | VVPKTAEN--  | -FRQFCTGEF    | RKD---GVPI           | GYKGS TFHRV | IKDF-MIQGG  | DFVNGDGTGV |
| 12         | hCyP18d     | 1XWN (38)   | PPDSWQPP-N | VYLETS---M  | GIIVLELYWK  | HAPKTCEN--  | -FAELARGY     | -----                | -YNGTKFHRI  | IKDF-MIQGG  | DPTG-TGRGG |
| 13         | hCyP18c     | (30)        | MS         | VTLHTD---V  | GDIKIEVFCE  | RTPKTCMES   | RCVPQAGVQW    | -----                | -RDLGSLQPP  | PPGFKQVFCL  | SLPR-TGRGG |
| 14         | hCyP18ci    | (38)        | MS         | VTLHTD---V  | GDIKIEVFCE  | RTPKTCEN--  | -FLALCASNY    | -----                | -YNGCIFHRN  | IKGF-MVQTG  | DPTG-TGRGG |
| 15         | hCyP58      | 1ZKC (37)   | GY         | VRLHTN---K  | GDLNLELHCD  | LTPKTCEN--  | -FIRLCKKHY    | -----                | -YDGTIFHRS  | IRNF-VIQGG  | DPTG-TGTGG |
| 16         | hCyP73      | 2A2N (40)   | AEGPKRVSDS | AIHHTS---M  | GDIHTKLFVP  | ECPKTVEN--  | -FCVHSRNGY    | -----                | -YNGHTFHRI  | IKGF-MIQTG  | DPTG-TGMGG |
| 17         | hCyP57      | (26)        | MA         | VLLETT---L  | GDVVIDLYTE  | ERPRACLN--  | -FLKLCKIKY    | -----                | -YNYCLIHNV  | QRDF-IIQTG  | DPTG-TGRGG |
| 18         | hCyP54      | (29)        | IQEPPTNGK  | VLLKTT---A  | GDIDIELWSK  | EAPKACRN--  | -FIQLCLEAY    | -----                | -YDNTIFHRV  | VPGF-IVQGG  | DPTG-TGSGG |
| 19         | hCyP35      | (43)        | KHDFVFLD   | ICIDSS--PI  | GRLIFELYCD  | VCPKTCEN--  | -FQVLC TGA    | GFSQ-RGIRL           | HYKNSIFHRI  | VQNG-WIQGG  | DIVYGKGDNG |
|            |             |             |            |             |             |             |               |                      |             |             |            |
|            | 80          |             | 90         | 100         | 110         | 120         | 130           | 140                  | 150         | 160         |            |
|            | 6789012345  | 6-----7     | 8901234567 | 8901234567  | 8901234567  | 8-90123456  | 7890123456    | 7890123456           | 789-0-1234  | 5678901234  | 5          |
| 1          | KSIYGEKFD   | E-----N     | FILKHTGPGI | LSMANAGPNT  | NGSQFFICTA  | K-TEWLDGKH  | VVFGKVKEGM    | NIVEAMERFG           | SRN-G-KTSK  | KITIADCGQL  | E*         |
| 2          | KSIYGEKFD   | E-----N     | LIRKHTGSGI | LSMANAGPNT  | NGSQFFICAA  | K-TEWLDGKH  | VAFGKVKERV    | NIVEAMEHFG           | YRN-S-KTSK  | KITIADCGQF  | *          |
| 3          | KSIYGERFPD  | E-----N     | FKLKHYGPGW | VSMANAGKDT  | NGSQFFITTV  | K-TAWLDGKH  | VVFGKVLEGM    | EVVRKVESTK           | TDSRD-KPLK  | DVIIADCGKI  | EVEKPFAlA  |
| 4          | QSIYGKKFD   | E-----N     | FILKHTGPGL | LSMANS GPNT | NGSQFFLTCD  | K-TDWLDGKH  | VVFGEVTEGL    | DVLRQIEAOG           | SKD-G-KPKQ  | KVIIADCGEY  | V          |
| 5          | KSIYGDKFED  | E-----N     | FDVKHTGPGL | LSMANQGQNT  | NNSQFFVITLK | K-AEHLDFKH  | VVFGFVKDGM    | DTVKKIESFG           | SPK-G-SVCR  | RITITECGQI  | *          |
| 6          | VSIYGS RFPD | E-----N     | F TLKHVGPV | LSMANAGPNT  | NGSQFFICTI  | K-TDWLDGKH  | VVFGHVKEGM    | DVVKKIESFG           | SKS-G-RTSK  | KIVITDCGQL  | S          |
| 7          | ESIYGETFPD  | E-----N     | FKLKHYGIGW | VSMANAGPDT  | NGSQFFITLT  | K-PTWLDGKH  | VVFGKVIDGM    | TVVHSIELQA           | TDGHD-RPLT  | NCSIINSGKI  | DVKTPFVVE  |
| 8          | ESIYGEKFD   | E-----N     | FHYKHDREGL | LSMANAGRNT  | NGSQFFITTV  | P-TPHLDGKH  | VVFGQVIKGI    | GVARILENVE           | VKG-E-KPAK  | LCVIAECGEL  | KEGDDGGI   |
| 9          | ESIYGGFFED  | E-----S     | FAVKHNKEFL | LSMANRGKDT  | NGSQFFITTK  | P-TPHLDGHH  | VVFGQVISGQ    | EVVREIENQK           | TDAAS-KPFA  | EVRILSCGEL  | IPKSKVK    |
| 10         | ASIYGGYFKD  | E-----N     | FILKHDRAFL | LSMANRGKHT  | NGSQFFITTK  | P-APHLDG VH | VVFGLVISGF    | EVIEQIENLK           | TDAAS-RPYA  | DVRVIDCGVL  | ATKSIKDV   |
| 11         | ASIYRGP FAD | E-----N     | FKLRHSAPGL | LSMANS GPST | NGCQFFITCS  | K-CDWLDGKH  | VVFGKIIDGL    | LVMRKIENVP           | TGPNN-KPKL  | PVVISQC GEM |            |
| 12         | NSIYGKQFED  | EL-----H    | PDLKFTGAGI | LAMANAGPDT  | NGSQFFVTLA  | P-TQWLDGKH  | TIFGRVCQGI    | GMVNRVGMVE           | TN-SQDRPVD  | DVKI IKAYPS | G          |
| 13         | NSIWGKKFED  | EY-----S    | EYLKHNVRGV | VSMANN GPNT | NGSQFFITYG  | K-QPHLDMKY  | TVFGKVIDGL    | ETLDELEKLP           | VNEKTYRPLN  | DVHIKDITIH  | ANPFAQ     |
| 14         | ESIWGKKFED  | EY-----S    | EYLKHNVRGV | VSMANN GPNT | NGSQFFITYG  | K-QPHLDMKY  | TVFGKVIDGL    | ETLDELEKLP           | VNEKTYRPLN  | DVHIKDITIH  | ANPFAQ     |
| 15         | ESYWGKPFKD  | EF-----R    | PNLSHTGRG- | ISMANS GPNS | NRSQFFITFR  | S-CAYLDK KH | TIFGRVVGGF    | DVLTAMENVE           | SDPKTDRPKE  | EIRIDATTVF  | VDPYEEADA  |
| 16         | ESIWGGEFED  | EF-----H    | STLRHDRPYT | LSMANAGSNT  | NGSQFFITVV  | P-TPWLDNKH  | TVFGRVTKGM    | EVVQRISNVK           | VNPKTDPYE   | DVSIINITVK  |            |
| 17         | -SIFGQLYGD  | QASFFEA EKV | PRIKHKKGT  | VSMVNGSDQ   | HGSQFLITTG  | ENLDYLDGVH  | TVFGEVTEGM    | DI IKKINETF          | VDK-DFVPYQ  | DIRINHTVIL  | DDP        |
| 18         | ESIYGAPFKD  | EF-----H    | SRLRFNRRGL | VAMANAGSHD  | NGSQFFFITLG | R-ADELNNKH  | TIFGKVTGDT    | VYNMLRLSEV           | DID-DDERPH  | NPHKIKSCEV  | LFN        |
| 19         | ESIYGPTFED  | EN-----F    | SVPHNKRGV- | LGMANKGRHS  | NGSQFYITLQ  | A-TPYLDRKF  | VAFGQLIEGT    | EVLKQLELVP           | TQN-ERPIHM  | CRITDSGDPY  | A*         |

Multiple sequence alignment of the human CLDs (MSA19). The MSA was structured into twenty blocks consisting of 10-AA residues. The PDB code is shown in the third column. In parentheses are shown the sequence similarity scores (IDs) (expressed in percentage) between the archetypal hCyPA and the functional AAs were indicated in bold face. PPIL6 (culin) was omitted since it has a very weak sequence similarity with the CLD of hCyPA (ID=13%).
