# Supplementary material
Source: PubMed Central journal article supplement (PMC11115621)
Supplement: 18_2010_437_MOESM2_ESM.pdf [file 18_2010_437_MOESM2_ESM.pdf]

CLUSTAL 2.0.9 multiple sequence alignment

```
CSHUA -----
NP_839944 -----
NP_115861 -----
NP_570981 -----
NP_057143 -----
CSHUB -----
S66681 -----
A57545 -----
A41581 -----
A54204 -----
S64705 -----
D38552 -----
NP_624311 -----
G2708309 -----
A45981 -----
J40763 -----
A47328 -----
KP_531396 -----
KP_525294 -----
KP_523512 -----
KP_507866 -----
KP_517783 -----
KP_517773 -----
KP_526904 -----
KP_516556 -----KLLREKGNNKPWPMPMLAALVAVTAIVLYVPG
KP_526001 MSYVVFQEHSCSSEAHGFGYSCVSAQHKTTEKTQTRSTTVLCHLVAKSEMALKAQKIENR
KP_516021 -----
KP_515886 -----
KP_525218 -----
KP_507684 -----MONGPKIVAVRNGN
KP_524688 -----
KP_513346 -----
KP_524598 -----
KP_515004 -----
KP_523437 -----
KP_520485 -----MPIWDLVVSVHFLAVHAD-
KP_519076 -----
KP_527705 -----
KP_527529 -----QLGSPAPARRPEGTAGNRGRRRRDDAKGVAPRVTRGVD
KP_518678 -----HNKRGVLMANKGR-
CSMSA -----
NP_598845 -----
AAH58369 -----
A56861 -----
A40047 -----
NKCR_MOUSE -----
AAH61645 -----
BAC41068 -----
BAC34686 -----
```

3AB30711 -----  
3AB25645 -----  
3AB23880 -----  
NF00527760 -----  
NF01138503 -----NEKPSKE  
NF00510830 -----  
NF00510932 -----  
NF01595779 -----  
NF02014914 -----  
NF01930249 -----  
NF01929278 -----  
NF00523006 -----  
NF00508381 -----  
NF01215170 -----  
CSRTA -----  
NP\_783638 -----  
NF01612782 -----  
NF01612825 -----  
NF01607941 -----  
NF01607846 -----M  
NF01609144 -----  
NF01608897 -----  
NP\_758443 -----  
AAH61971 -----MLRLSERNMKVLF AAALIVGS  
32828710 -----  
338388 -----  
AF132148 -----  
NP\_611113 -----  
NP\_611695 -----  
NP\_610590 -----  
NP\_648697 -----  
NP\_648508 -----  
NP\_648338 -----  
NP\_476656 -----  
NP\_523874 -----  
NP\_523773 -----  
NP\_610224 -----  
NP\_733246 -----  
NP\_611935 -----  
EAA03569 -----  
EAA03948 -----MK  
EAA04625 -----  
EAA06299 -----  
EAA08127 -----  
EAA09839 -----  
EAA10133 -----MERDVFNEKPSKE  
EAL39647 -----  
EAA13913 -----  
EAA13914 -----LLA  
EAA14200 -----QP  
EAA01474 -----  
KP\_321072 -----

KP\_320182 -----MVQASTSKTDSEVCLFPTVPKNRRAFTPVYKNSN  
KP\_319131 -----  
KP\_311949 -----  
CAI11739 -----  
AAQ91263 -----  
NP\_001004626 -----MLQMKSR  
NP\_001002065 -----  
NP\_957499 -----  
AAQ94596 -----  
NP\_998184 -----S  
NP\_001002146 -----  
AAQ91264 -----  
AAH59458 -----KH  
AAH56814 -----  
AAH62863 -----VKH  
NP\_998629 -----  
NP\_957285 -----ELY  
NP\_506749 -----  
NP\_506561 -----  
NP\_504522 -----  
NP\_506751 -----  
NP\_497745 -----  
NP\_499828 -----  
NP\_497257 -----  
NP\_509506 -----  
NP\_503034 -----  
NP\_501118 -----  
NP\_496562 -----  
NP\_495855 -----  
NP\_496337 -----  
NP\_495417 -----  
NP\_493378 -----  
NP\_492343 -----  
NP\_493624 -----  
T06073 -----  
NP\_175776 -----  
NP\_567029 -----  
NP\_201554 -----  
NP\_200679 -----  
NP\_181407 -----  
NP\_191166 -----  
NP\_171696 -----  
NP\_195222 -----  
NP\_195213 -----  
NP\_196816 -----  
NP\_188932 -----  
NP\_191762 -----  
NP\_190046 -----  
NP\_180557 -----  
NP\_181157 -----  
NP\_179251 -----  
NP\_179709 -----

AAK02067 -----  
P82869 -----  
P05352 -----  
P49181 -----  
P05314 -----  
CSZPA -----  
E313994 -----  
E1335804 -----  
E1331567 -----  
S62327 -----  
S62590 -----  
E1294518 ----- --ENG  
P39728 -----  
E1263915 -----  
CSBY -----  
S30507 -----  
S12324 -----  
S57050 -----  
S48567 -----  
CSBYC3 -----  
S63359 -----  
S38324 -----  
PcCyP19 -----  
PcCyP20 -----  
PcCyP21.1 ----- --MRYLLLSKVTQ  
PcCyP21.3 ----- --MF  
PcCyP24.3 ----- --GGSVHAAGAYTSP  
PcCyP26 ----- --MVYLTR  
PcCyP28 ----- --MRK  
PcCyP30 ----- --VCVFLFF  
PcCyP35.1 -----  
PcCyP35.3 -----  
PcCyP40 -----  
PcCyP110 ----- --EHEIDGDLEE  
AAT44353 -----  
EAL37431 -----  
EAL37232 -----  
EAL37110 ----- --MRFIFAFISLLLGLI  
EAL36265 -----  
EAL35294 -----  
J68268 -----  
J68269 -----  
AAQ15626 -----  
AAB07896 -----  
AAK14937 -----  
CAC18541 -----  
A45000 -----  
Q9Y0F5 -----  
J47811 -----  
J50388 -----  
L46884 -----  
M93420 -----

J50389 -----  
G992633 -----  
E323073 -----  
S52758 -----  
E1203753 -----  
CAB58290 -----  
CAB58298 -----  
AAF69736 -----  
AAD46565 -----  
A53522 -----  
NP\_702112 -----  
NP\_701512 -----  
NP\_701389 -----  
NP\_701030 -----  
NF01067443 -----  
NF01067965 -----MKNLNQNMKNNDNKKNEKISGLEEN  
NF01065889 -----KNDVN  
NF00926916 -----  
S52760 -----MNKLVSIILVI  
J10322 -----  
CAB39039 -----  
CAD51648 -----  
NF01497907 -----  
NF01497552 -----S  
NF01497379 -----MNKLIATVLF I  
NF01497199 -----MKSNSK DSENKKVENLV-LDDN  
NF01496968 -----  
NF01495390 -----  
NF01495324 -----MFTLCKGYSDDEEEESNAINVV  
NF01493974 -----  
NF01493918 -----  
E316521 -----  
CAC35733 -----  
J47812 -----  
J47813 -----  
G2624966 -----  
E1317902 -----  
E1319851 -----  
G3057040 -----  
AAB81959 -----  
AF023860 -----  
AAB81961 -----  
AAF22215 -----  
AF243140\_1 -----  
AF252388 -----  
CSBOAB -----  
NF01922219 -----  
NF01725587 -----  
NF01897292 -----MKLLYTFAY I  
CSHYAC -----  
NF00071027 -----  
NF01951405 -----

NF01059378 -----  
NF01105745 -----  
NF00495096 -----  
NF01053198 -----  
CSPGA -----  
NF01950932 -----  
NF01951326 -----  
NF00909389 -----  
NF01286555 -----  
NF01737225 -----  
NF01590839 -----  
AAH51602 -----  
AAT69672 -----  
AAH54186 -----  
AAH54168 -----  
NF01208049 -----  
NF01844632 -----  
NF01844615 -----  
NF01915773 -----  
NF01915657 -----  
NF01557564 -----  
AAH41536 -----  
AAH85963 -----  
AAH64250 -----  
AAH61335 -----  
AAH59741 -----  
AAH67931 -----  
AAH44993 -----  
A40516 -----  
CYPB\_BOVIN -----  
AAR19276 -----  
A46579 -----  
AAV40687 -----  
NF01637248 -----  
CYPR\_BOVIN -----  
CYPR\_CALVI -----  
E1317906 -----  
AAB87888 -----  
AAB87889 -----  
J9XZZ5 -----  
363995 -----  
G1703696 -----  
J36797 -----  
AF017738 -----  
L37292 -----  
AAS01736 -----  
AAO61985 -----  
CAC80550 -----  
AAO63777 -----  
353522 -----  
E280557 -----  
J70827 -----

--RVQ

J70884 -----  
J55771 -----ALCR-----  
D1024669 -----  
227879 -----  
AAD48910 -----  
AAO51811 -----  
AAF76472 -----  
AAP80861 -----  
AAP73848 -----  
BAB62329 -----  
AAL75728 -----  
348017 -----  
348018 -----  
BAD53622 -----  
BAD53621 -----  
BAD53620 -----  
KP\_507188 -----  
KP\_483750 -----E-----  
KP\_483749 -----  
KP\_482125 -----  
KP\_478742 -----  
KP\_478741 -----  
NP\_385690 -----  
NP\_385689 -----MKILQF-----  
NP\_349373 -----  
BAD45990 -----  
BAD45991 -----  
NP\_908419 -----  
NP\_919903 -----  
BAD35839 -----MEG-----  
AAU87301 -----  
CAG90469 -----MKLLTSLFAILSI-----  
CAG88330 -----  
CAG88054 -----  
CAG86818 -----  
NF01109982 -----  
NF00686348 -----  
NF00686217 -----  
NF02138644 -----  
NF00926921 -----MARIGRILTLVV-----  
NF00909931 -----  
NF00956595 -----  
NF02035209 -----  
NF01329591 -----MKKLF-----  
CAG86678 -----  
CAG86274 -----  
CAG85447 -----  
CAG85287 -----MFK-----  
CAG84900 -----  
CAG84822 -----  
CAG84723 -----  
CAG79895 -----

CAG78939 -----  
CAG82238 -----  
CAG81980 -----  
CAG81971 -----  
CAG81844 -----  
CAG84141 -----  
CAG84091 -----  
CAG83821 -----  
CAG76968 -----MFKRT  
CAG62671 -----  
CAG76052 -----  
CAG59915 -----MLS  
CAG58658 -----  
G3777556 -----  
AAF65770 -----  
3AA25755 -----  
CSTO -----  
CSRP -----  
CSZM -----  
CYPH\_ALLCE -----  
AAG01536 -----  
AAB51386 -----  
554833 -----  
K85185 -----  
Y08273 -----  
Y08320 -----  
E1226445 -----  
L32095 -----  
CAA10766 -----  
AAF69796 -----  
AAF69795 -----  
CSNCM -----  
NF01287451 -----  
NF01527836 -----  
NF01488902 -----  
NF00648058 -----  
NF01487278 -----  
NF01486260 -----EKP  
NF00904102 -----MFLRRLLLAAT  
NF01484914 -----  
NF01484255 -----  
NF01483993 -----  
NF01533203 -----  
NF01483647 -----  
571849 -----  
J17900 -----  
NF00873669 -----  
NF01527595 -----  
NF01539217 -----  
D1035365 -----  
YP\_116397 -----  
YP\_119877 -----



CAD25897 -----  
CAD26352 -----  
AAD17998 -----  
G2959712 -----  
CSNCC -----  
AJ006689 -----  
AAF28343 -----  
AAD50375 -----  
AAK21908 -----  
AAG13968 -----  
BAB58884 -----  
E1363908 -----  
AAD16142 -----  
G1764137 -----  
Z32674 -----  
JT0686 -----  
CSCK -----  
NP\_986490 -----  
NP\_985014 -----MLA  
NP\_984799 -----  
NP\_984183 -----  
NP\_982586 -----  
NP\_982486 -----M  
AAT09096 -----MFSPL  
YP\_014938 -----  
NP\_951950 -----  
NP\_935388 -----  
NP\_907765 -----MRAST  
BAC91249 -----  
BAC90551 -----  
BAC89441 -----  
BAC88914 -----  
AAV50868 -----  
AAV82698 -----MTFLKYF  
AAV81872 -----  
NP\_736022 -----  
NP\_734780 -----  
YP\_085398 -----  
NP\_643098 -----  
NP\_641352 -----  
BAB76758 -----  
YP\_129479 -----  
YP\_129310 -----  
YP\_129032 -----  
YP\_101389 -----  
YP\_087816 -----  
YP\_087815 -----  
YP\_076496 -----MYNNRSPAGQQGGAGQGG  
AAT91289 -----  
AAT91260 -----  
NP\_868477 -----MTVRAFVLSLVGIAT  
NP\_867717 -----

|             |                      |
|-------------|----------------------|
| NP_867158   | -----VAN             |
| NP_865515   | -----                |
| NP_992233   | -----                |
| NP_991569   | -----MSASHRKEPLMFKRT |
| NP_280624   | -----                |
| 3AC18575    | -----TYE             |
| 3AC16839    | -----MFSFAPKHFLE     |
| 3AB82272    | -----                |
| 3AB99042    | -----                |
| 3AB97427    | -----MVGIS-----      |
| 3AC08372    | -----                |
| 3AC07690    | -----                |
| YP_072215   | -----MFKRT           |
| YP_069574   | -----                |
| NP_778719   | -----                |
| NP_245881   | -----                |
| NP_245880   | -----                |
| NP_354667   | -----MKLVRF          |
| NP_354666   | -----                |
| NP_298502   | -----                |
| AAN39296    | -----                |
| AAQ24380    | -----                |
| ZP_00353225 | -----                |
| ZP_00244808 | -----                |
| ZP_00244807 | -----MI              |
| ZP_00358245 | -----                |
| ZP_00350273 | -----                |
| ZP_00129494 | -----                |
| ZP_00130259 | -----                |
| ZP_00136576 | -----MLKRL           |
| NF01760157  | -----                |

|           |                                                |
|-----------|------------------------------------------------|
| CSHUA     | -----MV--NPTVFFD-----IAVDG-----EPL             |
| NP_839944 | -----MV--NSVVFFD-----ITVDG-----KPL             |
| NP_115861 | -----MSVTLH-----TDV                            |
| NP_570981 | -----MSVTLH-----TDV                            |
| NP_057143 | -----MAAIPDSDWQPPNVYLE-----TSM                 |
| CSHUB     | -----DEKKKGPKVTVKVYFD-----LRIG-----DEDV        |
| 366681    | -----EPIAK-----KARSNPQVYMD-----IKIG-----NKPA   |
| A57545    | LMKLQKGHVSLAAELSKET--NPVVFFD-----VCADG-----EPL |
| A41581    | -----DPSSSSSSG--NPLVYLD-----VDANG-----KPL      |
| A54204    | -----GFRKRGPSVTAKVFFD-----VRIG-----DKDV        |
| 364705    | -----LRYQFVKKKG-YVRLH-----TNK                  |
| 038552    | EVMAATQA--EGPKR-----VSDSAI IH-----TSM          |
| NP_624311 | -----MAVLE-----TTL                             |
| 32708309  | -----MAVANSSPVNPVVFFD-----VSIG-----GQEV        |
| A45981    | -----PQAKPSNPSNPRVFFD-----VDIG-----GERV        |
| J40763    | -----MGIKVQ-RPRCFFDIA-----INNQ-----PA          |
| A47328    | -----TSVAMGAQDRPQCHFDIE-----INRE-----PV        |
| KP_531396 | -CSFSDAAAENRVLLAMV--NPTVFFD-----IAVDG-----QPL  |
| KP_525294 | -----MPPP--LGALYYQ-----PWSTPLFFN-----ISDEGKPL  |

|            |                                                  |
|------------|--------------------------------------------------|
| KP_523512  | -----MPLP--PGAPYYQ-----PWSTP-----                |
| KP_507866  | -----SSSSG--NPLVYLD-----VDANG-----KPL            |
| KP_517783  | -MGFADATAARSPVLSAMV--NPTMFFDTD-----ISVDG-----EPL |
| KP_517773  | -----MV--KPIVFFD-----IAVDA-----KPS               |
| KP_526904  | -----MV--NPTVFFH-----IPVDS-----EPL               |
| KP_516556  | YTRFADAAATGSPILPAMV--SPTMVFD-----IAVNN-----KPL   |
| KP_526001  | CFLNYTAAATRSPILPAMI--NPIVCFN-----IIVNG-----KPL   |
| KP_516021  | -----RKLLCVTSGPASALRSVTLH-----TDV                |
| KP_515886  | -----MGIKVQ-RPRCFFDIA-----INNQ-----PA            |
| KP_525218  | -----M--PALIYRS-----FGDRQ-----QVM                |
| KP_507684  | SRRFADAAAENRVLLAMV--NPTVFFG-----IAVDG-----EPL    |
| KP_524688  | -----MAVANSSPVNPVFFD-----VSIG-----GQEV           |
| KP_513346  | -----G-----NKPA                                  |
| KP_524598  | -----ATAGSPVLSATV--NPTVFID-----DES-----L         |
| KP_515004  | -----                                            |
| KP_523437  | -----TSAVGNPVLSAMV--NPTVFFD-----IAANG-----GPL    |
| KP_520485  | -----APAIV--NPTVFFD-----IAVDG-----GPL            |
| KP_519076  | -----VLLAMV--NPTVFFD-----IAVDG-----EPL           |
| KP_527705  | -----MV--NHTMFFD-----VAVDS-----EPL               |
| KP_527529  | DADGLRLSPPPPRVCSGGGAGAMAVLLE-----TTL             |
| KP_518678  | -----HSNGSQFYITLQAT-----PYL                      |
| CSMSA      | -----MV--NPTVFFD-----ITADD-----EPL               |
| NP_598845  | -----CSDGGARGANSSSG--NPLVYLD-----VGADG-----QPL   |
| AAH58369   | -----MAAIPPDTWQPPNVYLE-----TSM                   |
| A56861     | -----NDKKKGPKVTVKVYFD-----LQIG-----DESV          |
| A40047     | -----GVRKRGPSVTDKVFFD-----VRIG-----DKDV          |
| NKCR_MOUSE | -----ALAMGAQDRPQCHFDIE-----INRE-----PV           |
| AAH61645   | -----MSVTLH-----TDV                              |
| 3AC41068   | -----                                            |
| 3AC34686   | -----PSNSKNPRVFFD-----VDIG-----GERV              |
| 3AB30711   | -----MAVLLE-----TTL                              |
| 3AB25645   | -----MAVANSSPVNPVFFD-----VSIG-----GQEV           |
| 3AB23880   | -----MAVANSSPVNPVFFD-----VSIG-----GQEV           |
| NF00527760 | -----HTSLAAELSKDT--NPVFFD-----VCADG-----EPL      |
| NF01138503 | EVMAATQA--EGPKR----VSDSAIVH-----TSM              |
| NF00510830 | -----PQVYMD-----IKIG-----NKPA                    |
| NF00510932 | -----MAAIPPDTWQPPNVYLE-----TSM                   |
| NF01595779 | -----MV--NPTMFFD-----IMADD-----EPL               |
| NF02014914 | -----MV--NPTVFFD-----ITADD-----EPL               |
| NF01930249 | -----MILV--ARSENAN-----SAAATRLCRR--CVLPHHRRWQAL  |
| NF01929278 | -----MV--NPTVFFD-----ITADDD-----EPL              |
| NF00523006 | -----MV--NPTVFFD-----ITANE-----EPL               |
| NF00508381 | -----MV--NPTVFFD-----ITADD-----EPL               |
| NF01215170 | -----MSVTLH-----TDV                              |
| CSRTA      | -----MV--NPTVFFD-----ITADG-----EPL               |
| NP_783638  | -----MSVTLH-----TDV                              |
| NF01612782 | -----MSHPSPAAPKPSNSKNPRVFFD-----VDIG-----GERV    |
| NF01612825 | -----EPAAPK-----KARSNPQVYMD-----IKIG-----NKPA    |
| NF01607941 | -----PSPAAPKPSNSKNPRVFFD-----VDIG-----GEXV       |
| NF01607846 | ASPVEQPLRKGPVHIADTV--NPTVFFN-----ITADG-----EPL   |
| NF01609144 | -----GSSGVRKRGLVTDKVFFD-----VRIG-----DKDV        |
| NF01608897 | -----MV--NLTMFFN-----ITADG-----EPL               |

|              |                                                 |
|--------------|-------------------------------------------------|
| NP_758443    | -----ARGANSSSQ--NPLVYLD-----VGADG-----QPL       |
| AAH61971     | VVFLLLPGPSVANDKKKGPKVTVKVYFD-----FQIG-----DEPV  |
| G2828710     | -----MGIKVQ-RPRCFFDIA-----INNQ-----PA           |
| 338388       | -----MST-LPRVFFD-----MTADN-----EPL              |
| AF132148     | -----MSVVE-----TTM                              |
| NP_611113    | -----KG-YVRLN-----TNL                           |
| NP_611695    | -----ADDSKGPKVTEKVFFD-----ITIG-----GEPA         |
| NP_610590    | -----MRQNSRLKSVTLH-----TDV                      |
| NP_648697    | -----MS--LPRVYFD-----IAAGG-----EKL              |
| NP_648508    | -----MSNIYIQEPPTSGKVLLK-----TTV                 |
| NP_648338    | -----MEERKLLRAVKS-TNPLVYLD-----ISIGK-----EDA    |
| NP_476656    | -----ASGLSFTVTSRIYMDVKHNK-----KPV               |
| NP_523874    | -----NNAGGIPDKAWQPHFVTL-----TSM                 |
| NP_523773    | -----AVIEK---AE--KRNPQVFFD-----IRIG-----GNDA    |
| NP_610224    | -----MPNWNQIQSQLRSSNPNPVVFFD-----IAVG-----TTEI  |
| NP_733246    | -----MTVNKR DAGATRPRCFFDIS-----LGGL-----GM      |
| NP_611935    | -----YENVVLH-----TTK                            |
| EAA03569     | -----DVIKVQRAVHDPKNPLVYLD-----VKVGE-----ESV     |
| EAA03948     | LFVVLSVLIAGALASGEGPKVTDKVYFD-----ITIG-----GKPE  |
| EAA04625     | -----MPTWTQMQGQLRNPNNPVVFM-----ITVG-----TAEI    |
| EAA06299     | -----MS--LPRCFFD-----MTVDN-----QPL              |
| EAA08127     | -----RCFFDVS-----LGGL-----PA                    |
| EAA09839     | -----RYERVKKKG-YVRL-----TNF                     |
| EAA10133     | DIISVTEG--QGVQK-----IYDNAVLH-----TTM            |
| EAL39647     | -----MSVVE-----TTI                              |
| EAA13913     | -----QSVTFH-----TDV                             |
| EAA13914     | IYASLPGDIEAATFTVTSQVYMDV SIDG-----EKI           |
| EAA14200     | MDTGTDEVQPKPKAAEEKKRNPQVFFD-----IRIG-----NSDV   |
| EAA01474     | -----LANYCISQLVEIN-----GQPF                     |
| KP_321072    | -----VSLVPAAPASSGSSSIVIN-----GQPF               |
| KP_320182    | NLVMLAIQTPNSGGIPDKLWQPHFVAFE-----TTM            |
| KP_319131    | -YASLPGDIEAATFTVTSQVYMDV SIDG-----EKI           |
| KP_311949    | ----DSDAGGAAAEP PPPQQEKIRCFFDVS-----LGGL-----PA |
| CAI11739     | ----MALAEFYISNLRSTGHIFVYMD-----IENGG-----EAV    |
| AAQ91263     | -----MA--NPKVFFD-----ITIDG-----KEA              |
| NP_001004626 | LKYCSVSLAASRLLSGPGK--NPVVFM-----IAADG-----EFI   |
| NP_001002065 | -----MSNPTPEAKPGNAENPRVFFD-----VEIG-----AERV    |
| NP_957499    | -----MNVQPSNPNNPIVFFD-----VSIG-----GQEV         |
| AAQ94596     | -----MNVQPSNPNNPIVFFD-----VSIG-----GQEV         |
| NP_998184    | VVFLLLFPSETEADEKKGPKVTAKVYFD-----IKIG-----DEDA  |
| NP_001002146 | -----MAVTLH-----TDL                             |
| AAQ91264     | -----MA--RPKVFFD-----LTAGG-----NPV              |
| AAH59458     | GSRALAQHPANGKESKAMA--RPKVFFD-----LTAGG-----NPV  |
| AAH56814     | -----                                           |
| AAH62863     | GSRALAQHPANGKESKAMA--RPKVFFD-----LTAGG-----SPV  |
| NP_998629    | -----MGVKAQ-RPRCFFDIG-----ISNV-----PA           |
| NP_957285    | RDYKGDPELLASTMKEPEAKKTDKFNAAH-----YST           |
| NP_506749    | -----MS--RPRVFFD-----ITIAG-----KPT              |
| NP_506561    | -----Q--RPKVFFD-----VSI GE-----EPA              |
| NP_504522    | -----NKFQPNRWFDS-----IHYVTNT                    |
| NP_506751    | -----MS--RSKVFFD-----ITIG-----KAS               |
| NP_497745    | -----MAAEKR--VFLDIS-----VDEN-----LI             |

|           |                                           |
|-----------|-------------------------------------------|
| NP_499828 | -----MP--RVKVFFD-----ITIGG-----KKG        |
| NP_497257 | -----RGPRVTDKVFFD-----MEIG-----GRPV       |
| NP_509506 | -----VRGNKRAFFDIS-----INGE-----PA         |
| NP_503034 | -----STKLPRVYLG-----VKIG-----IRYI         |
| NP_501118 | -----MPAPIND--QAPYVILD-----TTM            |
| NP_496562 | -----MSNQYINEPITTGKVTLE-----TTA           |
| NP_495855 | -----LRHPDNPIVFLE-----VTAG-----GAPI       |
| NP_496337 | -----RYSRVKKNA-FVRLV-----TNF              |
| NP_495417 | -----MSVTLH-----TTS                       |
| NP_493378 | -----EGGEK----VLNKEAIIH-----TSF           |
| NP_492343 | -----MAVLIE-----TTL                       |
| NP_493624 | -----DDAKGPKVTDKVYFD-----MEIG-----GKPI    |
| Γ06073    | -----MA--FPKVYFD-----MTIDG-----QPA        |
| NP_175776 | -----MSVLIV-----TSL                       |
| NP_567029 | -----NOVGEDLEGVTHKVYFD-----IQIN-----GSPA  |
| NP_201554 | -----FELIKVEKNPKKKG-YVQFQ-----TTH         |
| NP_200679 | -----HKVYFD-----VEID-----GKAA             |
| NP_181407 | -----RPPNPKNPVFFD-----VSIG-----GIPA       |
| NP_191166 | -----MA--NPKVFFD-----ILIGK-----MKA        |
| NP_171696 | -----MVSRLSISVTLH-----TNL                 |
| NP_195222 | -----KQVIEDHEITNRVFLD-----VDID-----GQRL   |
| NP_195213 | -----MS--NPRVFFD-----MSLSG-----TPI        |
| NP_196816 | -----THKVYFD-----ISVGNPV-----GKLA         |
| NP_188932 | -----MANPKVFFD-----LTVDG-----KPA          |
| NP_191762 | -----QAKVTNKVYFD-----VEIG-----GEVA        |
| NP_190046 | -----ATTS----LPENVIMH-----TTL             |
| NP_180557 | -----SIQAKEDLKEVTHKVYFD-----VEID-----GKSA |
| NP_181157 | -----MSARPEG--SPPEVTLE-----TSM            |
| NP_179251 | -----MAT--NPKVYFD-----MTVGG-----KSA       |
| NP_179709 | -----MAS--HPKVFFD-----MTIGG-----APA       |
| AAK02067  | -----MGRSKCFMD-----ISIGG-----ELE          |
| ρ82869    | -----                                     |
| Γ05352    | -----MAKKKNPQVFMD-----VSIDG-----DPA       |
| Γ49181    | -----MTKKKNPNVFLD-----VSIGG-----DPV       |
| Γ05314    | -----MSTVYVLEPPTKGKIVN-----TTH            |
| CSZPA     | -----MS-NCFD-----VIANGQ-----PL            |
| Ξ313994   | -----MANVELQ-----TSL                      |
| Ξ1335804  | -----NRGPKVTDTVYFD-----LQQG-----DEFL      |
| Ξ1331567  | -----MSTEPVVFMD-----IAIDGR-----LL         |
| 362327    | -----MS-----TYAYFK-----ISID-----GKIQ      |
| 362590    | -----AEEDYMLNHTRIKHKG-YARIV-----TNH       |
| Ξ1294518  | NILLG-----KAAIIH-----TTQ                  |
| Γ39728    | -----MSVLIE-----TTV                       |
| Ξ1263915  | -----PLATGTVILK-----TTR                   |
| CSBY      | -----MS-QVYFD-----VEADGO-----PI           |
| 330507    | -----SRLFSNSASRLGKKVFFD-----PAVNGT-----KI |
| 312324    | -----DEVITQKVFFD-----IEHG-----EEKV        |
| 357050    | -----MIQDPLVYLDIS-----IDK-----KPI         |
| 348567    | -----MT-----RPKTFFD-----ISIG-----GKPQ     |
| CSBYC3    | -----HRGIITIEYFD-----PVSK-----SMKE        |
| 363359    | -----NIGIVFTD-----PESS-----EEAG           |
| 338324    | -----DPEITHKVYFD-----INHG-----DKQI        |

|            |                                                     |
|------------|-----------------------------------------------------|
| FcCyP19    | -----MSYKPHHATVPT--NPKVFFD-----VSIGG-----QSA        |
| FcCyP20    | -----MSVVIS-----TTR                                 |
| FcCyP21.1  | LLLLLLLMLSAAVSARADPVVTDKVFYD-----ITIG-----DEPV      |
| FcCyP21.3  | SRTWFWAQRKLPFYYPINPK--NPLVFFE-----ISIGA-----QPA     |
| FcCyP24.3  | YPQNARNSVVYLDTAVQEGYTWFGSASM-----KPI                |
| FcCyP26    | LVRRVHRGPIRNIFSYPLNEVNPVVFEE-----ITVEG-----DAL      |
| FcCyP28    | INVPSKGERRRGIPVEVSR--NPKVFFD-----ISIDN-----KPS      |
| FcCyP30    | LSFFFEGIKKMLHSSRHHLASAGRVFMDVA-----IGS-----CSP      |
| FcCyP35.1  | -----PADYAHSEYKMAAYASWKKFLQERGNRYCWMSVVSIDN-----VPC |
| FcCyP35.3  | -----SMVQQRQDLLASTK-----GAGEP-----EII               |
| FcCyP40    | -----MG-KLCWLQ-----ISIGGK-----PAK                   |
| FcCyP110   | QRVQHIITAATGRAMEWESSVIHVSLFV-----DVF                |
| AAT44353   | -----MG--KPQVFFD-----ISIGG-----QPA                  |
| EAL37431   | -----MPNPVVYFD-----ISIGQ-----TPA                    |
| EAL37232   | -----MSVRII-----TNY                                 |
| EAL37110   | VSVFAEKGVRRPS-TVTPSVVVELTVSID-----KEE               |
| EAL36265   | -----MSVLIE-----TTL                                 |
| EAL35294   | -----MIKDPELRPQRHKDNPVVFLLD-----ICLLDE-----NNGI     |
| J68268     | -----MSYKPHHPTVPT--NPKVYFD-----ITIGG-----TPA        |
| J68269     | -----MSYEPHHPVPS--NPKVYFD-----ISIGG-----QGA         |
| AAQ15626   | -----AAQRKIPFYVNPNS--NPLVYFD-----ISIGS-----QKA      |
| AAB07896   | -----MSYRPHHATVPT--NPKVYFD-----VSIAG-----QAA        |
| AAK14937   | -----FFDLFSQTLPEMSK-RPRVYFD-----LTVGG-----AKA       |
| CAC18541   | -----PAPMVSERMNNPKNPVVFDD-----ISIG-----GQDI         |
| A45000     | -----GVKCFDD-----ISIGG-----KPA                      |
| Q9Y0F5     | -----MSVRII-----TNY                                 |
| J47811     | -----MS--RPKVFFD-----ITIDG-----SNA                  |
| J50388     | -----MRTK-----KQKRNLPRVFFD-----IRIG-----NGDA        |
| L46884     | -----MAAKAFFD-----IKAGDE-----RL                     |
| M93420     | -----K-----KQKRNLPRVFFD-----IRIG-----NADR           |
| J50389     | -----GNGPKVTEKVFFD-----IEVD-----EQPL                |
| G992633    | -----ANGPKVTDKVFFD-----IEVD-----GKPL                |
| E323073    | -----EEMRTK-----KQKRNLPRVFFD-----IRIG-----NGDA      |
| 352758     | -----LSQASADPEVTAKVYFD-----VMID-----SEPL            |
| E1203753   | -----MPYTPHYPVVES--NPKVWMD-----IDIGG-----KPA        |
| CAB58290   | -----MGQVARVVQVQ-----SSA                            |
| CAB58298   | -----TT--NPKVFFD-----ISIDN-----KAA                  |
| AAF69736   | -----MPNTYCYLD-----IAIGGK-----PKR                   |
| AAD46565   | -----AAEPEVTAKVYFD-----VMID-----SEPL                |
| A53522     | -----LAVSGAVAENAGVRKAYMDIDIDG-----EHA               |
| NP_702112  | -----MSEVYSIEPKTHGKVIIY-----TSL                     |
| NP_701512  | -----KSIRDYVFFD-----IAIEN-----KYV                   |
| NP_701389  | --MNIPNPRVFLDIAIGG-----RNA                          |
| NP_701030  | -----MSLSIH-----TNY                                 |
| NF01067443 | -----MKKKKYVYLE-----FSIN-----RITL                   |
| NF01067965 | EEHNNNNIVPYLSNLLTNPSNPVVFMD-----INLG-----NHFL       |
| NF01065889 | SLISNPLKNIETIHKN----TPKSAIIY-----TTM                |
| NF00926916 | -----SKRSKVFFD-----ISIDN-----SNA                    |
| 352760     | FFLFHKYALCAEEHEITHKTYFDITIDD-----KPL                |
| J10322     | -----YYLSNLLTNPSNPVVFMD-----INLG-----NHFL           |
| CAB39039   | -----MSKRSKVFFD-----ISIDN-----SNA                   |
| CAD51648   | KEQKKSFEKINYYKLGNIERSHITIY-----TNL                  |

|            |                                                |
|------------|------------------------------------------------|
| NF01497907 | -----MSRAKVFFD-----ISIDN-----KNA               |
| NF01497552 | SLLST--KSIENIEKNNNTKTPKSAIIY-----TTM           |
| NF01497379 | LALFQTY-INAETPEITHKAYFDISIND-----KPI           |
| NF01497199 | DE---NTIIPYYLSNLLTNPSNPVFFD-----INLG-----NNFL  |
| NF01496968 | -----MGKKKKYVYLE-----FSIN-----TIRL             |
| NF01495390 | -----KAIRDYVFFD-----IAVEN-----KYI              |
| NF01495324 | SEKTKSLEEKIAYYKMKGHTERGYITIY-----TNL           |
| NF01493974 | -----                                          |
| NF01493918 | -----MSEVYSIEPKTCGKVIIY-----TSL                |
| E316521    | -----MANVFFD-----VQFGGD-----AP                 |
| CAC35733   | -----MSIVLE-----TSL                            |
| J47812     | -----MT--RPRVFFD-----ITIGG-----QOS             |
| J47813     | -----MS--RPKVYFD-----ITIDG-----SNA             |
| G2624966   | -----MARPKVFFD-----ITIG-----GEKA               |
| E1317902   | -----VLDADTVKYARVSKNG-YVRII-----TNY            |
| E1319851   | -----ILDADTVKYARVNKNG-YVRIL-----TNY            |
| G3057040   | -----ALDADTVKYARVNKNG-YVRIL-----TNY            |
| AAB81959   | -----MV--NPTVFFD-----IAVDG-----EPL             |
| AF023860   | -----MV--NPTVFFD-----IAVDG-----EPL             |
| AAB81961   | -----MV--NPTVFFD-----IAVDG-----EPL             |
| AAF22215   | -----MV--NPTVFFD-----IAVDG-----EPL             |
| AF243140_1 | -----D-----IAVDG-----EPL                       |
| AF252388   | -----SSSSSSG--NLLVYLD-----VGADG-----QPL        |
| CSBOAB     | -----V--NPTVFFD-----IAVDG-----EPL              |
| NF01922219 | -----MAVELHSTVYMD-----LSIGG-----MDA            |
| NF01725587 | -----MS--NPRVFFD-----VTANG-----KPV             |
| NF01897292 | NILKAEEDAPQIRVTKIAHLDITVNGEP-----QEQ           |
| CSHYAC     | -----MV--NPTVFFD-----ISADG-----EPL             |
| NF00071027 | -----MV--NPTVFFD-----IAVDG-----EPL             |
| NF01951405 | TTHEAAAIEDDVVRYQYVKKKG-YVRLH-----TNK           |
| NF01059378 | -----V--NPTVFFD-----IAVDG-----EPL              |
| NF01105745 | -----MP--NPQVFFD-----MTVGG-----APA             |
| NF00495096 | -----MV--NPTVFFD-----ISADG-----EPL             |
| NF01053198 | -----MAS--NPKVFFD-----MEVGG-----QPV            |
| CSPGA      | -----V--NPTVFFD-----IAVDG-----EPL              |
| NF01950932 | -----MAVTLH-----TDV                            |
| NF01951326 | -----MSHPSPVERPGNPRNPRAFFD-----VDIG-----GERV   |
| NF00909389 | -----MP--NPKVFFD-----MTIGG-----QSA             |
| NF01286555 | -----MA--NPKVYFD-----MTIGG-----APA             |
| NF01737225 | -----MAA--NPKVFFD-----MTVGG-----SPA            |
| NF01590839 | -----MNNLKNIEALKEDGLYAAID-----TDK              |
| AAH51602   | -----HASAGIPHDTWQPPHVLVE-----TSM               |
| AAT69672   | -----MA--LPRVFFD-----VAADG-----CPL             |
| AAH54186   | EAAIYAPGKHCLLSFCTMA--LPRVFFD-----VAADG-----CPL |
| AAH54168   | -----SSVADDKKGPKVTDKVYFD-----LKIG-----DEEV     |
| NF01208049 | -THEAAAIAEDTVRYQYVKKKG-YVRLH-----TNK           |
| NF01844632 | -----MGVKVQ--RTRCFFDIA-----VNNV-----PA         |
| NF01844615 | -----MSNIYIQEPPSNGKVLK-----TTA                 |
| NF01915773 | -----MSGIPHDTWQPPHVLLE-----TSM                 |
| NF01915657 | -----MSVTLH-----TDL                            |
| NF01557564 | -----MSNPSPVAKPSNPSNPKVFLD-----VEIG-----GERV   |
| AAH41536   | -----MA--LPRVFFD-----IAANE-----CPM             |

|            |                                                          |
|------------|----------------------------------------------------------|
| AAH85963   | -----MGIKVQ-RPRCFFDIA-----INNQ-----PA                    |
| AAH64250   | -----MAVPASNANNPIVFFD-----ISIG-----GQEV                  |
| AAH61335   | -----MSNPSPVAKPSNPSNPKVFLD-----VEIG-----GERV             |
| AAH59741   | -----MA--LPRVFFD-----IAVDG-----CPM                       |
| AAH67931   | -----CFFDIA-----INNA-----PA                              |
| AAH44993   | -----TVRYQYVKKKG-YVRLH-----TNK                           |
| A40516     | -----DERKKGPKVTAKVFFD-----LRVG-----EEDA                  |
| CYPB_BOVIN | -----DEKKKGPKVTVKVYFD-----LRIG-----DEDI                  |
| AAR19276   | -----SAITAG-----ADG-----QAL                              |
| A46579     | -----POAKPSNPSNPRVFFD-----VDIG-----GERV                  |
| AAV40687   | -----MDD---RPIVFFD-----IAIG-----GQLA                     |
| NF01637248 | -----RPLANVYFD-----ITINNO-----PA                         |
| CYPR_BOVIN | -----DSLTAEFKET--NPVFFD-----ICADD-----EPL                |
| CYPR_CALVI | -----LSFTVTSTKIYMDVKHQK-----KPL                          |
| E1317906   | -----VLDDDTVRYSRVKKNG-FVRLV-----TNF                      |
| AAB87888   | -----MST-LPRVFFD-----MTADG-----EPL                       |
| AAB87889   | -----MST-LPRVFFD-----MTADG-----EPL                       |
| Q9XZZ5     | -----MA--LPKVFFD-----ITIGG-----NAT                       |
| 363995     | -----MA--HPRVFFD-----MSADG-----QPV                       |
| E1703696   | -----MA--KPQVFFD-----LQANG-----ENL                       |
| J36797     | -----                                                    |
| AF017738   | -----MK-----TTV                                          |
| L37292     | -----MSKKDRRRVFLDVT-----IDGN-----LA                      |
| AAS01736   | -----PNPFFD-----MTVGG-----QPV                            |
| AAO61985   | -----MGLFLGFELTSAKFYKLPVIFYIINGSMWFIYSYSYIFYISN-----YSVS |
| CAC80550   | -----MAA--NPKVFFD-----MTVGG-----APA                      |
| AAO63777   | -----MA--NPKVYFD-----MTIGG-----APA                       |
| 353522     | -----YSSRLSTMPNPRVFFD-----ISIDK-----KPA                  |
| E280557    | -----ETNYDPVVTHKAFFDISIGS-----KPI                        |
| J70827     | -----MSKKDRRRVFFDVT-----IDGN-----LA                      |
| J70884     | -----MSKKDRRRVFLDVT-----IDGS-----LA                      |
| J55771     | -----KPKPVEPSHKVTHHVHLEVQTG-E-----KAT                    |
| O1024669   | -----TEKKPKGPKVTDIVYFD-----ITIG-----GKPA                 |
| 227879     | -----E--NPRVFFD-----ITIGG-----VEA                        |
| AAD48910   | -----SEAGKDPKITNKVFFD-----IEID-----NKPA                  |
| AAO51811   | -----STSLAPNNTLNNENPIVFMD-----VAIVNOQN-----PVHL          |
| AAF76472   | -----MSVTLH-----TNL                                      |
| AAP80861   | -----VTHKVYFD-----IEID-----GKPA                          |
| AAP73848   | -----VDWHLRPPNPKNPVFFD-----VTIG-----SIPA                 |
| 3AB62329   | -----MWGSADG--GTPEVTLE-----TSM                           |
| AAL75728   | -----MAPAASSKSNPRVFLD-----IAIGG-----EWV                  |
| 348017     | -----MS--NTRVFFD-----MTVGG-----APA                       |
| 348018     | -----MASKNPKVFFD-----ILIGK-----ARA                       |
| 3AD53622   | -----KKSADLTEVTHKVYFD-----VEID-----GKPA                  |
| 3AD53621   | -----LIHLAKKSKADLTEVTHKVYFD-----VEID-----GKPA            |
| 3AD53620   | -----AATLSLAQAVESEAELTKVTTKVFFD-----ITIN-----GKPA        |
| KP_507188  | -----RTLGAELATCPD-----SEPL                               |
| KP_483750  | ELLAVSDLGKTATTS-----LPDNLVMH-----TSM                     |
| KP_483749  | -----VGKEAAAE-----EMI                                    |
| KP_482125  | -----IKDNPN-----LED                                      |
| KP_478742  | -----SVEKGDGSTFFPTAGGEP-----KSV                          |
| KP_478741  | -----VEFSVEKGDGSTFFPTAGGEP-----KSV                       |



|            |                                              |       |
|------------|----------------------------------------------|-------|
| NP_385690  | -----MAEIKDPENTIIMET-----                    | TKG   |
| NP_385689  | AVAGALALAAFTGGALAQSGENILTVQL-----            | EDG   |
| NP_349373  | -----MKNPIVTIEM-----                         | ENG   |
| 3AD45990   | -----MSVLIV-----                             | TSV   |
| 3AD45991   | -----MSVLIV-----                             | TSV   |
| NP_908419  | -----LPVTAKAFLDVSIGG-----                    | EPA   |
| NP_919903  | -----VSDKAFGDLLKLVKNILPG-----                | GNKL  |
| 3AD35839   | GGEGAESA AVASAAAAEVEVKNPRCFMD-----VSIGG----- | EIE   |
| AAU87301   | -----MP--NPKVFFD-----MQVGG-----              | APA   |
| CAG90469   | AVLFFGKYINASKDLAENPPITHKVFFD-----VTEE-----   | GKPI  |
| CAG88330   | -----MS-QVYFD-----ISADGN-----                | KL    |
| CAG88054   | -----MSVLE-----                              | TTE   |
| CAG86818   | ----GKKQKPVAVNK-----SSKIILH-----             | TTL   |
| NF01109982 | -----MA--NPKVFFE-----VSANG-----              | EPL   |
| NF00686348 | -----MTPENTLNLDL-----                        | STG   |
| NF00686217 | -----                                        | ----- |
| NF02138644 | -----MS--NPKVFFD-----IVIGK-----              | MKA   |
| NF00926921 | FAAVGLFLFMGQTVEAKGPKITSKVYFD-----IEHD-----   | GQPL  |
| NF00909931 | -----MP--NPKVFFD-----MTIGG-----              | QPA   |
| NF00956595 | -----QVYMD-----IKIG-----                     | NKPA  |
| NF02035209 | -----MDAAATSLPTNP--NPKVFFD-----MSIGG-----    | APA   |
| NF01329591 | LATSLVLASG-----QLFANTI IDMK-----             | TSM   |
| CAG86678   | -----MSVTFH-----                             | TKT   |
| CAG86274   | ----LITHKVHIEITKLAKRKNKDGVKP-----            | VVI   |
| CAG85447   | -----MSSLEPATTAKVALI-----                    | TTK   |
| CAG85287   | PVN--FTRQTRLFSSSARNWGTKVFIT-----PSIGGV-----  | KQ    |
| CAG84900   | -----MSDKLN-RPKVFFD-----ISAD-----            | GKPK  |
| CAG84822   | -----MKVELLRPCSYIDIS-----IGG-----            | SKT   |
| CAG84723   | -----MNPVVFLD-----VNKG-----                  | DVPL  |
| CAG79895   | ----LAFFVQPAQAEPDAEITHKVYFD-----IKQG-----    | EESL  |
| CAG78939   | -----NCQG-----                               | KR    |
| CAG82238   | -----MTN-----PRVFFE-----VAIG-----            | GKTI  |
| CAG81980   | -----MSNQVYFD-----VSADGQ-----                | PL    |
| CAG81971   | -----MFRQIRHFSTSPLRNNVYFN-----VSANGN-----    | PL    |
| CAG81844   | -----MT-ITFLD-----VTYD-----                  | GQRI  |
| CAG84141   | -----MEPQTTAKVVL-----                        | TTK   |
| CAG84091   | -----MSAFVYMDFA-----VGG-----                 | EPV   |
| CAG83821   | -----MRAYLD-----                             | VQSPA |
| CAG76968   | LVAAAALISLTAFSPAFAASGTTTHVLLT-----           | TSA   |
| CAG62671   | -----MKVYLDIA-----IAG-----                   | EQI   |
| CAG76052   | -----MITLH-----                              | TNH   |
| CAG59915   | RIS-----MQKRFLSSTVAKLGKKVYFE-----PSVNGS----- | RI    |
| CAG58658   | -----MS-KVYFD-----IEADGQ-----                | PL    |
| 33777556   | -----MVKCFFD-----VSIA-----                   | GKPS  |
| AAF65770   | -----GG-----                                 | APV   |
| 3AA25755   | -----MS--NPKVFFD-----MTVGG-----              | QNA   |
| CSO        | -----MA--NPKVFFD-----LTIGG-----              | APA   |
| CSR        | -----MV--NPKVFFD-----MTVGD-----              | KAA   |
| CSZM       | -----MA--NPRVFFD-----MTVGG-----              | APA   |
| CYPH_ALLCE | -----                                        | ----- |
| AAG01536   | -----MA--NPKVFFD-----LTIGG-----              | QPA   |
| AAB51386   | -----MA--NPRVFFD-----LTIGG-----              | APA   |

|            |                                                    |
|------------|----------------------------------------------------|
| 354833     | -----MP--NPKVFFD-----MTIGG-----QPA                 |
| K85185     | -----MP--NPRVFFD-----MSVGG-----QPA                 |
| Y08273     | -----MS--LPKVFFD-----MSIGG-----QPC                 |
| Y08320     | -----MS--NPKVFFD-----MTIGG-----QPC                 |
| E1226445   | -----MS--NPKVFFD-----MAIAG-----NPA                 |
| L32095     | -----VTSKIFFD-----IEIG-----GESA                    |
| CAA10766   | -----VEWHQKLPNPKNPVFFD-----VTIG-----TIPA           |
| AAF69796   | -----MSQVYFD-----IAINNA-----PA                     |
| AAF69795   | -----MSDVYFD-----IAINSQ-----PA                     |
| CSNCM      | -----TSSIMSKVFFD-----LEWEGPVLGPNNKPTSEIKA--QS      |
| NF01287451 | -----MSVLE-----TSA                                 |
| NF01527836 | -----MSVTLH-----TTL                                |
| NF01488902 | -----M                                             |
| NF00648058 | -----MSSTDDVKQARSRVFFD-----ITIG-----GKAA           |
| NF01487278 | -----GPKITHKVYFD-----IEQG-----DKPL                 |
| NF01486260 | TVLGGP---KKVEQKAAETGTSAVIH-----TTY                 |
| NF00904102 | LFLGAMLLFAQSAEAAKGPKITHKVYFD-----IEQG-----DKPL     |
| NF01484914 | -----MSVLE-----TSA                                 |
| NF01484255 | -----MAPTVLPASGNPLVFFD-----ITLG-----GEPL           |
| NF01483993 | -----MSAIYNLEPQPTASAIH-----TTQ                     |
| NF01533203 | -----MA--NPRVYFD-----MSVGG-----SPA                 |
| NF01483647 | -----LKPSHRIKNKG--YVRME-----TNL                    |
| 371849     | -----SAIMGNKVFFD-----IEWEGPVMQG--GKPTSTVKE--QS     |
| J17900     | -----ATLVS---ASTNPKVTNKVYFD-----IKQG-----DKDL      |
| NF00873669 | -----MS--NVFFD-----ITKNGA-----PL                   |
| NF01527595 | -----MS--NVFFD-----ITKNGS-----PL                   |
| NF01539217 | -----KSNMAIKTYFD-----VTWEGPVLDAASGKPTSTVQE--QA     |
| 01035365   | -----LFMGQTVEAKGPKITSKVYFD-----IEHD-----GQPL       |
| YP_116397  | -----MTKVNLE-----TNF                               |
| YP_119877  | -----TTGGDATVSVSVE-----TNQ                         |
| CAD25897   | -----EVLKALAMHGTPYLDVEYNVGG-----KRS                |
| CAD26352   | -----MAKEASGNVYFD-----VYANEE-----SL                |
| AAD17998   | -----ALVNASEPRGPKITNKVYFD-----IQHG-----DESL        |
| 32959712   | -----MP--NPIVFFD-----ITADG-----APV                 |
| CSNCC      | -----MSKVFFD-----LEWEGPVLGPNNKPTSEIKA--QS          |
| AJ006689   | -----FHQTPSAMSQVFFD-----VEYA-----PVGTAET--KV       |
| AAF28343   | -----TVTLO-----TTV                                 |
| AAD50375   | -----MTG--IIRNKVFFQ-----IKQG-----NTPL              |
| AAK21908   | -----                                              |
| AAG13968   | -----NTTRVRFYSSTMSKPNVFFD-----ISFNG-----VT         |
| 3AB58884   | -----MSKPNVFFD-----ISFNG-----VT                    |
| E1363908   | -----MS--NVFFD-----ITKNGA-----PL                   |
| AAD16142   | -----MSGNTKAFFD-----IQYA-----PVGSSAP--KT           |
| 31764137   | -----MANCYFD-----VSSNGK-----PL                     |
| Z32674     | -----MGNKVFFD-----IEWEGPVMQG--CKPTSTVKGSLVA        |
| JT0686     | -----GNKVFFD-----ITWEGPVFQ--GKPTSTVKE--QS          |
| CSCK       | -----MS--TVYFD-----VSADGQ-----KL                   |
| NP_986490  | -----MS--KVFFD-----VEADGQ-----PL                   |
| NP_985014  | NSSRSLLPSSRRLFSSSAASLGTKVFFD-----TSINGA-----KA     |
| NP_984799  | -----MSGVTRVYIDIE-----IGG-----CKS                  |
| NP_984183  | -----MTE---RQKTYFD-----LSIG-----GKPA               |
| NP_982586  | -----MSYFGVISAAQAKSVKMYPPNPPISQRVQML---LRYDGGEKQEE |

|           |                                             |         |
|-----------|---------------------------------------------|---------|
| NP_982486 | QVLFVLAQALLCAFALADPTVTHRFFD-----LQHG-----   | DEPL    |
| AAT09096  | FLLSLLAINQPGVAAKCLKPKVTSKVFFD-----VEIG----- | GEKA    |
| YP_014938 | -----MTYPQLSKEVAPNEIEAEMI-----              | TNR     |
| NP_951950 | -----MSEEQNPRVMLE-----                      | TSQ     |
| NP_935388 | ---MLKVICASLVLTSSLALAGPKVEFE-----           | TSL     |
| NP_907765 | PSLFKFLFLGFMLLPAWLWSAESPVVVLE-----          | TTS     |
| 3AC91249  | --KITRAERFNLVQTDGDPGKGTGGFTD-----           | PAT     |
| 3AC90551  | -----KTLPQLTSKAYVKLD-----                   | TTK     |
| 3AC89441  | -----TGKALVELT-----                         | TTQ     |
| 3AC88914  | -----ARADLPSLAGKATVDLN-----                 | TSK     |
| AAV50868  | -----NSGKNPRVYMD-----IVLN-----              | NEII    |
| AAV82698  | IGLTAAIFISVSHAEIQPDNPFPRVKII-----           | TSM     |
| AAV81872  | -----MQVVLH-----                            | TNH     |
| NP_736022 | -----FPQLDKAVAKNEAQVLIK-----                | TSK     |
| NP_734780 | -----ELTFPQVDIENTEGPV-AVIK-----             | TNH     |
| YP_085398 | -----MKTLYILM-----                          | ENG     |
| NP_643098 | -----EHVANIGTLAHERFWDG-----                 | LSIYRSQ |
| NP_641352 | -----MSLIATFD-----                          | TSR     |
| 3AB76758  | -----                                       |         |
| YP_129479 | -----MRILIRLNLYQHSAA SM I FT-----           | TNF     |
| YP_129310 | -----MVT LH-----                            | TTF     |
| YP_129032 | ---MHRYLLAFCLLLALPVTAATQVLVT-----           | TNL     |
| YP_101389 | -----EKETVLK-----                           | IETSM   |
| YP_087816 | -MKKFKFLTALFALFFVFNANAKNVT LH-----          | TNY     |
| YP_087815 | -----MRNQIPIHFYKENTMVT LH-----              | TNF     |
| YP_076496 | ADQAGHKQWDKPPEMI IDPAKRYTATME-----          | TSL     |
| AAT91289  | -----                                       |         |
| AAT91260  | -----                                       |         |
| NP_868477 | FGLTAGPASSTSAADPAKGEVTHKVYFD-----VSIG-----  | SEPA    |
| NP_867717 | -----MKVATFD-----                           | TDR     |
| NP_867158 | PNLVEATVLSGNRSLRLD-----M-----               | DGF     |
| NP_865515 | -----IDRDALPQVLFK-----                      | TTR     |
| NP_992233 | -----MVT FH-----                            | TNH     |
| NP_991569 | LVT FIALCSLSAVAPAALAAGEPHVLLT-----          | TSA     |
| NP_280624 | -----MRRADCRNTMPVDATVH-----                 | TSE     |
| 3AC18575  | EAGEASREVSTPETEDVPATGTVTVNLS-----           | TNQ     |
| 3AC16839  | PQTSETCGRLVGVI VVSMTLKTATAILH-----          | TNR     |
| 3AB82272  | -----MNPIVTIEM-----                         | ATG     |
| 3AB99042  | -----MPATGTVTVNLT-----                      | TAQ     |
| 3AB97427  | -----LDVMMGVMTSKTATAILH-----                | TNR     |
| 3AC08372  | -----YTPPKGYEHLPRLLGRATVEME-----            | TTK     |
| 3AC07690  | -----ATVVLT-----                            | VND     |
| YP_072215 | LVT FIALCSLSAVAPAALAAGEPHVLLT-----          | TSA     |
| YP_069574 | -----MVT FH-----                            | TNH     |
| NP_778719 | -----MHLIAHLD-----                          | TVR     |
| NP_245881 | -----MIT LH-----                            | TNL     |
| NP_245880 | ---MLRIITALLLAGVVCVAQAKNVVLH-----           | TNY     |
| NP_354667 | AFAGALFAGALAASTFASAAE-LLTVQL-----           | KDG     |
| NP_354666 | -----MTEIKDPENTI IMET-----                  | TTG     |
| NP_298502 | -----MHLIAHLD-----                          | TVR     |
| AAAN39296 | -----MA--NPKVFFE-----VSANG-----             | EPL     |
| AAQ24380  | -----MA--LPRVFFD-----ITAGG-----             | QPL     |

|             |                                   |       |
|-------------|-----------------------------------|-------|
| ZP_00353225 | -----                             | ----- |
| ZP_00244808 | -----MTKTIELH-----                | TNH   |
| ZP_00244807 | SRTWAAFALAAVFAAPLTAAAQKURLA-----  | TSE   |
| ZP_00358245 | -----MQIDVSKT--YRVTME-----        | TTR   |
| ZP_00350273 | -----MIKLH-----                   | TNF   |
| ZP_00129494 | -----MSN-----PMVLE-----           | TSS   |
| ZP_00130259 | -----                             | M     |
| ZP_00136576 | LIATCTLLFAGSLLAATPAA-KPHVLIA----- | TSL   |
| NF01760157  | -----MATAVLE-----                 | TNF   |

|           |                                          |                 |
|-----------|------------------------------------------|-----------------|
| CSHUA     | GRVSFEL---FADKVPKTAEN---FRALSTGE-----    | KGFG-----       |
| NP_839944 | GRISIKL---FADKILKTAEN---FRALSTGE-----    | KGFR-----       |
| NP_115861 | GDIKIEVF---CERTPKTCMESRCVPQAG-----       | VQW             |
| NP_570981 | GDIKIEVF---CERTPKTCEN---FLALCA-----      | SNY             |
| NP_057143 | GIIVLELY---WKHAPKTCKN---FAELAR-----      | RGY             |
| CSHUB     | GRVIFGL---FGKTVPKTVDN---FVALATGE-----    | KGFG-----       |
| 366681    | GRIQMLL---RSDVVPMTAEN---FRCLCTHE-----    | KGFG-----       |
| A57545    | GRITMEL---FSNIVPRTAEN---FRALCTGE-----    | KGFG-----       |
| A41581    | GRVVLEL---KADVVPKTAEN---FRALCTGE-----    | KGFG-----       |
| A54204    | GRIVIGL---FGKVVPKTVEN---FVALATGE-----    | KGYG-----       |
| 364705    | GDLNLELH---CDLTPKTCEN---FIRLCK-----      | KHY             |
| 038552    | GDIHTKLF---PVECPKTVEN---FCVHSR-----      | NGY             |
| NP_624311 | GDVVIDLY---TEERPRACLN---FLKLCKIKY-----   |                 |
| 32708309  | GRMKIEL---FADVVPKTAEN---FRQFCTGEFR-----  | KDGVP-----IG    |
| A45981    | GRIVLEL---FADIVPKTAEN---FRALCTGEKG-----  | IGHTTGKP-----LH |
| J40763    | GRVVFELF---SDVCPKTCEN---FRCLCTGEK-----   | GTGKSTQKPLH     |
| A47328    | GRIMFOLF---SDICPKTCKN---FLCLCSGEK-----   | GLGKTTGKKLC     |
| KP_531396 | GRVSFEL---FADKVPKTAEN---FRALSTGE-----    | KGFG-----       |
| KP_525294 | GRVSFNL---FADKIPKTAEN---FHALSTGE-----    | KGFG-----       |
| KP_523512 | -----PDKLPKTAEN---FHALSTGE-----          | KGFG-----       |
| KP_507866 | GRVVLEL---KADVVPKTAEN---FRALCTGE-----    | KGFG-----       |
| KP_517783 | GRVSFEL---FADKFPQIAG-----                |                 |
| KP_517773 | GCVSIKL---FADKIPKTAG-----                |                 |
| KP_526904 | GRVSFKL---LADKFPKTAEN---FRALSTGE-----    | KGFG-----       |
| KP_516556 | GHISFEL---FADKFPKTAEN---FHALSTGE-----    | KRFG-----       |
| KP_526001 | GHIPFEL---FADKIPKTGG-----                |                 |
| KP_516021 | GDIKIEVF---CERTPKTCEN---FLALCA-----      | SNY             |
| KP_515886 | GRVVFELF---SDVCPKTCEN---FRCLCTGEK-----   | GTGKSTQKPLH     |
| KP_525218 | GHAKEIK---MSSDNQGSAD-----                |                 |
| KP_507684 | GRVSFEL---FADKVPKTAEN---FRALSTGE-----    | KGFG-----       |
| KP_524688 | GRMKIEL---FADVVPKTAEN---FRQFCTGEFR-----  | KDGVP-----IG    |
| KP_513346 | GRIQMLL---RSDVVPMTAEN---FRCLCTHE-----    | KGFG-----       |
| KP_524598 | GHVSFKL---SADKFPNTAEN---VHAMSTGE-----    | KGFG-----       |
| KP_515004 | -----TLL---PCATPKTCEN---FIRLCK-----      | KHY             |
| KP_523437 | GRISFEL---FADKFPPTAEN---FHALSTGE-----    | KG-----         |
| KP_520485 | DRVSLEL---FADKFPKTAGN---FHALSTGE-----    | KGFG-----       |
| KP_519076 | GRVSFEL---FADKVPKTAEN---FRALSTGE-----    | KGFG-----       |
| KP_527705 | DHVSFEL---FAEKFPKTAEN---VRALSTEE-----    | KGFG-----       |
| KP_527529 | GDVVIDLY---TEERPRACLN---FLKLCKIKY-----   |                 |
| KP_518678 | DRKFVAFG---QLIEGTEVLK---QLELVPTQNER----- | P               |
| CSMSA     | GRVSFEL---FADKVPKTAEN---FRALSTGE-----    | KGFG-----       |

|            |                                                        |
|------------|--------------------------------------------------------|
| NP_598845  | GRVVLEL---KADVVPKTAEN---FRALCTGE-----KGFG-----         |
| AAH58369   | GVIVLELY---WKHAPKTCKN---FAELAR-----RGY                 |
| A56861     | GRVVFGL---FGKTVPKTVDN---FVALATGE-----KGFG-----         |
| A40047     | GRIVIGL---FGNVVPKTVEN---FVALATGE-----KGYG-----         |
| NKCR_MOUSE | GRIMFQLF---SDICPKTCKN---FLCLCSGEK-----GLGKTTGKKLC      |
| AAH61645   | GDIKIEVF---CERTPKTCEN---FLALCA-----SNY                 |
| 3AC41068   | -DLNLELH---CDLTPKTCEN---FIKLCK-----KQY                 |
| 3AC34686   | GRIVLEL---FADIVPKTAEN---FRALCTGEKG-----TGSTTGKP-----LH |
| 3AB30711   | GDVVIDLY---TEERPRACLN---FLKLCKIKY-----                 |
| 3AB25645   | GRMKIEL---FADVVPKTAEN---FRQFCTGEFR-----KDGVP-----IG    |
| 3AB23880   | GRMKIEL---FADVVPKTAEN---FRQFCTGEFR-----KDGVP-----IG    |
| NF00527760 | GRIIMEL---FSNIVPQTAEN---FRALCTGE-----KGFG-----         |
| NF01138503 | GDIHIKLF---PVECPKTVEN---FCVHSR-----NGY                 |
| NF00510830 | GRIQMLL---RSDVVPMTAEN---FRCLCTHE-----KGFG-----         |
| NF00510932 | GVIVLELY---WKHAPKTCKN---FAELAR-----RGY                 |
| NF01595779 | GPVSFEL---FSDKVQKTAEN---CPALSTGE-----KGFG-----         |
| NF02014914 | GRVSFEL---FADKVPKTAEN---FQALSTGE-----KGFG-----         |
| NF01930249 | GPCLFEL---FADKVPKTAEN---FHSLSPGE-----KGFG-----         |
| NF01929278 | GLVSFKL---FADKVPKTAGN---FRALSTGE-----KGFG-----         |
| NF00523006 | GRVSFEL---FADKVPKTAEN---FRALSTGE-----KGFG-----         |
| NF00508381 | GRVSFEVWLFADKVPKTAEN---FRALSTGE-----KGFG-----          |
| NF01215170 | GDIKIEVF---CERTPRTCEN---FLALCA-----SNY                 |
| CSRTA      | GRVCFEL---FADKVPKTAEN---FRALSTGE-----KGFG-----         |
| NP_783638  | GDIKIEVF---CERTPKTCEN---FLALCA-----SNY                 |
| NF01612782 | GGIVLEL---FADIVPKTAEN---FRALCTGEKG-----TGLTTGKP-----LH |
| NF01612825 | GRIQMLL---RSDVVPMTPEN---FRCLCTHE-----KGFG-----         |
| NF01607941 | GRIVLEL---FADIVPKTAEN---FRALRTGEKG-----TGWTAGKP-----LH |
| NF01607846 | GCVSFKL---FADNVPKTAEN---FHALSTGE-----KGFG-----         |
| NF01609144 | GRIVIGL---FGKVVPRTVEN---FVTLATGE-----KGYG-----         |
| NF01608897 | GRVSLEL---FADKVPRTAEN---FRSLTTGE-----KGFG-----         |
| NP_758443  | GRVVLEL---KADVVPKTAEN---FRALCTGE-----KGFG-----         |
| AAH61971   | GRVTFGL---FGKTVPKTVDN---FVALATGE-----KGFG-----         |
| 32828710   | GRVVFELF---SDVCPKTCEN---FRCLCTGEK-----GTGKSTQKPLH      |
| 338388     | GRIVMELR---SDVVPKTAEN---FRALCTGE-----KGFG-----         |
| AF132148   | GDLTVDLF---ISERPIACLN---FLKLCRLK-----Y                 |
| NP_611113  | GPLNLELF---CDQTPRACDN---FIKHCA-----NGY                 |
| NP_611695  | GRIEIGL---FGKTVPKTVEN---FKELALKP-----QGEG-----         |
| NP_610590  | GDLKIELF---CDACPKACEN---FLALCA-----SDY                 |
| NP_648697  | GRIVMELR---SDVVPKTAEN---FRALCTGE-----KGYG-----         |
| NP_648508  | GDIDIELW---ARECPKACRN---FVQLCLEG-----Y                 |
| NP_648338  | GRMI IELR---KDVVPKTAEN---FRALCTGE-----CGIG-TLGKPLH     |
| NP_476656  | GRITFGLF---GKLAPKTVAN---FRHICLRG-----I-NGTS            |
| NP_523874  | GEITVELY---WKHAPNTRCN---FAELSR-----RGY                 |
| NP_523773  | GRIVMLL---RADVVPKTAEN---FRQLCTHE-----QGYG-----         |
| NP_610224  | GRMIFEL---FADTVPRTAEN---FRQFCTGEYR-----PDGVP-----IG    |
| NP_733246  | GRIVFELF---NDVAPKTAEN---FRALCTGEK-----GFGLITGKKLQ      |
| NP_611935  | GDIHMRLF---FKEVPKTVEN---FCVHAK-----NGY                 |
| EAA03569   | GRIVIELR---ADVVPRTAEN---FRALCTGE-----RGIAPDTGTRLH      |
| EAA03948   | GRIVIGL---FGGTVPKTARN---FKELAEKTT-----KGEK-----        |
| EAA04625   | GRMVFEL---YADVVPKTCEN---FRQFCTGEYK-----KDGVP-----IG    |
| EAA06299   | GRIVIELR---PDVVPKTSN---FRALCTGE-----KGFG-----          |
| EAA08127   | GRIVFELF---PAVAPKTCEN---FRALCTGEK-----GIGQKTGKPLH      |

|              |                                                        |
|--------------|--------------------------------------------------------|
| EAA09839     | GALNLELY---CEQVPKTCEN---FLKHCQ-----SGY                 |
| EAA10133     | GDVHLRLF---GKECPKTVEN---FCVHSK-----NGY                 |
| EAL39647     | GDITVDLF---LKERPRAALN---FLKLCKLK-----Y                 |
| EAA13913     | GDIKIELF---CDDCPKTCEN---FLALCA-----SDY                 |
| EAA13914     | GRITIGMF---GEEAPKTVAN---FRQLCTKD-----V-DGFS            |
| EAA14200     | GRIIMVL---RADVVPKTAEN---FRALCTGE-----QGFG-----         |
| EAA01474     | GRILIEVR---NDVAPKMAKN---FGALCTGELG-----FG              |
| KP_321072    | GRILIEVR---NDVAPKMAKN---FGALCTGELG-----FG              |
| KP_320182    | GELTIELY---WKHAPNTRCN---FAELAR-----RGY                 |
| KP_319131    | GRITIGMF---GEEAPKTVAN---FRQLCTKD-----V-DGFS            |
| KP_311949    | GRIVFELF---PAVAPKTCEN---FRALCTGEK-----GIGQKTGKPLH      |
| CAI11739     | GRLLFELF---SDVCPKTCRN---FKALCTGEAG-----LSKSN---LELS    |
| AAQ91263     | GRIVMELR---ADVVPKTAEN---FRALCTGE-----KGFG-----         |
| NP_001004626 | GRIIIEL---FADVVPKTVAN---FRALCTGE-----HGFG-----         |
| NP_001002065 | GRVVFEL---FADVVPKTAEN---FRALCTGEKG-----VGKSTGKP-----LH |
| NP_957499    | GRMKIEL---FADIVPKTAEN---FRQFCTGEFK-----KDGVP-----VG    |
| AAQ94596     | GRMKIEL---FADIVPKTAEN---FRQFCTGEFK-----KDGVP-----VG    |
| NP_998184    | GRIVIGL---FGKTVPKTTEN---FLQLATGE-----KGFG-----         |
| NP_001002146 | GDMKIELF---CEKAPKSCEN---FLALCA-----GGF                 |
| AAQ91264     | GRVVMELR---ADVVPRTAEN---FRQLCTGO-----PGYG-----         |
| AAH59458     | GRVVMELR---ADVVPRTAEN---FRQLCTGO-----PGYG-----         |
| AAH56814     | GDIVIDLY---TEERP KasLN---FLKLCKIKY-----                |
| AAH62863     | GRVVMELR---TDVVPRTAEN---FRQLCTGO-----PGYG-----         |
| NP_998629    | GRVVIELF---SDVCPKTCEN---FRCLCTGEK-----GVGKTTQKPLH      |
| NP_957285    | GRVSASFTS---TAMAPATNHE---ADAIAD-----DAV                |
| NP_506749    | GRIVMEL---YNDIVPKTAEN---FRALCTGE-----KGVGKSG-KPLH      |
| NP_506561    | GRVTMEL---FNDVVPKTAEN---FRALCTGE-----KGVGEQG-VALH      |
| NP_504522    | GKVI IQMN---EALKKNLTEL---FVKTARGEVHP-----SCG---KKIE    |
| NP_506751    | GRIVMEL---YDDVVPKTAGN---FRALCTGE-----NGIGKSG-KPLH      |
| NP_497745    | GRIEIRLF---VEDAPKTCEN---FRALCTGEV-----GMPNPKARLH       |
| NP_499828    | GRIVMEL---YNDIVPKTAEN---FRALCTGE-----KGGKSG-KKLH       |
| NP_497257    | GKIVIGL---FGEVVPKTVKN---FVELAQRA-----EGEG-----         |
| NP_509506    | GRIVFSLW---NHCCPRTVEN---FRAFCTGE-----LGKMNGHYAS        |
| NP_503034    | GRIVIEL---RTDVTPKTAEN---FRCLCTGE-----RGFG-----         |
| NP_501118    | GKIALELY---WNHAPRTCQN---FSQLAK-----RNY                 |
| NP_496562    | GDIEIELW---TKEAPLACRN---FIQLCMEN-----Y                 |
| NP_495855    | GTIVIEL---FADVTPRTAEN---FRQFCTGEYK-----KDGVP-----NG    |
| NP_496337    | GPLNLELF---APKVPKACEN---FITHCS-----NGY                 |
| NP_495417    | GDIKIELY---VDDAPKACEN---FLALCA-----SDY                 |
| NP_493378    | GDITIRLF---GDECPKTVEN---FCTHSR-----RGY                 |
| NP_492343    | GDLIIDLF---VKERPRCSLN---FLKLCKKK-----Y                 |
| NP_493624    | GRIVIGL---FGKTVPKTATN---FIELAKKP-----KGEK-----         |
| F06073       | GRIVMEL---YTDKTPRTAEN---FRALCTGE-----KGVGGTG-KPLH      |
| NP_175776    | GDIVIDLH---SDKCPLTCKN---FLKLCKIK-----Y                 |
| NP_567029    | GRILIGL---FGNIVPKTAEN---FRSLCTGEKGVG-----N-MGKPLY----- |
| NP_201554    | GDLNIELH---CDIAPRACEN---FITLCE-----RGY                 |
| NP_200679    | GRIVMGL---FGKTVPKTVEN---FRALCTGEKGIG-----K-NGKALH----- |
| NP_181407    | GRIKMEL---FADIAPKTAEN---FRQFCTGELR-----KAGKP-----LG    |
| NP_191166    | GRVVMEL---FADVTPRTANN---FRALCTGE-----NGIGKAG-KALH      |
| NP_171696    | GDIKCEIF---CDEVPKSAEN---FLALCA-----SGY                 |
| NP_195222    | GRIVIGL---YGTVVPKTVEN---FRALCTGEKGT-----S-SGKPLH-----  |
| NP_195213    | GRIEMEL---FADTTPNTAEN---FRALCTGE-----KGMGKLG-KPLH      |

|           |              |                |                       |                   |
|-----------|--------------|----------------|-----------------------|-------------------|
| NP_196816 | GRIVIGL---   | YGDDVPQTVEN--- | FRALCTGE-----         | KGFG-----         |
| NP_188932 | GRIVIELF---  | ADLTPRTAEN---  | FRGLCTGE-----         | RGIG-KCGKPIH      |
| NP_191762 | GRIVMGL---   | FGEVVPKTVEN--- | FRALCTGE-----         | KKYG-----         |
| NP_190046 | GDIHMPLY---  | PEECPKTVEN---  | FTTHCR-----           | -----NGY          |
| NP_180557 | GRVVIGL---   | FGKAVPKTAEN--- | FRALCTGEKGVG-----     | -K-SGKPLH-----    |
| NP_181157 | GPFTVEMY---  | YKHSPRTCEN---  | FLELSR-----           | -----RGY          |
| NP_179251 | GRIVMEL---   | YADTPETAEN---  | FRALCTGE-----         | RGIGKQG-KPLH      |
| NP_179709 | GKIVMEL---   | YTDKTPKTAEN--- | FRALCTGE-----         | KGVGRSG-KPLH      |
| AAK02067  | GRIVIELY---  | DDVVPKTAEN---  | FRLCTGE-----          | KGLGPNTGVPLH      |
| P82869    | -----        | TAGN---        | FAKLVTSG-----         | -----A            |
| P05352    | ETMVFEFL---  | PEVAPKTSN---   | FRALCTGE-----         | KGIGPRSGKPLH      |
| P49181    | QRIVIELF---  | ADVVPKTAEN---  | FRALCTGE-----         | AGVGKSTGKPLH      |
| P05314    | GPIDVELW---  | PKEAPKSVRN---  | FVQLCLEG-----         | -----Y            |
| CSZPA     | GRIVFKL---   | FDDVVPKTAAN--- | FRALCTGE-----         | KGYG-----         |
| E313994   | GKILIELY---  | TEHAPKTCQN---  | FYTLAK-----           | -----EGY          |
| E1335804  | GRVTIGL---   | FGKTVPKTAEN--- | FRALATGE-----         | KGFG-----         |
| E1331567  | GRIKIRL---   | FSSIVPKTAEN--- | FRQFCTGETLG-----      | VNOKP-----IG      |
| 362327    | PTIYFEL---   | FDNVVPKTVKN--- | FASLCNG-----          | FEKDGRC-----LT    |
| 362590    | GEINIELH---  | TDYAPHAVYN---  | FVQLAK-----           | -----QGY          |
| E1294518  | GDISIKLY---  | PEEAPKAVQN---  | FTTHAE-----           | -----NGY          |
| P39728    | GDLVIDLF---  | VKEAPKTCEN---  | FLKLCKLK-----         | -----Y            |
| E1263915  | GDIQIELW---  | CKEVPKACRN---  | FIQLCLEG-----         | -----Y            |
| CSBY      | GRVVFVKL---  | YNDIVPKTAEN--- | FRALCTGE-----         | KGFG-----         |
| 330507    | GRIEFEL---   | YDNVVPKTAEN--- | FRALCTGE-----         | KGWG-----         |
| 312324    | GRIVIGL---   | YGKVCPTAKN---  | FYKLSTTTN-----        | SKKG-----         |
| 357050    | GRIVCKL---   | FREKAPKTEN---  | FYKLCAGDV-----        | KSPLKDQOYLS       |
| 348567    | GRIVFEL---   | YNDIVPKTAEN--- | FLKLCEGNAGM-----      | AKTKPDVP-----LS   |
| CSBYC3    | ADLTFELY---  | GTVVPKTVNN---  | FAMLAHVAVK-----       | IEGKDPNDIHTYS     |
| 363359    | RLITIDLY---  | GTMVPKTVMT---  | FCQYVDSVKDR-----      | LASR-----HSYS     |
| 338324    | GRIVMGL---   | YGLTTPQTVEN--- | FYQLTISR-----         | PKMG-----         |
| PcCyP19   | GRVVFEL---   | FADAVPKTAEN--- | FRALCTGE-----         | KNFG-----         |
| PcCyP20   | GSLLIHLR---  | YTDCPKACFN---  | FLALCA-----           | -----SSY          |
| PcCyP21.1 | GRVVIGL---   | FGNDVPKTVEN--- | FKQLASGE-----         | NGFG-----         |
| PcCyP21.3 | GRVEMEL---   | FKDAVPKTAEN--- | FRALCTGE-----         | KGVGRSG-KALC      |
| PcCyP24.3 | GRVEVELF---  | DDTVPIITARN--- | FRELRCGYQN-----       | -----KTPEG-KPLH   |
| PcCyP26   | GQVTIELF---  | HDTVPKTSN---   | FRSLCTGE-----         | RGFI-QC--PLY      |
| PcCyP28   | GRIKMEL---   | YADTVPKTAEN--- | FRALCTGE-----         | KGRGKSG-KPLH      |
| PcCyP30   | KRIEYELF---  | TRKCPVAVEN---  | FVKLCTGENVLPRVPSTAG-- | MGDPSFGDQFLPQVT   |
| PcCyP35.1 | GRITFELY---  | SXVVPKTCNN---  | FWHLCHGDLG-----       | SVSVPDGESEAQPLELT |
| PcCyP35.3 | LRIEFELFD--- | DESPKACAN---   | FRHLCAQOSTSR-----     | KGQTYCYQGLTPC     |
| PcCyP40   | EKILLELF---  | DDITPKTCAN---  | FRALCTGNE-----        | GKVTDETQIPMT      |
| PcCyP110  | GTIIVRL---   | PHFAPKAVVN---  | FVGLAQ-----           | -----EGF          |
| AAT44353  | GRIVMELE---  | ADVVPKTAEN---  | FRALCTGE-----         | KGFG-----         |
| EAL37431  | GRITMEL---   | FADKVPITAEN--- | FRALCTGE-----         | KGMGQSG-KPLC      |
| EAL37232  | GDLKFELF---  | CSQCPKACKN---  | FLALSA-----           | -----SGY          |
| EAL37110  | SKLRIGLF---  | GVEVPKTANN---  | FYSLCVGGM-----        | -----KDKDG-KEMS   |
| EAL36265  | GDLVIDLN---  | VDLCPKTCEN---  | FLKLCKLK-----         | -----F            |
| EAL35294  | GRLVIEL---   | FQDIVPKTSN---  | FRQFCTGEYK-----       | KNLKS-----VG      |
| J68268    | GRITFEL---   | FADAVPKTAEN--- | FRALCTGE-----         | KGFG-----         |
| J68269    | GRITFEL---   | FADAVPKTAEN--- | FRALCTGE-----         | KGFG-----         |
| AAQ15626  | GRVEMEL---   | FKDVVPKTAEN--- | FRALCTGE-----         | KGLGRSG-KALS      |
| AAB07896  | GRITFEL---   | FADAVPKTAEN--- | FRALCTGE-----         | KGFG-----         |

|            |                |                |                  |                   |
|------------|----------------|----------------|------------------|-------------------|
| AAK14937   | GRVVFEL---     | FSDVVPKTAEN--- | FRALCTGE-----    | KSTP--G-NPLH      |
| CAC18541   | GRIQLEL---     | FADVTPKTAEN--- | FRQLCTGEYR-----  | KDGVV-----TG      |
| A45000     | GRIVFAL---     | FDDVPKTVEN---  | FRALCTGE-----    | KGFG-----         |
| Q9Y0F5     | GDLKFELF---    | CSQCPKACKN---  | FLALSA-----      | -----SGY          |
| J47811     | GRIVMEL---     | FADIVPKTAEN--- | FRCLCTGE-----    | RGMGRSG-KKLH      |
| J50388     | GRIVMEL---     | RSDIVPRTAEN--- | FRALCTGE-----    | RGFG-----         |
| L46884     | GRIIFEL---     | FND-VPDTRN---  | FRELCTHK-----    | NNFG-----         |
| M93420     | GRIVMEL---     | RSDIVPRTAEN--- | FRALCTGD-----    | RGFG-----         |
| J50389     | GRIIIGL---     | FGKTVPKTVEN--- | FKQLSIGTTLK----- | DGRTAA-----       |
| G992633    | ARIIGL---      | FGKTVPKTVEN--- | FKQLSIGTQLK----- | DGRTAS-----       |
| E323073    | GRIVMEL---     | RSDIVPRTAEN--- | FRALCTGE-----    | RGFG-----         |
| 352758     | GRITIGL---     | FGKDAPLTEN---  | FRQLCTGE-----    | HGFG-----         |
| E1203753   | GRVTMEL---     | FKDAVPQTAEN--- | FRALCTGE-----    | KGFG-----         |
| CAB58290   | GALSIELYN----- | NFCADS---      | FWQLARSD-----    | -----Q            |
| CAB58298   | GRIVMEL---     | YADTVPKTAEN--- | FRALCTGE-----    | KGKGRSG-KPLH      |
| AAF69736   | ERVVLELF---    | ADVTPKTCEN---  | FRQLCLGND-----   | GKKVEGTEVPMT      |
| AAD46565   | GRITIGL---     | FGKDAPLTEN---  | FRQLCTGE-----    | HGFG-----         |
| A53522     | GRIILELR---    | EDIAPKTVKN---  | FIGLFD-----      | -----K            |
| NP_702112  | GELEIHLF---    | SNECPEACRN---  | FIQHCLNN-----    | -----Y            |
| NP_701512  | GRVLIGLY---    | SDQVPLSTEN---  | FIQLAEGYQIK----- | DKYIG-----        |
| NP_701389  | GRMIFELF---    | MDKLPITCEN---  | FRCLCTGETG-----  | -----LGYYL-KPRW   |
| NP_701030  | GDIKIELF---    | CYEVPKTCKN---  | FLALCA-----      | -----SGY          |
| NF01067443 | GKVYFELFN--    | DEEIKKSVDN---  | FLSLCKGQ-----    | -----DYHSIYSNDILS |
| NF01067965 | GKFKFEL---     | FQNIVPRTSEN--- | FRKFCCTGEHK----- | -----INNLP-----VG |
| NF01065889 | GDIHISLF---    | YKECKKTVQN---  | FSVHSI-----      | -----NGY          |
| NF00926916 | GRIIFEL---     | FSDITPRTCEN--- | FRALCTGE-----    | K-IGSRG-KNLH      |
| 352760     | GRIVFGLY---    | GKVAPKTVEN---  | FVSICKG-----     | -----TVVDG-KMLH   |
| J10322     | GKFKFEL---     | FQNIVPRTSEN--- | FRKFCCTGEHK----- | -----INNLP-----VG |
| CAB39039   | GRIIFEL---     | FSDITPRTCEN--- | FRALCTGE-----    | K-IGSRG-KNLH      |
| CAD51648   | GEFOVELY---    | WYHSPKTCLN---  | FYTLC-----       | -----MGY          |
| NF01497907 | GRIVFEL---     | FNDITPRTCEN--- | FKSLCVGD-----    | K-VGSRG-KNLH      |
| NF01497552 | GEIHISFF---    | YKECKKTVLN---  | FATHST-----      | -----NGY          |
| NF01497379 | GRIVFGLY---    | GKVAPKTVEN---  | FVSICKG-----     | -----TVVND-KMLN   |
| NF01497199 | GKFKFEL---     | FQNIVPKTSN---  | FRQFCTGEYK-----  | -----VNNLP-----VG |
| NF01496968 | GKVYFELYN--    | DEGIEKSIEN---  | FLSLCKGN-----    | -----EYHSIYSNEMLT |
| NF01495390 | GRVLIGLY---    | SDQVPLSVEN---  | FIQLSEGYKVK----- | DKYIG-----        |
| NF01495324 | GDFEVELY---    | WYHSPKTCLN---  | FYTLC-----       | -----MGF          |
| NF01493974 | -----          | -----          | -----            | -----             |
| NF01493918 | GELEILLF---    | SNECPIACKN---  | FIQLCLNN-----    | -----Y            |
| E316521    | KKIVFKL---     | YDDVVPKTAAN--- | FRELATGS-----    | -----RGFG-----    |
| CAC35733   | GDIIIDLH---    | TQVS-LAAKN---  | FIKLCKSK-----    | -----F            |
| J47812     | GRIVMEL---     | FNDIVPKTAEN--- | FRALCTGE-----    | KGVGKSG-KPLH      |
| J47813     | GRIVMEL---     | FADIVPKTAEN--- | FRCLCTGE-----    | RGVGRSG-KKLH      |
| G2624966   | GRIVMEL---     | FNDIVPKTAEN--- | FRCLCTGEKG-----  | -----NG-----LT    |
| E1317902   | GAINLELY---    | CKDVPRACEN---  | FIKHCK-----      | -----NGY          |
| E1319851   | GAINLELF---    | CKDAPRACEN---  | FIKHCK-----      | -----NGY          |
| G3057040   | GVINLELF---    | CKDAPRACGN---  | FIKHCK-----      | -----NGY          |
| AAB81959   | GRVSFEL---     | FADKVPKTAEN--- | FRALSTGE-----    | KGFG-----         |
| AF023860   | GRVSFEL---     | FADKVPKTAEN--- | FRALSTGE-----    | KGFG-----         |
| AAB81961   | GRVSFEL---     | FADKVPKTAEN--- | FRALSTGE-----    | KGFG-----         |
| AAF22215   | GRVSFEL---     | FADKVPKTAEN--- | FRALSTGE-----    | KGFG-----         |
| AF243140_1 | GRVSFEL---     | FADKVPKTAEN--- | FRALSTGE-----    | KGFG-----         |



|            |             |                |                 |                 |           |
|------------|-------------|----------------|-----------------|-----------------|-----------|
| AF252388   | GRVVLEL---  | KADVVPKTAEN--- | FRALCTGE-----   | KGFG-----       |           |
| CSBOAB     | GRVSFEL---  | FADKVPKTAEN--- | FRALSTGE-----   | KGFG-----       |           |
| NF01922219 | KRIEIEL---  | FADVPETAEN---  | FRQLCTGE-----   | AGFG-----       |           |
| NF01725587 | GRIMMELR--- | GDVVPKTAEN---  | FRALCTGE-----   | KGFG-----       |           |
| NF01897292 | GTVDIGLF--- | GDQVPKTVKN---  | FETLCGDGF-----  | KREGDEQ-VYSY    |           |
| CSHYAC     | GRVSFEL---  | FADKVPKTAEN--- | FRALSTGE-----   | KGFG-----       |           |
| NF00071027 | GRVSFEL---  | FADKVPKTAEN--- | FRALSTGE-----   | KGFG-----       |           |
| NF01951405 | GDLNLELH--- | CDMTPRTCEN---  | FIKLCK-----     | KNY             |           |
| NF01059378 | GRVSFEL---  | FADKVPKTAEN--- | FRALSTGE-----   | KGFG-----       |           |
| NF01105745 | GRITFEL---  | FADKVPKTAEN--- | FRALCTGE-----   | KGVGRSG-KPLH    |           |
| NF00495096 | GRVSFEL---  | FADKVPKTAEN--- | FRALSTGE-----   | KGFG-----       |           |
| NF01053198 | GRIVMEL---  | YADTTPRTAEN--- | FRALCTGE-----   | KGNGRSG-KPLH    |           |
| CSPGA      | GRVSFEL---  | FADKVPKTAEN--- | FRALSTGE-----   | KGFG-----       |           |
| NF01950932 | GDIKIELF--- | CERTPKTCEN---  | FLALCA-----     | SNY             |           |
| NF01951326 | GRIVFEL---  | FADIVPKTAEN--- | FRALCTGEKG----- | TGATTGKP-----LH |           |
| NF00909389 | GRIVMEL---  | YADVTPRTAEN--- | FRALCTGE-----   | KGVGRSG-KPLH    |           |
| NF01286555 | GRIVMEL---  | FADTTPRTAEN--- | FRALCTGE-----   | KGKVRSG-KPLH    |           |
| NF01737225 | GRIVMEL---  | YADTTPETAEN--- | FRALCTGE-----   | KGMGKSG-KPLH    |           |
| NF01590839 | GLIVLKLK--- | YKETPLTVCN---  | FVGLAEG-----    | TLDAAK-GKPF     |           |
| AAH51602   | GTITVELY--- | WLHAPVTCKN---  | FAELAR-----     | RGY             |           |
| AAT69672   | GRIVMELR--- | SDVVPKTAEN---  | FRALCTHD-----   | KGFG-----       |           |
| AAH54186   | GRIVMELR--- | SDVVPKTAEN---  | FRALCTHD-----   | KGFG-----       |           |
| AAH54168   | GRIVIGL---  | FGKTVPKTVEN--- | FVTLATGE-----   | KGYG-----       |           |
| NF01208049 | GDLNLELY--- | CDKTPKTCEN---  | FIKLCK-----     | KNY             |           |
| NF01844632 | GRVVFELF--- | SDVCPKTCEN---  | FRSLCTGER-----  | GIGKSTQKPLH     |           |
| NF01844615 | GEIDIELW--- | SKEAPKACRN---  | FVQLCLEG-----   | Y               |           |
| NF01915773 | GTITVELY--- | WLHAPMTCKN---  | FAELAR-----     | RGY             |           |
| NF01915657 | GEIKIELF--- | CERAPKASEN---  | FLALCA-----     | SNY             |           |
| NF01557564 | GRIVLEL---  | FADVVPKTAEN--- | FRALSTGEKG----- | IGQSTGKP-----LH |           |
| AAH41536   | GRIIMELR--- | SDVVPRTAEN---  | FRALCTHE-----   | KGYG-----       |           |
| AAH85963   | GRVVFELF--- | SDVCPKTCEN---  | FRCLCTGEK-----  | GTGKSTQKPLH     |           |
| AAH64250   | GRMKVEL---  | FADIVPKTAEN--- | FRQFCTGEFR----- | KDGVV-----IG    |           |
| AAH61335   | GRIVLEL---  | FADVVPKTAEN--- | FRALSTGEKG----- | IGQSTGKP-----LH |           |
| AAH59741   | GRIIMELR--- | SDVVPKTAEN---  | FRALCTNE-----   | KGFG-----       |           |
| AAH67931   | GRVVFELF--- | SDVCPKTCEN---  | FRSLCTGER-----  | GIGKSTQKPLH     |           |
| AAH44993   | GDLNLELY--- | CDKTPKTCEN---  | FIKLCK-----     | KNY             |           |
| A40516     | GRVVIGL---  | FGKTVPKTVEN--- | FVALATGE-----   | KGFG-----       |           |
| CYPB_BOVIN | GRVVIGL---  | FGKTVPKTVDN--- | FVALATGE-----   | KGFG-----       |           |
| AAR19276   | GRITLEL---  | FADTVPKTAEN--- | FRVLSTGE-----   | KGFG-----       |           |
| A46579     | GRIVLEL---  | FADIVPKTAEN--- | FRALCTGEKG----- | IGPTTGKP-----LH |           |
| AAV40687   | GRVAFRL---  | YSDLVPKTAEN--- | FRALCTGEKG----- | LGQSGKP-----LW  |           |
| NF01637248 | GRIVFKL---  | FDDVVPKTAEN--- | FRELATGQ-----   | NGFG-----       |           |
| CYPR_BOVIN | GRITMEL---  | FSNIVPKTAEN--- | FRALCTGE-----   | KGFG-----       |           |
| CYPR_CALVI | GRIVFGLF--- | GKRAPKTVTN---  | FRHICLRG-----   | I-NGTT          |           |
| E1317906   | GPNLELY---  | CQKAPKACEN---  | FITHCT-----     | NGY             |           |
| AAB87888   | GRIIMELR--- | SDVVPKTAEN---  | FRALCTGE-----   | KGFG-----       |           |
| AAB87889   | GRIIMELR--- | SDVVPKTAEN---  | FRALCTGE-----   | KGFG-----       |           |
| Q9XZZ5     | GRIIMELR--- | SDVVPKTAEN---  | FRALSTGE-----   | KGFG-----       |           |
| 363995     | GRIVMELR--- | SDVVPKTAEN---  | FRALCTGE-----   | KGFG-----       |           |
| 31703696   | GRIVMELR--- | ADVVPKTAEN---  | FRALCTGE-----   | KGFG-----       |           |
| J36797     | ---         | MELD---        | ADVVPKTAEN---   | FRALCTGE-----   | KGFG----- |
| AF017738   | GDIDIELW--- | SKECPLACRN---  | FIQLCMEG-----   | Y               |           |

|            |                                                        |
|------------|--------------------------------------------------------|
| L37292     | GRIVMELY---NDIAPRTCNN---FLMLCTGMA-----GTGKISGKPLH      |
| AAS01736   | GRIVMEL---FADVVPRTAEN---FRALCTGE-----KGVGRLG-KPLH      |
| AA061985   | KNIIWNLV---WGEFFGGLGIS-YIFLKLANSF-----QA               |
| CAC80550   | GRIVMEL---FADTTPRTAEN---FRALCTGE-----KGVGRSG-KPLH      |
| AA063777   | GRIVMEL---FADTTPRTAEN---FRALCTGE-----KGVVRSR-KPLH      |
| 353522     | GRIEFEL---FADVVPKTAEN---FRALCTGE-----KGTGRSG-KPLY      |
| E280557    | GRIVFGLF---ADLCPYTVRN---FASLVLGNT-----TNSDG-ILLA       |
| J70827     | GRIVMELY---NDIAPRTCNN---FLMLCTGMA-----GIGKISGKPLH      |
| J70884     | GRIVMELY---NDIAPRTCNN---FLMLCTGMA-----GIGKLSGKPLH      |
| J55771     | ETLVVGLY---GDLVPKTVNN---FVSLCEG-----TKIGD-KHYS         |
| 01024669   | GRIEIGL---FGKTVPKTVKN---FVETATKHLTEK-----SEDDKLVG----- |
| 227879     | GKVVMEL---YANTVPKTAEN---FRALCTGE-----KGIGKSG-KPLS      |
| AAD48910   | GRIVFGL---YGKTVPKTVEN---FRALCTGEKGLG-----T-SGKPLH----- |
| AA051811   | GRIKIEL---FADIVPKTAEN---FRQFCTGEHR-----VAGLP-----IG    |
| AAF76472   | GDIKCEIF---CDEVPKSAEN---FLALCA-----SGY                 |
| AAP80861   | GRVVMGL---FGKAVPKTAEN---FRALCTGEKGMG-----N-SGKPLH----- |
| AAP73848   | GRIKMEL---FADIVPKTAEN---FRQFCTGEHR-----KSGLP-----QG    |
| 3AB62329   | GAFTIEMY---YKHAPKTCRN---FLELSR-----RGY                 |
| AAAL75728  | GRVVIELL---ADKVPDTAEN---FRRLCTGERAGR-----SGKS-----RLH  |
| 348017     | GRIVMEL---YAKDVPRTAEN---FRALCTGE-----KGVGKSG-KPLH      |
| 348018     | GRVVMEL---FADTVPKTAEN---FRCLCTGE-----KGLGASG-KPLH      |
| 3AD53622   | GRVVMGL---FGKTVPKTAEN---FRALCTGEKGTG-----K-SGKALH----- |
| 3AD53621   | GRVVMGL---FGKTVPKTAEN---FRALCTGEKGTG-----K-SGKALH----- |
| 3AD53620   | GRIVMGL---FGNTVPKTAEN---FRAICTGEKGLG-----K-SGKPLS----- |
| KP_507188  | GRVIFGLY---GRLPLTTAN---FKAACSTA-----A                  |
| KP_483750  | GDIHLRLY---PEECPKTVEN---FTTHCR-----NGY                 |
| KP_483749  | GPAPVPPR---PRKKRPLQFEQ---AFLDALPSA-----AM              |
| KP_482125  | CVFRIVLD---GYNAPVTAGN---FLDLVERK-----F                 |
| KP_478742  | ATIQQVID---GYSAPLTAGN---FAKLVLDG-----A                 |
| KP_478741  | ATIQQVID---GYSAPLTAGN---FAKLVLDG-----A                 |
| NP_385690  | -RVVIELR---PDVAPGHVAR---IKELTREG-----A                 |
| NP_385689  | -PVVIELR---PDIAPKHVQQ---IKELAAAG-----E                 |
| NP_349373  | NKIKIELY---PHIAPNTVSN---FISLIN-----HNF                 |
| 3AD45990   | GDIEVDLH---TDMCPLTTKN---FLKLCKGNEGL-----V              |
| 3AD45991   | GDIEVDLH---TDMCPLTTKN---FLKLCKMK-----Y                 |
| NP_908419  | GRITIGLF---GDAAPAGASR---FLSLVTGVG-----                 |
| NP_919903  | PETTYEAK---KIVCPLGLEVH---KIHACPND-----CIL              |
| 3AD35839   | GRIVIELY---ASVVPRTAEN---FRALCTGE-----KGVGAVTGKHLH      |
| AAU87301   | GRIVMEL---YADVVPKTAEN---FRALCTGE-----KGTGRSG-KPLH      |
| CAG90469   | GRITIGL---FGTVVPKTAEN---FRQLAISTD-----PKFG-----        |
| CAG88330   | GRVTFKL---YDDVVPKTAEN---FRALCTGE-----KFG-----          |
| CAG88054   | GNIVIDLF---IDQQPLACYN---FLKLCKLN-----Y                 |
| CAG86818   | GDIKLLKF---NELVPKTEN---FIKLCE-----KGY                  |
| NF01109982 | GKIVMELR---KDVVPKTAEN---FRALCTGE-----KGYG-----         |
| NF00686348 | GRVVIQLR---PDKAPKSVER---IKILVREG-----F                 |
| NF00686217 | -----                                                  |
| NF02138644 | GRIVMEL---FADSTPKTAEN---FRALCTGE-----KGIGLSG-KPLH      |
| NF00926921 | GRIVMGL---YGKTVPKTAEN---FRALATGE-----KFG-----          |
| NF00909931 | GKIVFEL---FADTTPRTAEN---FRALCTGE-----KGVGRSG-KPLH      |
| NF00956595 | GRLRFL---RADIVPMTAEN---FRCLCTHE-----KFG-----           |
| NF02035209 | GRIVMEL---FADVTPNTAEN---FRALCTGE-----KEPGRSG-KPLH      |
| NF01329591 | GNIEIELF---NDKAPVSAKN---FENYVK-----SNF                 |

CAG86678 GPLKFELR-LSSIAQCKHVEN---FLRHCANG-----T  
CAG86274 GEIHAGLF---GYTVPFTVNN---FIQLAN-----KTNG----YGY  
CAG85447 GPIEIELW---AKEVFNITRV---FIONCLDK-----K  
CAG85287 SPIKFEL---YDEVVPKTTEN---FRALCTGE-----KGFG-----  
CAG84900 GRVVFEL---YNDVVPKTAEN---FRALCTGEKGA-----SESS-GKQ-----LH  
CAG84822 GRIVVEL---FDDLAPKTSN---FIKLCNGS-----QITKEGSPLT  
CAG84723 GRIKCLKL---FASELPKTCEN---FRQFCTGEYR-----ENNRP-----KG  
CAG79895 GKIVMGL---YGDVVPKTVEN---FRALCTGE-----TGKG-----  
CAG78939 GQINLELY---PYNAPLTVYN---FVKLAQ-----KGY  
CAG82238 GKIYFEL---FADKVPKTAEN---FRALCTGEKGA-----NTQAGIP-----LH  
CAG81980 GRIEFKL---YNDIVPKTAEN---FRALCTGE-----QGFQ-----  
CAG81971 GKISFKL---YKDQVPKTAEN---FRALCTGE-----KGFG-----  
CAG81844 GRIKFKL---YSEDLPKTCEN---FRQFCTGEYR-----IDNVP-----QG  
CAG84141 GPIEAELF---AKEVPLACTR---FLQLCKSG-----Y  
CAG84091 GRVVFEL---FDD-TPLTSAN---FRALCKGD-----KPTPEGSVPLT  
CAG83821 GRKRLFEL---FPDRAPQACKN---FVGLCAAPDG-----  
CAG76968 GNIELSLD---NQKAPISVKN---FVEYVN-----NGF  
CAG62671 GRIVCEL---YNDKAPKAVEN---FHRLCVG-----SGSVGGIHLT  
CAG76052 GDIVINTF---ADKAPVTVEN---FLNYCR-----SGF  
CAG59915 GRIEFEL---YDDVVPKTAEN---FRALCTGE-----KGWG-----  
CAG58658 GRVVFQ---YDDVVPKTAAN---FRALCTGE-----KGFG-----  
33777556 GRIVMEL---RPDVVPKTAEN---FRALCTGE-----KGFG-----  
AAF65770 GRIVMEL---YADTPRTAEN---FRALCTGE-----KGVGRSR-KPLH  
3AA25755 GRIIFEL---FADVTPRTAEN---FRALCTGE-----KGVGRSG-KPLH  
CSTO GRVVMEL---YADTPKTAEN---FRALCTGE-----KGVGKMG-KPLH  
CSRFP GRIVMEL---YADTVPETAEN---FRALCTGE-----RGIGKSG-KPLH  
CSZM GRIVMEL---YANVVPKTAEN---FRALCTGE-----KGVGKSG-KPLH  
CYPH\_ALLCE ---MEL---FQDVVPQTAEN---FRALCTGE-----KGMGDR--KPLH  
AAG01536 GRVVMEM---FANDVPKTAEN---FRALCTGE-----KGVGRMG-KPLH  
AAB51386 GRVVMEL---FADTPKTAEN---FRALCTGE-----KGVGKMG-KPLH  
354833 GRIVFEL---YADVTPRTAEN---FRALCTGE-----KGVGRSG-KPVH  
K85185 GRIVMEL---FADTPRTAEN---FRALCTGE-----KGTGRSG-KPLH  
Y08273 GRIVMEL---YADVVPKTAEN---FRALCTGE-----KGVGKSG-KPLH  
Y08320 GRIVMEL---YADVVPKTAEN---FRALCTGE-----KGVGKTG-KPLH  
E1226445 GRIVMEL---YADTPRTAEN---FRALCTGE-----KGVGRSG-KPLH  
L32095 GRIVIGL---FGDAVPKTVEN---FKTLSTGA-----KGYG-----  
CAA10766 GRIKMEL---FADIVPRTAEN---FRQFCTGEYR-----KAGIP-----IG  
AAF69796 GRITFKL---FDDVVPKTAEN---FRELCTGQ-----NGFG-----  
AAF69795 GRITFKL---FDDVVPKTAQN---FRELCTGQ-----NGFG-----  
CSNCM GRINFTL---YDDVVPKTAEN---FKELCTGQ-----NGFG-----  
NF01287451 GDIVIDLL---VDYAPKMCEN---FLKLCKVK-----Y  
NF01527836 GDLKIEIF---CESVPKTAEN---FLALCA-----SGY  
NF01488902 GTFTLELY---TNHAPKTCKN---FATLAD-----RGY  
NF00648058 GRIVFEL---YNDIVPKTAEN---FRALCTGEKGA-----VGKLGKP-----LH  
NF01487278 GRIVMGL---YGKTVPKTAEN---FRALATGE-----KGFG-----  
NF01486260 GDIHIRLF---PDAAPKAVEN---FVTHAK-----RGY  
NF00904102 GRIVMGL---YGKTVPKTAEN---FRALATGE-----KGFG-----  
NF01484914 GDIVIDLL---VDYAPKMCEN---FLKLCKVK-----Y  
NF01484255 GRITFEL---FKDVVPRTAEN---FRQFCTGESKN-----NLGRP-----QG  
NF01483993 GEIAVELF---AKQTPPLTCRN---FLQLALDG-----Y  
NF01533203 GRIVMEL---FADVVPRTTEN---FRALCTGE-----KGVGRSG-KPLH  
NF01483647 GPLTLELL---PEFAPKAVWN---FLRLSE-----KGY

|            |              |                             |                   |                 |
|------------|--------------|-----------------------------|-------------------|-----------------|
| 371849     | GRINFKL---   | YDDVVPKTAEN---              | FRALCTGE-----     | KGFG-----       |
| J17900     | GRIVLGL---   | YGEVVPKTVEN---              | FRALATGE-----     | KGYG-----       |
| NF00873669 | GTIKFKL---   | FDDVVPKTAAN---              | FRALCTGE-----     | KGFG-----       |
| NF01527595 | DPIKFKL---   | FDDVVPKTTAN---              | FRALCTGE-----     | KGFG-----       |
| NF01539217 | GRITFNL---   | YDDVVPKTAEN---              | FRALCTGE-----     | KGFG-----       |
| 01035365   | GRIVMGL---   | YGKTVPKTAEN---              | FRALATGE-----     | KGFG-----       |
| YP_116397  | GPIVLELD---  | DAKAPETVRN---               | FVDYVN-----       | SGH-----        |
| YP_119877  | GPLGLTLN---  | NAESPCTVNS---               | FVSLAT-----       | QGF-----        |
| CAD25897   | GRITFELY---  | WDITPKTARNFYEFVKGTEIGG----- |                   | KYYK-----       |
| CAD26352   | GRIVMKL---   | EDDIVPKTAKN---              | FRTLCPERP-----    | KGEG-----       |
| AAD17998   | GRIVLGL---   | YGKTVPETAEN---              | FRALATGE-----     | KGFG-----       |
| 32959712   | GRIEMEL---   | YADDVPKTAEN---              | FRALCTGE-----     | KGVGRSG-KPLH    |
| CSNCC      | GRINFTL---   | YDDVVPKTARN---              | FKELCTGQ-----     | NGFG-----       |
| AJ006689   | GRIVFNL---   | FDKDVPKTAKN---              | FRELCKRP-----     | AGEG-----       |
| AAF28343   | GDITLELY---  | YNHAPKACKN---               | FYELSK-----       | RGY-----        |
| AAD50375   | GRVVFEL---   | YNDIVPKTAEN---              | FRALCTGEGK-----   | IGKSGKP-----LH  |
| AAK21908   | -----        | VVPKTAEN---                 | FRALCTGE-----     | KGVGRSG-KPLW    |
| AAG13968   | KRVEFKL---   | YDDVVPKTADN---              | FRRLCVGE-----     | PGVGG-----      |
| 3AB58884   | KRVEFKL---   | YDDVVPKTADN---              | FRRLCVGE-----     | PGVGG-----      |
| 31363908   | GTIKFKL---   | FDDVVPKTAAN---              | FRALCTGE-----     | KGFG-----       |
| AAD16142   | GRVVFNL---   | FEKDVPKTAKN---              | FRELCKLP-----     | QOQG-----       |
| 31764137   | GRIVFEL---   | YDDVVPRTTNN---              | FRQLCLNP-----     | PGKG-----       |
| 232674     | STSSCTM---   | TSSPRPRTSA---               | LSAPARRA-----     | SATR-----       |
| JT0686     | GRINFNL---   | FNEQVPKTAEN---              | FKALCTGE-----     | KGFG-----       |
| CSCK       | GKITFKL---   | YDDVVPKTAEN---              | FRALCTGE-----     | KGFG-----       |
| NP_986490  | GRIVFQL---   | YNDVTPKTAEN---              | FRALCTGE-----     | KGFG-----       |
| NP_985014  | GRIEFEL---   | YDDVVPKTAEN---              | FRALCTGE-----     | KGWG-----       |
| NP_984799  | GRIVFEL---   | FQDKAPLSAQN---              | FKQLCCG-----      | GIELDGKHVS      |
| NP_984183  | GRVVFV---    | YSDVTPKTAEN---              | FVRLCAGDAGE-----  | CRTKPGVP-----LC |
| NP_982586  | LEIGIELY---  | GSVVPDTVKN---               | FREIAKGVKAK-----  | IKGTD--QVLDIT   |
| NP_982486  | GRVVLGL---   | FGDVAPRTVAN---              | FVTLAKSQD-----    | ASAG-----       |
| AAT09096   | GRIVMGL---   | YGKTVPKTAEN---              | FRALCTGEGGTG----- | K-SGKPLH-----   |
| YP_014938  | GTIRIKLF---  | PEIAPKTVEN---               | FVTHSK-----       | NGY-----        |
| NP_951950  | GNITIELF---  | RDKAPISARN---               | FLSYVK-----       | DGY-----        |
| NP_935388  | GNFTVELN---  | EEKAPISVEN---               | FVKYVK-----       | DGS-----        |
| NP_907765  | GTELTLF---   | PKAAPKAVEN---               | FTTHVK-----       | NGY-----        |
| 3AC91249   | GKLRTIP---   | MEVRPARKEAEITASQVIQRR-----  |                   | VD-----         |
| 3AC90551   | GAIVLELD---  | GNAPVSAGN---                | FLDLVKKR-----     | F-----          |
| 3AC89441   | GPITIVLD---  | GDRAPINAGN---               | FIDLVOQG-----     | V-----          |
| 3AC88914   | GRILLEVD---  | GDNAPLSAGN---               | FVDLVKRG-----     | F-----          |
| AAV50868   | GRLQIKLFR--- | D-AFPAGVEN---               | FVQLTNGK-----     | TYR-VNSNGTGK    |
| AAV82698   | GNITVELN---  | RDAAPLTVKN---               | FFRYVK-----       | KAQ-----        |
| AAV81872   | GDITLEMH---  | NETAPKTVDN---               | FLQYAR-----       | DGF-----        |
| NP_736022  | GDINIKLF---  | PKYAPLAVEN---               | FLTHAK-----       | EGY-----        |
| NP_734780  | GDMTVKLF---  | PDHAPKTVAN---               | FIGLAK-----       | QGY-----        |
| YP_085398  | EKIDLEFF---  | PEEAPKTVEN---               | FKKLAE-----       | QGF-----        |
| NP_643098  | DNFVVQFGD--- | PDGETPAKAKS-----            | LGSAK-----        | T-----          |
| NP_641352  | GPIVVELY---  | PKAPLTVAN---                | FVNLAKE-----      | R-G--F          |
| 3AB76758   | -DLTVVVD---  | GYSAPVTAGN---               | FVDLVKRG-----     | F-----          |
| YP_129479  | GDIEIELD---  | MKQTPVSSRN---               | FLKYCQ-----       | DGF-----        |
| YP_129310  | GDIKIQLN---  | TEKAPETCAN---               | FLQYCR-----       | DGF-----        |
| YP_129032  | GEFTIQLN---  | EEKAPISSEN---               | FLRYVE-----       | DGS-----        |

YP\_101389 GDIKVKLY---NETPKHRDN---FIKLAKDG-----T  
 YP\_087816 GDIKIALN---EKKAPVSSKN---FLDYAQ-----TGF  
 YP\_087815 GDIKIALN---HEKAPETAAN---FEAYCK-----EGF  
 YP\_076496 GTMTFELF---ADEVPQTVNN---FVFLAR-----EGF  
 AAT91289 GRIVFRL---YDQQVPITTKN---FRELATGO-----NGFG  
 AAT91260 GRIVFRL---YDQQVPITTKN---FRELATGO-----NGFG  
 NP\_868477 GRIVLGL---FGKDVPKTAEN---FRALSTGEKGEK---K-LGVPLD-----  
 NP\_867717 GTIRIELF---DDKTPKTVEN---FETLCE-----K-K--Y  
 NP\_867158 GDMVFELF---EQRAARPTER---VIDLAN-----SGF  
 NP\_865515 GDVLIELY---SGEAPSTVAN---FINLVEDG-----F  
 NP\_992233 GDIVINTF---ADKAPATVEN---FLNYCR-----KGF  
 NP\_991569 GNIELELN---SQKAPISTQN---FVDYVN-----NGY  
 NP\_280624 GEFDIELY---DERAPRTVEN---FLNLARHEPAADADPAPDTVTVWEDPESGEIR-GDSL  
 3AC18575 GEIGMELD---RSVSPCTVNA---IEHFAA-----EGY  
 3AC16839 GDISIDLF---GNHAPETVAN---FIGLA-----EGTKEYKTANASGSQ-EGPF  
 3AB82272 EKIKIELY---PEIAPNTVRN---FVSLVK-----KGF  
 3AB99042 GNIGMELD---RSVSPCTVNA---VEHMAS-----EGY  
 3AB97427 GDITIDLF---GNHAPETVAN---FVGLA-----QGTKDYQSANAQGDS-EGPF  
 3AC08372 GKLTIIVVD---GYSAPLTAGN---FVDLVQRH-----F  
 3AC07690 RPITIQVK---GDAAPITAGN---FVDLVNRG-----V  
 YP\_072215 GNIELELN---SQKAPISTQN---FVDYVN-----NGY  
 YP\_069574 GDIVINTF---ADKAPATVEN---FLNYCR-----KGF  
 NP\_778719 GPIKINLF---ADKTPLTVAN---FVNLAKE-----R-G--F  
 NP\_245881 GNIKIQLD---HEKAPNTAQN---FVNYCK-----SGF  
 NP\_245880 GDIKMVLE---EEKAPISTQN---FLRYSQ-----AGF  
 NP\_354667 -PVVIELM---PQVAPKHVAQ---IEALAKKG-----A  
 NP\_354666 -KVVIQLL---PEVAPGHVAR---IKELVSEG-----A  
 NP\_298502 GPIKINLF---ADKAPLTVAN---FVNLTKE-----R-G--F  
 AAN39296 GKIVMELR---KDVVPKTAEN---FRALCTGE-----KGYG-----  
 AAQ24380 GRVVMELR---ADVAPKTAEN---FRALCTGE-----KSMG-----  
 ZP\_00353225 -----MAN---FVGLA-----EGTKEWQDPATGEKK-SQPF  
 ZP\_00244808 GVIRAELE---EVKAPATVAN---FLSYVK-----AGH  
 ZP\_00244807 GDIVLQLD---PAKAPKTVDN---FVAYVK-----SGH  
 ZP\_00358245 GTIELDLY---PQHAPLTVNN---FVFLVR-----E-G--F  
 ZP\_00350273 GEITLELD---EEKAPVTTAN---FIQYVK-----DGF  
 ZP\_00129494 GDMLIELY---ADKAPETVKN---FLRYVE-----EGF  
 ZP\_00130259 GDFVVELD---AEKAPATCEN---FLQYVR-----DGF  
 ZP\_00136576 GEIEVELD---PTKAPISVKN---FLEYVD-----SGY  
 NF01760157 GNIEIELF---EDDMPVTAGN---FRKLVE-----SGF

3SHUA YKGS CFHRIIPGF-----MCQGGDFTRHNGT-----  
 NP\_839944 YKGS CFHRIIPGF-----MCQGGDFTRHNGT-----  
 NP\_115861 RDLGSLQPPPPGF---K--QVFLSLP-RTG-----  
 NP\_570981 YNGCIFHRNIKGF-----MVQTDGPT-GTG-----  
 NP\_057143 YNGTKFHRIKDF-----MIQGGDPT-GTG-----  
 3SHUB YKNSKFHRVIKDF-----MIQGGDFTRGDGT-----  
 366681 FKGS SFHRIIPQF-----MCQGGDFTNHNGT-----  
 A57545 FKNSIFHRVIPDF-----VCQGGDITKHDGT-----  
 A41581 YKGSTFHRVIPSF-----MCQAGDFTNHNGT-----  
 A54204 YKGS KFHRVIKDF-----MIQGGDITTDGDT-----  
 364705 YDGTIFHRSIRNF-----VIQGGDPT-GTG-----

D38552 YNGHTFHRIIKGF-----MIQTDGPT-GTG-----  
NP\_624311 YNYCLIHN-----VQR-DFIIQTDGPTGTGR-----  
G2708309 YKGSTFHRVIKDF-----MIQGGDFVNGDGT-----  
A45981 FKGCPFHRIIKKF-----MIQGGDFSNQNGT-----  
J40763 YKSCLFHRVVKDF-----MVQGGDFSEGNGR-----  
A47328 YKGSTFHRVVKNF-----MIQGGDFSEGNGK-----  
KP\_531396 YKGSCFHRIIPGF-----MCQGGDFTCHNGT-----  
KP\_525294 FKGFCFHRIIPGF-----MYQGGDFTRHNGT-----  
KP\_523512 YKGSCFHRIIPGF-----MCQGGDFTCHNGT-----  
KP\_507866 YKGSTFHRVIPSF-----MCQAGDFTNHNGT-----  
KP\_517783 -----FHRIIPGF-----MYQGGDCTQHNGT-----  
KP\_517773 -----FHRIIPRF-----MCQGGDFTHHNGT-----  
KP\_526904 YKCSCLHRIIPGF-----ICQGGDFTRHNGT-----  
KP\_516556 CKGSCFHRIIPGF-----VCQGGDFTCHNGT-----  
KP\_526001 -----NFTSHNGT-----  
KP\_516021 YNGCIFHRNIKGF-----MVQTDGPT-GTG-----  
KP\_515886 YKSCLFHRVVKDF-----MVQGGDFSEGNGR-----  
KP\_525218 -----EIIPGS-----LCQGGDFTRHKGT-----  
KP\_507684 YKGSCFHRIIPGF-----MCQGGDFTRRNGT-----  
KP\_524688 YKGSTFHRVIKDF-----MIQGGDFVNGDGT-----  
KP\_513346 FKGSSFHRIIPQF-----MCQGGDFTNHNGT-----  
KP\_524598 YKGSCFHRIIPGF-----MCRGGDFTHHNDT-----  
KP\_515004 YDGTIFHRSIRNF-----VIQGGDPT-GTG-----  
KP\_523437 -----  
KP\_520485 YKGSCFHKIIPGF-----MCQGGDFTHHNGT-----  
KP\_519076 YKGSCFHRIIPGF-----MCQGGDFTRHNGT-----  
KP\_527705 YKGPCFHRIIPAF-----MCQGGDFTHHNGT-----  
KP\_527529 YNYCLIHN-----VQR-DFIIQTDGPTGTGR-----  
KP\_518678 IHMCRI TDSGDPYAVQR-DFIIQTDGPTGTGR-----  
CSMSA YKGSSFHRIIPGF-----MCQGGDFTRHNGT-----  
NP\_598845 YKGSTFHRVIPAF-----MCQAGDFTNHNGT-----  
AAH58369 YNGTKFHRIIKDF-----MIQGGDPT-GTG-----  
A56861 YKNSKFHRVIKDF-----MIQGGDFTRGDGT-----  
A40047 YKGSIFHRVIKDF-----MIQGGDFTARDGT-----  
NKCR\_MOUSE YKGSTFHRVVKNF-----MIQGGDFSEGNGK-----  
AAH61645 YNGCVFHRNIKGF-----MVQTDGPT-GTG-----  
3AC41068 YDGTIFHRSIRNF-----VIQGGDPT-GTG-----  
3AC34686 FKGCPFHRIIKKF-----MIQGGDFSNQNGT-----  
3AB30711 YNYCLIHN-----VQR-DFIIQTDGPTGTGR-----  
3AB25645 YKGSTFHRVIKDF-----MIQGGDFVNGDGT-----  
3AB23880 YKGSTFHRVIKDF-----MIQGGDFVNGDGT-----  
NF00527760 FKNSIFHRVVPDF-----ICQGGDITKYNGT-----  
NF01138503 YNGHTFHRIIKGF-----MIQTDGPT-GTG-----  
NF00510830 FKGSSFHRIIPQF-----MCQGGDFTNHNGT-----  
NF00510932 YNGTKFHRIIKDF-----MIQGGDPT-GTG-----  
NF01595779 YKGSFFHRIITPEF-----MCQGGDFTRHNGT-----  
NF02014914 YKGSSFHRIIPGF-----MCQGGDFTRHNGT-----  
NF01930249 YKGSFFHGSTPGF-----TCQGGDFTRHNGT-----  
NF01929278 YKGSFFHRIIPGF-----MCQGGDFTRHNGT-----  
NF00523006 YKGSFFHRIIPGF-----MCQGGDFTRHNGT-----  
NF00508381 YKGSFFHRIIPGF-----MCQGGDFTRHNGT-----  
NF01215170 YNGCVFHRNIKGF-----MVQTDGPT-GTG-----

|              |                                        |
|--------------|----------------------------------------|
| CSRTA        | YKGSSFHRIIPGF-----MCQGGDFTRHNGT-----   |
| NP_783638    | YNGCVFHRNIKGF-----MVQTDGPT-GTG-----    |
| NF01612782   | FKGCPFHRIIKKF-----MIQGGDFSNQNGT-----   |
| NF01612825   | FKGSSFHRIIPQF-----MCQGGDFTNHNGT-----   |
| NF01607941   | FKGCPFHRIIKKF-----MIQGGDFSNQNGT-----   |
| NF01607846   | YKGSFLHRIIPGF-----MCQGGNVICHNDT-----   |
| NF01609144   | YKGSIFHRVIKDF-----MIQGGDFTARDGT-----   |
| NF01608897   | YKGSSFHRIIPGF-----MCQGGKVTCHNGT-----   |
| NP_758443    | YKGSTFHRVIPAF-----MCQAGDFTNHNGT-----   |
| AAH61971     | YKNSKFHRVIKDF-----MIQGGDFTRGDGT-----   |
| G2828710     | YKSCLFHRVVKDF-----MVQGGDFSEGNGR-----   |
| 338388       | YKGSIFHRVIPNF-----MCQGGDFTNHNGT-----   |
| AF132148     | YNFNLFHT-----VQQ-GFIAQTGDPSGAGD-----   |
| NP_611113    | YNNVMFHRSIRNF-----IVQGGDPT-GSG-----    |
| NP_611695    | YKGSKFHRIIKDF-----MIQGGDFTKGDGT-----   |
| NP_610590    | YSGCVFIRNIKGF-----IVQTDGPT-NTG-----    |
| NP_648697    | YKGS PFHRVIPNF-----MCQGGDFTNQNGT-----  |
| NP_648508    | YKNTEFHRLVKG-----FIVQGGDPNGDGTGG-----  |
| NP_648338    | YKGTKFHKIKRVF-----VVQSGDVVKNDGS-----   |
| NP_476656    | YVGSRFHRVVDRF-----LVQGGDIV-NGDG-----   |
| NP_523874    | YNNVVFHRIIRDF-----MIQGGDPT-GTG-----    |
| NP_523773    | YKGS PFHRVIPNF-----MCQGGDFTNHNGT-----  |
| NP_610224    | YKGS PFHRVIPNF-----MCQGGDFTNHNGT-----  |
| NP_733246    | YKGVIFHRVVKDF-----MVQAGDFSAGNGT-----   |
| NP_611935    | YNGHIFHRVIKGF-----MVQTDGPT-GTG-----    |
| EAA03569     | YKGS PFHRVKS LF-----MSQGGDIVHFNGT----- |
| EAA03948     | YKGS KFHRVIRDF-----MIQGGDFTKGDGT-----  |
| EAA04625     | YKGS SFHRVIKDF-----MIQGGDFVNGDGT-----  |
| EAA06299     | YKGS IFHRVIPNF-----MCQGGDFQNHNGT-----  |
| EAA08127     | YKGI IFHRVVKDF-----MIQSGDFSNGNGT-----  |
| EAA09839     | YNGCLFHRSIRNF-----MIQGGDPT-GVG-----    |
| EAA10133     | YNGHLFHRVIKGF-----MIQTDGPT-GTG-----    |
| EAL39647     | YNYNLFHT-----IQS-DFIAQTGDPTGAGD-----   |
| EAA13913     | YNGNLFHRNIKGF-----IVQTDGPT-GTG-----    |
| EAA13914     | YKGS RFHRVIQKF-----MIQGGDVV-SGDG-----  |
| EAA14200     | YKGS TFHRI IPEF-----MCQGGDFTNHNGT----- |
| EAA01474     | YKGS IFQCWENE-----SIITGDFELNNGR-----   |
| KP_321072    | YKGS IFQCWENE-----SIITGDFELNNGR-----   |
| KP_320182    | YNGTQFHRIIRDF-----MVQGGDPT-GTG-----    |
| KP_319131    | YKGS RFHRVIQKF-----MIQGGDVV-SGDG-----  |
| KP_311949    | YKGI IFHRVVKDF-----MIQSGDFSNGNGT-----  |
| CAI11739     | YKGS IFHRVVPNG-----WIQGGDISPEKKG-----  |
| AAQ91263     | YKGS GFHRVIPQF-----MCQGGDFTNHNGT-----  |
| NP_001004626 | YKGS VFHRI IPEF-----MCQGGDFTNHNGT----- |
| NP_001002065 | FKGCPFHRIIKSF-----MIQGGDFSNQNGT-----   |
| NP_957499    | YKGS TFHRVIKDF-----MIQGGDFVNGDGT-----  |
| AAQ94596     | YKGS TFHRVIKDF-----MIQGGDFVNGDGT-----  |
| NP_998184    | YKGS KFHRVIKDF-----MIQGGDFTRGDGT-----  |
| NP_001002146 | YNGCIFHRNIKGF-----IVQTDGPT-GTG-----    |
| AAQ91264     | YKGS SFHRVIPGF-----MCQGGDFTNHNGT-----  |
| AAH59458     | YKGS SFHRVIPGF-----MCQGGDFTNHNGT-----  |
| AAH56814     | YNYCLIHN-----VQR-DFIIQTGDPTGTGR-----   |

|           |                                       |
|-----------|---------------------------------------|
| AAH62863  | YKSSSFHRVIPGF-----MCQGGDFTNHNGT-----  |
| NP_998629 | YKGTFFHRIVKDF-----MIQGGDFSEGNR-----   |
| NP_957285 | RYQYVKKKGYVRL-----HTNKGDP-GTG-----    |
| NP_506749 | FKGSKFHRIPEF-----MIQGGDFTRGNGT-----   |
| NP_506561 | FKGSKFHRIPEF-----MIQGGDFTRHNGT-----   |
| NP_504522 | YTGTILHQISTSKN-----MIMGGDVLNGNGC----- |
| NP_506751 | FKGSKFHRIIPNF-----MIQGGDFTRGNGT-----  |
| NP_497745 | YKQNEFHRIVKKF-----MIQGGDITEGDGR-----  |
| NP_499828 | FKGSKFHRIPEF-----MIQGGDFTEGNGT-----   |
| NP_497257 | YVGSKFHRVIENF-----MIQGGDFTRGDGT-----  |
| NP_509506 | YQGSVFHRVIKGF-----MIQGGDITHGNGT-----  |
| NP_503034 | YEGSIFHRIIPKF-----MLOGGDFTKGDGT-----  |
| NP_501118 | YNGTIFHRIIADF-----MIQGGDPT-GTG-----   |
| NP_496562 | YKGTVFHRLVKN-----FILQGGDPTATGTGG----- |
| NP_495855 | YKNCTFHRVIKDF-----MIQGGDFCNGDGT-----  |
| NP_496337 | YNNTKFHRLIKNF-----MLOGGDPT-GTG-----   |
| NP_495417 | YNGCIFHRNIKDF-----MVQTDGDP-HSG-----   |
| NP_493378 | YNGLTFHRVIKSF-----MIQTDGPS-GKG-----   |
| NP_492343 | YNLNQFHS-----IER-NYVAQTDGPTGTGK-----  |
| NP_493624 | YPGSKFHRVIADF-----MIQGGDFTRGDGT-----  |
| P06073    | FKGSKFHRVIPNF-----MCQGGDFTAGNGT-----  |
| NP_175776 | YNGCLFHT-----VQK-DFTAQTDGPTGTGAG----- |
| NP_567029 | FKGSSFHRIIPGF-----MIQGGDFTRGDGR-----  |
| NP_201554 | YNGVAFHRSIRNF-----MIQGGDPT-GTG-----   |
| NP_200679 | YKSSSFHRIIPSF-----MLOGGDFTHGNGM-----  |
| NP_181407 | YKECQFHRVIKDF-----MVQSGDFLKNDS-----   |
| NP_191166 | YKGSASFHRIIPGF-----MCQGGDFTRGNGT----- |
| NP_171696 | YDGTIFHRNIKGF-----MIQGGDPK-GTG-----   |
| NP_195222 | YKGTFFHRIISGF-----VIQGGDI IHGDGK----- |
| NP_195213 | FKGSIFHRVIPGF-----MCQGGDFTAKNGT-----  |
| NP_196816 | YKGSTFHRVIRDF-----MIQGGDFEKGNGT-----  |
| NP_188932 | YKGSTFDHIVPDL-----MWC GGDIIFE-----    |
| NP_191762 | YKSSSFHRIKDF-----MIQGGDFTEGNGT-----   |
| NP_190046 | YDNHLFHRVIRGF-----MIQTDGPL-GDG-----   |
| NP_180557 | YKGSKFHRIIPSF-----MIQGGDFTHGNGM-----  |
| NP_181157 | YDNVLFHRIVKDF-----IVQGGDPT-GTG-----   |
| NP_179251 | YKSSSFHRVIPKF-----MCQGGDFTAGNGT-----  |
| NP_179709 | FKGSSFHRIIPNF-----MCQGGDFTKGNGT-----  |
| AAK02067  | YKGNRFHRVIKGF-----MIQGGDISANDGT-----  |
| P82869    | YDGAKLNTVNQA-----VITEDGSGKV-----      |
| P05352    | YKGSFFHRIMKGS-----SAQAGDFVNRNGT-----  |
| P49181    | FKGSSFHRIKGF-----MAQGGDFSNGNGT-----   |
| P05314    | FDNTIFHRVIPG-----FLVQGGDPTGSGTGG----- |
| CSZPA     | YAGSTFHRVIPQF-----MLOGGDFTRGNGT-----  |
| E313994   | YDGVIFHRVIPDF-----VIQGGDPT-GTG-----   |
| E1335804  | YEGSIFHRVIPNF-----MIQGGDITKGDGT-----  |
| E1331567  | YKNSTFHRIIQGF-----MIQGGDFVSGDGT-----  |
| 362327    | YKGSRFHRVIKNF-----MLOGGDFTRGNGT-----  |
| 362590    | YRNTIFHRNIARF-----MIQGGDPS-GTG-----   |
| E1294518  | YDNTIFHRIKKNF-----MIQGGDPL-GDG-----   |
| P39728    | YNFCPFYN-----IQH-NYTCQTDGPLGPTG-----  |
| E1263915  | YDGTIVHRVVPE-----FLIQGGDPTGTGMGG----- |



|           |                                        |
|-----------|----------------------------------------|
| CSBY      | YAGSPFHRVIPDF-----MLOGGDFTAGNGT-----   |
| 330507    | YKGVPFHRIIPDF-----MIQGGDTDLTNGF-----   |
| 312324    | FIGSTFHRVIPNF-----MVQGGDFTDGTGV-----   |
| 357050    | YKNGNFHRVVKNF-----MIQAGDIVFG-TQKD----- |
| 348567    | YKGSIFHRVIKDF-----MCQFGDFTNFNGT-----   |
| CSBYC3    | YRKTINKVYPNK-----YIQGG-VVAPDVG-----    |
| 363359    | PER-DFDKILPNG-----AIEGSSVSSSSIE-----   |
| 338324    | YLNSIFHRVIPNF-----MIQGGDFTHRSGI-----   |
| FcCyP19   | YAGSGFHRIIPQF-----MCQGGDFTNHNGT-----   |
| FcCyP20   | YDGLCFHRCVTNA-----FVLTGDPT-GTG-----    |
| FcCyP21.1 | YKGSIFHRVIRNF-----MIQGGDFTNFDGT-----   |
| FcCyP21.3 | YKGSKFHRVIPQF-----MCQGGDFTNNGT-----    |
| FcCyP24.3 | YKGSVFHRIIPGF-----MIQGGDITKNG-----     |
| FcCyP26   | YKGIPFHRIIPGF-----IVQGGDILTKDGR-----   |
| FcCyP28   | YKGCVFHRVIPGF-----MIQGGDITRGNGT-----   |
| FcCyP30   | YKNSTFHRVHRGY-----LIQGGDVVSGQGT-----   |
| FcCyP35.1 | YRGSTFFRILRGA-----WVMGGDISRDHNG-----   |
| FcCyP35.3 | YRGTYFHKIIPAF-----CVQGGDLTMRVNKG-----  |
| FcCyP40   | YKGSTFHRIIAGF-----MIQGGDFTKHNGT-----   |
| FcCyP110  | YNGLTFHRVVPGF-----MIQGGCPV-GDG-----    |
| AAT44353  | YKGSGFHRVIPQF-----MCQGGDFTNHNGT-----   |
| EAL37431  | YTGSFFHRIIPQF-----MIQGGDFTRGDGT-----   |
| EAL37232  | YKNTIFHKNIKGF-----IIQGGDPT-GTG-----    |
| EAL37110  | YIGSIFHRVIPGF-----MAQGGDFT-NGNG-----   |
| EAL36265  | YNNCEFYK-----IEK-DFIARTGRSKQYGN-----   |
| EAL35294  | YKGSAIHRVIKDF-----VIQGGDFVNGDGT-----   |
| J68268    | YSGSGFHRIIPNF-----MCQGGDFTRHNGT-----   |
| J68269    | FANSGFHRIIPNF-----MCQGGDFTNHNGT-----   |
| AAQ15626  | YKGSKFHRVIPQF-----MCQGGDFTSNGT-----    |
| AAB07896  | YAGSGFHRIIPQF-----MCQGGDFTRHNGT-----   |
| AAK14937  | YKGSTFHRVIPHF-----TCQGGDFTNHNGT-----   |
| CAC18541  | YKGCTFHRIIKDF-----MVQGGDFVNGDGT-----   |
| A45000    | YKGSKFHRIIPGF-----MCQGGDFTAGNGT-----   |
| Q9Y0F5    | YKNTIFHKNIKGF-----IIQGGDPT-GTG-----    |
| J47811    | YKGSKFHRVIPNF-----MLOGGDFTRGNGT-----   |
| J50388    | YHNCCFHRVIPQF-----MCQGGDFVKGDT-----    |
| L46884    | YKGSVFHRIIPGF-----MCQGGDFTNGDGT-----   |
| M93420    | YHNCCFHRVIPQF-----MCQGGDFVKGDT-----    |
| J50389    | YKGSTFHRVIKSF-----MIQGGDFTNHDGT-----   |
| 3992633   | YKGSTFHRVIKSF-----MIQGGDFTNHDGT-----   |
| E323073   | YHNCCFHRVIPQF-----MCQGGDFVKGDT-----    |
| 352758    | YKDSIFHRVIPNF-----MIQGGDFTNFDGT-----   |
| E1203753  | YANSPFHRVIPDF-----MCQGGDFTNNGT-----    |
| CAB58290  | LRRLTFRKLLGGFA-----LLGEVEAVQGHSTT----- |
| CAB58298  | YKSSVFHRVIPNF-----MIQGGDFTRGNGT-----   |
| AAF69736  | YQGSTFHRVIPGF-----MIQGGDFTKHNGT-----   |
| AAD46565  | YKDSIFHRVIQNF-----MIQGGDFTNFDGT-----   |
| A53522    | YKGSVFHRIIPDF-----MIQGGDFE-NHNG-----   |
| NP_702112 | YNKNEFFRVIPR-----FLIQTGDHTNTGLHN-----  |
| NP_701512 | YRNTSIHKIYPGI-----GLVGGNVLNDK-E-----   |
| NP_701389 | YKNSPIHRIVTDF-----MFQGGDFNFGNG-----    |
| NP_701030 | YDNTKFHKNIKGF-----AIQGGDPT-NTG-----    |

|            |                                                              |
|------------|--------------------------------------------------------------|
| NF01067443 | YKYCKIERIKKKGK-----CIKSGYLRNKININDDKTYYLNNNNGGDDDDGDYNSIDNIY |
| NF01067965 | YKNTTFHRVIKDF-----MIQGGDFVNYNGS-----                         |
| NF01065889 | YNNCIFHRVIKHF-----MVQTDGDS-GDG-----                          |
| NF00926916 | YKNSIFHRIIPQF-----MCQGGDITNGNGS-----                         |
| 352760     | YTNSIFHRIIPNF-----MAQGGDIT-NFNG-----                         |
| J10322     | YKNTTFHRVIKDF-----MIQGGDFVNYNGS-----                         |
| CAB39039   | YKNSIFHRIIPQF-----MCQGGDITNGNGS-----                         |
| CAD51648   | YDNTIFHRVIPDY-----IIQGGDPT-GTG-----                          |
| NF01497907 | YKNSIFHRIIPQF-----MCQGGDITNGNGS-----                         |
| NF01497552 | YNNCIFHRVIKHF-----MIQTDGDPG-GDG-----                         |
| NF01497379 | YTNSIFHRIIPNF-----MAQGGDIT-NFNG-----                         |
| NF01497199 | YKNTIFHRVIKEF-----MIQGGDFINHNGS-----                         |
| NF01496968 | YKNCKIEKIKKNK-----SIKCGYLRNKVHLGN-----KNNN-----FEYIS         |
| NF01495390 | YRNTYIHKIYPGI-----GLIGGNVLNDK-E-----                         |
| NF01495324 | YDNTIFHRVIPNF-----VIQGGDPT-GTG-----                          |
| NF01493974 | -----MFQGGDFNFGNG-----                                       |
| NF01493918 | YNKNKFFRIIPK-----FLIQTDHTNTGLCNT-----                        |
| E316521    | YKGSVFHRVITDF-----MAQGGDFTNFNGT-----                         |
| CAC35733   | YNGALIYN-----VQK-DY-LASIKSVNPAT-----                         |
| J47812     | YKGSKFHRVIPNF-----MCQGGDFTRGNGT-----                         |
| J47813     | YKGSKFHRVIPNF-----MLOGGDFTRGNGT-----                         |
| G2624966   | YKCGCFHRVIKDF-----MIQGGDFTRHNGT-----                         |
| E1317902   | YNNTKFHRVIRNF-----MMQGGDPT-GTG-----                          |
| E1319851   | YNKTKFHRIIRNF-----IMQGGDPT-GTG-----                          |
| E3057040   | YNNTKFHRIIRNF-----MMQGGDPT-GTG-----                          |
| AAB81959   | YKGSFHRRIIPGF-----MCQGGDFTRHNGT-----                         |
| AF023860   | YKGSFHRRIIPGF-----MCQGGDFTRHNGT-----                         |
| AAB81961   | YKGSFHRRIIPGF-----MCQGGDFTRHNGT-----                         |
| AAF22215   | YKGSFHRRIIPGF-----MCQGGDFTRHNGT-----                         |
| AF243140_1 | YKGSFHRRIIPGF-----MCQGGDFTRHNGT-----                         |
| AF252388   | YKGSTFHRVIPSF-----MCQAGDFTNHNGT-----                         |
| CBOAB      | YKGSFHRRIIPGF-----MCQGGDFTRHNGT-----                         |
| NF01922219 | FKGSKFHRRIIPGF-----MAQGGDFTKNGT-----                         |
| NF01725587 | YKGSFHRVIPSF-----MCQGGDFTRQNGT-----                          |
| NF01897292 | NG-TRIHRINKSF-----MLOAGDII-NQDG-----                         |
| CASHYAC    | YKGSFHRRIIPGF-----MCQGGDFTRHNGT-----                         |
| NF00071027 | YKGSFHRRIIPGF-----MCQGGDFTRHNGT-----                         |
| NF01951405 | YDGTIFHRSIRNF-----VIQGGDPT-GTG-----                          |
| NF01059378 | YKGSFHRRIIPGF-----MCQGGDFTRHNGT-----                         |
| NF01105745 | FKGSFHRVIPNF-----MCQGGDFTRGNGT-----                          |
| NF00495096 | YKGSFHRRIIPGF-----MCQGGDFTRHNGT-----                         |
| NF01053198 | YKGSFHRVIPGF-----MCQGGDFTAGNGT-----                          |
| CSPGA      | YKGSFHRRIIPGF-----MCQGGDFTRHNGT-----                         |
| NF01950932 | YNGCVFHRNIKGF-----MVQTDGPL-GTG-----                          |
| NF01951326 | YKGC PFHRI IKQF-----MVQGGDFSNQNGT-----                       |
| NF00909389 | YKGSFHRVIPSF-----MCQGGDFTAGNGT-----                          |
| NF01286555 | YKGSFHRVIPGF-----MCQGGDFTEGNGT-----                          |
| NF01737225 | YKGSFHRVIPKF-----MCQGGDFTKNGT-----                           |
| NF01590839 | YDGLTFHRVIADF-----MIQGGDPT-GTG-----                          |
| AAH51602   | YNGTKFHRLIKDF-----MAQGGDPT-GTG-----                          |
| AAT69672   | FRNSGFHRIIPEF-----MCQGGDFTNHNGT-----                         |
| AAH54186   | FRNSGFHRIIPEF-----MCQGGDFTNHNGT-----                         |

|            |                                       |
|------------|---------------------------------------|
| AAH54168   | YKGSKFHRVIKEF-----MIQGGDFTRGDGT-----  |
| NF01208049 | YDGTIFHRSIRNF-----VIQGGDPT-GTG-----   |
| NF01844632 | YKNCLFHRVVKDF-----MIQGGDFSEGNR-----   |
| NF01844615 | YDNTIFHRVVPE-----FIIQGGDPTGTGTGG----- |
| NF01915773 | YNGTKFHRIKDF-----MVQGGDPT-GTG-----    |
| NF01915657 | YTGCLFHHRNIKGF-----MVQTDPT-GTG-----   |
| NF01557564 | FKGCPFHRIKKF-----MIQCGDFSNQNGT-----   |
| AAH41536   | YKNSGFHRIIPSF-----MCQGGDFTNHNGT-----  |
| AAH85963   | YKSLFHRVVKDF-----MVQGGDFSEGNR-----    |
| AAH64250   | YKGSTFHRVIKDF-----MIQGGDFVNGDGT-----  |
| AAH61335   | FKGCPFHRIKKF-----MIQCGDFSNQNGT-----   |
| AAH59741   | YKNSGFHRIPEF-----MCQGGDFTNHNGT-----   |
| AAH67931   | YKNCMFHRVVKDF-----MIQGGDFSEGNR-----   |
| AAH44993   | YDGTIFHRSIRNF-----VIQGGDPT-GTG-----   |
| A40516     | FKGSKFHRVIKDF-----MIQGGDFTRGDGT-----  |
| CYPB_BOVIN | YKDSKFHRVIKDF-----MIQGGDFTRGDGT-----  |
| AAR19276   | YKGSFHRVIPGF-----MCQGGDFTRHNGT-----   |
| A46579     | FKGCPFHRIKKF-----MIQGGDFSNQNGT-----   |
| AAV40687   | YKGSFHRVIKGF-----MCQGGDFTAGNGT-----   |
| NF01637248 | YAGSGFHRVIPQF-----MLOGGDFTKNGT-----   |
| CYPR_BOVIN | FKSSIFHRVIPDF-----VCQGGDITKHDGT-----  |
| CYPR_CALVI | YVGSEFHRVISRF-----LIQGGDIV-NNDG-----  |
| E1317906   | YNNTKFHRLIKNF-----MLOGGDPT-GTG-----   |
| AAB87888   | YKGSIFHRVIPNF-----MCQGGDFTNHNGT-----  |
| AAB87889   | YKGSIFHRVIPNF-----MCQGGDFTNHNGT-----  |
| Q9XZZ5     | FKGSKFHRVIPKF-----MCQGGDFTKGDGT-----  |
| 363995     | YKGSFHRVIPNF-----MCQGGDFTNHNGT-----   |
| 31703696   | YKGSTFHRVIPGF-----MCQGGDFTRHNGT-----  |
| J36797     | YKGSFHRVIPNF-----MCQGGDFTRGDGT-----   |
| AF017738   | YNGTIFHRIIRD-----FIVQGGDPTGTGEGG----- |
| L37292     | YKGSTFHRVIKNF-----MIQGGDFTKGDGT-----  |
| AAS01736   | FKGSSFHRVIPNF-----MCQGGDFTAGNGT-----  |
| AAO61985   | YHLNSYKIFTIRILWFIIICFCSLFIEHTSE-----  |
| CAC80550   | YKGSFHRVIPGF-----MCQGGDFTAGNGT-----   |
| AAO63777   | YKGSTFHRVIPGF-----MCQGGDFTEGNGT-----  |
| 353522     | YKGC PFHRIIPQF-----MCQGGDFTRMNGT----- |
| E280557    | YKSSIFHRTINNF-----MIQGGDFT-SQNG-----  |
| J70827     | YKGSTFHRVIKNF-----MIQGGDFTKGDGT-----  |
| J70884     | YKGSTFHRCIKNF-----MIQGGDFTKGDGT-----  |
| J55771     | YVDSFHRVIPNF-----MVQAGDIV-NGNG-----   |
| Q1024669   | YKGSIFHRIINDF-----MIQGGDFTKGDGT-----  |
| 227879     | YKGSFHRVITNF-----MCQGGDFTMGNGT-----   |
| AAD48910   | YKDSKFHRIIPNF-----MIQGGDFTRGDGT-----  |
| AAO51811   | YKCTFHKISKDF-----MIQGGDFVVKRDS-----   |
| AAF76472   | YDGTIFHRNIKGF-----MIQGGDPK-GTG-----   |
| AAP80861   | YKGSFHRRIIPSF-----MIQGGDFTLGDGR-----  |
| AAP73848   | YKGCQFHRVIKDF-----MIQGGDYMKG DGT----- |
| 3AB62329   | YDNVIFHRIKDF-----IVQGGDPT-GTG-----    |
| AAL75728   | YKGSFHRVVPGF-----MCQGGDITAGNGT-----   |
| 348017     | YKGSTFHRVIPNF-----MCQGGDFTRGNGT-----  |
| 348018     | YKGSFHRRIIPNF-----MCQGGDFTRGNGT-----  |
| 3AD53622   | FKGSFHRRIIPSF-----MIQGGDFTLGDGR-----  |

3AD53621 FKGSFAFHRIIPSF-----MIQGGDFTLGDGR-----  
3AD53620 YKGTFFHRIIPGF-----MIQGGDTVSGNGT-----  
KP\_507188 YRGTLVHKLLOQO-----FFVAGRQGP RRDR-----  
KP\_483750 YDNLIFHRVIKGF-----MIQTGDPL-GDG-----  
KP\_483749 YEKSYMHRDVVTH-----VAVSPADYFITGSA-----  
KP\_482125 YDGMEIQRADG-----FVVQTDGPEGPA-----EGF  
KP\_478742 YDGIKLCASQA-----IIADNEN GK-----  
KP\_478741 YDGIKLCASQA-----IIADNEN GK-----  
NP\_385690 YDGVVFHRVIED-----FMAQTGDVQY GK-----  
NP\_385689 YDNVAFHRVIK G-----FMAQTGDVEFG-----  
NP\_349373 YDGVIFHRVIPGF-----MIQGGDPD-GNG-----  
3AD45990 AGGLAFRKQ-----LSG-QFWRCRAGATGSGFDVKGM-----  
3AD45991 YNGCLFHK-----VEK-DFLAQTGDPTGTGAG-----  
NP\_908419 YRRKEFVKIVPG-----YVQHGGVVSYP AIP-----  
NP\_919903 YRGEEYENLEACP-----VCKALRYKIRRDD-----  
3AD35839 YKGS CFHRVIKGF-----MVQGGDITAGDGT-----  
AAU87301 FKGS SFHRVIPGF-----MCQGGDFTRGNGT-----  
CAG90469 YTGSI FHRIIPKF-----MLQGGDFETGKGY-----  
CAG88330 YASSTFHRVIPQF-----MLQGGDFTRGNGT-----  
CAG88054 YFFTPFYN-----LHK-DLIVSSGDPDYPEN-----  
CAG86818 YNSTIFHRVIKTF-----MIQAGDPL-GNG-----  
NF01109982 FKGS SFHRVIPGF-----MCQGGDFTNHNGT-----  
NF00686348 YNGLRFHRVIEG-----FMAQTGDPKGD-----  
NF00686217 -----DPKGD-----  
NF02138644 YKGSIFHRIIPNF-----MCQGGDFTRFN GT-----  
NF00926921 YEGSTFHRVIKDF-----MIQGGDFTN GDGT-----  
NF00909931 YKGSIFHRVIPNF-----MCQGGDFTAGNGT-----  
NF00956595 YKGS SFHRIIPQF-----MCQGGDFTNHNGT-----  
NF02035209 YRGPPSTGVIPGF-----MCQGGDFTAGNGT-----  
NF01329591 YAGTIFHRVIPGF-----MIQGGMDA-NMI-----  
CAG86678 YEDNRILRYVPNF-----IIQTGDPSQSGKESE-----  
CAG86274 DDKTLFHRVIKDF-----MIQTGDYQ-FGEG-----  
CAG85447 YIGTTFNKVIKD-----YLVQTSKIKEP-----  
CAG85287 YANSIFHRVIPNF-----MLQGGDFETGKGY-----  
CAG84900 YKGSIFHRIKDF-----MCQGGDFTHGSGI-----  
CAG84822 FKGN YFHRVIKNF-----VIQAGDIENGSSIKD-----  
CAG84723 YKGT FHRVVKGF-----MIQGGDFVRGNGL-----  
CAG79895 YKGSKFHRVIKNF-----MIQGGDFTRGDGT-----  
CAG78939 YDGTIFHRNIKHF-----MIQGGDPT-GTG-----  
CAG82238 FKGS SFHRVIKDF-----MVQGGDFTAGNGT-----  
CAG81980 YANSIFHRVIPQF-----MLQGGDFTRHNGT-----  
CAG81971 YAGSS FHRVIPNF-----MLQGGDFTNHNGT-----  
CAG81844 YKESTFHRVVKGF-----MIQGGDFVRGNGL-----  
CAG84141 YDSKPFYRVLP G-----ELIQCGQOEAGNNTN-----  
CAG84091 FKDSNIHRIVRNF-----AIQGGDIVYG-----  
CAG83821 YKNSDIHRLVAPE----F--IVQGGDVGRSVFD-----  
CAG76968 YNGTTFHRVIPGF-----MVQGGGFSG-EMN-----  
CAG62671 YKRSCFHRVIRNF-----MIQGGDLVFG-KEDN-----  
CAG76052 YDNTIFHRVINGF-----MIQGGGFAA-GMD-----  
CAG59915 YKGVPFHRIIPQF-----MIQGGDIDL TNGF-----  
CAG58658 YAGSPFHRVIPDF-----MLQGGDFTAGNGT-----  
33777556 FKGSVFHRVIPGF-----MLQGGDFTRGDGT-----

|            |                                        |
|------------|----------------------------------------|
| AAF65770   | FKGSSFHRVIPGF-----MCQGGDFTAGNGT-----   |
| 3AA25755   | FKGSSFHRVIPNF-----MCQGGDFTAGNGT-----   |
| 3STO       | YKGSTFHRVIPGF-----MCQGGDFTAGNGT-----   |
| 3SRP       | YKGSAFHRVIPKF-----MCQGGDFTAGNGT-----   |
| 3SZM       | YKGSTFHRVIPEF-----MCQGGDFTRGNGT-----   |
| CYPH_ALLCE | YKGSSFHRVIPGF-----MCQGGDFTAGNGT-----   |
| AAG01536   | YKGSTFHRVMPGF-----MCQGGDFTAGNGT-----   |
| AAB51386   | YKGSTFHRVIPGF-----MCQGGDFTAGNGT-----   |
| 354833     | FKGSIFHRVIPNF-----MCQGGDFTAGNGT-----   |
| K85185     | YKDSSFHRVIPGF-----MCQGGDFTAGNGT-----   |
| Y08273     | YKGSAFHRVIPGF-----MCQGGDFTAGNGT-----   |
| Y08320     | YKGSAFHRVIPGF-----MCQGGDFTAGNGT-----   |
| E1226445   | YKGSTFHRVIPNF-----MCQGGDFTAGNGT-----   |
| L32095     | YQGSFFHRIIPNF-----MIQGGDFTEGNGT-----   |
| CAA10766   | YKGCHFHRVIKDF-----MIQAGDFVKGDGS-----   |
| AAF69796   | YAGSGFHRVIPQF-----MLOGGDFTNHNGT-----   |
| AAF69795   | YAGSGFHRVIPQF-----MLOGGDFTNHNGT-----   |
| 3SNCM      | YKGSSFHRIIPEF-----MLOGGDFTTRGNGT-----  |
| NF01287451 | YNFSPIHS-----IQK-SFSFQTGDPLGPLSSE----- |
| NF01527836 | YNASPFHRMIPSF-----MVQTGAPA-NPSPP-----  |
| NF01488902 | YDSTVFHRIKDF-----MIQGGDPT-GTG-----     |
| NF00648058 | YKGSTFHRVIKQF-----MIQGGDFTAGNGT-----   |
| NF01487278 | YEGSTFHRVIKQF-----MIQGGDFTKGDGT-----   |
| NF01486260 | YNNTIFHRVIRKF-----MIQGGDPL-GDG-----    |
| NF00904102 | YEGSTFHRVIKQF-----MIQGGDFTKGDGT-----   |
| NF01484914 | YNFSPIHS-----IQK-SFSFQTGDPLGPLSSE----- |
| NF01484255 | YKGSKFHRIIPNF-----MCQGGDFLNGDGT-----   |
| NF01483993 | YDNTIFHRLIPG-----FIVQGGDPSGTGHGG-----  |
| NF01533203 | YKGSTFHLVIPNF-----MCQGGDFTAGNET-----   |
| NF01483647 | YRDVAFHRSIRNF-----MIQGGDPS-GTG-----    |
| 371849     | YEGSSFHRIIPEF-----MLOGGDFTTRGNGT-----  |
| J17900     | YKNSKFHRVIKDF-----MIQGGDFTTRGDGT-----  |
| NF00873669 | YAGSHFHRVIPDF-----MLOGGDFTAGNGT-----   |
| NF01527595 | YAGSHFHRVIPNF-----MLOGGDFTAGNGT-----   |
| NF01539217 | YAGSSFHRIIPQF-----MLOGGDFTTRGNGT-----  |
| 31035365   | YEGSTFHRVIKDF-----MIQGGDFTNGDGT-----   |
| YP_116397  | YNGTIFHRVIPGF-----MIQGGGFEP-GMR-----   |
| YP_119877  | FDGTDCHRMTADA----TLKVLQCGDPT-GTG-----  |
| CAD25897   | YENGLFHRIIPGF-----MMQGGDVV-MGNG-----   |
| CAD26352   | YKGSTFHRIIPGF-----MVQGGDYTAHNGT-----   |
| AAD17998   | YEGSNFHRVIKDF-----MIQGGDFTTRGDGT-----  |
| 32959712   | FKGSTFHRVIPNF-----MCQGGDFTTRGNGT-----  |
| 3SNCC      | YKGSSFHRIIPEF-----MLOGGDFTTRGNGT-----  |
| AJ006689   | YRESTFHRIIPNF-----MIQGGDFTTRGNGT-----  |
| AAF28343   | YDNTIFHRLIKDF-----MIQGGDPL-GNG-----    |
| AAD50375   | YKGSSFHRVIKNF-----MVQGGDFTHTGTGI-----  |
| AAK21908   | YKGSAFHRVIKDF-----MCQGGDFTTRGNGT-----  |
| AAG13968   | YKDSGFHRIIPDF-----MLOGGDFTTRGNGT-----  |
| 3AB58884   | YKDSGFHRIIPDF-----MLOGGDFTTRGNGT-----  |
| E1363908   | YAGSHFHRVIPDF-----MLOGGDFTAGNGT-----   |
| AAD16142   | YKGSTFHRVIPQF-----MLOGGDFTTRHNGT-----  |
| 31764137   | FKHSIFHRVIPDF-----MIQGGDFTNGNGT-----   |

|           |                                                   |
|-----------|---------------------------------------------------|
| Z32674    | ARPSTVS--SPSS-----CSRAATSPA VTGT-----             |
| JT0686    | YKGS SFHRIIPDF-----MLOGGDFTRNGT-----              |
| CSCK      | YKGSIFHRVIPQF-----MLOGGDFTFNNGT-----              |
| NP_986490 | YAGCPFHRVIPDF-----MLOGGDFTHGTGV-----              |
| NP_985014 | YKGVPFHRIIPDF-----MLOGGDTDLTNGF-----              |
| NP_984799 | FRGNRFHRVIKNF-----MVQAGDIMYG-MEG-----             |
| NP_984183 | YQGS LFHRVIKGF-----MCQFGDFTNGDGT-----             |
| NP_982586 | YKNTVFHRVVPEK-----YICGGKVL DY-----                |
| NP_982486 | YINSTFHRVIPNF-----MIQGGDFTHGTGV-----              |
| AAT09096  | YKGS SFHRIIPQF-----MIQGGDF TQNGR-----             |
| YP_014938 | YDGLIFHRVIPDF-----MIQGGDPD-GRG-----               |
| NP_951950 | YDGLIFHRVIKGF-----MVQGGGMDE-NMQ-----              |
| NP_935388 | YVGSQFHRVIPGF-----MAQGGGFDE-KMN-----              |
| NP_907765 | YDGLIFHRVIKRF-----MLOGGDPT-GTG-----               |
| 3AC91249  | YVQDRFELDPIKLR-----EEMSNLHKRYIAD-----             |
| 3AC90551  | YDGLVFHRVVPD-----FVIQGGDPKNG-----TGGF             |
| 3AC89441  | YTGTAFNRFEG-----YLVQVSDPQGN-----DGGY              |
| 3AC88914  | YNNLAFHRVVSG-----FVIQGGDPLNG-----TGGF             |
| AAV50868  | YKYNRHINRTYEG-----CKFHNVLHNNYIVSG-----DIY         |
| AAV82698  | YNGTIFHRLVPGF-----VIQGGGYDE-DFQ-----              |
| AAV81872  | YDGTIFHRIISNF-----MVQGGGFEP-GMK-----              |
| NP_736022 | YNGLSFHRVIKDF-----MIQSGDPN-GDG-----               |
| NP_734780 | YDGIIFHRIIPDF-----MIQGGDPT-GTG-----               |
| YP_085398 | YDGVTFHRVIPGF-----VSQGGDPT-GTG-----               |
| NP_643098 | HLPAEFER-----ASQGLDFQPLPDS-----                   |
| NP_641352 | YNGLSFHRVIADF-----MIQGGCPE-GSG-----               |
| 3AB76758  | YNGLEFTRSEES-----YVLQTDGPPGKE-----QGF             |
| YP_129479 | YDGTIFHRVIKGF-----MIQGGGFTV-DMQ-----              |
| YP_129310 | YNDTIFHRVIDGF-----MVQGGGMSS-GMV-----              |
| YP_129032 | YVDTIFHRVIPGF-----MAQGGGFDQ-EMK-----              |
| YP_101389 | YNGTLFHRVIKDF-----MVQAGDPESKNAP-----              |
| YP_087816 | YDNTIFHRVIDGF-----MIQGGGFEP-GMN-----              |
| YP_087815 | YNNTIFHRVIDGF-----MIQGGGMEP-GMR-----              |
| YP_076496 | YDGVTFHRIKDF-----MIQGGDPT-GTG-----                |
| AAT91289  | YEGSSFHRVIPQF-----MLOGGDFTKNGT-----               |
| AAT91260  | YEGSSFHRVIPQF-----MLOGGDFTKNGT-----               |
| NP_868477 | FEGSAFHRVIPGF-----MLOGGDFTAGNGT-----              |
| NP_867717 | YDGLVFHRVIPNF-----MVQGGCPE-GSG-----               |
| NP_867158 | YDGLIFHRVVNGF-----VIQGGDPT-GTG-----               |
| NP_865515 | YDGMDFSQVVPNM-----LALSGDPTGDGRG-----              |
| NP_992233 | YDNTIFHRVIDGF-----MIQGGGFEP-GMS-----              |
| NP_991569 | YNNTIFHRVIPGF-----MIQGGGFTA-DFK-----              |
| NP_280624 | YAGVSFHRIIEGF-----MIQGGDPT-GTG-----               |
| 3AC18575  | YDDVVCHRLTTS-----IYVLQCGDPS-GTG-----              |
| 3AC16839  | YDGAVFHRVIDRF-----MIQGGDPT-GTG-----               |
| 3AB82272  | YDGLTFHRIIPGF-----MIQGGCPE-GTG-----               |
| 3AB99042  | YNDTVCHRITTS-----IYVLQCGDPS-STG-----              |
| 3AB97427  | YNGSVFHRVIDGF-----MIQGGDPT-GTG-----               |
| 3AC08372  | YDGLPFTRAEES-----YVLQAGDPPGPE-----VGF             |
| 3AC07690  | YDGTIFHRVVREP--R-PFVVQGGDPQTKDPKVSPOLYG-----TG SF |
| YP_072215 | YNNTIFHRVIPGF-----MIQGGGFTA-DFK-----              |
| YP_069574 | YDNTIFHRVIDGF-----MIQGGGFEP-GMS-----              |

NP\_778719 YDGLNFHRVIANF-----MIQGGCPE-GSG-----  
NP\_245881 YDNTIFHRVIDGF-----MIQGGMDE-AMR-----  
NP\_245880 YNGTIFHRVIPGF-----MIQAGFEV-GMK-----  
NP\_354667 YDNVAFHRVIDG-----FMAQTGDVQYG-----  
NP\_354666 YDGVVFHRVIED-----FMAQTGDVKFGK-----  
NP\_298502 YDRLNFHRVIANF-----MIQGGCPE-GSG-----  
AAN39296 FKGSSFHRVIPGF-----MCQGGDFTNHNGT-----  
AAQ24380 YKGSTFHRVIPGF-----MCQGGDFIRGDGT-----  
ZP\_00353225 YDGLTFHRVIDGF-----MIQGGCPR-GDG-----  
ZP\_00244808 YDGTVFHRVIKGF-----MVQGGFEP-GLK-----  
ZP\_00244807 YDGTIFHRVIDGF-----MIQGGFDK-DMK-----  
ZP\_00358245 YDGLTFHRVIKDF-----VIQGGDPT-GRG-----  
ZP\_00350273 YDNTIFHRVIDGF-----MIQGGFTP-DMQ-----  
ZP\_00129494 YENTIFHRVIKNF-----MIQGGVTM-RME-----  
ZP\_00130259 YDGTIFHRVMDGF-----MVQGGFTE-NMK-----  
ZP\_00136576 YDGTLFHRVIPGF-----MVQGGFSA-GMQ-----  
NF01760157 YNGTIFHRVIKDF-----VIQ-GGDPT-GTG-----

CSHUA -----G GK-SIYG-----EKFEDENFIL-  
NP\_839944 -----GDK-SIYG-----EKFDDENLIR-  
NP\_115861 -----RGGNSIWG-----KKFEDEY-  
NP\_570981 -----RGGNSIWG-----KKFEDEY-  
NP\_057143 -----RGGASIYG-----KQFEDEL-  
CSHUB -----G GK-SIYG-----ERFPDENFKL-  
366681 -----G GK-SIYG-----KKFDDENFIL-  
A57545 -----G GQ-SIYG-----DKFEDENFDV-  
A41581 -----G GK-SIYG-----SRFPDENFTL-  
A54204 -----G GV-SIYG-----ETFPDENFKL-  
364705 -----TGGESYWG-----KPFKDEF-  
D38552 -----MGGESIWG-----GEFEDEFHS-  
NP\_624311 -----G GESIFG-----QLYGDQASFFEAKEVPRI  
32708309 -----G VA-SIYRG-----PFADEN-  
A45981 -----G GE-SIYG-----EKFEDEN-  
J40763 -----G GE-SIYG-----GFFEDESFAV-  
A47328 -----G GE-SIYG-----GYFKDENFIL-  
KP\_531396 -----G GK-SIYG-----EKFEDENFIL-  
KP\_525294 -----G GK-SIYR-----EKFGDENFIL-  
KP\_523512 -----G GK-SIYE-----EKLD DENFIL-  
KP\_507866 -----G GK-SIYG-----SRFPDENFTL-  
KP\_517783 -----G GK-SIYG-----EKFDDENFIL-  
KP\_517773 -----G GK-SIYG-----EKFH DENLIR-  
KP\_526904 -----G GK-SVYG-----EKFDDENFIL-  
KP\_516556 -----G GT-SIYR-----EKFDCKNFIL-  
KP\_526001 -----G GK-SIYG-----EKFDEENFIL-  
KP\_516021 -----RGGNSIWG-----KKFEDEY-  
KP\_515886 -----G GE-SIYG-----GFFEDESFAV-  
KP\_525218 -----G DK-SIYG-----EKFDYENLIR-  
KP\_507684 -----G GK-SIYG-----EKFEDENFIL-  
KP\_524688 -----G VA-SIYRG-----PFADEN-  
KP\_513346 -----G GK-SIYG-----KKFDDENFIL-  
KP\_524598 -----G GK-SVHQ-----EKFDDENFIL-

|            |                     |                     |
|------------|---------------------|---------------------|
| KP_515004  | -----TGGESYWG-----  | KPFKDEFR---         |
| KP_523437  | -----               | KFEDEFIL-           |
| KP_520485  | -----GSK-SIYG-----  | EKFDDENFIL-         |
| KP_519076  | -----GGK-SIYG-----  | EKFEDENFIL-         |
| KP_527705  | -----GGK-SIYG-----  | EKFEDENFIL-         |
| KP_527529  | -----GGESIFG-----   | QLYGDQASFFFEAEKVPRI |
| KP_518678  | -----GGESIFG-----   | QLYGDQASFFFEAEKVPRI |
| CSMSA      | -----GGR-SIYG-----  | EKFEDENFIL-         |
| NP_598845  | -----GGR-SIYG-----  | SRFPDENFTL-         |
| AAH58369   | -----RGGASIYG-----  | KQFEDEL---          |
| A56861     | -----GGK-SIYG-----  | ERFPDENFKL-         |
| A40047     | -----GGM-SIYG-----  | ETFPDENFKL-         |
| NKCR_MOUSE | -----GGE-SIYG-----  | GYFKDENFIL-         |
| AAH61645   | -----RGGSSIWA-----  | KKFEDEY---          |
| 3AC41068   | -----TGGESFWG-----  | KPFKDEF---          |
| 3AC34686   | -----GGE-SIYG-----  | EKFEDEN---          |
| 3AB30711   | -----GGESIFG-----   | QLYGDQASFFFEAEKVPRI |
| 3AB25645   | -----GVA-SIYRG----- | PFADEN---           |
| 3AB23880   | -----GVA-SIYRG----- | PFADEN---           |
| NF00527760 | -----GGQ-SIYG-----  | DKFDDENFDL-         |
| NF01138503 | -----MGGESIWG-----  | GEFEDEFHS--         |
| NF00510830 | -----GGK-SIYG-----  | KKFDDENFIL-         |
| NF00510932 | -----RGGASIYG-----  | KQFEDEL---          |
| NF01595779 | -----GCR-SIYG-----  | EKFEDENFIL-         |
| NF02014914 | -----GGR-SIYG-----  | EKFEDENFIL-         |
| NF01930249 | -----GGR-SIYG-----  | EKFEGKNFIL-         |
| NF01929278 | -----GGR-SIYG-----  | ERFEDEDFIL-         |
| NF00523006 | -----GGR-SIYG-----  | EKFEDENFIL-         |
| NF00508381 | -----GGR-SIYG-----  | EKFEDENFIL-         |
| NF01215170 | -----RGGSSIWA-----  | KKFEDEY---          |
| CSRTA      | -----GGK-SIYG-----  | EKFEDENFIL-         |
| NP_783638  | -----RGGSSIWG-----  | KKFEDEY---          |
| NF01612782 | -----GGE-SIYG-----  | EKFEDEN---          |
| NF01612825 | -----GGK-SIYG-----  | KKFDDENFIL-         |
| NF01607941 | -----GGE-SIYG-----  | EKFEDEN---          |
| NF01607846 | -----GGM-SLYG-----  | EKFEDENVIL-         |
| NF01609144 | -----GGM-SIYG-----  | ETFPDENFKL-         |
| NF01608897 | -----GGK-SIYG-----  | EKFENDSFIL-         |
| NP_758443  | -----GGK-SIYG-----  | SRFPDENFTL-         |
| AAH61971   | -----GGK-SIYG-----  | ERFPDENFKL-         |
| 32828710   | -----GGE-SIYG-----  | GFFEDESFAV-         |
| 338388     | -----GGK-SIYG-----  | NKFPDENFEL-         |
| AF132148   | -----GGSSIWG-----   | VVEGP--QKRFFEAFLPKI |
| NP_611113  | -----SGGESIWG-----  | KKFEDEF---          |
| NP_611695  | -----GGR-SIYG-----  | ERFEDENFKL-         |
| NP_610590  | -----KNGQSIWG-----  | QKFDDEF---          |
| NP_648697  | -----GGR-SIYG-----  | NKFPDENFEL-         |
| NP_648508  | -----ESIYG-----     | QPFKDEFHSRL         |
| NP_648338  | -----SGESIYG-----   | PVFDDENFELS         |
| NP_476656  | -----TGSISIYG-----  | DYFPDEDK---         |
| NP_523874  | -----RGGASIYG-----  | SEFADEL---          |
| NP_523773  | -----GGK-SIYG-----  | KKFNDFENL-          |



|              |                     |                           |
|--------------|---------------------|---------------------------|
| NP_610224    | -----GVT-SIYGN----- | -----TFGDEN----           |
| NP_733246    | -----GGE-SIYG-----  | -----GTFEDESFEK--         |
| NP_611935    | -----TGGKSIWG-----  | -----SDFKDEFVFP--         |
| EAA03569     | -----GGESIYG-----   | -----KTFEDENFTLL          |
| EAA03948     | -----GGR-SIYG-----  | -----ERFADENFKL--         |
| EAA04625     | -----GVM-SIYGT----- | -----PTFPDEH-----         |
| EAA06299     | -----GGK-SIYG-----  | -----NKFEDENFIL--         |
| EAA08127     | -----GGE-SIYG-----  | -----GTFDDEEFTL--         |
| EAA09839     | -----NGGTSAWG-----  | -----KKFADEI-----         |
| EAA10133     | -----TGGQSIWG-----  | -----GEFKDEFCS--          |
| EAL39647     | -----GGSSVWG-----   | -----ILEGA--EKRYFEGESVPKI |
| EAA13913     | -----KGGQSIWK-----  | -----RKFEDEF-----         |
| EAA13914     | -----HGAISMYG-----  | -----KYFDDE-----          |
| EAA14200     | -----GGK-SIYG-----  | -----KKFADENFIL--         |
| EAA01474     | -----GGR-----       | -----SVFEEGFFMP--         |
| KP_321072    | -----GGR-----       | -----SVFEEGFFMP--         |
| KP_320182    | -----RGGQSIYG-----  | -----ATFADEI-----         |
| KP_319131    | -----HGAISMYG-----  | -----KYFDDE-----          |
| KP_311949    | -----GGE-SIYG-----  | -----GTFDDEEFTL--         |
| CAI11739     | -----TGGESIYG-----  | -----PTFEDENFVI--         |
| AAQ91263     | -----GGK-SIYG-----  | -----NKFEDENFTL--         |
| NP_001004626 | -----GGK-SIYG-----  | -----KKFN DENFKL--        |
| NP_001002065 | -----GGE-SIYG-----  | -----DKFEDEN-----         |
| NP_957499    | -----GIC-SIYRG----- | -----PFADEN-----          |
| AAQ94596     | -----GIC-SIYRG----- | -----PFADEN-----          |
| NP_998184    | -----GGK-SIYG-----  | -----DRFPDENFKL--         |
| NP_001002146 | -----KGGTSIWG-----  | -----RKFEDEF-----         |
| AAQ91264     | -----GGK-SIYG-----  | -----NKFADENFNL--         |
| AAH59458     | -----GGK-SIYG-----  | -----NKFADENFNL--         |
| AAH56814     | -----GGESVFC-----   | -----KLYGDQARFFESEKMPRI   |
| AAH62863     | -----GGK-SIYG-----  | -----NKFADENFNL--         |
| NP_998629    | -----GGE-SIYG-----  | -----GFFEDGSFSM--         |
| NP_957285    | -----TGGESFWG-----  | -----KPFKDEF-----         |
| NP_506749    | -----GGE-SIYG-----  | -----EKFPDENFKE--         |
| NP_506561    | -----GGE-SIYG-----  | -----NKFKDENFDL--         |
| NP_504522    | -----GRCAPVSR-----  | -----KLFQENNFSS--         |
| NP_506751    | -----GGE-SIYG-----  | -----EKFPDENFKE--         |
| NP_497745    | -----GGF-SIYG-----  | -----RYFDDEKFKL--         |
| NP_499828    | -----GGE-SIHG-----  | -----EKFD DENFKE--        |
| NP_497257    | -----GGR-SIYG-----  | -----ERFEDENFKL--         |
| NP_509506    | -----GGY-SIYG-----  | -----RTFD DENLAL--        |
| NP_503034    | -----GGK-SIYG-----  | -----TKFD DENFTL--        |
| NP_501118    | -----RGGASIYG-----  | -----DKFSDEI-----         |
| NP_496562    | -----ESIYG-----     | -----KPFKDEIHQRL          |
| NP_495855    | -----GLM-SIYGS----- | -----KFRDEN-----          |
| NP_496337    | -----HGGESIWD-----  | -----KPF SDEF-----        |
| NP_495417    | -----KGGESIWG-----  | -----GPF EDEF-----        |
| NP_493378    | -----TGGESIWG-----  | -----EDFEDEFHP--          |
| NP_492343    | -----GGESVYS-----   | -----DMYGE--QGRYFEREDLPKM |
| NP_493624    | -----GGR-SIYG-----  | -----EKFADENFKL--         |
| FO6073       | -----GGE-SIYG-----  | -----SKFEDENFER--         |
| NP_175776    | -----GDSIY-----     | -----KFLYGEQA-RFYKDEIHLDL |

|           |                                   |                       |
|-----------|-----------------------------------|-----------------------|
| NP_567029 | -----GGE-SIYG-----                | DKFADENFKL-           |
| NP_201554 | -----KGGESIWG-----                | KPFKDEP----           |
| NP_200679 | -----GGE-SIYG-----                | EKFADENFKL-           |
| NP_181407 | -----GCM-SIYGH-----               | -KFEFEN-----          |
| NP_191166 | -----GGE-SIYG-----                | -SKFEFENFKL-          |
| NP_171696 | -----KGGTSIWG-----                | -KKFNDEI-----         |
| NP_195222 | -----SSD-SIYG-----                | -GTFPDENFKI-          |
| NP_195213 | -----GGE-SIYG-----                | -AKFKDENFIK-          |
| NP_196816 | -----GGK-SVYG-----                | -RTFKDENFKL-          |
| NP_188932 | -----NEPIHS-----                  | -EELDDEYFILN          |
| NP_191762 | -----GGI-SIYG-----                | -AKFEDENFTL-          |
| NP_190046 | -----TGGQSIWG-----                | -REFEDEFHK--          |
| NP_180557 | -----GGE-SIYG-----                | -QKFADENFKL-          |
| NP_181157 | -----RGGESIYG-----                | -SKFEDEI-----         |
| NP_179251 | -----GGE-SIYG-----                | -SKFKDENFIK-          |
| NP_179709 | -----GGE-SIYG-----                | -AKFEDENFER-          |
| AAK02067  | -----GGE-SIYG-----                | -LKFDDENFEL-          |
| 282869    | -----ESVSVPLEVMP-SGQFEP-----      | -LYRTPLSVQD           |
| T05352    | -----AGESIYA-----                 | -GKFP-----            |
| T49181    | -----GGESIYG-----                 | -GKFSDENFRLD          |
| T05314    | -----DSIYG-----                   | -GVFADEFHSRL          |
| CSZPA     | -----GGK-SIYG-----                | -EKFPDEN----          |
| E313994   | -----RGGTSIYG-----                | -DKFDDEI-----         |
| E1335804  | -----GGK-SIYG-----                | -SRFPDENFKL-          |
| E1331567  | -----GSA-TIFNS-----               | -RTFPDEN-----         |
| 362327    | -----GGE-SIYG-----                | -EKFEDEN-----         |
| 362590    | -----RGGQSIWG-----                | -KPFKDEF-----         |
| E1294518  | -----TGGESIWK-----                | -KDFEDEISP--          |
| T39728    | -----DGGRCVWN-----                | -VLN---KGTRFFKAEFNPSL |
| E1263915  | -----ESIYG-----                   | -EPFAVETHPRL          |
| CSBY      | -----GGK-SIYG-----                | -GKFPDEN----          |
| 330507    | -----GGK-SIYG-----                | -SKFADEN-----         |
| 312324    | -----GGK-SIYG-----                | -DTFPDENFTL-          |
| 357050    | -----SSSSVKGKGC SIYADKEEVKTD----- | -DESFCYGNFEDENLGE-    |
| 348567    | -----GGE-SIYD-----                | -EKFEDEN-----         |
| CSBYC3    | -----PFTVYG-----                  | -PKFDDENFYL-          |
| 363359    | -----ETEMLA-----                  | -PKLPEENHSL-          |
| 338324    | -----GGK-SIFG-----                | -NTFKDENFDV-          |
| TcCyP19   | -----GGR-SIYG-----                | -EKFADESFAG-          |
| TcCyP20   | -----KGGESVFAPEQ-----             | -RYFDDEG----          |
| TcCyP21.1 | -----GGK-SIYG-----                | -TRFDDENLKI-          |
| TcCyP21.3 | -----GGE-SIYG-----                | -MKFPDESFAG-          |
| TcCyP24.3 | -----TGGCSIYG-----                | -VRFKDESFDISK         |
| TcCyP26   | -----GNVSVFG-----                 | -FPFLDESFKGK          |
| TcCyP28   | -----GGE-SIYG-----                | -MNFREDSEFSG-         |
| TcCyP30   | -----EQLSIYG-----                 | -ETFDAPDEVS-          |
| TcCyP35.1 | -----NGGYSCYG-----                | -RYFPNESYAIP          |
| TcCyP35.3 | -----ANHFSSFG-----                | -WGWFSDENKRR-         |
| TcCyP40   | -----GGVSIYG-----                 | -ERFDDENFDVP          |
| TcCyP110  | -----SGGK-----SVF-----            | -GERFEDEGMNAM         |
| AAT44353  | -----GGK-SIYG-----                | -NKFPDENFQL-          |
| EAL37431  | -----GGE-SIYG-----                | -SKFRDENFVY-          |

|            |                                         |
|------------|-----------------------------------------|
| EAL37232   | -----KGGESIYG-----RYFDDEI----           |
| EAL37110   | -----TGGKSIYG-----DSFEDEN----           |
| EAL36265   | -----SSLYQ-----LLNNQKKDSISLELETPKL      |
| EAL35294   | -----GSI-SIYNT-----SYFN DEN----         |
| J68268     | -----GGK-SIYG-----EKFPDES FAG-          |
| J68269     | -----GGK-SIYG-----AKFEDES FAG-          |
| AAQ15626   | -----GGE-SIYG-----LKFPDES FAG-          |
| AAB07896   | -----CGK-SIYG-----EKFPDES FAG-          |
| AAK14937   | -----GGK-SIYG-----AKFEDENFTL-           |
| CAC18541   | -----GSC-SIYGG-----SKFSDEN----          |
| A45000     | -----GGK-SIYG-----SKFEDENFNH-           |
| Q9Y0F5     | -----KGGESIYG-----RYFDDEI----           |
| J47811     | -----GGQ-SIYG-----EKFPDENFQE-           |
| J50388     | -----GGK-SIYG-----RKFD DENIQL-          |
| L46884     | -----GGK-SIYG-----NKFKDEN----           |
| M93420     | -----GGK-SIYG-----RKFD DENFQL-          |
| J50389     | -----GGF-SIYG-----ERFPDENFKL-           |
| E992633    | -----GGF-SIYG-----DRFPDENFKL-           |
| E323073    | -----GGK-SIYG-----RKFD DENFQL-          |
| 352758     | -----GGK-SIYG-----EKFADENLKV-           |
| E1203753   | -----GGK-SIYG-----SKFADESFLG-           |
| CAB58290   | -----ASEVDAA-----AQSPDDVPLL-            |
| CAB58298   | -----GGE-SIYG-----TTRDESFSG-            |
| AAF69736   | -----GGVSIYG-----EKFEDENFTIP            |
| AAD46565   | -----GGK-SIYG-----EKFADENLNV-           |
| A53522     | -----TGGHSIYG-----RRFD DEN----          |
| NP_702112  | -----EYAFS-----SPFKNEYNSRL              |
| NP_701512  | -----GLSIYG-----KKFPDENFDM-             |
| NP_701389  | -----YGGESIYG-----QYFRNEKFIYK           |
| NP_701030  | -----KGGQSIYG-----KYFEDEF----           |
| NF01067443 | NSLKKNMKNSKKNKYEKVECIYG-----NYYNKEYSKR- |
| NF01067965 | -----GCI-SIYG-----EHFD DEN----          |
| NF01065889 | -----TGGESIWG-----NEFEDEFDD--           |
| NF00926916 | -----GGE-SIYG-----RSFTDENFNM-           |
| 352760     | -----TGGLSIYG-----KKFEDEN----           |
| J10322     | -----GCI-SIYG-----EHFD DEN----          |
| CAB39039   | -----GGE-SIYG-----RSFTDENFNM-           |
| CAD51648   | -----KGGKSIYG-----EYFEDEI----           |
| NF01497907 | -----GGE-SIYG-----RSFTDENFKM-           |
| NF01497552 | -----TGGESIWG-----SEFEDEFDD--           |
| NF01497379 | -----TGGLSIYG-----SRFEDEN----           |
| NF01497199 | -----GSL-SIYG-----EKFD DEN----          |
| NF01496968 | NNLLTN-----KNKYEKIECIYG-----ETYNKEYSQR- |
| NF01495390 | -----GLSIYG-----KKFPDENFDM-             |
| NF01495324 | -----KGGKSIYG-----EYFEDEI----           |
| NF01493974 | -----YGGESIYG-----QYFRNEKFIYK           |
| NF01493918 | -----TLLLHEQNIYNEYAFK-----EPFKNECNSRL   |
| E316521    | -----GGK-SIYG-----EKFADEN----           |
| CAC35733   | -----TVY-----NQPYFEDQINPLL              |
| J47812     | -----GGE-SIYG-----EKFEDENFKE-           |
| J47813     | -----GGE-SIYG-----EKFPDENFQE-           |
| 32624966   | -----GGK-SIYG-----TKFADEA----           |

|            |                     |              |
|------------|---------------------|--------------|
| E1317902   | -----KGGDSIWG-----  | KPFKDEI----  |
| E1319851   | -----KGGDSIWG-----  | KPFKDEV----  |
| E3057040   | -----KGGDSIWG-----  | KPFKDEF----  |
| AAB81959   | -----GGK-SIYG-----  | EKFEDENFIL-  |
| AF023860   | -----GGK-SIYG-----  | EKFEDENFIL-  |
| AAB81961   | -----GGK-SIYG-----  | EKFEDENFIL-  |
| AAF22215   | -----GGK-SIYG-----  | EKFEDENFLL-  |
| AF243140_1 | -----GGK-SIYG-----  | EKFDDENFIL-  |
| AF252388   | -----GGK-SIYG-----  | SRFPDENFTL-  |
| CSBOAB     | -----GGK-SIYG-----  | EKFDDENFIL-  |
| NF01922219 | -----GGK-SIYG-----  | AKFADENWNH-  |
| NF01725587 | -----GGK-SIYG-----  | EKFADENFTL-  |
| NF01897292 | -----TGSISIYG-----  | DTFDDEN----  |
| CSHYAC     | -----GGR-SIYG-----  | EKFEDENFIL-  |
| NF00071027 | -----GGK-SIYG-----  | EKFEDENFIL-  |
| NF01951405 | -----TGGESYWG-----  | KPFKDEF----  |
| NF01059378 | -----GGK-SIYG-----  | EKFEDENFIL-  |
| NF01105745 | -----GGE-SIYG-----  | EKFDPDENFLL- |
| NF00495096 | -----GGR-SIYG-----  | EKFEDENFIL-  |
| NF01053198 | -----GGE-SIYG-----  | AKFADENFIK-  |
| CSPGA      | -----GGK-SIYG-----  | EKFDDENFIL-  |
| NF01950932 | -----KGGTSIWG-----  | KKFEDEF----  |
| NF01951326 | -----GGE-SIYG-----  | EKFEDEN----  |
| NF00909389 | -----GGE-SIYG-----  | AKFADENFVK-  |
| NF01286555 | -----GGE-SIYG-----  | AKFADENFVK-  |
| NF01737225 | -----GGE-SIYG-----  | MKFKDENFTK-  |
| NF01590839 | -----SGG-----P----- | GYRFPDEIVEDL |
| AAH51602   | -----RGGASIYG-----  | KQFEDEI----  |
| AAT69672   | -----GGK-SIYG-----  | NKFADENFTL-  |
| AAH54186   | -----GGK-SIYG-----  | NKFADENFTL-  |
| AAH54168   | -----GGK-SIYG-----  | DRFPDENFKL-  |
| NF01208049 | -----TGGESFWG-----  | KPFKDEI----  |
| NF01844632 | -----GGE-SIYG-----  | GFFEDENFSV-  |
| NF01844615 | -----ESVFG-----     | KPFRDEFHSRL  |
| NF01915773 | -----RGGASIYG-----  | KQFEDEI----  |
| NF01915657 | -----KGGQSIWG-----  | RKFEDEY----  |
| NF01557564 | -----GGE-SIYG-----  | EKFEDEN----  |
| AAH41536   | -----GGK-SIYG-----  | EKFADENFTL-  |
| AAH85963   | -----GGE-SIYG-----  | GFFEDESFAV-  |
| AAH64250   | -----GVA-SIYRG----- | PFADEN----   |
| AAH61335   | -----GGE-SIYG-----  | EKFEDEN----  |
| AAH59741   | -----GGK-SIYG-----  | NKFADENFQL-  |
| AAH67931   | -----GGE-SIYG-----  | GFFEDENFSI-  |
| AAH44993   | -----TGGESFWG-----  | KPFKDEI----  |
| A40516     | -----GGK-SIYG-----  | DRFPDENFKL-  |
| CYPB_BOVIN | -----GGK-SIYG-----  | ERFPDENFKL-  |
| AAR19276   | -----GGK-STYG-----  | EKFADENFIL-  |
| A46579     | -----GGE-SIYG-----  | EKFEDEN----  |
| AAV40687   | -----GGE-SIYG-----  | EKFEDGE----- |
| NF01637248 | -----GGK-SIYG-----  | EKFADEN----  |
| CYPR_BOVIN | -----GGR-SIYG-----  | DKFEDENFDV-  |
| CYPR_CALVI | -----TGSTSIYG-----  | DFEQDE-----  |

|            |                                                     |                      |
|------------|-----------------------------------------------------|----------------------|
| E1317906   | -----HGGESIWG-----                                  | KPFTDQF----          |
| AAB87888   | -----GGK-SIYG-----                                  | NKFPDENFLL--         |
| AAB87889   | -----GGK-SIYG-----                                  | NKFADENFQL--         |
| Q9XZZ5     | -----GGK-SIYG-----                                  | EKFQDENFTL--         |
| 363995     | -----GGK-SIYG-----                                  | TKFEDENFQL--         |
| E1703696   | -----GGK-SIYG-----                                  | EKFADENFTL--         |
| J36797     | -----GGK-SIYG-----                                  | NKFEDENFKL--         |
| AF017738   | -----ESIYT-----                                     | TSFKNEFHQRL          |
| L37292     | -----GGE-SIYG-----                                  | GMFDDEEFVM--         |
| AAS01736   | -----GGE-SIYG-----                                  | AKFADENFVR--         |
| AAO61985   | -----VGGEILYS-----                                  | KTFIDFNIF--          |
| CAC80550   | -----GGE-SIYG-----                                  | AKFADENFIK--         |
| AAO63777   | -----GGE-SIYG-----                                  | AKFADENFVK--         |
| 353522     | -----GGE-SIYG-----                                  | EKFADENFSY--         |
| E280557    | -----YGGLSIYG-----                                  | KYFNDE-----          |
| J70827     | -----GGE-SIYG-----                                  | GMFDDEEFVM--         |
| J70884     | -----GGE-SIYG-----                                  | GMFDDEEFVM--         |
| J55771     | -----TGSISIYG-----                                  | DMFEDEN-----         |
| Q1024669   | -----GGR-SIYG-----                                  | ERFPDENFKL--         |
| 227879     | -----GGE-SIYG-----                                  | NKFADENFK--          |
| AAD48910   | -----GGE-SIYG-----                                  | KKFNDE-----          |
| AAO51811   | -----GRT-SIYGE-----                                 | R-FADEN-----         |
| AAF76472   | -----KGGTSIWG-----                                  | KKFNDE-----          |
| AAP80861   | -----GGE-SIYG-----                                  | TKFGDENFKL--         |
| AAP73848   | -----GCT-SIYGT-----                                 | KFDDEN-----          |
| 3AB62329   | -----RGGESIYG-----                                  | AKFEDE-----          |
| AAL75728   | -----GGESALDG-----A-----                            | ARHFPDEGFAV--        |
| 348017     | -----GGE-SIYG-----                                  | EKFADEVFKF--         |
| 348018     | -----GGE-SIYG-----                                  | DRFADENFKL--         |
| 3AD53622   | -----GGE-SIYG-----                                  | TKFADENFKI--         |
| 3AD53621   | -----GGE-SIYG-----                                  | TKFADENFKI--         |
| 3AD53620   | -----GCD-SIYG-----                                  | GMFPDENFKI--         |
| KP_507188  | -----GEVQPPTGLVRN-----                              | AETIDPKAFEL--        |
| KP_483750  | -----TGGQSIWG-----                                  | REFEDEFHK--          |
| KP_483749  | -----DGHLKFWKKKPAG-----                             | IEFAKHFRSHLSPIE      |
| KP_482125  | IDPSTGKVRTIPLELMV-DGDKAP-----                       | VYGETLEELG           |
| KP_478742  | -----KGYTVPLEVMP-AGQFEP-----                        | LYRTPLSIQD           |
| KP_478741  | -----KGYTVPLEVMP-AGQFEP-----                        | LYRTPLSIQD           |
| NP_385690  | -----TGGEQFNPSRAGMGGSSKP-----                       | DLKAEFSDVS           |
| NP_385689  | -----DMKDGFGQDRAGTGGSSKP-----                       | NLPAEFSDVP           |
| NP_349373  | -----MGG-----P-----                                 | GYAIKGEFSSNG         |
| 3AD45990   | -----SFPGYSFFLVFLSLHYFVHIQNYLFSRFLSGAMATRFDDDEIHPDL |                      |
| 3AD45991   | -----GDSVY-----                                     | KFLYGDQA-RFFDDEIRPDL |
| NP_908419  | -----AVTERLAAEMG-----                               | AVRAQCGGER           |
| NP_919903  | -----PGE--VDG-----                                  | QLTKKRIPAK           |
| 3AD35839   | -----GGE-SIYG-----                                  | LKFEDENFVL--         |
| AAU87301   | -----GGE-SIYG-----                                  | EKFADENFVK--         |
| CAG90469   | -----GGK-SIYG-----                                  | GKFDDENFEL--         |
| CAG88330   | -----GGK-SIYG-----                                  | EKFRDEN-----         |
| CAG88054   | -----TDGDAINS-----                                  | FGDVNVNNTTVKQNKYLPVP |
| CAG86818   | -----TGGESYWG-----                                  | GYIKDEFNS--          |
| NF01109982 | -----GGK-SIYG-----                                  | EKFADENFQL--         |

|            |                                   |                      |
|------------|-----------------------------------|----------------------|
| NF00686348 | -----GSGGSSLP-----                | NLPAEFNDMP           |
| NF00686217 | -----GSGGSSLP-----                | NLPAEFNDMP           |
| NF02138644 | -----GGE-SIYG-----                | AKFADENFKN-          |
| NF00926921 | -----GGK-SIYG-----                | NKFEDENFKL-          |
| NF00909931 | -----GGE-SIYG-----                | AKFADENFVK-          |
| NF00956595 | -----GGK-SIYG-----                | RKFDDENFVL-          |
| NF02035209 | -----GGE-SIYG-----                | SKFEDQNFER-          |
| NF01329591 | -----ERA-----T-----               | KSPIINEANNG-         |
| CAG86678   | -----PADTKINTTNG-----             | YISKEFQYSNARG-       |
| CAG86274   | -----YGGHVSVYNN-----              | KGRFRDEN----         |
| CAG85447   | -----                             | ATLKLKDEFHSRL        |
| CAG85287   | -----GGR-SIYG-----                | QKFSDEN----          |
| CAG84900   | -----GGE-SIYG-----                | EKFEDEN----          |
| CAG84822   | -----YPNLNVGKGGISYNNEA-----       | FEDENLSEP            |
| CAG84723   | -----GSI-SIYGG-----               | NTFDDE----G          |
| CAG79895   | -----GGE-SIYG-----                | RKFPDENFQL-          |
| CAG78939   | -----SGGESIFG-----                | KTFRDECG-T-          |
| CAG82238   | -----GGE-SIYG-----                | EKFPDEA----          |
| CAG81980   | -----GGK-SIYG-----                | AKFPDEN----          |
| CAG81971   | -----GGK-SIYG-----                | QKFPDEN----          |
| CAG81844   | -----GTV-SIFGS-----               | ASFPDERTISG          |
| CAG84141   | -----                             | SYPKLKDEPHTRI        |
| CAG84091   | -----DGTGGTSIYGDO-----            | FDDENFVHN            |
| CAG83821   | -----DGEFPPIES-----               | PGWCDLS----          |
| CAG76968   | -----QKA-----P-----               | NAPIKNEADNG-         |
| CAG62671   | -----LSDKVGLGGCSIYATEEEIKDDT----- | KELQCHGLFEDENVGE-    |
| CAG76052   | -----QKE-----T-----               | NATIKNEANNG-         |
| CAG59915   | -----GGK-SIYG-----                | NKFADEN----          |
| CAG58658   | -----GGK-SIYG-----                | GKFPDEN----          |
| 33777556   | -----GGK-SIYG-----                | EKFEDENFTL-          |
| AAF65770   | -----GGE-SIYG-----                | AKFADENFIK-          |
| 3AA25755   | -----GGE-SIYG-----                | SKFADENFIK-          |
| CSTO       | -----GGE-SIYG-----                | AKFN DENFVK-         |
| CSRP       | -----GGE-SIYG-----                | MKFKDENFVK-          |
| CSZM       | -----GGE-SIYG-----                | EKFPDEK FVR-         |
| CYPH_ALLCE | -----GGE-SIYG-----                | AKFKDENFIK-          |
| AAG01536   | -----GGE-SIYG-----                | AKFADESFRG-          |
| AAB51386   | -----GEEKSIYG-----                | AKFKDENFVK-          |
| 354833     | -----GGE-SIYG-----                | AKFADENFVK-          |
| K85185     | -----GGE-SIYG-----                | AKFADENFIK-          |
| Y08273     | -----GGE-SIYG-----                | AKFADENFVK-          |
| Y08320     | -----GGE-SIYG-----                | AKFADENFVK-          |
| E1226445   | -----GAE-SIYG-----                | AKFADENFIK-          |
| L32095     | -----GGV-SIYG-----                | SKFEDESFDL-          |
| CAA10766   | -----GCI-SIYGS-----               | KFEDEN----           |
| AAF69796   | -----GGK-SIYG-----                | NKFADEE----          |
| AAF69795   | -----GGK-SIYG-----                | NKFADEN----          |
| CSNCM      | -----GGK-SIYG-----                | EKFADEN----          |
| NF01287451 | -----SDGGQSIWG-----               | LLSGD-PSEKTFPALFHPKL |
| NF01527836 | -----ENPKGGRSIYG-----             | PTFEDEI----          |
| NF01488902 | -----RGGSSIYG-----                | EKFEDEI----          |
| NF00648058 | -----GGE-SIYG-----                | AKFEDEN----          |

|            |                                                |
|------------|------------------------------------------------|
| NF01487278 | -----G GK-SIYG-----DKFPDENFKL-                 |
| NF01486260 | -----TGGESIWG-----KEFEDEFS---                  |
| NF00904102 | -----G GK-SIYG-----DKFPDENFKL-                 |
| NF01484914 | -----SDGGQSIWG-----LLSGD-PSEKTFPALFHPKL        |
| NF01484255 | -----GST-CIYGT-----KSFADEN----                 |
| NF01483993 | -----ESIYDNGALSGDLDPWMDQR-RGKNAGPHGVNFKDEFHSRL |
| NF01533203 | -----GGE-SIYG-----SKFADENFVK-                  |
| NF01483647 | -----RGGSSIWG-----KNFEDEF----                  |
| 371849     | -----G GK-SIYG-----EKFADEN----                 |
| J17900     | -----G GK-SIYG-----ERFADENFKL-                 |
| NF00873669 | -----G GK-SIYG-----AKFADEN----                 |
| NF01527595 | -----G GK-SIYG-----AKFADEN----                 |
| NF01539217 | -----G GK-SIYG-----EKFADEN----                 |
| 01035365   | -----G GK-SIYG-----NKFEDENFKL-                 |
| YP_116397  | -----QKG-----T-----KAPIQNEAANG-                |
| YP_119877  | -----KGG-----P-----GYVFGNEYPTDQ                |
| CAD25897   | -----SGSISIYN-----AEPFSDEN----                 |
| CAD26352   | -----GGR-SIYG-----EKFADEN----                  |
| AAD17998   | -----G GK-SIYG-----AKFKDENFKL-                 |
| 32959712   | -----GGE-SIYG-----EKFADENFKH-                  |
| CSNCC      | -----G GK-SIYG-----EKFADEN----                 |
| AJ006689   | -----GGR-SIYG-----DKFADEN----                  |
| AAF28343   | -----RGGESIYG-----KKFEDEI----                  |
| AAD50375   | -----GGE-SIYG-----RTFNEN-----                  |
| AAK21908   | -----GGE-SIYG-----DKFADENFSL-                  |
| AAG13968   | -----G GK-SVYG-----EKFADEN----                 |
| 3AB58884   | -----G GK-SVYG-----EKFADEN----                 |
| 31363908   | -----G GK-SIYG-----AKFADEN----                 |
| AAD16142   | -----GGR-SIYG-----EKFADEN----                  |
| 31764137   | -----GGE-SIYG-----KKFEDEN----                  |
| Z32674     | -----G GK-SIYG-----EKFADEN----                 |
| JT0686     | -----G GK-SIYG-----EKFADEN----                 |
| CSCK       | -----G GK-SIYG-----TKFADEN----                 |
| NP_986490  | -----G GK-SIYG-----GKFPDEN----                 |
| NP_985014  | -----G GK-SIYG-----ARFPDEN----                 |
| NP_984799  | -----ADEENLGKGGCSIYSQQD-----EEGPCRGAFADENTGE-  |
| NP_984183  | -----GGE-SIYG-----EKFEDEN----                  |
| NP_982586  | -----RFSIHG-----QTFKDENFDI-                    |
| NP_982486  | -----GGR-SIYG-----ATFEDESFAV-                  |
| AAT09096   | -----GGE-SIYG-----EKFEDENFKL-                  |
| YP_014938  | -----TGGESIW-----GESFEDEFSTE-                  |
| NP_951950  | -----PRK-----T-----KFAIKNEATNG-                |
| NP_935388  | -----RLP-----S-----YAPIKNEASNG-                |
| NP_907765  | -----TGGESIWG-----KPFEDERAL--                  |
| 3AC91249   | -----DWKVPYVG-----KTIESYPALY-                  |
| 3AC90551   | IDPATGRERTIPLEIKP-TGAKEP-----VYGRIVET--        |
| 3AC89441   | LDPATGKIRRVPIEIP-EGASQP-----VYGKTLRQAG         |
| 3AC88914   | IDPATRQPRSLPLEIRATTGDGRPGE-----ILYGQTFSLSG     |
| AAV50868   | NSNGSSAG--TVYCDEPIPPVFG-----DYFYPPHES---       |
| AAV82698   | -----DKP-----S-----FEKIANESGNG-                |
| AAV81872   | -----QKE-----T-----RANIENEAPTA-                |
| NP_736022  | -----TGGKSIWNSKDKKKDS-----GNGFVNEISPY-         |

NP\_734780 -----MGGESIY-----GESFEDEFSEE-  
 YP\_085398 -----AGG-----P-----GYSIPCETDGN-  
 NP\_643098 -----DGWAPQVG-----FVDGFPVG-  
 NP\_641352 -----RGG-----P-----GYRFEDETN-NG  
 3AB76758 IDPKTGKYRAIPLEILA-EGDKKP-----TYGITLEDAG  
 YP\_129479 -----EKP-----T-----RDAIVNEANRG-  
 YP\_129310 -----EKE-----T-----RETIKNEASNG-  
 YP\_129032 -----RRD-----S-----YSPIKNESTNG-  
 YP\_101389 -----K GKMLGSGDVG-----YTPVAEFVYP-  
 YP\_087816 -----QKK-----T-----NEAIRNEANNG-  
 YP\_087815 -----EKN-----T-----KAPIKNEANNR-  
 YP\_076496 -----TGG-----P-----GYTIPDEYP-  
 AAT91289 -----GGQ-SIYG-----EKFADEKPG--  
 AAT91260 -----GGQ-SIYG-----EKXADXKPG--  
 NP\_868477 -----GGE-SIYG-----MKFADENFKF-  
 NP\_867717 -----RGG-----P-----GYQFEDEFHPEL  
 NP\_867158 -----TGGs-----NLG-----DFDDEFHPDL  
 NP\_865515 -----NSGKFLMD-----EHDNENS-  
 NP\_992233 -----QKT-----T-----DAPIKNEANNG-  
 NP\_991569 -----EKT-----P-----KTPIKNEADNG-  
 NP\_280624 -----RGG-----P-----GYEFADEFHDDL  
 3AC18575 -----AGG-----P-----GFQFANEYPTDE  
 3AC16839 -----RGG-----P-----GYNFGDEFHPEL  
 3AB82272 -----MGN-----P-----GYRIKGEFTRNQ  
 3AB99042 -----AGG-----P-----GFSFANEYPTDE  
 3AB97427 -----RGG-----P-----GYTFDEFHPEL  
 3AC08372 IDPKTNQYRAIPLEILV-EGDKYP-----LYGITLEDAG  
 3AC07690 IDPATNRPRYIPLEILG-QGSDTP-----TY---SQAG  
 YP\_072215 -----EKT-----P-----KTPIKNEADNG-  
 YP\_069574 -----QKT-----T-----DAPIKNEANNG-  
 NP\_778719 -----HGG-----P-----GYHFEDETN-NG  
 NP\_245881 -----EKK-----T-----NAPIQNEANNG-  
 NP\_245880 -----QKK-----T-----DAPITNEANNG-  
 NP\_354667 -----NMEKGFNAQRAGTGGSDMA-----DIPAEFSKTP  
 NP\_354666 -----KGSESFNPARAGMGGSEKE-----DLKAEFSAIP  
 NP\_298502 -----RGG-----P-----GYRFEDETN-NG  
 AAN39296 -----GGK-SIYG-----EKFADENFQL-  
 AAQ24380 -----GGK-SIYG-----NKFADENFQL-  
 ZP\_00353225 -----RGG-----P-----GYQFDDEIHPDL  
 ZP\_00244808 -----QKP-----T-----QAPIANEANNG-  
 ZP\_00244807 -----EKK-----T-----GAPIALENRSG-  
 ZP\_00358245 -----SGG-----P-----GYRFRDEVVGNP  
 ZP\_00350273 -----QKP-----T-----NAAIKNEANNG-  
 ZP\_00129494 -----DKK-----G-----HEPIANEAGNG-  
 ZP\_00130259 -----QKE-----T-----REPVQNEADNG-  
 ZP\_00136576 -----EKK-----T-----RAPIKNEADNG-  
 NF01760157 -----MGG-----P-----GYTIKDEFTNH-

CSHUA -----KHTGPGILSMA-----NAG-----PNTNGSQ-FFICTAK  
 NP\_839944 -----KHTGSGILSMA-----NAG-----PNTNGSQ-FFICAAK  
 NP\_115861 -----SEYLNHNVRGVVMSA-----NNG-----PNTNGSQ-FFIT-YG



NP\_570981 -----SEYLKHNVRGVVSM-----NNG-----PNTNGSQ-FFIT-YG  
 NP\_057143 -----HPDLKFTGAGILAMA-----NAG-----PDTNGSQ-FFVT-LA  
 CSHUB -----KHYGPGWVSMA-----NAG-----KDTNGSQ-FFITTVK  
 366681 -----KHTGPGLLSMA-----NSG-----PNTNGSQ-FFLTCDK  
 A57545 -----KHTGPGLLSMA-----NOG-----QNTNNSQ-FVITLKK  
 A41581 -----KHVGPVLSMA-----NAG-----PNTNGSQ-FFICTIK  
 A54204 -----KHYGIGWVSMA-----NAG-----PDTNGSQ-FFITLTK  
 364705 -----RPNLSHTGRGILSMA-----NSG-----PNSNRSQ-FFIT-FR  
 D38552 -----TLRHDRPYTLMA-----NAGS-----NTNGSQ-FFIT-VV  
 NP\_624311 K-----HKKKGTVSMVN-----NGSDQHGSQFLITTGEN  
 G2708309 -----F-KLRHSAPGLLSM-----ANS-----PSTNGCQ-FFITCSK  
 A45981 -----F-HYKHDREGLLSM-----ANAG-----RNTNGSQ-FFITTVP  
 J40763 -----KHNKEFLLSMA-----NRG-----KDTNGSQ-FFITTKP  
 A47328 -----KHDRAFLLSMA-----NRG-----KHTNGSQ-FFITTKP  
 KP\_531396 -----KHTGPGLLSMA-----NAG-----PNTNGSQ-FFICTAK  
 KP\_525294 -----KHTGPGLLSMA-----NAG-----PNTSGSQ-FFICTAK  
 KP\_523512 -----KHTCPGILSMA-----NAG-----PNTNGSR-FFICTAK  
 KP\_507866 -----KHVGPVLSMA-----NAG-----PNTNGSQ-FFICTIK  
 KP\_517783 -----KHTGPGLLSMA-----SAG-----PNINGSQ-FFICTAK  
 KP\_517773 -----KHTGSGILSMA-----NAG-----PNTNGSQ-FFICTAK  
 KP\_526904 -----KHTGPGLLSVA-----NAG-----PNTNGSQ-FFICTAK  
 KP\_516556 -----KHTGPGLLSMA-----NAG-----PNTSGSQ-FS-----  
 KP\_526001 -----RHRVPGILSM-----  
 KP\_516021 -----SEYLKHNVRGVVSM-----NNG-----PNTNGSQ-FFIT-YG  
 KP\_515886 -----KHNKEFLLSMA-----NRG-----KDTNGSQ-FFITTKP  
 KP\_525218 -----KHTGSGILSVA-----NAG-----PNTNGSQ-FFICAAK  
 KP\_507684 -----KHTGPGLLSMA-----NAG-----PNTNGSQ-FFICTAK  
 KP\_524688 -----F-KLRHSAPGLLSMLTWPBKLTAGIFGFYQANS-----PSTNGCQ-FFITCSK  
 KP\_513346 -----KHTGPGLLSMA-----NSG-----PNTNGSQ-FFLTCDK  
 KP\_524598 -----KHTGPGLLSMA-----NAG-----PNTNGSR-FFICTAK  
 KP\_515004 -----PNLSHTGRGILSMA-----NSG-----PNSNKSQ-LRVADFL  
 KP\_523437 -----KHTGPGLLSLA-----NAG-----PNTNGSQ-FSTRTAK  
 KP\_520485 -----KHTGPGLLSMA-----NAE-----PNTNGSQ-FCG-----  
 KP\_519076 -----KHTGPGLLSMA-----NAG-----PNTNGSQ-FFICTAK  
 KP\_527705 -----KRTGPGLLSMA-----NSG-----PNTNCSV-FHLHCQD  
 KP\_527529 K-----HKKKGTVSMVN-----NGSDQHGS-----  
 KP\_518678 K-----HKKKGTVSMVN-----NGSDQHGSQFLITTGEN  
 CSMSA -----KHTGPGLLSMA-----NAG-----PNTNGSQ-FFICTAK  
 NP\_598845 -----KHVGPVLSMA-----NAG-----PNTNGSQ-FFICTIK  
 AAH58369 -----HPDLKFTGAGILAMA-----NAG-----PDTNGSQ-FFVT-LA  
 A56861 -----KHYGPGWVSMA-----NAG-----KDTNGSQ-FFITTVK  
 A40047 -----KHYGIGWVSMA-----NAG-----PDTNGSQ-FFITLTK  
 NKCR\_MOUSE -----KHDRAFLLSMA-----NRG-----KHTNGSQ-FFITTKP  
 AAH61645 -----SEYLKHNVRGVVSM-----NNG-----PNTNGSQ-FFIT-YG  
 3AC41068 -----RPNLSHTGRGVLMA-----NSG-----PNTNKSQ-FFIT-FR  
 3AC34686 -----F-HYKHDREGLLSM-----ANAG-----PNTNGSQ-FFITTVP  
 3AB30711 K-----HKKKGTVSMVN-----NGSDQHGSQFLITTGEN  
 3AB25645 -----F-KLRHSAPGLLSM-----ANS-----PSTNGCQ-FFITCSK  
 3AB23880 -----F-KLRHSAPGLLSM-----ANS-----PSTNGCQ-FFITCSK  
 NF00527760 -----KHTGPGLLSMA-----NYG-----QNTNSSQ-FFITLKK  
 NF01138503 -----TLRHDRPYTLMA-----NAGS-----NTNGSQ-FFIT-VV  
 NF00510830 -----KHTGPGLLSMA-----NSG-----PNTNGSQ-FFLTCDK

|              |                            |          |                        |
|--------------|----------------------------|----------|------------------------|
| NF00510932   | -----HPDLKFTGAGILAMA-----  | NAG----  | PDTNGSQ-FFVT-LA        |
| NF01595779   | -----KHTGPGILLMA-----      | NAG----  | PNTNGSQ-FFICTAK        |
| NF02014914   | -----KHTGPGILSMA-----      | NAG----  | PNTNSSQ-FFICTAK        |
| NF01930249   | -----KHTGPGILSMA-----      | NAG----  | PNTNGSQ-FFICTVK        |
| NF01929278   | -----KHTGPDILSMA-----      | KAG----  | PNTNDSQ-FFICTAK        |
| NF00523006   | -----KHTGPGILSMA-----      | NAG----  | PNTNGSQ-FFICTAK        |
| NF00508381   | -----KHTGPGILSMA-----      | NAG----  | PNTNGSQ-FFICTAK        |
| NF01215170   | -----SEYLKHNVRGVV SMA----- | NNG----  | PNTNGSQ-FFIT-YG        |
| CSRTA        | -----KHTGPGILSMA-----      | NAG----  | PNTNGSQ-FFICTAK        |
| NP_783638    | -----SEYLKHNVRGVV SMA----- | NNG----  | PNTNGSQ-FFIT-YG        |
| NF01612782   | -----F-HYKHDREGLLSM-----   | ANAG---- | PNTNGSQ-FFITTVP        |
| NF01612825   | -----KHTGPGILLSMA-----     | NSG----  | PNTNGSQ-FFLTCDK        |
| NF01607941   | -----F-HYKHDREGLLSV-----   | ANAG---- | PNTNGSQ-FFITGTP        |
| NF01607846   | -----KHTGPGILSMA-----      | NAG----  | PNTNGSQ-FFICTAK        |
| NF01609144   | -----KHYGIGVVSMA-----      | NAG----  | PDTNGSQ-FFITLTK        |
| NF01608897   | -----KHTGPGILSMA-----      | NAG----  | PNTNGSQ-FFICTAK        |
| NP_758443    | -----KHVGPVLSMA-----       | NAG----  | PNTNGSQ-FFICTIK        |
| AAH61971     | -----KHYGPGVVSMA-----      | NAG----  | KDTNGSQ-FFITTVK        |
| 32828710     | -----KHNKEFLLSMA-----      | NRG----  | KDTNGSQ-FFITTKP        |
| 338388       | -----KHTGSGILLSMA-----     | NAG----  | ANTNGSQ-FFICTVK        |
| AF132148     | N-----HSSAGMLSLVS-----     | -----    | AGKNLVGSQFFLTLGEN      |
| NP_611113    | -----KPNLTHTGRGVLSMA-----  | NSG----  | PNTNGSQ-FFIT-YR        |
| NP_611695    | -----KHYGAGWLSMA-----      | NAG----  | KDTNGSQ-FFITTKQ        |
| NP_610590    | -----KETIKHTDRGMVSMA-----  | NNG----  | PANASQ-FFIT-YA         |
| NP_648697    | -----KHTGAGVLSMA-----      | NAG----  | ANTNGSQ-FFICTGK        |
| NP_648508    | R-----YTRRGLVGMANS GK----- | -----    | DDNGSQFFFTFAP-         |
| NP_648338    | H-----NEEGVVSMA-----       | NYGK---  | PNSNNSQ-FFISAAG        |
| NP_476656    | -----ALAVEHNRPYLGMA-----   | NRG----  | PDTNGCQ-FYVTTVG        |
| NP_523874    | -----HGDLRHTGAGILSMA-----  | NSG----  | PDTNGSQ-FFIT-LA        |
| NP_523773    | -----KHNSFGTLSMA-----      | NSG----  | ANTNGSQ-FFICTTK        |
| NP_610224    | -----F-TLKHDSPGLLSM-----   | ANSG---- | KETNGCQ-FFITCAK        |
| NP_733246    | -----KHDRPFLLSMA-----      | NRG----  | KNTNGSQ-FFITTQP        |
| NP_611935    | -----SLKHDRPYTVSMA-----    | NAGP---  | NTNGSQ-FFIT-VL         |
| EAA03569     | H-----EDGAVSMA-----        | NL GK--- | AHTNNSQ-FFITSGE        |
| EAA03948     | -----KHYGAGWLSMA-----      | NAG----  | KDTNGSQ-FFITVKQ        |
| EAA04625     | -----F-LLKHDAPGLLSM-----   | ANSG---- | KDTNGCQ-FFITCSK        |
| EAA06299     | -----KHTGPGILSMA-----      | NAG----  | PNTNGSQ-FFITTVK        |
| EAA08127     | -----KHDRAFLLSMA-----      | NRG----  | KNTNGSQ-FFITTQP        |
| EAA09839     | -----KPNLSHAGRGILSMA-----  | NSG----  | PNTNGSQ-FFIT-YR        |
| EAA10133     | -----TLKHDRPYTVSMA-----    | NAGP---  | NTNGSQ-FFIT-VL         |
| EAL39647     | K-----HSEPGLLSMVN-----     | -----    | AGEHLIGSQFFFTLGPD      |
| EAA13913     | -----KENLKHNERGMVSMA-----  | NSG----  | PNTNGSQ-FFFT-YA        |
| EAA13914     | -----NLKINHTCSGFIAMA-----  | NRG----  | PNTNGCQ-FYITTL P       |
| EAA14200     | -----KHTGFGVLSMA-----      | NSG----  | PNTNGSQ-FFICTEK        |
| EAA01474     | -----DDTKILAIRG-----       | -----    | SVGMRRSQKRHDNMGLVGSQFR |
| KP_321072    | -----DDTKILAIRG-----       | -----    | SVGMRRSQKRHDNMGLVGSQFR |
| KP_320182    | -----HSDLKHTGAGIVSMA-----  | NSG----  | PDTNGSQ-FFIT-LG        |
| KP_319131    | -----NLKINHTCSGFIAMA-----  | NRG----  | PNTNGCQ-FYITTL P       |
| KP_311949    | -----KHDRAFLLSMA-----      | NRG----  | KNTNGSQ-FFIGHTL        |
| CAI11739     | -----SHNKRIGILGMA-----     | NOG----  | AHSNGSQ-FYITLQP        |
| AAQ91263     | -----KHGGKGTLSMA-----      | NAG----  | PNTNGSQ-FFICTAD        |
| NP_001004626 | -----KHTGAGILLSMA-----     | NSG----  | PNTNGSQ-FFICTAK        |

|              |                                                  |
|--------------|--------------------------------------------------|
| NP_001002065 | -----F-HYKHDREGLLSM-----ANAG-----PNTNGSQ-FFITTVP |
| NP_957499    | -----F-RMKHSGPGLLSM-----ANS-----PGTNGCQ-FFITCTK  |
| AAQ94596     | -----F-RMKHSGPGLLSM-----ANS-----PGTNGCQ-FFITCTK  |
| NP_998184    | -----KHYGPGWLSMA-----NAG-----KDTNGSQ-FFITTVQ     |
| NP_001002146 | -----SEHLKHNVRGVVAMA-----NNG-----PNTNASQ-FFFT-YA |
| AAQ91264     | -----KHTGAGCLSMA-----NAG-----PNTNGSQ-FFICTAL     |
| AAH59458     | -----KHTGAGCLSMA-----NAG-----PNTNGSQ-FFICTAL     |
| AAH56814     | K-----HRKKGTVSMVN-----NGSDQHGSQFLITTGEN          |
| AAH62863     | -----KHTGAGCLSMA-----NAG-----PNTNGSQ-FFICTAL     |
| NP_998629    | -----KHTKEFLLSMA-----NRG-----KDTNGSQ-FFITTKP     |
| NP_957285    | -----RPNLSHTGRGILSMA-----NSG-----PNTNKSQ-FFIT-FR |
| NP_506749    | -----KHTGPGVLSMA-----NAG-----PNTNGSQ-FFLCTVK     |
| NP_506561    | -----KHTGPGCLSMA-----NAG-----PNTNGSQ-FFICTVD     |
| NP_504522    | -----TVQNTRGKVILLPS-----DTN-----PTVFSSLFYVLLDKS  |
| NP_506751    | -----KHTGPGVLSMA-----NAG-----PNTNGSQ-FFLCTVK     |
| NP_497745    | -----KHSRPYLLSMA-----NKG-----PNSNSSQ-FFITTA      |
| NP_499828    | -----KHTGPGVLSMA-----NCG-----ANTNGSQ-FFLCTVK     |
| NP_497257    | -----QHYGPGWLSMA-----NAG-----EDTNGSQ-FFITTAK     |
| NP_509506    | -----KHKKPYLLSMA-----NRG-----PDTNGSQ-FFITSEE     |
| NP_503034    | -----RHTMPGTVSMA-----NCG-----ANTNGSQ-FFICTEK     |
| NP_501118    | -----DERLKHTGAGILSMA-----NAG-----PNTNGSQ-FFIT-LA |
| NP_496562    | K-----FNRRGIVGMANAGR-----DDNGSQFFFTIGDR          |
| NP_495855    | -----F-ELKHIGPGMLSM-----ANAG-----SDTNGCQ-FFITCAK |
| NP_496337    | -----ISGFSDHARGVLSMA-----NKG-----SNTNGSQ-FFIT-FR |
| NP_495417    | -----VSALKHDSRGCVSMA-----NNG-----PDSNRSQ-FFIT-YA |
| NP_493378    | -----RLRHDKPFKVSMA-----NAGGG-----NTNGSQ-FFIT-VC  |
| NP_492343    | R-----HTRMGIVSFVN-----NGDNMLGSQFFITLGEN          |
| NP_493624    | -----KHYGAGWLSMA-----NAG-----ADTNGSQ-FFITTVK     |
| T06073       | -----KHTGPGILSMA-----NAG-----ANTNGSQ-FFICTVK     |
| NP_175776    | K-----HSKTGTVAMAS-----GGENLNASQFYFTLRDD          |
| NP_567029    | -----KHTGPGFLSMA-----NSG-----PDSNGSQ-FFITTVT     |
| NP_201554    | -----NSKLLHSGRGVVSMA-----NSG-----PHTNGSQ-FFVL-YK |
| NP_200679    | -----KHTGPGFLSMA-----NAG-----QDTNGSQ-FFITTVT     |
| NP_181407    | -----F-TAKHTGPGLLSM-----ANS-----PNTNGCQ-FFITCAK  |
| NP_191166    | -----KHTGPGILSMA-----NSG-----PNTNGSQ-FFICTEK     |
| NP_171696    | -----RDSLKHNARGMLSMA-----NSG-----PNTNGSQ-FFIT-YA |
| NP_195222    | -----QHSHAGMVAMA-----NTG-----PDSNGSQ-FFITTVK     |
| NP_195213    | -----KHTGAGILSMA-----NSG-----PNTNGSQ-FFICTDK     |
| NP_196816    | -----SHVGPVLSMA-----NAG-----PNTNGSQ-FFICTIK      |
| NP_188932    | H-----EDGPGIISMA-----DS-----NGSQ-FQIHMKD         |
| NP_191762    | -----KHTGPGILSMA-----NAG-----PNTNGSQ-FFICTVK     |
| NP_190046    | -----SLRHDRPFTLSMA-----NAGP-----NTNGSQ-FFIT-TV   |
| NP_180557    | -----KHTGPGVLSMA-----NSG-----EDTNGSQ-FFITTVT     |
| NP_181157    | -----NKELKHTGAGILSMA-----NAG-----PNTNGSQ-FFIT-LA |
| NP_179251    | -----KHTGPGILSMA-----NAG-----ANTNGSQ-FFICTEK     |
| NP_179709    | -----KHTGPGILSMA-----NAG-----ANTNGSQ-FFICTVK     |
| AAK02067     | -----KHERKGMLSMA-----NSG-----PNTNGSQ-FFITTR      |
| ?82869       | -----GELPVLPLSVYGAVAMAHSEN-----SEEYSSPYQFFFYLYDK |
| T05352       | -----GWFTTA-----IFN-----SN-----L-FTITLAR         |
| T49181       | H-----DGAGVLSMA-----NCG-----PNTNGSQ-FFILFKR      |
| T05314       | R-----FSHRGIVAMANASSP-----NSNGSQFFFTLDK-         |
| CSZPA        | -----FALKHNKPGLLSMA-----NAG-----PNTNGSQ-FFITTVV  |

|           |                              |       |                             |
|-----------|------------------------------|-------|-----------------------------|
| 313994    | -----HSDLHHTGAGILSMA-----    | NAG   | -----PNTNSSQ-FFIT-LA        |
| 31335804  | -----SHQRPGLLSMA-----        | NAG   | -----PDSNGSQ-FFITTVK        |
| 31331567  | -----F-TLKHDRPGLLSM-----     | ANAG  | -----KDSNGCQ-FFITTVP        |
| 362327    | -----F-ELKHDKPFLLSM-----     | ANAG  | -----PNTNGSQ-FFITTVP        |
| 362590    | -----CNPLKHDDRGIISMA-----    | NRG   | -----KNTNGSQ-FFIL-YG        |
| 31294518  | -----NLKHDRPFTVSMA-----      | NSGP  | -----NTNGSQ-FFIT-TD         |
| 339728    | V-----HNKMGLVSMSTATISSR----- |       | -----DDKLLVCGSQFIITLSDN     |
| 31263915  | R-----FIRRGVLGMACTEN-----    |       | -----EGNNSQFFITLGP-         |
| CSBY      | -----FKKHDRPGLLSMA-----      | NAG   | -----PNTNGSQ-FFITTVP        |
| 330507    | -----FVKKHDKAGLLSMA-----     | NAG   | -----PNTNGSQ-FFITTVP        |
| 312324    | -----KHDRKGRLSMA-----        | NRG   | -----KDTNGSQ-FFITTE         |
| 357050    | -----FVEPFTLGMA-----         | NLGS  | -----PNTNNSQ-FFITTYA        |
| 348567    | -----F-TVKHDKPFLLSM-----     | ANAG  | -----PNTNGSQ-AFITCVP        |
| CSBYC3    | -----KHDRPERLAMAYFG-----     |       | -----PDSNTSE-FIITTKA        |
| 363359    | -----IHDRPGRVSMIK-----       |       | -----DDKGLK-FIIEETSE        |
| 338324    | -----KHDKPGRLSMA-----        | NRG   | -----KNTNGSQ-FFITTVP        |
| 3cCyP19   | -----KAGKHFGGLTLSMA-----     | NAG   | -----PNTNGSQ-FFICTAP        |
| 3cCyP20   | -----LGTVHHDSRGVVSMA-----    | HRGN  | -----KPNTNASQ-FFII-FQ       |
| 3cCyP21.1 | -----KHF-VGAVSMA-----        | NAG   | -----PNSNGSQ-FFVTTAP        |
| 3cCyP21.3 | -----RAGKHFGPGTLSMA-----     | NAG   | -----PNTNGSQ-FFICTAA        |
| 3cCyP24.3 | A-----GAHKGPGLLSMA-----      | NAG   | -----RNTNGSQ-FFICTVS        |
| 3cCyP26   | AG-----KHLPGTVAMA-----       | HSG   | -----PNQNGSQ-FFFNMRR        |
| 3cCyP28   | -----KAGKHTGVGCLSMA-----     | NAG   | -----PNTNGSQ-FFICTAN        |
| 3cCyP30   | -----SSVFDQRGLVGTAVS-----    |       | -----APHLNGSQ-FFILTAK       |
| 3cCyP35.1 | -----HDAPGVI GMC-----        | NDN   | -----EDTNASS-FYITMKA        |
| 3cCyP35.3 | -----RLNEVGLLLMA-----        | NNG   | -----PNSNGSQ-FFITTS         |
| 3cCyP40   | -----CDKAGLLAMA-----         | NAG   | -----PNTNGSQ-FFITVNP        |
| 3cCyP110  | DFFS-----YPSVYWLCMA-----     | NCGP  | -----NTNESQ-FFITVGE         |
| 3AAT44353 | -----KPLGPGTLSMA-----        | NAG   | -----PNTNGSQ-FFICTEK        |
| 3EAL37431 | -----THDAPFLLSMA-----        | NAG   | -----PNTNGSQ-FFITTVP        |
| 3EAL37232 | -----YPELKYDRRGILSMA-----    |       | -----SKGASKKPNTNGSQ-FFIT-YS |
| 3EAL37110 | -----FKFIHESHVISMA-----      | NRG   | -----PNTNGSQ-FFITFTP        |
| 3EAL36265 | K-----HKRMGVLGMVN-----       |       | -----HISKNSLGSEFYFTLKDE     |
| 3EAL35294 | -----F-EIKHTKPGLLSM-----     | ANNGS | -----PNTNGCQ-FFITCNT        |
| 3J68268   | -----KAGKHFGPGTLSMA-----     | NAG   | -----PNTNGSQ-FFICTAR        |
| 3J68269   | -----KAGKHFGPGTLSMA-----     | NAG   | -----PNTNGSQ-FFICTAR        |
| 3AAQ15626 | -----RAGKHFGPGTLSMA-----     | NAG   | -----RNTNGSQ-FFICTAA        |
| 3AAB07896 | -----KAGKHFGAGTLSMA-----     | NAG   | -----PNTNGSQ-FFICTAP        |
| 3AAK14937 | -----KHDRPFLLSMA-----        | NAG   | -----PNTNGSQ-FFVTTVV        |
| 3CAC18541 | -----F-IMKHSSPGMLSM-----     | ANS   | -----KDTNGCQ-FFITCAP        |
| 3A45000   | -----KHSKPMMLSMA-----        | NAG   | -----KNTNGSQ-FFITTAV        |
| 3J9Y0F5   | -----YPELKYDRRGILSMA-----    |       | -----SKGASKKPNTNGSQ-FFIT-YS |
| 3J47811   | -----KHTGLGVLSMA-----        | NAG   | -----PNTNGSQ-FFICTAK        |
| 3J50388   | -----RHEGFGVLSMA-----        | NSG   | -----PNTNGSQ-FFICTTK        |
| 3L46884   | -----FNHKHEAFS-LSMA-----     | NAG   | -----PNTNGSQ-FFITTVP        |
| 3M93420   | -----RHEGFGVLSMA-----        | NSG   | -----PNTNGSQ-FFICTTK        |
| 3J50389   | -----KHVGAGWLSMA-----        | NAG   | -----PNTNGAQ-FFITTTQ        |
| 33992633  | -----RHVGAGWLSMA-----        | NAG   | -----PDTNGSQ-FFITTVK        |
| 33323073  | -----RHEGFGVLSMA-----        | NSG   | -----PNTNGSQ-FFICTTK        |
| 352758    | -----KHF-VGALSMA-----        | NAG   | -----PNTNGSQ-FFITTAP        |
| 331203753 | -----KAGKHFGPGTLSMA-----     | NAG   | -----PNTNGSQ-FFLCTAP        |
| 3AB58290  | -----HVGAGLLSCRIP-----       | TVG   | -----AVTASR-LLITLSP         |

|            |                             |      |                         |
|------------|-----------------------------|------|-------------------------|
| CAB58298   | -----KAGRHTGLGCLSMA-----    | NAG  | -----PNTNGSQ-FFICTAA    |
| AAF69736   | -----CDKSGLLAMA-----        | NAG  | -----ANTNGSQ-FFITTAP    |
| AAD46565   | -----KHF-VGALSMA-----       | NAG  | -----PNTNGSQ-FFITTAP    |
| A53522     | -----FDLKHERGVISMA-----     | NAG  | -----PNTNGSQ-FFITTVK    |
| NP_702112  | K-----FLYTGCLSFANLNIDK----- |      | -----PSNGSQFFITLTK-     |
| NP_701512  | -----EFVQDGDVALFNEG-----    |      | -----PHSNSSQ-FIITFSP    |
| NP_701389  | -----HSKRGILSMC-----        | QTRI | -----KHTNNSQ-FFVTFKS    |
| NP_701030  | -----DSTLKHKDRGIVSMA-----   | NKG  | -----KPNTNGSQ-FFIT-YS   |
| NF01067443 | -----KHTCAGLLTIV-----       | QVE  | -----DKKYSSIFKITLTK     |
| NF01067965 | -----F-DIKHDKEGLLSM-----    | ANTG | -----PNTNGCQ-FFIITKK    |
| NF01065889 | -----HLNHSKPFMVMSMA-----    | NCGP | -----NTNGSQ-FFIT-TV     |
| NF00926916 | -----KHDQPGLLSMA-----       | NAG  | -----PNTNSSQ-FLITLVP    |
| 352760     | -----FKVNHSKRGLLSMA-----    | NAG  | -----KNTNGSQ-FFILFIP    |
| J10322     | -----F-DIKHDKEGLLSM-----    | ANTG | -----PNTNGCQ-FFIITKK    |
| CAB39039   | -----KHDQPGLLSMA-----       | NAG  | -----PNTNSSQ-FFITLVP    |
| CAD51648   | -----NTELKHTGAGILSMS-----   | NNG  | -----PNTNGSQ-FFIT-LC    |
| NF01497907 | -----KHDTPGLLSMA-----       | NAG  | -----PNTNSSQ-FFITLVP    |
| NF01497552 | -----HLNHSKPFMVMSMA-----    | NCGP | -----NTNGSQ-FFIT-TV     |
| NF01497379 | -----FTLKHTKRGMLSMA-----    | NAG  | -----RNTNGSQ-FFILFVP    |
| NF01497199 | -----F-DIKHDKEGLLSM-----    | ANSQ | -----PNTNGCQ-FFITTKK    |
| NF01496968 | -----KHLASAGLLTVI-----      | QVG  | -----KKKCSSIFKITLTK     |
| NF01495390 | -----EFVQDGDVALYNQG-----    |      | -----PHSNSSQ-FIITFAP    |
| NF01495324 | -----NKELKHTGAGILSMS-----   | NNG  | -----PNTNSSQ-FFIT-LA    |
| NF01493974 | -----HSKRGVLSMC-----        | QTSI | -----KHTNNSQ-FFVTFKS    |
| NF01493918 | K-----FLYMGCVAFANLNIBS----- |      | -----PXNGSQFFITLTK-     |
| E316521    | -----FKLKHTKPALLSMA-----    | NAG  | -----PNTNGSQ-FFITFVP    |
| CAC35733   | R-----HNQYGVVATS-----       |      | -----NSKPHANNSDFYILLTON |
| J47812     | -----KHTGPGVLSMA-----       | NAG  | -----PDTNGSQ-FFLCTVK    |
| J47813     | -----KHTGPGVLSMA-----       | NAG  | -----PNTNGSQ-FFICTAK    |
| 32624966   | -----F-TVKHTKPGMLSM-----    | ANAG | -----PNTNGSQ-FFITTVP    |
| E1317902   | -----IRSFHNRGILSMA-----     | NOQ  | -----TDTNKSQ-FFIT-FR    |
| E1319851   | -----ISSLSHDQRGILSMA-----   | NOQ  | -----TDTNKSQ-FFIT-FR    |
| 33057040   | -----KSTFSHRRGVLSMA-----    | NOQ  | -----TDTNKSQ-FFIT-FR    |
| AAB81959   | -----KHTGPGILSMA-----       | NAG  | -----PNTNGSQ-FFICTAK    |
| AF023860   | -----KHTGPGILSMA-----       | NAG  | -----PNTNGSQ-FFICTAK    |
| AAB81961   | -----KHTGPGILSMA-----       | NAG  | -----PNTNGSQ-FFICTAK    |
| AAF22215   | -----KHTGPGILSMA-----       | NAG  | -----PNTNGSQ-FFICTAK    |
| AF243140_1 | -----KHTGPGILSMA-----       | NAG  | -----PNTNGSQ-FFICTAK    |
| AF252388   | -----KHVGPVLSMA-----        | NAG  | -----PNTNGSQ-FFICTIK    |
| CSBOAB     | -----KHTGPGILSMA-----       | NAG  | -----PNTNGSQ-FFICTAK    |
| NF01922219 | -----KHEGKGTLSMA-----       | NAG  | -----PNTNGSQ-FFLCFVK    |
| NF01725587 | -----KHTGPGVLSMA-----       | NAG  | -----PNTNGSQ-FFLCTAR    |
| NF01897292 | -----FDLKHYDEQWVSMA-----    | NNG  | -----PNTNGCQ-FFVLY-D    |
| CSHYAC     | -----KHTGPGILSMA-----       | NAG  | -----PNTNGSQ-FFICTAK    |
| NF00071027 | -----KHTGPGILSMA-----       | NAG  | -----PNTNGSQ-FFICTAK    |
| NF01951405 | -----KPNLSHTGRGILSMA-----   | NSG  | -----PNTNKSQ-FFIT-FR    |
| NF01059378 | -----KHTGPGILSMA-----       | NAG  | -----PNTNGSQ-FFICTAK    |
| NF01105745 | -----KHKGEGILSMA-----       | NAG  | -----PNTNGSQ-FFICTVE    |
| NF00495096 | -----KHTGPGILSMA-----       | NAG  | -----PNTNGSQ-FFICTAK    |
| NF01053198 | -----KHTGPGILSMA-----       | NAG  | -----PGTNGSQ-FFICTAK    |
| CSPGA      | -----KHTGPGILSMA-----       | NAG  | -----PNTNGSQ-FFICTAK    |
| NF01950932 | -----SEYLNKHSVRGVVSMA-----  | NNG  | -----PNTNGSQ-FFIT-YG    |

|            |                                                   |
|------------|---------------------------------------------------|
| NF01951326 | -----F-HYKHKDPGLLSM-----ANAG-----PGTNGSQ-FFITTVP  |
| NF00909389 | -----KHTGPGILSMA-----NAG-----PGTNGSQ-FFICTEK      |
| NF01286555 | -----KHTGPGILSMA-----NSG-----PGTNGSQ-FFICTDK      |
| NF01737225 | -----KHTGPGILSMA-----NAG-----ANTNGSQ-FFICTEK      |
| NF01590839 | KHD-----GPGVLSMA-----NAG-----PGTNGSQ-FFITHVE      |
| AAH51602   | -----HPDLKFTGAGILAMA-----NAG-----PDSNGSQ-FFLT-LA  |
| AAT69672   | -----KHTGPGILSMA-----NAG-----ANTNGSQ-FFICTAK      |
| AAH54186   | -----KHTGPGILSMA-----NAG-----ANTNGSQ-FFICTAK      |
| AAH54168   | -----KHYPFWLSMA-----NAG-----KDTNGSQ-FFITTVK       |
| NF01208049 | -----KPNLSHTGRGVLMSMA-----NTG-----PNTNKSQ-FFIT-FR |
| NF01844632 | -----QHNKEFLLSMA-----NRG-----KDTNGSQ-FFIITKP      |
| NF01844615 | R-----FNRRGLVAMANAGP-----HDNGSQFFFTLGR-           |
| NF01915773 | -----HPDLKFTGAGILAMA-----NAG-----PDSNGSQ-FFLT-LA  |
| NF01915657 | -----SEFLKHSVRGVVMSMA-----NNG-----PNTNASQ-FFIT-YG |
| NF01557564 | -----F-HYKHKDEGLLSM-----ANAG-----PNTNGSQ-FFITTVP  |
| AAH41536   | -----KHTGPGILSMA-----NAG-----SNTNGSQ-FFICTAK      |
| AAH85963   | -----KHNKEFLLSMA-----NRG-----KDTNGSQ-FFITTKP      |
| AAH64250   | -----F-KQKHSTPGLLSM-----ANSQ-----PGTNGCQ-FFITCSK  |
| AAH61335   | -----F-HYKHKDEGLLSM-----ANAG-----PNTNGSQ-FFITTVP  |
| AAH59741   | -----RHTGPGILSMA-----NAG-----ANTNGSQ-FFICTAK      |
| AAH67931   | -----QHNKEFLLSMA-----NRG-----KDTNGSQ-FFITTKP      |
| AAH44993   | -----KPNLSHTGRGVLMSMA-----NTG-----PNTNKSQ-FFIT-FR |
| A40516     | -----KHYPGWVMSMA-----NAG-----KDTNGSQ-FFITTVK      |
| CYPB_BOVIN | -----KHYPGWVMSMA-----NAG-----KDTNGSQ-FFITTVK      |
| AAR19276   | -----KHTGPGILSMA-----NAG-----PNTNGSQ-FFICTEK      |
| A46579     | -----F-HYKHKDEGLLSM-----ANAG-----SNTNGSQ-FFITTVP  |
| AAV40687   | -----F-PVHHSRPFLLSM-----ANAG-----PNTNGSQ-FFITVSA  |
| NF01637248 | -----FQLKHTKPGLLSMA-----NAG-----KNTNGSQ-FFITTVV   |
| CYPR_BOVIN | -----KHTGPGILSMA-----NRG-----QDTNNSQ-FFITLKK      |
| CYPR_CALVI | -----ALDVEHLRPGYLGMA-----NRG-----PDTNGCQ-FYVTTVA  |
| E1317906   | -----VSGFSDARGVLSMA-----NKG-----SNTNGSQ-FFIT-FR   |
| AAB87888   | -----KHTGTGILSMA-----NAG-----ANTNGSQ-FFICTVK      |
| AAB87889   | -----KHTGTGILSMA-----NAG-----ANTNGSQ-FFICTVK      |
| Q9XZZ5     | -----KHQEGTLSMA-----NAG-----PNTNGSQ-FFICTGQ       |
| 363995     | -----KHTGPGILWMA-----NAG-----PNTNGSQ-FFITTAK      |
| G1703696   | -----KHTQPGILSMA-----NAG-----VNTNGSQ-FFICTAV      |
| J36797     | -----KHTGPGILSMA-----NAG-----KNTNGSQ-FFICTTK      |
| AF017738   | K-----FNRRGLVGMASGND-----GMNGSQFFFTLNA-           |
| L37292     | -----KHDEPFVVSMA-----NKG-----PNTNGSQ-FFITTTTP     |
| AAS01736   | -----KHTGPGVLSMA-----NAG-----PGTNGSQ-FFICTVK      |
| AAO61985   | -----LMKIKCFNKLY-----EGKNGVEPLKEIVSS              |
| CAC80550   | -----KHTGPGILSMA-----NAG-----PGTNGSQ-FFICTAK      |
| AAO63777   | -----KHTGPGILSMA-----NSG-----PGTNGSQ-FFICTDK      |
| 353522     | -----KHSEPFLLSMA-----NAG-----PNTNGSQ-FFITTVP      |
| E280557    | -----FKLCHHGFGWLGMA-----NCG-----PNTNGAQ-YYISTVD   |
| J70827     | -----KHDEPFLVSMA-----NKG-----PNTNGSQ-FFITTTTP     |
| J70884     | -----KHDEPFLVSMA-----NKG-----PNTNGPQ-FFITTTTP     |
| J55771     | -----FTAKHKKGVIAMA-----NRG-----PNTNGSQ-FYITTTVA   |
| O1024669   | -----KHYPGAGWLSMA-----NAG-----KDTNGSQ-FFITCKK     |
| 227879     | -----LKHFQGTLSMA-----NAG-----ANTNGSQ-FFICVAP      |
| AAD48910   | -----KHSKPGLLSMA-----NAG-----PNTNGSQ-FFITTVV      |
| AAO51811   | -----F-KIKHSGPGLLSM-----VNSG-----PNSNGCQ-FFITCVA  |

AAF76472 -----RDSLKHNARGMLSMA-----NSG----PNTNGSQ-FFIT-YA  
AAP80861 -----KHTGPGYLSMA-----NAG----RDTNGSQ-FFITTVT  
AAP73848 -----F-IAKHTGPGLLSM-----ANSG----VNSNGSQ-FFITCAK  
3AB62329 -----RPELKHTGAGILSMA-----NAG----PNTNGSQ-FFIT-LA  
AAL75728 -----KHDGPGVVSMA-----NAG----PNTNGSQ-FFITVDK  
348017 -----KHDSPGILSMA-----NAG----PNTNGSQ-FFICTVP  
348018 -----RHTGPGVLSMA-----NAG----PNTNGSQ-FFICTTR  
3AD53622 -----KHTGPGLLSMA-----NAG----RDTNGSQ-FFITTVT  
3AD53621 -----KHTGPGLLSMA-----NAG----RDTNGSQ-FFITTVT  
3AD53620 -----NHSAPGLLSMA-----NYA----KDTNGSQ-FFITTVK  
KP\_507188 -----KHARPGTSLCLGQND-----DDDDIKLNPNYHNVE-FLVTTGP  
KP\_483750 -----SLRHDRPFTLSMA-----NAGP----NTNGSQ-FFIT-TV  
KP\_483749 G-----LAVSVDGLLCCTIS-----SDWSVKIYDVVNYDMMFMMRLPF  
KP\_482125 R---YKAQTKLPFNAFGTMAMARD-E-----FDDNSASSQIFWLLKES  
KP\_478742 -----GELPVLPM SVYGAVAMAHSVD-----SDEYSSPSQFFFYLYDK  
KP\_478741 -----GELPVLPM SVYGAVAMAHSVD-----SDEYSSPSQFFFYLYDK  
NP\_385690 -----HVRGTCSMARS-----QMPNSANSQFFICFTDA  
NP\_385689 -----FERGTVGMARA-----QDPDSANSQFFIMLAPG  
NP\_349373 FQN-----NLKHERGVISMA-----RTGF---PDSAGSQ-FFIMAED  
3AD45990 R-----HSKMGTIAMAS-----AGENCNASQFYITLRDG  
3AD45991 R-----HSKKGTIAMAS-----AGENCNASQFYITLRDD  
NP\_908419 S-----PHAAAGAVSIVVR-----DPSLPPPKPKLVARGG  
NP\_919903 -----VMWYFPIIPRLRR-----LFRNKG NAGMLRWHA E  
3AD35839 -----KHERKGMLSMA-----NSG----PNTNGSQ-FFITTR  
AAU87301 -----KHTGPGILSMA-----NAG----PNTNGSQ-FFICTAQ  
CAG90469 -----KHDRPYRLSMA-----NSG----KNTNGSQ-FFITTVT  
CAG88330 -----FVKKHEKPGLLSMA-----NAG----PNTNGSQ-FFITTVT  
CAG88054 NS-----QHEYVDNSIGLVSFVTKKDTN-----GKDLVIGSQFTISLTEN  
CAG86818 -----LLRHSKPFMV SMA-----NSGP----NTNGSQ-FFIT-TE  
NF01109982 -----KHTGPGILSMA-----NAG----PNTNGSQ-FFLCTAT  
NF00686348 -----HVRGEVSMARA-----QEKDSANSQFFIVYQPT  
NF00686217 -----HVRGEVSMARA-----QEKDSANSQFFIVYQPT  
NF02138644 -----KHTGPGILSMA-----NSG----PNTNGSQ-FFICTEK  
NF00926921 -----RHTKKGVLSMA-----NAG----KDTNGSQ-FFITTAI  
NF00909931 -----KHTGPGILSMA-----NAG----PGTNGSQ-FFICTTK  
NF00956595 -----KHTAPGQLSMA-----NSG----PNTNGSQ-FFITTDK  
NF02035209 -----KHTGPGILSMA-----NAG----PNTNGSQ-FFICTDE  
NF01329591 -----LKNARGTLAMA-----RTSD---PNSATSQ-FFINVAD  
CAG86678 -----WNQIKRGTLTVN-----NAGN---EDGLGSQ-FFISLSN  
CAG86274 -----FKLKHNKQGRMSMA-----NGG----PNTNGGQ-FFITTKD  
CAG85447 K-----FNKRGLVGAVHDDKRN-----SNNVDSL FITLKP-  
CAG85287 -----FQKKHEKAGLLSMA-----NAG----PNTNGSQ-FFITTVP  
CAG84900 -----F-QLTHDKPFLLSM-----ANAG---ANTNGSQ-FFITTVP  
CAG84822 -----LDDPFKLCLA-----NDGT---SNANKSQ-FFITTY P  
CAG84723 -----F-PYDH-KKYSVSM-----ANSG---PNSNGCQ-FFICCKE  
CAG79895 -----KHTKPYKLSMA-----NAG----RDTNGSQ-FFITTVV  
CAG78939 -----FNPHTHDSRGVLSMA-----NRG----KGTNSSQ-FFIT-YS  
CAG82238 -----F-PYPHDQPFLLSM-----ANAG---PNTNGSQ-FFITTE  
CAG81980 -----FEAKHTRPGLLSMA-----NSG----PNTNGSQ-FFVTTVP  
CAG81971 -----FNVKHTRPGLLSMA-----NAG----PNTNGSQ-FFITTV D  
CAG81844 -----K-TFPH-IEGALSM-----ANSG---KDTNGCQ-FFITTRK  
CAG84141 K-----LKRGYLAMASEYTENN-----RRVPNSATTEFFIALKE-

|            |                             |         |                    |
|------------|-----------------------------|---------|--------------------|
| CAG84091   | -----HAEPFVLSMA-----        | NAG---- | PNSNKSQ-FFVTLKG    |
| CAG83821   | -----EGGYLCMAS-----         | NDK---- | GRNLCQ-WFITLEG     |
| CAG76968   | -----LRNQRTIAMA-----        | RTSD--- | KDSATSQ-FFINIAD    |
| CAG62671   | -----FDEPFLLAMA-----        | NTGS--- | PNTNSSQ-FFITTYP    |
| CAG76052   | -----LKNTRGTLAMA-----       | RTND--- | PHSATAQ-FFINLID    |
| CAG59915   | -----FTKTHDKPGLLSMA-----    | NAG---- | PNTNGSQ-FFITTVP    |
| CAG58658   | -----FVKRHERPGLLSMA-----    | NAG---- | PNTNGSQ-FFITTVP    |
| 33777556   | -----KHTGPGTLSMA-----       | NAG---- | PNTNGSQ-FFICTET    |
| AAF65770   | -----KHTGPGILSMA-----       | NAG---- | PGTNGSQ-FFICTAK    |
| 3AA25755   | -----KHTGPGILSMA-----       | NAG---- | PGTNGSQ-FFICTAK    |
| CSTO       | -----KHTGPGILSMA-----       | NAG---- | PGTNGSQ-FFICTAK    |
| CSR        | -----KHTGPGILSMR-----       | NAG---- | SNTNGSQ-FFICTEK    |
| CSZM       | -----KQPAPGVLSMA-----       | NAG---- | PNTNGSQ-FFICTVA    |
| CYPH_ALLCE | -----KHTGPGVLSMA-----       | NAG---- | PGTNGSQ-FFICTEK    |
| AAG01536   | -----KHTGPGVLSMA-----       | IA----  | PGTNGSQFFIICTAE    |
| AAB51386   | -----KHTGAGILSMA-----       | NAG---- | PGTNGSQ-FLICSAK    |
| 354833     | -----KHTGPGILSMA-----       | NAG---- | PGTNGSQ-FFICTTK    |
| K85185     | -----KHTGPGILSMA-----       | NAG---- | PNTNGSQ-FFICTAK    |
| Y08273     | -----KHTGPGILSMA-----       | NAG---- | PGTNGSQ-FFICTEK    |
| Y08320     | -----KHTGPGILSMA-----       | NAG---- | PGTNGSQ-FFICTEK    |
| E1226445   | -----RHTGPGILSMA-----       | NAG---- | AGTNGSQ-FFICTEK    |
| L32095     | -----KHVGPVLSMA-----        | NAG---- | PNTNGSQ-FFICTVP    |
| CAA10766   | -----F-IAKHTGPGLLSM-----    | ANSG--- | PNTNGSQ-FFLTCAK    |
| AAF69796   | -----FKLRHDRPFLLSMA-----    | NAG---- | PNTNGSQ-FFITTVV    |
| AAF69795   | -----FKLRHDRPFLLSMA-----    | NAG---- | PNTNGSQ-FFITTVV    |
| CSNCM      | -----FAKKHVRPGLLSMA-----    | NAG---- | PNTNGSQ-FFVTTVP    |
| NF01287451 | K-----HLERGTVSMATVPHPS----- | -----   | DPDTRLAGSQFIVTLGDN |
| NF01527836 | -----RPVLRHNERGIVSMA-----   | NKG---- | PNTNGSQ-FFIL-FD    |
| NF01488902 | -----HPGLKHTGAGVLSMA-----   | NAG---- | PNTNGSQ-FFIT-LA    |
| NF00648058 | -----F-QLKHDRPFLLSM-----    | ANAG--- | PGTNGSQ-FFVTTVP    |
| NF01487278 | -----KHSKKGLLSMA-----       | NAG---- | KDTNGSQ-FFITTVI    |
| NF01486260 | -----SLKHDKPYTVSMA-----     | NAGP--- | NTNGSQ-FFIT-TE     |
| NF00904102 | -----KHSKKGLLSMA-----       | NAG---- | KDTNGSQ-FFITTVI    |
| NF01484914 | K-----HLERGTVSMATVPHPS----- | -----   | DPDTRLAGSQFIVTLGDN |
| NF01484255 | -----F-LLKHDTPGLLSM-----    | ANAG--- | PNTNGSQ-FFITTVP    |
| NF01483993 | K-----FNRRGLLGMANEGAP-----  | -----   | DTNSSQFFFTLGK-     |
| NF01533203 | -----KHTGPGILSMA-----       | NAG---- | PGTNGSQ-FFICTAK    |
| NF01483647 | -----EGPNTHSARGIVSMA-----   | NKG---- | KNTNSSQ-FFIT-YR    |
| 371849     | -----GQLKHDRPGLLSMA-----    | NAG---- | PNTNGSQ-FFVTTVV    |
| J17900     | -----RHTGPGILSMA-----       | NAG---- | RDTNGSQ-FFITTVT    |
| NF00873669 | -----FQLKHKNPGLLSMA-----    | NAG---- | PNTNGSQ-FFITTVV    |
| NF01527595 | -----FQLKHSKPGLLSMA-----    | NAG---- | PNTNGSQ-FFITTVV    |
| NF01539217 | -----FERKHTRPGLLSMA-----    | NAG---- | PNTNGSQ-FFVTTVV    |
| 01035365   | -----RHTKKGVLSMA-----       | NAG---- | KDTNGSQ-FFITTAI    |
| YP_116397  | -----LKNDKYTVAMA-----       | RTND--- | PHSATAQ-FFINVAD    |
| YP_119877  | YAEGDPMAMEAIAYKRGTLAMA      | N-AG--- | PGTNGSQ-FFLVYGD    |
| CAD25897   | -----FEIAHDSIGKLSMA-----    | NRG---- | PHTNGSQ-FFITFDK    |
| CAD26352   | -----FELKHTKEGILSMA-----    | NCG---- | AHTNGSQ-FFITLGK    |
| AAD17998   | -----RHTKTGLLSMA-----       | NAG---- | KDTNGSQ-FFITTAV    |
| 32959712   | -----RHTGPGVLSMA-----       | NAG---- | PNTNGSQ-FFLCTVE    |
| CSNCC      | -----FAKKHVRPGLLSMA-----    | NAG---- | PNTNGSQ-FFVTTVP    |
| AJ006689   | -----FSRKHKKGILSMA-----     | NAG---- | PNTNGSQ-FFITTAV    |



|           |                                 |       |                              |
|-----------|---------------------------------|-------|------------------------------|
| AAF28343  | -----TKELKHTGAGILSMA-----       | NSG   | -----VNSNGSQ-FFIT-FG         |
| AAD50375  | -----F-LVKHKIG-CLSM-----        | ANAG  | -----KNTNGSQ-FFITTAE         |
| AAK21908  | -----RHTGPGILSMA-----           | NAG   | -----PGTNGSQ-FFLCTVP         |
| AAAG13968 | -----FQIKHTRPGLLSMA-----        | NAG   | -----PNTNGSQ-FFITTVK         |
| 3AB58884  | -----FQIKHTRPGLLSMA-----        | NAG   | -----PNTNGSQ-FFITTVK         |
| E1363908  | -----FQLKHNPGLLSMA-----         | NAG   | -----PNTNGSQ-FFITTVV         |
| AAD16142  | -----FIYKHNPGLLSMA-----         | NAG   | -----PNTNGSQ-FFITTVV         |
| 31764137  | -----FQKKHVERGMLSMA-----        | NAG   | -----PNTNGSQ-FFITVTK         |
| Z32674    | -----FQLKHDRPGLLSMA-----        | NAG   | -----PNTNGSQ-FFVTTVV         |
| JT0686    | -----FKLEHSPGLLSMA-----         | NAG   | -----PNTNGSQ-FFVTTVV         |
| C5CK      | -----FVKRHRPGLLSMA-----         | NAG   | -----PNTNGSQ-FFITTVP         |
| NP_986490 | -----FVKKHEKPGLLSMA-----        | NAG   | -----PNTNGSQ-FFITTVP         |
| NP_985014 | -----FTKKHTRAGLLSMA-----        | NAG   | -----RNTNGSQ-FFITTVP         |
| NP_984799 | -----FSEPFLSMA-----             | NMGA  | -----PDSNSSQ-FFITTTA         |
| NP_984183 | -----F-ARKHDRPFLLSM-----        | ANAG  | -----PNTNGSQ-CFITCAP         |
| NP_982586 | -----KHDRPGRLAMVNDG-----        |       | -----PDSNHSQ-FYIVTSL         |
| NP_982486 | -----KHDKPGRLSMA-----           | NRG   | -----RDTNGSQ-FFITTVV         |
| AAAT09096 | -----RHTSPYQLSMA-----           | NAG   | -----PNTNGSQ-FFITTVK         |
| YP_014938 | -----AFNLRGALSMA-----           | NAGP  | -----NTNGSQ-FFIVQKP          |
| NP_951950 | -----LSNKRGTIAMA-----           | RTAV  | -----VDSATSQ-FFINLVD         |
| NP_935388 | -----LKNVTGSIAMA-----           | RTQD  | -----PNSATRQ-FFINLVD         |
| NP_907765 | -----GYAFDREGLLAMA-----         | NSGP  | -----NSNGSQ-FFIT-TA          |
| 3AC91249  | -----YGPPGVFSMAR-----           | YEKD  | -----PNSASSQ-FFISFSD         |
| 3AC90551  | -----TTPPVLTHSKGALAWARD-----    |       | -----NNPNSASSQFYIALSDN       |
| 3AC89441  | I---PEKIFPVMRHLPGAVGLAHTEK----- | DPNSG | -----STQFYITYAN              |
| 3AC88914  | RN--PRTQPPVLVHSRGALAMARS-----   |       | -----QNPNSASSQFYITLAET       |
| AAV50868  | -----KGLLSLVPYTD-----           | ESG   | -----NRYDSTFMITLDD           |
| AAV82698  | -----LKNEYGTIAMA-----           | RERE  | -----PHSGTRQ-FFFNLND         |
| AAV81872  | -----KPNVVGSVAMA-----           | RTPD  | -----PHSASSQ-FFINVND         |
| NP_736022 | -----LYNIRGSLAMA-----           | NAGA  | -----DTNGSQ-FFINQSQ          |
| NP_734780 | -----LYNVRGALSMA-----           | NAGP  | -----NTNGSQ-FFIVQNT          |
| YP_085398 | -----PHRHLVGSLSMA-----          | HAG   | -----RNTGGSQ-FFIVHEP         |
| NP_643098 | -----RDTTGTGKTWLAHCYG-----      |       | -----TLGAGRNNDEDSSIGAEYVVTGQ |
| NP_641352 | VGH-----ERGVLSMA-----           | NAG   | -----PNTNGSQ-FFITHTA         |
| 3AB76758  | R---YLDMPVLPFSSFGALAMARP-E----- |       | -----TEVDGASSQVFFFLFEP       |
| YP_129479 | -----LKNVVGSLAMA-----           | RTDA  | -----PHSATGQ-FFINLDD         |
| YP_129310 | -----LSNKVGTIAMA-----           | RTME  | -----PHSASSQ-FFINVND         |
| YP_129032 | -----LENNRATVAMA-----           | RTQN  | -----PNSATRQ-FYINYQN         |
| YP_101389 | -----KYFHKKGALSAAARQ-----       |       | -----GDEVNPKKESGCFYIVTGKV    |
| YP_087816 | -----LKNLRGTIAMA-----           | RTSA  | -----PHSATAQ-FFINLQD         |
| YP_087815 | -----LSNKRGTIAMA-----           | RTSD  | -----PHSATAQ-FFINVAD         |
| YP_076496 | -----VTRP-----YQRGTIAMA-----    | RTTA  | -----PNSAGSQ-FFICTGL         |
| AAAT91289 | -----LALKHSPGLLSMA-----         | NAG   | -----KNTNGSQ-FFITTVV         |
| AAAT91260 | -----LALKHSPXGLLSMA-----        | NAG   | -----KNTNGSQ-FFITTVV         |
| NP_868477 | -----QHTTPGLLSMA-----           | NSG   | -----RNTNGSQ-FFITVAP         |
| NP_867717 | KHD-----GPGVLSMA-----           | NAG   | -----PNTNGSQ-FFITHEA         |
| NP_867158 | QHN-----RTGVLSFA-----           | KSSD  | -----DTNDSQ-FFITEVE          |
| NP_865515 | -----HHALRGSVVMAK-----          |       | -----IPMGEGRFIENSASSQFAIFFLP |
| NP_992233 | -----LKNTRGTIAMA-----           | RTND  | -----PHSATAQ-FFINVAD         |
| NP_991569 | -----LRNLRTIAMA-----            | RTAD  | -----KDSATSQ-FFLNVD          |
| NP_280624 | THD-----GPGVLSMA-----           | NSG   | -----PDTNGSQ-FFITLDA         |
| 3AC18575  | AAQEDLNTP--VIYERGTIAMA-----     | N-AG  | -----QDTNGSQ-FFLNVED         |

|             |                                                   |
|-------------|---------------------------------------------------|
| 3AC16839    | RFD-----RAYLLAMA-----NAG----PGTNGSQ-FFITTP        |
| 3AB82272    | FPN-----NLKHSRGTISMA-----RAMN---FDSAGSQ-FFIMHEN   |
| 3AB99042    | AT--DLTTP--VIYERGTIAMA-----N-AG---ADTNGSQ-FFLNYED |
| 3AB97427    | RFD-----RAYLLAMA-----NAG----PGTNGSQ-FFITVTP       |
| 3AC08372    | R---YLEHPVLPFSAYGTVALARP-N-----DDPNGSSQFFLLFEP    |
| 3AC07690    | -----KVSPVLNHRRGAVAMARS-Q-----LPDSA--SAQFYIALD-   |
| YP_072215   | -----LRNLRGTISMA-----RTAD---KDSATSQ-FFLNVD        |
| YP_069574   | -----LKNTRGTLAMA-----RTND---PHSATAQ-FFINVD        |
| NP_778719   | MCH-----ERGSLSMA-----NAG----PNTNGSQ-FFITHVA       |
| NP_245881   | -----LSNKRGTIAMA-----RTSD---PHSATAQ-FFINVD        |
| NP_245880   | -----LKNLRGTVAMA-----RTSD---PHSATAQ-FFINTVD       |
| NP_354667   | -----FTRGVVGMARS-----SDPNSANSQFFIMFADG            |
| NP_354666   | -----HVRGTCSMARS-----QSPNSANSQFFICFTDS            |
| NP_298502   | VSH-----ERGSLSMA-----NAG----PNTNGSQ-FFITHVA       |
| AAAN39296   | -----KHTGPGILSMA-----NAG----PNTNGSQ-FFLCTAT       |
| AAQ24380    | -----KHTGKGILSMA-----NAG----PNTNGSQ-FFLCTAK       |
| ZP_00353225 | RFD-----KKYLLAMA-----NAGKIAGHGTSQ-FFITVAT         |
| ZP_00244808 | -----LKNDKYTLAMA-----RTNA---PHSASSQ-FFINATD       |
| ZP_00244807 | -----LRNERGSIAMA-----RTMD---PNSATAQ-FFVNLTN       |
| ZP_00358245 | LTH-----EAGVISMA-----NAG----PNTNGSQ-FFITHTP       |
| ZP_00350273 | -----LQNKTYTIAMA-----RTPA---PDSASSQ-FFINVD        |
| ZP_00129494 | -----LKNVRGTIAMA-----RTAA---PHSATSQ-FFINLVD       |
| ZP_00130259 | -----LKNEEYTVAMA-----RTQD---PHSATAQ-FFINVKD       |
| ZP_00136576 | -----LLNERGTLAMA-----RTGV---VDSATSQ-FFINLTD       |
| NF01760157  | -----NRNDRGTISMA-----NAG----PNTGGSQ-FFINLVN       |

|           |                                         |
|-----------|-----------------------------------------|
| CSHUA     | TE-----WLDG-----KHVVFGKVKEG-----MN      |
| NP_839944 | TE-----WLDG-----KHVAFGKVKER-----VN      |
| NP_115861 | KQP-----HLDM-----KYTVFGKV-----ID--G--L  |
| NP_570981 | KQP-----HLDM-----KYTVFGKV-----ID--G--L  |
| NP_057143 | PTQ-----WLDG-----KHTIFGRV-----CQ--G--I  |
| CSHUB     | TA-----WLDG-----KHVVFGKVLEG-----ME      |
| 366681    | TD-----WLDG-----KHVVFGVTEG-----LD       |
| A57545    | AE-----HLDF-----KHVVFGFVKDG-----MD      |
| A41581    | TD-----WLDG-----KHVVFGHVKEG-----MD      |
| A54204    | PT-----WLDG-----KHVVFGKVIDG-----MT      |
| 364705    | SCA-----YLDK-----KHTIFGRV-----VG--G--FD |
| 338552    | PTP-----WLDN-----KHTVFGRV-----TK--G--M  |
| NP_624311 | -----LDYLDGV-----HTVFGEVTEG-----M       |
| 32708309  | CD-----WLDG-----KHVVFGKII--D-----GL     |
| A45981    | TP-----HLDG-----KHVVFGQVIK-----GI       |
| J40763    | TPH-----LDG-----HHVVFGQVIS-----GQ       |
| A47328    | APH-----LDG-----VHVFGGLVIS-----GF       |
| KP_531396 | TE-----WLDG-----KHVVFGKVKEG-----MN      |
| KP_525294 | TE-----WLDG-----KHVVCGKAKEG-----KN      |
| KP_523512 | T-----VVGQ-----KHVVSGKVKEG-----MN       |
| KP_507866 | TD-----CVGI-----IPRARPPSLDP-----LP      |
| KP_517783 | TE-----WLDG-----KHVLFGKVKEG-----RN      |
| KP_517773 | TE-----CLDG-----KHVAFGKVKER-----MN      |
| KP_526904 | TG-----WLDG-----THVVFGKAKEG-----IN      |
| KP_516556 | -----CALPRLS-----                       |

|            |                                             |
|------------|---------------------------------------------|
| KP_526001  | -----VKED-----MD                            |
| KP_516021  | KQP-----HLDM-----KYTVFGKV-----ID--G--L      |
| KP_515886  | TPH-----LDG-----HHVVFQOVIS-----GQ           |
| KP_525218  | TE-----WLDG-----KHVAFGKVKEH-----VN          |
| KP_507684  | TE-----WLDG-----KHVVFGKVKEG-----MN          |
| KP_524688  | CD-----WLDG-----KHVVFGKII--D-----GL         |
| KP_513346  | TD-----WLDG-----KHVVFGEVTEG-----LD          |
| KP_524598  | TE-----SLDG-----QHVVFGNMKEG-----MN          |
| KP_515004  | EVS-----LLAS-----TMMILSFFWSSWDLWMWPLQ--G--Q |
| KP_523437  | TE-----WLNA-----STWSPARXKKA-----XR          |
| KP_520485  | -----G-----HGALWSRS-----                    |
| KP_519076  | TE-----WLDG-----KHVVFGKVKEG-----MN          |
| KP_527705  | GV-----VGWQ-----ACSLWQGERRH-----EY          |
| KP_527529  | -----                                       |
| KP_518678  | -----LDYLDGV-----HT-----                    |
| CSMSA      | TE-----WLDG-----KHVVFGKVKEG-----MN          |
| NP_598845  | TD-----WLDG-----KHVVFGHVKEG-----MD          |
| AAH58369   | PTQ-----WLDG-----KHTIFGRV-----CQ--G--I      |
| A56861     | TS-----WLDG-----KHVVFGKVLEG-----MD          |
| A40047     | PT-----WLDG-----KHVVFGKVLDG-----MT          |
| NKCR_MOUSE | APH-----LDG-----VHVVFGLVIS-----GF           |
| AAH61645   | KQP-----HLDM-----KYTVFGKV-----ID--G--L      |
| 3AC41068   | SCA-----YLDK-----KHTIFGRV-----VG--G--FD     |
| 3AC34686   | TP-----HLDG-----KHVVFGQVIK-----GL           |
| 3AB30711   | -----LDYLDGV-----HTVFGEVTEG-----M           |
| 3AB25645   | CD-----WLDG-----KHVVFGKII--D-----GL         |
| 3AB23880   | CD-----WLDG-----KHVVFGKII--D-----GL         |
| NF00527760 | AE-----HLDF-----KHVVFGFVKDG-----MD          |
| NF01138503 | PTP-----WLDN-----KHTVFGRV-----SK--G--M      |
| NF00510830 | TD-----WLDG-----KHVVFGEVTEG-----LD          |
| NF00510932 | PTQ-----WLDG-----KHTIFGRV-----CQ--G--I      |
| NF01595779 | TE-----WLDG-----KHVVFGKGKEV-----MN          |
| NF02014914 | TE-----WLDG-----KHVVFEKVKEG-----MN          |
| NF01930249 | TE-----WLYG-----KHVVFGKMKEG-----MN          |
| NF01929278 | TE-----WLDG-----KHVVFGKVKEG-----MN          |
| NF00523006 | TE-----WLDG-----KHVVFGKVKEG-----MN          |
| NF00508381 | TE-----WLDG-----KHVVFGKVKEG-----MN          |
| NF01215170 | KQP-----HLDM-----KYTVFGKV-----ID--G--L      |
| CSRTA      | TE-----WLDG-----KHVVFGKVKEG-----MS          |
| NP_783638  | KQP-----HLDM-----KYTVFGKV-----ID--G--L      |
| NF01612782 | TP-----HLDG-----KHVVFGQVIK-----GL           |
| NF01612825 | TD-----WLDG-----KHVVFGIITDG-----LD          |
| NF01607941 | TP-----HVDG-----KRVVFGQVMK-----GL           |
| NF01607846 | TE-----WLG-----KHVVFGKVKD-----TN            |
| NF01609144 | PA-----WLDG-----KHVVFGKVLDG-----MT          |
| NF01608897 | TS-----KKIT-----ISDCGQLLVSL-----IC          |
| NP_758443  | TD-----WLDG-----KHVVFGHVKEG-----MD          |
| AAH61971   | TS-----WLDG-----KHVVFGKVLEG-----MD          |
| 32828710   | TPH-----LDG-----HHVVFQOVIS-----GQ           |
| 338388     | TA-----WLDN-----KHVVFGEVVEG-----LD          |
| AF132148   | -----LTSLDGN-----HCVIGEVVEG-----H           |
| NP_611113  | SCK-----HLDG-----KHTIFGKL-----VG--G--LD     |

|              |                                         |
|--------------|-----------------------------------------|
| NP_611695    | TS-----WLDG-----RHHVFGKILSG-----MN      |
| NP_610590    | AQP-----NLDL-----KYTLFGRV-----ID--G--F  |
| NP_648697    | TT-----WLDN-----KHVVFGKVVEG-----MD      |
| NP_648508    | -----TPELQNK-----NTLFGKIT-G-----D       |
| NP_648338    | C-----ENLNG-----TNVVVGRVLRG-----L       |
| NP_476656    | AK-----WLDG-----KHTVFGKVLEG-----M       |
| NP_523874    | PTQ-----WLDG-----KHTIFGRV-----YT--G--M  |
| NP_523773    | TD-----WLDN-----KHVVFGHVISG-----AE      |
| NP_610224    | CN-----FLDG-----KHVVFGRVL--D-----GL     |
| NP_733246    | APH-----LDN-----IHVVFGQVIS-----GQ       |
| NP_611935    | PTP-----WLDN-----KHTVFGRV-----YR--G--M  |
| EAA03569     | C-----PHLNG-----TNVVVGVYVIRG-----G      |
| EAA03948     | TS-----WLDG-----RHHVFGKVLEG-----MN      |
| EAA04625     | CN-----FLDY-----KHVVFGRVL--D-----GL     |
| EAA06299     | TS-----WLND-----RHHVFGSVVEG-----MD      |
| EAA08127     | APH-----LDN-----VHVVFGHVVS-----GQ       |
| EAA09839     | SCK-----HLDG-----KHTIFGKL-----VG--G--LE |
| EAA10133     | PTP-----WLDN-----KHTVFGRV-----HK--G--M  |
| EAL39647     | -----LTSLDGR-----HTVIGEVTG-----H        |
| EAA13913     | AQP-----ALDL-----KYTLFGQV-----ID--G--F  |
| EAA13914     | AP-----WLDG-----KHTIFGKVLDG-----Q       |
| EAA14200     | TD-----WLDG-----KHVVFGNVISG-----AD      |
| EAA01474     | IILR-----EMRG-----FTGIFAFVVEG-----L     |
| KP_321072    | IILR-----EMRG-----FTGIFAFVVEG-----L     |
| KP_320182    | PTQ-----WLDG-----KHTIFGRI-----HT--G--M  |
| KP_319131    | AP-----WLDG-----KHTIFGKVLDG-----Q       |
| KP_311949    | LP-----CQ                               |
| CAI11739     | AT-----WMDH-----KYVAFGQLVG-----T        |
| AAQ91263     | TN-----WLDG-----KHVVFGKVVDG-----LN      |
| NP_001004626 | TE-----WLDG-----KHVVFGQVKEG-----ME      |
| NP_001002065 | TP-----HLDG-----KHVVFGQVLK-----GM       |
| NP_957499    | CD-----WLDG-----KHVVFGKVV--D-----GL     |
| AAQ94596     | CD-----WLDG-----KHVVFGKVV--D-----GL     |
| NP_998184    | TP-----WLDG-----KHVVFGKILEG-----MD      |
| NP_001002146 | KQP-----HLDM-----KYTVFGKI-----ID--G--L  |
| AAQ91264     | TS-----WLDG-----KHVVFGQVVEG-----LD      |
| AAH59458     | TS-----WLDG-----KHVVFGQVVEG-----LD      |
| AAH56814     | -----VDYLDGV-----HTVFGEVTG-----M        |
| AAH62863     | TS-----WLDG-----KHVVFGQVVEG-----LD      |
| NP_998629    | TPH-----LDG-----IHVVFGQVIT-----GQ       |
| NP_957285    | SCA-----YLDR-----KHSVFGRV-----VG--G--LE |
| NP_506749    | TA-----WLDG-----KHVVFGRVVEG-----LD      |
| NP_506561    | TP-----WLDG-----GHVVFGQVTDG-----MS      |
| NP_504522    | GPS-----VVDG-----CPIGDVIEG-----I        |
| NP_506751    | TE-----WLDG-----KHVVFGRVVEG-----LD      |
| NP_497745    | APH-----CNG-----KHVVFGEVVK-----GQ       |
| NP_499828    | TT-----WLDG-----KHVVFGKVIEG-----MD      |
| NP_497257    | TS-----WLDG-----KHVVFGKILEG-----MD      |
| NP_509506    | VPH-----LDG-----KHCVFGEVIK-----GV       |
| NP_503034    | TD-----WLDG-----KHVVFGHVVEG-----MN      |
| NP_501118    | PTQ-----HLDG-----KHTIFGRV-----AA--G--M  |
| NP_496562    | G-----APELDKK-----HTIFGKVT-G-----P      |

|           |                                            |
|-----------|--------------------------------------------|
| NP_495855 | TD-----FLDN-----KHVVFGRVL--D-----GM        |
| NP_496337 | PCK-----YLDR-----KHTIFGRL-----VG--G--QD    |
| NP_495417 | KQA-----HLDM-----KYTLFGKV-----ID--G--F     |
| NP_493378 | PAD-----WLDG-----KNTLFGEV-----TA--G--M     |
| NP_492343 | -----LDYLDDQ-----HTIFGQVTEG-----L          |
| NP_493624 | TP-----WLDG-----RHVVFGKILEG-----MD         |
| P06073    | TD-----WLDG-----KHVVFGQVVEG-----LD         |
| NP_175776 | -----LDYLDGK-----HTVFGQIAEG-----F          |
| NP_567029 | TS-----WLDG-----HHVVFGKVLG-----ME          |
| NP_201554 | SAT-----HLNY-----KHTVFGGV-----VG--G--LA    |
| NP_200679 | TS-----WLDG-----RHVVFGKVVVG-----MD         |
| NP_181407 | CD-----WLDN-----KHVVVFGRVLG-D-----GL       |
| NP_191166 | TS-----WLDG-----KHVVFGKVVVDG-----YN        |
| NP_171696 | KQP-----HLNG-----LYTIFGKV-----IH--G--F     |
| NP_195222 | AS-----WLEG-----EHVVLGKVIQG-----MD         |
| NP_195213 | TS-----WLDG-----KHVVFGQVVKG-----LD         |
| NP_196816 | TS-----WLDG-----RHVVFGQVIEG-----ME         |
| NP_188932 | YG-----LQVDG-----DHVVIGKVVVEG-----L        |
| NP_191762 | TS-----WLDN-----KHVVFGQVIEG-----MK         |
| NP_190046 | ATP-----WLDN-----KHTVFGRV-----VK--G--M     |
| NP_180557 | TS-----WLDG-----RHVVFGKVVQ-----MD          |
| NP_181157 | PQP-----SLDG-----KHTIFGRV-----CR--G--M     |
| NP_179251 | TS-----WLDG-----KHVVFGQVVEG-----LN         |
| NP_179709 | TD-----WLDG-----KHVVFGQVVEG-----LD         |
| AAK02067  | TS-----HLDG-----KHVVVFGRVTKG-----M         |
| P82869    | RNSGLGGLSFDEGQ-----FSVFGYTIAG-----K        |
| P05352    | Y-----ESLDSLL-----NNVVFGKLIQG-----K        |
| P49181    | Q-----PHLDG-----KHVVFGKVVVEG-----M         |
| P05314    | -----CDWLDKK-----HTIFGKVT--G-----D         |
| CSZPA     | TP-----WLDG-----KHVVFGEVTEGM-----D-        |
| E313994   | PTP-----WLDG-----KHTIFGRV-----VS--G--L     |
| E1335804  | TP-----WLDG-----HHVVFGEVLSG-----YD         |
| E1331567  | CD-----FLDG-----KHVVFGGEVI--E-----GY       |
| 362327    | TP-----HLDG-----KHVVFGKVIQ-----GK          |
| 362590    | PAK-----HLDN-----KHTIFGRV-----VG--G--LN    |
| E1294518  | LTP-----WLDG-----KHTIFARA-----YA--G--L     |
| P39728    | -----LEGLDER-----YPIYGQVAEG-----F          |
| E1263915  | -----TPEWNGK-----QTLFGRVV--G-----D         |
| CSBY      | CP-----WLDG-----KHVVFGEVVDGY-----D-        |
| 330507    | CP-----WLDG-----KHVVFGEVTKGM-----D-        |
| 312324    | EAS-----WLDG-----KHVVFGQVVDG-----MD        |
| 357050    | AP-----HLNG-----KHSIFGQVVHG-----K          |
| 348567    | TP-----HLDG-----KHVVFGGEVIQ-----GK         |
| CSBYC3    | DGN-----EELDG-----KSVVFGQITSG-----LD       |
| 363359    | T-----PLEG-----ESVVFGQVTAG-----LK          |
| 338324    | CP-----WLDG-----KHVVFGEVLDG-----MD         |
| PcCyP19   | TQ-----WLDG-----KHVVFGQVLEG-----IE         |
| PcCyP20   | PCP-----SLDT-----KHTAFGCVDL-----AWND--GESE |
| PcCyP21.1 | TP-----WLDG-----RHVVFGKVVVEG-----MD        |
| PcCyP21.3 | TE-----WLDG-----KHVVFGQITKG-----YE         |
| PcCyP24.3 | CP-----WLDG-----KHVVFGQVLRG-----F          |
| PcCyP26   | N-----EHLDG-----KYVVCQVLEG-----W           |

|            |                                        |
|------------|----------------------------------------|
| FcCyP28    | TP-----WLDG-----KHVVFGRVTEG-----ID     |
| FcCyP30    | EAP-----HLNG-----TCICFGRVVKG-----F     |
| FcCyP35.1  | MS-----WMNG-----RYVAFGRVIDG-----M      |
| FcCyP35.3  | SEE-----KALNG-----RHVCFGRVVRG-----LD   |
| FcCyP40    | AQ-----HLTG-----RHVVFGRVVRG-----M      |
| FcCyP110   | VAP-----WLNK-----HTVFGFVVS-----GK      |
| AAT44353   | TS-----WLDG-----KHVVFGRVTDG-----MN     |
| EAL37431   | CP-----WLDG-----KHVVFGRVLEG-----ME     |
| EAL37232   | SLP-----QLNG-----EYVIFGRL-----ID--G--F |
| EAL37110   | TP-----HLDG-----RHVVFGRVLD-----D       |
| EAL36265   | -----LSHLDGN-----HVIFAQVEEG-----I      |
| EAL35294   | CS-----WLDN-----KHVVFGRVLDG-----SF     |
| J68268     | TA-----WLDG-----KHVVFGRVLDG-----MN     |
| J68269     | TQ-----WLDG-----KHVVFGRVLEG-----MN     |
| AAQ15626   | TP-----WLDG-----KHVVFGRVTKG-----YE     |
| AAB07896   | TQ-----WLDG-----KHVVFGRVLEG-----MD     |
| AAK14937   | TQ-----WLDG-----KHVVFGRVVEG-----KD     |
| CAC18541   | CD-----FLDG-----KHVVFGRVV--D-----GM    |
| A45000     | TS-----WLDG-----KHVVFGRV--EVEG-----ED  |
| J9Y0F5     | SLP-----QLNG-----EYVIFGKL-----ID--G--F |
| J47811     | TE-----WLDG-----KHVVFGRVVEG-----MN     |
| J50388     | CD-----WLDG-----KHVVFGRVVDG-----QN     |
| L46884     | CS-----WLDG-----KHVVFGRVVSIG-----D--   |
| M93420     | CD-----WLDG-----KHVVFGRVVDG-----QN     |
| J50389     | NP-----WLDG-----KHVVFGRVVEG-----MS     |
| G992633    | TS-----WLDG-----KHVVFGRVVEG-----MN     |
| F323073    | CD-----WLDG-----KHVVFGRVVDG-----QN     |
| 352758     | TP-----WLDG-----RHVVFGRVLDG-----MD     |
| F1203753   | TS-----WLDG-----KHVVFGRVLEG-----YE     |
| CAB58290   | QP-----QLDK-----THVVFGRVYSG-----I      |
| CAB58298   | TP-----WLDG-----KHVVFGRVIDG-----LD     |
| AAF69736   | AT-----HLTG-----RHVVFGRVVRG-----M      |
| AAD46565   | TP-----WLDG-----RHVVFGRVLDG-----MD     |
| A53522     | TE-----WLDG-----RHVVFGRVIT-----T       |
| NP_702112  | -----AEYLNNK-----NTLFGKVA--K-----H     |
| NP_701512  | MP-----ILHK-----HNVVIGTVLKG-----MN     |
| NP_701389  | CP-----WLDK-----RHVVLGHLEYG-----F      |
| NP_701030  | RQP-----HLNG-----IYPVFGKV-----ID--G--M |
| NF01067443 | TH-----TYNN-----KNIIIGQVIKN-----M      |
| NF01067965 | CE-----WLDG-----KNVVFGRVIDND-----SL    |
| NF01065889 | PCP-----WLDG-----KHTVFGKV-----TQ--G--S |
| NF00926916 | CP-----WLDG-----KHVVFGRVIEG-----MN     |
| 352760     | TP-----WLDG-----RHVVFGRVVEG-----L      |
| J10322     | CE-----WLDG-----KNVVFGRVIDND-----SL    |
| CAB39039   | CP-----WLDG-----KHVVFGRVIEG-----MN     |
| CAD51648   | PLP-----HLDG-----KHTIFARV-----SK--N--M |
| NF01497907 | CP-----WLDG-----KHVVFGRVIEG-----MN     |
| NF01497552 | PCP-----WLDG-----KHTVFGKV-----TQ--G--T |
| NF01497379 | TP-----WLDG-----RHVVFGRVIEG-----I      |
| NF01497199 | CE-----WLDG-----KNVVFGRVIDND-----SL    |
| NF01496968 | IK-----KYDN-----KNVIIGRVIKN-----M      |
| NF01495390 | MP-----ILHK-----HNVVIGTVLKG-----MD     |

|            |                                        |
|------------|----------------------------------------|
| NF01495324 | PLP-----HLDG-----KHTIFARV-----SK--N--M |
| NF01493974 | CP-----WLDK-----KHVVFGNLEYG-----F      |
| NF01493918 | -----SECL-----                         |
| E316521    | CP-----WLDG-----KHVVFGEVVDGF-----D-    |
| CAC35733   | -----APQLDGK-----HTIFGQVQEG-----F      |
| J47812     | TD-----WLDG-----KHVVFGRVVDG-----MD     |
| J47813     | TE-----WLDG-----KHVVFGRVVEG-----MN     |
| E2624966   | CP-----WLDG-----KHVVFGQVVE-----GY      |
| E1317902   | SCS-----YLDG-----KHSIFGRV-----VG--G-TG |
| E1319851   | SCS-----YLDG-----KHTIFGRV-----VG--G-TE |
| E3057040   | SCS-----YLDG-----KHTIFGHV-----VG--G-TG |
| AAB81959   | TE-----WLDG-----KHVVFGKVKEG-----MN     |
| AF023860   | TE-----WLDG-----KHVVFGKVKEG-----MN     |
| AAB81961   | TE-----WLDG-----KHVVFGKVKEG-----MN     |
| AAF22215   | TE-----WLDG-----KHVVFGRVKEG-----MS     |
| AF243140_1 | TE-----WLDG-----KHVVFGKVKEG-----MN     |
| AF252388   | TD-----WLDG-----KHVVFGHVKEG-----MD     |
| CSBOAB     | TE-----WLDG-----KHVVFGKVKEG-----MN     |
| NF01922219 | TD-----WLDG-----AHVVFGRVVDHC-----LE    |
| NF01725587 | TE-----WLDG-----KHVVFGSVVEG-----MD     |
| NF01897292 | EAR-----FLDD-----EHVVFAKETVQ-----S     |
| CSHYAC     | TE-----WLDG-----KHVVFGKVKEG-----MN     |
| NF00071027 | TE-----WLDG-----KHVVFGKVKEG-----MN     |
| NF01951405 | SCA-----YLDK-----KHTVFGRV-----VG--G-FE |
| NF01059378 | TE-----WLDG-----KHVVFGKVKEG-----MN     |
| NF01105745 | TS-----WLDG-----KHVVFGRVVDG-----MD     |
| NF00495096 | TE-----WLDG-----KHVVFGKVKEG-----MN     |
| NF01053198 | TE-----WLDG-----KHVVFGQVVEG-----LD     |
| CSPGA      | TE-----WLDG-----KHVVFGKVKEG-----MN     |
| NF01950932 | KQP-----HLDM-----KYTVFGKV-----ID--G--L |
| NF01951326 | TS-----HLDG-----KHVVFGQVIK-----GM      |
| NF00909389 | TE-----WLDG-----KHVVFGQVIEG-----LN     |
| NF01286555 | TE-----WLDG-----KHVVFGRVVEG-----MN     |
| NF01737225 | TS-----WLDG-----KHVVFGQVIEG-----MD     |
| NF01590839 | TP-----WLDG-----KHTIFGRVVEG-----Q      |
| AAH51602   | PTP-----WLDG-----KHSIFGRV-----SH--G--L |
| AAT69672   | TS-----WLDG-----KHVVFGQVIEG-----MD     |
| AAH54186   | TS-----WLDG-----KHVVFGQVIEG-----MD     |
| AAH54168   | TP-----WLDG-----KHVVFGKVLEG-----TE     |
| NF01208049 | SCT-----YLDK-----KHTVFGRV-----VG--G-FD |
| NF01844632 | TPH-----LDG-----LHVVFQVIS-----GQ       |
| NF01844615 | -----ADELNNK-----HTIFGKVT-G-----D      |
| NF01915773 | PTQ-----WLDG-----KHSIFGRV-----SH--G--L |
| NF01915657 | KQP-----HLDM-----KYTVFGKV-----ID--G--L |
| NF01557564 | TA-----HLDG-----KHVVFGQVLK-----GY      |
| AAH41536   | TS-----WLDG-----KHVVFGRVVEG-----MD     |
| AAH85963   | TPH-----LDG-----HHVVFGQVIS-----GQ      |
| AAH64250   | CD-----WLDG-----KHVVFGKVI--D-----GL    |
| AAH61335   | TA-----HLDG-----KHVVFGQVLK-----GY      |
| AAH59741   | TS-----WLDG-----KHVVFGTVIDG-----MD     |
| AAH67931   | TPH-----LDG-----LHVVFQVIS-----GQ       |
| AAH44993   | SCT-----YLDK-----KHTVFGRV-----VG--G-FD |

|            |                     |                    |          |
|------------|---------------------|--------------------|----------|
| A40516     | TA-----WLDG-----    | KHVVFgkvleg-----   | MD       |
| CYPB_BOVIN | TA-----WLDG-----    | KHVGFgkvleg-----   | MD       |
| AAR19276   | TE-----WLDG-----    | KHVVFgQVRGG-----   | MD       |
| A46579     | TP-----HLDG-----    | KHVVFgQVIK-----    | GM       |
| AAV40687   | TP-----HLDG-----    | KHVVFgEVIK-----    | GR       |
| NF01637248 | TS-----WLDG-----    | AHVVFgEVVEGF-----  | D-       |
| CYPR_BOVIN | AE-----RLDF-----    | KHVVFgFVKDG-----   | MD       |
| CYPR_CALVI | AQ-----WLNG-----    | KHTVfGKVIEG-----   | M        |
| E1317906   | PCK-----YLDR-----   | KHTIFgRL-----      | VG--G-QD |
| AAB87888   | TA-----WLDN-----    | KHVVFgEVVEG-----   | LD       |
| AAB87889   | TA-----WLDN-----    | KHVVFgEVVEG-----   | LD       |
| Q9XZZ5     | TS-----WLDG-----    | KHVVFgRVVEG-----   | LD       |
| 363995     | TS-----WLDN-----    | RHVVFgSVVEG-----   | MD       |
| 31703696   | TS-----WLDG-----    | KHVVFgAVTQG-----   | LD       |
| J36797     | TE-----WLDG-----    | KHVVFgRVVEG-----   | LD       |
| AF017738   | -----TPDLKK-----    | HTLFGKIV-G-----    | N        |
| L37292     | APH-----LNN-----    | IHVVFgKVVS-----    | GQ       |
| AAS01736   | TE-----WLDG-----    | KHVVFgQVVEG-----   | MD       |
| AAO61985   | SS-----FTS-----     | SPLIGLKSFS-----    | L        |
| CAC80550   | TE-----WLDG-----    | KHVVFgRVVEG-----   | MD       |
| AAO63777   | TE-----WLDG-----    | KHVVFgRVVEG-----   | MN       |
| 353522     | CP-----WLDG-----    | KHVVFgKVVAG-----   | QE       |
| E280557    | TP-----WLDG-----    | LHNIFgIVLEG-----   | A        |
| J70827     | APH-----LNN-----    | IHVVFgKVVS-----    | GQ       |
| J70884     | APH-----LNN-----    | IHVVFgKVVS-----    | GQ       |
| J55771     | TN-----WLDG-----    | RHVVFgELLE-----    | G        |
| Q1024669   | TS-----WLDG-----    | KHVVFgKVVKG-----   | MS       |
| 227879     | TD-----WLDG-----    | KHVVFgFVTEG-----   | MD       |
| AAD48910   | TS-----WLDG-----    | RHTVfGKVIEG-----   | MD       |
| AAO51811   | AE-----WLDG-----    | KNVVFgKVI--D-----  | GL       |
| AAF76472   | KQP-----HLNG-----   | LYTIFgKV-----      | IH--G--F |
| AAP80861   | TS-----WLDG-----    | KHVVFgKVLsg-----   | MD       |
| AAP73848   | CE-----WLDN-----    | KHVVFgRVLG-D-----  | GM       |
| 3AB62329   | PCQ-----SLDG-----   | KHTIFgRV-----      | SK--G--M |
| AAAL75728  | AP-----WLDG-----    | RHVAfGRVVAG-----   | M        |
| 348017     | CS-----WLDG-----    | KHVVFgRVVEG-----   | MD       |
| 348018     | TT-----WLDG-----    | KHVVFgKVVDG-----   | YT       |
| 3AD53622   | TS-----WLDG-----    | KHVVFgKVLsg-----   | MD       |
| 3AD53621   | TS-----WLDG-----    | KHVVFgKVLsg-----   | MD       |
| 3AD53620   | LT-----RLDG-----    | KHVVFgKVLsg-----   | MD       |
| KP_507188  | GPCP----ELDG-----   | QNIvFGTVLEGMN----- | V--ITSI  |
| KP_483750  | ATP-----WLDN-----   | KHTVfGRV-----      | VK--G--M |
| KP_483749  | VPG---AIEWVYR-----  | QGDVKPKLAVSDR----- | NT       |
| KP_482125  | ELTPSN-ANILDGR----- | YAVFGYVTEN-----    | E        |
| KP_478742  | RNSGLGGISFDEGQ----- | FSVFGYTTDG-----    | R        |
| KP_478741  | RNSGLGGISFDEGQ----- | FSVFGYTTDG-----    | R        |
| NP_385690  | -----PWLNKQ-----    | YSVWGQVVEG-----    | M        |
| NP_385689  | -----DFLNGQ-----    | YTVVGKVVVEG-----   | M        |
| NP_349373  | SP---HLDG-----      | DYAAFGRVTE-----    | GI       |
| 3AD45990   | -----VDYLDDK-----   | HTVfGMVAEG-----    | F        |
| 3AD45991   | -----VDYLDDK-----   | HTVfGMVAEG-----    | F        |
| NP_908419  | -----KLEVD-----     | QEQVGVPNG-----     | T        |



|            |                                                |
|------------|------------------------------------------------|
| NP_919903  | ER-----QQDG-----MLRHPADGSQWRN-----ID           |
| 3AD35839   | TP-----HLDG-----KHVVFGRVIKG-----M              |
| AAU87301   | TS-----WLDG-----KHVVFGQVVEG-----LE             |
| CAG90469   | TS-----WLNN-----AHVVFGEVVDG-----FD             |
| CAG88330   | CP-----WLDG-----KHVVFGEVVDGF-----D-            |
| CAG88054   | -----TENLKSFS-----QVYFGKVVEG-----F             |
| CAG86818   | KAP-----WLDN-----KHTIFGEV-----TD--G--F         |
| NF01109982 | TG-----WLDG-----KHVVFGKVVEG-----LD             |
| NF00686348 | -----FSLDGE-----YTPIGRVVSG-----M               |
| NF00686217 | -----FSLDGE-----YTPIGRVVSG-----M               |
| NF02138644 | TS-----WLDG-----KHVVFGKVVDG-----YS             |
| NF00926921 | TA-----WLDG-----KHVVFGEVLEG-----YD             |
| NF00909931 | TE-----WLDG-----KHVVFGQVVEG-----LN             |
| NF00956595 | TD-----WLDG-----KHVVFGELMEG-----MD             |
| NF02035209 | TD-----WLDG-----KHVVFGQVVDG-----ME             |
| NF01329591 | NS-----FLNRSA-----MD-----AGYAVFGKVTK-----GM    |
| CAG86678   | EHQN-----ILGDSS-----KYTAIGMVIDG-----Y          |
| CAG86274   | ECS-----WLDG-----KHVVFGQIING-----F             |
| CAG85447   | -----TPEFNNN-----YVLF GKIM-G-----D             |
| CAG85287   | CP-----WLDG-----AHVVFGEVIEGM-----D-            |
| CAG84900   | TP-----HLNG-----KHVVFGEVIQ-----GK              |
| CAG84822   | QP-----HLTG-----KHTVFGRVIHG-----K              |
| CAG84723   | VP-----HLDG-----KHVVFGEVV--E-----GF            |
| CAG79895   | TS-----WLDG-----KHVVFGEVLEG-----QD             |
| CAG78939   | RAP-----HLDG-----KHTVFGRV-----VD--N-SF         |
| CAG82238   | TP-----HLDN-----KHVVFGKLLS-----GK              |
| CAG81980   | CP-----WLDG-----KHVVFGEVTKGM-----D-            |
| CAG81971   | TP-----WLDG-----AHVVFGEVTDGM-----D-            |
| CAG81844   | CP-----ELDG-----SHVVFGHVI--E-----GM            |
| CAG84141   | -----IPFSG-----TVIGKIT-G-----D                 |
| CAG84091   | SP-----HLDG-----KHVAFGKV VAG-----K             |
| CAG83821   | YP-----HLST-----SNTVFGRLLEPAALEYLKALGDIPVD     |
| CAG76968   | NA-----FLDHGQ-----RD-----FGYAVFGKVVK-----GM    |
| CAG62671   | SP-----HLTG-----KHSIFGRVIHG-----K              |
| CAG76052   | ND-----FLNFRS-----ERA-----DGWGYCVFAEVTE-----GM |
| CAG59915   | CP-----WLDG-----KHVVFGEVTKGM-----D-            |
| CAG58658   | CP-----WLDG-----KHVVFGEVSEGY-----D-            |
| 33777556   | TS-----WLDG-----KHVVFGKVVEG-----MN             |
| AAF65770   | TE-----WLDG-----KHVVFGKVVEG-----MD             |
| 3AA25755   | TD-----WLDG-----KHVVFGQVVDG-----LN             |
| 3STO       | TE-----WLNQ-----KHVVFGQVVEG-----MD             |
| 3SRP       | TS-----WLDG-----KHVVFGQVVEG-----MD             |
| 3SZM       | TP-----WLDG-----KHVVFGQVVEG-----MD             |
| CYPH_ALLCE | TA-----WLDG-----KHVVFGQVVEG-----MD             |
| AAG01536   | TE-----LLDR-----KAVVFGQVVEG-----FD             |
| AAB51386   | TE-----WLDG-----KHVVFGQVVEG-----LD             |
| 354833     | TE-----WLDG-----KHVVFGQVVEG-----LD             |
| X85185     | TE-----WLDG-----KHVVFGQVVEG-----MD             |
| Y08273     | TA-----WLDG-----KHVVFGQVVEG-----MD             |
| Y08320     | TS-----WLDG-----KHVVFGQVVEG-----MD             |
| 31226445   | TE-----WLDG-----KHVVFGKVIEG-----MN             |
| 332095     | TP-----WLDN-----RHVVFGHVIEG-----LD             |

|            |                                                      |
|------------|------------------------------------------------------|
| CAA10766   | CD-----WLDN-----KHVVFGRVLG-E-----GL                  |
| AAF69796   | TS-----WLDG-----KHVVFGVSSGQ-----D-                   |
| AAF69795   | TS-----WLDG-----KHVVFGVSSGQ-----D-                   |
| CSNCM      | TS-----WLDG-----RHVVFGVADDE-----SM                   |
| NF01287451 | -----TDYLDGK-----AAIFGKVVEG-----F                    |
| NF01527836 | KAP-----HLDG-----LNTVFGKL-----IG--DESL               |
| NF01488902 | PTP-----WLDG-----KHTIFGRV-----KK--G--M               |
| NF00648058 | TP-----HLDG-----KHVVFGEVLS-----GK                    |
| NF01487278 | TS-----WLDG-----KHVVFGEVLEG-----YD                   |
| NF01486260 | KTP-----WLDN-----KHTIFGRG-----VQ--G--L               |
| NF00904102 | TS-----WLDG-----KHVVFGEVLEG-----YD                   |
| NF01484914 | -----TDYLDGK-----AAIFGKVVEG-----F                    |
| NF01484255 | TP-----FLDG-----KHVVFGKVV--D-----GM                  |
| NF01483993 | -----ADELTGK-----NTMFGRVA-G-----D                    |
| NF01533203 | TE-----WLDG-----KHVVFGQVVYG-----MD                   |
| NF01483647 | PAS-----HLDR-----KHTIFAKV-----IE--G--QD              |
| 571849     | TS-----WLNG-----RHVVFGEVADQE-----SL                  |
| J17900     | TS-----WLDG-----RHVVFGKVIEG-----MD                   |
| NF00873669 | TS-----WLDG-----KHVVFGVIDGM-----N-                   |
| NF01527595 | AP-----WLDG-----KHVVFGEVIEGM-----D-                  |
| NF01539217 | TS-----WLDG-----KHVVFGVADDE-----SL                   |
| 01035365   | TA-----WLDG-----KHVVFGEVLEG-----YD                   |
| YP_116397  | NA-----FLNHTA-----PSP-----SGWGYAVFGQVVD-----GT       |
| YP_119877  | SQ----LPP-----QYTIFGTVDE-N-----SM                    |
| CAD25897   | QHH-----LDG-----KHVVFGNVSG-----                      |
| CAD26352   | TQ-----WLDE-----KHVVFGEVVEGM-----D-                  |
| AAD17998   | TP-----WLDG-----KHVVFGEVLEG-----YD                   |
| 32959712   | TA-----WLDG-----KHVVFGKVCKG-----MD                   |
| CSNCC      | TS-----WLDG-----RHVVFGVADDE-----SM                   |
| AJ006689   | TS-----WLDG-----KHVVFGVADDE-----SM                   |
| AAF28343   | PTP-----WLDG-----KHTIFGRV-----KS--G--M               |
| AAD50375   | TP-----HLNG-----GHTVFGVVE-----GF                     |
| AAK21908   | TP-----WLDG-----KHVVFGEVSKG-----ME                   |
| AAG13968   | TS-----WLDG-----KHVVFGEVVSGF-----ED                  |
| 3AB58884   | TS-----WLDG-----KHVVFGEVVSGF-----ED                  |
| E1363908   | TS-----WLDG-----KHVVFGVIDGM-----N-                   |
| AAD16142   | TS-----WLDG-----KHVVFGEVADAE-----SM                  |
| 31764137   | TP-----WLDG-----KHVVFGKVIEGY-----DQ                  |
| 332674     | TS-----WLNG-----HHVVFGEVADQE-----SL                  |
| JT0686     | TS-----WLDG-----RHVVFGVADDE-----SM                   |
| CSCK       | CP-----WLDG-----KHVVFGVTDGL-----D-                   |
| NP_986490  | CP-----WLNG-----KHVVFGVSEGM-----D-                   |
| NP_985014  | CP-----WLDG-----KHVVFGVTKGM-----D-                   |
| NP_984799  | AP-----HLNG-----KHSIFGQVIHG-----K                    |
| NP_984183  | TP-----HLDG-----KHVVFGEVIO-----GK                    |
| NP_982586  | EPL-----EENDG-----KNVVFGQVYDG-----LE                 |
| NP_982486  | TP-----WLDG-----RHVVFGQVLDG-----MD                   |
| AAT09096   | TS-----WLDG-----RHVVFGRVLEG-----TD                   |
| YP_014938  | DMPADMLGQOMEQAGFPVEIIEAYK-QGGTPWLDGRHTVFGHVIEG-----M |
| NP_951950  | NA-----FLDNRG-----KTP-----DLFGYAVFGQVVE-----GM       |
| NP_935388  | NE-----FLDYDL-----QPPGYAVFGQVTE-----GF               |
| NP_907765  | RTP-----WLNG-----KHTIFGEV-----SK--G--F               |

|             |                                                      |
|-------------|------------------------------------------------------|
| 3AC91249    | PELNPTGKNLSDG-----KYANFGYITQG-----I                  |
| 3AC90551    | PS-----IRALDGR-----YAVFGRVVS-----M                   |
| 3AC89441    | NEMVNPRGNFLDGR-----YTVFGYVVDG-----L                  |
| 3AC88914    | -----RQLDGE-----YAVFGKVLE-----Q                      |
| AAV50868    | IRPS-NVLDELDR-----DQVVIGQVYGG-----L                  |
| AAV82698    | NT-----SLNP-D-----NGD-----WGYAVFGRIVE-----GL         |
| AAV81872    | NA-----FLNFQN-----ETP-----NGYGYCVFAEVVE-----GM       |
| NP_736022   | ---QDHSKQLSDKKVPKVVIKAYS-EGGNPSLDGGYTTFGQVISG-----M  |
| NP_734780   | KIPYAKK-ELERGGWPTPIAELYAGQGTPHLDRRHSVFGQLVNQS-----SF |
| YP_085398   | QP---HLDG-----VHTVFGKATS-----GI                      |
| NP_643098   | SPR-----QLDR-----NITVVGRVVKG-----M                   |
| NP_641352   | TP-----WLDG-----KHTVFGKVTQG-----L                    |
| 3AB76758    | ELTPAG-RNLLDGR-----YSVFGYLIE-----R                   |
| YP_129479   | ND-----FLDYTA-----TSN-----AGWGYAVFGKVSA-----GM       |
| YP_129310   | NK-----FLDFKS-----ETP-----DGWGYCVFAEVVE-----GM       |
| YP_129032   | NS-----FLNAQG-----GRAGYAVFGEVVK-----GF               |
| YP_101389   | FNDS---TLLNME-----QOKNQNKVTEAFN-----ALAQ             |
| YP_087816   | ND-----FLNFTE-----ESQ-----QGWGYAVFGKVTE-----GM       |
| YP_087815   | NA-----FLDYRAKEMFGREVV-----QEWGYAVFGEVVE-----GM      |
| YP_076496   | SCGGLDQQP-----VYVIFGQLIEGD-----DV                    |
| AAT91289    | TS-----WLDG-----VHVVFGEVVEGF-----D-                  |
| AAT91260    | TS-----WLDG-----VHVXFGEVXEGF-----D-                  |
| NP_868477   | TP-----WLDG-----KHVVFGRVIEG-----MD                   |
| NP_867717   | QP-----HLDN-----RHSVFGKVIEG-----Q                    |
| NP_867158   | TD-----FLDFN-----HSVFGQLVE-----GE                    |
| NP_865515   | VTS-----ASS-----NOTVFGRVIEG-----M                    |
| NP_992233   | ND-----FLNFRS-----ERP-----DGWGYCVFAEVTD-----GL       |
| NP_991569   | NA-----FLDHGQ-----RD-----FGYAVFGKVVK-----GM          |
| NP_280624   | QP-----HLDG-----RHAVFGAVTDG-----M                    |
| 3AC18575    | SP----LPP-----VYTYFGQITE-E-----GL                    |
| 3AC16839    | TP-----HLNN-----AHTIFGEVTDPE-----SQ                  |
| 3AB82272    | SP---HLDG-----QYASFGKVIE-----GM                      |
| 3AB99042    | SP----LAP-----NYTYFGQITE-E-----GL                    |
| 3AB97427    | TP-----HLNN-----AHTIFGEVTDAE-----SQ                  |
| 3AC08372    | ELTPAG-LNLLDGR-----YAVFGYVVEG-----E                  |
| 3AC07690    | -----QLDFLDGN-----YAVFGYVTDG-----M                   |
| YP_072215   | NA-----FLDHGQ-----RD-----FGYAVFGKVVK-----GM          |
| YP_069574   | ND-----FLNFRS-----ERP-----DGWGYCVFAEVTD-----GL       |
| NP_778719   | TP-----WLDG-----KHTVFGKVLDG-----Q                    |
| NP_245881   | NT-----FLDHRSKELFGKKVV-----QEWGYAVFGEVVE-----GM      |
| NP_245880   | ND-----FLNFSA-----ETQ-----KGWGYAVFANVVA-----GM       |
| NP_354667   | -----PFLNGQ-----YTVVGKVVSG-----M                     |
| NP_354666   | -----PWLNKQ-----YTVWGQVIEG-----M                     |
| NP_298502   | TP-----WLDG-----KHTVFGKVVDG-----Q                    |
| AAAN39296   | TG-----WLDG-----KHVVFGKVVEG-----LD                   |
| AAQ24380    | TD-----WLDG-----KHVVFGSVVEG-----MD                   |
| ZP_00353225 | TS-----HLNG-----KHTIFGEVADDA-----SR                  |
| ZP_00244808 | ND-----FLNFKS-----ESP-----QGWGYAVFGKVVA-----GT       |
| ZP_00244807 | NA-----FLDPAN-----SR-----DNGYAVFGKVIE-----GM         |
| ZP_00358245 | QP-----HLNG-----RHTVFGRVVAG-----M                    |
| ZP_00350273 | ND-----FLNFTA-----PTS-----QGWGYAVFGKVTA-----GT       |
| ZP_00129494 | NP-----DLDHQD-----DSD-----AGFGYCVFGAVVE-----GM       |

ZP\_00130259 NA-----FLNHRG-----KSL-----SGWGYAVFGKVVK-----GK  
ZP\_00136576 ND-----FLNHGA-----RD-----FGYAVFGKVVR-----GM  
NF01760157 NN-----YLDKXH-----PVFGKVIN-----GM

CSHUA -IVEAMER-----FGSRNGKT-----SKK-----ITIADCG---QLE-----  
NP\_839944 -IVEAMEH-----FGYRNSKT-----SKK-----ITIADCG---QF-----  
NP\_115861 ETLDELEKLPVNEKT-----YRPLND-----VHIKDITIHANPFAQ--  
NP\_570981 ETLDELEKLPVNEKT-----YRPLND-----VHIKDITIHANPFAQ--  
NP\_057143 GMVNRVGMVETNSQ-----DRPVDD-----VKI IKAYPSG-----  
CSHUB -VVRKVEST-----KTDSRD---KPLKD-----VIIADCG---KIEVEKP  
366681 -VLRQIEAQ-----GSKDG---KPKQK-----VIIADCG---EYV-----  
A57545 -TVKKIES-----FGSPKGSV---CRR-----ITITECG---QI-----  
A41581 -VVKKIES-----FGSKSGRT-----SKK-----IVITDCG---QLS-----  
A54204 -VVHSIELQ-----ATDGHD---RPLTN-----CSI INSG---KIDVKTP  
364705 -VLTAMENVESDPKT-----DRPKEE-----IRIDATTVFVDPYEEAD  
D38552 EVVQRISNVKVNPKT-----DKPYED-----VSI INITVK-----  
NP\_624311 DIIKKINETFVD-----KDFVPYQDI-----RINHTVILDDP-----  
32708309 LVMRKIEN-----VPTGP---NNKPKL---PVVISQCG---EM-----  
A45981 GVARILENV-----EVKG-----EKPAK---LCVIAECG---ELKEGDD  
J40763 EVVREIENQKTD-----AASKPFAE-----VRILSCGELIPKSKVK-  
A47328 EVIEQIENLKTD-----AASRPYAD-----VRVIDCGVLATKSIKDV  
KP\_531396 -IVEAMER-----FGSRNGRT-----SKK-----ITIADCG---QLERYQF  
KP\_525294 -IVEAMER-----CGSRNGKT-----SKK-----ITIADCE---QL-----  
KP\_523512 -IVEAMEH-----FGSRNGKT-----SKK-----ITTADCG---QLEYV--  
KP\_507866 -AISLVDSALSWWLSSQLPLETGTESNRKS--FLSKE-----LLVSTAPGDVEMQAVFA  
KP\_517783 -IVEAMEH-----FGYNGKKT-----SKK-----TTISDCG---QF-----  
KP\_517773 -IVEAMEH-----FGYRNGKT-----SKK-----ITIA-----  
KP\_526904 -ILEAMEC-----LGPGMERP-----ARRSP---FLTVDNSN---KFDL-CF  
KP\_516556 --GWMASM-----WPLA-----  
KP\_526001 -IVEAMER-----FGSRNGGT-----SKK-----ITTADCG---QL-----  
KP\_516021 ETLDELEKLPVNEKT-----YRPLND-----VHIKDITIHANPFAQ--  
KP\_515886 EVVREIENQKTD-----AASKPFAE-----VRILSCGELIPKSKGKN  
KP\_525218 -IVEAMEH-----FGYRNSKT-----SKK-----ITIADCG---QF-----  
KP\_507684 -IVEAMER-----FGSRNGKT-----SKK-----ITIADCG---QLE-----  
KP\_524688 LVMRKIEN-----VPTGP---NNKPKL---PVVISQCG---EM-----  
KP\_513346 -VLRQIEVA-----PDTKAS---KARGS-----RKNTDGO---ERNWGKS  
KP\_524598 -VVEAMER-----FGSRNGKT-----SKK-----ITIADCG---QLQOI--  
KP\_515004 SGWVSPWHSGVNPGL-----SWLCRG-----LPPAHCHTWSRLCGLAP  
KP\_523437 -LWRPWST-----LGPGMAKT-----SKK-----ITIANCG---QLE-----  
KP\_520485 --GKTSKK-----ISI ADCRQ---L-----  
KP\_519076 -IVEAMER-----FGSRNGKT-----SKK-----ITIADCG---QLE-----  
KP\_527705 -FGGHRAI-----WVQEWQDQ---QEDHH---C-----  
KP\_527529 -----  
KP\_518678 -----  
CSMSA -IVEAMER-----FGSRNGKT-----SKK-----ITISDCG---QL-----  
NP\_598845 -VVKKIES-----FGSKSGKT-----SKK-----IVITDCG---QLS-----  
AAH58369 GMVNRVGMVETNSQ-----DRPVDD-----VKILKAYPSG-----  
A56861 -VVRKVEST-----KTDSRD---KPLKD-----VII VDSG---KIEVEKP  
A40047 -VVHSIELQ-----ATDGHD---RPLTD-----CTIVNSG---KIDVKTP  
NKCR\_MOUSE EVIEQIENLKTD-----AASRPYAD-----VRVIDCGVLATKLT KDV  
AAH61645 ETLDELEKLPVNEKT-----YRPLND-----VHIKDITIHANPFAQ--

3AC41068 -TLTAMENVESDPKT-----DRPKEE-----VLICTTTFVDPYEEAD  
3AC34686 GVARTLENV-----EVNG-----EKPAK---LCVIAECG---ELKEGDD  
3AB30711 DIVKKINETFVD-----KDFVPYQDI-----RINHTVILDDPFDDPP  
3AB25645 LVMRKIEFQ-----APLGKRVQAWTHSLTC---PALTGILA---LILMPTE  
3AB23880 LVMRKIEN-----VPTGP-----NNKPKL---PVVISQCG---EM-----  
NF00527760 -TVRKIES-----FGSPKGSV-----SRR-----ICITECG---QL-----  
NF01138503 EVVQRIFNVKVNPQT-----DKPYED-----VSIINITVK-----  
NF00510830 -VLRQIEAQ-----GSKDG---KPKQK-----VMIADCG---EYM-----  
NF00510932 GMVNRVGMVETNSQ-----DRPVDD-----VKILKAYPSG-----  
NF01595779 -IVEAMEC-----FGSRNGKT-----SKK-----ITIYDCG---QL-----  
NF02014914 -TVEAMEH-----FGSRNGKT-----SKK-----ITISDCG---QL-----  
NF01930249 -IVEAMER-----FGSRNGKT-----SKK-----ITISYCR---QL-----  
NF01929278 -IVDAMER-----FGSRNGKT-----SKK-----ITISDCG---QL-----  
NF00523006 -IVEAMER-----FGSRNGKT-----SKK-----ITISDCG---QL-----  
NF00508381 -IVEAMER-----FGSRNGKT-----SKK-----ITISDCG---QL-----  
NF01215170 ETLDELEKLPVNEKT-----YRPFND-----VHIKDITIHANPFAQ--  
CSRTA -IVEAMER-----FGSRNGKT-----SKK-----ITISDCG---QL-----  
NP\_783638 ETLDELEKLPVNEKT-----YRPLND-----VHIKDITIHANPFAQ--  
NF01612782 GVARMLENV-----EVNG-----EKPAK---LCVIAE-----  
NF01612825 -VLRQIEAQ-----GSKDG---KPKQK-----VIIADCG---EYM-----  
NF01607941 SVARMLENG-----EVNG-----EPAK---LCVIAECG---ELKEGDD  
NF01607846 -VVEVVER-----LGPGMARP-----ARRSP---FPTVDDSN---FFDLWAF  
NF01609144 -VVHSIELQ-----ATDDHD---RPLTD-----CTIVNSG---KIDVKTP  
NF01608897 -GHFTHQT-----IPSVAQES-----APTPS---ARNTL-----  
NP\_758443 -VVKKIES-----FGSKSGKT-----SKK-----IVITDCG---QLS-----  
AAH61971 -VVRKVENT-----KTDSRD---KPLKD-----VIIVDCG---KIEVEKP  
G2828710 EVVREIENQKTD-----AASKPFAE-----VRILSCGELVPKSKVKK  
338388 -VVKKIES-----YGSQSGKT-----SKK-----IIVANS---SL-----  
AF132148 EVLRKLNDIAIVD-----DSFRPYQDI-----RITHTVVLEDPFPNP-  
NP\_611113 -TLQKMEIEVDN-K-----DRPIED-----III ESSQV-----  
NP\_611695 -VVRQIENS-----ATDARD---RPVKD-----VVIANS---TLPVSEA  
NP\_610590 DALDELEKLPVNPKN-----YRPHVD-----K KINGVTIHANPLAT--  
NP\_648697 -IVQKVES-----YGSQDGKT-----SKK-----VIIEDCG---AL-----  
NP\_648508 TIYNMLKLEDGIVD-----HQERPMHAH-----RIVSTEVLS-----  
NP\_648338 GIVAEME-----QNCTDEGDP-----TAP-----IVIRDCG---EIAHNED  
NP\_476656 DTIYAIEDVKTDTD-----DFPVEP-----VVISNCGE-----  
NP\_523874 EVVKRIGMVETDKN-----DRPVDP-----LRI IKAKVEKL-----  
NP\_523773 -VVRKMERC-----GSKSG---TPSQK-----IVIYSCG---ELK-----  
NP\_610224 LIMRKIEN-----VPTGP-----NNKPKL---PVTISQCG---QM-----  
NP\_733246 ELVRQLEGLPVD-----RNSRPLQD-----AAIANCGELVRQTKA--  
NP\_611935 EVVLNICNSKANPKT-----DKPYDD-----IKIISIHLN-----  
EAA03569 GIVGEME-----RHSNDDGDP-----LVP-----IVIEDCG---QIAPGDD  
EAA03948 -VVRKIEST-----ATDGRD---RPTND-----VEIADSG---SLPVSEP  
EAA04625 LIMRKIEN-----VPTGP-----NNKPKL---PVVISQCG---QL-----  
EAA06299 -VVRKIES-----FGSHSGKP-----SKQ-----ITVANCG---QL-----  
EAA08127 DLVRQLEQLPVD-----RNSRPLQD-----AMVSNCGELVRQVKGKT  
EAA09839 -VLTEMERVEVDN-R-----DRPIEN-----IFIQRAQV-----  
EAA10133 EIVQNICNAKTNPKT-----DKPYDE-----IRIISINLS-----  
EAL39647 EVLRKLNEVICD-----DRHRPYKDV-----RITHTVVLDLDDPFED--  
EAA13913 EALDELEKLTVPNPKT-----YRPVVE-----KKINSVTIHANPLAG--  
EAA13914 AVVHKVEQVRTDTD-----DYPVKP-----VIIEDCGDLPILGPFTV  
EAA14200 -VVRKMERC-----GSKGG---RVQOK-----VTIVACG---EVK-----

EAA01474 DLVEKISQAG-----DSAGKPQS-----TVLIANCG---KWQ----  
KP\_321072 DLVEKISQAG-----DSAGKPQS-----TVLIANCG---KWQ----  
KP\_320182 QVVKRIGLVETDKN-----DRPVEP-----VKIVKGKVEKY-----  
KP\_319131 AVVHKVEQVRTDTD-----DYPVKP-----VII-----  
KP\_311949 RFTAEQPQLP-----  
CAI11739 EVLKRLEAVP-----TYNERPKQD-----CKIVACG-IFEF-----  
AAQ91263 -VVDAIEK-----KGSSSGKC-----SAK-----VVIANCG---QL-----  
NP\_001004626 -TVSLMES-----YGLHDGGT-----VKK-----VAITDCG---ELK-----  
NP\_001002065 GVVKMLEAM-----ETKE-----DNPVK---PCVIAECG---EHKAGDD  
NP\_957499 LVMRKIEAV-----VFINF--IGTAQNKIS---STITLPNA---DL-----  
AAQ94596 LVMRKIENV-----P-----TGPNNKPKL---PIVVSQCG---EM-----  
NP\_998184 -VVRKIEAT-----KTDGRD---KPLKD-----VSIHDSG---KIDVEKP  
NP\_001002146 ETLDEIEKLPVNEKT-----FRPLND-----VRIKDVTIHANPFAG--  
AAQ91264 -VIKKVEG-----FGSSSGKT-----SAK-----IIIADCG---QL-----  
AAH59458 -VIKKVEG-----FGSSSGKT-----SAK-----IIIADCG---QL-----  
AAH56814 DVLAKINETFVD-----NDFIPFQDI-----RINHTVILDDPFDDPA  
AAH62863 -VIKKVEG-----FGSSSGKT-----SAK-----IIIADCG---QL-----  
NP\_998629 DVIRMIESQKTD-----TNSRPYAE-----VKVLNCGELVPKSKAKK  
NP\_957285 -TLSAMENVESDPKT-----DKPKSE-----IKILSTS-----  
NP\_506749 -IVSKVEG-----NGSSSGTP-----KS-----ECLIADCG---QL-----  
NP\_506561 -VVKKIEK-----MGSRS GAP---AK-----TVTIADCG---ELKSE--  
NP\_504522 EILETIVKEYGS-----ENGRPGKK-----LIVHNCGHL-----  
NP\_506751 -VVKAVES-----NGSQSGKP-----VK-----DCMIADCG---QLKA---  
NP\_497745 NVVDYIDNLAVD-----DKSKPLAK-----VLISNCGELVKK-----  
NP\_499828 -VVKAIES-----KGS EDGAP-----SA-----PCVIADCG---EMK-----  
NP\_497257 -VVREIEAT-----PKGAGD---RPIED-----VVIANAG---HIPVENP  
NP\_509506 EVVKA IENLETG-----NEDKPVCK-----VEITHCGEMVRK-----  
NP\_503034 -IVRQVEQQ-----GTPSGK---PQMV-----VKIVESG---EIE-----  
NP\_501118 KVIANMGRVDTDNH-----DRPKIE-----IRILKAYPSESSVLS--  
NP\_496562 TLFNMLKITEVET-----EGDRPVTFY-----KITGARIDN-----  
NP\_495855 LTVRKIEN-----VPTGA-----NNKPKL---PIVVVQCG---QL-----  
NP\_496337 -TLTTIEKLETEEGT-----DVPMVS-----VVIMRAEVFVDPF----  
NP\_495417 DTLEEEIETIKVDNK-----YRPLVQ-----QK-----  
NP\_493378 SVVQRINQVSTFERS-----GRPRES-----IQIMSISLK-----  
NP\_492343 ETLEKLNEQLAD-----TNNRPFKDI-----RISHTIVLDDPFDEDA  
NP\_493624 -VVRKIEQT-----EKLP GD---RPKQD-----VIIAASG---HIAVDTP  
P06073 -VVKAI EK-----VGSSSGKP-----TK-----PVV VADCG---QLS----  
NP\_175776 DTLTRINEAYVD-----PKNRPYKNI-----RIKHTHILDDPFDDPP  
NP\_567029 -VVRKIEA-----QGQDSG---VPKAN-----VIIIFASG---EVSL---  
NP\_201554 -TLAAMENVPVDE-S-----DRPLEE-----IKIIEASV FV-----  
NP\_200679 -VVYKVEA-----EGN QSG---TPKSK-----VVIVDSG---ELPL---  
NP\_181407 LVMRKIEN-----VAIGP---NNRPKL---AVVITECG---EM-----  
NP\_191166 -VVKAMED-----VGSDMGNP-----SE-----RVVIEDCG---ELKNPSS  
NP\_171696 EVLDIMEKTQTGPG-----DRPLAE-----IRLNRVTIHANPLAG--  
NP\_195222 -NVFAIEGG-----AGTYSG---KPRKK-----VVIADSG---EIPKDKW  
NP\_195213 -VVKAI EK-----VGSDSGKT-----SK-----VVTITDCG---QLS---  
NP\_196816 -VVKLIEEQ-----ETDRGD---RPRKK-----VVIADCG---QLPMSEA  
NP\_188932 DLMRNIEKE-----VITTTTRTP-----SKP-----VVIADCG---ELSDYRS  
NP\_191762 -LVRTL ESQ-----ETRAFD---VPKKG-----CRIYACG---ELPLDA-  
NP\_190046 DVVQOGIEKVKTD-KN-----DRPYQD-----VKILNVTVPKS-----  
NP\_180557 -VVYKIEA-----EGKQSG---TPKSK-----VVIADSG---ELPL---  
NP\_181157 EVIKRLG SVQTDNT-----DRPIHE-----VKILRTKVID-----

|           |                                                      |
|-----------|------------------------------------------------------|
| NP_179251 | -VVRDIEK-----VGSDSGRT-----SK-----PVVIADCG---QIS----  |
| NP_179709 | -VVKAIEK-----IGSSSGKP-----TK-----PVVIADCG---EISS---  |
| AAK02067  | GVVRSIEHVSIE-----EQSCPSQD-----VVIHDC-----            |
| P82869    | DILGQIKTG-----DIIKSAK-----LIEGQDRLSLPVQNNN           |
| F05352    | EILKKIE-----RVGDEEGKP-----TVS-----VKIIRCG---EY-----  |
| F49181    | AVIKKME-----LVGTSDGKP-----TSP-----VKIIDCG---ETS----  |
| F05314    | SIYNLLRLGEVDTS-----KDDRPLDPAP-----KILSVEVLW-----     |
| CSZPA     | -VVKKVESL-----GSNSG-----ATRAR-----IVIDKCG---TV-----  |
| F313994   | SVCKRMGLIRTDSS-----DRPIEP-----LKIIKAVALDKCGTVPN      |
| F1335804  | -IVKKISKA-----ETDNRD---KPLED-----VKIIKSG---QLSQENV   |
| F1331567  | DIVKEIES-----TPVG-----ANSRPKS---NVAIVECG---EM-----   |
| 362327    | STVRTIENL-----ETKN-----DDPVV---PVVIEECG---TCTKDQI    |
| 362590    | -VLDALEKVPTNS-N-----DHPKLP-----IKLEDIIIFVDPFEEWK     |
| F1294518  | DVVHRIEQGETD-KY-----DRPLEP-----TKIINISIVYT-----      |
| F39728    | DTLLKINDAICD-----EEGQPYRDI-----RIKHTIILDDPFEDPP      |
| F1263915  | TIYNVVRRISELED-----ANQRPVFPF-----KIISTEVID-----      |
| CSBY      | -IVKKVESL-----GSPSG-----ATKAR-----IVVAKSG---EL-----  |
| 330507    | -IVKAIESY-----GTASG-----KPRAE-----IVIEEAG---EL-----  |
| 312324    | -VVNYIQHV-----SRDAND---KPLEA-----VKIAKCG---EWTPELS   |
| 357050    | SVVRTIENCR-----VDSGVP-----ESDVRI SDCGVWEKT-----      |
| 348567    | RIVRLIENQ-----QCDQEN-----NKPLR---DVKIDDCG---VLPDD--  |
| CSBYC3    | QLMDAIQYTETD-----EYGKPOHE-----LRFLYFVLEILKISNIL      |
| 363359    | DLMDKLANVKTD-----ENGKPEQP-----ITIGYISSQEHRIQ---      |
| 338324    | -VVHYIENV-----KTDSRN---MPVKE-----VIIVESG---ELETVPL   |
| FcCyP19   | -VVKAMEA-----VGSQTGKT-----SK-----PVKIEASG---QL-----  |
| FcCyP20   | RTLKKLEELRVDDKY-----NVLDKD-----AKIVGTTVMYNPFAEGH     |
| FcCyP21.1 | -VVKKVENT-----KTGLND---KPKKA-----VKINDCG---VL-----   |
| FcCyP21.3 | -VIEKVEA-----NGSRSGAT-----RQ-----PILITDCG---EVKNN--  |
| FcCyP24.3 | DHVKAIEEVGTPHG-----KPSKT-----VLVSDCGVLKEAS----       |
| FcCyP26   | DLVERVA-A-----LCGSRGVP-----VSR-----AWITDCG---QSSGAKL |
| FcCyP28   | -VRRRVER-----LGSESGKT-----RG-----RIIIADCG---EVVVPEP  |
| FcCyP30   | DAVEEIERVPLTP-----SGFPSRR-----VTIVDCGRL-----         |
| FcCyP35.1 | NVVEAIHDVD-----VKHNQSP-----CKVITISDCGVIDLTDN---      |
| FcCyP35.3 | EFLREVAPYG-----EINGNPSR-----FVVVVDCGVGPLPETLGI       |
| FcCyP40   | NTVRALEHTETG-----ANDKPVKP-----CVIVDCGVTD-----        |
| FcCyP110  | PVVRAIVQTARDD--DDK--PIAPVIRR-----VVATERTTEK-----     |
| AAT44353  | -VVKAMEA-----TGSQSGKP-----SKP-----IKIENCG---QL-----  |
| EAL37431  | -VVKSEKEC-----GSQNGKP-----TKS-----VCITASG---VLS----  |
| EAL37232  | ETLNALENCPSDKS-----HKPIDE-----IIIKDIVIHSNPIADQE      |
| EAL37110  | ESKLTTLTKIEQLGSYS-----GRTSKR-----IEVTACSHYSGTPPSAK   |
| EAL36265  | PILSKLNQVITD-----ENSIPLQKV-----MILHTYILDDPFEDSL      |
| EAL35294  | ATLKKIEN-----ATVLP---PNSKPKI---PIIIYECG---QL-----    |
| J68268    | -VVEGMEA-----VGSQTGST-----DK-----PVMISESG---QL-----  |
| J68269    | -VVKAVEG-----VGSQSGST-----TK-----AVKIDSCG---QL-----  |
| AAQ15626  | -VIEKVET-----NGSQSGAT-----RQ-----PITIMDCG---QIEQG--  |
| AAB07896  | -VVKAMEA-----VGSQGGST-----SK-----PVKIDSCG---QL-----  |
| AAK14937  | -VVRAVEA-----VGTQSGKP-----TKP-----VV-----            |
| CAC18541  | LVLKKIEN-----VPTGP---HNRPKV---PVVITQCG---EM-----     |
| A45000    | -VVKDMEA-----VGSSSGKT-----SQE-----VLITDCG---QL-----  |
| Q9Y0F5    | ETLNTLENCPSDKS-----HKPIDE-----IIIKDIVIHSNPIADQE      |
| J47811    | -VVKAVES-----KGSQSGRT-----SA-----DIVISDCG---QL-----  |
| J50388    | -VVKKMESV-----GSKSG---KVKEP-----VIISRCG---ELI----    |

L46884 -VVKKMESL-----GSTS-----KPSK-----IIIEDCG---EC-----  
493420 -VVKKMESV-----GSKSG---KVKEP-----VTISRCG---ELI-----  
J50389 -VVRQIENM-----QTDSRD---RPVKS-----VKIANCG---HIPVDVP  
3992633 -IVRQIESE-----TTDSRD---RPVKS-----IKIASCG---HIPVEIP  
3323073 -VVKKMESV-----GSKSG---KVKEP-----VIISRCG---ELI-----  
352758 -VVVRIEKT-----KTNSHD---QPGEAREDRCQWRAVERE---GVRWVVA  
31203753 -VVKAMEA-----VGSRS GTT---SK-----PVRVSACG---QL-----  
CAB58290 HTLEQISHMQVDADFLYSPVTVMKCSTALLSRGTAPQSATARAAPASCVVTSQYPSSIL  
CAB58298 -VVKKVER-----LGSSSGKT-----RS-----R-----  
AAF69736 NTVRAVEQTPTA-----ANDKPVVD-----CVIAGCGTLDALPE---  
AAD46565 -VVLRIEKT-----KTNSHD---RPVKP-----VKIVASG---EL-----  
A53522 ESWPTVQAIEALGGSG-----GRPSKV-----AKITDIGLLE-----  
NP\_702112 SIYNLLKFNNIKTN-----KHDKPIEDIP-----YIEYVKIIE-----  
NP\_701512 -IIRMIENVGT-----KLGHPMYN-----VRIVNCGLYKGLEKD--  
NP\_701389 DTLSFIEEQTLIG-----KPKKQ-----VFIYNCGVIPLDKIK--  
NP\_701030 DVLSVLENEPVGEK-----SRPIKD-----IIIETITIHANPIAEEE  
NF01067443 HILRAIEMLPTCN-----NGNPKVL-----LYISDCNEVNEAFFKKE  
NF01067965 ILLKKIEN-----VSVTP---YIYKPKI---AINIVECG---EL-----  
NF01065889 KIVLDIEKVRTD-KR-----DKPLED-----IKILNIKINN-----  
NF00926916 -VVREMEKE-----GAKSGYV---KRS-----VVITDCG---EW-----  
352760 DKLVHIEAVGTDSGE-----PLKR-----VLVKESGELPL-----  
J10322 ILLKKIEN-----VSVTP---YIYKPKI---AINIVECG---EL-----  
CAB39039 -VVREMEKE-----GAKSGYV---KRS-----VVITDCG---EL-----  
CAD51648 TCIENTIASVQTTAT-----NKPIFD-----VKILRTSTAVNVD---  
NF01497907 -VVRDMERE-----GSNSGYV---KRP-----VVITNCG---EL-----  
NF01497552 KVVLDIEKVRTD-KR-----DKPLDE-----IKILNIKINH-----  
NF01497379 EKL VQIEAVGTDSGK-----PLSR-----VLVTKSGVL-----  
NF01497199 LLLKKIEN-----VSVTP---YIYKPKI---PINVVECG---EL-----  
NF01496968 HIIRAIELLPVNN-----FYQPKVN-----IYISDCNEIHE-----  
NF01495390 -IIRTIETMGT-----KLG NPMYD-----IKIIN-----  
NF01495324 TCIENTIASVQTTAT-----NKPIFD-----LKILRTSTAVNAD---  
NF01493974 DTLSYIEEQATLIG-----KPKKQ-----VYIYNCGVIPLDKIKYK  
NF01493918 --YNLIKFN NIKTN-----KNDEPIEDIP-----YIEYVKVIE-----  
3316521 -TLELFKKN-----SSQOG---KPKTT-----IKIVDSG---VV-----  
CAC35733 EVLQQINRTHID-----DDGRPLLNI-----RIKHTYILDDPFEDIP  
J47812 -VVQKIEA-----VGSQSGKT---SK-----DVVVANCG---QL-----  
J47813 -VVKAIES-----KGSQSGRT---SA-----DVVITDCG---QL-----  
32624966 DVVKMIENN-----PTGAQ---DKPKK---AVVIADCG---QL-----  
31317902 -TLAAIEKVETDE-G-----SRPIAD-----VLFLNSEIFVDPFEEAE  
31319851 -TLNAIEKIETDE-S-----SRPIID-----VIFLNAEIFVDPFEEAE  
33057040 -TLNTIEKIETDE-S-----GRPIVD-----VIFLNAEIFVDPFEEAE  
AAB81959 -IVEAMER-----FGSRNGKT---SKK-----ITIADCG---QLE---  
AF023860 -IVEAMER-----FGSRNGKT---SKK-----ITIADCG---QLE---  
AAB81961 -IVEAMER-----FGSRNGKT---SKK-----ITIADCG---QLE---  
AAF22215 -IVEAMEH-----FGSENGKT---SKK-----ITIANCG---QL-----  
AF243140\_1 -IVEAMER-----FGSRNGKT---SKK-----ITIADCG---QI-----  
AF252388 -VVKKIES-----FGSKSGET---S-----  
CSBOAB -IVEAMER-----FGSRNGKT---SKK-----ITIADCG---QI-----  
NF01922219 -VLEDLEA-----VGSKSGKP---SHE-----VEIVDCG---QL-----  
NF01725587 -VVKKIES-----YGSQSGKT---SEK-----IIVADCG---QL-----  
NF01897292 FFWKAERVVKAFHMT-----LAIEK-----LKTRSF SYNST-----  
CSHYAC -IVEAMER-----FGSRNGKT---SKK-----ITISDCG---QL-----



NF00071027 -IVEAMER-----FGSRNGKT-----SKK-----ITIADCG---QLE-----  
 NF01951405 -TLTAMENVESDPKT-----  
 NF01059378 -IVEAMER-----FGSRNGKT-----SKK-----ITIADCG---QLE-----  
 NF01105745 -VVKNIES-----VGSQSGQT-----KK-----PVVANC---EL-----  
 NF00495096 -IVEAMER-----FGSRNGKT-----SKK-----ITISDCG---QL-----  
 NF01053198 -IVKAI EK-----VGSSSGRT-----SK-----PVVADCG---QLS-----  
 CSPGA -IVEAMER-----FGSRNGKT-----SKK-----ITIADCG---QI-----  
 NF01950932 ETLDELEKLPVNEKT-----YRPLND-----VHIKDITIHANPFAL--  
 NF01951326 GVVKILENV-----EVNG-----ENPAK---LCVIAECG---ELKEGDD  
 NF00909389 -VVKDIEK-----VGSQSGRT-----SK-----PVVIANCG---QPS-----  
 NF01286555 -VVKAI EK-----VGSSGGRT-----SR-----PVVADCG---QLS-----  
 NF01737225 -VVRAIEK-----VGSQSGKT-----SK-----PVVADCG---QIS-----  
 NF01590839 NVVDSIQQGNKIKTVK-----IIRTGNE-----AKAFKTDQEA FYKYLAE  
 AAH51602 GTLNRLGMVETDSQ-----DRPLDE-----VQVLRAYPSG-----  
 AAT69672 -VVKTMDR-----LGSQSGKP-----SKK-----VVITNSG---QL-----  
 AAH54186 -VVKTMDR-----LGSQSGKP-----SKK-----VVITNSG---QL-----  
 AAH54168 -IVRKIEST-----KTDGRD---KPLKD-----VVIADCG---KIEVEKP  
 NF01208049 -TVSAMEKVDTDHKT-----DRPKEE-----IRIECTTVFVDPYEEAD  
 NF01844632 DVVREIENQKTD-----ASSKPSVE-----ISIQNCGELVQKSKAKK  
 NF01844615 TIYNILRLAEVDIG-----EDERPVNPH-----KIKCTEVL F-----  
 NF01915773 GTLNRLGMVETDSQ-----DRSLDD-----VRILRAYPSG-----  
 NF01915657 DTLDELEKLPVHEKS-----FRPLTE-----VRIKDITIHANPFAL--  
 NF01557564 GIVKMLENV-----EVKD-----EKPAK---MCVIAECG---ELNDRDE  
 AAH41536 -IVENLDR-----LGSQSGKP-----SKK-----VVITNCG---QL-----  
 AAH85963 EVVREIENQKTD-----AASKPFAE-----VRILSCGELIPKSKVKK  
 AAH64250 LVMRKIEN-----VPTGP-----NNKPKL---PVVIAQCG---EM-----  
 AAH61335 GIVKMLENV-----EVKD-----EKPAK---MCVIAECG---ELNDRDE  
 AAH59741 -VVRNMEK-----LGSQSGKP-----AKK-----IVIANCG---QL-----  
 AAH67931 DLVREIENQKTD-----ASSKPSVD-----VSIQNCGELVQKSKAKK  
 AAH44993 -TVSAMEKVDTDHKT-----DRPKEE-----IRIECTTVFVDPYEEAD  
 A40516 -VVRKVENT-----KTDSRD---KPLKD-----VTIADCG---TIEVEKP  
 CYPB\_BOVIN -VVRKVEST-----KTDGRD---KPLKD-----VTIADCG---KIEVEKP  
 AAR19276 -IVRKIES-----FGSKNGKP-----SKK-----IIISDCG---DMK-----  
 A46579 GVAKILENV-----EVKG-----EKPAK---LCVIAECG---ELKEGDD  
 AAV40687 SVVRTIENN-----PATNG-----DVPKE---PVVIADCG---QLSSDDP  
 NF01637248 -IVKKIEGY-----GSQSG-----KPSAT-----IKISASG---TV-----  
 CYPB\_BOVIN -TVKKIES-----FGSPKGSV-----SRR-----IIITECG---QI-----  
 CYPB\_CALVI DTVYAI EDVKTDTD-----DHPIDP-----VIVVNCGEMPTEPYEFY  
 E1317906 -TLTTIEKLETEEGT-----DVPMVN-----VMIMRAEVFVDPFEEAE  
 AAB87888 -IVKKIES-----FGSQSGKT-----SKK-----I-----  
 AAB87889 -IVKKIES-----FGSQSGKT-----SKK-----I-----  
 J9XZZ5 -VVKKMEA-----VGSESGKT-----KQP-----VLIANS---QL-----  
 363995 -VVKKLES-----LGSQSGKT-----NKK-----IAVVDCG---QI-----  
 31703696 -I IKKVES-----YGSQSGKT-----SKK-----ITIADCG---QL-----  
 J36797 -VVKEVET-----FGTQSASP-----SSR-----SSIADCG---QL-----  
 AF017738 TLFNMLRLGECETG-----NDDKPLRTQ-----KILQVEILS-----  
 L37292 EVVTKIEYLKTN-----SKNRPLAD-----VVILNCGELVRRKKRQH  
 AAS01736 -VVKAI EK-----VGS-----  
 AA061985 LTLRCLSPLWLQ-----LKHEGKS-----LKNLGRN-----  
 CAC80550 -IVKAI EK-----VGSSSGRT-----SK-----PVQIADCG---QLS-----  
 AA063777 -VVKAI EK-----VGSSGGRT-----SR-----PVVADCG---QLS-----  
 353522 -VVKMMEAE-----GRSNGQP-----KCA-----VEISSCG---QLS-----

|            |                                                                |
|------------|----------------------------------------------------------------|
| 3280557    | FVVRAIEKNPTSKGEN-----IKDRPILA-----VVITDCGMLELEKPFVTV           |
| J70827     | EVVTKIECLKTN-----SKNRPLAD-----VIIINCGELVRRKKRHH                |
| J70884     | DVLTKLEYLRTN-----FKNRPLGD-----VVILNCGELVRRKKRON                |
| J55771     | EY--TLQAI EATGTDS-----GKPSVQ-----TVIKSCK-----VKK               |
| 01024669   | -VVRKIEST-----KTDSRD---KPVKD-----VVIADSG---TIPVETP             |
| 227879     | -VVKKMEA-----AGSQSGKT---TK-----PVVIANCG---QL-----              |
| AAD48910   | -IVKLLS-----IGSQSG---TPSKI-----AKISNSG---EL-----               |
| AAO51811   | KVVRTIED-----IPVNP---PPNRPKY---DVVITECG---QL-----              |
| AAF76472   | EVLDIMEKTQTGPG-----DRPLAE-----IRLNRVTIHANPLAG--                |
| AAP80861   | -VVYKVEA-----XGKQNG---TPKSK-----VVIADSG---EVPL---              |
| AAP73848   | LAVRKIEN-----VATGP---NNRPKL---ACVISECG---EM-----               |
| 3AB62329   | EIVKRLGSVQTDKS-----DRPIHE-----VKILRTVVKD-----                  |
| AAL75728   | GAVRAIDRT-----GTWSGKT---VKP-----VVITDCG---VL-----              |
| 348017     | -VVKAI EK-----VGSRGGST---AK-----PVVIADCG---QLS-----            |
| 348018     | -VVEKMEQ-----VGS GSGGT---AE-----RVLIEDCG---QLADDHA             |
| 3AD53622   | -VVYKIEA-----EGQ QSG---SPKSK-----VVIADSG---ELPM---             |
| 3AD53621   | -VVYKIEA-----EGQ QSG---SPKSK-----VVIADSG---ELPM---             |
| 3AD53620   | -VVYKIEA-----EGSQSG---TPRSK-----VLISDSG---ELK----              |
| KP_507188  | ATIPTYKPAERIRFFNDFFAQLIGDERAQTARALWDRP---LKT VYISDCGELKVTKPS-- |
| KP_483750  | DVVQQIEKVKTD-KN-----DKPYQD-----VKILNVTVPKT-----                |
| KP_483749  | PFVHIYDTH-----SGSN DP-----IISKE-----                           |
| KP_482125  | DYLADLKV G-----DVIESIQ-----VVSGLDNLANPS-----                   |
| KP_478742  | EVLSQIKTG-----DIIRSAK-----LVQGRERLVLPPPEAP-                    |
| KP_478741  | EVLSQIKTG-----DIIRSAK-----LVQGRERLVLPPPEAP-                    |
| NP_385690  | ENIDNIKRG-----EPVRDPD-----TIVSMRVAADA-----                     |
| NP_385689  | ENVDKIKLGDDANN-----GAVADPD-----RMISVKVGR-----                  |
| NP_349373  | EEVDRI SVKRDYSDK---PLEDQRIKT-----MEIETFGENYPEVEIIE             |
| 3AD45990   | DTITKINETYVD-----DKGRPFKDI-----RIRHTYVLDDPFDDPP                |
| 3AD45991   | DTLTKISETYVD-----DKGRPFKDI-----RIKHTYVLDDPFDDPP                |
| NP_908419  | EFVIT TGDAPELD-----ASALVVGR-----VVDGMDVLGKI-----               |
| NP_919903  | RKFKEFGKDARNIRFG-----PKQPGND-----IDVYLRPLVEDLKQLWK             |
| 3AD35839   | GVVRSVEHAPVG-----EADRPTSD-----VEIVDCGELPEGAD---                |
| AAU87301   | -VVREIEK-----VGS GSGRT---SK-----PVVIADSG---QLA----             |
| CAG90469   | -VVDYME NV-----STSYGD---RPAKE-----LKISAAG---EIAVEQN            |
| CAG88330   | -IVKKVESY-----GSGSG---ATKSR-----ITIDASG---EL-----              |
| CAG88054   | QVLEKINLSVVENL-----ETRLLKDI-----RITHTHNIY-----                 |
| CAG86818   | EAVKSIEDIETD-SD-----DKPLDQ-----VILLSTSLED-----                 |
| NF01109982 | -VVKKVEK-----FGSDSGKT---SKK-----IVIDASG---EC-----              |
| NF00686348 | EYVDAVEKG-----EPPAHP S-----IIVRASIGSDKIH PPT                   |
| NF00686217 | EYVDAVEKG-----EPPAHP S-----IIVRASIGSDKIH PPT                   |
| NF02138644 | -VVKEMEK-----VGS DGGNS---KS-----TVEIEECG---QIQEN--             |
| NF00926921 | -IVDKIQVV-----PKGFQD---RPTKD-----VKIVKCG---ELDMKEE             |
| NF00909931 | -VVKEIEK-----VGS SSGKT---SR-----PVAIADCG---QLS----             |
| NF00956595 | -VLRQMEAQ-----GAKDG---KTKQK-----VIISDCG---EYA----              |
| NF02035209 | -VVEAIQK-----VGS RGGTP---KN-----PL-----                        |
| NF01329591 | NVVDKIVNVPTG-NYG---MHQNVPKQP-----IKIISVQIKK-----               |
| CAG86678   | EAIETLESDES LNNQD---KTKKSGKPRGIWKES-----WIKHVEIHFNPFVEQ-       |
| CAG86274   | DTLDLLNSARTDKND-----RPKEE-----YVMSKITIET-----                  |
| CAG85447   | SIYNVVKINESELK-----SEETPMYPA-----EITDIKILV-----                |
| CAG85287   | -IVKKIEAQ-----GSGSG---APQSS-----IVIEECG---ELKDN--              |
| CAG84900   | SIVRQLERC-----D-KGEN---DKPVE---DWIISDCG---ELPSDYV              |
| CAG84822   | SVVREIERVN-----TDSQNIPT R-----EDIVLIEDCGDWT-----               |



|           |                       |                      |                     |
|-----------|-----------------------|----------------------|---------------------|
| YP_116397 | DVVDKIAGVSTG-SAG----  | MHQDVPVDD-----       | VIITSASLA-----      |
| YP_119877 | ATLDKIAALGQDDSNG----  | PGDGKPTSP-----       | VTIQSVRLD-----      |
| CAD25897  | ECLSLIRDIQKIDIDR----- | DRPVHP-----          | VRIVRSGIVEEGEEKYL   |
| CAD26352  | -VVHKIAKY-----        | GSESGQV---KGYR-----  | IEIRDCG---VLGSN--   |
| AAD17998  | -IVDKIQNV-----        | PKGRND---RPLK-----   | VKIVKSG---ELEMED    |
| G2959712  | -VVKKVEG-----         | YGSSSGKT---RA-----   | TFAIADCA---QLA----  |
| CSNCC     | KVVKALEAT-----        | GSSSGAI---RYSKK----- | PTIVDCG---AL-----   |
| AJ006689  | SVVKEIEAL-----        | GSSSGSV---RSNTR----- | PKIVNCG---EL-----   |
| AAF28343  | KVVQKMNAMQTN-----     | DKPIDE-----          | IRIIKATAN-----      |
| AAD50375  | DIVKKVENA-----        | ETDRS-----DRPKA---   | ACVIEDCG---QL-----  |
| AAK21908  | -VVRAIES-----         | VGSSSGKT---SR-----   | PVVIANC---QLS-----  |
| AAG13968  | -VIKPIEAL-----        | GSSSG---TPKTK-----   | VTIVNAG---TV-----   |
| 3AB58884  | -VIKPIEAL-----        | GSSSG---TPKTK-----   | VTIVNAG---TV-----   |
| E1363908  | -VVKAIEAE-----        | GSGSG---KPRSR-----   | IEIAKCG---VC-----   |
| AAD16142  | QVVKEIEAL-----        | GSSSGSV---RSAVK----- | PTIVDCG---EL-----   |
| G1764137  | -VVKAMEKT-----        | GSQSG---KTSSV-----   | LKIEDCG---TL-----   |
| Z32674    | DVVKALEAT-----        | GSGSGAV---KYNKR----- | ATIVKSG---EL-----   |
| JT0686    | NVVKALEAT-----        | GSGSGAI---KYNKK----- | ATIVDCG---EL-----   |
| CSCK      | -IVKKIESF-----        | GSGSG---ATSKK-----   | IVIEESG---QL-----   |
| NP_986490 | -VVKKVESM-----        | GSSSG---ATRAR-----   | IVISKSG---EL-----   |
| NP_985014 | -VVKAIESY-----        | GTGNG---QPSAK-----   | VVIEDAG---ELKE---   |
| NP_984799 | AVVREIEKEA-----       | VSDGVP-----          | EKAVRIAGCGEWTQ----- |
| NP_984183 | RVVRAIERQ-----        | ETAA---DRPLA---      | DVRIDACG---ILPASYE  |
| NP_982586 | ELLEKVRHLPLD-----     | EQGKPTSN-----        | LKIVGIHVDDLSIQNMD   |
| NP_982486 | -VVSVEAV-----         | PRNARD---VPDIS-----  | VRIVACG---ELQDTPA   |
| AAT09096  | -VVDKIEA-----         | AGSPSG---TPSKK-----  | VTIVDSG---ELTDKSE   |
| YP_014938 | DVVDEIANLPTG-----     | MQDKPVND-----        | VVIEKINIK-----      |
| NP_951950 | EVVDAIAGVKTG-NRA----  | GHSVDPVEN-----       | VFITRASVIE-----     |
| NP_935388 | DVIQQMASKPTK-SQG----  | YMRDIPVEP-----       | IVITKATLLP-----     |
| NP_907765 | DVVRRIEYTTD-RS-----   | DRPKKE-----          | QKILKAYLK-----      |
| 3AC91249  | RTLRLQKVG-----        | DTIQK-----           | AEILNCKAAAFNEYR--   |
| 3AC90551  | EVVAAIRAG-----        | DKILKAA-----         | ETS---APPAGAVPKT    |
| 3AC89441  | TNAEKLRI-----         | DKILSAK-----         | VVLGTEKFQPSAAGK-    |
| 3AC88914  | DVVDKIQVG-----        | DKILSAT-----         | VVSGGGDPVGGAPG-     |
| AAV50868  | DVLDKINSMIKPY-----    | AGRKYPT-----         | FSIGKCG-----        |
| AAV82698  | DVLEAMAKLESQAYSDEI--  | GWADVVPD-----        | PILKRIEVPQN-----    |
| AAV81872  | DVVNTIKDVKTG-SAG----  | FHQDVPVED-----       | VVIESVSVKD-----     |
| NP_736022 | ETVDKIASVEVT-----     | KSDQPKKE-----        | ITITSIKVIK-----     |
| NP_734780 | EVLDEIAAVE-----       | -----                | -----               |
| YP_085398 | ETVLNMR-----          | Q-----               | GDVMKEVKVWE-----    |
| NP_643098 | ELLSVTPRGPDPMG-----   | FYEDPAQR-----        | APIRAIRLASEVPA---   |
| NP_641352 | DVVDSVAQGDINTLT-----  | IEGDTDA-----         | VLAADRVAEWNKILA     |
| 3AB76758  | DILDTLKAG-----        | DKIESAT-----         | VVQGLDNLVQPSA--     |
| YP_129479 | DVVNAIAKAKTT-SKY----  | GHDDVPCEA-----       | IIIEKVTITE-----     |
| YP_129310 | DVVNKIKAVSTG-NSGY---  | VHQDVPVED-----       | VAINNVTIEE-----     |
| YP_129032 | STIEKMTDIPTT-TIGSL--  | GMKDVPOQP-----       | IVIKAIKIIK-----     |
| YP_101389 | KHMKEIYKMR-----       | KANDQDG-----         | LYALQD-----         |
| YP_087816 | NVVDKIAKVATG-RVG----  | MHRDVPKED-----       | VVIKSVTVE-----      |
| YP_087815 | DVVDKIKGVKTG-NAG----  | FHQDVPKED-----       | VVITSVTVE-----      |
| YP_076496 | LTQLESVEVRQNSFD----   | PVPSTPVNP-----       | PVIRKVTIAEE-----    |
| AAT91289  | -VVKEIAR-----         | GTASG---KPNAN-----   | IKIAKSG---T-----    |
| AAT91260  | -VIKEIAR-----         | GTXSG---KPNAN-----   | IKIAKSG---TV-----   |

NP\_868477 -VVKKIEAQ-----GSGSQ---TRKL-----IKITEAG---EVKE---  
NP\_867717 DVVDAIEQGD TMKTVR-----VTEE-----  
NP\_867158 DVREAISNMQVNNSTSNK--PTTDIVINN-----ATVFNDTENS-----  
NP\_865515 DRVSAMRRKD-----PSKTDEKK-----IQLPPDAIISA EVVRKG  
NP\_992233 DVVDKIKNVATG-RSG---MHQDVPKED-----VIIKSVTISE-----  
NP\_991569 DVVEKISQVQTE-NVG---PYQNV PVKP-----ITILSAKVLP-----  
NP\_280624 DVVETIGD---VETDA-----NDAPASE-----ITIDRVEIHE-----  
3AC18575 ATLDIAI AETGVEG--G---ATDGAPA EK-----VVIETATVA-----  
3AC16839 KVVDAIGT---TPTDR-----MDRPIEP-----VVIESVEI IK-----  
3AB82272 DVVDKIANVKT DYNDM---PDEPQVMAK-----VTVEN-AEGIEEPEIL-  
3AB99042 ATLDIAI A EVGTEG--G---TGDGAPAQE-----VRIESAAVA-----  
3AB97427 KVVDAIAT---TATDR-----YDRPADA-----VVIESVEITA-----  
3AC08372 ETLRQLRQG-----DKILSAK-----VVDGLENLVQPA-----  
3AC07690 DVVDTIQOG-----DRLQSAK-----VVAGLENLQOP-----  
YP\_072215 DVVEKISQVQTE-NVG---PYQNV PVKP-----ITILSAKVLP-----  
YP\_069574 DVVDKIKNVATG-RSG---MHQDVPKED-----VIIKSVTISE-----  
NP\_778719 DVVDAIAQGD IINKIT-----IEGDTDG-----VLALKTDRI IEWNSILA  
NP\_245881 DVVDKIKGVKTG-NKG---FHQDV PQEA-----IVITAVTVE-----  
NP\_245880 DVVDRISQVDTE-RSG---FHRDV PKAP-----VIIKSVTIE-----  
NP\_354667 EAVDKIKRGAGGN-----GEVSNPD-----RMIKVTVGKK-----  
NP\_354666 EAIDKIKRG-----EPVKDPD-----SIVSIKLASAA-----  
NP\_298502 DVVDAIAQGD IINKIT-----IEGDADS-----VLALKADRI IKWNSILA  
AAN39296 -VVKKVEK-----FGSDSGKT---SKK-----IVIDASG---EC-----  
AAQ24380 -VVTKVES-----YGSGNGKT---SAK-----IVIANSG---QL-----  
ZP\_00353225 QVVDAIAN---MATGP-----GDAPREP-----VVISSVDVERD-----  
ZP\_00244808 EVVDAIERVKTG-RQG---GHDDV PLED-----VVITRANEVA-----  
ZP\_00244807 DVVDRIKGVPTT-NKG---PHQNV PATP-----VLIKKATLEP-----  
ZP\_00358245 DVVYAIKQGD KM TKVT-----VQEL-----  
ZP\_00350273 EVVDQIKKVKTG-SKN---GHQDV PLEP-----VIERAEIV-----  
ZP\_00129494 DVVDAIGKLKTKPMGEHD-----DVPVDS-----VVITGAGLFDL-----  
ZP\_00130259 STIDAIKGVPTG-SYG---PFENV PLVP-----VVINKAVVMD-----  
ZP\_00136576 GVVDQIAKVPTT-RRN---GFADV PSDD-----VVILSAKRL-----  
NF01760157 DVVDKIGNLKT D-----ENDRPVER-----AYIKRAYIK-----

C SHUA -----  
NP\_839944 -----  
NP\_115861 -----  
NP\_570981 -----  
NP\_057143 -----  
C SHUB FAIAKE-----  
366681 -----  
A57545 -----  
A41581 -----  
A54204 FVVE-----  
364705 AQIA-----  
338552 -----  
NP\_624311 -----  
32708309 -----  
A45981 GGI-----  
J40763 -----  
A47328 -----

KP\_531396 VKKKGYVRL-----  
KP\_525294 -----  
KP\_523512 -----  
KP\_507866 LGLAPCGIPGVITGRMLLPE-----  
KP\_517783 -----  
KP\_517773 -----  
KP\_526904 ILTTRPFL-----  
KP\_516556 -----  
KP\_526001 -----  
KP\_516021 -----  
KP\_515886 EVHISENTYTYKISRDTLNS-----  
KP\_525218 -----  
KP\_507684 -----  
KP\_524688 -----  
KP\_513346 QKVESHTI-----  
KP\_524598 -----  
KP\_515004 AGFAVT-----  
KP\_523437 -----  
KP\_520485 -----  
KP\_519076 -----  
KP\_527705 -----  
KP\_527529 -----  
KP\_518678 -----  
CSMSA -----  
NP\_598845 -----  
AAH58369 -----  
A56861 FAIAKE-----  
A40047 FVVEVPDW-----  
NKCR\_MOUSE FEKKR-----  
AAH61645 -----  
3AC41068 AQIAQERK-----  
3AC34686 WGIFPKDGS GD SHPDFPEDAD-----  
3AB30711 DLLIPDRSPEPTKEQLDSGRIGADEEIDDF-----  
3AB25645 -----  
3AB23880 -----  
NF00527760 -----  
NF01138503 -----  
NF00510830 -----  
NF00510932 -----  
NF01595779 -----  
NF02014914 -----  
NF01930249 -----  
NF01929278 -----  
NF00523006 -----  
NF00508381 -----  
NF01215170 -----  
CSRTA -----  
NP\_783638 -----  
NF01612782 -----  
NF01612825 -----  
NF01607941 WGIFPKDGS GD CHPD-----  
NF01607846 YPSNHSFCS-----



NP\_506751  
NP\_497745  
NP\_499828  
NP\_497257  
NP\_509506  
NP\_503034  
NP\_501118  
NP\_496562  
NP\_495855  
NP\_496337  
NP\_495417  
NP\_493378  
NP\_492343  
NP\_493624  
P06073  
NP\_175776  
NP\_567029  
NP\_201554  
NP\_200679  
NP\_181407  
NP\_191166  
NP\_171696  
NP\_195222  
NP\_195213  
NP\_196816  
NP\_188932  
NP\_191762  
NP\_190046  
NP\_180557  
NP\_181157  
NP\_179251  
NP\_179709  
AAK02067  
P82869  
P05352  
P49181  
P05314  
CSZPA  
E313994  
E1335804  
E1331567  
362327  
362590  
E1294518  
P39728  
E1263915  
CSBY  
330507  
312324  
357050  
348567  
CSBYC3

FTV

-NPFDDLKPR-

RI

FSVE

DEER

ERC

-N-

TNGSQ

EDDGTDEL

EAPKPDVT

K

DLV

-NYFTDIKPRSTK-

S

DLHAAY



363359 --HAK-----  
338324 DNKDA-----  
FcCyP19 -----  
FcCyP20 IKLDV-----  
FcCyP21.1 -----  
FcCyP21.3 -----  
FcCyP24.3 -----  
FcCyP26 EEAQRALCGERALHSMGKEVLDLISPRY-----  
FcCyP28 KEQPTKQKDEV-----  
FcCyP30 -----  
FcCyP35.1 -----  
FcCyP35.3 -----  
FcCyP40 -----  
FcCyP110 -----  
AAT44353 -----  
EAL37431 -----  
EAL37232 ILD-----  
EAL37110 LEL-----  
EAL36265 QLLEIIPPN-----  
EAL35294 -----  
J68268 -----  
J68269 -----  
AAQ15626 -----  
AAB07896 -----  
AAK14937 -----  
CAC18541 -----  
A45000 -----  
Q9Y0F5 ILD-----  
J47811 -----  
J50388 -----  
L46884 -----  
M93420 -----  
J50389 FSVSNTDAAE-----  
G992633 FSVTNSDAVE-----  
E323073 -----  
S52758 -----  
E1203753 -----  
CAB58290 ATLE-----  
CAB58298 -----  
AAF69736 -----  
AAD46565 -----  
A53522 -----  
NP\_702112 -----NPFHHLVPS-----  
NP\_701512 -----  
NP\_701389 -----  
NP\_701030 SVDN-----  
NF01067443 KISSRQMYINNMFK-----  
NF01067965 -----  
NF01065889 -----  
NF00926916 -----  
S52760 -----  
J10322 -----

CAB39039 -----  
CAD51648 -----  
NF01497907 -----  
NF01497552 -----  
NF01497379 -----  
NF01497199 -----  
NF01496968 -----  
NF01495390 -----  
NF01495324 -----  
NF01493974 SRTNLNDYI IPEVEMPLLEKEIGFNENSDINELKRIYKNSKRF-----  
NF01493918 -----NPFHHLIPSIHYKEDKIKQKTEECSEIKPKKS-----  
E316521 -----  
CAC35733 NMLYPS-----  
J47812 -----  
J47813 -----  
G2624966 -----  
E1317902 AAV-----  
E1319851 IAV-----  
G3057040 KAV-----  
AAB81959 -----  
AF023860 -----  
AAB81961 -----  
AAF22215 -----  
AF243140\_1 -----  
AF252388 -----  
CSBOAB -----  
NF01922219 -----  
NF01725587 -----  
NF01897292 -----  
CSHYAC -----  
NF00071027 -----  
NF01951405 -----  
NF01059378 -----  
NF01105745 -----  
NF00495096 -----  
NF01053198 -----  
CSPGA -----  
NF01950932 -----  
NF01951326 WGIVPQDGS GDTYPDFPEDSDIDLKDVSI FL-----  
NF00909389 -----  
NF01286555 -----  
NF01737225 -----  
NF01590839 TKESEK-----  
AAH51602 -----  
AAT69672 -----  
AAH54186 -----  
AAH54168 FAIAKE-----  
NF01208049 AQVAAEREKTQKAE EERIKAQALLPKKEKRQEPKTYR-----  
NF01844632 ERKRHKSSSSSDSEDSSASDSSSDSSSDSKSEDEEKSKKKK-----  
NF01844615 -----NPFDDIIPRIDKKT KKDEEEEGKKS KAKGTKN-----  
NF01915773 -----  
NF01915657 -----



KP\_478742 -AES-----  
KP\_478741 -AES-----  
NP\_385690 -----  
NP\_385689 -----  
NP\_349373 E-----  
3AD45990 -----  
3AD45991 QLSELIPENS-----  
NP\_908419 -----  
NP\_919903 K-----  
3AD35839 -----  
AAU87301 -----  
CAG90469 AKDEL-----  
CAG88330 -----  
CAG88054 -----  
CAG86818 -----  
NF01109982 -----  
NF00686348 TEEVKAAVEKQEAINLAEQQKQEEEVRRNAMRSFLPNHARLLPMQNRRRLRQSH  
NF00686217 TEEVKAAVEKQEAINLAEQQKQEEEVRRNAMRSFLPNHARLLPMQNRRRLRQSH  
NF02138644 -----  
NF00926921 AEGEGTESPSKPDSEKEQAPVRDEI-----  
NF00909931 -----  
NF00956595 -----  
NF02035209 -----  
NF01329591 -----  
CAG86678 -----  
CAG86274 -----  
CAG85447 -----QYFDDLVESKEHIAEPAKK-----  
CAG85287 -----  
CAG84900 PVPTSVDGTDGDIYEEVM-----  
CAG84822 -----  
CAG84723 -----  
CAG79895 ETKEAEP-----  
CAG78939 -----  
CAG82238 VPVGNVDDGTGDD-----  
CAG81980 -----  
CAG81971 -----  
CAG81844 -----  
CAG84141 TQKAGADAGADAESRENKSGSRDRPKPKRK-----  
CAG84091 PFIGSQDGLTAD-----  
CAG83821 -----  
CAG76968 -----  
CAG62671 Y-----  
CAG76052 -----  
CAG59915 -----  
CAG58658 -----  
33777556 -----  
AAF65770 -----  
3AA25755 -----  
CSTO -----  
CSRP -----  
CSZM -----  
CYPH\_ALLCE -----

AAG01536 -----  
AAB51386 -----  
354833 -----  
K85185 -----  
Y08273 -----  
Y08320 -----  
E1226445 -----  
L32095 -----  
CAA10766 -----  
AAF69796 -----  
AAF69795 -----  
CSNCM -----  
NF01287451 GMREPSASP-----  
NF01527836 -----  
NF01488902 -----  
NF00648058 VSADTKTADAYGDEYE-----  
NF01487278 GLEGQSEWASPAYANEDEK-----  
NF01486260 -----  
NF00904102 GIHVEL-----  
NF01484914 GMREPSASP-----  
NF01484255 -----  
NF01483993 -----NPFDDMQKREKKPRPQQISRPTPAE-----  
NF01533203 -----  
NF01483647 KEKKQKEG-----  
371849 -----  
J17900 --NDAK-----  
NF00873669 -----  
NF01527595 -----  
NF01539217 -----  
D1035365 AEGE-----  
YP\_116397 -----  
YP\_119877 -----  
CAD25897 -----  
CAD26352 -----  
AAD17998 VANEG-----  
G2959712 -----  
CSNCC -----  
AJ006689 -----  
AAF28343 -----  
AAD50375 -----  
AAK21908 -----  
AAG13968 -----  
3AB58884 -----  
E1363908 -----  
AAD16142 -----  
G1764137 -----  
Z32674 -----  
JT0686 -----  
CSCK -----  
NP\_986490 -----  
NP\_985014 -----  
NP\_984799 -----
