# Supplementary material
Source: PubMed Central journal article supplement (PMC11115621)
Supplement: 18_2010_437_MOESM7_ESM.pdf [file 18_2010_437_MOESM7_ESM.pdf]

**Table Ts1.** Fraction of all 400 amino acid dimers in the human genomic database containing 37391 sequences with 17,863,015 amino acid residues as total. Please see at the end of this file for a full output from the program used for the production of the analysis shown below.

Analysis of the human genomic database

# Diad Total Fraction

```
-----
```

|    |    |        |             |
|----|----|--------|-------------|
| 1  | AA | 134116 | 0.007498345 |
| 2  | AR | 72892  | 0.004075348 |
| 3  | AN | 34598  | 0.001934353 |
| 4  | AD | 51028  | 0.002852945 |
| 5  | AC | 25965  | 0.001451688 |
| 6  | AQ | 60134  | 0.003362056 |
| 7  | AE | 86126  | 0.004815253 |
| 8  | AG | 95097  | 0.005316816 |
| 9  | AH | 29752  | 0.001663417 |
| 10 | AI | 48081  | 0.002688180 |
| 11 | AL | 130653 | 0.007304731 |
| 12 | AK | 58899  | 0.003293008 |
| 13 | AM | 24374  | 0.001362736 |
| 14 | AF | 48445  | 0.002708531 |
| 15 | AP | 84943  | 0.004749112 |
| 16 | AS | 106658 | 0.005963185 |
| 17 | AT | 66639  | 0.003725746 |
| 18 | AW | 15826  | 0.000884822 |
| 19 | AY | 26175  | 0.001463428 |
| 20 | AV | 85514  | 0.004781037 |
| 21 | RA | 77148  | 0.004313299 |
| 22 | RR | 86555  | 0.004839238 |
| 23 | RN | 37026  | 0.002070101 |
| 24 | RD | 49091  | 0.002744648 |
| 25 | RC | 23349  | 0.001305429 |
| 26 | RQ | 47744  | 0.002669338 |
| 27 | RE | 72588  | 0.004058352 |
| 28 | RG | 74481  | 0.004164188 |
| 29 | RH | 29703  | 0.001660677 |
| 30 | RI | 42871  | 0.002396892 |
| 31 | RL | 99137  | 0.005542690 |
| 32 | RK | 64875  | 0.003627122 |
| 33 | RM | 19024  | 0.001063620 |
| 34 | RF | 32431  | 0.001813198 |
| 35 | RP | 65675  | 0.003671850 |
| 36 | RS | 79568  | 0.004448599 |
| 37 | RT | 51026  | 0.002852833 |
| 38 | RW | 13695  | 0.000765679 |
| 39 | RY | 24519  | 0.001370843 |
| 40 | RV | 59081  | 0.003303183 |
| 41 | NA | 35339  | 0.001975782 |
| 42 | NR | 32004  | 0.001789324 |

|    |    |       |             |
|----|----|-------|-------------|
| 43 | NN | 25478 | 0.001424460 |
| 44 | ND | 25417 | 0.001421049 |
| 45 | NC | 14747 | 0.000824496 |
| 46 | NQ | 27976 | 0.001564121 |
| 47 | NE | 38387 | 0.002146194 |
| 48 | NG | 42154 | 0.002356805 |
| 49 | NH | 16684 | 0.000932792 |
| 50 | NI | 35551 | 0.001987635 |
| 51 | NL | 63827 | 0.003568529 |
| 52 | NK | 37124 | 0.002075581 |
| 53 | NM | 14155 | 0.000791398 |
| 54 | NF | 24959 | 0.001395443 |
| 55 | NP | 37851 | 0.002116227 |
| 56 | NS | 53839 | 0.003010106 |
| 57 | NT | 33727 | 0.001885656 |
| 58 | NW | 7872  | 0.000440119 |
| 59 | NY | 19196 | 0.001073237 |
| 60 | NV | 37082 | 0.002073232 |
| 61 | DA | 51416 | 0.002874638 |
| 62 | DR | 42536 | 0.002378162 |
| 63 | DN | 28132 | 0.001572843 |
| 64 | DD | 44058 | 0.002463256 |
| 65 | DC | 18601 | 0.001039971 |
| 66 | DQ | 31301 | 0.001750020 |
| 67 | DE | 57752 | 0.003228880 |
| 68 | DG | 58057 | 0.003245932 |
| 69 | DH | 19891 | 0.001112094 |
| 70 | DI | 43039 | 0.002406285 |
| 71 | DL | 85344 | 0.004771532 |
| 72 | DK | 42016 | 0.002349089 |
| 73 | DM | 17505 | 0.000978694 |
| 74 | DF | 35757 | 0.001999152 |
| 75 | DP | 51689 | 0.002889901 |
| 76 | DS | 72735 | 0.004066570 |
| 77 | DT | 42963 | 0.002402036 |
| 78 | DW | 10880 | 0.000608294 |
| 79 | DY | 24136 | 0.001349429 |
| 80 | DV | 53062 | 0.002966664 |
| 81 | CA | 23394 | 0.001307945 |
| 82 | CR | 25154 | 0.001406345 |
| 83 | CN | 14598 | 0.000816165 |
| 84 | CD | 17769 | 0.000993454 |
| 85 | CC | 13528 | 0.000756342 |
| 86 | CQ | 20242 | 0.001131718 |
| 87 | CE | 23776 | 0.001329302 |
| 88 | CG | 36130 | 0.002020007 |
| 89 | CH | 12527 | 0.000700377 |
| 90 | CI | 16680 | 0.000932569 |
| 91 | CL | 39618 | 0.002215018 |
| 92 | CK | 21327 | 0.001192380 |
| 93 | CM | 6528  | 0.000364977 |
| 94 | CF | 15184 | 0.000848928 |

|     |    |        |             |
|-----|----|--------|-------------|
| 95  | CP | 27010  | 0.001510113 |
| 96  | CS | 37514  | 0.002097385 |
| 97  | CT | 19976  | 0.001116846 |
| 98  | CW | 5761   | 0.000322094 |
| 99  | CY | 10325  | 0.000577265 |
| 100 | CV | 23752  | 0.001327960 |
| 101 | QA | 64853  | 0.003625892 |
| 102 | QR | 55485  | 0.003102133 |
| 103 | QN | 31828  | 0.001779484 |
| 104 | QD | 40752  | 0.002278420 |
| 105 | QC | 17593  | 0.000983614 |
| 106 | QQ | 54172  | 0.003028724 |
| 107 | QE | 70352  | 0.003933338 |
| 108 | QG | 54616  | 0.003053548 |
| 109 | QH | 23961  | 0.001339645 |
| 110 | QI | 33717  | 0.001885097 |
| 111 | QL | 84009  | 0.004696893 |
| 112 | QK | 51215  | 0.002863400 |
| 113 | QM | 17328  | 0.000968798 |
| 114 | QF | 23347  | 0.001305317 |
| 115 | QP | 53172  | 0.002972815 |
| 116 | QS | 55321  | 0.003092964 |
| 117 | QT | 39905  | 0.002231065 |
| 118 | QW | 9829   | 0.000549534 |
| 119 | QY | 19061  | 0.001065689 |
| 120 | QV | 50335  | 0.002814200 |
| 121 | EA | 95182  | 0.005321568 |
| 122 | ER | 71967  | 0.004023632 |
| 123 | EN | 53947  | 0.003016145 |
| 124 | ED | 76689  | 0.004287636 |
| 125 | EC | 28440  | 0.001590063 |
| 126 | EQ | 54671  | 0.003056623 |
| 127 | EE | 139892 | 0.007821278 |
| 128 | EG | 76844  | 0.004296302 |
| 129 | EH | 26378  | 0.001474778 |
| 130 | EI | 53110  | 0.002969348 |
| 131 | EL | 111496 | 0.006233674 |
| 132 | EK | 95508  | 0.005339795 |
| 133 | EM | 27245  | 0.001523252 |
| 134 | EF | 34391  | 0.001922780 |
| 135 | EP | 59728  | 0.003339357 |
| 136 | ES | 76006  | 0.004249450 |
| 137 | ET | 60015  | 0.003355403 |
| 138 | EW | 12552  | 0.000701775 |
| 139 | EY | 26877  | 0.001502677 |
| 140 | EV | 73413  | 0.004104477 |
| 141 | GA | 90157  | 0.005040624 |
| 142 | GR | 74742  | 0.004178781 |
| 143 | GN | 41676  | 0.002330080 |
| 144 | GD | 56529  | 0.003160503 |
| 145 | GC | 25399  | 0.001420043 |
| 146 | GQ | 52353  | 0.002927025 |

|     |    |        |             |
|-----|----|--------|-------------|
| 147 | GE | 79357  | 0.004436802 |
| 148 | GG | 98839  | 0.005526029 |
| 149 | GH | 32079  | 0.001793518 |
| 150 | GI | 48317  | 0.002701374 |
| 151 | GL | 110989 | 0.006205328 |
| 152 | GK | 70387  | 0.003935295 |
| 153 | GM | 21281  | 0.001189808 |
| 154 | GF | 42785  | 0.002392084 |
| 155 | GP | 85896  | 0.004802394 |
| 156 | GS | 109231 | 0.006107040 |
| 157 | GT | 66284  | 0.003705899 |
| 158 | GW | 15573  | 0.000870677 |
| 159 | GY | 30059  | 0.001680581 |
| 160 | GV | 65792  | 0.003678391 |
| 161 | HA | 24731  | 0.001382695 |
| 162 | HR | 30419  | 0.001700708 |
| 163 | HN | 15039  | 0.000840821 |
| 164 | HD | 15519  | 0.000867658 |
| 165 | HC | 13471  | 0.000753156 |
| 166 | HQ | 25776  | 0.001441121 |
| 167 | HE | 23415  | 0.001309119 |
| 168 | HG | 29703  | 0.001660677 |
| 169 | HH | 17003  | 0.000950628 |
| 170 | HI | 21686  | 0.001212451 |
| 171 | HL | 53730  | 0.003004012 |
| 172 | HK | 23128  | 0.001293073 |
| 173 | HM | 9536   | 0.000533152 |
| 174 | HF | 19159  | 0.001071168 |
| 175 | HP | 31895  | 0.001783230 |
| 176 | HS | 42520  | 0.002377268 |
| 177 | HT | 30575  | 0.001709430 |
| 178 | HW | 6557   | 0.000366598 |
| 179 | HY | 13836  | 0.000773562 |
| 180 | HV | 26796  | 0.001498148 |
| 181 | IA | 44101  | 0.002465660 |
| 182 | IR | 40854  | 0.002284123 |
| 183 | IN | 30470  | 0.001703559 |
| 184 | ID | 32965  | 0.001843053 |
| 185 | IC | 19831  | 0.001108739 |
| 186 | IQ | 39117  | 0.002187008 |
| 187 | IE | 42725  | 0.002388729 |
| 188 | IG | 37352  | 0.002088328 |
| 189 | IH | 26494  | 0.001481264 |
| 190 | II | 40348  | 0.002255833 |
| 191 | IL | 78755  | 0.004403145 |
| 192 | IK | 43626  | 0.002439104 |
| 193 | IM | 15467  | 0.000864751 |
| 194 | IF | 32537  | 0.001819124 |
| 195 | IP | 45681  | 0.002553997 |
| 196 | IS | 63855  | 0.003570095 |
| 197 | IT | 44666  | 0.002497249 |
| 198 | IW | 9040   | 0.000505421 |

|     |    |        |             |
|-----|----|--------|-------------|
| 199 | IY | 24072  | 0.001345851 |
| 200 | IV | 42578  | 0.002380510 |
| 201 | LA | 124022 | 0.006933996 |
| 202 | LR | 109157 | 0.006102902 |
| 203 | LN | 59428  | 0.003322584 |
| 204 | LD | 81569  | 0.004560474 |
| 205 | LC | 40205  | 0.002247837 |
| 206 | LQ | 102974 | 0.005757215 |
| 207 | LE | 124896 | 0.006982861 |
| 208 | LG | 110942 | 0.006202701 |
| 209 | LH | 49392  | 0.002761477 |
| 210 | LI | 66334  | 0.003708694 |
| 211 | LL | 196321 | 0.010976190 |
| 212 | LK | 98253  | 0.005493266 |
| 213 | LM | 31111  | 0.001739397 |
| 214 | LF | 59003  | 0.003298822 |
| 215 | LP | 112491 | 0.006289304 |
| 216 | LS | 141489 | 0.007910565 |
| 217 | LT | 90747  | 0.005073610 |
| 218 | LW | 21376  | 0.001195119 |
| 219 | LY | 43237  | 0.002417355 |
| 220 | LV | 98606  | 0.005513002 |
| 221 | KA | 71962  | 0.004023352 |
| 222 | KR | 57748  | 0.003228656 |
| 223 | KN | 40094  | 0.002241632 |
| 224 | KD | 53167  | 0.002972535 |
| 225 | KC | 22285  | 0.001245941 |
| 226 | KQ | 44190  | 0.002470636 |
| 227 | KE | 87397  | 0.004886314 |
| 228 | KG | 58421  | 0.003266283 |
| 229 | KH | 24679  | 0.001379788 |
| 230 | KI | 47275  | 0.002643117 |
| 231 | KL | 86970  | 0.004862440 |
| 232 | KK | 80068  | 0.004476554 |
| 233 | KM | 22960  | 0.001283680 |
| 234 | KF | 29093  | 0.001626572 |
| 235 | KP | 57946  | 0.003239726 |
| 236 | KS | 67304  | 0.003762926 |
| 237 | KT | 53634  | 0.002998645 |
| 238 | KW | 10791  | 0.000603318 |
| 239 | KY | 26116  | 0.001460130 |
| 240 | KV | 59244  | 0.003312296 |
| 241 | MA | 35068  | 0.001960631 |
| 242 | MR | 18996  | 0.001062055 |
| 243 | MN | 15348  | 0.000858097 |
| 244 | MD | 21368  | 0.001194672 |
| 245 | MC | 7364   | 0.000411717 |
| 246 | MQ | 16270  | 0.000909646 |
| 247 | ME | 32156  | 0.001797823 |
| 248 | MG | 23712  | 0.001325724 |
| 249 | MH | 8276   | 0.000462706 |
| 250 | MI | 14166  | 0.000792013 |

|     |    |        |             |
|-----|----|--------|-------------|
| 251 | ML | 34575  | 0.001933067 |
| 252 | MK | 24845  | 0.001389069 |
| 253 | MM | 9059   | 0.000506483 |
| 254 | MF | 12332  | 0.000689475 |
| 255 | MP | 20010  | 0.001118747 |
| 256 | MS | 27841  | 0.001556574 |
| 257 | MT | 19751  | 0.001104267 |
| 258 | MW | 4509   | 0.000252095 |
| 259 | MY | 9975   | 0.000557696 |
| 260 | MV | 23894  | 0.001335899 |
| 261 | FA | 34061  | 0.001904330 |
| 262 | FR | 35660  | 0.001993729 |
| 263 | FN | 23095  | 0.001291228 |
| 264 | FD | 27657  | 0.001546286 |
| 265 | FC | 17057  | 0.000953647 |
| 266 | FQ | 32071  | 0.001793070 |
| 267 | FE | 33343  | 0.001864187 |
| 268 | FG | 38358  | 0.002144573 |
| 269 | FH | 18721  | 0.001046680 |
| 270 | FI | 31152  | 0.001741690 |
| 271 | FL | 71674  | 0.004007251 |
| 272 | FK | 30613  | 0.001711554 |
| 273 | FM | 11953  | 0.000668285 |
| 274 | FF | 27458  | 0.001535160 |
| 275 | FP | 37161  | 0.002077649 |
| 276 | FS | 61497  | 0.003438260 |
| 277 | FT | 35635  | 0.001992331 |
| 278 | FW | 9081   | 0.000507713 |
| 279 | FY | 20112  | 0.001124450 |
| 280 | FV | 36227  | 0.002025430 |
| 281 | PA | 97392  | 0.005445128 |
| 282 | PR | 69153  | 0.003866303 |
| 283 | PN | 31776  | 0.001776577 |
| 284 | PD | 49227  | 0.002752252 |
| 285 | PC | 22449  | 0.001255110 |
| 286 | PQ | 53714  | 0.003003117 |
| 287 | PE | 80747  | 0.004514516 |
| 288 | PG | 107570 | 0.006014174 |
| 289 | PH | 27610  | 0.001543659 |
| 290 | PI | 33408  | 0.001867821 |
| 291 | PL | 98395  | 0.005501206 |
| 292 | PK | 49355  | 0.002759408 |
| 293 | PM | 17051  | 0.000953311 |
| 294 | PF | 34853  | 0.001948610 |
| 295 | PP | 117339 | 0.006560353 |
| 296 | PS | 105989 | 0.005925782 |
| 297 | PT | 58084  | 0.003247441 |
| 298 | PW | 14096  | 0.000788099 |
| 299 | PY | 28715  | 0.001605438 |
| 300 | PV | 69088  | 0.003862669 |
| 301 | SA | 98026  | 0.005480575 |
| 302 | SR | 85459  | 0.004777961 |

|     |    |        |             |
|-----|----|--------|-------------|
| 303 | SN | 46276  | 0.002587263 |
| 304 | SD | 65251  | 0.003648144 |
| 305 | SC | 35332  | 0.001975391 |
| 306 | SQ | 69345  | 0.003877037 |
| 307 | SE | 91386  | 0.005109336 |
| 308 | SG | 103433 | 0.005782877 |
| 309 | SH | 39559  | 0.002211720 |
| 310 | SI | 55626  | 0.003110016 |
| 311 | SL | 146926 | 0.008214545 |
| 312 | SK | 69551  | 0.003888555 |
| 313 | SM | 25032  | 0.001399524 |
| 314 | SF | 54409  | 0.003041975 |
| 315 | SP | 111805 | 0.006250951 |
| 316 | SS | 168982 | 0.009447683 |
| 317 | ST | 81479  | 0.004555442 |
| 318 | SW | 21020  | 0.001175216 |
| 319 | SY | 35995  | 0.002012459 |
| 320 | SV | 85015  | 0.004753137 |
| 321 | TA | 69971  | 0.003912037 |
| 322 | TR | 45903  | 0.002566409 |
| 323 | TN | 29661  | 0.001658329 |
| 324 | TD | 41939  | 0.002344784 |
| 325 | TC | 24019  | 0.001342888 |
| 326 | TQ | 40944  | 0.002289155 |
| 327 | TE | 61339  | 0.003429427 |
| 328 | TG | 68168  | 0.003811232 |
| 329 | TH | 25496  | 0.001425466 |
| 330 | TI | 41059  | 0.002295584 |
| 331 | TL | 93598  | 0.005233008 |
| 332 | TK | 45589  | 0.002548854 |
| 333 | TM | 17848  | 0.000997871 |
| 334 | TF | 37218  | 0.002080836 |
| 335 | TP | 67374  | 0.003766840 |
| 336 | TS | 82572  | 0.004616551 |
| 337 | TT | 58778  | 0.003286243 |
| 338 | TW | 13013  | 0.000727549 |
| 339 | TY | 24874  | 0.001390690 |
| 340 | TV | 67307  | 0.003763094 |
| 341 | WA | 15885  | 0.000888121 |
| 342 | WR | 14757  | 0.000825055 |
| 343 | WN | 9829   | 0.000549534 |
| 344 | WD | 11462  | 0.000640834 |
| 345 | WC | 4530   | 0.000253270 |
| 346 | WQ | 9801   | 0.000547968 |
| 347 | WE | 15208  | 0.000850270 |
| 348 | WG | 14803  | 0.000827627 |
| 349 | WH | 5556   | 0.000310633 |
| 350 | WI | 9484   | 0.000530245 |
| 351 | WL | 22543  | 0.001260366 |
| 352 | WK | 14662  | 0.000819744 |
| 353 | WM | 5215   | 0.000291568 |
| 354 | WF | 7886   | 0.000440902 |

|     |    |        |             |
|-----|----|--------|-------------|
| 355 | WP | 10981  | 0.000613941 |
| 356 | WS | 16313  | 0.000912050 |
| 357 | WT | 12166  | 0.000680194 |
| 358 | WW | 3681   | 0.000205802 |
| 359 | WY | 5898   | 0.000329754 |
| 360 | WV | 13129  | 0.000734035 |
| 361 | YA | 23605  | 0.001319741 |
| 362 | YR | 28036  | 0.001567476 |
| 363 | YN | 18280  | 0.001022024 |
| 364 | YD | 20994  | 0.001173762 |
| 365 | YC | 11501  | 0.000643014 |
| 366 | YQ | 21649  | 0.001210383 |
| 367 | YE | 29026  | 0.001622826 |
| 368 | YG | 28535  | 0.001595375 |
| 369 | YH | 12893  | 0.000720840 |
| 370 | YI | 24182  | 0.001352001 |
| 371 | YL | 45601  | 0.002549525 |
| 372 | YK | 26242  | 0.001467175 |
| 373 | YM | 9426   | 0.000527002 |
| 374 | YF | 20808  | 0.001163363 |
| 375 | YP | 22942  | 0.001282673 |
| 376 | YS | 37560  | 0.002099957 |
| 377 | YT | 25585  | 0.001430442 |
| 378 | YW | 6354   | 0.000355248 |
| 379 | YY | 15582  | 0.000871180 |
| 380 | YV | 27120  | 0.001516263 |
| 381 | VA | 78053  | 0.004363896 |
| 382 | VR | 54656  | 0.003055784 |
| 383 | VN | 38053  | 0.002127521 |
| 384 | VD | 50102  | 0.002801173 |
| 385 | VC | 26274  | 0.001468964 |
| 386 | VQ | 48318  | 0.002701430 |
| 387 | VE | 66960  | 0.003743693 |
| 388 | VG | 63059  | 0.003525591 |
| 389 | VH | 28950  | 0.001618577 |
| 390 | VI | 49794  | 0.002783953 |
| 391 | VL | 110675 | 0.006187773 |
| 392 | VK | 56665  | 0.003168106 |
| 393 | VM | 20761  | 0.001160735 |
| 394 | VF | 41838  | 0.002339137 |
| 395 | VP | 66789  | 0.003734133 |
| 396 | VS | 86550  | 0.004838958 |
| 397 | VT | 67009  | 0.003746433 |
| 398 | VW | 12923  | 0.000722517 |
| 399 | VY | 28072  | 0.001569489 |
| 400 | VV | 70793  | 0.003957994 |

---

Output from the Cube program (Macintosh computers only) available upon request  
jalat@dsvidf.cea.fr



Triad\_DataB > \* \* \* \* Genomic Database Analysis \* \* \* \*

Triad\_DataB> Analysis of human database  
Database used ::: Hsapa2.gbk  
Sliding frame = 19

Min-Mina 43 5158  
Max-Maxa 26267 6316  
Max-Tot 17886079

Total of fractions 0.9999996000  
Max-fraction 0.0014685721 SSS  
Min-fraction 0.0000024041 MWW Ratio 610.86

Total-of-dimers-fractions 1.000  
Max-dimer-fraction 0.0109761900 LL  
Min-dimer-fraction 0.0002058025 WW Ratio 53.33

Overall number of entries 37391  
Minimal length of protein 25 NP\_0010303  
Maximal length of protein 33423 NP\_596869  
Number of AA residues 17863015  
Total number of lines 3993454  
Sliding frame (AA) 19  
Signal\_peptides 2177  
Transit\_peptides 205  
Mature\_proteins 2699  
Database contains::: 37609

General statistics of the database

|         |         |          |           |         |
|---------|---------|----------|-----------|---------|
| >10000  | 10K-20K | 20K-30K  | 30K-40K   | 40K-50K |
| 2249    | 7169    | 5478     | 4953      | 3906    |
| 50K-60K | 60K-70K | 70K-100K | 100K-150K | > 150K  |
| 3337    | 2278    | 4026     | 2561      | 1652    |
| < 3pI   | 3-4pI   | 4-5pI    | 5-6pI     | 6-7pI   |
| 9       | 191     | 3580     | 6908      | 5919    |
| 7-8pI   | 8-9pI   | 9-10pI   | 10-11pI   | >pI 11  |
| 4730    | 5729    | 4848     | 2711      | 2984    |

Distribution of hydrophobicity indexes

|        |        |        |        |         |
|--------|--------|--------|--------|---------|
| 0-10%  | 10-20% | 20-30% | 30-40% | 40-50%  |
| 5447   | 8163   | 9361   | 6873   | 3583    |
| 50-60% | 60-70% | 70-80% | 80-90% | 90-100% |
| 1902   | 1167   | 687    | 408    | 18      |

Total of masses 37609 Total of pIs 37609 Total of HIs37609

|         |         |        |        |         |         |         |         |        |         |
|---------|---------|--------|--------|---------|---------|---------|---------|--------|---------|
| A       | R       | N      | D      | C       | Q       | E       | G       | H      | I       |
| 1280167 | 1047713 | 624395 | 831947 | 410844  | 851028  | 1254946 | 1214190 | 474957 | 754842  |
| 7.0834  | 5.7972  | 3.4549 | 4.6033 | 2.2733  | 4.7089  | 6.9438  | 6.7183  | 2.6280 | 4.1767  |
| L       | K       | M      | F      | P       | S       | T       | W       | Y      | V       |
| 1751498 | 1003711 | 377131 | 632056 | 1164098 | 1489662 | 956200  | 222862  | 456476 | 1064292 |
| 9.6914  | 5.5537  | 2.0867 | 3.4973 | 6.4412  | 8.2426  | 5.2908  | 1.2331  | 2.5258 | 5.8889  |

Group No. 1 5447

A R N D C Q E G H I

|        |        |        |        |        |        |        |        |        |        |
|--------|--------|--------|--------|--------|--------|--------|--------|--------|--------|
| 6.8834 | 8.1570 | 3.2521 | 4.4068 | 2.2980 | 5.4456 | 8.4882 | 7.5969 | 3.0314 | 2.8693 |
| L      | K      | M      | F      | P      | S      | T      | W      | Y      | V      |
| 7.1972 | 7.3086 | 2.1266 | 2.6406 | 7.3845 | 8.6482 | 4.9037 | 1.1832 | 2.1704 | 4.0059 |

Group No. 2 8163

|        |        |        |        |        |        |        |        |        |        |
|--------|--------|--------|--------|--------|--------|--------|--------|--------|--------|
| A      | R      | N      | D      | C      | Q      | E      | G      | H      | I      |
| 7.3602 | 7.0048 | 3.3396 | 4.6091 | 2.2937 | 4.9630 | 7.3474 | 7.3460 | 2.6600 | 3.4648 |
| L      | K      | M      | F      | P      | S      | T      | W      | Y      | V      |
| 8.6448 | 5.9908 | 2.1360 | 3.0251 | 7.4244 | 8.5216 | 5.1512 | 1.3134 | 2.3098 | 5.0899 |

Group No. 3 9361

|        |        |        |        |        |        |        |        |        |        |
|--------|--------|--------|--------|--------|--------|--------|--------|--------|--------|
| A      | R      | N      | D      | C      | Q      | E      | G      | H      | I      |
| 7.4939 | 6.3389 | 3.3572 | 4.5887 | 2.4570 | 4.7046 | 6.5969 | 7.2047 | 2.7122 | 3.9519 |
| L      | K      | M      | F      | P      | S      | T      | W      | Y      | V      |
| 9.6615 | 5.3544 | 2.1638 | 3.4603 | 6.8262 | 8.1453 | 5.1793 | 1.4009 | 2.5145 | 5.8838 |

Group No. 4 6873

|         |        |        |        |        |        |        |        |        |        |
|---------|--------|--------|--------|--------|--------|--------|--------|--------|--------|
| A       | R      | N      | D      | C      | Q      | E      | G      | H      | I      |
| 7.6699  | 5.8612 | 3.2269 | 4.4372 | 2.5617 | 4.3483 | 5.9945 | 7.1335 | 2.6469 | 4.3202 |
| L       | K      | M      | F      | P      | S      | T      | W      | Y      | V      |
| 10.6919 | 4.8524 | 2.2515 | 3.8082 | 6.5350 | 7.9115 | 5.2176 | 1.4822 | 2.5433 | 6.4997 |

Group No. 5 3583

|         |        |        |        |        |        |        |        |        |        |
|---------|--------|--------|--------|--------|--------|--------|--------|--------|--------|
| A       | R      | N      | D      | C      | Q      | E      | G      | H      | I      |
| 8.1041  | 5.4784 | 3.0777 | 4.0279 | 2.7311 | 4.1392 | 5.4382 | 7.1757 | 2.6810 | 4.5914 |
| L       | K      | M      | F      | P      | S      | T      | W      | Y      | V      |
| 11.6340 | 4.3736 | 2.3755 | 4.1230 | 6.1164 | 7.7150 | 5.2212 | 1.4888 | 2.4928 | 7.0130 |

Group No. 6 1902

|         |        |        |        |        |        |        |        |        |        |
|---------|--------|--------|--------|--------|--------|--------|--------|--------|--------|
| A       | R      | N      | D      | C      | Q      | E      | G      | H      | I      |
| 8.0821  | 5.0063 | 2.8840 | 3.5544 | 3.2088 | 3.8706 | 4.6653 | 7.3119 | 2.5669 | 5.0234 |
| L       | K      | M      | F      | P      | S      | T      | W      | Y      | V      |
| 12.4951 | 3.8275 | 2.4221 | 4.5063 | 5.6590 | 7.8444 | 5.2135 | 1.6530 | 2.6082 | 7.5961 |

Group No. 7 1167

|         |        |        |        |        |        |        |        |        |        |
|---------|--------|--------|--------|--------|--------|--------|--------|--------|--------|
| A       | R      | N      | D      | C      | Q      | E      | G      | H      | I      |
| 8.4323  | 4.3775 | 2.6923 | 2.8977 | 3.6033 | 3.3776 | 3.5713 | 7.0780 | 2.3699 | 5.7687 |
| L       | K      | M      | F      | P      | S      | T      | W      | Y      | V      |
| 13.0783 | 3.2668 | 2.6735 | 5.3929 | 5.1988 | 7.9471 | 5.4512 | 1.7850 | 3.1889 | 7.8475 |

Group No. 8 687

|         |        |        |        |        |        |        |        |        |        |
|---------|--------|--------|--------|--------|--------|--------|--------|--------|--------|
| A       | R      | N      | D      | C      | Q      | E      | G      | H      | I      |
| 8.3070  | 3.5742 | 2.6849 | 2.3856 | 3.0728 | 2.6929 | 2.9723 | 6.6437 | 2.4361 | 6.5581 |
| L       | K      | M      | F      | P      | S      | T      | W      | Y      | V      |
| 14.0662 | 2.9777 | 3.2474 | 6.1777 | 4.8981 | 7.8242 | 5.6591 | 1.6626 | 3.7258 | 8.4283 |

Group No. 9 408

|         |        |        |        |        |        |        |        |        |        |
|---------|--------|--------|--------|--------|--------|--------|--------|--------|--------|
| A       | R      | N      | D      | C      | Q      | E      | G      | H      | I      |
| 7.4816  | 3.1211 | 2.6586 | 2.2519 | 3.4719 | 2.3927 | 2.3137 | 5.7227 | 2.8160 | 7.9777 |
| L       | K      | M      | F      | P      | S      | T      | W      | Y      | V      |
| 14.1920 | 2.8001 | 3.5267 | 6.3269 | 4.5781 | 7.9442 | 6.0652 | 0.9667 | 4.2971 | 9.0869 |

Group No. 10 18

|   |   |   |   |   |   |   |   |   |   |
|---|---|---|---|---|---|---|---|---|---|
| A | R | N | D | C | Q | E | G | H | I |
|---|---|---|---|---|---|---|---|---|---|

|         |        |        |        |        |        |        |        |        |         |
|---------|--------|--------|--------|--------|--------|--------|--------|--------|---------|
| 7.9176  | 1.3882 | 1.0552 | 3.0372 | 4.2554 | 0.8711 | 4.8239 | 3.2153 | 3.7439 | 10.0689 |
| L       | K      | M      | F      | P      | S      | T      | W      | Y      | V       |
| 13.1135 | 1.6532 | 3.3890 | 2.5609 | 4.9687 | 5.3866 | 4.9072 | 0.5040 | 8.6948 | 14.4217 |

```

TAAr.f>      37391 Entries
              37391 Codes
              37391 Sequences
3711693 Info lines
3993454 Total

```

Distribution of pIs vs. mass

|          | 0. | 3. | 4.  | 5.  | 6.  | 7.  | 8.   | 9.   | 10. | 11.  | 14. |
|----------|----|----|-----|-----|-----|-----|------|------|-----|------|-----|
| 0- 10    | 1  | 57 | 244 | 178 | 133 | 270 | 266  | 270  | 358 | 472  |     |
| 10- 20   | 0  | 75 | 727 | 809 | 582 | 722 | 891  | 1054 | 985 | 1324 |     |
| 20- 30   | 0  | 25 | 579 | 840 | 692 | 611 | 784  | 750  | 550 | 647  |     |
| 30- 40   | 0  | 11 | 419 | 784 | 638 | 678 | 1025 | 764  | 330 | 304  |     |
| 40- 50   | 5  | 3  | 372 | 740 | 636 | 496 | 740  | 588  | 196 | 130  |     |
| 50- 60   | 1  | 2  | 266 | 705 | 659 | 522 | 595  | 441  | 103 | 43   |     |
| 60- 70   | 0  | 0  | 170 | 462 | 465 | 329 | 436  | 333  | 62  | 21   |     |
| 70- 100  | 1  | 0  | 453 | 974 | 928 | 594 | 577  | 392  | 77  | 30   |     |
| 100- 150 | 0  | 6  | 209 | 785 | 710 | 322 | 285  | 197  | 39  | 8    |     |
| 150- 0   | 0  | 0  | 0   | 0   | 0   | 0   | 0    | 0    | 0   | 0    |     |

Distribution of HI vs. mass

|          | 0.   | 10.  | 20.  | 30.  | 40. | 50. | 60. | 70. | 80. | 90. | 100. |
|----------|------|------|------|------|-----|-----|-----|-----|-----|-----|------|
| 0- 10    | 815  | 347  | 324  | 326  | 201 | 120 | 82  | 28  | 6   | 0   |      |
| 10- 20   | 1423 | 1665 | 1566 | 1085 | 632 | 384 | 241 | 127 | 46  | 0   |      |
| 20- 30   | 739  | 1238 | 1353 | 979  | 533 | 304 | 197 | 83  | 48  | 4   |      |
| 30- 40   | 460  | 953  | 1136 | 918  | 445 | 302 | 203 | 254 | 275 | 7   |      |
| 40- 50   | 406  | 746  | 1042 | 795  | 405 | 232 | 186 | 73  | 16  | 5   |      |
| 50- 60   | 333  | 658  | 939  | 646  | 379 | 172 | 102 | 94  | 13  | 1   |      |
| 60- 70   | 336  | 473  | 625  | 443  | 230 | 75  | 70  | 25  | 1   | 0   |      |
| 70- 100  | 514  | 888  | 1224 | 816  | 342 | 165 | 71  | 3   | 2   | 1   |      |
| 100- 150 | 254  | 678  | 742  | 528  | 251 | 96  | 12  | 0   | 0   | 0   |      |
| 150- 0   | 0    | 0    | 0    | 0    | 0   | 0   | 0   | 0   | 0   | 0   |      |

-> Triad\_DataB.f: ((( Job finished )))
