# Supplementary material
Source: PubMed Central journal article supplement (PMC11115621)
Supplement: 18_2010_437_MOESM8_ESM.pdf [file 18_2010_437_MOESM8_ESM.pdf]

**Table Ts2.** Different trimers in the human genomic database (see also Table Ts1).

Analysis of human genomic database with the Cube.f program (AG)

| # Triad | Total | Fraction     | Bulkiness/3 | N-Bulk | Hydro/3 |
|---------|-------|--------------|-------------|--------|---------|
| 1 AAA   | 22220 | 0.0012423070 | 90.00       | 0.394  | 1.800   |
| 2 AAR   | 7997  | 0.0004471075 | 124.67      | 0.546  | -0.300  |
| 3 AAN   | 2700  | 0.0001509554 | 101.57      | 0.445  | 0.033   |
| 4 AAD   | 4153  | 0.0002321917 | 99.10       | 0.434  | 0.033   |
| 5 AAC   | 2482  | 0.0001387671 | 94.43       | 0.414  | 2.033   |
| 6 AAQ   | 5957  | 0.0003330523 | 109.80      | 0.481  | 0.033   |
| 7 AAE   | 7668  | 0.0004287133 | 107.40      | 0.471  | 0.033   |
| 8 AAG   | 11220 | 0.0006273035 | 81.63       | 0.358  | 1.067   |
| 9 AAH   | 2918  | 0.0001631436 | 113.33      | 0.497  | 0.133   |
| 10 AAI  | 3942  | 0.0002203949 | 114.63      | 0.502  | 2.700   |
| 11 AAL  | 12636 | 0.0007064712 | 114.67      | 0.502  | 2.467   |
| 12 AAK  | 4994  | 0.0002792116 | 115.77      | 0.507  | -0.100  |
| 13 AAM  | 2312  | 0.0001292625 | 115.67      | 0.507  | 1.833   |
| 14 AAF  | 3978  | 0.0002224076 | 123.97      | 0.543  | 2.133   |
| 15 AAP  | 9271  | 0.0005183360 | 100.97      | 0.442  | 0.667   |
| 16 AAS  | 10556 | 0.0005901796 | 91.80       | 0.402  | 0.933   |
| 17 AAT  | 6313  | 0.0003529560 | 100.50      | 0.440  | 0.967   |
| 18 AAW  | 1470  | 0.0000821868 | 136.07      | 0.596  | 0.900   |
| 19 AAY  | 2397  | 0.0001340148 | 125.67      | 0.551  | 0.767   |
| 20 AAV  | 8929  | 0.0004992150 | 106.33      | 0.466  | 2.600   |
| 21 ARA  | 7057  | 0.0003945526 | 124.67      | 0.546  | -0.300  |
| 22 ARR  | 6467  | 0.0003615661 | 159.33      | 0.698  | -2.400  |
| 23 ARN  | 2217  | 0.0001239511 | 136.23      | 0.597  | -2.067  |
| 24 ARD  | 3321  | 0.0001856751 | 133.77      | 0.586  | -2.067  |
| 25 ARC  | 1469  | 0.0000821309 | 129.10      | 0.566  | -0.067  |
| 26 ARQ  | 3187  | 0.0001781833 | 144.47      | 0.633  | -2.067  |
| 27 ARE  | 4827  | 0.0002698747 | 142.07      | 0.623  | -2.067  |
| 28 ARG  | 5973  | 0.0003339468 | 116.30      | 0.510  | -1.033  |
| 29 ARH  | 1888  | 0.0001055569 | 148.00      | 0.649  | -1.967  |
| 30 ARI  | 2534  | 0.0001416744 | 149.30      | 0.654  | 0.600   |
| 31 ARL  | 7118  | 0.0003979631 | 149.33      | 0.654  | 0.367   |
| 32 ARK  | 3722  | 0.0002080948 | 150.43      | 0.659  | -2.200  |
| 33 ARM  | 1279  | 0.0000715081 | 150.33      | 0.659  | -0.267  |
| 34 ARF  | 2004  | 0.0001120424 | 158.63      | 0.695  | 0.033   |
| 35 ARP  | 4912  | 0.0002746270 | 135.63      | 0.594  | -1.433  |
| 36 ARS  | 4930  | 0.0002756334 | 126.47      | 0.554  | -1.167  |
| 37 ART  | 3431  | 0.0001918252 | 135.17      | 0.592  | -1.133  |
| 38 ARW  | 926   | 0.0000517721 | 170.73      | 0.748  | -1.200  |
| 39 ARY  | 1534  | 0.0000857650 | 160.33      | 0.703  | -1.333  |
| 40 ARV  | 4096  | 0.0002290049 | 141.00      | 0.618  | 0.500   |
| 41 ANA  | 2238  | 0.0001251252 | 101.57      | 0.445  | 0.033   |
| 42 ANR  | 1785  | 0.0000997983 | 136.23      | 0.597  | -2.067  |
| 43 ANN  | 1342  | 0.0000750304 | 113.13      | 0.496  | -1.733  |
| 44 AND  | 1353  | 0.0000756454 | 110.67      | 0.485  | -1.733  |
| 45 ANC  | 743   | 0.0000415407 | 106.00      | 0.465  | 0.267   |
| 46 ANQ  | 1498  | 0.0000837523 | 121.37      | 0.532  | -1.733  |

|    |     |      |              |        |       |        |
|----|-----|------|--------------|--------|-------|--------|
| 47 | ANE | 2212 | 0.0001236716 | 118.97 | 0.521 | -1.733 |
| 48 | ANG | 2692 | 0.0001505081 | 93.20  | 0.408 | -0.700 |
| 49 | ANH | 954  | 0.0000533376 | 124.90 | 0.547 | -1.633 |
| 50 | ANI | 1938 | 0.0001083524 | 126.20 | 0.553 | 0.933  |
| 51 | ANL | 3488 | 0.0001950120 | 126.23 | 0.553 | 0.700  |
| 52 | ANK | 1832 | 0.0001024260 | 127.33 | 0.558 | -1.867 |
| 53 | ANM | 842  | 0.0000470757 | 127.23 | 0.558 | 0.067  |
| 54 | ANF | 1271 | 0.0000710608 | 135.53 | 0.594 | 0.367  |
| 55 | ANP | 2081 | 0.0001163475 | 112.53 | 0.493 | -1.100 |
| 56 | ANS | 2889 | 0.0001615223 | 103.37 | 0.453 | -0.833 |
| 57 | ANT | 1781 | 0.0000995746 | 112.07 | 0.491 | -0.800 |
| 58 | ANW | 320  | 0.0000178910 | 147.63 | 0.647 | -0.867 |
| 59 | ANY | 981  | 0.0000548471 | 137.23 | 0.601 | -1.000 |
| 60 | ANV | 2357 | 0.0001317785 | 117.90 | 0.517 | 0.833  |
| 61 | ADA | 3569 | 0.0001995406 | 99.10  | 0.434 | 0.033  |
| 62 | ADR | 2686 | 0.0001501727 | 133.77 | 0.586 | -2.067 |
| 63 | ADN | 1371 | 0.0000766518 | 110.67 | 0.485 | -1.733 |
| 64 | ADD | 2416 | 0.0001350771 | 108.20 | 0.474 | -1.733 |
| 65 | ADC | 1143 | 0.0000639044 | 103.53 | 0.454 | 0.267  |
| 66 | ADQ | 1816 | 0.0001015315 | 118.90 | 0.521 | -1.733 |
| 67 | ADE | 3106 | 0.0001736546 | 116.50 | 0.511 | -1.733 |
| 68 | ADG | 4256 | 0.0002379504 | 90.73  | 0.398 | -0.700 |
| 69 | ADH | 1130 | 0.0000631776 | 122.43 | 0.537 | -1.633 |
| 70 | ADI | 2889 | 0.0001615223 | 123.73 | 0.542 | 0.933  |
| 71 | ADL | 5451 | 0.0003047621 | 123.77 | 0.542 | 0.700  |
| 72 | ADK | 2361 | 0.0001320021 | 124.87 | 0.547 | -1.867 |
| 73 | ADM | 1081 | 0.0000604381 | 124.77 | 0.547 | 0.067  |
| 74 | ADF | 2286 | 0.0001278089 | 133.07 | 0.583 | 0.367  |
| 75 | ADP | 3100 | 0.0001733191 | 110.07 | 0.482 | -1.100 |
| 76 | ADS | 4509 | 0.0002520955 | 100.90 | 0.442 | -0.833 |
| 77 | ADT | 2693 | 0.0001505640 | 109.60 | 0.480 | -0.800 |
| 78 | ADW | 569  | 0.0000318124 | 145.17 | 0.636 | -0.867 |
| 79 | ADY | 1237 | 0.0000691599 | 134.77 | 0.591 | -1.000 |
| 80 | ADV | 3359 | 0.0001877997 | 115.43 | 0.506 | 0.833  |
| 81 | ACA | 2087 | 0.0001166829 | 94.43  | 0.414 | 2.033  |
| 82 | ACR | 1667 | 0.0000932010 | 129.10 | 0.566 | -0.067 |
| 83 | ACN | 684  | 0.0000382420 | 106.00 | 0.465 | 0.267  |
| 84 | ACD | 1146 | 0.0000640722 | 103.53 | 0.454 | 0.267  |
| 85 | ACC | 830  | 0.0000464048 | 98.87  | 0.433 | 2.267  |
| 86 | ACQ | 1235 | 0.0000690481 | 114.23 | 0.501 | 0.267  |
| 87 | ACE | 1395 | 0.0000779936 | 111.83 | 0.490 | 0.267  |
| 88 | ACG | 2227 | 0.0001245102 | 86.07  | 0.377 | 1.300  |
| 89 | ACH | 695  | 0.0000388570 | 117.77 | 0.516 | 0.367  |
| 90 | ACI | 1016 | 0.0000568040 | 119.07 | 0.522 | 2.933  |
| 91 | ACL | 2480 | 0.0001386553 | 119.10 | 0.522 | 2.700  |
| 92 | ACK | 1180 | 0.0000659731 | 120.20 | 0.527 | 0.133  |
| 93 | ACM | 474  | 0.0000265011 | 120.10 | 0.526 | 2.067  |
| 94 | ACF | 951  | 0.0000531698 | 128.40 | 0.563 | 2.367  |
| 95 | ACP | 1649 | 0.0000921946 | 105.40 | 0.462 | 0.900  |
| 96 | ACS | 2345 | 0.0001311075 | 96.23  | 0.422 | 1.167  |
| 97 | ACT | 1320 | 0.0000738004 | 104.93 | 0.460 | 1.200  |
| 98 | ACW | 369  | 0.0000206306 | 140.50 | 0.616 | 1.133  |

|     |     |      |              |        |       |        |
|-----|-----|------|--------------|--------|-------|--------|
| 99  | ACY | 648  | 0.0000362293 | 130.10 | 0.570 | 1.000  |
| 100 | ACV | 1567 | 0.0000876100 | 110.77 | 0.485 | 2.833  |
| 101 | AQA | 5848 | 0.0003269582 | 109.80 | 0.481 | 0.033  |
| 102 | AQR | 4152 | 0.0002321358 | 144.47 | 0.633 | -2.067 |
| 103 | AQN | 1962 | 0.0001096942 | 121.37 | 0.532 | -1.733 |
| 104 | AQD | 2710 | 0.0001515145 | 118.90 | 0.521 | -1.733 |
| 105 | AQC | 1030 | 0.0000575867 | 114.23 | 0.501 | 0.267  |
| 106 | AQQ | 3430 | 0.0001917692 | 129.60 | 0.568 | -1.733 |
| 107 | AQE | 4535 | 0.0002535491 | 127.20 | 0.557 | -1.733 |
| 108 | AQG | 4487 | 0.0002508655 | 101.43 | 0.444 | -0.700 |
| 109 | AQH | 1617 | 0.0000904055 | 133.13 | 0.583 | -1.633 |
| 110 | AQI | 2298 | 0.0001284798 | 134.43 | 0.589 | 0.933  |
| 111 | AQL | 6095 | 0.0003407678 | 134.47 | 0.589 | 0.700  |
| 112 | AQK | 3270 | 0.0001828237 | 135.57 | 0.594 | -1.867 |
| 113 | AQM | 1222 | 0.0000683213 | 135.47 | 0.594 | 0.067  |
| 114 | AQF | 1430 | 0.0000799504 | 143.77 | 0.630 | 0.367  |
| 115 | AQP | 4034 | 0.0002255385 | 120.77 | 0.529 | -1.100 |
| 116 | AQS | 3761 | 0.0002102752 | 111.60 | 0.489 | -0.833 |
| 117 | AQT | 2697 | 0.0001507877 | 120.30 | 0.527 | -0.800 |
| 118 | AQW | 616  | 0.0000344402 | 155.87 | 0.683 | -0.867 |
| 119 | AQY | 1246 | 0.0000696631 | 145.47 | 0.637 | -1.000 |
| 120 | AQV | 3692 | 0.0002064175 | 126.13 | 0.553 | 0.833  |
| 121 | AEA | 8151 | 0.0004557175 | 107.40 | 0.471 | 0.033  |
| 122 | AER | 5477 | 0.0003062158 | 142.07 | 0.623 | -2.067 |
| 123 | AEN | 3528 | 0.0001972484 | 118.97 | 0.521 | -1.733 |
| 124 | AED | 4653 | 0.0002601465 | 116.50 | 0.511 | -1.733 |
| 125 | AEC | 1374 | 0.0000768195 | 111.83 | 0.490 | 0.267  |
| 126 | AEQ | 3737 | 0.0002089334 | 127.20 | 0.557 | -1.733 |
| 127 | AEE | 8633 | 0.0004826658 | 124.80 | 0.547 | -1.733 |
| 128 | AEG | 5988 | 0.0003347855 | 99.03  | 0.434 | -0.700 |
| 129 | AEH | 1686 | 0.0000942632 | 130.73 | 0.573 | -1.633 |
| 130 | AEI | 3624 | 0.0002026157 | 132.03 | 0.579 | 0.933  |
| 131 | AEL | 8419 | 0.0004707012 | 132.07 | 0.579 | 0.700  |
| 132 | AEK | 5586 | 0.0003123099 | 133.17 | 0.584 | -1.867 |
| 133 | AEM | 1973 | 0.0001103092 | 133.07 | 0.583 | 0.067  |
| 134 | AEF | 2200 | 0.0001230007 | 141.37 | 0.619 | 0.367  |
| 135 | AEP | 4531 | 0.0002533255 | 118.37 | 0.519 | -1.100 |
| 136 | AES | 5024 | 0.0002808888 | 109.20 | 0.479 | -0.833 |
| 137 | AET | 3736 | 0.0002088775 | 117.90 | 0.517 | -0.800 |
| 138 | AEW | 732  | 0.0000409257 | 153.47 | 0.673 | -0.867 |
| 139 | AEY | 1777 | 0.0000993510 | 143.07 | 0.627 | -1.000 |
| 140 | AEV | 5297 | 0.0002961521 | 123.73 | 0.542 | 0.833  |
| 141 | AGA | 9521 | 0.0005323134 | 81.63  | 0.358 | 1.067  |
| 142 | AGR | 5818 | 0.0003252809 | 116.30 | 0.510 | -1.033 |
| 143 | AGN | 2634 | 0.0001472654 | 93.20  | 0.408 | -0.700 |
| 144 | AGD | 3931 | 0.0002197798 | 90.73  | 0.398 | -0.700 |
| 145 | AGC | 1847 | 0.0001032647 | 86.07  | 0.377 | 1.300  |
| 146 | AGQ | 3893 | 0.0002176553 | 101.43 | 0.444 | -0.700 |
| 147 | AGE | 5675 | 0.0003172859 | 99.03  | 0.434 | -0.700 |
| 148 | AGG | 9073 | 0.0005072660 | 73.27  | 0.321 | 0.333  |
| 149 | AGH | 2151 | 0.0001202611 | 104.97 | 0.460 | -0.600 |
| 150 | AGI | 3556 | 0.0001988138 | 106.27 | 0.466 | 1.967  |

|     |     |       |              |        |       |        |
|-----|-----|-------|--------------|--------|-------|--------|
| 151 | AGL | 8865  | 0.0004956368 | 106.30 | 0.466 | 1.733  |
| 152 | AGK | 4097  | 0.0002290608 | 107.40 | 0.471 | -0.833 |
| 153 | AGM | 1628  | 0.0000910205 | 107.30 | 0.470 | 1.100  |
| 154 | AGF | 2790  | 0.0001559872 | 115.60 | 0.507 | 1.400  |
| 155 | AGP | 7443  | 0.0004161337 | 92.60  | 0.406 | -0.067 |
| 156 | AGS | 8399  | 0.0004695831 | 83.43  | 0.366 | 0.200  |
| 157 | AGT | 5009  | 0.0002800502 | 92.13  | 0.404 | 0.233  |
| 158 | AGW | 1181  | 0.0000660290 | 127.70 | 0.560 | 0.167  |
| 159 | AGY | 1860  | 0.0001039915 | 117.30 | 0.514 | 0.033  |
| 160 | AGV | 5723  | 0.0003199695 | 97.97  | 0.429 | 1.867  |
| 161 | AHA | 2025  | 0.0001132165 | 113.33 | 0.497 | 0.133  |
| 162 | AHR | 1996  | 0.0001115952 | 148.00 | 0.649 | -1.967 |
| 163 | AHN | 857   | 0.0000479144 | 124.90 | 0.547 | -1.633 |
| 164 | AHD | 824   | 0.0000460693 | 122.43 | 0.537 | -1.633 |
| 165 | AHC | 859   | 0.0000480262 | 117.77 | 0.516 | 0.367  |
| 166 | AHQ | 1623  | 0.0000907410 | 133.13 | 0.583 | -1.633 |
| 167 | AHE | 1491  | 0.0000833609 | 130.73 | 0.573 | -1.633 |
| 168 | AHG | 2151  | 0.0001202611 | 104.97 | 0.460 | -0.600 |
| 169 | AHH | 890   | 0.0000497594 | 136.67 | 0.599 | -1.533 |
| 170 | AHI | 1161  | 0.0000649108 | 137.97 | 0.605 | 1.033  |
| 171 | AHL | 3581  | 0.0002002116 | 138.00 | 0.605 | 0.800  |
| 172 | AHK | 1361  | 0.0000760927 | 139.10 | 0.610 | -1.767 |
| 173 | AHM | 494   | 0.0000276192 | 139.00 | 0.609 | 0.167  |
| 174 | AHF | 1202  | 0.0000672031 | 147.30 | 0.645 | 0.467  |
| 175 | AHP | 2097  | 0.0001172420 | 124.30 | 0.545 | -1.000 |
| 176 | AHS | 2636  | 0.0001473772 | 115.13 | 0.505 | -0.733 |
| 177 | AHT | 1629  | 0.0000910764 | 123.83 | 0.543 | -0.700 |
| 178 | AHW | 417   | 0.0000233142 | 159.40 | 0.699 | -0.767 |
| 179 | AHY | 759   | 0.0000424352 | 149.00 | 0.653 | -0.900 |
| 180 | AHV | 1698  | 0.0000949342 | 129.67 | 0.568 | 0.933  |
| 181 | AIA | 3624  | 0.0002026157 | 114.63 | 0.502 | 2.700  |
| 182 | AIR | 2676  | 0.0001496136 | 149.30 | 0.654 | 0.600  |
| 183 | AIN | 1874  | 0.0001047742 | 126.20 | 0.553 | 0.933  |
| 184 | AID | 1968  | 0.0001100297 | 123.73 | 0.542 | 0.933  |
| 185 | AIC | 1527  | 0.0000853737 | 119.07 | 0.522 | 2.933  |
| 186 | AIQ | 2437  | 0.0001362512 | 134.43 | 0.589 | 0.933  |
| 187 | AIE | 2908  | 0.0001625845 | 132.03 | 0.579 | 0.933  |
| 188 | AIG | 2523  | 0.0001410594 | 106.27 | 0.466 | 1.967  |
| 189 | AIH | 1322  | 0.0000739122 | 137.97 | 0.605 | 1.033  |
| 190 | AII | 2480  | 0.0001386553 | 139.27 | 0.610 | 3.600  |
| 191 | AIL | 5046  | 0.0002821188 | 139.30 | 0.610 | 3.367  |
| 192 | AIK | 2924  | 0.0001634791 | 140.40 | 0.615 | 0.800  |
| 193 | AIM | 988   | 0.0000552385 | 140.30 | 0.615 | 2.733  |
| 194 | AIF | 1962  | 0.0001096942 | 148.60 | 0.651 | 3.033  |
| 195 | AIP | 2561  | 0.0001431840 | 125.60 | 0.550 | 1.567  |
| 196 | AIS | 3867  | 0.0002162016 | 116.43 | 0.510 | 1.833  |
| 197 | AIT | 2515  | 0.0001406121 | 125.13 | 0.548 | 1.867  |
| 198 | AIW | 455   | 0.0000254388 | 160.70 | 0.704 | 1.800  |
| 199 | AIY | 1495  | 0.0000835845 | 150.30 | 0.659 | 1.667  |
| 200 | AIV | 2929  | 0.0001637586 | 130.97 | 0.574 | 3.500  |
| 201 | ALA | 11084 | 0.0006196998 | 114.67 | 0.502 | 2.467  |
| 202 | ALR | 9091  | 0.0005082724 | 149.33 | 0.654 | 0.367  |

|     |     |       |              |        |       |        |
|-----|-----|-------|--------------|--------|-------|--------|
| 203 | ALN | 3885  | 0.0002172080 | 126.23 | 0.553 | 0.700  |
| 204 | ALD | 5821  | 0.0003254486 | 123.77 | 0.542 | 0.700  |
| 205 | ALC | 3116  | 0.0001742137 | 119.10 | 0.522 | 2.700  |
| 206 | ALQ | 7465  | 0.0004173637 | 134.47 | 0.589 | 0.700  |
| 207 | ALE | 8951  | 0.0005004450 | 132.07 | 0.579 | 0.700  |
| 208 | ALG | 9567  | 0.0005348852 | 106.30 | 0.466 | 1.733  |
| 209 | ALH | 3763  | 0.0002103871 | 138.00 | 0.605 | 0.800  |
| 210 | ALI | 4328  | 0.0002419759 | 139.30 | 0.610 | 3.367  |
| 211 | ALL | 14841 | 0.0008297514 | 139.33 | 0.611 | 3.133  |
| 212 | ALK | 6985  | 0.0003905272 | 140.43 | 0.615 | 0.567  |
| 213 | ALM | 2342  | 0.0001309398 | 140.33 | 0.615 | 2.500  |
| 214 | ALF | 3645  | 0.0002037898 | 148.63 | 0.651 | 2.800  |
| 215 | ALP | 7842  | 0.0004384415 | 125.63 | 0.551 | 1.333  |
| 216 | ALS | 9846  | 0.0005504839 | 116.47 | 0.510 | 1.600  |
| 217 | ALT | 6145  | 0.0003435633 | 125.17 | 0.548 | 1.633  |
| 218 | ALW | 1562  | 0.0000873305 | 160.73 | 0.704 | 1.567  |
| 219 | ALY | 3044  | 0.0001701882 | 150.33 | 0.659 | 1.433  |
| 220 | ALV | 7329  | 0.0004097600 | 131.00 | 0.574 | 3.267  |
| 221 | AKA | 5076  | 0.0002837961 | 115.77 | 0.507 | -0.100 |
| 222 | AKR | 3581  | 0.0002002116 | 150.43 | 0.659 | -2.200 |
| 223 | AKN | 2306  | 0.0001289271 | 127.33 | 0.558 | -1.867 |
| 224 | AKD | 3176  | 0.0001775683 | 124.87 | 0.547 | -1.867 |
| 225 | AKC | 967   | 0.0000540644 | 120.20 | 0.527 | 0.133  |
| 226 | AKQ | 2648  | 0.0001480481 | 135.57 | 0.594 | -1.867 |
| 227 | AKE | 5316  | 0.0002972144 | 133.17 | 0.584 | -1.867 |
| 228 | AKG | 3723  | 0.0002081507 | 107.40 | 0.471 | -0.833 |
| 229 | AKH | 1496  | 0.0000836405 | 139.10 | 0.610 | -1.767 |
| 230 | AKI | 2604  | 0.0001455881 | 140.40 | 0.615 | 0.800  |
| 231 | AKL | 5109  | 0.0002856411 | 140.43 | 0.615 | 0.567  |
| 232 | AKK | 4619  | 0.0002582455 | 141.53 | 0.620 | -2.000 |
| 233 | AKM | 1272  | 0.0000711168 | 141.43 | 0.620 | -0.067 |
| 234 | AKF | 1525  | 0.0000852618 | 149.73 | 0.656 | 0.233  |
| 235 | AKP | 3035  | 0.0001696850 | 126.73 | 0.555 | -1.233 |
| 236 | AKS | 3631  | 0.0002030070 | 117.57 | 0.515 | -0.967 |
| 237 | AKT | 2954  | 0.0001651564 | 126.27 | 0.553 | -0.933 |
| 238 | AKW | 591   | 0.0000330425 | 161.83 | 0.709 | -1.000 |
| 239 | AKY | 1545  | 0.0000863800 | 151.43 | 0.664 | -1.133 |
| 240 | AKV | 3722  | 0.0002080948 | 132.10 | 0.579 | 0.700  |
| 241 | AMA | 2467  | 0.0001379285 | 115.67 | 0.507 | 1.833  |
| 242 | AMR | 1201  | 0.0000671472 | 150.33 | 0.659 | -0.267 |
| 243 | AMN | 964   | 0.0000538967 | 127.23 | 0.558 | 0.067  |
| 244 | AMD | 1214  | 0.0000678740 | 124.77 | 0.547 | 0.067  |
| 245 | AMC | 421   | 0.0000235379 | 120.10 | 0.526 | 2.067  |
| 246 | AMQ | 1147  | 0.0000641281 | 135.47 | 0.594 | 0.067  |
| 247 | AME | 2122  | 0.0001186397 | 133.07 | 0.583 | 0.067  |
| 248 | AMG | 1592  | 0.0000890078 | 107.30 | 0.470 | 1.100  |
| 249 | AMH | 498   | 0.0000278429 | 139.00 | 0.609 | 0.167  |
| 250 | AMI | 804   | 0.0000449512 | 140.30 | 0.615 | 2.733  |
| 251 | AML | 2362  | 0.0001320580 | 140.33 | 0.615 | 2.500  |
| 252 | AMK | 1730  | 0.0000967233 | 141.43 | 0.620 | -0.067 |
| 253 | AMM | 632   | 0.0000353347 | 141.33 | 0.619 | 1.867  |
| 254 | AMF | 740   | 0.0000413730 | 149.63 | 0.656 | 2.167  |

|     |     |      |              |        |       |        |
|-----|-----|------|--------------|--------|-------|--------|
| 255 | AMP | 1102 | 0.0000616122 | 126.63 | 0.555 | 0.700  |
| 256 | AMS | 1777 | 0.0000993510 | 117.47 | 0.515 | 0.967  |
| 257 | AMT | 1237 | 0.0000691599 | 126.17 | 0.553 | 1.000  |
| 258 | AMW | 268  | 0.0000149837 | 161.73 | 0.709 | 0.933  |
| 259 | AMY | 552  | 0.0000308620 | 151.33 | 0.663 | 0.800  |
| 260 | AMV | 1544 | 0.0000863241 | 132.00 | 0.578 | 2.633  |
| 261 | AFA | 3166 | 0.0001770092 | 123.97 | 0.543 | 2.133  |
| 262 | AFR | 2975 | 0.0001663305 | 158.63 | 0.695 | 0.033  |
| 263 | AFN | 2073 | 0.0001159002 | 135.53 | 0.594 | 0.367  |
| 264 | AFD | 1850 | 0.0001034324 | 133.07 | 0.583 | 0.367  |
| 265 | AFC | 1252 | 0.0000699986 | 128.40 | 0.563 | 2.367  |
| 266 | AFQ | 2220 | 0.0001241189 | 143.77 | 0.630 | 0.367  |
| 267 | AFE | 2300 | 0.0001285916 | 141.37 | 0.619 | 0.367  |
| 268 | AFG | 2976 | 0.0001663864 | 115.60 | 0.507 | 1.400  |
| 269 | AFH | 1283 | 0.0000717318 | 147.30 | 0.645 | 0.467  |
| 270 | AFI | 2321 | 0.0001297657 | 148.60 | 0.651 | 3.033  |
| 271 | AFL | 5417 | 0.0003028612 | 148.63 | 0.651 | 2.800  |
| 272 | AFK | 2271 | 0.0001269702 | 149.73 | 0.656 | 0.233  |
| 273 | AFM | 928  | 0.0000518839 | 149.63 | 0.656 | 2.167  |
| 274 | AFF | 1916 | 0.0001071224 | 157.93 | 0.692 | 2.467  |
| 275 | AFP | 2704 | 0.0001511790 | 134.93 | 0.591 | 1.000  |
| 276 | AFS | 5414 | 0.0003026935 | 125.77 | 0.551 | 1.267  |
| 277 | AFT | 2488 | 0.0001391026 | 134.47 | 0.589 | 1.300  |
| 278 | AFW | 646  | 0.0000361175 | 170.03 | 0.745 | 1.233  |
| 279 | AFY | 1480 | 0.0000827459 | 159.63 | 0.700 | 1.100  |
| 280 | AFV | 2764 | 0.0001545336 | 140.30 | 0.615 | 2.933  |
| 281 | APA | 9760 | 0.0005456757 | 100.97 | 0.442 | 0.667  |
| 282 | APR | 5567 | 0.0003112476 | 135.63 | 0.594 | -1.433 |
| 283 | APN | 1764 | 0.0000986242 | 112.53 | 0.493 | -1.100 |
| 284 | APD | 2992 | 0.0001672809 | 110.07 | 0.482 | -1.100 |
| 285 | APC | 1453 | 0.0000812364 | 105.40 | 0.462 | 0.900  |
| 286 | APQ | 3453 | 0.0001930552 | 120.77 | 0.529 | -1.100 |
| 287 | APE | 5737 | 0.0003207522 | 118.37 | 0.519 | -1.100 |
| 288 | APG | 9266 | 0.0005180565 | 92.60  | 0.406 | -0.067 |
| 289 | APH | 1756 | 0.0000981769 | 124.30 | 0.545 | -1.000 |
| 290 | API | 1900 | 0.0001062279 | 125.60 | 0.550 | 1.567  |
| 291 | APL | 6621 | 0.0003701761 | 125.63 | 0.551 | 1.333  |
| 292 | APK | 2955 | 0.0001652123 | 126.73 | 0.555 | -1.233 |
| 293 | APM | 1023 | 0.0000571953 | 126.63 | 0.555 | 0.700  |
| 294 | APF | 1885 | 0.0001053892 | 134.93 | 0.591 | 1.000  |
| 295 | APP | 9245 | 0.0005168824 | 111.93 | 0.491 | -0.467 |
| 296 | APS | 7763 | 0.0004340247 | 102.77 | 0.450 | -0.200 |
| 297 | APT | 4540 | 0.0002538287 | 111.47 | 0.488 | -0.167 |
| 298 | APW | 1053 | 0.0000588726 | 147.03 | 0.644 | -0.233 |
| 299 | APY | 1344 | 0.0000751422 | 136.63 | 0.599 | -0.367 |
| 300 | APV | 4866 | 0.0002720551 | 117.30 | 0.514 | 1.467  |
| 301 | ASA | 8609 | 0.0004813240 | 91.80  | 0.402 | 0.933  |
| 302 | ASR | 6244 | 0.0003490983 | 126.47 | 0.554 | -1.167 |
| 303 | ASN | 2805 | 0.0001568259 | 103.37 | 0.453 | -0.833 |
| 304 | ASD | 4173 | 0.0002333099 | 100.90 | 0.442 | -0.833 |
| 305 | ASC | 2323 | 0.0001298775 | 96.23  | 0.422 | 1.167  |
| 306 | ASQ | 4872 | 0.0002723906 | 111.60 | 0.489 | -0.833 |

|     |     |       |              |        |       |        |
|-----|-----|-------|--------------|--------|-------|--------|
| 307 | ASE | 6166  | 0.0003447373 | 109.20 | 0.479 | -0.833 |
| 308 | ASG | 8267  | 0.0004622030 | 83.43  | 0.366 | 0.200  |
| 309 | ASH | 2520  | 0.0001408917 | 115.13 | 0.505 | -0.733 |
| 310 | ASI | 3666  | 0.0002049639 | 116.43 | 0.510 | 1.833  |
| 311 | ASL | 10702 | 0.0005983424 | 116.47 | 0.510 | 1.600  |
| 312 | ASK | 4496  | 0.0002513686 | 117.57 | 0.515 | -0.967 |
| 313 | ASM | 1755  | 0.0000981210 | 117.47 | 0.515 | 0.967  |
| 314 | ASF | 3644  | 0.0002037339 | 125.77 | 0.551 | 1.267  |
| 315 | ASP | 8404  | 0.0004698626 | 102.77 | 0.450 | -0.200 |
| 316 | ASS | 11970 | 0.0006692355 | 93.60  | 0.410 | 0.067  |
| 317 | AST | 6107  | 0.0003414387 | 102.30 | 0.448 | 0.100  |
| 318 | ASW | 1419  | 0.0000793354 | 137.87 | 0.604 | 0.033  |
| 319 | ASY | 2266  | 0.0001266907 | 127.47 | 0.559 | -0.100 |
| 320 | ASV | 6244  | 0.0003490983 | 108.13 | 0.474 | 1.733  |
| 321 | ATA | 6291  | 0.0003517260 | 100.50 | 0.440 | 0.967  |
| 322 | ATR | 3126  | 0.0001747728 | 135.17 | 0.592 | -1.133 |
| 323 | ATN | 2092  | 0.0001169625 | 112.07 | 0.491 | -0.800 |
| 324 | ATD | 2874  | 0.0001606836 | 109.60 | 0.480 | -0.800 |
| 325 | ATC | 1508  | 0.0000843114 | 104.93 | 0.460 | 1.200  |
| 326 | ATQ | 2834  | 0.0001584472 | 120.30 | 0.527 | -0.800 |
| 327 | ATE | 4101  | 0.0002292844 | 117.90 | 0.517 | -0.800 |
| 328 | ATG | 5251  | 0.0002935803 | 92.13  | 0.404 | 0.233  |
| 329 | ATH | 1441  | 0.0000805654 | 123.83 | 0.543 | -0.700 |
| 330 | ATI | 2499  | 0.0001397176 | 125.13 | 0.548 | 1.867  |
| 331 | ATL | 6505  | 0.0003636906 | 125.17 | 0.548 | 1.633  |
| 332 | ATK | 2748  | 0.0001536390 | 126.27 | 0.553 | -0.933 |
| 333 | ATM | 1196  | 0.0000668676 | 126.17 | 0.553 | 1.000  |
| 334 | ATF | 2346  | 0.0001311635 | 134.47 | 0.589 | 1.300  |
| 335 | ATP | 4766  | 0.0002664642 | 111.47 | 0.488 | -0.167 |
| 336 | ATS | 5888  | 0.0003291946 | 102.30 | 0.448 | 0.100  |
| 337 | ATT | 3997  | 0.0002234699 | 111.00 | 0.486 | 0.133  |
| 338 | ATW | 820   | 0.0000458457 | 146.57 | 0.642 | 0.067  |
| 339 | ATY | 1533  | 0.0000857091 | 136.17 | 0.597 | -0.067 |
| 340 | ATV | 4820  | 0.0002694833 | 116.83 | 0.512 | 1.767  |
| 341 | AWA | 1281  | 0.0000716199 | 136.07 | 0.596 | 0.900  |
| 342 | AWR | 1079  | 0.0000603262 | 170.73 | 0.748 | -1.200 |
| 343 | AWN | 621   | 0.0000347197 | 147.63 | 0.647 | -0.867 |
| 344 | AWD | 736   | 0.0000411493 | 145.17 | 0.636 | -0.867 |
| 345 | AWC | 332   | 0.0000185619 | 140.50 | 0.616 | 1.133  |
| 346 | AWQ | 719   | 0.0000401989 | 155.87 | 0.683 | -0.867 |
| 347 | AWE | 1017  | 0.0000568599 | 153.47 | 0.673 | -0.867 |
| 348 | AWG | 1287  | 0.0000719554 | 127.70 | 0.560 | 0.167  |
| 349 | AWH | 373   | 0.0000208542 | 159.40 | 0.699 | -0.767 |
| 350 | AWI | 592   | 0.0000330984 | 160.70 | 0.704 | 1.800  |
| 351 | AWL | 1703  | 0.0000952137 | 160.73 | 0.704 | 1.567  |
| 352 | AWK | 880   | 0.0000492003 | 161.83 | 0.709 | -1.000 |
| 353 | AWM | 356   | 0.0000199037 | 161.73 | 0.709 | 0.933  |
| 354 | AWF | 468   | 0.0000261656 | 170.03 | 0.745 | 1.233  |
| 355 | AWP | 866   | 0.0000484175 | 147.03 | 0.644 | -0.233 |
| 356 | AWS | 1120  | 0.0000626185 | 137.87 | 0.604 | 0.033  |
| 357 | AWT | 782   | 0.0000437211 | 146.57 | 0.642 | 0.067  |
| 358 | AWW | 232   | 0.0000129710 | 182.13 | 0.798 | 0.000  |

|     |     |      |              |        |       |        |
|-----|-----|------|--------------|--------|-------|--------|
| 359 | AWY | 354  | 0.0000197919 | 171.73 | 0.753 | -0.133 |
| 360 | AWV | 1028 | 0.0000574749 | 152.40 | 0.668 | 1.700  |
| 361 | AYA | 1680 | 0.0000939278 | 125.67 | 0.551 | 0.767  |
| 362 | AYR | 1633 | 0.0000913000 | 160.33 | 0.703 | -1.333 |
| 363 | AYN | 957  | 0.0000535053 | 137.23 | 0.601 | -1.000 |
| 364 | AYD | 1377 | 0.0000769872 | 134.77 | 0.591 | -1.000 |
| 365 | AYC | 678  | 0.0000379066 | 130.10 | 0.570 | 1.000  |
| 366 | AYQ | 1157 | 0.0000646872 | 145.47 | 0.637 | -1.000 |
| 367 | AYE | 1503 | 0.0000840318 | 143.07 | 0.627 | -1.000 |
| 368 | AYG | 1867 | 0.0001043829 | 117.30 | 0.514 | 0.033  |
| 369 | AYH | 724  | 0.0000404784 | 149.00 | 0.653 | -0.900 |
| 370 | AYI | 1442 | 0.0000806214 | 150.30 | 0.659 | 1.667  |
| 371 | AYL | 2719 | 0.0001520177 | 150.33 | 0.659 | 1.433  |
| 372 | AYK | 1198 | 0.0000669795 | 151.43 | 0.664 | -1.133 |
| 373 | AYM | 509  | 0.0000284579 | 151.33 | 0.663 | 0.800  |
| 374 | AYF | 1029 | 0.0000575308 | 159.63 | 0.700 | 1.100  |
| 375 | AYP | 1273 | 0.0000711727 | 136.63 | 0.599 | -0.367 |
| 376 | AYS | 2111 | 0.0001180247 | 127.47 | 0.559 | -0.100 |
| 377 | AYT | 1478 | 0.0000826341 | 136.17 | 0.597 | -0.067 |
| 378 | AYW | 327  | 0.0000182824 | 171.73 | 0.753 | -0.133 |
| 379 | AYY | 853  | 0.0000476907 | 161.33 | 0.707 | -0.267 |
| 380 | AYV | 1659 | 0.0000927537 | 142.00 | 0.622 | 1.567  |
| 381 | AVA | 8096 | 0.0004526425 | 106.33 | 0.466 | 2.600  |
| 382 | AVR | 4433 | 0.0002478464 | 141.00 | 0.618 | 0.500  |
| 383 | AVN | 2801 | 0.0001566022 | 117.90 | 0.517 | 0.833  |
| 384 | AVD | 3864 | 0.0002160339 | 115.43 | 0.506 | 0.833  |
| 385 | AVC | 2139 | 0.0001195902 | 110.77 | 0.485 | 2.833  |
| 386 | AVQ | 3945 | 0.0002205626 | 126.13 | 0.553 | 0.833  |
| 387 | AVE | 5062 | 0.0002830134 | 123.73 | 0.542 | 0.833  |
| 388 | AVG | 5858 | 0.0003275173 | 97.97  | 0.429 | 1.867  |
| 389 | AVH | 2151 | 0.0001202611 | 129.67 | 0.568 | 0.933  |
| 390 | AVI | 3556 | 0.0001988138 | 130.97 | 0.574 | 3.500  |
| 391 | AVL | 8981 | 0.0005021223 | 131.00 | 0.574 | 3.267  |
| 392 | AVK | 3933 | 0.0002198917 | 132.10 | 0.579 | 0.700  |
| 393 | AVM | 1595 | 0.0000891755 | 132.00 | 0.578 | 2.633  |
| 394 | AVF | 3140 | 0.0001755555 | 140.30 | 0.615 | 2.933  |
| 395 | AVP | 5371 | 0.0003002894 | 117.30 | 0.514 | 1.467  |
| 396 | AVS | 6815 | 0.0003810225 | 108.13 | 0.474 | 1.733  |
| 397 | AVT | 4849 | 0.0002711047 | 116.83 | 0.512 | 1.767  |
| 398 | AVW | 994  | 0.0000555739 | 152.40 | 0.668 | 1.700  |
| 399 | AVY | 2180 | 0.0001218825 | 142.00 | 0.622 | 1.567  |
| 400 | AVV | 5764 | 0.0003222618 | 122.67 | 0.538 | 3.400  |
| 401 | RAA | 7965 | 0.0004453184 | 124.67 | 0.546 | -0.300 |
| 402 | RAR | 6524 | 0.0003647529 | 159.33 | 0.698 | -2.400 |
| 403 | RAN | 1531 | 0.0000855973 | 136.23 | 0.597 | -2.067 |
| 404 | RAD | 2173 | 0.0001214911 | 133.77 | 0.586 | -2.067 |
| 405 | RAC | 1591 | 0.0000889519 | 129.10 | 0.566 | -0.067 |
| 406 | RAQ | 4012 | 0.0002243085 | 144.47 | 0.633 | -2.067 |
| 407 | RAE | 4817 | 0.0002693156 | 142.07 | 0.623 | -2.067 |
| 408 | RAG | 6143 | 0.0003434515 | 116.30 | 0.510 | -1.033 |
| 409 | RAH | 2181 | 0.0001219384 | 148.00 | 0.649 | -1.967 |
| 410 | RAI | 2596 | 0.0001451408 | 149.30 | 0.654 | 0.600  |



|     |     |       |              |        |       |        |
|-----|-----|-------|--------------|--------|-------|--------|
| 411 | RAL | 8842  | 0.0004943509 | 149.33 | 0.654 | 0.367  |
| 412 | RAK | 3552  | 0.0001985902 | 150.43 | 0.659 | -2.200 |
| 413 | RAM | 1311  | 0.0000732972 | 150.33 | 0.659 | -0.267 |
| 414 | RAF | 2714  | 0.0001517381 | 158.63 | 0.695 | 0.033  |
| 415 | RAP | 5153  | 0.0002881011 | 135.63 | 0.594 | -1.433 |
| 416 | RAS | 5741  | 0.0003209759 | 126.47 | 0.554 | -1.167 |
| 417 | RAT | 3257  | 0.0001820969 | 135.17 | 0.592 | -1.133 |
| 418 | RAW | 1094  | 0.0000611649 | 170.73 | 0.748 | -1.200 |
| 419 | RAY | 1359  | 0.0000759809 | 160.33 | 0.703 | -1.333 |
| 420 | RAV | 4592  | 0.0002567360 | 141.00 | 0.618 | 0.500  |
| 421 | RRA | 6740  | 0.0003768294 | 159.33 | 0.698 | -2.400 |
| 422 | RRR | 10416 | 0.0005823523 | 194.00 | 0.850 | -4.500 |
| 423 | RRN | 2352  | 0.0001314989 | 170.90 | 0.749 | -4.167 |
| 424 | RRD | 2859  | 0.0001598450 | 168.43 | 0.738 | -4.167 |
| 425 | RRC | 1890  | 0.0001056688 | 163.77 | 0.718 | -2.167 |
| 426 | RRQ | 4291  | 0.0002399072 | 179.13 | 0.785 | -4.167 |
| 427 | RRE | 5174  | 0.0002892752 | 176.73 | 0.774 | -4.167 |
| 428 | RRG | 6524  | 0.0003647529 | 150.97 | 0.662 | -3.133 |
| 429 | RRH | 2743  | 0.0001533595 | 182.67 | 0.800 | -4.067 |
| 430 | RRI | 2819  | 0.0001576086 | 183.97 | 0.806 | -1.500 |
| 431 | RRL | 8550  | 0.0004780254 | 184.00 | 0.806 | -1.733 |
| 432 | RRK | 5232  | 0.0002925180 | 185.10 | 0.811 | -4.300 |
| 433 | RRM | 1402  | 0.0000783850 | 185.00 | 0.811 | -2.367 |
| 434 | RRF | 2577  | 0.0001440785 | 193.30 | 0.847 | -2.067 |
| 435 | RRP | 5327  | 0.0002978294 | 170.30 | 0.746 | -3.533 |
| 436 | RRS | 6835  | 0.0003821407 | 161.13 | 0.706 | -3.267 |
| 437 | RRT | 3594  | 0.0002009384 | 169.83 | 0.744 | -3.233 |
| 438 | RRW | 1310  | 0.0000732413 | 205.40 | 0.900 | -3.300 |
| 439 | RRY | 1752  | 0.0000979533 | 195.00 | 0.855 | -3.433 |
| 440 | RRV | 4167  | 0.0002329745 | 175.67 | 0.770 | -1.600 |
| 441 | RNA | 2152  | 0.0001203170 | 136.23 | 0.597 | -2.067 |
| 442 | RNR | 2379  | 0.0001330085 | 170.90 | 0.749 | -4.167 |
| 443 | RNN | 1316  | 0.0000735768 | 147.80 | 0.648 | -3.833 |
| 444 | RND | 1443  | 0.0000806773 | 145.33 | 0.637 | -3.833 |
| 445 | RNC | 852   | 0.0000476348 | 140.67 | 0.616 | -1.833 |
| 446 | RNQ | 1658  | 0.0000926978 | 156.03 | 0.684 | -3.833 |
| 447 | RNE | 1836  | 0.0001026497 | 153.63 | 0.673 | -3.833 |
| 448 | RNG | 2285  | 0.0001277530 | 127.87 | 0.560 | -2.800 |
| 449 | RNH | 1159  | 0.0000647990 | 159.57 | 0.699 | -3.733 |
| 450 | RNI | 2009  | 0.0001123220 | 160.87 | 0.705 | -1.167 |
| 451 | RNL | 4376  | 0.0002446595 | 160.90 | 0.705 | -1.400 |
| 452 | RNK | 2278  | 0.0001273616 | 162.00 | 0.710 | -3.967 |
| 453 | RNM | 790   | 0.0000441684 | 161.90 | 0.709 | -2.033 |
| 454 | RNF | 1435  | 0.0000802300 | 170.20 | 0.746 | -1.733 |
| 455 | RNP | 2273  | 0.0001270821 | 147.20 | 0.645 | -3.200 |
| 456 | RNS | 3133  | 0.0001751642 | 138.03 | 0.605 | -2.933 |
| 457 | RNT | 1883  | 0.0001052774 | 146.73 | 0.643 | -2.900 |
| 458 | RNW | 492   | 0.0000275074 | 182.30 | 0.799 | -2.967 |
| 459 | RNY | 1060  | 0.0000592640 | 171.90 | 0.753 | -3.100 |
| 460 | RNV | 2217  | 0.0001239511 | 152.57 | 0.669 | -1.267 |
| 461 | RDA | 3397  | 0.0001899242 | 133.77 | 0.586 | -2.067 |
| 462 | RDR | 3545  | 0.0001981988 | 168.43 | 0.738 | -4.167 |

|     |     |      |              |        |       |        |
|-----|-----|------|--------------|--------|-------|--------|
| 463 | RDN | 1355 | 0.0000757572 | 145.33 | 0.637 | -3.833 |
| 464 | RDD | 1792 | 0.0001001896 | 142.87 | 0.626 | -3.833 |
| 465 | RDC | 1162 | 0.0000649667 | 138.20 | 0.606 | -1.833 |
| 466 | RDQ | 1922 | 0.0001074579 | 153.57 | 0.673 | -3.833 |
| 467 | RDE | 2801 | 0.0001566022 | 151.17 | 0.662 | -3.833 |
| 468 | RDG | 3582 | 0.0002002675 | 125.40 | 0.550 | -2.800 |
| 469 | RDH | 1286 | 0.0000718995 | 157.10 | 0.688 | -3.733 |
| 470 | RDI | 2196 | 0.0001227770 | 158.40 | 0.694 | -1.167 |
| 471 | RDL | 5772 | 0.0003227091 | 158.43 | 0.694 | -1.400 |
| 472 | RDK | 2246 | 0.0001255725 | 159.53 | 0.699 | -3.967 |
| 473 | RDM | 915  | 0.0000511571 | 159.43 | 0.699 | -2.033 |
| 474 | RDF | 2137 | 0.0001194784 | 167.73 | 0.735 | -1.733 |
| 475 | RDP | 3146 | 0.0001758910 | 144.73 | 0.634 | -3.200 |
| 476 | RDS | 4096 | 0.0002290049 | 135.57 | 0.594 | -2.933 |
| 477 | RDT | 2172 | 0.0001214352 | 144.27 | 0.632 | -2.900 |
| 478 | RDW | 784  | 0.0000438330 | 179.83 | 0.788 | -2.967 |
| 479 | RDY | 1467 | 0.0000820191 | 169.43 | 0.742 | -3.100 |
| 480 | RDV | 3317 | 0.0001854515 | 150.10 | 0.658 | -1.267 |
| 481 | RCA | 1247 | 0.0000697190 | 129.10 | 0.566 | -0.067 |
| 482 | RCR | 1824 | 0.0001019787 | 163.77 | 0.718 | -2.167 |
| 483 | RCN | 729  | 0.0000407580 | 140.67 | 0.616 | -1.833 |
| 484 | RCD | 916  | 0.0000512130 | 138.20 | 0.606 | -1.833 |
| 485 | RCC | 767  | 0.0000428825 | 133.53 | 0.585 | 0.167  |
| 486 | RCQ | 1304 | 0.0000729059 | 148.90 | 0.652 | -1.833 |
| 487 | RCE | 1305 | 0.0000729618 | 146.50 | 0.642 | -1.833 |
| 488 | RCG | 1573 | 0.0000879455 | 120.73 | 0.529 | -0.800 |
| 489 | RCH | 872  | 0.0000487530 | 152.43 | 0.668 | -1.733 |
| 490 | RCI | 990  | 0.0000553503 | 153.73 | 0.674 | 0.833  |
| 491 | RCL | 2436 | 0.0001361953 | 153.77 | 0.674 | 0.600  |
| 492 | RCK | 939  | 0.0000524989 | 154.87 | 0.679 | -1.967 |
| 493 | RCM | 316  | 0.0000176674 | 154.77 | 0.678 | -0.033 |
| 494 | RCF | 873  | 0.0000488089 | 163.07 | 0.715 | 0.267  |
| 495 | RCP | 1718 | 0.0000960523 | 140.07 | 0.614 | -1.200 |
| 496 | RCS | 1994 | 0.0001114833 | 130.90 | 0.574 | -0.933 |
| 497 | RCT | 964  | 0.0000538967 | 139.60 | 0.612 | -0.900 |
| 498 | RCW | 422  | 0.0000235938 | 175.17 | 0.768 | -0.967 |
| 499 | RCY | 764  | 0.0000427148 | 164.77 | 0.722 | -1.100 |
| 500 | RCV | 1396 | 0.0000780495 | 145.43 | 0.637 | 0.733  |
| 501 | RQA | 3838 | 0.0002145803 | 144.47 | 0.633 | -2.067 |
| 502 | RQR | 4198 | 0.0002347077 | 179.13 | 0.785 | -4.167 |
| 503 | RQN | 1477 | 0.0000825782 | 156.03 | 0.684 | -3.833 |
| 504 | RQD | 1798 | 0.0001005251 | 153.57 | 0.673 | -3.833 |
| 505 | RQC | 938  | 0.0000524430 | 148.90 | 0.652 | -1.833 |
| 506 | RQQ | 3115 | 0.0001741578 | 164.27 | 0.720 | -3.833 |
| 507 | RQE | 3660 | 0.0002046284 | 161.87 | 0.709 | -3.833 |
| 508 | RQG | 2990 | 0.0001671691 | 136.10 | 0.596 | -2.800 |
| 509 | RQH | 1461 | 0.0000816836 | 167.80 | 0.735 | -3.733 |
| 510 | RQI | 1849 | 0.0001033765 | 169.10 | 0.741 | -1.167 |
| 511 | RQL | 5576 | 0.0003117508 | 169.13 | 0.741 | -1.400 |
| 512 | RQK | 3038 | 0.0001698528 | 170.23 | 0.746 | -3.967 |
| 513 | RQM | 990  | 0.0000553503 | 170.13 | 0.746 | -2.033 |
| 514 | RQF | 1367 | 0.0000764282 | 178.43 | 0.782 | -1.733 |

|     |     |      |              |        |       |        |
|-----|-----|------|--------------|--------|-------|--------|
| 515 | RQP | 2524 | 0.0001411153 | 155.43 | 0.681 | -3.200 |
| 516 | RQS | 2750 | 0.0001537509 | 146.27 | 0.641 | -2.933 |
| 517 | RQT | 1871 | 0.0001046065 | 154.97 | 0.679 | -2.900 |
| 518 | RQW | 569  | 0.0000318124 | 190.53 | 0.835 | -2.967 |
| 519 | RQY | 1045 | 0.0000584253 | 180.13 | 0.789 | -3.100 |
| 520 | RQV | 2690 | 0.0001503963 | 160.80 | 0.705 | -1.267 |
| 521 | REA | 6134 | 0.0003429482 | 142.07 | 0.623 | -2.067 |
| 522 | RER | 6324 | 0.0003535711 | 176.73 | 0.774 | -4.167 |
| 523 | REN | 2578 | 0.0001441344 | 153.63 | 0.673 | -3.833 |
| 524 | RED | 3430 | 0.0001917692 | 151.17 | 0.662 | -3.833 |
| 525 | REC | 1292 | 0.0000722349 | 146.50 | 0.642 | -1.833 |
| 526 | REQ | 3865 | 0.0002160898 | 161.87 | 0.709 | -3.833 |
| 527 | REE | 6721 | 0.0003757671 | 159.47 | 0.699 | -3.833 |
| 528 | REG | 4374 | 0.0002445477 | 133.70 | 0.586 | -2.800 |
| 529 | REH | 1753 | 0.0000980092 | 165.40 | 0.725 | -3.733 |
| 530 | REI | 2919 | 0.0001631995 | 166.70 | 0.730 | -1.167 |
| 531 | REL | 7551 | 0.0004221719 | 166.73 | 0.731 | -1.400 |
| 532 | REK | 5547 | 0.0003101294 | 167.83 | 0.735 | -3.967 |
| 533 | REM | 1522 | 0.0000850941 | 167.73 | 0.735 | -2.033 |
| 534 | REF | 2009 | 0.0001123220 | 176.03 | 0.771 | -1.733 |
| 535 | REP | 3226 | 0.0001803637 | 153.03 | 0.671 | -3.200 |
| 536 | RES | 4118 | 0.0002302349 | 143.87 | 0.630 | -2.933 |
| 537 | RET | 3087 | 0.0001725923 | 152.57 | 0.669 | -2.900 |
| 538 | REW | 748  | 0.0000418202 | 188.13 | 0.824 | -2.967 |
| 539 | REY | 1428 | 0.0000798386 | 177.73 | 0.779 | -3.100 |
| 540 | REV | 3962 | 0.0002215130 | 158.40 | 0.694 | -1.267 |
| 541 | RGA | 5824 | 0.0003256163 | 116.30 | 0.510 | -1.033 |
| 542 | RGR | 7287 | 0.0004074118 | 150.97 | 0.662 | -3.133 |
| 543 | RGN | 2071 | 0.0001157884 | 127.87 | 0.560 | -2.800 |
| 544 | RGD | 3137 | 0.0001753878 | 125.40 | 0.550 | -2.800 |
| 545 | RGC | 1619 | 0.0000905173 | 120.73 | 0.529 | -0.800 |
| 546 | RGQ | 3234 | 0.0001808110 | 136.10 | 0.596 | -2.800 |
| 547 | RGE | 4142 | 0.0002315767 | 133.70 | 0.586 | -2.800 |
| 548 | RGG | 6507 | 0.0003638025 | 107.93 | 0.473 | -1.767 |
| 549 | RGH | 2120 | 0.0001185279 | 139.63 | 0.612 | -2.700 |
| 550 | RGI | 2288 | 0.0001279207 | 140.93 | 0.618 | -0.133 |
| 551 | RGL | 7007 | 0.0003917572 | 140.97 | 0.618 | -0.367 |
| 552 | RGK | 3338 | 0.0001866256 | 142.07 | 0.623 | -2.933 |
| 553 | RGM | 1176 | 0.0000657495 | 141.97 | 0.622 | -1.000 |
| 554 | RGF | 2592 | 0.0001449172 | 150.27 | 0.658 | -0.700 |
| 555 | RGP | 5987 | 0.0003347296 | 127.27 | 0.558 | -2.167 |
| 556 | RGS | 6460 | 0.0003611747 | 118.10 | 0.518 | -1.900 |
| 557 | RGT | 3256 | 0.0001820410 | 126.80 | 0.556 | -1.867 |
| 558 | RGW | 1206 | 0.0000674267 | 162.37 | 0.712 | -1.933 |
| 559 | RGY | 1812 | 0.0001013078 | 151.97 | 0.666 | -2.067 |
| 560 | RGV | 3417 | 0.0001910424 | 132.63 | 0.581 | -0.233 |
| 561 | RHA | 1402 | 0.0000783850 | 148.00 | 0.649 | -1.967 |
| 562 | RHR | 2561 | 0.0001431840 | 182.67 | 0.800 | -4.067 |
| 563 | RHN | 836  | 0.0000467403 | 159.57 | 0.699 | -3.733 |
| 564 | RHD | 816  | 0.0000456221 | 157.10 | 0.688 | -3.733 |
| 565 | RHC | 859  | 0.0000480262 | 152.43 | 0.668 | -1.733 |
| 566 | RHQ | 1912 | 0.0001068988 | 167.80 | 0.735 | -3.733 |

|     |      |       |              |        |       |        |
|-----|------|-------|--------------|--------|-------|--------|
| 567 | RHE  | 1408  | 0.0000787204 | 165.40 | 0.725 | -3.733 |
| 568 | RHG  | 2033  | 0.0001136638 | 139.63 | 0.612 | -2.700 |
| 569 | RHH  | 1100  | 0.0000615003 | 171.33 | 0.751 | -3.633 |
| 570 | RHI  | 1224  | 0.0000684331 | 172.63 | 0.757 | -1.067 |
| 571 | RHL  | 3440  | 0.0001923283 | 172.67 | 0.757 | -1.300 |
| 572 | RHK  | 1656  | 0.0000925860 | 173.77 | 0.761 | -3.867 |
| 573 | RHM  | 703   | 0.0000393043 | 173.67 | 0.761 | -1.933 |
| 574 | RHF  | 1166  | 0.0000651904 | 181.97 | 0.797 | -1.633 |
| 575 | RHP  | 1875  | 0.0001048301 | 158.97 | 0.697 | -3.100 |
| 576 | RHS  | 2537  | 0.0001418421 | 149.80 | 0.656 | -2.833 |
| 577 | RHT  | 1351  | 0.0000755336 | 158.50 | 0.695 | -2.800 |
| 578 | RHW  | 478   | 0.0000267247 | 194.07 | 0.850 | -2.867 |
| 579 | RHY  | 846   | 0.0000472994 | 183.67 | 0.805 | -3.000 |
| 580 | RHV  | 1500  | 0.0000838641 | 164.33 | 0.720 | -1.167 |
| 581 | RIA  | 2396  | 0.0001339589 | 149.30 | 0.654 | 0.600  |
| 582 | RIR  | 2732  | 0.0001527445 | 183.97 | 0.806 | -1.500 |
| 583 | RIN  | 1418  | 0.0000792795 | 160.87 | 0.705 | -1.167 |
| 584 | RID  | 1382  | 0.0000772668 | 158.40 | 0.694 | -1.167 |
| 585 | RIC  | 906   | 0.0000506539 | 153.73 | 0.674 | 0.833  |
| 586 | RIQ  | 2339  | 0.0001307721 | 169.10 | 0.741 | -1.167 |
| 587 | RIE  | 2218  | 0.0001240071 | 166.70 | 0.730 | -1.167 |
| 588 | RIG  | 2006  | 0.0001121543 | 140.93 | 0.618 | -0.133 |
| 589 | RIH  | 3784  | 0.0002115612 | 172.63 | 0.757 | -1.067 |
| 590 | RII  | 2011  | 0.0001124338 | 173.93 | 0.762 | 1.500  |
| 591 | RIL  | 4611  | 0.0002577982 | 173.97 | 0.762 | 1.267  |
| 592 | RIK  | 2321  | 0.0001297657 | 175.07 | 0.767 | -1.300 |
| 593 | RIM  | 828   | 0.0000462930 | 174.97 | 0.767 | 0.633  |
| 594 | RIF  | 1701  | 0.0000951019 | 183.27 | 0.803 | 0.933  |
| 595 | RIP  | 2493  | 0.0001393821 | 160.27 | 0.702 | -0.533 |
| 596 | RIS  | 3390  | 0.0001895329 | 151.10 | 0.662 | -0.267 |
| 597 | RIT  | 2217  | 0.0001239511 | 159.80 | 0.700 | -0.233 |
| 598 | RIW  | 543   | 0.0000303588 | 195.37 | 0.856 | -0.300 |
| 599 | RIY  | 1401  | 0.0000783291 | 184.97 | 0.811 | -0.433 |
| 600 | RIV  | 2174  | 0.0001215470 | 165.63 | 0.726 | 1.400  |
| 601 | RLA  | 7154  | 0.0003999758 | 149.33 | 0.654 | 0.367  |
| 602 | RLR  | 8178  | 0.0004572271 | 184.00 | 0.806 | -1.733 |
| 603 | RLN  | 2801  | 0.0001566022 | 160.90 | 0.705 | -1.400 |
| 604 | RLD  | 3762  | 0.0002103312 | 158.43 | 0.694 | -1.400 |
| 605 | RLC  | 2331  | 0.0001303248 | 153.77 | 0.674 | 0.600  |
| 606 | RLQ  | 6640  | 0.0003712384 | 169.13 | 0.741 | -1.400 |
| 607 | RL E | 6874  | 0.0003843212 | 166.73 | 0.731 | -1.400 |
| 608 | RLG  | 5842  | 0.0003266227 | 140.97 | 0.618 | -0.367 |
| 609 | RLH  | 3226  | 0.0001803637 | 172.67 | 0.757 | -1.300 |
| 610 | RLI  | 3245  | 0.0001814260 | 173.97 | 0.762 | 1.267  |
| 611 | RL L | 11907 | 0.0006657132 | 174.00 | 0.762 | 1.033  |
| 612 | RLK  | 5402  | 0.0003020226 | 175.10 | 0.767 | -1.533 |
| 613 | RLM  | 1601  | 0.0000895109 | 175.00 | 0.767 | 0.400  |
| 614 | RL F | 3276  | 0.0001831592 | 183.30 | 0.803 | 0.700  |
| 615 | RLP  | 6162  | 0.0003445137 | 160.30 | 0.702 | -0.767 |
| 616 | RLS  | 7459  | 0.0004170282 | 151.13 | 0.662 | -0.500 |
| 617 | RL T | 4202  | 0.0002349313 | 159.83 | 0.700 | -0.467 |
| 618 | RLW  | 1557  | 0.0000870509 | 195.40 | 0.856 | -0.533 |

|     |     |      |              |        |       |        |
|-----|-----|------|--------------|--------|-------|--------|
| 619 | RLY | 2374 | 0.0001327289 | 185.00 | 0.811 | -0.667 |
| 620 | RLV | 5141 | 0.0002874302 | 165.67 | 0.726 | 1.167  |
| 621 | RKA | 4708 | 0.0002632214 | 150.43 | 0.659 | -2.200 |
| 622 | RKR | 5332 | 0.0002981089 | 185.10 | 0.811 | -4.300 |
| 623 | RKN | 2390 | 0.0001336235 | 162.00 | 0.710 | -3.967 |
| 624 | RKD | 2775 | 0.0001551486 | 159.53 | 0.699 | -3.967 |
| 625 | RKC | 1188 | 0.0000664204 | 154.87 | 0.679 | -1.967 |
| 626 | RKQ | 3089 | 0.0001727041 | 170.23 | 0.746 | -3.967 |
| 627 | RKE | 5013 | 0.0002802738 | 167.83 | 0.735 | -3.967 |
| 628 | RKG | 3699 | 0.0002068089 | 142.07 | 0.623 | -2.933 |
| 629 | RKH | 1850 | 0.0001034324 | 173.77 | 0.761 | -3.867 |
| 630 | RKI | 2924 | 0.0001634791 | 175.07 | 0.767 | -1.300 |
| 631 | RKL | 6162 | 0.0003445137 | 175.10 | 0.767 | -1.533 |
| 632 | RKK | 5496 | 0.0003072781 | 176.20 | 0.772 | -4.100 |
| 633 | RKM | 1489 | 0.0000832491 | 176.10 | 0.772 | -2.167 |
| 634 | RKF | 1991 | 0.0001113156 | 184.40 | 0.808 | -1.867 |
| 635 | RKP | 3222 | 0.0001801401 | 161.40 | 0.707 | -3.333 |
| 636 | RKS | 4466 | 0.0002496914 | 152.23 | 0.667 | -3.067 |
| 637 | RKT | 3180 | 0.0001777919 | 160.93 | 0.705 | -3.033 |
| 638 | RKW | 727  | 0.0000406461 | 196.50 | 0.861 | -3.100 |
| 639 | RKY | 1607 | 0.0000898464 | 186.10 | 0.816 | -3.233 |
| 640 | RKV | 3567 | 0.0001994288 | 166.77 | 0.731 | -1.400 |
| 641 | RMA | 1489 | 0.0000832491 | 150.33 | 0.659 | -0.267 |
| 642 | RMR | 1199 | 0.0000670354 | 185.00 | 0.811 | -2.367 |
| 643 | RMN | 713  | 0.0000398634 | 161.90 | 0.709 | -2.033 |
| 644 | RMD | 878  | 0.0000490885 | 159.43 | 0.699 | -2.033 |
| 645 | RMC | 345  | 0.0000192887 | 154.77 | 0.678 | -0.033 |
| 646 | RMQ | 908  | 0.0000507657 | 170.13 | 0.746 | -2.033 |
| 647 | RME | 1531 | 0.0000855973 | 167.73 | 0.735 | -2.033 |
| 648 | RMG | 1032 | 0.0000576985 | 141.97 | 0.622 | -1.000 |
| 649 | RMH | 612  | 0.0000342166 | 173.67 | 0.761 | -1.933 |
| 650 | RMI | 722  | 0.0000403666 | 174.97 | 0.767 | 0.633  |
| 651 | RML | 1943 | 0.0001086320 | 175.00 | 0.767 | 0.400  |
| 652 | RMK | 1336 | 0.0000746950 | 176.10 | 0.772 | -2.167 |
| 653 | RMM | 434  | 0.0000242647 | 176.00 | 0.771 | -0.233 |
| 654 | RMF | 704  | 0.0000393602 | 184.30 | 0.808 | 0.067  |
| 655 | RMP | 941  | 0.0000526107 | 161.30 | 0.707 | -1.400 |
| 656 | RMS | 1393 | 0.0000778818 | 152.13 | 0.667 | -1.133 |
| 657 | RMT | 887  | 0.0000495916 | 160.83 | 0.705 | -1.100 |
| 658 | RMW | 234  | 0.0000130828 | 196.40 | 0.861 | -1.167 |
| 659 | RMY | 520  | 0.0000290729 | 186.00 | 0.815 | -1.300 |
| 660 | RMV | 1203 | 0.0000672590 | 166.67 | 0.730 | 0.533  |
| 661 | RFA | 1617 | 0.0000904055 | 158.63 | 0.695 | 0.033  |
| 662 | RFR | 2219 | 0.0001240630 | 193.30 | 0.847 | -2.067 |
| 663 | RFN | 1043 | 0.0000583135 | 170.20 | 0.746 | -1.733 |
| 664 | RFD | 1346 | 0.0000752541 | 167.73 | 0.735 | -1.733 |
| 665 | RFC | 944  | 0.0000527785 | 163.07 | 0.715 | 0.267  |
| 666 | RFQ | 1720 | 0.0000961642 | 178.43 | 0.782 | -1.733 |
| 667 | RFE | 1602 | 0.0000895669 | 176.03 | 0.771 | -1.733 |
| 668 | RFG | 2065 | 0.0001154529 | 150.27 | 0.658 | -0.700 |
| 669 | RFH | 1077 | 0.0000602144 | 181.97 | 0.797 | -1.633 |
| 670 | RFI | 1385 | 0.0000774345 | 183.27 | 0.803 | 0.933  |

|     |     |      |              |        |       |        |
|-----|-----|------|--------------|--------|-------|--------|
| 671 | RFL | 4024 | 0.0002249794 | 183.30 | 0.803 | 0.700  |
| 672 | RFK | 1438 | 0.0000803977 | 184.40 | 0.808 | -1.867 |
| 673 | RFM | 600  | 0.0000335456 | 184.30 | 0.808 | 0.067  |
| 674 | RFF | 1353 | 0.0000756454 | 192.60 | 0.844 | 0.367  |
| 675 | RFP | 2040 | 0.0001140552 | 169.60 | 0.743 | -1.100 |
| 676 | RFS | 3010 | 0.0001682873 | 160.43 | 0.703 | -0.833 |
| 677 | RFT | 1668 | 0.0000932569 | 169.13 | 0.741 | -0.800 |
| 678 | RFW | 518  | 0.0000289611 | 204.70 | 0.897 | -0.867 |
| 679 | RFY | 1082 | 0.0000604940 | 194.30 | 0.851 | -1.000 |
| 680 | RFV | 1678 | 0.0000938160 | 174.97 | 0.767 | 0.833  |
| 681 | RPA | 5094 | 0.0002848025 | 135.63 | 0.594 | -1.433 |
| 682 | RPR | 5809 | 0.0003247777 | 170.30 | 0.746 | -3.533 |
| 683 | RPN | 1375 | 0.0000768754 | 147.20 | 0.645 | -3.200 |
| 684 | RPD | 2603 | 0.0001455322 | 144.73 | 0.634 | -3.200 |
| 685 | RPC | 1321 | 0.0000738563 | 140.07 | 0.614 | -1.200 |
| 686 | RPQ | 2972 | 0.0001661627 | 155.43 | 0.681 | -3.200 |
| 687 | RPE | 3768 | 0.0002106666 | 153.03 | 0.671 | -3.200 |
| 688 | RPG | 6572 | 0.0003674366 | 127.27 | 0.558 | -2.167 |
| 689 | RPH | 1699 | 0.0000949901 | 158.97 | 0.697 | -3.100 |
| 690 | RPI | 1603 | 0.0000896228 | 160.27 | 0.702 | -0.533 |
| 691 | RPL | 5939 | 0.0003320459 | 160.30 | 0.702 | -0.767 |
| 692 | RPK | 2520 | 0.0001408917 | 161.40 | 0.707 | -3.333 |
| 693 | RPM | 845  | 0.0000472434 | 161.30 | 0.707 | -1.400 |
| 694 | RPF | 2288 | 0.0001279207 | 169.60 | 0.743 | -1.100 |
| 695 | RPP | 6384 | 0.0003569256 | 146.60 | 0.642 | -2.567 |
| 696 | RPS | 5840 | 0.0003265109 | 137.43 | 0.602 | -2.300 |
| 697 | RPT | 2829 | 0.0001581677 | 146.13 | 0.640 | -2.267 |
| 698 | RPW | 953  | 0.0000532817 | 181.70 | 0.796 | -2.333 |
| 699 | RPY | 1797 | 0.0001004692 | 171.30 | 0.751 | -2.467 |
| 700 | RPV | 3464 | 0.0001936702 | 151.97 | 0.666 | -0.633 |
| 701 | RSA | 5116 | 0.0002860325 | 126.47 | 0.554 | -1.167 |
| 702 | RSR | 7412 | 0.0004144005 | 161.13 | 0.706 | -3.267 |
| 703 | RSN | 2103 | 0.0001175775 | 138.03 | 0.605 | -2.933 |
| 704 | RSD | 2562 | 0.0001432399 | 135.57 | 0.594 | -2.933 |
| 705 | RSC | 1883 | 0.0001052774 | 130.90 | 0.574 | -0.933 |
| 706 | RSQ | 3675 | 0.0002054670 | 146.27 | 0.641 | -2.933 |
| 707 | RSE | 3779 | 0.0002112816 | 143.87 | 0.630 | -2.933 |
| 708 | RSG | 5192 | 0.0002902816 | 118.10 | 0.518 | -1.900 |
| 709 | RSH | 2797 | 0.0001563786 | 149.80 | 0.656 | -2.833 |
| 710 | RSI | 2829 | 0.0001581677 | 151.10 | 0.662 | -0.267 |
| 711 | RSL | 8696 | 0.0004861881 | 151.13 | 0.662 | -0.500 |
| 712 | RSK | 3742 | 0.0002092130 | 152.23 | 0.667 | -3.067 |
| 713 | RSM | 1287 | 0.0000719554 | 152.13 | 0.667 | -1.133 |
| 714 | RSF | 2777 | 0.0001552604 | 160.43 | 0.703 | -0.833 |
| 715 | RSP | 6626 | 0.0003704557 | 137.43 | 0.602 | -2.300 |
| 716 | RSS | 8236 | 0.0004604698 | 128.27 | 0.562 | -2.033 |
| 717 | RST | 3603 | 0.0002014416 | 136.97 | 0.600 | -2.000 |
| 718 | RSW | 1271 | 0.0000710608 | 172.53 | 0.756 | -2.067 |
| 719 | RSY | 1878 | 0.0001049979 | 162.13 | 0.710 | -2.200 |
| 720 | RSV | 4101 | 0.0002292844 | 142.80 | 0.626 | -0.367 |
| 721 | RTA | 3827 | 0.0002139653 | 135.17 | 0.592 | -1.133 |
| 722 | RTR | 3194 | 0.0001785746 | 169.83 | 0.744 | -3.233 |

|     |     |      |              |        |       |        |
|-----|-----|------|--------------|--------|-------|--------|
| 723 | RTN | 1356 | 0.0000758131 | 146.73 | 0.643 | -2.900 |
| 724 | RTD | 1838 | 0.0001027615 | 144.27 | 0.632 | -2.900 |
| 725 | RTC | 1290 | 0.0000721231 | 139.60 | 0.612 | -0.900 |
| 726 | RTQ | 2228 | 0.0001245661 | 154.97 | 0.679 | -2.900 |
| 727 | RTE | 2818 | 0.0001575527 | 152.57 | 0.669 | -2.900 |
| 728 | RTG | 3306 | 0.0001848365 | 126.80 | 0.556 | -1.867 |
| 729 | RTH | 2703 | 0.0001511231 | 158.50 | 0.695 | -2.800 |
| 730 | RTI | 1947 | 0.0001088556 | 159.80 | 0.700 | -0.233 |
| 731 | RTL | 5573 | 0.0003115831 | 159.83 | 0.700 | -0.467 |
| 732 | RTK | 2321 | 0.0001297657 | 160.93 | 0.705 | -3.033 |
| 733 | RTM | 811  | 0.0000453425 | 160.83 | 0.705 | -1.100 |
| 734 | RTF | 1863 | 0.0001041592 | 169.13 | 0.741 | -0.800 |
| 735 | RTP | 4000 | 0.0002236376 | 146.13 | 0.640 | -2.267 |
| 736 | RTS | 4114 | 0.0002300113 | 136.97 | 0.600 | -2.000 |
| 737 | RTT | 2537 | 0.0001418421 | 145.67 | 0.638 | -1.967 |
| 738 | RTW | 741  | 0.0000414289 | 181.23 | 0.794 | -2.033 |
| 739 | RTY | 1175 | 0.0000656935 | 170.83 | 0.749 | -2.167 |
| 740 | RTV | 3380 | 0.0001889738 | 151.50 | 0.664 | -0.333 |
| 741 | RWA | 955  | 0.0000533935 | 170.73 | 0.748 | -1.200 |
| 742 | RWR | 1125 | 0.0000628981 | 205.40 | 0.900 | -3.300 |
| 743 | RWN | 467  | 0.0000261097 | 182.30 | 0.799 | -2.967 |
| 744 | RWD | 537  | 0.0000300233 | 179.83 | 0.788 | -2.967 |
| 745 | RWC | 282  | 0.0000157665 | 175.17 | 0.768 | -0.967 |
| 746 | RWQ | 676  | 0.0000377948 | 190.53 | 0.835 | -2.967 |
| 747 | RWE | 823  | 0.0000460134 | 188.13 | 0.824 | -2.967 |
| 748 | RWG | 911  | 0.0000509335 | 162.37 | 0.712 | -1.933 |
| 749 | RWH | 424  | 0.0000237056 | 194.07 | 0.850 | -2.867 |
| 750 | RWI | 474  | 0.0000265011 | 195.37 | 0.856 | -0.300 |
| 751 | RWL | 1574 | 0.0000880014 | 195.40 | 0.856 | -0.533 |
| 752 | RWK | 918  | 0.0000513248 | 196.50 | 0.861 | -3.100 |
| 753 | RWM | 340  | 0.0000190092 | 196.40 | 0.861 | -1.167 |
| 754 | RWF | 571  | 0.0000319243 | 204.70 | 0.897 | -0.867 |
| 755 | RWP | 714  | 0.0000399193 | 181.70 | 0.796 | -2.333 |
| 756 | RWS | 857  | 0.0000479144 | 172.53 | 0.756 | -2.067 |
| 757 | RWT | 668  | 0.0000373475 | 181.23 | 0.794 | -2.033 |
| 758 | RWW | 284  | 0.0000158783 | 216.80 | 0.950 | -2.100 |
| 759 | RWY | 361  | 0.0000201833 | 206.40 | 0.904 | -2.233 |
| 760 | RWV | 734  | 0.0000410375 | 187.07 | 0.820 | -0.400 |
| 761 | RYA | 1187 | 0.0000663645 | 160.33 | 0.703 | -1.333 |
| 762 | RYR | 1758 | 0.0000982887 | 195.00 | 0.855 | -3.433 |
| 763 | RYN | 853  | 0.0000476907 | 171.90 | 0.753 | -3.100 |
| 764 | RYD | 953  | 0.0000532817 | 169.43 | 0.742 | -3.100 |
| 765 | RYC | 632  | 0.0000353347 | 164.77 | 0.722 | -1.100 |
| 766 | RYQ | 1173 | 0.0000655817 | 180.13 | 0.789 | -3.100 |
| 767 | RYE | 1417 | 0.0000792236 | 177.73 | 0.779 | -3.100 |
| 768 | RYG | 1616 | 0.0000903496 | 151.97 | 0.666 | -2.067 |
| 769 | RYH | 827  | 0.0000462371 | 183.67 | 0.805 | -3.000 |
| 770 | RYI | 1281 | 0.0000716199 | 184.97 | 0.811 | -0.433 |
| 771 | RYL | 2908 | 0.0001625845 | 185.00 | 0.811 | -0.667 |
| 772 | RYK | 1231 | 0.0000688245 | 186.10 | 0.816 | -3.233 |
| 773 | RYM | 507  | 0.0000283461 | 186.00 | 0.815 | -1.300 |
| 774 | RYF | 1205 | 0.0000673708 | 194.30 | 0.851 | -1.000 |

|     |     |      |              |        |       |        |
|-----|-----|------|--------------|--------|-------|--------|
| 775 | RYP | 1252 | 0.0000699986 | 171.30 | 0.751 | -2.467 |
| 776 | RYS | 1907 | 0.0001066192 | 162.13 | 0.710 | -2.200 |
| 777 | RYT | 1157 | 0.0000646872 | 170.83 | 0.749 | -2.167 |
| 778 | RYW | 374  | 0.0000209101 | 206.40 | 0.904 | -2.233 |
| 779 | RYY | 880  | 0.0000492003 | 196.00 | 0.859 | -2.367 |
| 780 | RYV | 1401 | 0.0000783291 | 176.67 | 0.774 | -0.533 |
| 781 | RVA | 4254 | 0.0002378386 | 141.00 | 0.618 | 0.500  |
| 782 | RVR | 4010 | 0.0002241967 | 175.67 | 0.770 | -1.600 |
| 783 | RVN | 1743 | 0.0000974501 | 152.57 | 0.669 | -1.267 |
| 784 | RVD | 2215 | 0.0001238393 | 150.10 | 0.658 | -1.267 |
| 785 | RVC | 1435 | 0.0000802300 | 145.43 | 0.637 | 0.733  |
| 786 | RVQ | 2708 | 0.0001514027 | 160.80 | 0.705 | -1.267 |
| 787 | RVE | 3331 | 0.0001862342 | 158.40 | 0.694 | -1.267 |
| 788 | RVG | 3535 | 0.0001976397 | 132.63 | 0.581 | -0.233 |
| 789 | RVH | 2449 | 0.0001369221 | 164.33 | 0.720 | -1.167 |
| 790 | RVI | 2480 | 0.0001386553 | 165.63 | 0.726 | 1.400  |
| 791 | RVL | 6993 | 0.0003909744 | 165.67 | 0.726 | 1.167  |
| 792 | RVK | 3127 | 0.0001748287 | 166.77 | 0.731 | -1.400 |
| 793 | RVM | 1074 | 0.0000600467 | 166.67 | 0.730 | 0.533  |
| 794 | RVF | 2262 | 0.0001264671 | 174.97 | 0.767 | 0.833  |
| 795 | RVP | 3766 | 0.0002105548 | 151.97 | 0.666 | -0.633 |
| 796 | RVS | 4318 | 0.0002414168 | 142.80 | 0.626 | -0.367 |
| 797 | RVT | 3366 | 0.0001881910 | 151.50 | 0.664 | -0.333 |
| 798 | RVW | 834  | 0.0000466284 | 187.07 | 0.820 | -0.400 |
| 799 | RVY | 1513 | 0.0000845909 | 176.67 | 0.774 | -0.533 |
| 800 | RVV | 3679 | 0.0002056907 | 157.33 | 0.689 | 1.300  |
| 801 | NAA | 2791 | 0.0001560431 | 101.57 | 0.445 | 0.033  |
| 802 | NAR | 1717 | 0.0000959964 | 136.23 | 0.597 | -2.067 |
| 803 | NAN | 1243 | 0.0000694954 | 113.13 | 0.496 | -1.733 |
| 804 | NAD | 1561 | 0.0000872746 | 110.67 | 0.485 | -1.733 |
| 805 | NAC | 691  | 0.0000386334 | 106.00 | 0.465 | 0.267  |
| 806 | NAQ | 1476 | 0.0000825223 | 121.37 | 0.532 | -1.733 |
| 807 | NAE | 2289 | 0.0001279766 | 118.97 | 0.521 | -1.733 |
| 808 | NAG | 1946 | 0.0001087997 | 93.20  | 0.408 | -0.700 |
| 809 | NAH | 807  | 0.0000451189 | 124.90 | 0.547 | -1.633 |
| 810 | NAI | 1901 | 0.0001062838 | 126.20 | 0.553 | 0.933  |
| 811 | NAL | 3461 | 0.0001935024 | 126.23 | 0.553 | 0.700  |
| 812 | NAK | 1898 | 0.0001061160 | 127.33 | 0.558 | -1.867 |
| 813 | NAM | 702  | 0.0000392484 | 127.23 | 0.558 | 0.067  |
| 814 | NAF | 1425 | 0.0000796709 | 135.53 | 0.594 | 0.367  |
| 815 | NAP | 1930 | 0.0001079051 | 112.53 | 0.493 | -1.100 |
| 816 | NAS | 3273 | 0.0001829915 | 103.37 | 0.453 | -0.833 |
| 817 | NAT | 2384 | 0.0001332880 | 112.07 | 0.491 | -0.800 |
| 818 | NAW | 481  | 0.0000268924 | 147.63 | 0.647 | -0.867 |
| 819 | NAY | 917  | 0.0000512689 | 137.23 | 0.601 | -1.000 |
| 820 | NAV | 2446 | 0.0001367544 | 117.90 | 0.517 | 0.833  |
| 821 | NRA | 1915 | 0.0001070665 | 136.23 | 0.597 | -2.067 |
| 822 | NRR | 2306 | 0.0001289271 | 170.90 | 0.749 | -4.167 |
| 823 | NRN | 1345 | 0.0000751981 | 147.80 | 0.648 | -3.833 |
| 824 | NRD | 1414 | 0.0000790559 | 145.33 | 0.637 | -3.833 |
| 825 | NRC | 711  | 0.0000397516 | 140.67 | 0.616 | -1.833 |
| 826 | NRQ | 1481 | 0.0000828018 | 156.03 | 0.684 | -3.833 |



|     |     |      |              |        |       |        |
|-----|-----|------|--------------|--------|-------|--------|
| 827 | NRE | 2073 | 0.0001159002 | 153.63 | 0.673 | -3.833 |
| 828 | NRG | 1741 | 0.0000973383 | 127.87 | 0.560 | -2.800 |
| 829 | NRH | 902  | 0.0000504303 | 159.57 | 0.699 | -3.733 |
| 830 | NRI | 1791 | 0.0001001337 | 160.87 | 0.705 | -1.167 |
| 831 | NRL | 3062 | 0.0001711946 | 160.90 | 0.705 | -1.400 |
| 832 | NRK | 1951 | 0.0001090792 | 162.00 | 0.710 | -3.967 |
| 833 | NRM | 781  | 0.0000436652 | 161.90 | 0.709 | -2.033 |
| 834 | NRF | 1313 | 0.0000734090 | 170.20 | 0.746 | -1.733 |
| 835 | NRP | 1610 | 0.0000900141 | 147.20 | 0.645 | -3.200 |
| 836 | NRS | 2415 | 0.0001350212 | 138.03 | 0.605 | -2.933 |
| 837 | NRT | 1996 | 0.0001115952 | 146.73 | 0.643 | -2.900 |
| 838 | NRW | 376  | 0.0000210219 | 182.30 | 0.799 | -2.967 |
| 839 | NRY | 949  | 0.0000530580 | 171.90 | 0.753 | -3.100 |
| 840 | NRV | 1872 | 0.0001046624 | 152.57 | 0.669 | -1.267 |
| 841 | NNA | 1262 | 0.0000705577 | 113.13 | 0.496 | -1.733 |
| 842 | NNR | 1261 | 0.0000705018 | 147.80 | 0.648 | -3.833 |
| 843 | NNN | 1359 | 0.0000759809 | 124.70 | 0.546 | -3.500 |
| 844 | NND | 893  | 0.0000499271 | 122.23 | 0.536 | -3.500 |
| 845 | NNC | 587  | 0.0000328188 | 117.57 | 0.515 | -1.500 |
| 846 | NNQ | 1223 | 0.0000683772 | 132.93 | 0.583 | -3.500 |
| 847 | NNE | 1391 | 0.0000777700 | 130.53 | 0.572 | -3.500 |
| 848 | NNG | 1387 | 0.0000775463 | 104.77 | 0.459 | -2.467 |
| 849 | NNH | 673  | 0.0000376270 | 136.47 | 0.598 | -3.400 |
| 850 | NNI | 1542 | 0.0000862123 | 137.77 | 0.604 | -0.833 |
| 851 | NNL | 2686 | 0.0001501727 | 137.80 | 0.604 | -1.067 |
| 852 | NNK | 1457 | 0.0000814600 | 138.90 | 0.609 | -3.633 |
| 853 | NNM | 697  | 0.0000389689 | 138.80 | 0.608 | -1.700 |
| 854 | NNF | 1196 | 0.0000668676 | 147.10 | 0.645 | -1.400 |
| 855 | NNP | 1518 | 0.0000848705 | 124.10 | 0.544 | -2.867 |
| 856 | NNS | 2270 | 0.0001269143 | 114.93 | 0.504 | -2.600 |
| 857 | NNT | 1438 | 0.0000803977 | 123.63 | 0.542 | -2.567 |
| 858 | NNW | 330  | 0.0000184501 | 159.20 | 0.698 | -2.633 |
| 859 | NNY | 853  | 0.0000476907 | 148.80 | 0.652 | -2.767 |
| 860 | NNV | 1455 | 0.0000813482 | 129.47 | 0.567 | -0.933 |
| 861 | NDA | 1255 | 0.0000701663 | 110.67 | 0.485 | -1.733 |
| 862 | NDR | 1129 | 0.0000631217 | 145.33 | 0.637 | -3.833 |
| 863 | NDN | 1756 | 0.0000981769 | 122.23 | 0.536 | -3.500 |
| 864 | NDD | 1250 | 0.0000698868 | 119.77 | 0.525 | -3.500 |
| 865 | NDC | 703  | 0.0000393043 | 115.10 | 0.504 | -1.500 |
| 866 | NDQ | 878  | 0.0000490885 | 130.47 | 0.572 | -3.500 |
| 867 | NDE | 1445 | 0.0000807891 | 128.07 | 0.561 | -3.500 |
| 868 | NDG | 1382 | 0.0000772668 | 102.30 | 0.448 | -2.467 |
| 869 | NDH | 688  | 0.0000384657 | 134.00 | 0.587 | -3.400 |
| 870 | NDI | 1587 | 0.0000887282 | 135.30 | 0.593 | -0.833 |
| 871 | NDL | 2636 | 0.0001473772 | 135.33 | 0.593 | -1.067 |
| 872 | NDK | 1235 | 0.0000690481 | 136.43 | 0.598 | -3.633 |
| 873 | NDM | 551  | 0.0000308061 | 136.33 | 0.597 | -1.700 |
| 874 | NDF | 1223 | 0.0000683772 | 144.63 | 0.634 | -1.400 |
| 875 | NDP | 1398 | 0.0000781613 | 121.63 | 0.533 | -2.867 |
| 876 | NDS | 2031 | 0.0001135520 | 112.47 | 0.493 | -2.600 |
| 877 | NDT | 1546 | 0.0000864359 | 121.17 | 0.531 | -2.567 |
| 878 | NDW | 321  | 0.0000179469 | 156.73 | 0.687 | -2.633 |

|     |     |      |              |        |       |        |
|-----|-----|------|--------------|--------|-------|--------|
| 879 | NDY | 812  | 0.0000453984 | 146.33 | 0.641 | -2.767 |
| 880 | NDV | 1591 | 0.0000889519 | 127.00 | 0.557 | -0.933 |
| 881 | NCA | 684  | 0.0000382420 | 106.00 | 0.465 | 0.267  |
| 882 | NCR | 736  | 0.0000411493 | 140.67 | 0.616 | -1.833 |
| 883 | NCN | 566  | 0.0000316447 | 117.57 | 0.515 | -1.500 |
| 884 | NCD | 584  | 0.0000326511 | 115.10 | 0.504 | -1.500 |
| 885 | NCC | 445  | 0.0000248797 | 110.43 | 0.484 | 0.500  |
| 886 | NCQ | 656  | 0.0000366766 | 125.80 | 0.551 | -1.500 |
| 887 | NCE | 857  | 0.0000479144 | 123.40 | 0.541 | -1.500 |
| 888 | NCG | 972  | 0.0000543439 | 97.63  | 0.428 | -0.467 |
| 889 | NCH | 406  | 0.0000226992 | 129.33 | 0.567 | -1.400 |
| 890 | NCI | 748  | 0.0000418202 | 130.63 | 0.572 | 1.167  |
| 891 | NCL | 1365 | 0.0000763163 | 130.67 | 0.573 | 0.933  |
| 892 | NCK | 740  | 0.0000413730 | 131.77 | 0.577 | -1.633 |
| 893 | NCM | 251  | 0.0000140333 | 131.67 | 0.577 | 0.300  |
| 894 | NCF | 536  | 0.0000299674 | 139.97 | 0.613 | 0.600  |
| 895 | NCP | 832  | 0.0000465166 | 116.97 | 0.513 | -0.867 |
| 896 | NCS | 1775 | 0.0000992392 | 107.80 | 0.472 | -0.600 |
| 897 | NCT | 1064 | 0.0000594876 | 116.50 | 0.511 | -0.567 |
| 898 | NCW | 199  | 0.0000111260 | 152.07 | 0.666 | -0.633 |
| 899 | NCY | 413  | 0.0000230906 | 141.67 | 0.621 | -0.767 |
| 900 | NCV | 918  | 0.0000513248 | 122.33 | 0.536 | 1.067  |
| 901 | NQA | 1603 | 0.0000896228 | 121.37 | 0.532 | -1.733 |
| 902 | NQR | 1400 | 0.0000782732 | 156.03 | 0.684 | -3.833 |
| 903 | NQN | 1254 | 0.0000701104 | 132.93 | 0.583 | -3.500 |
| 904 | NQD | 1319 | 0.0000737445 | 130.47 | 0.572 | -3.500 |
| 905 | NQC | 640  | 0.0000357820 | 125.80 | 0.551 | -1.500 |
| 906 | NQQ | 1519 | 0.0000849264 | 141.17 | 0.619 | -3.500 |
| 907 | NQE | 2308 | 0.0001290389 | 138.77 | 0.608 | -3.500 |
| 908 | NQG | 1531 | 0.0000855973 | 113.00 | 0.495 | -2.467 |
| 909 | NQH | 740  | 0.0000413730 | 144.70 | 0.634 | -3.400 |
| 910 | NQI | 1460 | 0.0000816277 | 146.00 | 0.640 | -0.833 |
| 911 | NQL | 2882 | 0.0001611309 | 146.03 | 0.640 | -1.067 |
| 912 | NQK | 1658 | 0.0000926978 | 147.13 | 0.645 | -3.633 |
| 913 | NQM | 667  | 0.0000372916 | 147.03 | 0.644 | -1.700 |
| 914 | NQF | 946  | 0.0000528903 | 155.33 | 0.681 | -1.400 |
| 915 | NQP | 1502 | 0.0000839759 | 132.33 | 0.580 | -2.867 |
| 916 | NQS | 2115 | 0.0001182484 | 123.17 | 0.540 | -2.600 |
| 917 | NQT | 1712 | 0.0000957169 | 131.87 | 0.578 | -2.567 |
| 918 | NQW | 370  | 0.0000206865 | 167.43 | 0.734 | -2.633 |
| 919 | NQY | 693  | 0.0000387452 | 157.03 | 0.688 | -2.767 |
| 920 | NQV | 1657 | 0.0000926419 | 137.70 | 0.603 | -0.933 |
| 921 | NEA | 2401 | 0.0001342385 | 118.97 | 0.521 | -1.733 |
| 922 | NER | 1748 | 0.0000977296 | 153.63 | 0.673 | -3.833 |
| 923 | NEN | 1869 | 0.0001044947 | 130.53 | 0.572 | -3.500 |
| 924 | NED | 2875 | 0.0001607395 | 128.07 | 0.561 | -3.500 |
| 925 | NEC | 1841 | 0.0001029292 | 123.40 | 0.541 | -1.500 |
| 926 | NEQ | 1278 | 0.0000714522 | 138.77 | 0.608 | -3.500 |
| 927 | NEE | 3510 | 0.0001962420 | 136.37 | 0.598 | -3.500 |
| 928 | NEG | 1899 | 0.0001061720 | 110.60 | 0.485 | -2.467 |
| 929 | NEH | 789  | 0.0000441125 | 142.30 | 0.624 | -3.400 |
| 930 | NEI | 2094 | 0.0001170743 | 143.60 | 0.629 | -0.833 |

|     |     |      |              |        |       |        |
|-----|-----|------|--------------|--------|-------|--------|
| 931 | NEL | 3397 | 0.0001899242 | 143.63 | 0.629 | -1.067 |
| 932 | NEK | 2720 | 0.0001520736 | 144.73 | 0.634 | -3.633 |
| 933 | NEM | 1001 | 0.0000559653 | 144.63 | 0.634 | -1.700 |
| 934 | NEF | 1332 | 0.0000744713 | 152.93 | 0.670 | -1.400 |
| 935 | NEP | 1318 | 0.0000736886 | 129.93 | 0.569 | -2.867 |
| 936 | NES | 2199 | 0.0001229448 | 120.77 | 0.529 | -2.600 |
| 937 | NET | 2077 | 0.0001161238 | 129.47 | 0.567 | -2.567 |
| 938 | NEW | 443  | 0.0000247679 | 165.03 | 0.723 | -2.633 |
| 939 | NEY | 1068 | 0.0000597112 | 154.63 | 0.678 | -2.767 |
| 940 | NEV | 2526 | 0.0001412271 | 135.30 | 0.593 | -0.933 |
| 941 | NGA | 2396 | 0.0001339589 | 93.20  | 0.408 | -0.700 |
| 942 | NGR | 2201 | 0.0001230566 | 127.87 | 0.560 | -2.800 |
| 943 | NGN | 1907 | 0.0001066192 | 104.77 | 0.459 | -2.467 |
| 944 | NGD | 2223 | 0.0001242866 | 102.30 | 0.448 | -2.467 |
| 945 | NGC | 692  | 0.0000386893 | 97.63  | 0.428 | -0.467 |
| 946 | NGQ | 2090 | 0.0001168506 | 113.00 | 0.495 | -2.467 |
| 947 | NGE | 2860 | 0.0001599009 | 110.60 | 0.485 | -2.467 |
| 948 | NGG | 2837 | 0.0001586150 | 84.83  | 0.372 | -1.433 |
| 949 | NGH | 1385 | 0.0000774345 | 116.53 | 0.511 | -2.367 |
| 950 | NGI | 2134 | 0.0001193107 | 117.83 | 0.516 | 0.200  |
| 951 | NGL | 3549 | 0.0001984225 | 117.87 | 0.517 | -0.033 |
| 952 | NGK | 2684 | 0.0001500608 | 118.97 | 0.521 | -2.600 |
| 953 | NGM | 869  | 0.0000485853 | 118.87 | 0.521 | -0.667 |
| 954 | NGF | 1525 | 0.0000852618 | 127.17 | 0.557 | -0.367 |
| 955 | NGP | 1699 | 0.0000949901 | 104.17 | 0.456 | -1.833 |
| 956 | NGS | 3844 | 0.0002149157 | 95.00  | 0.416 | -1.567 |
| 957 | NGT | 3152 | 0.0001762264 | 103.70 | 0.454 | -1.533 |
| 958 | NGW | 488  | 0.0000272838 | 139.27 | 0.610 | -1.600 |
| 959 | NGY | 1178 | 0.0000658613 | 128.87 | 0.565 | -1.733 |
| 960 | NGV | 2441 | 0.0001364748 | 109.53 | 0.480 | 0.100  |
| 961 | NHA | 726  | 0.0000405902 | 124.90 | 0.547 | -1.633 |
| 962 | NHR | 983  | 0.0000549589 | 159.57 | 0.699 | -3.733 |
| 963 | NHN | 628  | 0.0000351111 | 136.47 | 0.598 | -3.400 |
| 964 | NHD | 592  | 0.0000330984 | 134.00 | 0.587 | -3.400 |
| 965 | NHC | 397  | 0.0000221960 | 129.33 | 0.567 | -1.400 |
| 966 | NHQ | 826  | 0.0000461812 | 144.70 | 0.634 | -3.400 |
| 967 | NHE | 832  | 0.0000465166 | 142.30 | 0.624 | -3.400 |
| 968 | NHG | 779  | 0.0000435534 | 116.53 | 0.511 | -2.367 |
| 969 | NHH | 598  | 0.0000334338 | 148.23 | 0.650 | -3.300 |
| 970 | NHI | 916  | 0.0000512130 | 149.53 | 0.655 | -0.733 |
| 971 | NHL | 1832 | 0.0001024260 | 149.57 | 0.655 | -0.967 |
| 972 | NHK | 864  | 0.0000483057 | 150.67 | 0.660 | -3.533 |
| 973 | NHM | 389  | 0.0000217488 | 150.57 | 0.660 | -1.600 |
| 974 | NHF | 793  | 0.0000443362 | 158.87 | 0.696 | -1.300 |
| 975 | NHP | 1120 | 0.0000626185 | 135.87 | 0.595 | -2.767 |
| 976 | NHS | 1545 | 0.0000863800 | 126.70 | 0.555 | -2.500 |
| 977 | NHT | 1100 | 0.0000615003 | 135.40 | 0.593 | -2.467 |
| 978 | NHW | 231  | 0.0000129151 | 170.97 | 0.749 | -2.533 |
| 979 | NHY | 524  | 0.0000292965 | 160.57 | 0.704 | -2.667 |
| 980 | NHV | 1009 | 0.0000564126 | 141.23 | 0.619 | -0.833 |
| 981 | NIA | 1764 | 0.0000986242 | 126.20 | 0.553 | 0.933  |
| 982 | NIR | 1719 | 0.0000961083 | 160.87 | 0.705 | -1.167 |

|      |     |      |              |        |       |        |
|------|-----|------|--------------|--------|-------|--------|
| 983  | NIN | 1433 | 0.0000801182 | 137.77 | 0.604 | -0.833 |
| 984  | NID | 1490 | 0.0000833050 | 135.30 | 0.593 | -0.833 |
| 985  | NIC | 848  | 0.0000474112 | 130.63 | 0.572 | 1.167  |
| 986  | NIQ | 1871 | 0.0001046065 | 146.00 | 0.640 | -0.833 |
| 987  | NIE | 1863 | 0.0001041592 | 143.60 | 0.629 | -0.833 |
| 988  | NIG | 1347 | 0.0000753100 | 117.83 | 0.516 | 0.200  |
| 989  | NIH | 1017 | 0.0000568599 | 149.53 | 0.655 | -0.733 |
| 990  | NII | 2085 | 0.0001165711 | 150.83 | 0.661 | 1.833  |
| 991  | NIL | 3957 | 0.0002212335 | 150.87 | 0.661 | 1.600  |
| 992  | NIK | 2032 | 0.0001136079 | 151.97 | 0.666 | -0.967 |
| 993  | NIM | 790  | 0.0000441684 | 151.87 | 0.665 | 0.967  |
| 994  | NIF | 1722 | 0.0000962760 | 160.17 | 0.702 | 1.267  |
| 995  | NIP | 2146 | 0.0001199816 | 137.17 | 0.601 | -0.200 |
| 996  | NIS | 3161 | 0.0001767296 | 128.00 | 0.561 | 0.067  |
| 997  | NIT | 2709 | 0.0001514586 | 136.70 | 0.599 | 0.100  |
| 998  | NIW | 392  | 0.0000219165 | 172.27 | 0.755 | 0.033  |
| 999  | NIY | 1081 | 0.0000604381 | 161.87 | 0.709 | -0.100 |
| 1000 | NIV | 2124 | 0.0001187516 | 142.53 | 0.625 | 1.733  |
| 1001 | NLA | 4057 | 0.0002268244 | 126.23 | 0.553 | 0.700  |
| 1002 | NLR | 3309 | 0.0001850042 | 160.90 | 0.705 | -1.400 |
| 1003 | NLN | 2627 | 0.0001468740 | 137.80 | 0.604 | -1.067 |
| 1004 | NLD | 2833 | 0.0001583913 | 135.33 | 0.593 | -1.067 |
| 1005 | NLC | 1262 | 0.0000705577 | 130.67 | 0.573 | 0.933  |
| 1006 | NLQ | 3621 | 0.0002024479 | 146.03 | 0.640 | -1.067 |
| 1007 | NLE | 4210 | 0.0002353786 | 143.63 | 0.629 | -1.067 |
| 1008 | NLG | 3273 | 0.0001829915 | 117.87 | 0.517 | -0.033 |
| 1009 | NLH | 1585 | 0.0000886164 | 149.57 | 0.655 | -0.967 |
| 1010 | NLI | 3065 | 0.0001713623 | 150.87 | 0.661 | 1.600  |
| 1011 | NLL | 6601 | 0.0003690580 | 150.90 | 0.661 | 1.367  |
| 1012 | NLK | 3946 | 0.0002206185 | 152.00 | 0.666 | -1.200 |
| 1013 | NLM | 1211 | 0.0000677063 | 151.90 | 0.666 | 0.733  |
| 1014 | NLF | 2262 | 0.0001264671 | 160.20 | 0.702 | 1.033  |
| 1015 | NLP | 3633 | 0.0002031188 | 137.20 | 0.601 | -0.433 |
| 1016 | NLS | 5554 | 0.0003105208 | 128.03 | 0.561 | -0.167 |
| 1017 | NLT | 4404 | 0.0002462250 | 136.73 | 0.599 | -0.133 |
| 1018 | NLW | 638  | 0.0000356702 | 172.30 | 0.755 | -0.200 |
| 1019 | NLY | 1977 | 0.0001105329 | 161.90 | 0.709 | -0.333 |
| 1020 | NLV | 3759 | 0.0002101634 | 142.57 | 0.625 | 1.500  |
| 1021 | NKA | 2358 | 0.0001318344 | 127.33 | 0.558 | -1.867 |
| 1022 | NKR | 1843 | 0.0001030410 | 162.00 | 0.710 | -3.967 |
| 1023 | NKN | 1614 | 0.0000902378 | 138.90 | 0.609 | -3.633 |
| 1024 | NKD | 2277 | 0.0001273057 | 136.43 | 0.598 | -3.633 |
| 1025 | NKC | 920  | 0.0000514366 | 131.77 | 0.577 | -1.633 |
| 1026 | NKQ | 1519 | 0.0000849264 | 147.13 | 0.645 | -3.633 |
| 1027 | NKE | 3065 | 0.0001713623 | 144.73 | 0.634 | -3.633 |
| 1028 | NKG | 1743 | 0.0000974501 | 118.97 | 0.521 | -2.600 |
| 1029 | NKH | 1048 | 0.0000585931 | 150.67 | 0.660 | -3.533 |
| 1030 | NKI | 2182 | 0.0001219943 | 151.97 | 0.666 | -0.967 |
| 1031 | NKL | 3357 | 0.0001876879 | 152.00 | 0.666 | -1.200 |
| 1032 | NKK | 2856 | 0.0001596772 | 153.10 | 0.671 | -3.767 |
| 1033 | NKM | 964  | 0.0000538967 | 153.00 | 0.670 | -1.833 |
| 1034 | NKF | 1248 | 0.0000697749 | 161.30 | 0.707 | -1.533 |

|      |     |      |              |        |       |        |
|------|-----|------|--------------|--------|-------|--------|
| 1035 | NKP | 1862 | 0.0001041033 | 138.30 | 0.606 | -3.000 |
| 1036 | NKS | 2359 | 0.0001318903 | 129.13 | 0.566 | -2.733 |
| 1037 | NKT | 2152 | 0.0001203170 | 137.83 | 0.604 | -2.700 |
| 1038 | NKW | 427  | 0.0000238733 | 173.40 | 0.760 | -2.767 |
| 1039 | NKY | 1095 | 0.0000612208 | 163.00 | 0.714 | -2.900 |
| 1040 | NKV | 2235 | 0.0001249575 | 143.67 | 0.630 | -1.067 |
| 1041 | NMA | 964  | 0.0000538967 | 127.23 | 0.558 | 0.067  |
| 1042 | NMR | 575  | 0.0000321479 | 161.90 | 0.709 | -2.033 |
| 1043 | NMN | 757  | 0.0000423234 | 138.80 | 0.608 | -1.700 |
| 1044 | NMD | 833  | 0.0000465725 | 136.33 | 0.597 | -1.700 |
| 1045 | NMC | 247  | 0.0000138096 | 131.67 | 0.577 | 0.300  |
| 1046 | NMQ | 550  | 0.0000307502 | 147.03 | 0.644 | -1.700 |
| 1047 | NME | 1106 | 0.0000618358 | 144.63 | 0.634 | -1.700 |
| 1048 | NMG | 821  | 0.0000459016 | 118.87 | 0.521 | -0.667 |
| 1049 | NMH | 315  | 0.0000176115 | 150.57 | 0.660 | -1.600 |
| 1050 | NMI | 589  | 0.0000329306 | 151.87 | 0.665 | 0.967  |
| 1051 | NML | 1390 | 0.0000777141 | 151.90 | 0.666 | 0.733  |
| 1052 | NMK | 997  | 0.0000557417 | 153.00 | 0.670 | -1.833 |
| 1053 | NMM | 356  | 0.0000199037 | 152.90 | 0.670 | 0.100  |
| 1054 | NMF | 514  | 0.0000287374 | 161.20 | 0.706 | 0.400  |
| 1055 | NMP | 735  | 0.0000410934 | 138.20 | 0.606 | -1.067 |
| 1056 | NMS | 1004 | 0.0000561330 | 129.03 | 0.565 | -0.800 |
| 1057 | NMT | 889  | 0.0000497035 | 137.73 | 0.604 | -0.767 |
| 1058 | NMW | 164  | 0.0000091691 | 173.30 | 0.759 | -0.833 |
| 1059 | NMY | 436  | 0.0000243765 | 162.90 | 0.714 | -0.967 |
| 1060 | NMV | 913  | 0.0000510453 | 143.57 | 0.629 | 0.867  |
| 1061 | NFA | 1257 | 0.0000702781 | 135.53 | 0.594 | 0.367  |
| 1062 | NFR | 1316 | 0.0000735768 | 170.20 | 0.746 | -1.733 |
| 1063 | NFN | 1074 | 0.0000600467 | 147.10 | 0.645 | -1.400 |
| 1064 | NFD | 1376 | 0.0000769313 | 144.63 | 0.634 | -1.400 |
| 1065 | NFC | 578  | 0.0000323156 | 139.97 | 0.613 | 0.600  |
| 1066 | NFQ | 1182 | 0.0000660849 | 155.33 | 0.681 | -1.400 |
| 1067 | NFE | 1303 | 0.0000728500 | 152.93 | 0.670 | -1.400 |
| 1068 | NFG | 1204 | 0.0000673149 | 127.17 | 0.557 | -0.367 |
| 1069 | NFH | 713  | 0.0000398634 | 158.87 | 0.696 | -1.300 |
| 1070 | NFI | 1316 | 0.0000735768 | 160.17 | 0.702 | 1.267  |
| 1071 | NFL | 2721 | 0.0001521295 | 160.20 | 0.702 | 1.033  |
| 1072 | NFK | 1219 | 0.0000681536 | 161.30 | 0.707 | -1.533 |
| 1073 | NFM | 477  | 0.0000266688 | 161.20 | 0.706 | 0.400  |
| 1074 | NFF | 1108 | 0.0000619476 | 169.50 | 0.743 | 0.700  |
| 1075 | NFP | 1322 | 0.0000739122 | 146.50 | 0.642 | -0.767 |
| 1076 | NFS | 2661 | 0.0001487749 | 137.33 | 0.602 | -0.500 |
| 1077 | NFT | 1727 | 0.0000965555 | 146.03 | 0.640 | -0.467 |
| 1078 | NFW | 319  | 0.0000178351 | 181.60 | 0.796 | -0.533 |
| 1079 | NFY | 736  | 0.0000411493 | 171.20 | 0.750 | -0.667 |
| 1080 | NFV | 1350 | 0.0000754777 | 151.87 | 0.665 | 1.167  |
| 1081 | NPA | 2603 | 0.0001455322 | 112.53 | 0.493 | -1.100 |
| 1082 | NPR | 1911 | 0.0001068429 | 147.20 | 0.645 | -3.200 |
| 1083 | NPN | 1701 | 0.0000951019 | 124.10 | 0.544 | -2.867 |
| 1084 | NPD | 2178 | 0.0001217707 | 121.63 | 0.533 | -2.867 |
| 1085 | NPC | 803  | 0.0000448952 | 116.97 | 0.513 | -0.867 |
| 1086 | NPQ | 1733 | 0.0000968910 | 132.33 | 0.580 | -2.867 |

|      |     |      |              |        |       |        |
|------|-----|------|--------------|--------|-------|--------|
| 1087 | NPE | 3006 | 0.0001680637 | 129.93 | 0.569 | -2.867 |
| 1088 | NPG | 2528 | 0.0001413390 | 104.17 | 0.456 | -1.833 |
| 1089 | NPH | 981  | 0.0000548471 | 135.87 | 0.595 | -2.767 |
| 1090 | NPI | 1488 | 0.0000831932 | 137.17 | 0.601 | -0.200 |
| 1091 | NPL | 3017 | 0.0001686787 | 137.20 | 0.601 | -0.433 |
| 1092 | NPK | 2039 | 0.0001139993 | 138.30 | 0.606 | -3.000 |
| 1093 | NPM | 727  | 0.0000406461 | 138.20 | 0.606 | -1.067 |
| 1094 | NPF | 1544 | 0.0000863241 | 146.50 | 0.642 | -0.767 |
| 1095 | NPP | 2576 | 0.0001440226 | 123.50 | 0.541 | -2.233 |
| 1096 | NPS | 3063 | 0.0001712505 | 114.33 | 0.501 | -1.967 |
| 1097 | NPT | 1883 | 0.0001052774 | 123.03 | 0.539 | -1.933 |
| 1098 | NPW | 570  | 0.0000318684 | 158.60 | 0.695 | -2.000 |
| 1099 | NPY | 1222 | 0.0000683213 | 148.20 | 0.649 | -2.133 |
| 1100 | NPV | 2278 | 0.0001273616 | 128.87 | 0.565 | -0.300 |
| 1101 | NSA | 3040 | 0.0001699646 | 103.37 | 0.453 | -0.833 |
| 1102 | NSR | 2594 | 0.0001450290 | 138.03 | 0.605 | -2.933 |
| 1103 | NSN | 2375 | 0.0001327848 | 114.93 | 0.504 | -2.600 |
| 1104 | NSD | 2419 | 0.0001352448 | 112.47 | 0.493 | -2.600 |
| 1105 | NSC | 1105 | 0.0000617799 | 107.80 | 0.472 | -0.600 |
| 1106 | NSQ | 2408 | 0.0001346298 | 123.17 | 0.540 | -2.600 |
| 1107 | NSE | 3159 | 0.0001766178 | 120.77 | 0.529 | -2.600 |
| 1108 | NSG | 3065 | 0.0001713623 | 95.00  | 0.416 | -1.567 |
| 1109 | NSH | 1471 | 0.0000822427 | 126.70 | 0.555 | -2.500 |
| 1110 | NSI | 2644 | 0.0001478245 | 128.00 | 0.561 | 0.067  |
| 1111 | NSL | 5202 | 0.0002908407 | 128.03 | 0.561 | -0.167 |
| 1112 | NSK | 2785 | 0.0001557077 | 129.13 | 0.566 | -2.733 |
| 1113 | NSM | 1050 | 0.0000587049 | 129.03 | 0.565 | -0.800 |
| 1114 | NSF | 2072 | 0.0001158443 | 137.33 | 0.602 | -0.500 |
| 1115 | NSP | 3126 | 0.0001747728 | 114.33 | 0.501 | -1.967 |
| 1116 | NSS | 6595 | 0.0003687225 | 105.17 | 0.461 | -1.700 |
| 1117 | NST | 3515 | 0.0001965215 | 113.87 | 0.499 | -1.667 |
| 1118 | NSW | 730  | 0.0000408139 | 149.43 | 0.655 | -1.733 |
| 1119 | NSY | 1298 | 0.0000725704 | 139.03 | 0.609 | -1.867 |
| 1120 | NSV | 3185 | 0.0001780714 | 119.70 | 0.525 | -0.033 |
| 1121 | NTA | 2461 | 0.0001375930 | 112.07 | 0.491 | -0.800 |
| 1122 | NTR | 1447 | 0.0000809009 | 146.73 | 0.643 | -2.900 |
| 1123 | NTN | 1299 | 0.0000726263 | 123.63 | 0.542 | -2.567 |
| 1124 | NTD | 1585 | 0.0000886164 | 121.17 | 0.531 | -2.567 |
| 1125 | NTC | 788  | 0.0000440566 | 116.50 | 0.511 | -0.567 |
| 1126 | NTQ | 1318 | 0.0000736886 | 131.87 | 0.578 | -2.567 |
| 1127 | NTE | 2259 | 0.0001262993 | 129.47 | 0.567 | -2.567 |
| 1128 | NTG | 2019 | 0.0001128811 | 103.70 | 0.454 | -1.533 |
| 1129 | NTH | 847  | 0.0000473553 | 135.40 | 0.593 | -2.467 |
| 1130 | NTI | 1590 | 0.0000888959 | 136.70 | 0.599 | 0.100  |
| 1131 | NTL | 3163 | 0.0001768414 | 136.73 | 0.599 | -0.133 |
| 1132 | NTK | 1726 | 0.0000964996 | 137.83 | 0.604 | -2.700 |
| 1133 | NTM | 700  | 0.0000391366 | 137.73 | 0.604 | -0.767 |
| 1134 | NTF | 1426 | 0.0000797268 | 146.03 | 0.640 | -0.467 |
| 1135 | NTP | 1931 | 0.0001079611 | 123.03 | 0.539 | -1.933 |
| 1136 | NTS | 2969 | 0.0001659950 | 113.87 | 0.499 | -1.667 |
| 1137 | NTT | 2305 | 0.0001288712 | 122.57 | 0.537 | -1.633 |
| 1138 | NTW | 422  | 0.0000235938 | 158.13 | 0.693 | -1.700 |

|      |      |      |              |        |       |        |
|------|------|------|--------------|--------|-------|--------|
| 1139 | NTY  | 1057 | 0.0000590962 | 147.73 | 0.647 | -1.833 |
| 1140 | NTV  | 2415 | 0.0001350212 | 128.40 | 0.563 | 0.000  |
| 1141 | NWA  | 485  | 0.0000271161 | 147.63 | 0.647 | -0.867 |
| 1142 | NWR  | 508  | 0.0000284020 | 182.30 | 0.799 | -2.967 |
| 1143 | NWN  | 405  | 0.0000226433 | 159.20 | 0.698 | -2.633 |
| 1144 | NWD  | 404  | 0.0000225874 | 156.73 | 0.687 | -2.633 |
| 1145 | NWC  | 142  | 0.0000079391 | 152.07 | 0.666 | -0.633 |
| 1146 | NWQ  | 334  | 0.0000186737 | 167.43 | 0.734 | -2.633 |
| 1147 | NWE  | 468  | 0.0000261656 | 165.03 | 0.723 | -2.633 |
| 1148 | NWG  | 441  | 0.0000246560 | 139.27 | 0.610 | -1.600 |
| 1149 | NWH  | 189  | 0.0000105669 | 170.97 | 0.749 | -2.533 |
| 1150 | NWI  | 407  | 0.0000227551 | 172.27 | 0.755 | 0.033  |
| 1151 | NWL  | 773  | 0.0000432180 | 172.30 | 0.755 | -0.200 |
| 1152 | NWK  | 600  | 0.0000335456 | 173.40 | 0.760 | -2.767 |
| 1153 | NWM  | 213  | 0.0000119087 | 173.30 | 0.759 | -0.833 |
| 1154 | NWF  | 333  | 0.0000186178 | 181.60 | 0.796 | -0.533 |
| 1155 | NWP  | 333  | 0.0000186178 | 158.60 | 0.695 | -2.000 |
| 1156 | NWS  | 560  | 0.0000313093 | 149.43 | 0.655 | -1.733 |
| 1157 | NWT  | 490  | 0.0000273956 | 158.13 | 0.693 | -1.700 |
| 1158 | NWW  | 94   | 0.0000052555 | 193.70 | 0.849 | -1.767 |
| 1159 | NWY  | 267  | 0.0000149278 | 183.30 | 0.803 | -1.900 |
| 1160 | NWV  | 426  | 0.0000238174 | 163.97 | 0.719 | -0.067 |
| 1161 | NYA  | 842  | 0.0000470757 | 137.23 | 0.601 | -1.000 |
| 1162 | NYR  | 1145 | 0.0000640163 | 171.90 | 0.753 | -3.100 |
| 1163 | NYN  | 811  | 0.0000453425 | 148.80 | 0.652 | -2.767 |
| 1164 | NYD  | 911  | 0.0000509335 | 146.33 | 0.641 | -2.767 |
| 1165 | NYC  | 500  | 0.0000279547 | 141.67 | 0.621 | -0.767 |
| 1166 | NYQ  | 847  | 0.0000473553 | 157.03 | 0.688 | -2.767 |
| 1167 | NYE  | 1076 | 0.0000601585 | 154.63 | 0.678 | -2.767 |
| 1168 | NYG  | 1101 | 0.0000615562 | 128.87 | 0.565 | -1.733 |
| 1169 | NYH  | 439  | 0.0000245442 | 160.57 | 0.704 | -2.667 |
| 1170 | NYI  | 1361 | 0.0000760927 | 161.87 | 0.709 | -0.100 |
| 1171 | NYL  | 1890 | 0.0001056688 | 161.90 | 0.709 | -0.333 |
| 1172 | NYK  | 957  | 0.0000535053 | 163.00 | 0.714 | -2.900 |
| 1173 | NYM  | 419  | 0.0000234260 | 162.90 | 0.714 | -0.967 |
| 1174 | NYF  | 861  | 0.0000481380 | 171.20 | 0.750 | -0.667 |
| 1175 | NYP  | 814  | 0.0000455103 | 148.20 | 0.649 | -2.133 |
| 1176 | NYS  | 1773 | 0.0000991274 | 139.03 | 0.609 | -1.867 |
| 1177 | NYT  | 1348 | 0.0000753659 | 147.73 | 0.647 | -1.833 |
| 1178 | NYW  | 224  | 0.0000125237 | 183.30 | 0.803 | -1.900 |
| 1179 | NY Y | 719  | 0.0000401989 | 172.90 | 0.758 | -2.033 |
| 1180 | NYV  | 1158 | 0.0000647431 | 153.57 | 0.673 | -0.200 |
| 1181 | NVA  | 2312 | 0.0001292625 | 117.90 | 0.517 | 0.833  |
| 1182 | NVR  | 1547 | 0.0000864918 | 152.57 | 0.669 | -1.267 |
| 1183 | NVN  | 1503 | 0.0000840318 | 129.47 | 0.567 | -0.933 |
| 1184 | NVD  | 1874 | 0.0001047742 | 127.00 | 0.557 | -0.933 |
| 1185 | NVC  | 979  | 0.0000547353 | 122.33 | 0.536 | 1.067  |
| 1186 | NVQ  | 1568 | 0.0000876659 | 137.70 | 0.603 | -0.933 |
| 1187 | NVE  | 2247 | 0.0001256284 | 135.30 | 0.593 | -0.933 |
| 1188 | NVG  | 1800 | 0.0001006369 | 109.53 | 0.480 | 0.100  |
| 1189 | NVH  | 993  | 0.0000555180 | 141.23 | 0.619 | -0.833 |
| 1190 | NVI  | 2012 | 0.0001124897 | 142.53 | 0.625 | 1.733  |

|      |     |      |              |        |       |        |
|------|-----|------|--------------|--------|-------|--------|
| 1191 | NVL | 3717 | 0.0002078152 | 142.57 | 0.625 | 1.500  |
| 1192 | NVK | 2126 | 0.0001188634 | 143.67 | 0.630 | -1.067 |
| 1193 | NVM | 755  | 0.0000422116 | 143.57 | 0.629 | 0.867  |
| 1194 | NVF | 1596 | 0.0000892314 | 151.87 | 0.665 | 1.167  |
| 1195 | NVP | 1980 | 0.0001107006 | 128.87 | 0.565 | -0.300 |
| 1196 | NVS | 3215 | 0.0001797487 | 119.70 | 0.525 | -0.033 |
| 1197 | NVT | 3022 | 0.0001689582 | 128.40 | 0.563 | 0.000  |
| 1198 | NVW | 339  | 0.0000189533 | 163.97 | 0.719 | -0.067 |
| 1199 | NVY | 1105 | 0.0000617799 | 153.57 | 0.673 | -0.200 |
| 1200 | NVV | 2401 | 0.0001342385 | 134.23 | 0.588 | 1.633  |
| 1201 | DAA | 4628 | 0.0002587487 | 99.10  | 0.434 | 0.033  |
| 1202 | DAR | 2456 | 0.0001373135 | 133.77 | 0.586 | -2.067 |
| 1203 | DAN | 1537 | 0.0000859327 | 110.67 | 0.485 | -1.733 |
| 1204 | DAD | 2920 | 0.0001632554 | 108.20 | 0.474 | -1.733 |
| 1205 | DAC | 1180 | 0.0000659731 | 103.53 | 0.454 | 0.267  |
| 1206 | DAQ | 2120 | 0.0001185279 | 118.90 | 0.521 | -1.733 |
| 1207 | DAE | 3769 | 0.0002107225 | 116.50 | 0.511 | -1.733 |
| 1208 | DAG | 3964 | 0.0002216249 | 90.73  | 0.398 | -0.700 |
| 1209 | DAH | 1259 | 0.0000703899 | 122.43 | 0.537 | -1.633 |
| 1210 | DAI | 2217 | 0.0001239511 | 123.73 | 0.542 | 0.933  |
| 1211 | DAL | 5429 | 0.0003035321 | 123.77 | 0.542 | 0.700  |
| 1212 | DAK | 2363 | 0.0001321139 | 124.87 | 0.547 | -1.867 |
| 1213 | DAM | 959  | 0.0000536171 | 124.77 | 0.547 | 0.067  |
| 1214 | DAF | 2181 | 0.0001219384 | 133.07 | 0.583 | 0.367  |
| 1215 | DAP | 2671 | 0.0001493340 | 110.07 | 0.482 | -1.100 |
| 1216 | DAS | 3861 | 0.0002158662 | 100.90 | 0.442 | -0.833 |
| 1217 | DAT | 2196 | 0.0001227770 | 109.60 | 0.480 | -0.800 |
| 1218 | DAW | 590  | 0.0000329865 | 145.17 | 0.636 | -0.867 |
| 1219 | DAY | 1234 | 0.0000689922 | 134.77 | 0.591 | -1.000 |
| 1220 | DAV | 3882 | 0.0002170403 | 115.43 | 0.506 | 0.833  |
| 1221 | DRA | 2556 | 0.0001429044 | 133.77 | 0.586 | -2.067 |
| 1222 | DRR | 2540 | 0.0001420099 | 168.43 | 0.738 | -4.167 |
| 1223 | DRN | 1576 | 0.0000881132 | 145.33 | 0.637 | -3.833 |
| 1224 | DRD | 2481 | 0.0001387112 | 142.87 | 0.626 | -3.833 |
| 1225 | DRC | 1140 | 0.0000637367 | 138.20 | 0.606 | -1.833 |
| 1226 | DRQ | 1591 | 0.0000889519 | 153.57 | 0.673 | -3.833 |
| 1227 | DRE | 3644 | 0.0002037339 | 151.17 | 0.662 | -3.833 |
| 1228 | DRG | 2850 | 0.0001593418 | 125.40 | 0.550 | -2.800 |
| 1229 | DRH | 1073 | 0.0000599908 | 157.10 | 0.688 | -3.733 |
| 1230 | DRI | 2014 | 0.0001126015 | 158.40 | 0.694 | -1.167 |
| 1231 | DRL | 4218 | 0.0002358258 | 158.43 | 0.694 | -1.400 |
| 1232 | DRK | 2393 | 0.0001337912 | 159.53 | 0.699 | -3.967 |
| 1233 | DRM | 861  | 0.0000481380 | 159.43 | 0.699 | -2.033 |
| 1234 | DRF | 1711 | 0.0000956610 | 167.73 | 0.735 | -1.733 |
| 1235 | DRP | 2202 | 0.0001231125 | 144.73 | 0.634 | -3.200 |
| 1236 | DRS | 3056 | 0.0001708591 | 135.57 | 0.594 | -2.933 |
| 1237 | DRT | 1935 | 0.0001081847 | 144.27 | 0.632 | -2.900 |
| 1238 | DRW | 590  | 0.0000329865 | 179.83 | 0.788 | -2.967 |
| 1239 | DRY | 1671 | 0.0000934246 | 169.43 | 0.742 | -3.100 |
| 1240 | DRV | 2434 | 0.0001360835 | 150.10 | 0.658 | -1.267 |
| 1241 | DNA | 1731 | 0.0000967792 | 110.67 | 0.485 | -1.733 |
| 1242 | DNR | 1340 | 0.0000749186 | 145.33 | 0.637 | -3.833 |



|      |     |      |              |        |       |        |
|------|-----|------|--------------|--------|-------|--------|
| 1243 | DNN | 1018 | 0.0000569158 | 122.23 | 0.536 | -3.500 |
| 1244 | DND | 1336 | 0.0000746950 | 119.77 | 0.525 | -3.500 |
| 1245 | DNC | 701  | 0.0000391925 | 115.10 | 0.504 | -1.500 |
| 1246 | DNQ | 1110 | 0.0000620594 | 130.47 | 0.572 | -3.500 |
| 1247 | DNE | 1746 | 0.0000976178 | 128.07 | 0.561 | -3.500 |
| 1248 | DNG | 1727 | 0.0000965555 | 102.30 | 0.448 | -2.467 |
| 1249 | DNH | 702  | 0.0000392484 | 134.00 | 0.587 | -3.400 |
| 1250 | DNI | 1791 | 0.0001001337 | 135.30 | 0.593 | -0.833 |
| 1251 | DNL | 2903 | 0.0001623050 | 135.33 | 0.593 | -1.067 |
| 1252 | DNK | 1499 | 0.0000838082 | 136.43 | 0.598 | -3.633 |
| 1253 | DNM | 620  | 0.0000346638 | 136.33 | 0.597 | -1.700 |
| 1254 | DNF | 1297 | 0.0000725145 | 144.63 | 0.634 | -1.400 |
| 1255 | DNP | 1650 | 0.0000922505 | 121.63 | 0.533 | -2.867 |
| 1256 | DNS | 2460 | 0.0001375371 | 112.47 | 0.493 | -2.600 |
| 1257 | DNT | 1430 | 0.0000799504 | 121.17 | 0.531 | -2.567 |
| 1258 | DNW | 394  | 0.0000220283 | 156.73 | 0.687 | -2.633 |
| 1259 | DNY | 939  | 0.0000524989 | 146.33 | 0.641 | -2.767 |
| 1260 | DNV | 1738 | 0.0000971705 | 127.00 | 0.557 | -0.933 |
| 1261 | DDA | 2374 | 0.0001327289 | 108.20 | 0.474 | -1.733 |
| 1262 | DDR | 1727 | 0.0000965555 | 142.87 | 0.626 | -3.833 |
| 1263 | DDN | 1531 | 0.0000855973 | 119.77 | 0.525 | -3.500 |
| 1264 | DDD | 4272 | 0.0002388450 | 117.30 | 0.514 | -3.500 |
| 1265 | DDC | 892  | 0.0000498712 | 112.63 | 0.494 | -1.500 |
| 1266 | DDQ | 1336 | 0.0000746950 | 128.00 | 0.561 | -3.500 |
| 1267 | DDE | 4096 | 0.0002290049 | 125.60 | 0.550 | -3.500 |
| 1268 | DDG | 2729 | 0.0001525768 | 99.83  | 0.437 | -2.467 |
| 1269 | DDH | 860  | 0.0000480821 | 131.53 | 0.576 | -3.400 |
| 1270 | DDI | 2639 | 0.0001475449 | 132.83 | 0.582 | -0.833 |
| 1271 | DDL | 4187 | 0.0002340927 | 132.87 | 0.582 | -1.067 |
| 1272 | DDK | 1858 | 0.0001038797 | 133.97 | 0.587 | -3.633 |
| 1273 | DDM | 1008 | 0.0000563567 | 133.87 | 0.587 | -1.700 |
| 1274 | DDF | 2152 | 0.0001203170 | 142.17 | 0.623 | -1.400 |
| 1275 | DDP | 2232 | 0.0001247898 | 119.17 | 0.522 | -2.867 |
| 1276 | DDS | 3745 | 0.0002093807 | 110.00 | 0.482 | -2.600 |
| 1277 | DDT | 1961 | 0.0001096383 | 118.70 | 0.520 | -2.567 |
| 1278 | DDW | 508  | 0.0000284020 | 154.27 | 0.676 | -2.633 |
| 1279 | DDY | 1265 | 0.0000707254 | 143.87 | 0.630 | -2.767 |
| 1280 | DDV | 2686 | 0.0001501727 | 124.53 | 0.546 | -0.933 |
| 1281 | DCA | 1117 | 0.0000624508 | 103.53 | 0.454 | 0.267  |
| 1282 | DCR | 998  | 0.0000557976 | 138.20 | 0.606 | -1.833 |
| 1283 | DCN | 579  | 0.0000323715 | 115.10 | 0.504 | -1.500 |
| 1284 | DCD | 878  | 0.0000490885 | 112.63 | 0.494 | -1.500 |
| 1285 | DCC | 482  | 0.0000269483 | 107.97 | 0.473 | 0.500  |
| 1286 | DCQ | 690  | 0.0000385775 | 123.33 | 0.540 | -1.500 |
| 1287 | DCE | 1118 | 0.0000625067 | 120.93 | 0.530 | -1.500 |
| 1288 | DCG | 1999 | 0.0001117629 | 95.17  | 0.417 | -0.467 |
| 1289 | DCH | 493  | 0.0000275633 | 126.87 | 0.556 | -1.400 |
| 1290 | DCI | 819  | 0.0000457898 | 128.17 | 0.562 | 1.167  |
| 1291 | DCL | 1691 | 0.0000945428 | 128.20 | 0.562 | 0.933  |
| 1292 | DCK | 962  | 0.0000537848 | 129.30 | 0.567 | -1.633 |
| 1293 | DCM | 293  | 0.0000163815 | 129.20 | 0.566 | 0.300  |
| 1294 | DCF | 752  | 0.0000420439 | 137.50 | 0.603 | 0.600  |

|      |     |      |              |        |       |        |
|------|-----|------|--------------|--------|-------|--------|
| 1295 | DCP | 1217 | 0.0000680417 | 114.50 | 0.502 | -0.867 |
| 1296 | DCS | 1703 | 0.0000952137 | 105.33 | 0.462 | -0.600 |
| 1297 | DCT | 923  | 0.0000516044 | 114.03 | 0.500 | -0.567 |
| 1298 | DCW | 308  | 0.0000172201 | 149.60 | 0.656 | -0.633 |
| 1299 | DCY | 466  | 0.0000260538 | 139.20 | 0.610 | -0.767 |
| 1300 | DCV | 1113 | 0.0000622272 | 119.87 | 0.525 | 1.067  |
| 1301 | DQA | 2039 | 0.0001139993 | 118.90 | 0.521 | -1.733 |
| 1302 | DQR | 1673 | 0.0000935364 | 153.57 | 0.673 | -3.833 |
| 1303 | DQN | 1290 | 0.0000721231 | 130.47 | 0.572 | -3.500 |
| 1304 | DQD | 1917 | 0.0001071783 | 128.00 | 0.561 | -3.500 |
| 1305 | DQC | 669  | 0.0000374034 | 123.33 | 0.540 | -1.500 |
| 1306 | DQQ | 1469 | 0.0000821309 | 138.70 | 0.608 | -3.500 |
| 1307 | DQE | 2610 | 0.0001459235 | 136.30 | 0.597 | -3.500 |
| 1308 | DQG | 2041 | 0.0001141111 | 110.53 | 0.484 | -2.467 |
| 1309 | DQH | 824  | 0.0000460693 | 142.23 | 0.623 | -3.400 |
| 1310 | DQI | 1534 | 0.0000857650 | 143.53 | 0.629 | -0.833 |
| 1311 | DQL | 3497 | 0.0001955152 | 143.57 | 0.629 | -1.067 |
| 1312 | DQK | 1633 | 0.0000913000 | 144.67 | 0.634 | -3.633 |
| 1313 | DQM | 654  | 0.0000365647 | 144.57 | 0.634 | -1.700 |
| 1314 | DQF | 936  | 0.0000523312 | 152.87 | 0.670 | -1.400 |
| 1315 | DQP | 1599 | 0.0000893991 | 129.87 | 0.569 | -2.867 |
| 1316 | DQS | 1978 | 0.0001105888 | 120.70 | 0.529 | -2.600 |
| 1317 | DQT | 1421 | 0.0000794473 | 129.40 | 0.567 | -2.567 |
| 1318 | DQW | 481  | 0.0000268924 | 164.97 | 0.723 | -2.633 |
| 1319 | DQY | 836  | 0.0000467403 | 154.57 | 0.677 | -2.767 |
| 1320 | DQV | 2200 | 0.0001230007 | 135.23 | 0.593 | -0.933 |
| 1321 | DEA | 4039 | 0.0002258181 | 116.50 | 0.511 | -1.733 |
| 1322 | DER | 2220 | 0.0001241189 | 151.17 | 0.662 | -3.833 |
| 1323 | DEN | 2768 | 0.0001547572 | 128.07 | 0.561 | -3.500 |
| 1324 | DED | 5525 | 0.0003088994 | 125.60 | 0.550 | -3.500 |
| 1325 | DEC | 1543 | 0.0000862682 | 120.93 | 0.530 | -1.500 |
| 1326 | DEQ | 2026 | 0.0001132724 | 136.30 | 0.597 | -3.500 |
| 1327 | DEE | 7431 | 0.0004154627 | 133.90 | 0.587 | -3.500 |
| 1328 | DEG | 3432 | 0.0001918811 | 108.13 | 0.474 | -2.467 |
| 1329 | DEH | 1134 | 0.0000634013 | 139.83 | 0.613 | -3.400 |
| 1330 | DEI | 2638 | 0.0001474890 | 141.13 | 0.618 | -0.833 |
| 1331 | DEL | 5221 | 0.0002919030 | 141.17 | 0.619 | -1.067 |
| 1332 | DEK | 3477 | 0.0001943970 | 142.27 | 0.623 | -3.633 |
| 1333 | DEM | 1239 | 0.0000692717 | 142.17 | 0.623 | -1.700 |
| 1334 | DEF | 1817 | 0.0001015874 | 150.47 | 0.659 | -1.400 |
| 1335 | DEP | 2169 | 0.0001212675 | 127.47 | 0.559 | -2.867 |
| 1336 | DES | 3296 | 0.0001842774 | 118.30 | 0.518 | -2.600 |
| 1337 | DET | 2342 | 0.0001309398 | 127.00 | 0.557 | -2.567 |
| 1338 | DEW | 552  | 0.0000308620 | 162.57 | 0.712 | -2.633 |
| 1339 | DEY | 1349 | 0.0000754218 | 152.17 | 0.667 | -2.767 |
| 1340 | DEV | 3534 | 0.0001975838 | 132.83 | 0.582 | -0.933 |
| 1341 | DGA | 3808 | 0.0002129030 | 90.73  | 0.398 | -0.700 |
| 1342 | DGR | 3493 | 0.0001952915 | 125.40 | 0.550 | -2.800 |
| 1343 | DGN | 2004 | 0.0001120424 | 102.30 | 0.448 | -2.467 |
| 1344 | DGD | 3099 | 0.0001732632 | 99.83  | 0.437 | -2.467 |
| 1345 | DGC | 1057 | 0.0000590962 | 95.17  | 0.417 | -0.467 |
| 1346 | DGQ | 2624 | 0.0001467063 | 110.53 | 0.484 | -2.467 |

|      |     |      |              |        |       |        |
|------|-----|------|--------------|--------|-------|--------|
| 1347 | DGE | 4140 | 0.0002314649 | 108.13 | 0.474 | -2.467 |
| 1348 | DGG | 4348 | 0.0002430941 | 82.37  | 0.361 | -1.433 |
| 1349 | DGH | 1531 | 0.0000855973 | 114.07 | 0.500 | -2.367 |
| 1350 | DGI | 2450 | 0.0001369780 | 115.37 | 0.506 | 0.200  |
| 1351 | DGL | 4877 | 0.0002726701 | 115.40 | 0.506 | -0.033 |
| 1352 | DGK | 3955 | 0.0002211217 | 116.50 | 0.511 | -2.600 |
| 1353 | DGM | 895  | 0.0000500389 | 116.40 | 0.510 | -0.667 |
| 1354 | DGF | 2196 | 0.0001227770 | 124.70 | 0.546 | -0.367 |
| 1355 | DGP | 2961 | 0.0001655477 | 101.70 | 0.446 | -1.833 |
| 1356 | DGS | 5300 | 0.0002963198 | 92.53  | 0.405 | -1.567 |
| 1357 | DGT | 3591 | 0.0002007706 | 101.23 | 0.444 | -1.533 |
| 1358 | DGW | 713  | 0.0000398634 | 136.80 | 0.599 | -1.600 |
| 1359 | DGY | 1571 | 0.0000878337 | 126.40 | 0.554 | -1.733 |
| 1360 | DGV | 3444 | 0.0001925520 | 107.07 | 0.469 | 0.100  |
| 1361 | DHA | 1039 | 0.0000580899 | 122.43 | 0.537 | -1.633 |
| 1362 | DHR | 1090 | 0.0000609412 | 157.10 | 0.688 | -3.733 |
| 1363 | DHN | 703  | 0.0000393043 | 134.00 | 0.587 | -3.400 |
| 1364 | DHD | 871  | 0.0000486971 | 131.53 | 0.576 | -3.400 |
| 1365 | DHC | 509  | 0.0000284579 | 126.87 | 0.556 | -1.400 |
| 1366 | DHQ | 984  | 0.0000550149 | 142.23 | 0.623 | -3.400 |
| 1367 | DHE | 1127 | 0.0000630099 | 139.83 | 0.613 | -3.400 |
| 1368 | DHG | 1328 | 0.0000742477 | 114.07 | 0.500 | -2.367 |
| 1369 | DHH | 598  | 0.0000334338 | 145.77 | 0.639 | -3.300 |
| 1370 | DHI | 1118 | 0.0000625067 | 147.07 | 0.644 | -0.733 |
| 1371 | DHL | 2316 | 0.0001294862 | 147.10 | 0.645 | -0.967 |
| 1372 | DHK | 878  | 0.0000490885 | 148.20 | 0.649 | -3.533 |
| 1373 | DHM | 476  | 0.0000266129 | 148.10 | 0.649 | -1.600 |
| 1374 | DHF | 843  | 0.0000471316 | 156.40 | 0.685 | -1.300 |
| 1375 | DHP | 1281 | 0.0000716199 | 133.40 | 0.585 | -2.767 |
| 1376 | DHS | 1651 | 0.0000923064 | 124.23 | 0.544 | -2.500 |
| 1377 | DHT | 962  | 0.0000537848 | 132.93 | 0.583 | -2.467 |
| 1378 | DHW | 272  | 0.0000152074 | 168.50 | 0.738 | -2.533 |
| 1379 | DHY | 665  | 0.0000371798 | 158.10 | 0.693 | -2.667 |
| 1380 | DHV | 1179 | 0.0000659172 | 138.77 | 0.608 | -0.833 |
| 1381 | DIA | 2493 | 0.0001393821 | 123.73 | 0.542 | 0.933  |
| 1382 | DIR | 2009 | 0.0001123220 | 158.40 | 0.694 | -1.167 |
| 1383 | DIN | 2051 | 0.0001146702 | 135.30 | 0.593 | -0.833 |
| 1384 | DID | 2259 | 0.0001262993 | 132.83 | 0.582 | -0.833 |
| 1385 | DIC | 1164 | 0.0000650785 | 128.17 | 0.562 | 1.167  |
| 1386 | DIQ | 1867 | 0.0001043829 | 143.53 | 0.629 | -0.833 |
| 1387 | DIE | 2703 | 0.0001511231 | 141.13 | 0.618 | -0.833 |
| 1388 | DIG | 1736 | 0.0000970587 | 115.37 | 0.506 | 0.200  |
| 1389 | DIH | 1016 | 0.0000568040 | 147.07 | 0.644 | -0.733 |
| 1390 | DII | 2407 | 0.0001345739 | 148.37 | 0.650 | 1.833  |
| 1391 | DIL | 4511 | 0.0002522073 | 148.40 | 0.650 | 1.600  |
| 1392 | DIK | 2583 | 0.0001444140 | 149.50 | 0.655 | -0.967 |
| 1393 | DIM | 968  | 0.0000541203 | 149.40 | 0.655 | 0.967  |
| 1394 | DIF | 2054 | 0.0001148379 | 157.70 | 0.691 | 1.267  |
| 1395 | DIP | 2343 | 0.0001309957 | 134.70 | 0.590 | -0.200 |
| 1396 | DIS | 3651 | 0.0002041252 | 125.53 | 0.550 | 0.067  |
| 1397 | DIT | 2490 | 0.0001392144 | 134.23 | 0.588 | 0.100  |
| 1398 | DIW | 623  | 0.0000348316 | 169.80 | 0.744 | 0.033  |

|      |     |      |              |        |       |        |
|------|-----|------|--------------|--------|-------|--------|
| 1399 | DIY | 1470 | 0.0000821868 | 159.40 | 0.699 | -0.100 |
| 1400 | DIV | 2641 | 0.0001476567 | 140.07 | 0.614 | 1.733  |
| 1401 | DLA | 5402 | 0.0003020226 | 123.77 | 0.542 | 0.700  |
| 1402 | DLR | 4959 | 0.0002772547 | 158.43 | 0.694 | -1.400 |
| 1403 | DLN | 3182 | 0.0001779037 | 135.33 | 0.593 | -1.067 |
| 1404 | DLD | 4611 | 0.0002577982 | 132.87 | 0.582 | -1.067 |
| 1405 | DLC | 1848 | 0.0001033206 | 128.20 | 0.562 | 0.933  |
| 1406 | DLQ | 4425 | 0.0002473991 | 143.57 | 0.629 | -1.067 |
| 1407 | DLE | 7041 | 0.0003936581 | 141.17 | 0.619 | -1.067 |
| 1408 | DLG | 5041 | 0.0002818393 | 115.40 | 0.506 | -0.033 |
| 1409 | DLH | 2108 | 0.0001178570 | 147.10 | 0.645 | -0.967 |
| 1410 | DLI | 3898 | 0.0002179348 | 148.40 | 0.650 | 1.600  |
| 1411 | DLL | 9193 | 0.0005139751 | 148.43 | 0.650 | 1.367  |
| 1412 | DLK | 5436 | 0.0003039235 | 149.53 | 0.655 | -1.200 |
| 1413 | DLM | 1579 | 0.0000882809 | 149.43 | 0.655 | 0.733  |
| 1414 | DLF | 2750 | 0.0001537509 | 157.73 | 0.691 | 1.033  |
| 1415 | DLP | 4644 | 0.0002596432 | 134.73 | 0.590 | -0.433 |
| 1416 | DLS | 6985 | 0.0003905272 | 125.57 | 0.550 | -0.167 |
| 1417 | DLT | 4260 | 0.0002381740 | 134.27 | 0.588 | -0.133 |
| 1418 | DLW | 890  | 0.0000497594 | 169.83 | 0.744 | -0.200 |
| 1419 | DLY | 2163 | 0.0001209320 | 159.43 | 0.699 | -0.333 |
| 1420 | DLV | 4928 | 0.0002755215 | 140.10 | 0.614 | 1.500  |
| 1421 | DKA | 2828 | 0.0001581118 | 124.87 | 0.547 | -1.867 |
| 1422 | DKR | 1852 | 0.0001035442 | 159.53 | 0.699 | -3.967 |
| 1423 | DKN | 1799 | 0.0001005810 | 136.43 | 0.598 | -3.633 |
| 1424 | DKD | 2845 | 0.0001590622 | 133.97 | 0.587 | -3.633 |
| 1425 | DKC | 788  | 0.0000440566 | 129.30 | 0.567 | -1.633 |
| 1426 | DKQ | 1438 | 0.0000803977 | 144.67 | 0.634 | -3.633 |
| 1427 | DKE | 3651 | 0.0002041252 | 142.27 | 0.623 | -3.633 |
| 1428 | DKG | 2483 | 0.0001388230 | 116.50 | 0.511 | -2.600 |
| 1429 | DKH | 971  | 0.0000542880 | 148.20 | 0.649 | -3.533 |
| 1430 | DKI | 2229 | 0.0001246220 | 149.50 | 0.655 | -0.967 |
| 1431 | DKL | 4022 | 0.0002248676 | 149.53 | 0.655 | -1.200 |
| 1432 | DKK | 3046 | 0.0001703000 | 150.63 | 0.660 | -3.767 |
| 1433 | DKM | 926  | 0.0000517721 | 150.53 | 0.660 | -1.833 |
| 1434 | DKF | 1383 | 0.0000773227 | 158.83 | 0.696 | -1.533 |
| 1435 | DKP | 2098 | 0.0001172979 | 135.83 | 0.595 | -3.000 |
| 1436 | DKS | 2725 | 0.0001523531 | 126.67 | 0.555 | -2.733 |
| 1437 | DKT | 2148 | 0.0001200934 | 135.37 | 0.593 | -2.700 |
| 1438 | DKW | 522  | 0.0000291847 | 170.93 | 0.749 | -2.767 |
| 1439 | DKY | 1331 | 0.0000744154 | 160.53 | 0.703 | -2.900 |
| 1440 | DKV | 2931 | 0.0001638705 | 141.20 | 0.619 | -1.067 |
| 1441 | DMA | 1343 | 0.0000750863 | 124.77 | 0.547 | 0.067  |
| 1442 | DMR | 775  | 0.0000433298 | 159.43 | 0.699 | -2.033 |
| 1443 | DMN | 744  | 0.0000415966 | 136.33 | 0.597 | -1.700 |
| 1444 | DMD | 1185 | 0.0000662526 | 133.87 | 0.587 | -1.700 |
| 1445 | DMC | 328  | 0.0000183383 | 129.20 | 0.566 | 0.300  |
| 1446 | DMQ | 701  | 0.0000391925 | 144.57 | 0.634 | -1.700 |
| 1447 | DME | 1604 | 0.0000896787 | 142.17 | 0.623 | -1.700 |
| 1448 | DMG | 962  | 0.0000537848 | 116.40 | 0.510 | -0.667 |
| 1449 | DMH | 392  | 0.0000219165 | 148.10 | 0.649 | -1.600 |
| 1450 | DMI | 764  | 0.0000427148 | 149.40 | 0.655 | 0.967  |

|      |     |      |              |        |       |        |
|------|-----|------|--------------|--------|-------|--------|
| 1451 | DML | 1711 | 0.0000956610 | 149.43 | 0.655 | 0.733  |
| 1452 | DMK | 1145 | 0.0000640163 | 150.53 | 0.660 | -1.833 |
| 1453 | DMM | 439  | 0.0000245442 | 150.43 | 0.659 | 0.100  |
| 1454 | DMF | 692  | 0.0000386893 | 158.73 | 0.696 | 0.400  |
| 1455 | DMP | 728  | 0.0000407020 | 135.73 | 0.595 | -1.067 |
| 1456 | DMS | 1164 | 0.0000650785 | 126.57 | 0.555 | -0.800 |
| 1457 | DMT | 841  | 0.0000470198 | 135.27 | 0.593 | -0.767 |
| 1458 | DMW | 292  | 0.0000163255 | 170.83 | 0.749 | -0.833 |
| 1459 | DMY | 503  | 0.0000281224 | 160.43 | 0.703 | -0.967 |
| 1460 | DMV | 1192 | 0.0000666440 | 141.10 | 0.618 | 0.867  |
| 1461 | DFA | 1755 | 0.0000981210 | 133.07 | 0.583 | 0.367  |
| 1462 | DFR | 1858 | 0.0001038797 | 167.73 | 0.735 | -1.733 |
| 1463 | DFN | 1189 | 0.0000664763 | 144.63 | 0.634 | -1.400 |
| 1464 | DFD | 1794 | 0.0001003015 | 142.17 | 0.623 | -1.400 |
| 1465 | DFC | 824  | 0.0000460693 | 137.50 | 0.603 | 0.600  |
| 1466 | DFQ | 1761 | 0.0000984565 | 152.87 | 0.670 | -1.400 |
| 1467 | DFE | 2352 | 0.0001314989 | 150.47 | 0.659 | -1.400 |
| 1468 | DFG | 2392 | 0.0001337353 | 124.70 | 0.546 | -0.367 |
| 1469 | DFH | 1016 | 0.0000568040 | 156.40 | 0.685 | -1.300 |
| 1470 | DFI | 1954 | 0.0001092470 | 157.70 | 0.691 | 1.267  |
| 1471 | DFL | 4355 | 0.0002434854 | 157.73 | 0.691 | 1.033  |
| 1472 | DFK | 1780 | 0.0000995187 | 158.83 | 0.696 | -1.533 |
| 1473 | DFM | 665  | 0.0000371798 | 158.73 | 0.696 | 0.400  |
| 1474 | DFF | 1489 | 0.0000832491 | 167.03 | 0.732 | 0.700  |
| 1475 | DFP | 1747 | 0.0000976737 | 144.03 | 0.631 | -0.767 |
| 1476 | DFS | 3150 | 0.0001761146 | 134.87 | 0.591 | -0.500 |
| 1477 | DFT | 1824 | 0.0001019787 | 143.57 | 0.629 | -0.467 |
| 1478 | DFW | 581  | 0.0000324834 | 179.13 | 0.785 | -0.533 |
| 1479 | DFY | 1106 | 0.0000618358 | 168.73 | 0.739 | -0.667 |
| 1480 | DFV | 2165 | 0.0001210438 | 149.40 | 0.655 | 1.167  |
| 1481 | DPA | 4290 | 0.0002398513 | 110.07 | 0.482 | -1.100 |
| 1482 | DPR | 3062 | 0.0001711946 | 144.73 | 0.634 | -3.200 |
| 1483 | DPN | 2283 | 0.0001276412 | 121.63 | 0.533 | -2.867 |
| 1484 | DPD | 3132 | 0.0001751082 | 119.17 | 0.522 | -2.867 |
| 1485 | DPC | 946  | 0.0000528903 | 114.50 | 0.502 | -0.867 |
| 1486 | DPQ | 2500 | 0.0001397735 | 129.87 | 0.569 | -2.867 |
| 1487 | DPE | 4486 | 0.0002508096 | 127.47 | 0.559 | -2.867 |
| 1488 | DPG | 3741 | 0.0002091571 | 101.70 | 0.446 | -1.833 |
| 1489 | DPH | 1213 | 0.0000678181 | 133.40 | 0.585 | -2.767 |
| 1490 | DPI | 1555 | 0.0000869391 | 134.70 | 0.590 | -0.200 |
| 1491 | DPL | 3914 | 0.0002188294 | 134.73 | 0.590 | -0.433 |
| 1492 | DPK | 2644 | 0.0001478245 | 135.83 | 0.595 | -3.000 |
| 1493 | DPM | 701  | 0.0000391925 | 135.73 | 0.595 | -1.067 |
| 1494 | DPF | 1685 | 0.0000942073 | 144.03 | 0.631 | -0.767 |
| 1495 | DPP | 2798 | 0.0001564345 | 121.03 | 0.530 | -2.233 |
| 1496 | DPS | 4929 | 0.0002755774 | 111.87 | 0.490 | -1.967 |
| 1497 | DPT | 2543 | 0.0001421776 | 120.57 | 0.528 | -1.933 |
| 1498 | DPW | 565  | 0.0000315888 | 156.13 | 0.684 | -2.000 |
| 1499 | DPY | 1436 | 0.0000802859 | 145.73 | 0.639 | -2.133 |
| 1500 | DPV | 3266 | 0.0001826001 | 126.40 | 0.554 | -0.300 |
| 1501 | DSA | 4324 | 0.0002417522 | 100.90 | 0.442 | -0.833 |
| 1502 | DSR | 3358 | 0.0001877438 | 135.57 | 0.594 | -2.933 |

|      |     |      |              |        |       |        |
|------|-----|------|--------------|--------|-------|--------|
| 1503 | DSN | 2243 | 0.0001254048 | 112.47 | 0.493 | -2.600 |
| 1504 | DSD | 4866 | 0.0002720551 | 110.00 | 0.482 | -2.600 |
| 1505 | DSC | 1712 | 0.0000957169 | 105.33 | 0.462 | -0.600 |
| 1506 | DSQ | 2958 | 0.0001653800 | 120.70 | 0.529 | -2.600 |
| 1507 | DSE | 5948 | 0.0003325491 | 118.30 | 0.518 | -2.600 |
| 1508 | DSG | 5820 | 0.0003253927 | 92.53  | 0.405 | -1.567 |
| 1509 | DSH | 1489 | 0.0000832491 | 124.23 | 0.544 | -2.500 |
| 1510 | DSI | 2808 | 0.0001569936 | 125.53 | 0.550 | 0.067  |
| 1511 | DSL | 7113 | 0.0003976836 | 125.57 | 0.550 | -0.167 |
| 1512 | DSK | 3354 | 0.0001875201 | 126.67 | 0.555 | -2.733 |
| 1513 | DSM | 1262 | 0.0000705577 | 126.57 | 0.555 | -0.800 |
| 1514 | DSF | 2713 | 0.0001516822 | 134.87 | 0.591 | -0.500 |
| 1515 | DSP | 4396 | 0.0002457777 | 111.87 | 0.490 | -1.967 |
| 1516 | DSS | 7767 | 0.0004342483 | 102.70 | 0.450 | -1.700 |
| 1517 | DST | 3526 | 0.0001971365 | 111.40 | 0.488 | -1.667 |
| 1518 | DSW | 1057 | 0.0000590962 | 146.97 | 0.644 | -1.733 |
| 1519 | DSY | 1804 | 0.0001008606 | 136.57 | 0.598 | -1.867 |
| 1520 | DSV | 4217 | 0.0002357699 | 117.23 | 0.514 | -0.033 |
| 1521 | DTA | 2902 | 0.0001622491 | 109.60 | 0.480 | -0.800 |
| 1522 | DTR | 1864 | 0.0001042151 | 144.27 | 0.632 | -2.900 |
| 1523 | DTN | 1323 | 0.0000739681 | 121.17 | 0.531 | -2.567 |
| 1524 | DTD | 2262 | 0.0001264671 | 118.70 | 0.520 | -2.567 |
| 1525 | DTC | 1030 | 0.0000575867 | 114.03 | 0.500 | -0.567 |
| 1526 | DTQ | 1623 | 0.0000907410 | 129.40 | 0.567 | -2.567 |
| 1527 | DTE | 3092 | 0.0001728719 | 127.00 | 0.557 | -2.567 |
| 1528 | DTG | 2785 | 0.0001557077 | 101.23 | 0.444 | -1.533 |
| 1529 | DTH | 965  | 0.0000539526 | 132.93 | 0.583 | -2.467 |
| 1530 | DTI | 2142 | 0.0001197579 | 134.23 | 0.588 | 0.100  |
| 1531 | DTL | 4237 | 0.0002368881 | 134.27 | 0.588 | -0.133 |
| 1532 | DTK | 1946 | 0.0001087997 | 135.37 | 0.593 | -2.700 |
| 1533 | DTM | 927  | 0.0000518280 | 135.27 | 0.593 | -0.767 |
| 1534 | DTF | 1868 | 0.0001044388 | 143.57 | 0.629 | -0.467 |
| 1535 | DTP | 2546 | 0.0001423453 | 120.57 | 0.528 | -1.933 |
| 1536 | DTS | 3829 | 0.0002140771 | 111.40 | 0.488 | -1.667 |
| 1537 | DTT | 2337 | 0.0001306603 | 120.10 | 0.526 | -1.633 |
| 1538 | DTW | 719  | 0.0000401989 | 155.67 | 0.682 | -1.700 |
| 1539 | DTY | 1354 | 0.0000757013 | 145.27 | 0.637 | -1.833 |
| 1540 | DTV | 3212 | 0.0001795810 | 125.93 | 0.552 | 0.000  |
| 1541 | DWA | 643  | 0.0000359497 | 145.17 | 0.636 | -0.867 |
| 1542 | DWR | 678  | 0.0000379066 | 179.83 | 0.788 | -2.967 |
| 1543 | DWN | 530  | 0.0000296320 | 156.73 | 0.687 | -2.633 |
| 1544 | DWD | 601  | 0.0000336016 | 154.27 | 0.676 | -2.633 |
| 1545 | DWC | 252  | 0.0000140892 | 149.60 | 0.656 | -0.633 |
| 1546 | DWQ | 482  | 0.0000269483 | 164.97 | 0.723 | -2.633 |
| 1547 | DWE | 771  | 0.0000431061 | 162.57 | 0.712 | -2.633 |
| 1548 | DWG | 540  | 0.0000301911 | 136.80 | 0.599 | -1.600 |
| 1549 | DWH | 264  | 0.0000147601 | 168.50 | 0.738 | -2.533 |
| 1550 | DWI | 626  | 0.0000349993 | 169.80 | 0.744 | 0.033  |
| 1551 | DWL | 1164 | 0.0000650785 | 169.83 | 0.744 | -0.200 |
| 1552 | DWK | 681  | 0.0000380743 | 170.93 | 0.749 | -2.767 |
| 1553 | DWM | 257  | 0.0000143687 | 170.83 | 0.749 | -0.833 |
| 1554 | DWF | 374  | 0.0000209101 | 179.13 | 0.785 | -0.533 |

|      |     |      |              |        |       |        |
|------|-----|------|--------------|--------|-------|--------|
| 1555 | DWP | 477  | 0.0000266688 | 156.13 | 0.684 | -2.000 |
| 1556 | DWS | 797  | 0.0000445598 | 146.97 | 0.644 | -1.733 |
| 1557 | DWT | 606  | 0.0000338811 | 155.67 | 0.682 | -1.700 |
| 1558 | DWW | 289  | 0.0000161578 | 191.23 | 0.838 | -1.767 |
| 1559 | DWY | 248  | 0.0000138655 | 180.83 | 0.792 | -1.900 |
| 1560 | DWV | 600  | 0.0000335456 | 161.50 | 0.708 | -0.067 |
| 1561 | DYA | 1146 | 0.0000640722 | 134.77 | 0.591 | -1.000 |
| 1562 | DYR | 1317 | 0.0000736327 | 169.43 | 0.742 | -3.100 |
| 1563 | DYN | 937  | 0.0000523871 | 146.33 | 0.641 | -2.767 |
| 1564 | DYD | 1458 | 0.0000815159 | 143.87 | 0.630 | -2.767 |
| 1565 | DYC | 546  | 0.0000305265 | 139.20 | 0.610 | -0.767 |
| 1566 | DYQ | 840  | 0.0000469639 | 154.57 | 0.677 | -2.767 |
| 1567 | DYE | 2005 | 0.0001120983 | 152.17 | 0.667 | -2.767 |
| 1568 | DYG | 1389 | 0.0000776582 | 126.40 | 0.554 | -1.733 |
| 1569 | DYH | 602  | 0.0000336575 | 158.10 | 0.693 | -2.667 |
| 1570 | DYI | 1607 | 0.0000898464 | 159.40 | 0.699 | -0.100 |
| 1571 | DYL | 2414 | 0.0001349653 | 159.43 | 0.699 | -0.333 |
| 1572 | DYK | 1185 | 0.0000662526 | 160.53 | 0.703 | -2.900 |
| 1573 | DYM | 525  | 0.0000293524 | 160.43 | 0.703 | -0.967 |
| 1574 | DYF | 1176 | 0.0000657495 | 168.73 | 0.739 | -0.667 |
| 1575 | DYP | 1012 | 0.0000565803 | 145.73 | 0.639 | -2.133 |
| 1576 | DYS | 1901 | 0.0001062838 | 136.57 | 0.598 | -1.867 |
| 1577 | DYT | 1116 | 0.0000623949 | 145.27 | 0.637 | -1.833 |
| 1578 | DYW | 311  | 0.0000173878 | 180.83 | 0.792 | -1.900 |
| 1579 | DYY | 1051 | 0.0000587608 | 170.43 | 0.747 | -2.033 |
| 1580 | DYV | 1598 | 0.0000893432 | 151.10 | 0.662 | -0.200 |
| 1581 | DVA | 3845 | 0.0002149716 | 115.43 | 0.506 | 0.833  |
| 1582 | DVR | 2431 | 0.0001359157 | 150.10 | 0.658 | -1.267 |
| 1583 | DVN | 2301 | 0.0001286475 | 127.00 | 0.557 | -0.933 |
| 1584 | DVD | 3243 | 0.0001813142 | 124.53 | 0.546 | -0.933 |
| 1585 | DVC | 1169 | 0.0000653581 | 119.87 | 0.525 | 1.067  |
| 1586 | DVQ | 2270 | 0.0001269143 | 135.23 | 0.593 | -0.933 |
| 1587 | DVE | 3442 | 0.0001924402 | 132.83 | 0.582 | -0.933 |
| 1588 | DVG | 2770 | 0.0001548690 | 107.07 | 0.469 | 0.100  |
| 1589 | DVH | 1218 | 0.0000680977 | 138.77 | 0.608 | -0.833 |
| 1590 | DVI | 2753 | 0.0001539186 | 140.07 | 0.614 | 1.733  |
| 1591 | DVL | 5291 | 0.0002958166 | 140.10 | 0.614 | 1.500  |
| 1592 | DVK | 2862 | 0.0001600127 | 141.20 | 0.619 | -1.067 |
| 1593 | DVM | 1334 | 0.0000745831 | 141.10 | 0.618 | 0.867  |
| 1594 | DVF | 2093 | 0.0001170184 | 149.40 | 0.655 | 1.167  |
| 1595 | DVP | 2768 | 0.0001547572 | 126.40 | 0.554 | -0.300 |
| 1596 | DVS | 4059 | 0.0002269363 | 117.23 | 0.514 | -0.033 |
| 1597 | DVT | 3163 | 0.0001768414 | 125.93 | 0.552 | 0.000  |
| 1598 | DVW | 801  | 0.0000447834 | 161.50 | 0.708 | -0.067 |
| 1599 | DVY | 1455 | 0.0000813482 | 151.10 | 0.662 | -0.200 |
| 1600 | DVV | 3803 | 0.0002126234 | 131.77 | 0.577 | 1.633  |
| 1601 | CAA | 1937 | 0.0001082965 | 94.43  | 0.414 | 2.033  |
| 1602 | CAR | 1405 | 0.0000785527 | 129.10 | 0.566 | -0.067 |
| 1603 | CAN | 741  | 0.0000414289 | 106.00 | 0.465 | 0.267  |
| 1604 | CAD | 1065 | 0.0000595435 | 103.53 | 0.454 | 0.267  |
| 1605 | CAC | 701  | 0.0000391925 | 98.87  | 0.433 | 2.267  |
| 1606 | CAQ | 1121 | 0.0000626744 | 114.23 | 0.501 | 0.267  |

|      |     |      |              |        |       |        |
|------|-----|------|--------------|--------|-------|--------|
| 1607 | CAE | 1410 | 0.0000788323 | 111.83 | 0.490 | 0.267  |
| 1608 | CAG | 1691 | 0.0000945428 | 86.07  | 0.377 | 1.300  |
| 1609 | CAH | 635  | 0.0000355025 | 117.77 | 0.516 | 0.367  |
| 1610 | CAI | 885  | 0.0000494798 | 119.07 | 0.522 | 2.933  |
| 1611 | CAL | 2466 | 0.0001378726 | 119.10 | 0.522 | 2.700  |
| 1612 | CAK | 996  | 0.0000556858 | 120.20 | 0.527 | 0.133  |
| 1613 | CAM | 443  | 0.0000247679 | 120.10 | 0.526 | 2.067  |
| 1614 | CAF | 898  | 0.0000502066 | 128.40 | 0.563 | 2.367  |
| 1615 | CAP | 1481 | 0.0000828018 | 105.40 | 0.462 | 0.900  |
| 1616 | CAS | 1923 | 0.0001075138 | 96.23  | 0.422 | 1.167  |
| 1617 | CAT | 1132 | 0.0000632894 | 104.93 | 0.460 | 1.200  |
| 1618 | CAW | 322  | 0.0000180028 | 140.50 | 0.616 | 1.133  |
| 1619 | CAY | 539  | 0.0000301352 | 130.10 | 0.570 | 1.000  |
| 1620 | CAV | 1603 | 0.0000896228 | 110.77 | 0.485 | 2.833  |
| 1621 | CRA | 1903 | 0.0001063956 | 129.10 | 0.566 | -0.067 |
| 1622 | CRR | 1949 | 0.0001089674 | 163.77 | 0.718 | -2.167 |
| 1623 | CRN | 1076 | 0.0000601585 | 140.67 | 0.616 | -1.833 |
| 1624 | CRD | 1321 | 0.0000738563 | 138.20 | 0.606 | -1.833 |
| 1625 | CRC | 910  | 0.0000508776 | 133.53 | 0.585 | 0.167  |
| 1626 | CRQ | 1171 | 0.0000654699 | 148.90 | 0.652 | -1.833 |
| 1627 | CRE | 1741 | 0.0000973383 | 146.50 | 0.642 | -1.833 |
| 1628 | CRG | 1743 | 0.0000974501 | 120.73 | 0.529 | -0.800 |
| 1629 | CRH | 760  | 0.0000424911 | 152.43 | 0.668 | -1.733 |
| 1630 | CRI | 777  | 0.0000434416 | 153.73 | 0.674 | 0.833  |
| 1631 | CRL | 2217 | 0.0001239511 | 153.77 | 0.674 | 0.600  |
| 1632 | CRK | 1469 | 0.0000821309 | 154.87 | 0.679 | -1.967 |
| 1633 | CRM | 435  | 0.0000243206 | 154.77 | 0.678 | -0.033 |
| 1634 | CRF | 741  | 0.0000414289 | 163.07 | 0.715 | 0.267  |
| 1635 | CRP | 1690 | 0.0000944869 | 140.07 | 0.614 | -1.200 |
| 1636 | CRS | 1801 | 0.0001006928 | 130.90 | 0.574 | -0.933 |
| 1637 | CRT | 1097 | 0.0000613326 | 139.60 | 0.612 | -0.900 |
| 1638 | CRW | 366  | 0.0000204628 | 175.17 | 0.768 | -0.967 |
| 1639 | CRY | 576  | 0.0000322038 | 164.77 | 0.722 | -1.100 |
| 1640 | CRV | 1411 | 0.0000788882 | 145.43 | 0.637 | 0.733  |
| 1641 | CNA | 655  | 0.0000366207 | 106.00 | 0.465 | 0.267  |
| 1642 | CNR | 698  | 0.0000390248 | 140.67 | 0.616 | -1.833 |
| 1643 | CNN | 601  | 0.0000336016 | 117.57 | 0.515 | -1.500 |
| 1644 | CND | 626  | 0.0000349993 | 115.10 | 0.504 | -1.500 |
| 1645 | CNC | 494  | 0.0000276192 | 110.43 | 0.484 | 0.500  |
| 1646 | CNQ | 659  | 0.0000368443 | 125.80 | 0.551 | -1.500 |
| 1647 | CNE | 1679 | 0.0000938719 | 123.40 | 0.541 | -1.500 |
| 1648 | CNG | 894  | 0.0000499830 | 97.63  | 0.428 | -0.467 |
| 1649 | CNH | 455  | 0.0000254388 | 129.33 | 0.567 | -1.400 |
| 1650 | CNI | 791  | 0.0000442243 | 130.63 | 0.572 | 1.167  |
| 1651 | CNL | 1262 | 0.0000705577 | 130.67 | 0.573 | 0.933  |
| 1652 | CNK | 887  | 0.0000495916 | 131.77 | 0.577 | -1.633 |
| 1653 | CNM | 266  | 0.0000148719 | 131.67 | 0.577 | 0.300  |
| 1654 | CNF | 516  | 0.0000288493 | 139.97 | 0.613 | 0.600  |
| 1655 | CNP | 864  | 0.0000483057 | 116.97 | 0.513 | -0.867 |
| 1656 | CNS | 1105 | 0.0000617799 | 107.80 | 0.472 | -0.600 |
| 1657 | CNT | 777  | 0.0000434416 | 116.50 | 0.511 | -0.567 |
| 1658 | CNW | 182  | 0.0000101755 | 152.07 | 0.666 | -0.633 |



|      |     |      |              |        |       |        |
|------|-----|------|--------------|--------|-------|--------|
| 1659 | CNY | 417  | 0.0000233142 | 141.67 | 0.621 | -0.767 |
| 1660 | CNV | 770  | 0.0000430502 | 122.33 | 0.536 | 1.067  |
| 1661 | CDA | 954  | 0.0000533376 | 103.53 | 0.454 | 0.267  |
| 1662 | CDR | 1011 | 0.0000565244 | 138.20 | 0.606 | -1.833 |
| 1663 | CDN | 626  | 0.0000349993 | 115.10 | 0.504 | -1.500 |
| 1664 | CDD | 856  | 0.0000478584 | 112.63 | 0.494 | -1.500 |
| 1665 | CDC | 733  | 0.0000409816 | 107.97 | 0.473 | 0.500  |
| 1666 | CDQ | 720  | 0.0000402548 | 123.33 | 0.540 | -1.500 |
| 1667 | CDE | 1132 | 0.0000632894 | 120.93 | 0.530 | -1.500 |
| 1668 | CDG | 1122 | 0.0000627303 | 95.17  | 0.417 | -0.467 |
| 1669 | CDH | 454  | 0.0000253829 | 126.87 | 0.556 | -1.400 |
| 1670 | CDI | 1055 | 0.0000589844 | 128.17 | 0.562 | 1.167  |
| 1671 | CDL | 1657 | 0.0000926419 | 128.20 | 0.562 | 0.933  |
| 1672 | CDK | 1101 | 0.0000615562 | 129.30 | 0.567 | -1.633 |
| 1673 | CDM | 352  | 0.0000196801 | 129.20 | 0.566 | 0.300  |
| 1674 | CDF | 700  | 0.0000391366 | 137.50 | 0.603 | 0.600  |
| 1675 | CDP | 1200 | 0.0000670913 | 114.50 | 0.502 | -0.867 |
| 1676 | CDS | 1482 | 0.0000828577 | 105.33 | 0.462 | -0.600 |
| 1677 | CDT | 798  | 0.0000446157 | 114.03 | 0.500 | -0.567 |
| 1678 | CDW | 178  | 0.0000099519 | 149.60 | 0.656 | -0.633 |
| 1679 | CDY | 450  | 0.0000251592 | 139.20 | 0.610 | -0.767 |
| 1680 | CDV | 1188 | 0.0000664204 | 119.87 | 0.525 | 1.067  |
| 1681 | CCA | 724  | 0.0000404784 | 98.87  | 0.433 | 2.267  |
| 1682 | CCR | 1162 | 0.0000649667 | 133.53 | 0.585 | 0.167  |
| 1683 | CCN | 342  | 0.0000191210 | 110.43 | 0.484 | 0.500  |
| 1684 | CCD | 431  | 0.0000240970 | 107.97 | 0.473 | 0.500  |
| 1685 | CCC | 806  | 0.0000450630 | 103.30 | 0.453 | 2.500  |
| 1686 | CCQ | 876  | 0.0000489766 | 118.67 | 0.520 | 0.500  |
| 1687 | CCE | 607  | 0.0000339370 | 116.27 | 0.509 | 0.500  |
| 1688 | CCG | 965  | 0.0000539526 | 90.50  | 0.397 | 1.533  |
| 1689 | CCH | 408  | 0.0000228110 | 122.20 | 0.535 | 0.600  |
| 1690 | CCI | 523  | 0.0000292406 | 123.50 | 0.541 | 3.167  |
| 1691 | CCL | 1239 | 0.0000692717 | 123.53 | 0.541 | 2.933  |
| 1692 | CCK | 622  | 0.0000347756 | 124.63 | 0.546 | 0.367  |
| 1693 | CCM | 164  | 0.0000091691 | 124.53 | 0.546 | 2.300  |
| 1694 | CCF | 495  | 0.0000276752 | 132.83 | 0.582 | 2.600  |
| 1695 | CCP | 967  | 0.0000540644 | 109.83 | 0.481 | 1.133  |
| 1696 | CCS | 1166 | 0.0000651904 | 100.67 | 0.441 | 1.400  |
| 1697 | CCT | 513  | 0.0000286815 | 109.37 | 0.479 | 1.433  |
| 1698 | CCW | 257  | 0.0000143687 | 144.93 | 0.635 | 1.367  |
| 1699 | CCY | 361  | 0.0000201833 | 134.53 | 0.590 | 1.233  |
| 1700 | CCV | 900  | 0.0000503185 | 115.20 | 0.505 | 3.067  |
| 1701 | CQA | 1564 | 0.0000874423 | 114.23 | 0.501 | 0.267  |
| 1702 | CQR | 1179 | 0.0000659172 | 148.90 | 0.652 | -1.833 |
| 1703 | CQN | 873  | 0.0000488089 | 125.80 | 0.551 | -1.500 |
| 1704 | CQD | 1069 | 0.0000597671 | 123.33 | 0.540 | -1.500 |
| 1705 | CQC | 598  | 0.0000334338 | 118.67 | 0.520 | 0.500  |
| 1706 | CQQ | 1086 | 0.0000607176 | 134.03 | 0.587 | -1.500 |
| 1707 | CQE | 1681 | 0.0000939837 | 131.63 | 0.577 | -1.500 |
| 1708 | CQG | 1333 | 0.0000745272 | 105.87 | 0.464 | -0.467 |
| 1709 | CQH | 606  | 0.0000338811 | 137.57 | 0.603 | -1.400 |
| 1710 | CQI | 701  | 0.0000391925 | 138.87 | 0.609 | 1.167  |

|      |     |      |              |        |       |        |
|------|-----|------|--------------|--------|-------|--------|
| 1711 | CQL | 1721 | 0.0000962201 | 138.90 | 0.609 | 0.933  |
| 1712 | CQK | 1178 | 0.0000658613 | 140.00 | 0.613 | -1.633 |
| 1713 | CQM | 356  | 0.0000199037 | 139.90 | 0.613 | 0.300  |
| 1714 | CQF | 506  | 0.0000282902 | 148.20 | 0.649 | 0.600  |
| 1715 | CQP | 1574 | 0.0000880014 | 125.20 | 0.549 | -0.867 |
| 1716 | CQS | 1379 | 0.0000770991 | 116.03 | 0.508 | -0.600 |
| 1717 | CQT | 857  | 0.0000479144 | 124.73 | 0.547 | -0.567 |
| 1718 | CQW | 227  | 0.0000126914 | 160.30 | 0.702 | -0.633 |
| 1719 | CQY | 515  | 0.0000287933 | 149.90 | 0.657 | -0.767 |
| 1720 | CQV | 1236 | 0.0000691040 | 130.57 | 0.572 | 1.067  |
| 1721 | CEA | 1709 | 0.0000955492 | 111.83 | 0.490 | 0.267  |
| 1722 | CER | 1220 | 0.0000682095 | 146.50 | 0.642 | -1.833 |
| 1723 | CEN | 1028 | 0.0000574749 | 123.40 | 0.541 | -1.500 |
| 1724 | CED | 1437 | 0.0000803418 | 120.93 | 0.530 | -1.500 |
| 1725 | CEC | 719  | 0.0000401989 | 116.27 | 0.509 | 0.500  |
| 1726 | CEQ | 980  | 0.0000547912 | 131.63 | 0.577 | -1.500 |
| 1727 | CEE | 3160 | 0.0001766737 | 129.23 | 0.566 | -1.500 |
| 1728 | CEG | 1395 | 0.0000779936 | 103.47 | 0.453 | -0.467 |
| 1729 | CEH | 573  | 0.0000320361 | 135.17 | 0.592 | -1.400 |
| 1730 | CEI | 952  | 0.0000532257 | 136.47 | 0.598 | 1.167  |
| 1731 | CEL | 1738 | 0.0000971705 | 136.50 | 0.598 | 0.933  |
| 1732 | CEK | 1764 | 0.0000986242 | 137.60 | 0.603 | -1.633 |
| 1733 | CEM | 460  | 0.0000257183 | 137.50 | 0.603 | 0.300  |
| 1734 | CEF | 670  | 0.0000374593 | 145.80 | 0.639 | 0.600  |
| 1735 | CEP | 1061 | 0.0000593199 | 122.80 | 0.538 | -0.867 |
| 1736 | CES | 1346 | 0.0000752541 | 113.63 | 0.498 | -0.600 |
| 1737 | CET | 1166 | 0.0000651904 | 122.33 | 0.536 | -0.567 |
| 1738 | CEW | 248  | 0.0000138655 | 157.90 | 0.692 | -0.633 |
| 1739 | CEY | 500  | 0.0000279547 | 147.50 | 0.646 | -0.767 |
| 1740 | CEV | 1649 | 0.0000921946 | 128.17 | 0.562 | 1.067  |
| 1741 | CGA | 2019 | 0.0001128811 | 86.07  | 0.377 | 1.300  |
| 1742 | CGR | 2269 | 0.0001268584 | 120.73 | 0.529 | -0.800 |
| 1743 | CGN | 1179 | 0.0000659172 | 97.63  | 0.428 | -0.467 |
| 1744 | CGD | 1504 | 0.0000840877 | 95.17  | 0.417 | -0.467 |
| 1745 | CGC | 814  | 0.0000455103 | 90.50  | 0.397 | 1.533  |
| 1746 | CGQ | 1353 | 0.0000756454 | 105.87 | 0.464 | -0.467 |
| 1747 | CGE | 1983 | 0.0001108683 | 103.47 | 0.453 | -0.467 |
| 1748 | CGG | 2418 | 0.0001351889 | 77.70  | 0.340 | 0.567  |
| 1749 | CGH | 1116 | 0.0000623949 | 109.40 | 0.479 | -0.367 |
| 1750 | CGI | 1127 | 0.0000630099 | 110.70 | 0.485 | 2.200  |
| 1751 | CGL | 2462 | 0.0001376489 | 110.73 | 0.485 | 1.967  |
| 1752 | CGK | 7887 | 0.0004409574 | 111.83 | 0.490 | -0.600 |
| 1753 | CGM | 421  | 0.0000235379 | 111.73 | 0.490 | 1.333  |
| 1754 | CGF | 941  | 0.0000526107 | 120.03 | 0.526 | 1.633  |
| 1755 | CGP | 1813 | 0.0001013637 | 97.03  | 0.425 | 0.167  |
| 1756 | CGS | 2650 | 0.0001481599 | 87.87  | 0.385 | 0.433  |
| 1757 | CGT | 1476 | 0.0000825223 | 96.57  | 0.423 | 0.467  |
| 1758 | CGW | 412  | 0.0000230347 | 132.13 | 0.579 | 0.400  |
| 1759 | CGY | 722  | 0.0000403666 | 121.73 | 0.533 | 0.267  |
| 1760 | CGV | 1562 | 0.0000873305 | 102.40 | 0.449 | 2.100  |
| 1761 | CHA | 606  | 0.0000338811 | 117.77 | 0.516 | 0.367  |
| 1762 | CHR | 885  | 0.0000494798 | 152.43 | 0.668 | -1.733 |

|      |     |      |              |        |       |        |
|------|-----|------|--------------|--------|-------|--------|
| 1763 | CHN | 417  | 0.0000233142 | 129.33 | 0.567 | -1.400 |
| 1764 | CHD | 457  | 0.0000255506 | 126.87 | 0.556 | -1.400 |
| 1765 | CHC | 514  | 0.0000287374 | 122.20 | 0.535 | 0.600  |
| 1766 | CHQ | 674  | 0.0000376829 | 137.57 | 0.603 | -1.400 |
| 1767 | CHE | 578  | 0.0000323156 | 135.17 | 0.592 | -1.400 |
| 1768 | CHG | 810  | 0.0000452866 | 109.40 | 0.479 | -0.367 |
| 1769 | CHH | 395  | 0.0000220842 | 141.10 | 0.618 | -1.300 |
| 1770 | CHI | 533  | 0.0000297997 | 142.40 | 0.624 | 1.267  |
| 1771 | CHL | 1377 | 0.0000769872 | 142.43 | 0.624 | 1.033  |
| 1772 | CHK | 611  | 0.0000341606 | 143.53 | 0.629 | -1.533 |
| 1773 | CHM | 177  | 0.0000098960 | 143.43 | 0.629 | 0.400  |
| 1774 | CHF | 496  | 0.0000277311 | 151.73 | 0.665 | 0.700  |
| 1775 | CHP | 1074 | 0.0000600467 | 128.73 | 0.564 | -0.767 |
| 1776 | CHS | 1138 | 0.0000636249 | 119.57 | 0.524 | -0.500 |
| 1777 | CHT | 626  | 0.0000349993 | 128.27 | 0.562 | -0.467 |
| 1778 | CHW | 109  | 0.0000060941 | 163.83 | 0.718 | -0.533 |
| 1779 | CHY | 355  | 0.0000198478 | 153.43 | 0.672 | -0.667 |
| 1780 | CHV | 695  | 0.0000388570 | 134.10 | 0.588 | 1.167  |
| 1781 | CIA | 1156 | 0.0000646313 | 119.07 | 0.522 | 2.933  |
| 1782 | CIR | 833  | 0.0000465725 | 153.73 | 0.674 | 0.833  |
| 1783 | CIN | 696  | 0.0000389129 | 130.63 | 0.572 | 1.167  |
| 1784 | CID | 770  | 0.0000430502 | 128.17 | 0.562 | 1.167  |
| 1785 | CIC | 601  | 0.0000336016 | 123.50 | 0.541 | 3.167  |
| 1786 | CIQ | 842  | 0.0000470757 | 138.87 | 0.609 | 1.167  |
| 1787 | CIE | 922  | 0.0000515485 | 136.47 | 0.598 | 1.167  |
| 1788 | CIG | 733  | 0.0000409816 | 110.70 | 0.485 | 2.200  |
| 1789 | CIH | 619  | 0.0000346079 | 142.40 | 0.624 | 1.267  |
| 1790 | CII | 897  | 0.0000501507 | 143.70 | 0.630 | 3.833  |
| 1791 | CIL | 1489 | 0.0000832491 | 143.73 | 0.630 | 3.600  |
| 1792 | CIK | 743  | 0.0000415407 | 144.83 | 0.635 | 1.033  |
| 1793 | CIM | 335  | 0.0000187296 | 144.73 | 0.634 | 2.967  |
| 1794 | CIF | 709  | 0.0000396398 | 153.03 | 0.671 | 3.267  |
| 1795 | CIP | 1020 | 0.0000570276 | 130.03 | 0.570 | 1.800  |
| 1796 | CIS | 1529 | 0.0000854855 | 120.87 | 0.530 | 2.067  |
| 1797 | CIT | 833  | 0.0000465725 | 129.57 | 0.568 | 2.100  |
| 1798 | CIW | 217  | 0.0000121323 | 165.13 | 0.724 | 2.033  |
| 1799 | CIY | 782  | 0.0000437211 | 154.73 | 0.678 | 1.900  |
| 1800 | CIV | 954  | 0.0000533376 | 135.40 | 0.593 | 3.733  |
| 1801 | CLA | 2846 | 0.0001591181 | 119.10 | 0.522 | 2.700  |
| 1802 | CLR | 2334 | 0.0001304925 | 153.77 | 0.674 | 0.600  |
| 1803 | CLN | 1404 | 0.0000784968 | 130.67 | 0.573 | 0.933  |
| 1804 | CLD | 2035 | 0.0001137756 | 128.20 | 0.562 | 0.933  |
| 1805 | CLC | 1248 | 0.0000697749 | 123.53 | 0.541 | 2.933  |
| 1806 | CLQ | 2236 | 0.0001250134 | 138.90 | 0.609 | 0.933  |
| 1807 | CLE | 2792 | 0.0001560990 | 136.50 | 0.598 | 0.933  |
| 1808 | CLG | 2431 | 0.0001359157 | 110.73 | 0.485 | 1.967  |
| 1809 | CLH | 1194 | 0.0000667558 | 142.43 | 0.624 | 1.033  |
| 1810 | CLI | 1310 | 0.0000732413 | 143.73 | 0.630 | 3.600  |
| 1811 | CLL | 4349 | 0.0002431500 | 143.77 | 0.630 | 3.367  |
| 1812 | CLK | 2088 | 0.0001167388 | 144.87 | 0.635 | 0.800  |
| 1813 | CLM | 645  | 0.0000360616 | 144.77 | 0.634 | 2.733  |
| 1814 | CLF | 1221 | 0.0000682654 | 153.07 | 0.671 | 3.033  |

|      |     |      |              |        |       |        |
|------|-----|------|--------------|--------|-------|--------|
| 1815 | CLP | 2837 | 0.0001586150 | 130.07 | 0.570 | 1.567  |
| 1816 | CLS | 3142 | 0.0001756673 | 120.90 | 0.530 | 1.833  |
| 1817 | CLT | 1818 | 0.0001016433 | 129.60 | 0.568 | 1.867  |
| 1818 | CLW | 469  | 0.0000262215 | 165.17 | 0.724 | 1.800  |
| 1819 | CLY | 906  | 0.0000506539 | 154.77 | 0.678 | 1.667  |
| 1820 | CLV | 2313 | 0.0001293184 | 135.43 | 0.593 | 3.500  |
| 1821 | CKA | 1566 | 0.0000875541 | 120.20 | 0.527 | 0.133  |
| 1822 | CKR | 952  | 0.0000532257 | 154.87 | 0.679 | -1.967 |
| 1823 | CKN | 988  | 0.0000552385 | 131.77 | 0.577 | -1.633 |
| 1824 | CKD | 1298 | 0.0000725704 | 129.30 | 0.567 | -1.633 |
| 1825 | CKC | 594  | 0.0000332102 | 124.63 | 0.546 | 0.367  |
| 1826 | CKQ | 1070 | 0.0000598231 | 140.00 | 0.613 | -1.633 |
| 1827 | CKE | 2615 | 0.0001462031 | 137.60 | 0.603 | -1.633 |
| 1828 | CKG | 1061 | 0.0000593199 | 111.83 | 0.490 | -0.600 |
| 1829 | CKH | 493  | 0.0000275633 | 143.53 | 0.629 | -1.533 |
| 1830 | CKI | 958  | 0.0000535612 | 144.83 | 0.635 | 1.033  |
| 1831 | CKL | 1535 | 0.0000858209 | 144.87 | 0.635 | 0.800  |
| 1832 | CKK | 1580 | 0.0000883368 | 145.97 | 0.640 | -1.767 |
| 1833 | CKM | 454  | 0.0000253829 | 145.87 | 0.639 | 0.167  |
| 1834 | CKF | 617  | 0.0000344961 | 154.17 | 0.676 | 0.467  |
| 1835 | CKP | 1142 | 0.0000638485 | 131.17 | 0.575 | -1.000 |
| 1836 | CKS | 1231 | 0.0000688245 | 122.00 | 0.535 | -0.733 |
| 1837 | CKT | 1015 | 0.0000567480 | 130.70 | 0.573 | -0.700 |
| 1838 | CKW | 210  | 0.0000117410 | 166.27 | 0.729 | -0.767 |
| 1839 | CKY | 575  | 0.0000321479 | 155.87 | 0.683 | -0.900 |
| 1840 | CKV | 1373 | 0.0000767636 | 136.53 | 0.598 | 0.933  |
| 1841 | CMA | 530  | 0.0000296320 | 120.10 | 0.526 | 2.067  |
| 1842 | CMR | 323  | 0.0000180587 | 154.77 | 0.678 | -0.033 |
| 1843 | CMN | 254  | 0.0000142010 | 131.67 | 0.577 | 0.300  |
| 1844 | CMD | 423  | 0.0000236497 | 129.20 | 0.566 | 0.300  |
| 1845 | CMC | 215  | 0.0000120205 | 124.53 | 0.546 | 2.300  |
| 1846 | CMQ | 297  | 0.0000166051 | 139.90 | 0.613 | 0.300  |
| 1847 | CME | 591  | 0.0000330425 | 137.50 | 0.603 | 0.300  |
| 1848 | CMG | 376  | 0.0000210219 | 111.73 | 0.490 | 1.333  |
| 1849 | CMH | 153  | 0.0000085541 | 143.43 | 0.629 | 0.400  |
| 1850 | CMI | 219  | 0.0000122442 | 144.73 | 0.634 | 2.967  |
| 1851 | CML | 638  | 0.0000356702 | 144.77 | 0.634 | 2.733  |
| 1852 | CMK | 409  | 0.0000228669 | 145.87 | 0.639 | 0.167  |
| 1853 | CMM | 124  | 0.0000069328 | 145.77 | 0.639 | 2.100  |
| 1854 | CMF | 236  | 0.0000131946 | 154.07 | 0.675 | 2.400  |
| 1855 | CMP | 247  | 0.0000138096 | 131.07 | 0.574 | 0.933  |
| 1856 | CMS | 398  | 0.0000222519 | 121.90 | 0.534 | 1.200  |
| 1857 | CMT | 320  | 0.0000178910 | 130.60 | 0.572 | 1.233  |
| 1858 | CMW | 72   | 0.0000040255 | 166.17 | 0.728 | 1.167  |
| 1859 | CMY | 279  | 0.0000155987 | 155.77 | 0.683 | 1.033  |
| 1860 | CMV | 424  | 0.0000237056 | 136.43 | 0.598 | 2.867  |
| 1861 | CFA | 757  | 0.0000423234 | 128.40 | 0.563 | 2.367  |
| 1862 | CFR | 817  | 0.0000456780 | 163.07 | 0.715 | 0.267  |
| 1863 | CFN | 496  | 0.0000277311 | 139.97 | 0.613 | 0.600  |
| 1864 | CFD | 684  | 0.0000382420 | 137.50 | 0.603 | 0.600  |
| 1865 | CFC | 552  | 0.0000308620 | 132.83 | 0.582 | 2.600  |
| 1866 | CFQ | 788  | 0.0000440566 | 148.20 | 0.649 | 0.600  |

|      |     |      |              |        |       |        |
|------|-----|------|--------------|--------|-------|--------|
| 1867 | CFE | 837  | 0.0000467962 | 145.80 | 0.639 | 0.600  |
| 1868 | CFG | 882  | 0.0000493121 | 120.03 | 0.526 | 1.633  |
| 1869 | CFH | 445  | 0.0000248797 | 151.73 | 0.665 | 0.700  |
| 1870 | CFI | 712  | 0.0000398075 | 153.03 | 0.671 | 3.267  |
| 1871 | CFL | 1782 | 0.0000996306 | 153.07 | 0.671 | 3.033  |
| 1872 | CFK | 543  | 0.0000303588 | 154.17 | 0.676 | 0.467  |
| 1873 | CFM | 263  | 0.0000147042 | 154.07 | 0.675 | 2.400  |
| 1874 | CFF | 620  | 0.0000346638 | 162.37 | 0.712 | 2.700  |
| 1875 | CFP | 944  | 0.0000527785 | 139.37 | 0.611 | 1.233  |
| 1876 | CFS | 1531 | 0.0000855973 | 130.20 | 0.571 | 1.500  |
| 1877 | CFT | 844  | 0.0000471875 | 138.90 | 0.609 | 1.533  |
| 1878 | CFW | 249  | 0.0000139214 | 174.47 | 0.765 | 1.467  |
| 1879 | CFY | 483  | 0.0000270042 | 164.07 | 0.719 | 1.333  |
| 1880 | CFV | 955  | 0.0000533935 | 144.73 | 0.634 | 3.167  |
| 1881 | CPA | 2200 | 0.0001230007 | 105.40 | 0.462 | 0.900  |
| 1882 | CPR | 1899 | 0.0001061720 | 140.07 | 0.614 | -1.200 |
| 1883 | CPN | 806  | 0.0000450630 | 116.97 | 0.513 | -0.867 |
| 1884 | CPD | 1304 | 0.0000729059 | 114.50 | 0.502 | -0.867 |
| 1885 | CPC | 681  | 0.0000380743 | 109.83 | 0.481 | 1.133  |
| 1886 | CPQ | 1235 | 0.0000690481 | 125.20 | 0.549 | -0.867 |
| 1887 | CPE | 2072 | 0.0001158443 | 122.80 | 0.538 | -0.867 |
| 1888 | CPG | 1985 | 0.0001109802 | 97.03  | 0.425 | 0.167  |
| 1889 | CPH | 834  | 0.0000466284 | 128.73 | 0.564 | -0.767 |
| 1890 | CPI | 886  | 0.0000495357 | 130.03 | 0.570 | 1.800  |
| 1891 | CPL | 2248 | 0.0001256843 | 130.07 | 0.570 | 1.567  |
| 1892 | CPK | 1007 | 0.0000563008 | 131.17 | 0.575 | -1.000 |
| 1893 | CPM | 413  | 0.0000230906 | 131.07 | 0.574 | 0.933  |
| 1894 | CPF | 866  | 0.0000484175 | 139.37 | 0.611 | 1.233  |
| 1895 | CPP | 2452 | 0.0001370899 | 116.37 | 0.510 | -0.233 |
| 1896 | CPS | 2291 | 0.0001280884 | 107.20 | 0.470 | 0.033  |
| 1897 | CPT | 1197 | 0.0000669236 | 115.90 | 0.508 | 0.067  |
| 1898 | CPW | 386  | 0.0000215810 | 151.47 | 0.664 | 0.000  |
| 1899 | CPY | 597  | 0.0000333779 | 141.07 | 0.618 | -0.133 |
| 1900 | CPV | 1649 | 0.0000921946 | 121.73 | 0.533 | 1.700  |
| 1901 | CSA | 2472 | 0.0001382080 | 96.23  | 0.422 | 1.167  |
| 1902 | CSR | 2096 | 0.0001171861 | 130.90 | 0.574 | -0.933 |
| 1903 | CSN | 1120 | 0.0000626185 | 107.80 | 0.472 | -0.600 |
| 1904 | CSD | 1750 | 0.0000978414 | 105.33 | 0.462 | -0.600 |
| 1905 | CSC | 1339 | 0.0000748627 | 100.67 | 0.441 | 1.400  |
| 1906 | CSQ | 1781 | 0.0000995746 | 116.03 | 0.508 | -0.600 |
| 1907 | CSE | 2606 | 0.0001456999 | 113.63 | 0.498 | -0.600 |
| 1908 | CSG | 2430 | 0.0001358598 | 87.87  | 0.385 | 0.433  |
| 1909 | CSH | 1219 | 0.0000681536 | 119.57 | 0.524 | -0.500 |
| 1910 | CSI | 1382 | 0.0000772668 | 120.87 | 0.530 | 2.067  |
| 1911 | CSL | 3503 | 0.0001958506 | 120.90 | 0.530 | 1.833  |
| 1912 | CSK | 1658 | 0.0000926978 | 122.00 | 0.535 | -0.733 |
| 1913 | CSM | 620  | 0.0000346638 | 121.90 | 0.534 | 1.200  |
| 1914 | CSF | 1340 | 0.0000749186 | 130.20 | 0.571 | 1.500  |
| 1915 | CSP | 2556 | 0.0001429044 | 107.20 | 0.470 | 0.033  |
| 1916 | CSS | 4222 | 0.0002360495 | 98.03  | 0.430 | 0.300  |
| 1917 | CST | 1708 | 0.0000954933 | 106.73 | 0.468 | 0.333  |
| 1918 | CSW | 511  | 0.0000285697 | 142.30 | 0.624 | 0.267  |

|      |     |      |              |        |       |        |
|------|-----|------|--------------|--------|-------|--------|
| 1919 | CSY | 799  | 0.0000446716 | 131.90 | 0.578 | 0.133  |
| 1920 | CSV | 2399 | 0.0001341266 | 112.57 | 0.493 | 1.967  |
| 1921 | CTA | 1468 | 0.0000820750 | 104.93 | 0.460 | 1.200  |
| 1922 | CTR | 1061 | 0.0000593199 | 139.60 | 0.612 | -0.900 |
| 1923 | CTN | 698  | 0.0000390248 | 116.50 | 0.511 | -0.567 |
| 1924 | CTD | 1121 | 0.0000626744 | 114.03 | 0.500 | -0.567 |
| 1925 | CTC | 845  | 0.0000472434 | 109.37 | 0.479 | 1.433  |
| 1926 | CTQ | 799  | 0.0000446716 | 124.73 | 0.547 | -0.567 |
| 1927 | CTE | 1286 | 0.0000718995 | 122.33 | 0.536 | -0.567 |
| 1928 | CTG | 1203 | 0.0000672590 | 96.57  | 0.423 | 0.467  |
| 1929 | CTH | 533  | 0.0000297997 | 128.27 | 0.562 | -0.467 |
| 1930 | CTI | 901  | 0.0000503744 | 129.57 | 0.568 | 2.100  |
| 1931 | CTL | 1882 | 0.0001052215 | 129.60 | 0.568 | 1.867  |
| 1932 | CTK | 904  | 0.0000505421 | 130.70 | 0.573 | -0.700 |
| 1933 | CTM | 398  | 0.0000222519 | 130.60 | 0.572 | 1.233  |
| 1934 | CTF | 806  | 0.0000450630 | 138.90 | 0.609 | 1.533  |
| 1935 | CTP | 1175 | 0.0000656935 | 115.90 | 0.508 | 0.067  |
| 1936 | CTS | 1676 | 0.0000937042 | 106.73 | 0.468 | 0.333  |
| 1937 | CTT | 878  | 0.0000490885 | 115.43 | 0.506 | 0.367  |
| 1938 | CTW | 325  | 0.0000181706 | 151.00 | 0.662 | 0.300  |
| 1939 | CTY | 579  | 0.0000323715 | 140.60 | 0.616 | 0.167  |
| 1940 | CTV | 1434 | 0.0000801741 | 121.27 | 0.531 | 2.000  |
| 1941 | CWA | 536  | 0.0000299674 | 140.50 | 0.616 | 1.133  |
| 1942 | CWR | 319  | 0.0000178351 | 175.17 | 0.768 | -0.967 |
| 1943 | CWN | 229  | 0.0000128033 | 152.07 | 0.666 | -0.633 |
| 1944 | CWD | 342  | 0.0000191210 | 149.60 | 0.656 | -0.633 |
| 1945 | CWC | 153  | 0.0000085541 | 144.93 | 0.635 | 1.367  |
| 1946 | CWQ | 235  | 0.0000131387 | 160.30 | 0.702 | -0.633 |
| 1947 | CWE | 362  | 0.0000202392 | 157.90 | 0.692 | -0.633 |
| 1948 | CWG | 398  | 0.0000222519 | 132.13 | 0.579 | 0.400  |
| 1949 | CWH | 211  | 0.0000117969 | 163.83 | 0.718 | -0.533 |
| 1950 | CWI | 211  | 0.0000117969 | 165.13 | 0.724 | 2.033  |
| 1951 | CWL | 568  | 0.0000317565 | 165.17 | 0.724 | 1.800  |
| 1952 | CWK | 385  | 0.0000215251 | 166.27 | 0.729 | -0.767 |
| 1953 | CWM | 141  | 0.0000078832 | 166.17 | 0.728 | 1.167  |
| 1954 | CWF | 200  | 0.0000111819 | 174.47 | 0.765 | 1.467  |
| 1955 | CWP | 273  | 0.0000152633 | 151.47 | 0.664 | 0.000  |
| 1956 | CWS | 384  | 0.0000214692 | 142.30 | 0.624 | 0.267  |
| 1957 | CWT | 273  | 0.0000152633 | 151.00 | 0.662 | 0.300  |
| 1958 | CWW | 75   | 0.0000041932 | 186.57 | 0.818 | 0.233  |
| 1959 | CWY | 132  | 0.0000073800 | 176.17 | 0.772 | 0.100  |
| 1960 | CWV | 334  | 0.0000186737 | 156.83 | 0.687 | 1.933  |
| 1961 | CYA | 544  | 0.0000304147 | 130.10 | 0.570 | 1.000  |
| 1962 | CYR | 676  | 0.0000377948 | 164.77 | 0.722 | -1.100 |
| 1963 | CYN | 495  | 0.0000276752 | 141.67 | 0.621 | -0.767 |
| 1964 | CYD | 484  | 0.0000270602 | 139.20 | 0.610 | -0.767 |
| 1965 | CYC | 338  | 0.0000188974 | 134.53 | 0.590 | 1.233  |
| 1966 | CYQ | 430  | 0.0000240410 | 149.90 | 0.657 | -0.767 |
| 1967 | CYE | 606  | 0.0000338811 | 147.50 | 0.646 | -0.767 |
| 1968 | CYG | 677  | 0.0000378507 | 121.73 | 0.533 | 0.267  |
| 1969 | CYH | 309  | 0.0000172760 | 153.43 | 0.672 | -0.667 |
| 1970 | CYI | 533  | 0.0000297997 | 154.73 | 0.678 | 1.900  |

|      |     |      |              |        |       |        |
|------|-----|------|--------------|--------|-------|--------|
| 1971 | CYL | 1033 | 0.0000577544 | 154.77 | 0.678 | 1.667  |
| 1972 | CYK | 497  | 0.0000277870 | 155.87 | 0.683 | -0.900 |
| 1973 | CYM | 215  | 0.0000120205 | 155.77 | 0.683 | 1.033  |
| 1974 | CYF | 442  | 0.0000247120 | 164.07 | 0.719 | 1.333  |
| 1975 | CYP | 437  | 0.0000244324 | 141.07 | 0.618 | -0.133 |
| 1976 | CYS | 984  | 0.0000550149 | 131.90 | 0.578 | 0.133  |
| 1977 | CYT | 523  | 0.0000292406 | 140.60 | 0.616 | 0.167  |
| 1978 | CYW | 140  | 0.0000078273 | 176.17 | 0.772 | 0.100  |
| 1979 | CYY | 382  | 0.0000213574 | 165.77 | 0.726 | -0.033 |
| 1980 | CYV | 580  | 0.0000324275 | 146.43 | 0.642 | 1.800  |
| 1981 | CVA | 1888 | 0.0001055569 | 110.77 | 0.485 | 2.833  |
| 1982 | CVR | 1273 | 0.0000711727 | 145.43 | 0.637 | 0.733  |
| 1983 | CVN | 1067 | 0.0000596553 | 122.33 | 0.536 | 1.067  |
| 1984 | CVD | 1174 | 0.0000656376 | 119.87 | 0.525 | 1.067  |
| 1985 | CVC | 1117 | 0.0000624508 | 115.20 | 0.505 | 3.067  |
| 1986 | CVQ | 901  | 0.0000503744 | 130.57 | 0.572 | 1.067  |
| 1987 | CVE | 1425 | 0.0000796709 | 128.17 | 0.562 | 1.067  |
| 1988 | CVG | 1222 | 0.0000683213 | 102.40 | 0.449 | 2.100  |
| 1989 | CVH | 684  | 0.0000382420 | 134.10 | 0.588 | 1.167  |
| 1990 | CVI | 944  | 0.0000527785 | 135.40 | 0.593 | 3.733  |
| 1991 | CVL | 2317 | 0.0001295421 | 135.43 | 0.593 | 3.500  |
| 1992 | CVK | 1065 | 0.0000595435 | 136.53 | 0.598 | 0.933  |
| 1993 | CVM | 356  | 0.0000199037 | 136.43 | 0.598 | 2.867  |
| 1994 | CVF | 858  | 0.0000479703 | 144.73 | 0.634 | 3.167  |
| 1995 | CVP | 1575 | 0.0000880573 | 121.73 | 0.533 | 1.700  |
| 1996 | CVS | 1974 | 0.0001103652 | 112.57 | 0.493 | 1.967  |
| 1997 | CVT | 1079 | 0.0000603262 | 121.27 | 0.531 | 2.000  |
| 1998 | CVW | 356  | 0.0000199037 | 156.83 | 0.687 | 1.933  |
| 1999 | CVY | 861  | 0.0000481380 | 146.43 | 0.642 | 1.800  |
| 2000 | CVV | 1630 | 0.0000911323 | 127.10 | 0.557 | 3.633  |
| 2001 | QAA | 6235 | 0.0003485951 | 109.80 | 0.481 | 0.033  |
| 2002 | QAR | 3716 | 0.0002077593 | 144.47 | 0.633 | -2.067 |
| 2003 | QAN | 1519 | 0.0000849264 | 121.37 | 0.532 | -1.733 |
| 2004 | QAD | 2093 | 0.0001170184 | 118.90 | 0.521 | -1.733 |
| 2005 | QAC | 1291 | 0.0000721790 | 114.23 | 0.501 | 0.267  |
| 2006 | QAQ | 4330 | 0.0002420877 | 129.60 | 0.568 | -1.733 |
| 2007 | QAE | 4712 | 0.0002634451 | 127.20 | 0.557 | -1.733 |
| 2008 | QAG | 4191 | 0.0002343163 | 101.43 | 0.444 | -0.700 |
| 2009 | QAH | 1559 | 0.0000871628 | 133.13 | 0.583 | -1.633 |
| 2010 | QAI | 2399 | 0.0001341266 | 134.43 | 0.589 | 0.933  |
| 2011 | QAL | 8024 | 0.0004486170 | 134.47 | 0.589 | 0.700  |
| 2012 | QAK | 2975 | 0.0001663305 | 135.57 | 0.594 | -1.867 |
| 2013 | QAM | 1418 | 0.0000792795 | 135.47 | 0.594 | 0.067  |
| 2014 | QAF | 2287 | 0.0001278648 | 143.77 | 0.630 | 0.367  |
| 2015 | QAP | 4119 | 0.0002302908 | 120.77 | 0.529 | -1.100 |
| 2016 | QAS | 4858 | 0.0002716079 | 111.60 | 0.489 | -0.833 |
| 2017 | QAT | 3011 | 0.0001683432 | 120.30 | 0.527 | -0.800 |
| 2018 | QAW | 963  | 0.0000538408 | 155.87 | 0.683 | -0.867 |
| 2019 | QAY | 1136 | 0.0000635131 | 145.47 | 0.637 | -1.000 |
| 2020 | QAV | 4017 | 0.0002245881 | 126.13 | 0.553 | 0.833  |
| 2021 | QRA | 3730 | 0.0002085421 | 144.47 | 0.633 | -2.067 |
| 2022 | QRR | 4339 | 0.0002425909 | 179.13 | 0.785 | -4.167 |

|      |     |      |              |        |       |        |
|------|-----|------|--------------|--------|-------|--------|
| 2023 | QRN | 1756 | 0.0000981769 | 156.03 | 0.684 | -3.833 |
| 2024 | QRD | 2009 | 0.0001123220 | 153.57 | 0.673 | -3.833 |
| 2025 | QRC | 1164 | 0.0000650785 | 148.90 | 0.652 | -1.833 |
| 2026 | QRQ | 3154 | 0.0001763382 | 164.27 | 0.720 | -3.833 |
| 2027 | QRE | 3701 | 0.0002069207 | 161.87 | 0.709 | -3.833 |
| 2028 | QRG | 3218 | 0.0001799164 | 136.10 | 0.596 | -2.800 |
| 2029 | QRH | 1519 | 0.0000849264 | 167.80 | 0.735 | -3.733 |
| 2030 | QRI | 3362 | 0.0001879674 | 169.10 | 0.741 | -1.167 |
| 2031 | QRL | 6428 | 0.0003593856 | 169.13 | 0.741 | -1.400 |
| 2032 | QRK | 3219 | 0.0001799724 | 170.23 | 0.746 | -3.967 |
| 2033 | QRM | 1208 | 0.0000675386 | 170.13 | 0.746 | -2.033 |
| 2034 | QRF | 1673 | 0.0000935364 | 178.43 | 0.782 | -1.733 |
| 2035 | QRP | 3151 | 0.0001761705 | 155.43 | 0.681 | -3.200 |
| 2036 | QRS | 3722 | 0.0002080948 | 146.27 | 0.641 | -2.933 |
| 2037 | QRT | 2780 | 0.0001554281 | 154.97 | 0.679 | -2.900 |
| 2038 | QRW | 740  | 0.0000413730 | 190.53 | 0.835 | -2.967 |
| 2039 | QRY | 1225 | 0.0000684890 | 180.13 | 0.789 | -3.100 |
| 2040 | QRV | 3387 | 0.0001893651 | 160.80 | 0.705 | -1.267 |
| 2041 | QNA | 1738 | 0.0000971705 | 121.37 | 0.532 | -1.733 |
| 2042 | QNR | 1726 | 0.0000964996 | 156.03 | 0.684 | -3.833 |
| 2043 | QNN | 1241 | 0.0000693836 | 132.93 | 0.583 | -3.500 |
| 2044 | QND | 1110 | 0.0000620594 | 130.47 | 0.572 | -3.500 |
| 2045 | QNC | 672  | 0.0000375711 | 125.80 | 0.551 | -1.500 |
| 2046 | QNQ | 1640 | 0.0000916914 | 141.17 | 0.619 | -3.500 |
| 2047 | QNE | 1876 | 0.0001048860 | 138.77 | 0.608 | -3.500 |
| 2048 | QNG | 2324 | 0.0001299334 | 113.00 | 0.495 | -2.467 |
| 2049 | QNH | 813  | 0.0000454543 | 144.70 | 0.634 | -3.400 |
| 2050 | QNI | 1782 | 0.0000996306 | 146.00 | 0.640 | -0.833 |
| 2051 | QNL | 3581 | 0.0002002116 | 146.03 | 0.640 | -1.067 |
| 2052 | QNK | 1915 | 0.0001070665 | 147.13 | 0.645 | -3.633 |
| 2053 | QNM | 741  | 0.0000414289 | 147.03 | 0.644 | -1.700 |
| 2054 | QNF | 1245 | 0.0000696072 | 155.33 | 0.681 | -1.400 |
| 2055 | QNP | 1945 | 0.0001087438 | 132.33 | 0.580 | -2.867 |
| 2056 | QNS | 2726 | 0.0001524090 | 123.17 | 0.540 | -2.600 |
| 2057 | QNT | 1685 | 0.0000942073 | 131.87 | 0.578 | -2.567 |
| 2058 | QNW | 411  | 0.0000229788 | 167.43 | 0.734 | -2.633 |
| 2059 | QNY | 863  | 0.0000482498 | 157.03 | 0.688 | -2.767 |
| 2060 | QNV | 1793 | 0.0001002456 | 137.70 | 0.603 | -0.933 |
| 2061 | QDA | 2592 | 0.0001449172 | 118.90 | 0.521 | -1.733 |
| 2062 | QDR | 1872 | 0.0001046624 | 153.57 | 0.673 | -3.833 |
| 2063 | QDN | 1218 | 0.0000680977 | 130.47 | 0.572 | -3.500 |
| 2064 | QDD | 1629 | 0.0000910764 | 128.00 | 0.561 | -3.500 |
| 2065 | QDC | 911  | 0.0000509335 | 123.33 | 0.540 | -1.500 |
| 2066 | QDQ | 1721 | 0.0000962201 | 138.70 | 0.608 | -3.500 |
| 2067 | QDE | 2462 | 0.0001376489 | 136.30 | 0.597 | -3.500 |
| 2068 | QDG | 2691 | 0.0001504522 | 110.53 | 0.484 | -2.467 |
| 2069 | QDH | 1021 | 0.0000570835 | 142.23 | 0.623 | -3.400 |
| 2070 | QDI | 2219 | 0.0001240630 | 143.53 | 0.629 | -0.833 |
| 2071 | QDL | 5074 | 0.0002836843 | 143.57 | 0.629 | -1.067 |
| 2072 | QDK | 2002 | 0.0001119306 | 144.67 | 0.634 | -3.633 |
| 2073 | QDM | 874  | 0.0000488648 | 144.57 | 0.634 | -1.700 |
| 2074 | QDF | 1691 | 0.0000945428 | 152.87 | 0.670 | -1.400 |



|      |     |      |              |        |       |        |
|------|-----|------|--------------|--------|-------|--------|
| 2075 | QDP | 2625 | 0.0001467622 | 129.87 | 0.569 | -2.867 |
| 2076 | QDS | 3706 | 0.0002072002 | 120.70 | 0.529 | -2.600 |
| 2077 | QDT | 2192 | 0.0001225534 | 129.40 | 0.567 | -2.567 |
| 2078 | QDW | 475  | 0.0000265570 | 164.97 | 0.723 | -2.633 |
| 2079 | QDY | 1078 | 0.0000602703 | 154.57 | 0.677 | -2.767 |
| 2080 | QDV | 2696 | 0.0001507317 | 135.23 | 0.593 | -0.933 |
| 2081 | QCA | 893  | 0.0000499271 | 114.23 | 0.501 | 0.267  |
| 2082 | QCR | 1082 | 0.0000604940 | 148.90 | 0.652 | -1.833 |
| 2083 | QCN | 622  | 0.0000347756 | 125.80 | 0.551 | -1.500 |
| 2084 | QCD | 656  | 0.0000366766 | 123.33 | 0.540 | -1.500 |
| 2085 | QCC | 550  | 0.0000307502 | 118.67 | 0.520 | 0.500  |
| 2086 | QCQ | 1189 | 0.0000664763 | 134.03 | 0.587 | -1.500 |
| 2087 | QCE | 903  | 0.0000504862 | 131.63 | 0.577 | -1.500 |
| 2088 | QCG | 1580 | 0.0000883368 | 105.87 | 0.464 | -0.467 |
| 2089 | QCH | 560  | 0.0000313093 | 137.57 | 0.603 | -1.400 |
| 2090 | QCI | 730  | 0.0000408139 | 138.87 | 0.609 | 1.167  |
| 2091 | QCL | 2041 | 0.0001141111 | 138.90 | 0.609 | 0.933  |
| 2092 | QCK | 857  | 0.0000479144 | 140.00 | 0.613 | -1.633 |
| 2093 | QCM | 260  | 0.0000145364 | 139.90 | 0.613 | 0.300  |
| 2094 | QCF | 565  | 0.0000315888 | 148.20 | 0.649 | 0.600  |
| 2095 | QCP | 1215 | 0.0000679299 | 125.20 | 0.549 | -0.867 |
| 2096 | QCS | 1444 | 0.0000807332 | 116.03 | 0.508 | -0.600 |
| 2097 | QCT | 682  | 0.0000381302 | 124.73 | 0.547 | -0.567 |
| 2098 | QCW | 268  | 0.0000149837 | 160.30 | 0.702 | -0.633 |
| 2099 | QCY | 337  | 0.0000188415 | 149.90 | 0.657 | -0.767 |
| 2100 | QCV | 1157 | 0.0000646872 | 130.57 | 0.572 | 1.067  |
| 2101 | QQA | 3587 | 0.0002005470 | 129.60 | 0.568 | -1.733 |
| 2102 | QQR | 3296 | 0.0001842774 | 164.27 | 0.720 | -3.833 |
| 2103 | QQN | 1714 | 0.0000958287 | 141.17 | 0.619 | -3.500 |
| 2104 | QQD | 1792 | 0.0001001896 | 138.70 | 0.608 | -3.500 |
| 2105 | QQC | 842  | 0.0000470757 | 134.03 | 0.587 | -1.500 |
| 2106 | QQQ | 7927 | 0.0004431938 | 149.40 | 0.655 | -3.500 |
| 2107 | QQE | 3810 | 0.0002130148 | 147.00 | 0.644 | -3.500 |
| 2108 | QQG | 2685 | 0.0001501167 | 121.23 | 0.531 | -2.467 |
| 2109 | QQH | 1571 | 0.0000878337 | 152.93 | 0.670 | -3.400 |
| 2110 | QQI | 2107 | 0.0001178011 | 154.23 | 0.676 | -0.833 |
| 2111 | QQJ | 6574 | 0.0003675484 | 154.27 | 0.676 | -1.067 |
| 2112 | QQK | 2772 | 0.0001549809 | 155.37 | 0.681 | -3.633 |
| 2113 | QQM | 1214 | 0.0000678740 | 155.27 | 0.680 | -1.700 |
| 2114 | QQF | 1428 | 0.0000798386 | 163.57 | 0.717 | -1.400 |
| 2115 | QQP | 3458 | 0.0001933347 | 140.57 | 0.616 | -2.867 |
| 2116 | QQS | 2752 | 0.0001538627 | 131.40 | 0.576 | -2.600 |
| 2117 | QQT | 2016 | 0.0001127134 | 140.10 | 0.614 | -2.567 |
| 2118 | QQW | 534  | 0.0000298556 | 175.67 | 0.770 | -2.633 |
| 2119 | QQY | 1125 | 0.0000628981 | 165.27 | 0.724 | -2.767 |
| 2120 | QQV | 2968 | 0.0001659391 | 145.93 | 0.639 | -0.933 |
| 2121 | QEA | 5837 | 0.0003263432 | 127.20 | 0.557 | -1.733 |
| 2122 | QER | 4041 | 0.0002259299 | 161.87 | 0.709 | -3.833 |
| 2123 | QEN | 2569 | 0.0001436312 | 138.77 | 0.608 | -3.500 |
| 2124 | QED | 3377 | 0.0001888061 | 136.30 | 0.597 | -3.500 |
| 2125 | QEC | 1084 | 0.0000606058 | 131.63 | 0.577 | -1.500 |
| 2126 | QEQ | 3796 | 0.0002122321 | 147.00 | 0.644 | -3.500 |

|      |     |      |              |        |       |        |
|------|-----|------|--------------|--------|-------|--------|
| 2127 | QEE | 7960 | 0.0004450388 | 144.60 | 0.634 | -3.500 |
| 2128 | QEG | 3926 | 0.0002195003 | 118.83 | 0.521 | -2.467 |
| 2129 | QEH | 1561 | 0.0000872746 | 150.53 | 0.660 | -3.400 |
| 2130 | QEI | 3061 | 0.0001711387 | 151.83 | 0.665 | -0.833 |
| 2131 | QEL | 7936 | 0.0004436970 | 151.87 | 0.665 | -1.067 |
| 2132 | QEK | 4755 | 0.0002658492 | 152.97 | 0.670 | -3.633 |
| 2133 | QEM | 1619 | 0.0000905173 | 152.87 | 0.670 | -1.700 |
| 2134 | QEF | 1970 | 0.0001101415 | 161.17 | 0.706 | -1.400 |
| 2135 | QEP | 3187 | 0.0001781833 | 138.17 | 0.605 | -2.867 |
| 2136 | QES | 4145 | 0.0002317445 | 129.00 | 0.565 | -2.600 |
| 2137 | QET | 3061 | 0.0001711387 | 137.70 | 0.603 | -2.567 |
| 2138 | QEW | 685  | 0.0000382979 | 173.27 | 0.759 | -2.633 |
| 2139 | QEY | 1578 | 0.0000882250 | 162.87 | 0.714 | -2.767 |
| 2140 | QEV | 4204 | 0.0002350431 | 143.53 | 0.629 | -0.933 |
| 2141 | QGA | 3753 | 0.0002098280 | 101.43 | 0.444 | -0.700 |
| 2142 | QGR | 3363 | 0.0001880233 | 136.10 | 0.596 | -2.800 |
| 2143 | QGN | 1815 | 0.0001014756 | 113.00 | 0.495 | -2.467 |
| 2144 | QGD | 2404 | 0.0001344062 | 110.53 | 0.484 | -2.467 |
| 2145 | QGC | 1240 | 0.0000693277 | 105.87 | 0.464 | -0.467 |
| 2146 | QGO | 3220 | 0.0001800283 | 121.23 | 0.531 | -2.467 |
| 2147 | QGE | 3261 | 0.0001823206 | 118.83 | 0.521 | -2.467 |
| 2148 | QGG | 3518 | 0.0001966893 | 93.07  | 0.408 | -1.433 |
| 2149 | QGH | 1594 | 0.0000891196 | 124.77 | 0.547 | -2.367 |
| 2150 | QGI | 2308 | 0.0001290389 | 126.07 | 0.552 | 0.200  |
| 2151 | QGL | 5771 | 0.0003226532 | 126.10 | 0.553 | -0.033 |
| 2152 | QGK | 2754 | 0.0001539745 | 127.20 | 0.557 | -2.600 |
| 2153 | QGM | 901  | 0.0000503744 | 127.10 | 0.557 | -0.667 |
| 2154 | QGF | 1921 | 0.0001074020 | 135.40 | 0.593 | -0.367 |
| 2155 | QGP | 4539 | 0.0002537728 | 112.40 | 0.493 | -1.833 |
| 2156 | QGS | 4614 | 0.0002579660 | 103.23 | 0.452 | -1.567 |
| 2157 | QGT | 2734 | 0.0001528563 | 111.93 | 0.491 | -1.533 |
| 2158 | QGW | 744  | 0.0000415966 | 147.50 | 0.646 | -1.600 |
| 2159 | QGY | 1289 | 0.0000720672 | 137.10 | 0.601 | -1.733 |
| 2160 | QGV | 2873 | 0.0001606277 | 117.77 | 0.516 | 0.100  |
| 2161 | QHA | 1138 | 0.0000636249 | 133.13 | 0.583 | -1.633 |
| 2162 | QHR | 1544 | 0.0000863241 | 167.80 | 0.735 | -3.733 |
| 2163 | QHN | 748  | 0.0000418202 | 144.70 | 0.634 | -3.400 |
| 2164 | QHD | 597  | 0.0000333779 | 142.23 | 0.623 | -3.400 |
| 2165 | QHC | 576  | 0.0000322038 | 137.57 | 0.603 | -1.400 |
| 2166 | QHQ | 2228 | 0.0001245661 | 152.93 | 0.670 | -3.400 |
| 2167 | QHE | 1240 | 0.0000693277 | 150.53 | 0.660 | -3.400 |
| 2168 | QHG | 1480 | 0.0000827459 | 124.77 | 0.547 | -2.367 |
| 2169 | QHH | 870  | 0.0000486412 | 156.47 | 0.686 | -3.300 |
| 2170 | QHI | 1204 | 0.0000673149 | 157.77 | 0.691 | -0.733 |
| 2171 | QHL | 3104 | 0.0001735428 | 157.80 | 0.691 | -0.967 |
| 2172 | QHK | 1124 | 0.0000628422 | 158.90 | 0.696 | -3.533 |
| 2173 | QHM | 482  | 0.0000269483 | 158.80 | 0.696 | -1.600 |
| 2174 | QHF | 956  | 0.0000534494 | 167.10 | 0.732 | -1.300 |
| 2175 | QHP | 1536 | 0.0000858768 | 144.10 | 0.631 | -2.767 |
| 2176 | QHS | 1780 | 0.0000995187 | 134.93 | 0.591 | -2.500 |
| 2177 | QHT | 903  | 0.0000504862 | 143.63 | 0.629 | -2.467 |
| 2178 | QHW | 352  | 0.0000196801 | 179.20 | 0.785 | -2.533 |

|      |     |       |              |        |       |        |
|------|-----|-------|--------------|--------|-------|--------|
| 2179 | QHY | 694   | 0.0000388011 | 168.80 | 0.740 | -2.667 |
| 2180 | QHV | 1403  | 0.0000784409 | 149.47 | 0.655 | -0.833 |
| 2181 | QIA | 1919  | 0.0001072901 | 134.43 | 0.589 | 0.933  |
| 2182 | QIR | 2055  | 0.0001148938 | 169.10 | 0.741 | -1.167 |
| 2183 | QIN | 1311  | 0.0000732972 | 146.00 | 0.640 | -0.833 |
| 2184 | QID | 1401  | 0.0000783291 | 143.53 | 0.629 | -0.833 |
| 2185 | QIC | 749   | 0.0000418761 | 138.87 | 0.609 | 1.167  |
| 2186 | QIQ | 2076  | 0.0001160679 | 154.23 | 0.676 | -0.833 |
| 2187 | QIE | 1847  | 0.0001032647 | 151.83 | 0.665 | -0.833 |
| 2188 | QIG | 1408  | 0.0000787204 | 126.07 | 0.552 | 0.200  |
| 2189 | QIH | 1063  | 0.0000594317 | 157.77 | 0.691 | -0.733 |
| 2190 | QII | 1798  | 0.0001005251 | 159.07 | 0.697 | 1.833  |
| 2191 | QIL | 4090  | 0.0002286695 | 159.10 | 0.697 | 1.600  |
| 2192 | QIK | 2042  | 0.0001141670 | 160.20 | 0.702 | -0.967 |
| 2193 | QIM | 713   | 0.0000398634 | 160.10 | 0.702 | 0.967  |
| 2194 | QIF | 1348  | 0.0000753659 | 168.40 | 0.738 | 1.267  |
| 2195 | QIP | 2040  | 0.0001140552 | 145.40 | 0.637 | -0.200 |
| 2196 | QIS | 2682  | 0.0001499490 | 136.23 | 0.597 | 0.067  |
| 2197 | QIT | 1887  | 0.0001055010 | 144.93 | 0.635 | 0.100  |
| 2198 | QIW | 463   | 0.0000258861 | 180.50 | 0.791 | 0.033  |
| 2199 | QIY | 972   | 0.0000543439 | 170.10 | 0.745 | -0.100 |
| 2200 | QIV | 1852  | 0.0001035442 | 150.77 | 0.661 | 1.733  |
| 2201 | QLA | 5581  | 0.0003120304 | 134.47 | 0.589 | 0.700  |
| 2202 | QLR | 5492  | 0.0003070544 | 169.13 | 0.741 | -1.400 |
| 2203 | QLN | 2597  | 0.0001451967 | 146.03 | 0.640 | -1.067 |
| 2204 | QLD | 3361  | 0.0001879115 | 143.57 | 0.629 | -1.067 |
| 2205 | QLC | 1837  | 0.0001027056 | 138.90 | 0.609 | 0.933  |
| 2206 | QLQ | 6345  | 0.0003547451 | 154.27 | 0.676 | -1.067 |
| 2207 | QLE | 6469  | 0.0003616779 | 151.87 | 0.665 | -1.067 |
| 2208 | QLG | 4195  | 0.0002345399 | 126.10 | 0.553 | -0.033 |
| 2209 | QLH | 2477  | 0.0001384876 | 157.80 | 0.691 | -0.967 |
| 2210 | QLI | 3052  | 0.0001706355 | 159.10 | 0.697 | 1.600  |
| 2211 | QLL | 10546 | 0.0005896206 | 159.13 | 0.697 | 1.367  |
| 2212 | QLK | 4714  | 0.0002635569 | 160.23 | 0.702 | -1.200 |
| 2213 | QLM | 1520  | 0.0000849823 | 160.13 | 0.702 | 0.733  |
| 2214 | QLF | 2932  | 0.0001639264 | 168.43 | 0.738 | 1.033  |
| 2215 | QLP | 4861  | 0.0002717756 | 145.43 | 0.637 | -0.433 |
| 2216 | QLS | 6433  | 0.0003596652 | 136.27 | 0.597 | -0.167 |
| 2217 | QLT | 4007  | 0.0002240290 | 144.97 | 0.635 | -0.133 |
| 2218 | QLW | 995   | 0.0000556299 | 180.53 | 0.791 | -0.200 |
| 2219 | QLY | 2037  | 0.0001138875 | 170.13 | 0.746 | -0.333 |
| 2220 | QLV | 4557  | 0.0002547791 | 150.80 | 0.661 | 1.500  |
| 2221 | QKA | 3690  | 0.0002063057 | 135.57 | 0.594 | -1.867 |
| 2222 | QKR | 2954  | 0.0001651564 | 170.23 | 0.746 | -3.967 |
| 2223 | QKN | 1726  | 0.0000964996 | 147.13 | 0.645 | -3.633 |
| 2224 | QKD | 2194  | 0.0001226652 | 144.67 | 0.634 | -3.633 |
| 2225 | QKC | 919   | 0.0000513807 | 140.00 | 0.613 | -1.633 |
| 2226 | QKQ | 2885  | 0.0001612986 | 155.37 | 0.681 | -3.633 |
| 2227 | QKE | 4291  | 0.0002399072 | 152.97 | 0.670 | -3.633 |
| 2228 | QKG | 2683  | 0.0001500049 | 127.20 | 0.557 | -2.600 |
| 2229 | QKH | 1255  | 0.0000701663 | 158.90 | 0.696 | -3.533 |
| 2230 | QKI | 2852  | 0.0001594536 | 160.20 | 0.702 | -0.967 |

|      |     |      |              |        |       |        |
|------|-----|------|--------------|--------|-------|--------|
| 2231 | QKL | 5743 | 0.0003210877 | 160.23 | 0.702 | -1.200 |
| 2232 | QKK | 3847 | 0.0002150835 | 161.33 | 0.707 | -3.767 |
| 2233 | QKM | 1144 | 0.0000639604 | 161.23 | 0.707 | -1.833 |
| 2234 | QKF | 1509 | 0.0000843673 | 169.53 | 0.743 | -1.533 |
| 2235 | QKP | 2288 | 0.0001279207 | 146.53 | 0.642 | -3.000 |
| 2236 | QKS | 3319 | 0.0001855633 | 137.37 | 0.602 | -2.733 |
| 2237 | QKT | 2756 | 0.0001540863 | 146.07 | 0.640 | -2.700 |
| 2238 | QKW | 585  | 0.0000327070 | 181.63 | 0.796 | -2.767 |
| 2239 | QKY | 1437 | 0.0000803418 | 171.23 | 0.750 | -2.900 |
| 2240 | QKV | 3137 | 0.0001753878 | 151.90 | 0.666 | -1.067 |
| 2241 | QMA | 1300 | 0.0000726822 | 135.47 | 0.594 | 0.067  |
| 2242 | QMR | 893  | 0.0000499271 | 170.13 | 0.746 | -2.033 |
| 2243 | QMN | 688  | 0.0000384657 | 147.03 | 0.644 | -1.700 |
| 2244 | QMD | 792  | 0.0000442802 | 144.57 | 0.634 | -1.700 |
| 2245 | QMC | 380  | 0.0000212456 | 139.90 | 0.613 | 0.300  |
| 2246 | QMQ | 965  | 0.0000539526 | 155.27 | 0.680 | -1.700 |
| 2247 | QME | 1441 | 0.0000805654 | 152.87 | 0.670 | -1.700 |
| 2248 | QMG | 813  | 0.0000454543 | 127.10 | 0.557 | -0.667 |
| 2249 | QMH | 413  | 0.0000230906 | 158.80 | 0.696 | -1.600 |
| 2250 | QMI | 708  | 0.0000395839 | 160.10 | 0.702 | 0.967  |
| 2251 | QML | 2038 | 0.0001139434 | 160.13 | 0.702 | 0.733  |
| 2252 | QMK | 1146 | 0.0000640722 | 161.23 | 0.707 | -1.833 |
| 2253 | QMM | 422  | 0.0000235938 | 161.13 | 0.706 | 0.100  |
| 2254 | QMF | 668  | 0.0000373475 | 169.43 | 0.742 | 0.400  |
| 2255 | QMP | 933  | 0.0000521635 | 146.43 | 0.642 | -1.067 |
| 2256 | QMS | 1164 | 0.0000650785 | 137.27 | 0.602 | -0.800 |
| 2257 | QMT | 855  | 0.0000478025 | 145.97 | 0.640 | -0.767 |
| 2258 | QMW | 244  | 0.0000136419 | 181.53 | 0.796 | -0.833 |
| 2259 | QMY | 426  | 0.0000238174 | 171.13 | 0.750 | -0.967 |
| 2260 | QMV | 1039 | 0.0000580899 | 151.80 | 0.665 | 0.867  |
| 2261 | QFA | 1232 | 0.0000688804 | 143.77 | 0.630 | 0.367  |
| 2262 | QFR | 1321 | 0.0000738563 | 178.43 | 0.782 | -1.733 |
| 2263 | QFN | 822  | 0.0000459575 | 155.33 | 0.681 | -1.400 |
| 2264 | QFD | 859  | 0.0000480262 | 152.87 | 0.670 | -1.400 |
| 2265 | QFC | 629  | 0.0000351670 | 148.20 | 0.649 | 0.600  |
| 2266 | QFQ | 1332 | 0.0000744713 | 163.57 | 0.717 | -1.400 |
| 2267 | QFE | 1213 | 0.0000678181 | 161.17 | 0.706 | -1.400 |
| 2268 | QFG | 1280 | 0.0000715640 | 135.40 | 0.593 | -0.367 |
| 2269 | QFH | 770  | 0.0000430502 | 167.10 | 0.732 | -1.300 |
| 2270 | QFI | 1068 | 0.0000597112 | 168.40 | 0.738 | 1.267  |
| 2271 | QFL | 3045 | 0.0001702441 | 168.43 | 0.738 | 1.033  |
| 2272 | QFK | 1151 | 0.0000643517 | 169.53 | 0.743 | -1.533 |
| 2273 | QFM | 485  | 0.0000271161 | 169.43 | 0.742 | 0.400  |
| 2274 | QFF | 1085 | 0.0000606617 | 177.73 | 0.779 | 0.700  |
| 2275 | QFP | 1362 | 0.0000761486 | 154.73 | 0.678 | -0.767 |
| 2276 | QFS | 2050 | 0.0001146143 | 145.57 | 0.638 | -0.500 |
| 2277 | QFT | 1215 | 0.0000679299 | 154.27 | 0.676 | -0.467 |
| 2278 | QFW | 307  | 0.0000171642 | 189.83 | 0.832 | -0.533 |
| 2279 | QFY | 732  | 0.0000409257 | 179.43 | 0.786 | -0.667 |
| 2280 | QFV | 1389 | 0.0000776582 | 160.10 | 0.702 | 1.167  |
| 2281 | QPA | 3770 | 0.0002107784 | 120.77 | 0.529 | -1.100 |
| 2282 | QPR | 2879 | 0.0001609632 | 155.43 | 0.681 | -3.200 |

|      |     |      |              |        |       |        |
|------|-----|------|--------------|--------|-------|--------|
| 2283 | QPN | 1273 | 0.0000711727 | 132.33 | 0.580 | -2.867 |
| 2284 | QPD | 1836 | 0.0001026497 | 129.87 | 0.569 | -2.867 |
| 2285 | QPC | 1155 | 0.0000645754 | 125.20 | 0.549 | -0.867 |
| 2286 | QPQ | 3576 | 0.0001999320 | 140.57 | 0.616 | -2.867 |
| 2287 | QPE | 2957 | 0.0001653241 | 138.17 | 0.605 | -2.867 |
| 2288 | QPG | 4521 | 0.0002527664 | 112.40 | 0.493 | -1.833 |
| 2289 | QPH | 1561 | 0.0000872746 | 144.10 | 0.631 | -2.767 |
| 2290 | QPI | 1626 | 0.0000909087 | 145.40 | 0.637 | -0.200 |
| 2291 | QPL | 5397 | 0.0003017430 | 145.43 | 0.637 | -0.433 |
| 2292 | QPK | 1929 | 0.0001078492 | 146.53 | 0.642 | -3.000 |
| 2293 | QPM | 867  | 0.0000484734 | 146.43 | 0.642 | -1.067 |
| 2294 | QPF | 1457 | 0.0000814600 | 154.73 | 0.678 | -0.767 |
| 2295 | QPP | 6110 | 0.0003416064 | 131.73 | 0.577 | -2.233 |
| 2296 | QPS | 4738 | 0.0002648987 | 122.57 | 0.537 | -1.967 |
| 2297 | QPT | 2429 | 0.0001358039 | 131.27 | 0.575 | -1.933 |
| 2298 | QPW | 715  | 0.0000399752 | 166.83 | 0.731 | -2.000 |
| 2299 | QPY | 1219 | 0.0000681536 | 156.43 | 0.686 | -2.133 |
| 2300 | QPV | 3156 | 0.0001764501 | 137.10 | 0.601 | -0.300 |
| 2301 | QSA | 3242 | 0.0001812583 | 111.60 | 0.489 | -0.833 |
| 2302 | QSR | 3095 | 0.0001730396 | 146.27 | 0.641 | -2.933 |
| 2303 | QSN | 1519 | 0.0000849264 | 123.17 | 0.540 | -2.600 |
| 2304 | QSD | 1905 | 0.0001065074 | 120.70 | 0.529 | -2.600 |
| 2305 | QSC | 1252 | 0.0000699986 | 116.03 | 0.508 | -0.600 |
| 2306 | QSQ | 3137 | 0.0001753878 | 131.40 | 0.576 | -2.600 |
| 2307 | QSE | 3003 | 0.0001678959 | 129.00 | 0.565 | -2.600 |
| 2308 | QSG | 3188 | 0.0001782392 | 103.23 | 0.452 | -1.567 |
| 2309 | QSH | 1488 | 0.0000831932 | 134.93 | 0.591 | -2.500 |
| 2310 | QSI | 2356 | 0.0001317225 | 136.23 | 0.597 | 0.067  |
| 2311 | QSL | 6526 | 0.0003648647 | 136.27 | 0.597 | -0.167 |
| 2312 | QSK | 2649 | 0.0001481040 | 137.37 | 0.602 | -2.733 |
| 2313 | QSM | 977  | 0.0000546235 | 137.27 | 0.602 | -0.800 |
| 2314 | QSF | 2075 | 0.0001160120 | 145.57 | 0.638 | -0.500 |
| 2315 | QSP | 4514 | 0.0002523750 | 122.57 | 0.537 | -1.967 |
| 2316 | QSS | 6352 | 0.0003551365 | 113.40 | 0.497 | -1.700 |
| 2317 | QST | 2740 | 0.0001531918 | 122.10 | 0.535 | -1.667 |
| 2318 | QSW | 764  | 0.0000427148 | 157.67 | 0.691 | -1.733 |
| 2319 | QSY | 1339 | 0.0000748627 | 147.27 | 0.645 | -1.867 |
| 2320 | QSV | 3199 | 0.0001788542 | 127.93 | 0.561 | -0.033 |
| 2321 | QTA | 2662 | 0.0001488308 | 120.30 | 0.527 | -0.800 |
| 2322 | QTR | 1993 | 0.0001114274 | 154.97 | 0.679 | -2.900 |
| 2323 | QTN | 1156 | 0.0000646313 | 131.87 | 0.578 | -2.567 |
| 2324 | QTD | 1597 | 0.0000892873 | 129.40 | 0.567 | -2.567 |
| 2325 | QTC | 826  | 0.0000461812 | 124.73 | 0.547 | -0.567 |
| 2326 | QTO | 2168 | 0.0001212116 | 140.10 | 0.614 | -2.567 |
| 2327 | QTE | 2449 | 0.0001369221 | 137.70 | 0.603 | -2.567 |
| 2328 | QTG | 2350 | 0.0001313871 | 111.93 | 0.491 | -1.533 |
| 2329 | QTH | 1136 | 0.0000635131 | 143.63 | 0.629 | -2.467 |
| 2330 | QTI | 1662 | 0.0000929214 | 144.93 | 0.635 | 0.100  |
| 2331 | QTL | 4976 | 0.0002782052 | 144.97 | 0.635 | -0.133 |
| 2332 | QTK | 1882 | 0.0001052215 | 146.07 | 0.640 | -2.700 |
| 2333 | QTM | 806  | 0.0000450630 | 145.97 | 0.640 | -0.767 |
| 2334 | QTF | 1538 | 0.0000859887 | 154.27 | 0.676 | -0.467 |

|      |     |      |              |        |       |        |
|------|-----|------|--------------|--------|-------|--------|
| 2335 | QTP | 3032 | 0.0001695173 | 131.27 | 0.575 | -1.933 |
| 2336 | QTS | 3171 | 0.0001772887 | 122.10 | 0.535 | -1.667 |
| 2337 | QTT | 2054 | 0.0001148379 | 130.80 | 0.573 | -1.633 |
| 2338 | QTW | 575  | 0.0000321479 | 166.37 | 0.729 | -1.700 |
| 2339 | QTY | 1095 | 0.0000612208 | 155.97 | 0.683 | -1.833 |
| 2340 | QTV | 2777 | 0.0001552604 | 136.63 | 0.599 | 0.000  |
| 2341 | QWA | 550  | 0.0000307502 | 155.87 | 0.683 | -0.867 |
| 2342 | QWR | 582  | 0.0000325393 | 190.53 | 0.835 | -2.967 |
| 2343 | QWN | 401  | 0.0000224197 | 167.43 | 0.734 | -2.633 |
| 2344 | QWD | 450  | 0.0000251592 | 164.97 | 0.723 | -2.633 |
| 2345 | QWC | 212  | 0.0000118528 | 160.30 | 0.702 | -0.633 |
| 2346 | QWQ | 473  | 0.0000264451 | 175.67 | 0.770 | -2.633 |
| 2347 | QWE | 700  | 0.0000391366 | 173.27 | 0.759 | -2.633 |
| 2348 | QWG | 466  | 0.0000260538 | 147.50 | 0.646 | -1.600 |
| 2349 | QWH | 302  | 0.0000168846 | 179.20 | 0.785 | -2.533 |
| 2350 | QWI | 410  | 0.0000229229 | 180.50 | 0.791 | 0.033  |
| 2351 | QWL | 1326 | 0.0000741359 | 180.53 | 0.791 | -0.200 |
| 2352 | QWK | 728  | 0.0000407020 | 181.63 | 0.796 | -2.767 |
| 2353 | QWM | 216  | 0.0000120764 | 181.53 | 0.796 | -0.833 |
| 2354 | QWF | 381  | 0.0000213015 | 189.83 | 0.832 | -0.533 |
| 2355 | QWP | 474  | 0.0000265011 | 166.83 | 0.731 | -2.000 |
| 2356 | QWS | 624  | 0.0000348875 | 157.67 | 0.691 | -1.733 |
| 2357 | QWT | 509  | 0.0000284579 | 166.37 | 0.729 | -1.700 |
| 2358 | QWW | 140  | 0.0000078273 | 201.93 | 0.885 | -1.767 |
| 2359 | QWY | 284  | 0.0000158783 | 191.53 | 0.839 | -1.900 |
| 2360 | QWV | 601  | 0.0000336016 | 172.20 | 0.755 | -0.067 |
| 2361 | QYA | 898  | 0.0000502066 | 145.47 | 0.637 | -1.000 |
| 2362 | QYR | 1241 | 0.0000693836 | 180.13 | 0.789 | -3.100 |
| 2363 | QYN | 623  | 0.0000348316 | 157.03 | 0.688 | -2.767 |
| 2364 | QYD | 771  | 0.0000431061 | 154.57 | 0.677 | -2.767 |
| 2365 | QYC | 452  | 0.0000252710 | 149.90 | 0.657 | -0.767 |
| 2366 | QYQ | 1130 | 0.0000631776 | 165.27 | 0.724 | -2.767 |
| 2367 | QYE | 1188 | 0.0000664204 | 162.87 | 0.714 | -2.767 |
| 2368 | QYG | 1061 | 0.0000593199 | 137.10 | 0.601 | -1.733 |
| 2369 | QYH | 589  | 0.0000329306 | 168.80 | 0.740 | -2.667 |
| 2370 | QYI | 971  | 0.0000542880 | 170.10 | 0.745 | -0.100 |
| 2371 | QYL | 2324 | 0.0001299334 | 170.13 | 0.746 | -0.333 |
| 2372 | QYK | 975  | 0.0000545117 | 171.23 | 0.750 | -2.900 |
| 2373 | QYM | 376  | 0.0000210219 | 171.13 | 0.750 | -0.967 |
| 2374 | QYF | 957  | 0.0000535053 | 179.43 | 0.786 | -0.667 |
| 2375 | QYP | 997  | 0.0000557417 | 156.43 | 0.686 | -2.133 |
| 2376 | QYS | 1536 | 0.0000858768 | 147.27 | 0.645 | -1.867 |
| 2377 | QYT | 838  | 0.0000468521 | 155.97 | 0.683 | -1.833 |
| 2378 | QYW | 354  | 0.0000197919 | 191.53 | 0.839 | -1.900 |
| 2379 | QYY | 695  | 0.0000388570 | 181.13 | 0.794 | -2.033 |
| 2380 | QYV | 1082 | 0.0000604940 | 161.80 | 0.709 | -0.200 |
| 2381 | QVA | 3772 | 0.0002108903 | 126.13 | 0.553 | 0.833  |
| 2382 | QVR | 2400 | 0.0001341826 | 160.80 | 0.705 | -1.267 |
| 2383 | QVN | 1471 | 0.0000822427 | 137.70 | 0.603 | -0.933 |
| 2384 | QVD | 2156 | 0.0001205407 | 135.23 | 0.593 | -0.933 |
| 2385 | QVC | 1026 | 0.0000573630 | 130.57 | 0.572 | 1.067  |
| 2386 | QVQ | 2735 | 0.0001529122 | 145.93 | 0.639 | -0.933 |

|      |     |       |              |        |       |        |
|------|-----|-------|--------------|--------|-------|--------|
| 2387 | QVE | 3410  | 0.0001906511 | 143.53 | 0.629 | -0.933 |
| 2388 | QVG | 2429  | 0.0001358039 | 117.77 | 0.516 | 0.100  |
| 2389 | QVH | 1387  | 0.0000775463 | 149.47 | 0.655 | -0.833 |
| 2390 | QVI | 2401  | 0.0001342385 | 150.77 | 0.661 | 1.733  |
| 2391 | QVL | 5937  | 0.0003319341 | 150.80 | 0.661 | 1.500  |
| 2392 | QVK | 2787  | 0.0001558195 | 151.90 | 0.666 | -1.067 |
| 2393 | QVM | 915   | 0.0000511571 | 151.80 | 0.665 | 0.867  |
| 2394 | QVF | 1997  | 0.0001116511 | 160.10 | 0.702 | 1.167  |
| 2395 | QVP | 3213  | 0.0001796369 | 137.10 | 0.601 | -0.300 |
| 2396 | QVS | 3852  | 0.0002153630 | 127.93 | 0.561 | -0.033 |
| 2397 | QVT | 3211  | 0.0001795251 | 136.63 | 0.599 | 0.000  |
| 2398 | QVW | 691   | 0.0000386334 | 172.20 | 0.755 | -0.067 |
| 2399 | QVY | 1304  | 0.0000729059 | 161.80 | 0.709 | -0.200 |
| 2400 | QVV | 3252  | 0.0001818174 | 142.47 | 0.624 | 1.633  |
| 2401 | EAA | 9515  | 0.0005319779 | 107.40 | 0.471 | 0.033  |
| 2402 | EAR | 5308  | 0.0002967671 | 142.07 | 0.623 | -2.067 |
| 2403 | EAN | 2179  | 0.0001218266 | 118.97 | 0.521 | -1.733 |
| 2404 | EAD | 3560  | 0.0001990375 | 116.50 | 0.511 | -1.733 |
| 2405 | EAC | 1849  | 0.0001033765 | 111.83 | 0.490 | 0.267  |
| 2406 | EAQ | 4896  | 0.0002737324 | 127.20 | 0.557 | -1.733 |
| 2407 | EAE | 9016  | 0.0005040792 | 124.80 | 0.547 | -1.733 |
| 2408 | EAG | 6383  | 0.0003568697 | 99.03  | 0.434 | -0.700 |
| 2409 | EAH | 1844  | 0.0001030969 | 130.73 | 0.573 | -1.633 |
| 2410 | EAI | 3798  | 0.0002123439 | 132.03 | 0.579 | 0.933  |
| 2411 | EAL | 10869 | 0.0006076792 | 132.07 | 0.579 | 0.700  |
| 2412 | EAK | 4909  | 0.0002744592 | 133.17 | 0.584 | -1.867 |
| 2413 | EAM | 2056  | 0.0001149497 | 133.07 | 0.583 | 0.067  |
| 2414 | EAF | 3433  | 0.0001919370 | 141.37 | 0.619 | 0.367  |
| 2415 | EAP | 5155  | 0.0002882130 | 118.37 | 0.519 | -1.100 |
| 2416 | EAS | 6543  | 0.0003658152 | 109.20 | 0.479 | -0.833 |
| 2417 | EAT | 4486  | 0.0002508096 | 117.90 | 0.517 | -0.800 |
| 2418 | EAW | 1241  | 0.0000693836 | 153.47 | 0.673 | -0.867 |
| 2419 | EAY | 1760  | 0.0000984005 | 143.07 | 0.627 | -1.000 |
| 2420 | EAV | 6382  | 0.0003568138 | 123.73 | 0.542 | 0.833  |
| 2421 | ERA | 5070  | 0.0002834607 | 142.07 | 0.623 | -2.067 |
| 2422 | ERR | 5724  | 0.0003200254 | 176.73 | 0.774 | -4.167 |
| 2423 | ERN | 2377  | 0.0001328966 | 153.63 | 0.673 | -3.833 |
| 2424 | ERD | 3393  | 0.0001897006 | 151.17 | 0.662 | -3.833 |
| 2425 | ERC | 1369  | 0.0000765400 | 146.50 | 0.642 | -1.833 |
| 2426 | ERQ | 3340  | 0.0001867374 | 161.87 | 0.709 | -3.833 |
| 2427 | ERE | 6690  | 0.0003740339 | 159.47 | 0.699 | -3.833 |
| 2428 | ERG | 4582  | 0.0002561769 | 133.70 | 0.586 | -2.800 |
| 2429 | ERH | 1694  | 0.0000947105 | 165.40 | 0.725 | -3.733 |
| 2430 | ERI | 3292  | 0.0001840537 | 166.70 | 0.730 | -1.167 |
| 2431 | ERL | 7969  | 0.0004455420 | 166.73 | 0.731 | -1.400 |
| 2432 | ERK | 4527  | 0.0002531018 | 167.83 | 0.735 | -3.967 |
| 2433 | ERM | 1512  | 0.0000845350 | 167.73 | 0.735 | -2.033 |
| 2434 | ERF | 2216  | 0.0001238952 | 176.03 | 0.771 | -1.733 |
| 2435 | ERP | 4346  | 0.0002429822 | 153.03 | 0.671 | -3.200 |
| 2436 | ERS | 4381  | 0.0002449391 | 143.87 | 0.630 | -2.933 |
| 2437 | ERT | 3145  | 0.0001758351 | 152.57 | 0.669 | -2.900 |
| 2438 | ERW | 842   | 0.0000470757 | 188.13 | 0.824 | -2.967 |

|      |     |      |              |        |       |        |
|------|-----|------|--------------|--------|-------|--------|
| 2439 | ERY | 1606 | 0.0000897905 | 177.73 | 0.779 | -3.100 |
| 2440 | ERV | 3892 | 0.0002175994 | 158.40 | 0.694 | -1.267 |
| 2441 | ENA | 2923 | 0.0001634232 | 118.97 | 0.521 | -1.733 |
| 2442 | ENR | 2484 | 0.0001388790 | 153.63 | 0.673 | -3.833 |
| 2443 | ENN | 2129 | 0.0001190311 | 130.53 | 0.572 | -3.500 |
| 2444 | END | 2259 | 0.0001262993 | 128.07 | 0.561 | -3.500 |
| 2445 | ENC | 1208 | 0.0000675386 | 123.40 | 0.541 | -1.500 |
| 2446 | ENQ | 2434 | 0.0001360835 | 138.77 | 0.608 | -3.500 |
| 2447 | ENE | 4173 | 0.0002333099 | 136.37 | 0.598 | -3.500 |
| 2448 | ENG | 3855 | 0.0002155307 | 110.60 | 0.485 | -2.467 |
| 2449 | ENH | 1268 | 0.0000708931 | 142.30 | 0.624 | -3.400 |
| 2450 | ENI | 3383 | 0.0001891415 | 143.60 | 0.629 | -0.833 |
| 2451 | ENL | 5703 | 0.0003188513 | 143.63 | 0.629 | -1.067 |
| 2452 | ENK | 3423 | 0.0001913779 | 144.73 | 0.634 | -3.633 |
| 2453 | ENM | 1301 | 0.0000727381 | 144.63 | 0.634 | -1.700 |
| 2454 | ENF | 2250 | 0.0001257962 | 152.93 | 0.670 | -1.400 |
| 2455 | ENP | 2735 | 0.0001529122 | 129.93 | 0.569 | -2.867 |
| 2456 | ENS | 4202 | 0.0002349313 | 120.77 | 0.529 | -2.600 |
| 2457 | ENT | 2566 | 0.0001434635 | 129.47 | 0.567 | -2.567 |
| 2458 | ENW | 576  | 0.0000322038 | 165.03 | 0.723 | -2.633 |
| 2459 | ENY | 1776 | 0.0000992951 | 154.63 | 0.678 | -2.767 |
| 2460 | ENV | 3298 | 0.0001843892 | 135.30 | 0.593 | -0.933 |
| 2461 | EDA | 5098 | 0.0002850261 | 116.50 | 0.511 | -1.733 |
| 2462 | EDR | 3172 | 0.0001773446 | 151.17 | 0.662 | -3.833 |
| 2463 | EDN | 2115 | 0.0001182484 | 128.07 | 0.561 | -3.500 |
| 2464 | EDD | 5118 | 0.0002861443 | 125.60 | 0.550 | -3.500 |
| 2465 | EDC | 1648 | 0.0000921387 | 120.93 | 0.530 | -1.500 |
| 2466 | EDQ | 2810 | 0.0001571054 | 136.30 | 0.597 | -3.500 |
| 2467 | EDE | 7705 | 0.0004307819 | 133.90 | 0.587 | -3.500 |
| 2468 | EDG | 5572 | 0.0003115272 | 108.13 | 0.474 | -2.467 |
| 2469 | EDH | 1370 | 0.0000765959 | 139.83 | 0.613 | -3.400 |
| 2470 | EDI | 3887 | 0.0002173198 | 141.13 | 0.618 | -0.833 |
| 2471 | EDL | 7878 | 0.0004404543 | 141.17 | 0.619 | -1.067 |
| 2472 | EDK | 3747 | 0.0002094925 | 142.27 | 0.623 | -3.633 |
| 2473 | EDM | 1670 | 0.0000933687 | 142.17 | 0.623 | -1.700 |
| 2474 | EDF | 3259 | 0.0001822087 | 150.47 | 0.659 | -1.400 |
| 2475 | EDP | 3993 | 0.0002232462 | 127.47 | 0.559 | -2.867 |
| 2476 | EDS | 6146 | 0.0003436192 | 118.30 | 0.518 | -2.600 |
| 2477 | EDT | 3572 | 0.0001997084 | 127.00 | 0.557 | -2.567 |
| 2478 | EDW | 945  | 0.0000528344 | 162.57 | 0.712 | -2.633 |
| 2479 | EDY | 2209 | 0.0001235039 | 152.17 | 0.667 | -2.767 |
| 2480 | EDV | 4775 | 0.0002669674 | 132.83 | 0.582 | -0.933 |
| 2481 | ECA | 1271 | 0.0000710608 | 111.83 | 0.490 | 0.267  |
| 2482 | ECR | 1543 | 0.0000862682 | 146.50 | 0.642 | -1.833 |
| 2483 | ECN | 1200 | 0.0000670913 | 123.40 | 0.541 | -1.500 |
| 2484 | ECD | 1143 | 0.0000639044 | 120.93 | 0.530 | -1.500 |
| 2485 | ECC | 508  | 0.0000284020 | 116.27 | 0.509 | 0.500  |
| 2486 | ECQ | 1109 | 0.0000620035 | 131.63 | 0.577 | -1.500 |
| 2487 | ECE | 1663 | 0.0000929773 | 129.23 | 0.566 | -1.500 |
| 2488 | ECG | 5998 | 0.0003353446 | 103.47 | 0.453 | -0.467 |
| 2489 | ECH | 656  | 0.0000366766 | 135.17 | 0.592 | -1.400 |
| 2490 | ECI | 953  | 0.0000532817 | 136.47 | 0.598 | 1.167  |



|      |     |       |              |        |       |        |
|------|-----|-------|--------------|--------|-------|--------|
| 2491 | ECL | 2441  | 0.0001364748 | 136.50 | 0.598 | 0.933  |
| 2492 | ECK | 2026  | 0.0001132724 | 137.60 | 0.603 | -1.633 |
| 2493 | ECM | 429   | 0.0000239851 | 137.50 | 0.603 | 0.300  |
| 2494 | ECF | 743   | 0.0000415407 | 145.80 | 0.639 | 0.600  |
| 2495 | ECP | 1339  | 0.0000748627 | 122.80 | 0.538 | -0.867 |
| 2496 | ECS | 2173  | 0.0001214911 | 113.63 | 0.498 | -0.600 |
| 2497 | ECT | 1003  | 0.0000560771 | 122.33 | 0.536 | -0.567 |
| 2498 | ECW | 247   | 0.0000138096 | 157.90 | 0.692 | -0.633 |
| 2499 | ECY | 530   | 0.0000296320 | 147.50 | 0.646 | -0.767 |
| 2500 | ECV | 1465  | 0.0000819073 | 128.17 | 0.562 | 1.067  |
| 2501 | EQA | 3823  | 0.0002137416 | 127.20 | 0.557 | -1.733 |
| 2502 | EQR | 3510  | 0.0001962420 | 161.87 | 0.709 | -3.833 |
| 2503 | EQN | 1719  | 0.0000961083 | 138.77 | 0.608 | -3.500 |
| 2504 | EQD | 2306  | 0.0001289271 | 136.30 | 0.597 | -3.500 |
| 2505 | EQC | 998   | 0.0000557976 | 131.63 | 0.577 | -1.500 |
| 2506 | EQQ | 3484  | 0.0001947883 | 147.00 | 0.644 | -3.500 |
| 2507 | EQE | 5677  | 0.0003173977 | 144.60 | 0.634 | -3.500 |
| 2508 | EQG | 3282  | 0.0001834946 | 118.83 | 0.521 | -2.467 |
| 2509 | EQH | 1205  | 0.0000673708 | 150.53 | 0.660 | -3.400 |
| 2510 | EQI | 2653  | 0.0001483276 | 151.83 | 0.665 | -0.833 |
| 2511 | EQL | 6936  | 0.0003877876 | 151.87 | 0.665 | -1.067 |
| 2512 | EQK | 3229  | 0.0001805315 | 152.97 | 0.670 | -3.633 |
| 2513 | EQM | 1308  | 0.0000731295 | 152.87 | 0.670 | -1.700 |
| 2514 | EQF | 1780  | 0.0000995187 | 161.17 | 0.706 | -1.400 |
| 2515 | EQP | 2589  | 0.0001447494 | 138.17 | 0.605 | -2.867 |
| 2516 | EQS | 3010  | 0.0001682873 | 129.00 | 0.565 | -2.600 |
| 2517 | EQT | 2015  | 0.0001126574 | 137.70 | 0.603 | -2.567 |
| 2518 | EQW | 625   | 0.0000349434 | 173.27 | 0.759 | -2.633 |
| 2519 | EQY | 1344  | 0.0000751422 | 162.87 | 0.714 | -2.767 |
| 2520 | EQV | 3178  | 0.0001776801 | 143.53 | 0.629 | -0.933 |
| 2521 | EEA | 10224 | 0.0005716177 | 124.80 | 0.547 | -1.733 |
| 2522 | EER | 7023  | 0.0003926517 | 159.47 | 0.699 | -3.833 |
| 2523 | EEN | 4848  | 0.0002710488 | 136.37 | 0.598 | -3.500 |
| 2524 | EED | 8621  | 0.0004819949 | 133.90 | 0.587 | -3.500 |
| 2525 | EEC | 3275  | 0.0001831033 | 129.23 | 0.566 | -1.500 |
| 2526 | EEQ | 6028  | 0.0003370219 | 144.60 | 0.634 | -3.500 |
| 2527 | EEE | 23582 | 0.0013184554 | 142.20 | 0.623 | -3.500 |
| 2528 | EEG | 7616  | 0.0004258060 | 116.43 | 0.510 | -2.467 |
| 2529 | EEH | 2150  | 0.0001202052 | 148.13 | 0.649 | -3.400 |
| 2530 | EEI | 6073  | 0.0003395378 | 149.43 | 0.655 | -0.833 |
| 2531 | EEL | 13718 | 0.0007669652 | 149.47 | 0.655 | -1.067 |
| 2532 | EEK | 9944  | 0.0005559631 | 150.57 | 0.660 | -3.633 |
| 2533 | EEM | 3308  | 0.0001849483 | 150.47 | 0.659 | -1.700 |
| 2534 | EEF | 3714  | 0.0002076475 | 158.77 | 0.696 | -1.400 |
| 2535 | EEP | 5520  | 0.0003086199 | 135.77 | 0.595 | -2.867 |
| 2536 | EES | 7089  | 0.0003963417 | 126.60 | 0.555 | -2.600 |
| 2537 | EET | 5628  | 0.0003146581 | 135.30 | 0.593 | -2.567 |
| 2538 | EEW | 1572  | 0.0000878896 | 170.87 | 0.749 | -2.633 |
| 2539 | EEY | 2611  | 0.0001459794 | 160.47 | 0.703 | -2.767 |
| 2540 | EEV | 7346  | 0.0004107105 | 141.13 | 0.618 | -0.933 |
| 2541 | EGA | 5531  | 0.0003092349 | 99.03  | 0.434 | -0.700 |
| 2542 | EGR | 4728  | 0.0002643396 | 133.70 | 0.586 | -2.800 |

|      |     |      |              |        |       |        |
|------|-----|------|--------------|--------|-------|--------|
| 2543 | EGN | 2514 | 0.0001405562 | 110.60 | 0.485 | -2.467 |
| 2544 | EGD | 4038 | 0.0002257622 | 108.13 | 0.474 | -2.467 |
| 2545 | EGC | 1678 | 0.0000938160 | 103.47 | 0.453 | -0.467 |
| 2546 | EGQ | 3447 | 0.0001927197 | 118.83 | 0.521 | -2.467 |
| 2547 | EGE | 6235 | 0.0003485951 | 116.43 | 0.510 | -2.467 |
| 2548 | EGG | 5442 | 0.0003042590 | 90.67  | 0.397 | -1.433 |
| 2549 | EGH | 1918 | 0.0001072342 | 122.37 | 0.536 | -2.367 |
| 2550 | EGI | 3027 | 0.0001692378 | 123.67 | 0.542 | 0.200  |
| 2551 | EGL | 7219 | 0.0004036100 | 123.70 | 0.542 | -0.033 |
| 2552 | EGK | 4580 | 0.0002560650 | 124.80 | 0.547 | -2.600 |
| 2553 | EGM | 1370 | 0.0000765959 | 124.70 | 0.546 | -0.667 |
| 2554 | EGF | 2477 | 0.0001384876 | 133.00 | 0.583 | -0.367 |
| 2555 | EGP | 4823 | 0.0002696510 | 110.00 | 0.482 | -1.833 |
| 2556 | EGS | 6625 | 0.0003703998 | 100.83 | 0.442 | -1.567 |
| 2557 | EGT | 4291 | 0.0002399072 | 109.53 | 0.480 | -1.533 |
| 2558 | EGW | 1081 | 0.0000604381 | 145.10 | 0.636 | -1.600 |
| 2559 | EGY | 1823 | 0.0001019228 | 134.70 | 0.590 | -1.733 |
| 2560 | EGV | 3996 | 0.0002234140 | 115.37 | 0.506 | 0.100  |
| 2561 | EHA | 1370 | 0.0000765959 | 130.73 | 0.573 | -1.633 |
| 2562 | EHR | 1651 | 0.0000923064 | 165.40 | 0.725 | -3.733 |
| 2563 | EHN | 771  | 0.0000431061 | 142.30 | 0.624 | -3.400 |
| 2564 | EHD | 872  | 0.0000487530 | 139.83 | 0.613 | -3.400 |
| 2565 | EHC | 705  | 0.0000394161 | 135.17 | 0.592 | -1.400 |
| 2566 | EHQ | 1515 | 0.0000847027 | 150.53 | 0.660 | -3.400 |
| 2567 | EHE | 1488 | 0.0000831932 | 148.13 | 0.649 | -3.400 |
| 2568 | EHG | 1750 | 0.0000978414 | 122.37 | 0.536 | -2.367 |
| 2569 | EHH | 854  | 0.0000477466 | 154.07 | 0.675 | -3.300 |
| 2570 | EHI | 1301 | 0.0000727381 | 155.37 | 0.681 | -0.733 |
| 2571 | EHL | 3251 | 0.0001817615 | 155.40 | 0.681 | -0.967 |
| 2572 | EHK | 1318 | 0.0000736886 | 156.50 | 0.686 | -3.533 |
| 2573 | EHM | 632  | 0.0000353347 | 156.40 | 0.685 | -1.600 |
| 2574 | EHF | 1174 | 0.0000656376 | 164.70 | 0.722 | -1.300 |
| 2575 | EHP | 1610 | 0.0000900141 | 141.70 | 0.621 | -2.767 |
| 2576 | EHS | 1982 | 0.0001108124 | 132.53 | 0.581 | -2.500 |
| 2577 | EHT | 1195 | 0.0000668117 | 141.23 | 0.619 | -2.467 |
| 2578 | EHW | 373  | 0.0000208542 | 176.80 | 0.775 | -2.533 |
| 2579 | EHY | 835  | 0.0000466843 | 166.40 | 0.729 | -2.667 |
| 2580 | EHV | 1730 | 0.0000967233 | 147.07 | 0.644 | -0.833 |
| 2581 | EIA | 2908 | 0.0001625845 | 132.03 | 0.579 | 0.933  |
| 2582 | EIR | 3119 | 0.0001743814 | 166.70 | 0.730 | -1.167 |
| 2583 | EIN | 2082 | 0.0001164034 | 143.60 | 0.629 | -0.833 |
| 2584 | EID | 2328 | 0.0001301571 | 141.13 | 0.618 | -0.833 |
| 2585 | EIC | 1198 | 0.0000669795 | 136.47 | 0.598 | 1.167  |
| 2586 | EIQ | 3201 | 0.0001789660 | 151.83 | 0.665 | -0.833 |
| 2587 | EIE | 4245 | 0.0002373354 | 149.43 | 0.655 | -0.833 |
| 2588 | EIG | 2086 | 0.0001166270 | 123.67 | 0.542 | 0.200  |
| 2589 | EIH | 1262 | 0.0000705577 | 155.37 | 0.681 | -0.733 |
| 2590 | EII | 3052 | 0.0001706355 | 156.67 | 0.687 | 1.833  |
| 2591 | EIL | 6046 | 0.0003380282 | 156.70 | 0.687 | 1.600  |
| 2592 | EIK | 3662 | 0.0002047402 | 157.80 | 0.691 | -0.967 |
| 2593 | EIM | 1236 | 0.0000691040 | 157.70 | 0.691 | 0.967  |
| 2594 | EIF | 1868 | 0.0001044388 | 166.00 | 0.727 | 1.267  |

|      |     |       |              |        |       |        |
|------|-----|-------|--------------|--------|-------|--------|
| 2595 | EIP | 2704  | 0.0001511790 | 143.00 | 0.627 | -0.200 |
| 2596 | EIS | 4076  | 0.0002278867 | 133.83 | 0.586 | 0.067  |
| 2597 | EIT | 2991  | 0.0001672250 | 142.53 | 0.625 | 0.100  |
| 2598 | EIW | 581   | 0.0000324834 | 178.10 | 0.780 | 0.033  |
| 2599 | EIY | 1475  | 0.0000824664 | 167.70 | 0.735 | -0.100 |
| 2600 | EIV | 2990  | 0.0001671691 | 148.37 | 0.650 | 1.733  |
| 2601 | ELA | 7420  | 0.0004148477 | 132.07 | 0.579 | 0.700  |
| 2602 | ELR | 7289  | 0.0004075236 | 166.73 | 0.731 | -1.400 |
| 2603 | ELN | 3752  | 0.0002097721 | 143.63 | 0.629 | -1.067 |
| 2604 | ELD | 5108  | 0.0002855852 | 141.17 | 0.619 | -1.067 |
| 2605 | ELC | 2424  | 0.0001355244 | 136.50 | 0.598 | 0.933  |
| 2606 | ELQ | 7437  | 0.0004157982 | 151.87 | 0.665 | -1.067 |
| 2607 | ELE | 10448 | 0.0005841414 | 149.47 | 0.655 | -1.067 |
| 2608 | ELG | 5967  | 0.0003336114 | 123.70 | 0.542 | -0.033 |
| 2609 | ELH | 2690  | 0.0001503963 | 155.40 | 0.681 | -0.967 |
| 2610 | ELI | 4549  | 0.0002543319 | 156.70 | 0.687 | 1.600  |
| 2611 | ELL | 12737 | 0.0007121181 | 156.73 | 0.687 | 1.367  |
| 2612 | ELK | 6843  | 0.0003825880 | 157.83 | 0.692 | -1.200 |
| 2613 | ELM | 2203  | 0.0001231684 | 157.73 | 0.691 | 0.733  |
| 2614 | ELF | 3668  | 0.0002050757 | 166.03 | 0.728 | 1.033  |
| 2615 | ELP | 5768  | 0.0003224854 | 143.03 | 0.627 | -0.433 |
| 2616 | ELS | 8089  | 0.0004522511 | 133.87 | 0.587 | -0.167 |
| 2617 | ELT | 5039  | 0.0002817275 | 142.57 | 0.625 | -0.133 |
| 2618 | ELW | 1232  | 0.0000688804 | 178.13 | 0.781 | -0.200 |
| 2619 | ELY | 2677  | 0.0001496695 | 167.73 | 0.735 | -0.333 |
| 2620 | ELV | 6153  | 0.0003440105 | 148.40 | 0.650 | 1.500  |
| 2621 | EKA | 6210  | 0.0003471974 | 133.17 | 0.584 | -1.867 |
| 2622 | EKR | 5075  | 0.0002837402 | 167.83 | 0.735 | -3.967 |
| 2623 | EKN | 3216  | 0.0001798046 | 144.73 | 0.634 | -3.633 |
| 2624 | EKD | 4330  | 0.0002420877 | 142.27 | 0.623 | -3.633 |
| 2625 | EKC | 1704  | 0.0000952696 | 137.60 | 0.603 | -1.633 |
| 2626 | EKQ | 4418  | 0.0002470077 | 152.97 | 0.670 | -3.633 |
| 2627 | EKE | 9468  | 0.0005293502 | 150.57 | 0.660 | -3.633 |
| 2628 | EKG | 4944  | 0.0002764161 | 124.80 | 0.547 | -2.600 |
| 2629 | EKH | 1978  | 0.0001105888 | 156.50 | 0.686 | -3.533 |
| 2630 | EKI | 4652  | 0.0002600905 | 157.80 | 0.691 | -0.967 |
| 2631 | EKL | 9997  | 0.0005589263 | 157.83 | 0.692 | -1.200 |
| 2632 | EKK | 6782  | 0.0003791775 | 158.93 | 0.696 | -3.767 |
| 2633 | EKM | 2681  | 0.0001498931 | 158.83 | 0.696 | -1.833 |
| 2634 | EKF | 2657  | 0.0001485513 | 167.13 | 0.732 | -1.533 |
| 2635 | EKP | 9046  | 0.0005057564 | 144.13 | 0.632 | -3.000 |
| 2636 | EKS | 5634  | 0.0003149936 | 134.97 | 0.591 | -2.733 |
| 2637 | EKT | 4222  | 0.0002360495 | 143.67 | 0.630 | -2.700 |
| 2638 | EKW | 906   | 0.0000506539 | 179.23 | 0.785 | -2.767 |
| 2639 | EKY | 2329  | 0.0001302130 | 168.83 | 0.740 | -2.900 |
| 2640 | EKV | 5256  | 0.0002938598 | 149.50 | 0.655 | -1.067 |
| 2641 | EMA | 2016  | 0.0001127134 | 133.07 | 0.583 | 0.067  |
| 2642 | EMR | 1346  | 0.0000752541 | 167.73 | 0.735 | -2.033 |
| 2643 | EMN | 1022  | 0.0000571394 | 144.63 | 0.634 | -1.700 |
| 2644 | EMD | 1426  | 0.0000797268 | 142.17 | 0.623 | -1.700 |
| 2645 | EMC | 504   | 0.0000281783 | 137.50 | 0.603 | 0.300  |
| 2646 | EMQ | 1365  | 0.0000763163 | 152.87 | 0.670 | -1.700 |

|      |     |      |              |        |       |        |
|------|-----|------|--------------|--------|-------|--------|
| 2647 | EME | 2936 | 0.0001641500 | 150.47 | 0.659 | -1.700 |
| 2648 | EMG | 1280 | 0.0000715640 | 124.70 | 0.546 | -0.667 |
| 2649 | EMH | 477  | 0.0000266688 | 156.40 | 0.685 | -1.600 |
| 2650 | EMI | 1285 | 0.0000718436 | 157.70 | 0.691 | 0.967  |
| 2651 | EML | 2911 | 0.0001627523 | 157.73 | 0.691 | 0.733  |
| 2652 | EMK | 2139 | 0.0001195902 | 158.83 | 0.696 | -1.833 |
| 2653 | EMM | 759  | 0.0000424352 | 158.73 | 0.696 | 0.100  |
| 2654 | EMF | 914  | 0.0000511012 | 167.03 | 0.732 | 0.400  |
| 2655 | EMP | 1204 | 0.0000673149 | 144.03 | 0.631 | -1.067 |
| 2656 | EMS | 1578 | 0.0000882250 | 134.87 | 0.591 | -0.800 |
| 2657 | EMT | 1340 | 0.0000749186 | 143.57 | 0.629 | -0.767 |
| 2658 | EMW | 295  | 0.0000164933 | 179.13 | 0.785 | -0.833 |
| 2659 | EMY | 666  | 0.0000372357 | 168.73 | 0.739 | -0.967 |
| 2660 | EMV | 1782 | 0.0000996306 | 149.40 | 0.655 | 0.867  |
| 2661 | EFA | 1789 | 0.0001000219 | 141.37 | 0.619 | 0.367  |
| 2662 | EFR | 1899 | 0.0001061720 | 176.03 | 0.771 | -1.733 |
| 2663 | EFN | 1152 | 0.0000644076 | 152.93 | 0.670 | -1.400 |
| 2664 | EFD | 1638 | 0.0000915796 | 150.47 | 0.659 | -1.400 |
| 2665 | EFC | 859  | 0.0000480262 | 145.80 | 0.639 | 0.600  |
| 2666 | EFQ | 1834 | 0.0001025378 | 161.17 | 0.706 | -1.400 |
| 2667 | EFE | 2232 | 0.0001247898 | 158.77 | 0.696 | -1.400 |
| 2668 | EFG | 1714 | 0.0000958287 | 133.00 | 0.583 | -0.367 |
| 2669 | EFH | 896  | 0.0000500948 | 164.70 | 0.722 | -1.300 |
| 2670 | EFI | 1833 | 0.0001024819 | 166.00 | 0.727 | 1.267  |
| 2671 | EFL | 4134 | 0.0002311295 | 166.03 | 0.728 | 1.033  |
| 2672 | EFK | 1914 | 0.0001070106 | 167.13 | 0.732 | -1.533 |
| 2673 | EFM | 763  | 0.0000426589 | 167.03 | 0.732 | 0.400  |
| 2674 | EFF | 1508 | 0.0000843114 | 175.33 | 0.768 | 0.700  |
| 2675 | EFP | 1665 | 0.0000930891 | 152.33 | 0.668 | -0.767 |
| 2676 | EFS | 2852 | 0.0001594536 | 143.17 | 0.627 | -0.500 |
| 2677 | EFT | 1736 | 0.0000970587 | 151.87 | 0.665 | -0.467 |
| 2678 | EFW | 523  | 0.0000292406 | 187.43 | 0.821 | -0.533 |
| 2679 | EFY | 1148 | 0.0000641840 | 177.03 | 0.776 | -0.667 |
| 2680 | EFV | 2302 | 0.0001287034 | 157.70 | 0.691 | 1.167  |
| 2681 | EPA | 4533 | 0.0002534373 | 118.37 | 0.519 | -1.100 |
| 2682 | EPR | 3401 | 0.0001901479 | 153.03 | 0.671 | -3.200 |
| 2683 | EPN | 1350 | 0.0000754777 | 129.93 | 0.569 | -2.867 |
| 2684 | EPD | 2374 | 0.0001327289 | 127.47 | 0.559 | -2.867 |
| 2685 | EPC | 1231 | 0.0000688245 | 122.80 | 0.538 | -0.867 |
| 2686 | EPQ | 2926 | 0.0001635909 | 138.17 | 0.605 | -2.867 |
| 2687 | EPE | 5220 | 0.0002918471 | 135.77 | 0.595 | -2.867 |
| 2688 | EPG | 5773 | 0.0003227650 | 110.00 | 0.482 | -1.833 |
| 2689 | EPH | 1243 | 0.0000694954 | 141.70 | 0.621 | -2.767 |
| 2690 | EPI | 1947 | 0.0001088556 | 143.00 | 0.627 | -0.200 |
| 2691 | EPL | 5526 | 0.0003089554 | 143.03 | 0.627 | -0.433 |
| 2692 | EPK | 2587 | 0.0001446376 | 144.13 | 0.632 | -3.000 |
| 2693 | EPM | 875  | 0.0000489207 | 144.03 | 0.631 | -1.067 |
| 2694 | EPF | 1387 | 0.0000775463 | 152.33 | 0.668 | -0.767 |
| 2695 | EPP | 5624 | 0.0003144345 | 129.33 | 0.567 | -2.233 |
| 2696 | EPS | 5036 | 0.0002815597 | 120.17 | 0.527 | -1.967 |
| 2697 | EPT | 2818 | 0.0001575527 | 128.87 | 0.565 | -1.933 |
| 2698 | EPW | 926  | 0.0000517721 | 164.43 | 0.721 | -2.000 |

|      |     |      |              |        |       |        |
|------|-----|------|--------------|--------|-------|--------|
| 2699 | EPY | 983  | 0.0000549589 | 154.03 | 0.675 | -2.133 |
| 2700 | EPV | 3968 | 0.0002218485 | 134.70 | 0.590 | -0.300 |
| 2701 | ESA | 4369 | 0.0002442682 | 109.20 | 0.479 | -0.833 |
| 2702 | ESR | 4223 | 0.0002361054 | 143.87 | 0.630 | -2.933 |
| 2703 | ESN | 2122 | 0.0001186397 | 120.77 | 0.529 | -2.600 |
| 2704 | ESD | 3569 | 0.0001995406 | 118.30 | 0.518 | -2.600 |
| 2705 | ESC | 1828 | 0.0001022024 | 113.63 | 0.498 | -0.600 |
| 2706 | ESQ | 3684 | 0.0002059702 | 129.00 | 0.565 | -2.600 |
| 2707 | ESE | 6189 | 0.0003460233 | 126.60 | 0.555 | -2.600 |
| 2708 | ESG | 4995 | 0.0002792675 | 100.83 | 0.442 | -1.567 |
| 2709 | ESH | 1697 | 0.0000948783 | 132.53 | 0.581 | -2.500 |
| 2710 | ESI | 3184 | 0.0001780155 | 133.83 | 0.586 | 0.067  |
| 2711 | ESL | 8150 | 0.0004556616 | 133.87 | 0.587 | -0.167 |
| 2712 | ESK | 3948 | 0.0002207303 | 134.97 | 0.591 | -2.733 |
| 2713 | ESM | 1374 | 0.0000768195 | 134.87 | 0.591 | -0.800 |
| 2714 | ESF | 2760 | 0.0001543099 | 143.17 | 0.627 | -0.500 |
| 2715 | ESP | 4759 | 0.0002660728 | 120.17 | 0.527 | -1.967 |
| 2716 | ESS | 7706 | 0.0004308378 | 111.00 | 0.486 | -1.700 |
| 2717 | EST | 4065 | 0.0002272717 | 119.70 | 0.525 | -1.667 |
| 2718 | ESW | 1062 | 0.0000593758 | 155.27 | 0.680 | -1.733 |
| 2719 | ESY | 1760 | 0.0000984005 | 144.87 | 0.635 | -1.867 |
| 2720 | ESV | 4562 | 0.0002550587 | 125.53 | 0.550 | -0.033 |
| 2721 | ETA | 3706 | 0.0002072002 | 117.90 | 0.517 | -0.800 |
| 2722 | ETR | 3004 | 0.0001679518 | 152.57 | 0.669 | -2.900 |
| 2723 | ETN | 1717 | 0.0000959964 | 129.47 | 0.567 | -2.567 |
| 2724 | ETD | 2540 | 0.0001420099 | 127.00 | 0.557 | -2.567 |
| 2725 | ETC | 1245 | 0.0000696072 | 122.33 | 0.536 | -0.567 |
| 2726 | ETQ | 2996 | 0.0001675046 | 137.70 | 0.603 | -2.567 |
| 2727 | ETE | 4748 | 0.0002654578 | 135.30 | 0.593 | -2.567 |
| 2728 | ETG | 3535 | 0.0001976397 | 109.53 | 0.480 | -1.533 |
| 2729 | ETH | 1374 | 0.0000768195 | 141.23 | 0.619 | -2.467 |
| 2730 | ETI | 2700 | 0.0001509554 | 142.53 | 0.625 | 0.100  |
| 2731 | ETL | 6577 | 0.0003677161 | 142.57 | 0.625 | -0.133 |
| 2732 | ETK | 3396 | 0.0001898683 | 143.67 | 0.630 | -2.700 |
| 2733 | ETM | 1129 | 0.0000631217 | 143.57 | 0.629 | -0.767 |
| 2734 | ETF | 2332 | 0.0001303807 | 151.87 | 0.665 | -0.467 |
| 2735 | ETP | 3688 | 0.0002061939 | 128.87 | 0.565 | -1.933 |
| 2736 | ETS | 4853 | 0.0002713283 | 119.70 | 0.525 | -1.667 |
| 2737 | ETT | 4153 | 0.0002321917 | 128.40 | 0.563 | -1.633 |
| 2738 | ETW | 805  | 0.0000450071 | 163.97 | 0.719 | -1.700 |
| 2739 | ETY | 1508 | 0.0000843114 | 153.57 | 0.673 | -1.833 |
| 2740 | ETV | 4007 | 0.0002240290 | 134.23 | 0.588 | 0.000  |
| 2741 | EWA | 763  | 0.0000426589 | 153.47 | 0.673 | -0.867 |
| 2742 | EWR | 742  | 0.0000414848 | 188.13 | 0.824 | -2.967 |
| 2743 | EWN | 560  | 0.0000313093 | 165.03 | 0.723 | -2.633 |
| 2744 | EWD | 603  | 0.0000337134 | 162.57 | 0.712 | -2.633 |
| 2745 | EWC | 198  | 0.0000110701 | 157.90 | 0.692 | -0.633 |
| 2746 | EWQ | 677  | 0.0000378507 | 173.27 | 0.759 | -2.633 |
| 2747 | EWE | 1058 | 0.0000591521 | 170.87 | 0.749 | -2.633 |
| 2748 | EWG | 696  | 0.0000389129 | 145.10 | 0.636 | -1.600 |
| 2749 | EWH | 294  | 0.0000164374 | 176.80 | 0.775 | -2.533 |
| 2750 | EWI | 656  | 0.0000366766 | 178.10 | 0.780 | 0.033  |

|      |     |      |              |        |       |        |
|------|-----|------|--------------|--------|-------|--------|
| 2751 | EWL | 1361 | 0.0000760927 | 178.13 | 0.781 | -0.200 |
| 2752 | EWK | 972  | 0.0000543439 | 179.23 | 0.785 | -2.767 |
| 2753 | EWM | 284  | 0.0000158783 | 179.13 | 0.785 | -0.833 |
| 2754 | EWF | 456  | 0.0000254947 | 187.43 | 0.821 | -0.533 |
| 2755 | EWP | 418  | 0.0000233701 | 164.43 | 0.721 | -2.000 |
| 2756 | EWS | 813  | 0.0000454543 | 155.27 | 0.680 | -1.733 |
| 2757 | EWT | 721  | 0.0000403107 | 163.97 | 0.719 | -1.700 |
| 2758 | EWV | 212  | 0.0000118528 | 199.53 | 0.874 | -1.767 |
| 2759 | EWY | 366  | 0.0000204628 | 189.13 | 0.829 | -1.900 |
| 2760 | EWV | 702  | 0.0000392484 | 169.80 | 0.744 | -0.067 |
| 2761 | EYA | 1422 | 0.0000795032 | 143.07 | 0.627 | -1.000 |
| 2762 | EYR | 1415 | 0.0000791118 | 177.73 | 0.779 | -3.100 |
| 2763 | EYN | 951  | 0.0000531698 | 154.63 | 0.678 | -2.767 |
| 2764 | EYD | 1204 | 0.0000673149 | 152.17 | 0.667 | -2.767 |
| 2765 | EYC | 679  | 0.0000379625 | 147.50 | 0.646 | -0.767 |
| 2766 | EYQ | 1403 | 0.0000784409 | 162.87 | 0.714 | -2.767 |
| 2767 | EYE | 2148 | 0.0001200934 | 160.47 | 0.703 | -2.767 |
| 2768 | EYG | 1372 | 0.0000767077 | 134.70 | 0.590 | -1.733 |
| 2769 | EYH | 635  | 0.0000355025 | 166.40 | 0.729 | -2.667 |
| 2770 | EYI | 1539 | 0.0000860446 | 167.70 | 0.735 | -0.100 |
| 2771 | EYL | 3212 | 0.0001795810 | 167.73 | 0.735 | -0.333 |
| 2772 | EYK | 1654 | 0.0000924741 | 168.83 | 0.740 | -2.900 |
| 2773 | EYM | 669  | 0.0000374034 | 168.73 | 0.739 | -0.967 |
| 2774 | EYF | 1386 | 0.0000774904 | 177.03 | 0.776 | -0.667 |
| 2775 | EYP | 987  | 0.0000551826 | 154.03 | 0.675 | -2.133 |
| 2776 | EYS | 1909 | 0.0001067310 | 144.87 | 0.635 | -1.867 |
| 2777 | EYT | 1345 | 0.0000751981 | 153.57 | 0.673 | -1.833 |
| 2778 | EYW | 367  | 0.0000205187 | 189.13 | 0.829 | -1.900 |
| 2779 | EYY | 872  | 0.0000487530 | 178.73 | 0.783 | -2.033 |
| 2780 | EYV | 1708 | 0.0000954933 | 159.40 | 0.699 | -0.200 |
| 2781 | EVA | 5102 | 0.0002852498 | 123.73 | 0.542 | 0.833  |
| 2782 | EVR | 3611 | 0.0002018888 | 158.40 | 0.694 | -1.267 |
| 2783 | EVN | 2460 | 0.0001375371 | 135.30 | 0.593 | -0.933 |
| 2784 | EVD | 3660 | 0.0002046284 | 132.83 | 0.582 | -0.933 |
| 2785 | EVC | 1441 | 0.0000805654 | 128.17 | 0.562 | 1.067  |
| 2786 | EVQ | 3617 | 0.0002022243 | 143.53 | 0.629 | -0.933 |
| 2787 | EVE | 6181 | 0.0003455760 | 141.13 | 0.618 | -0.933 |
| 2788 | EVG | 3572 | 0.0001997084 | 115.37 | 0.506 | 0.100  |
| 2789 | EVH | 1565 | 0.0000874982 | 147.07 | 0.644 | -0.833 |
| 2790 | EVI | 3731 | 0.0002085980 | 148.37 | 0.650 | 1.733  |
| 2791 | EVL | 7867 | 0.0004398393 | 148.40 | 0.650 | 1.500  |
| 2792 | EVK | 4549 | 0.0002543319 | 149.50 | 0.655 | -1.067 |
| 2793 | EVM | 1638 | 0.0000915796 | 149.40 | 0.655 | 0.867  |
| 2794 | EVF | 2784 | 0.0001556518 | 157.70 | 0.691 | 1.167  |
| 2795 | EVP | 3984 | 0.0002227431 | 134.70 | 0.590 | -0.300 |
| 2796 | EVS | 5081 | 0.0002840756 | 125.53 | 0.550 | -0.033 |
| 2797 | EVT | 4669 | 0.0002610410 | 134.23 | 0.588 | 0.000  |
| 2798 | EVW | 892  | 0.0000498712 | 169.80 | 0.744 | -0.067 |
| 2799 | EVY | 1754 | 0.0000980651 | 159.40 | 0.699 | -0.200 |
| 2800 | EVV | 5261 | 0.0002941393 | 140.07 | 0.614 | 1.633  |
| 2801 | GAA | 9783 | 0.0005469617 | 81.63  | 0.358 | 1.067  |
| 2802 | GAR | 5669 | 0.0003169504 | 116.30 | 0.510 | -1.033 |

|      |     |       |              |        |       |        |
|------|-----|-------|--------------|--------|-------|--------|
| 2803 | GAN | 2137  | 0.0001194784 | 93.20  | 0.408 | -0.700 |
| 2804 | GAD | 3598  | 0.0002011620 | 90.73  | 0.398 | -0.700 |
| 2805 | GAC | 1841  | 0.0001029292 | 86.07  | 0.377 | 1.300  |
| 2806 | GAQ | 3863  | 0.0002159780 | 101.43 | 0.444 | -0.700 |
| 2807 | GAE | 5260  | 0.0002940834 | 99.03  | 0.434 | -0.700 |
| 2808 | GAG | 10142 | 0.0005670331 | 73.27  | 0.321 | 0.333  |
| 2809 | GAH | 1942  | 0.0001085761 | 104.97 | 0.460 | -0.600 |
| 2810 | GAI | 2899  | 0.0001620814 | 106.27 | 0.466 | 1.967  |
| 2811 | GAL | 8198  | 0.0004583453 | 106.30 | 0.466 | 1.733  |
| 2812 | GAK | 3259  | 0.0001822087 | 107.40 | 0.471 | -0.833 |
| 2813 | GAM | 1412  | 0.0000789441 | 107.30 | 0.470 | 1.100  |
| 2814 | GAF | 2768  | 0.0001547572 | 115.60 | 0.507 | 1.400  |
| 2815 | GAP | 7391  | 0.0004132264 | 92.60  | 0.406 | -0.067 |
| 2816 | GAS | 7113  | 0.0003976836 | 83.43  | 0.366 | 0.200  |
| 2817 | GAT | 4417  | 0.0002469518 | 92.13  | 0.404 | 0.233  |
| 2818 | GAW | 1193  | 0.0000666999 | 127.70 | 0.560 | 0.167  |
| 2819 | GAY | 1505  | 0.0000841436 | 117.30 | 0.514 | 0.033  |
| 2820 | GAV | 5765  | 0.0003223177 | 97.97  | 0.429 | 1.867  |
| 2821 | GRA | 5602  | 0.0003132045 | 116.30 | 0.510 | -1.033 |
| 2822 | GRR | 6685  | 0.0003737543 | 150.97 | 0.662 | -3.133 |
| 2823 | GRN | 1993  | 0.0001114274 | 127.87 | 0.560 | -2.800 |
| 2824 | GRD | 3148  | 0.0001760028 | 125.40 | 0.550 | -2.800 |
| 2825 | GRC | 1874  | 0.0001047742 | 120.73 | 0.529 | -0.800 |
| 2826 | GRQ | 2914  | 0.0001629200 | 136.10 | 0.596 | -2.800 |
| 2827 | GRE | 3938  | 0.0002201712 | 133.70 | 0.586 | -2.800 |
| 2828 | GRG | 7938  | 0.0004438088 | 107.93 | 0.473 | -1.767 |
| 2829 | GRH | 1882  | 0.0001052215 | 139.63 | 0.612 | -2.700 |
| 2830 | GRI | 2759  | 0.0001542540 | 140.93 | 0.618 | -0.133 |
| 2831 | GRL | 6528  | 0.0003649766 | 140.97 | 0.618 | -0.367 |
| 2832 | GRK | 3834  | 0.0002143566 | 142.07 | 0.623 | -2.933 |
| 2833 | GRM | 1167  | 0.0000652463 | 141.97 | 0.622 | -1.000 |
| 2834 | GRF | 2090  | 0.0001168506 | 150.27 | 0.658 | -0.700 |
| 2835 | GRP | 5517  | 0.0003084521 | 127.27 | 0.558 | -2.167 |
| 2836 | GRS | 5522  | 0.0003087317 | 118.10 | 0.518 | -1.900 |
| 2837 | GRT | 3692  | 0.0002064175 | 126.80 | 0.556 | -1.867 |
| 2838 | GRW | 1254  | 0.0000701104 | 162.37 | 0.712 | -1.933 |
| 2839 | GRY | 1801  | 0.0001006928 | 151.97 | 0.666 | -2.067 |
| 2840 | GRV | 4603  | 0.0002573510 | 132.63 | 0.581 | -0.233 |
| 2841 | GNA | 2454  | 0.0001372017 | 93.20  | 0.408 | -0.700 |
| 2842 | GNR | 2137  | 0.0001194784 | 127.87 | 0.560 | -2.800 |
| 2843 | GNN | 1454  | 0.0000812923 | 104.77 | 0.459 | -2.467 |
| 2844 | GND | 1457  | 0.0000814600 | 102.30 | 0.448 | -2.467 |
| 2845 | GNC | 1027  | 0.0000574190 | 97.63  | 0.428 | -0.467 |
| 2846 | GNQ | 1676  | 0.0000937042 | 113.00 | 0.495 | -2.467 |
| 2847 | GNE | 2221  | 0.0001241748 | 110.60 | 0.485 | -2.467 |
| 2848 | GNG | 2720  | 0.0001520736 | 84.83  | 0.372 | -1.433 |
| 2849 | GNH | 1028  | 0.0000574749 | 116.53 | 0.511 | -2.367 |
| 2850 | GNI | 2461  | 0.0001375930 | 117.83 | 0.516 | 0.200  |
| 2851 | GNL | 4550  | 0.0002543878 | 117.87 | 0.517 | -0.033 |
| 2852 | GNK | 2359  | 0.0001318903 | 118.97 | 0.521 | -2.600 |
| 2853 | GNM | 875   | 0.0000489207 | 118.87 | 0.521 | -0.667 |
| 2854 | GNF | 1716  | 0.0000959405 | 127.17 | 0.557 | -0.367 |

|      |     |      |              |        |       |        |
|------|-----|------|--------------|--------|-------|--------|
| 2855 | GNP | 2850 | 0.0001593418 | 104.17 | 0.456 | -1.833 |
| 2856 | GNS | 3654 | 0.0002042929 | 95.00  | 0.416 | -1.567 |
| 2857 | GNT | 2346 | 0.0001311635 | 103.70 | 0.454 | -1.533 |
| 2858 | GNW | 563  | 0.0000314770 | 139.27 | 0.610 | -1.600 |
| 2859 | GNY | 1536 | 0.0000858768 | 128.87 | 0.565 | -1.733 |
| 2860 | GNV | 2591 | 0.0001448613 | 109.53 | 0.480 | 0.100  |
| 2861 | GDA | 3659 | 0.0002045725 | 90.73  | 0.398 | -0.700 |
| 2862 | GDR | 3530 | 0.0001973602 | 125.40 | 0.550 | -2.800 |
| 2863 | GDN | 1627 | 0.0000909646 | 102.30 | 0.448 | -2.467 |
| 2864 | GDD | 2615 | 0.0001462031 | 99.83  | 0.437 | -2.467 |
| 2865 | GDC | 1189 | 0.0000664763 | 95.17  | 0.417 | -0.467 |
| 2866 | GDQ | 2050 | 0.0001146143 | 110.53 | 0.484 | -2.467 |
| 2867 | GDE | 3219 | 0.0001799724 | 108.13 | 0.474 | -2.467 |
| 2868 | GDG | 4530 | 0.0002532696 | 82.37  | 0.361 | -1.433 |
| 2869 | GDH | 1340 | 0.0000749186 | 114.07 | 0.500 | -2.367 |
| 2870 | GDI | 2837 | 0.0001586150 | 115.37 | 0.506 | 0.200  |
| 2871 | GDL | 5457 | 0.0003050976 | 115.40 | 0.506 | -0.033 |
| 2872 | GDK | 2933 | 0.0001639823 | 116.50 | 0.511 | -2.600 |
| 2873 | GDM | 1122 | 0.0000627303 | 116.40 | 0.510 | -0.667 |
| 2874 | GDF | 2419 | 0.0001352448 | 124.70 | 0.546 | -0.367 |
| 2875 | GDP | 4029 | 0.0002252590 | 101.70 | 0.446 | -1.833 |
| 2876 | GDS | 4928 | 0.0002755215 | 92.53  | 0.405 | -1.567 |
| 2877 | GDT | 2986 | 0.0001669455 | 101.23 | 0.444 | -1.533 |
| 2878 | GDW | 810  | 0.0000452866 | 136.80 | 0.599 | -1.600 |
| 2879 | GDY | 1566 | 0.0000875541 | 126.40 | 0.554 | -1.733 |
| 2880 | GDV | 3683 | 0.0002059143 | 107.07 | 0.469 | 0.100  |
| 2881 | GCA | 1584 | 0.0000885605 | 86.07  | 0.377 | 1.300  |
| 2882 | GCR | 1629 | 0.0000910764 | 120.73 | 0.529 | -0.800 |
| 2883 | GCN | 660  | 0.0000369002 | 97.63  | 0.428 | -0.467 |
| 2884 | GCD | 964  | 0.0000538967 | 95.17  | 0.417 | -0.467 |
| 2885 | GCC | 1028 | 0.0000574749 | 90.50  | 0.397 | 1.533  |
| 2886 | GCQ | 1104 | 0.0000617240 | 105.87 | 0.464 | -0.467 |
| 2887 | GCE | 1270 | 0.0000710049 | 103.47 | 0.453 | -0.467 |
| 2888 | GCG | 2709 | 0.0001514586 | 77.70  | 0.340 | 0.567  |
| 2889 | GCH | 737  | 0.0000412052 | 109.40 | 0.479 | -0.367 |
| 2890 | GCI | 1038 | 0.0000580340 | 110.70 | 0.485 | 2.200  |
| 2891 | GCL | 2355 | 0.0001316666 | 110.73 | 0.485 | 1.967  |
| 2892 | GCK | 993  | 0.0000555180 | 111.83 | 0.490 | -0.600 |
| 2893 | GCM | 401  | 0.0000224197 | 111.73 | 0.490 | 1.333  |
| 2894 | GCF | 949  | 0.0000530580 | 120.03 | 0.526 | 1.633  |
| 2895 | GCP | 1660 | 0.0000928096 | 97.03  | 0.425 | 0.167  |
| 2896 | GCS | 2306 | 0.0001289271 | 87.87  | 0.385 | 0.433  |
| 2897 | GCT | 1341 | 0.0000749745 | 96.57  | 0.423 | 0.467  |
| 2898 | GCW | 465  | 0.0000259979 | 132.13 | 0.579 | 0.400  |
| 2899 | GCY | 641  | 0.0000358379 | 121.73 | 0.533 | 0.267  |
| 2900 | GCV | 1559 | 0.0000871628 | 102.40 | 0.449 | 2.100  |
| 2901 | GQA | 4024 | 0.0002249794 | 101.43 | 0.444 | -0.700 |
| 2902 | GQR | 3324 | 0.0001858428 | 136.10 | 0.596 | -2.800 |
| 2903 | GQN | 1573 | 0.0000879455 | 113.00 | 0.495 | -2.467 |
| 2904 | GQD | 2322 | 0.0001298216 | 110.53 | 0.484 | -2.467 |
| 2905 | GQC | 1275 | 0.0000712845 | 105.87 | 0.464 | -0.467 |
| 2906 | GQQ | 2679 | 0.0001497813 | 121.23 | 0.531 | -2.467 |



|      |     |       |              |        |       |        |
|------|-----|-------|--------------|--------|-------|--------|
| 2907 | GQE | 3653  | 0.0002042370 | 118.83 | 0.521 | -2.467 |
| 2908 | GQG | 3887  | 0.0002173198 | 93.07  | 0.408 | -1.433 |
| 2909 | GQH | 1408  | 0.0000787204 | 124.77 | 0.547 | -2.367 |
| 2910 | GQI | 1983  | 0.0001108683 | 126.07 | 0.552 | 0.200  |
| 2911 | GQL | 4735  | 0.0002647310 | 126.10 | 0.553 | -0.033 |
| 2912 | GQK | 2928  | 0.0001637027 | 127.20 | 0.557 | -2.600 |
| 2913 | GQM | 1022  | 0.0000571394 | 127.10 | 0.557 | -0.667 |
| 2914 | GQF | 1506  | 0.0000841996 | 135.40 | 0.593 | -0.367 |
| 2915 | GQP | 4165  | 0.0002328627 | 112.40 | 0.493 | -1.833 |
| 2916 | GQS | 3688  | 0.0002061939 | 103.23 | 0.452 | -1.567 |
| 2917 | GQT | 2634  | 0.0001472654 | 111.93 | 0.491 | -1.533 |
| 2918 | GQW | 828   | 0.0000462930 | 147.50 | 0.646 | -1.600 |
| 2919 | GQY | 1261  | 0.0000705018 | 137.10 | 0.601 | -1.733 |
| 2920 | GQV | 3458  | 0.0001933347 | 117.77 | 0.516 | 0.100  |
| 2921 | GEA | 5747  | 0.0003213113 | 99.03  | 0.434 | -0.700 |
| 2922 | GER | 5406  | 0.0003022462 | 133.70 | 0.586 | -2.800 |
| 2923 | GEN | 2764  | 0.0001545336 | 110.60 | 0.485 | -2.467 |
| 2924 | GED | 4246  | 0.0002373913 | 108.13 | 0.474 | -2.467 |
| 2925 | GEC | 1461  | 0.0000816836 | 103.47 | 0.453 | -0.467 |
| 2926 | GEQ | 2768  | 0.0001547572 | 118.83 | 0.521 | -2.467 |
| 2927 | GEE | 7022  | 0.0003925958 | 116.43 | 0.510 | -2.467 |
| 2928 | GEG | 5903  | 0.0003300332 | 90.67  | 0.397 | -1.433 |
| 2929 | GEH | 1406  | 0.0000786086 | 122.37 | 0.536 | -2.367 |
| 2930 | GEI | 3030  | 0.0001694055 | 123.67 | 0.542 | 0.200  |
| 2931 | GEL | 6106  | 0.0003413828 | 123.70 | 0.542 | -0.033 |
| 2932 | GEK | 10113 | 0.0005654118 | 124.80 | 0.547 | -2.600 |
| 2933 | GEM | 1348  | 0.0000753659 | 124.70 | 0.546 | -0.667 |
| 2934 | GEF | 1877  | 0.0001049419 | 133.00 | 0.583 | -0.367 |
| 2935 | GEP | 4798  | 0.0002682533 | 110.00 | 0.482 | -1.833 |
| 2936 | GES | 4460  | 0.0002493559 | 100.83 | 0.442 | -1.567 |
| 2937 | GET | 3664  | 0.0002048520 | 109.53 | 0.480 | -1.533 |
| 2938 | GEW | 928   | 0.0000518839 | 145.10 | 0.636 | -1.600 |
| 2939 | GEY | 1545  | 0.0000863800 | 134.70 | 0.590 | -1.733 |
| 2940 | GEV | 4765  | 0.0002664083 | 115.37 | 0.506 | 0.100  |
| 2941 | GGA | 8150  | 0.0004556616 | 73.27  | 0.321 | 0.333  |
| 2942 | GGR | 6808  | 0.0003806312 | 107.93 | 0.473 | -1.767 |
| 2943 | GGN | 2730  | 0.0001526327 | 84.83  | 0.372 | -1.433 |
| 2944 | GGD | 4055  | 0.0002267126 | 82.37  | 0.361 | -1.433 |
| 2945 | GGC | 2317  | 0.0001295421 | 77.70  | 0.340 | 0.567  |
| 2946 | GGQ | 3811  | 0.0002130707 | 93.07  | 0.408 | -1.433 |
| 2947 | GGE | 4944  | 0.0002764161 | 90.67  | 0.397 | -1.433 |
| 2948 | GGG | 14827 | 0.0008289687 | 64.90  | 0.284 | -0.400 |
| 2949 | GGH | 2402  | 0.0001342944 | 96.60  | 0.423 | -1.333 |
| 2950 | GGI | 3051  | 0.0001705796 | 97.90  | 0.429 | 1.233  |
| 2951 | GGL | 7678  | 0.0004292724 | 97.93  | 0.429 | 1.000  |
| 2952 | GGK | 4204  | 0.0002350431 | 99.03  | 0.434 | -1.567 |
| 2953 | GGM | 1311  | 0.0000732972 | 98.93  | 0.434 | 0.367  |
| 2954 | GGF | 2988  | 0.0001670573 | 107.23 | 0.470 | 0.667  |
| 2955 | GGP | 6919  | 0.0003868371 | 84.23  | 0.369 | -0.800 |
| 2956 | GGS | 9577  | 0.0005354443 | 75.07  | 0.329 | -0.533 |
| 2957 | GGT | 4506  | 0.0002519278 | 83.77  | 0.367 | -0.500 |
| 2958 | GGW | 1311  | 0.0000732972 | 119.33 | 0.523 | -0.567 |

|      |     |      |              |        |       |        |
|------|-----|------|--------------|--------|-------|--------|
| 2959 | GGY | 2248 | 0.0001256843 | 108.93 | 0.477 | -0.700 |
| 2960 | GGV | 4998 | 0.0002794352 | 89.60  | 0.393 | 1.133  |
| 2961 | GHA | 1750 | 0.0000978414 | 104.97 | 0.460 | -0.600 |
| 2962 | GHR | 2225 | 0.0001243984 | 139.63 | 0.612 | -2.700 |
| 2963 | GHN | 862  | 0.0000481939 | 116.53 | 0.511 | -2.367 |
| 2964 | GHD | 1020 | 0.0000570276 | 114.07 | 0.500 | -2.367 |
| 2965 | GHC | 984  | 0.0000550149 | 109.40 | 0.479 | -0.367 |
| 2966 | GHQ | 1377 | 0.0000769872 | 124.77 | 0.547 | -2.367 |
| 2967 | GHE | 1479 | 0.0000826900 | 122.37 | 0.536 | -2.367 |
| 2968 | GHG | 2265 | 0.0001266348 | 96.60  | 0.423 | -1.333 |
| 2969 | GHH | 1045 | 0.0000584253 | 128.30 | 0.562 | -2.267 |
| 2970 | GHI | 1367 | 0.0000764282 | 129.60 | 0.568 | 0.300  |
| 2971 | GHL | 3545 | 0.0001981988 | 129.63 | 0.568 | 0.067  |
| 2972 | GHK | 1268 | 0.0000708931 | 130.73 | 0.573 | -2.500 |
| 2973 | GHM | 624  | 0.0000348875 | 130.63 | 0.572 | -0.567 |
| 2974 | GHF | 1208 | 0.0000675386 | 138.93 | 0.609 | -0.267 |
| 2975 | GHP | 2379 | 0.0001330085 | 115.93 | 0.508 | -1.733 |
| 2976 | GHS | 3165 | 0.0001769533 | 106.77 | 0.468 | -1.467 |
| 2977 | GHT | 1871 | 0.0001046065 | 115.47 | 0.506 | -1.433 |
| 2978 | GHW | 529  | 0.0000295761 | 151.03 | 0.662 | -1.500 |
| 2979 | GHY | 991  | 0.0000554062 | 140.63 | 0.616 | -1.633 |
| 2980 | GHV | 2125 | 0.0001188075 | 121.30 | 0.532 | 0.200  |
| 2981 | GIA | 2983 | 0.0001667777 | 106.27 | 0.466 | 1.967  |
| 2982 | GIR | 2561 | 0.0001431840 | 140.93 | 0.618 | -0.133 |
| 2983 | GIN | 1674 | 0.0000935923 | 117.83 | 0.516 | 0.200  |
| 2984 | GID | 1901 | 0.0001062838 | 115.37 | 0.506 | 0.200  |
| 2985 | GIC | 1259 | 0.0000703899 | 110.70 | 0.485 | 2.200  |
| 2986 | GIQ | 2261 | 0.0001264111 | 126.07 | 0.552 | 0.200  |
| 2987 | GIE | 1952 | 0.0001091352 | 123.67 | 0.542 | 0.200  |
| 2988 | GIG | 2848 | 0.0001592300 | 97.90  | 0.429 | 1.233  |
| 2989 | GIH | 1254 | 0.0000701104 | 129.60 | 0.568 | 0.300  |
| 2990 | GII | 2720 | 0.0001520736 | 130.90 | 0.574 | 2.867  |
| 2991 | GIL | 5242 | 0.0002930771 | 130.93 | 0.574 | 2.633  |
| 2992 | GIK | 2315 | 0.0001294303 | 132.03 | 0.579 | 0.067  |
| 2993 | GIM | 934  | 0.0000522194 | 131.93 | 0.578 | 2.000  |
| 2994 | GIF | 2263 | 0.0001265230 | 140.23 | 0.615 | 2.300  |
| 2995 | GIP | 4140 | 0.0002314649 | 117.23 | 0.514 | 0.833  |
| 2996 | GIS | 4100 | 0.0002292285 | 108.07 | 0.474 | 1.100  |
| 2997 | GIT | 2671 | 0.0001493340 | 116.77 | 0.512 | 1.133  |
| 2998 | GIW | 650  | 0.0000363411 | 152.33 | 0.668 | 1.067  |
| 2999 | GIY | 1547 | 0.0000864918 | 141.93 | 0.622 | 0.933  |
| 3000 | GIV | 3042 | 0.0001700764 | 122.60 | 0.537 | 2.767  |
| 3001 | GLA | 8401 | 0.0004696949 | 106.30 | 0.466 | 1.733  |
| 3002 | GLR | 6707 | 0.0003749843 | 140.97 | 0.618 | -0.367 |
| 3003 | GLN | 2958 | 0.0001653800 | 117.87 | 0.517 | -0.033 |
| 3004 | GLD | 4618 | 0.0002581896 | 115.40 | 0.506 | -0.033 |
| 3005 | GLC | 2683 | 0.0001500049 | 110.73 | 0.485 | 1.967  |
| 3006 | GLQ | 5682 | 0.0003176772 | 126.10 | 0.553 | -0.033 |
| 3007 | GLE | 6608 | 0.0003694493 | 123.70 | 0.542 | -0.033 |
| 3008 | GLG | 9085 | 0.0005079369 | 97.93  | 0.429 | 1.000  |
| 3009 | GLH | 2825 | 0.0001579441 | 129.63 | 0.568 | 0.067  |
| 3010 | GLI | 4157 | 0.0002324154 | 130.93 | 0.574 | 2.633  |

|      |     |       |              |        |       |        |
|------|-----|-------|--------------|--------|-------|--------|
| 3011 | GLL | 11906 | 0.0006656573 | 130.97 | 0.574 | 2.400  |
| 3012 | GLK | 4814  | 0.0002691479 | 132.07 | 0.579 | -0.167 |
| 3013 | GLM | 1779  | 0.0000994628 | 131.97 | 0.578 | 1.767  |
| 3014 | GLF | 3868  | 0.0002162576 | 140.27 | 0.615 | 2.067  |
| 3015 | GLP | 9176  | 0.0005130246 | 117.27 | 0.514 | 0.600  |
| 3016 | GLS | 9523  | 0.0005324252 | 108.10 | 0.474 | 0.867  |
| 3017 | GLT | 5393  | 0.0003015194 | 116.80 | 0.512 | 0.900  |
| 3018 | GLW | 1522  | 0.0000850941 | 152.37 | 0.668 | 0.833  |
| 3019 | GLY | 2624  | 0.0001467063 | 141.97 | 0.622 | 0.700  |
| 3020 | GLV | 6658  | 0.0003722448 | 122.63 | 0.537 | 2.533  |
| 3021 | GKA | 7331  | 0.0004098718 | 107.40 | 0.471 | -0.833 |
| 3022 | GKR | 3649  | 0.0002040134 | 142.07 | 0.623 | -2.933 |
| 3023 | GKN | 2348  | 0.0001312753 | 118.97 | 0.521 | -2.600 |
| 3024 | GKD | 3248  | 0.0001815937 | 116.50 | 0.511 | -2.600 |
| 3025 | GKC | 1208  | 0.0000675386 | 111.83 | 0.490 | -0.600 |
| 3026 | GKQ | 2264  | 0.0001265789 | 127.20 | 0.557 | -2.600 |
| 3027 | GKE | 4738  | 0.0002648987 | 124.80 | 0.547 | -2.600 |
| 3028 | GKG | 5162  | 0.0002886043 | 99.03  | 0.434 | -1.567 |
| 3029 | GKH | 1435  | 0.0000802300 | 130.73 | 0.573 | -2.500 |
| 3030 | GKI | 3191  | 0.0001784069 | 132.03 | 0.579 | 0.067  |
| 3031 | GKL | 5347  | 0.0002989476 | 132.07 | 0.579 | -0.167 |
| 3032 | GKK | 5269  | 0.0002945866 | 133.17 | 0.584 | -2.733 |
| 3033 | GKM | 1381  | 0.0000772109 | 133.07 | 0.583 | -0.800 |
| 3034 | GKF | 2050  | 0.0001146143 | 141.37 | 0.619 | -0.500 |
| 3035 | GKP | 4206  | 0.0002351549 | 118.37 | 0.519 | -1.967 |
| 3036 | GKS | 5465  | 0.0003055449 | 109.20 | 0.479 | -1.700 |
| 3037 | GKT | 4718  | 0.0002637806 | 117.90 | 0.517 | -1.667 |
| 3038 | GKW | 914   | 0.0000511012 | 153.47 | 0.673 | -1.733 |
| 3039 | GKY | 1823  | 0.0001019228 | 143.07 | 0.627 | -1.867 |
| 3040 | GKV | 4640  | 0.0002594196 | 123.73 | 0.542 | -0.033 |
| 3041 | GMA | 1694  | 0.0000947105 | 107.30 | 0.470 | 1.100  |
| 3042 | GMR | 1002  | 0.0000560212 | 141.97 | 0.622 | -1.000 |
| 3043 | GMN | 915   | 0.0000511571 | 118.87 | 0.521 | -0.667 |
| 3044 | GMD | 1163  | 0.0000650226 | 116.40 | 0.510 | -0.667 |
| 3045 | GMC | 419   | 0.0000234260 | 111.73 | 0.490 | 1.333  |
| 3046 | GMQ | 942   | 0.0000526667 | 127.10 | 0.557 | -0.667 |
| 3047 | GME | 1532  | 0.0000856532 | 124.70 | 0.546 | -0.667 |
| 3048 | GMG | 1587  | 0.0000887282 | 98.93  | 0.434 | 0.367  |
| 3049 | GMH | 407   | 0.0000227551 | 130.63 | 0.572 | -0.567 |
| 3050 | GMI | 900   | 0.0000503185 | 131.93 | 0.578 | 2.000  |
| 3051 | GML | 1927  | 0.0001077374 | 131.97 | 0.578 | 1.767  |
| 3052 | GMK | 1318  | 0.0000736886 | 133.07 | 0.583 | -0.800 |
| 3053 | GMM | 551   | 0.0000308061 | 132.97 | 0.583 | 1.133  |
| 3054 | GMF | 789   | 0.0000441125 | 141.27 | 0.619 | 1.433  |
| 3055 | GMP | 1349  | 0.0000754218 | 118.27 | 0.518 | -0.033 |
| 3056 | GMS | 1397  | 0.0000781054 | 109.10 | 0.478 | 0.233  |
| 3057 | GMT | 1128  | 0.0000630658 | 117.80 | 0.516 | 0.267  |
| 3058 | GMW | 235   | 0.0000131387 | 153.37 | 0.672 | 0.200  |
| 3059 | GMV | 550   | 0.0000307502 | 142.97 | 0.626 | 0.067  |
| 3060 | GMV | 1476  | 0.0000825223 | 123.63 | 0.542 | 1.900  |
| 3061 | GFA | 2238  | 0.0001251252 | 115.60 | 0.507 | 1.400  |
| 3062 | GFR | 2368  | 0.0001323935 | 150.27 | 0.658 | -0.700 |

|      |     |       |              |        |       |        |
|------|-----|-------|--------------|--------|-------|--------|
| 3063 | GFN | 1381  | 0.0000772109 | 127.17 | 0.557 | -0.367 |
| 3064 | GFD | 1643  | 0.0000918591 | 124.70 | 0.546 | -0.367 |
| 3065 | GFC | 1156  | 0.0000646313 | 120.03 | 0.526 | 1.633  |
| 3066 | GFQ | 2021  | 0.0001129929 | 135.40 | 0.593 | -0.367 |
| 3067 | GFE | 1882  | 0.0001052215 | 133.00 | 0.583 | -0.367 |
| 3068 | GFG | 3530  | 0.0001973602 | 107.23 | 0.470 | 0.667  |
| 3069 | GFH | 1280  | 0.0000715640 | 138.93 | 0.609 | -0.267 |
| 3070 | GFI | 2013  | 0.0001125456 | 140.23 | 0.615 | 2.300  |
| 3071 | GFL | 4605  | 0.0002574628 | 140.27 | 0.615 | 2.067  |
| 3072 | GFK | 1687  | 0.0000943192 | 141.37 | 0.619 | -0.500 |
| 3073 | GFM | 771   | 0.0000431061 | 141.27 | 0.619 | 1.433  |
| 3074 | GFF | 1801  | 0.0001006928 | 149.57 | 0.655 | 1.733  |
| 3075 | GFP | 3226  | 0.0001803637 | 126.57 | 0.555 | 0.267  |
| 3076 | GFS | 4377  | 0.0002447155 | 117.40 | 0.514 | 0.533  |
| 3077 | GFT | 2396  | 0.0001339589 | 126.10 | 0.553 | 0.567  |
| 3078 | GFW | 613   | 0.0000342725 | 161.67 | 0.708 | 0.500  |
| 3079 | GFY | 1342  | 0.0000750304 | 151.27 | 0.663 | 0.367  |
| 3080 | GFV | 2455  | 0.0001372576 | 131.93 | 0.578 | 2.200  |
| 3081 | GPA | 7720  | 0.0004316206 | 92.60  | 0.406 | -0.067 |
| 3082 | GPR | 6022  | 0.0003366864 | 127.27 | 0.558 | -2.167 |
| 3083 | GPN | 1973  | 0.0001103092 | 104.17 | 0.456 | -1.833 |
| 3084 | GPD | 3264  | 0.0001824883 | 101.70 | 0.446 | -1.833 |
| 3085 | GPC | 1741  | 0.0000973383 | 97.03  | 0.425 | 0.167  |
| 3086 | GPQ | 4068  | 0.0002274394 | 112.40 | 0.493 | -1.833 |
| 3087 | GPE | 5379  | 0.0003007367 | 110.00 | 0.482 | -1.833 |
| 3088 | GPG | 10388 | 0.0005807868 | 84.23  | 0.369 | -0.800 |
| 3089 | GPH | 1885  | 0.0001053892 | 115.93 | 0.508 | -1.733 |
| 3090 | GPI | 2306  | 0.0001289271 | 117.23 | 0.514 | 0.833  |
| 3091 | GPL | 6623  | 0.0003702879 | 117.27 | 0.514 | 0.600  |
| 3092 | GPK | 3245  | 0.0001814260 | 118.37 | 0.519 | -1.967 |
| 3093 | GPM | 1295  | 0.0000724027 | 118.27 | 0.518 | -0.033 |
| 3094 | GPF | 1992  | 0.0001113715 | 126.57 | 0.555 | 0.267  |
| 3095 | GPP | 10285 | 0.0005750282 | 103.57 | 0.454 | -1.200 |
| 3096 | GPS | 7026  | 0.0003928194 | 94.40  | 0.414 | -0.933 |
| 3097 | GPT | 3448  | 0.0001927756 | 103.10 | 0.452 | -0.900 |
| 3098 | GPW | 1221  | 0.0000682654 | 138.67 | 0.608 | -0.967 |
| 3099 | GPY | 1411  | 0.0000788882 | 128.27 | 0.562 | -1.100 |
| 3100 | GPV | 4602  | 0.0002572951 | 108.93 | 0.477 | 0.733  |
| 3101 | GSA | 7335  | 0.0004100954 | 83.43  | 0.366 | 0.200  |
| 3102 | GSR | 6992  | 0.0003909185 | 118.10 | 0.518 | -1.900 |
| 3103 | GSN | 2946  | 0.0001647091 | 95.00  | 0.416 | -1.567 |
| 3104 | GSD | 4395  | 0.0002457218 | 92.53  | 0.405 | -1.567 |
| 3105 | GSC | 2677  | 0.0001496695 | 87.87  | 0.385 | 0.433  |
| 3106 | GSQ | 4587  | 0.0002564564 | 103.23 | 0.452 | -1.567 |
| 3107 | GSE | 6613  | 0.0003697289 | 100.83 | 0.442 | -1.567 |
| 3108 | GSG | 10712 | 0.0005989015 | 75.07  | 0.329 | -0.533 |
| 3109 | GSH | 2694  | 0.0001506199 | 106.77 | 0.468 | -1.467 |
| 3110 | GSI | 3663  | 0.0002047961 | 108.07 | 0.474 | 1.100  |
| 3111 | GSL | 10216 | 0.0005711704 | 108.10 | 0.474 | 0.867  |
| 3112 | GSK | 4300  | 0.0002404104 | 109.20 | 0.479 | -1.700 |
| 3113 | GSM | 1551  | 0.0000867155 | 109.10 | 0.478 | 0.233  |
| 3114 | GSF | 3808  | 0.0002129030 | 117.40 | 0.514 | 0.533  |

|      |     |       |              |        |       |        |
|------|-----|-------|--------------|--------|-------|--------|
| 3115 | GSP | 9004  | 0.0005034083 | 94.40  | 0.414 | -0.933 |
| 3116 | GSS | 11690 | 0.0006535809 | 85.23  | 0.374 | -0.667 |
| 3117 | GST | 5433  | 0.0003037558 | 93.93  | 0.412 | -0.633 |
| 3118 | GSW | 1829  | 0.0001022583 | 129.50 | 0.567 | -0.700 |
| 3119 | GSY | 2752  | 0.0001538627 | 119.10 | 0.522 | -0.833 |
| 3120 | GSV | 6034  | 0.0003373573 | 99.77  | 0.437 | 1.000  |
| 3121 | GTA | 4957  | 0.0002771429 | 92.13  | 0.404 | 0.233  |
| 3122 | GTR | 3535  | 0.0001976397 | 126.80 | 0.556 | -1.867 |
| 3123 | GTN | 1865  | 0.0001042710 | 103.70 | 0.454 | -1.533 |
| 3124 | GTD | 2663  | 0.0001488867 | 101.23 | 0.444 | -1.533 |
| 3125 | GTC | 1690  | 0.0000944869 | 96.57  | 0.423 | 0.467  |
| 3126 | GTQ | 2863  | 0.0001600686 | 111.93 | 0.491 | -1.533 |
| 3127 | GTE | 4032  | 0.0002254267 | 109.53 | 0.480 | -1.533 |
| 3128 | GTG | 5226  | 0.0002921825 | 83.77  | 0.367 | -0.500 |
| 3129 | GTH | 1516  | 0.0000847586 | 115.47 | 0.506 | -1.433 |
| 3130 | GTI | 2697  | 0.0001507877 | 116.77 | 0.512 | 1.133  |
| 3131 | GTL | 6232  | 0.0003484274 | 116.80 | 0.512 | 0.900  |
| 3132 | GTK | 2642  | 0.0001477126 | 117.90 | 0.517 | -1.667 |
| 3133 | GTM | 1282  | 0.0000716759 | 117.80 | 0.516 | 0.267  |
| 3134 | GTF | 2458  | 0.0001374253 | 126.10 | 0.553 | 0.567  |
| 3135 | GTP | 5492  | 0.0003070544 | 103.10 | 0.452 | -0.900 |
| 3136 | GTS | 5564  | 0.0003110799 | 93.93  | 0.412 | -0.633 |
| 3137 | GTT | 3720  | 0.0002079830 | 102.63 | 0.450 | -0.600 |
| 3138 | GTW | 1072  | 0.0000599349 | 138.20 | 0.606 | -0.667 |
| 3139 | GTY | 1896  | 0.0001060042 | 127.80 | 0.560 | -0.800 |
| 3140 | GTV | 4882  | 0.0002729497 | 108.47 | 0.475 | 1.033  |
| 3141 | GWA | 1176  | 0.0000657495 | 127.70 | 0.560 | 0.167  |
| 3142 | GWR | 1113  | 0.0000622272 | 162.37 | 0.712 | -1.933 |
| 3143 | GWN | 698   | 0.0000390248 | 139.27 | 0.610 | -1.600 |
| 3144 | GWD | 688   | 0.0000384657 | 136.80 | 0.599 | -1.600 |
| 3145 | GWC | 366   | 0.0000204628 | 132.13 | 0.579 | 0.400  |
| 3146 | GWQ | 559   | 0.0000312534 | 147.50 | 0.646 | -1.600 |
| 3147 | GWE | 1005  | 0.0000561889 | 145.10 | 0.636 | -1.600 |
| 3148 | GWG | 1558  | 0.0000871068 | 119.33 | 0.523 | -0.567 |
| 3149 | GWH | 318   | 0.0000177792 | 151.03 | 0.662 | -1.500 |
| 3150 | GWI | 539   | 0.0000301352 | 152.33 | 0.668 | 1.067  |
| 3151 | GWL | 1532  | 0.0000856532 | 152.37 | 0.668 | 0.833  |
| 3152 | GWK | 891   | 0.0000498153 | 153.47 | 0.673 | -1.733 |
| 3153 | GWM | 350   | 0.0000195683 | 153.37 | 0.672 | 0.200  |
| 3154 | GWV | 514   | 0.0000287374 | 161.67 | 0.708 | 0.500  |
| 3155 | GWP | 717   | 0.0000400870 | 138.67 | 0.608 | -0.967 |
| 3156 | GWS | 1123  | 0.0000627863 | 129.50 | 0.567 | -0.700 |
| 3157 | GWT | 849   | 0.0000474671 | 138.20 | 0.606 | -0.667 |
| 3158 | GWW | 336   | 0.0000187856 | 173.77 | 0.761 | -0.733 |
| 3159 | GWY | 330   | 0.0000184501 | 163.37 | 0.716 | -0.867 |
| 3160 | GWV | 911   | 0.0000509335 | 144.03 | 0.631 | 0.967  |
| 3161 | GYA | 1477  | 0.0000825782 | 117.30 | 0.514 | 0.033  |
| 3162 | GYR | 2051  | 0.0001146702 | 151.97 | 0.666 | -2.067 |
| 3163 | GYN | 1261  | 0.0000705018 | 128.87 | 0.565 | -1.733 |
| 3164 | GYD | 1296  | 0.0000724586 | 126.40 | 0.554 | -1.733 |
| 3165 | GYC | 741   | 0.0000414289 | 121.73 | 0.533 | 0.267  |
| 3166 | GYQ | 1319  | 0.0000737445 | 137.10 | 0.601 | -1.733 |

|      |      |      |              |        |       |        |
|------|------|------|--------------|--------|-------|--------|
| 3167 | GYE  | 1474 | 0.0000824105 | 134.70 | 0.590 | -1.733 |
| 3168 | GYG  | 2608 | 0.0001458117 | 108.93 | 0.477 | -0.700 |
| 3169 | GYH  | 855  | 0.0000478025 | 140.63 | 0.616 | -1.633 |
| 3170 | GYI  | 1564 | 0.0000874423 | 141.93 | 0.622 | 0.933  |
| 3171 | GYL  | 2808 | 0.0001569936 | 141.97 | 0.622 | 0.700  |
| 3172 | GYK  | 1309 | 0.0000731854 | 143.07 | 0.627 | -1.867 |
| 3173 | GYM  | 629  | 0.0000351670 | 142.97 | 0.626 | 0.067  |
| 3174 | GYF  | 1315 | 0.0000735209 | 151.27 | 0.663 | 0.367  |
| 3175 | GYP  | 1950 | 0.0001090233 | 128.27 | 0.562 | -1.100 |
| 3176 | GYS  | 2418 | 0.0001351889 | 119.10 | 0.522 | -0.833 |
| 3177 | GYT  | 1700 | 0.0000950460 | 127.80 | 0.560 | -0.800 |
| 3178 | GYW  | 463  | 0.0000258861 | 163.37 | 0.716 | -0.867 |
| 3179 | GY Y | 1078 | 0.0000602703 | 152.97 | 0.670 | -1.000 |
| 3180 | GYV  | 1743 | 0.0000974501 | 133.63 | 0.586 | 0.833  |
| 3181 | GVA  | 4842 | 0.0002707133 | 97.97  | 0.429 | 1.867  |
| 3182 | GVR  | 3666 | 0.0002049639 | 132.63 | 0.581 | -0.233 |
| 3183 | GVN  | 2117 | 0.0001183602 | 109.53 | 0.480 | 0.100  |
| 3184 | GVD  | 2849 | 0.0001592859 | 107.07 | 0.469 | 0.100  |
| 3185 | GVC  | 1842 | 0.0001029851 | 102.40 | 0.449 | 2.100  |
| 3186 | GVQ  | 2755 | 0.0001540304 | 117.77 | 0.516 | 0.100  |
| 3187 | GVE  | 3234 | 0.0001808110 | 115.37 | 0.506 | 0.100  |
| 3188 | GVG  | 5086 | 0.0002843552 | 89.60  | 0.393 | 1.133  |
| 3189 | GVH  | 1585 | 0.0000886164 | 121.30 | 0.532 | 0.200  |
| 3190 | GVI  | 3364 | 0.0001880792 | 122.60 | 0.537 | 2.767  |
| 3191 | GVL  | 6520 | 0.0003645293 | 122.63 | 0.537 | 2.533  |
| 3192 | GVK  | 3178 | 0.0001776801 | 123.73 | 0.542 | -0.033 |
| 3193 | GVM  | 1070 | 0.0000598231 | 123.63 | 0.542 | 1.900  |
| 3194 | GVF  | 2519 | 0.0001408358 | 131.93 | 0.578 | 2.200  |
| 3195 | GVP  | 5028 | 0.0002811125 | 108.93 | 0.477 | 0.733  |
| 3196 | GVS  | 5250 | 0.0002935244 | 99.77  | 0.437 | 1.000  |
| 3197 | GVT  | 3681 | 0.0002058025 | 108.47 | 0.475 | 1.033  |
| 3198 | GVW  | 891  | 0.0000498153 | 144.03 | 0.631 | 0.967  |
| 3199 | GVY  | 1746 | 0.0000976178 | 133.63 | 0.586 | 0.833  |
| 3200 | GVV  | 4588 | 0.0002565123 | 114.30 | 0.501 | 2.667  |
| 3201 | HAA  | 2306 | 0.0001289271 | 113.33 | 0.497 | 0.133  |
| 3202 | HAR  | 1467 | 0.0000820191 | 148.00 | 0.649 | -1.967 |
| 3203 | HAN  | 703  | 0.0000393043 | 124.90 | 0.547 | -1.633 |
| 3204 | HAD  | 1027 | 0.0000574190 | 122.43 | 0.537 | -1.633 |
| 3205 | HAC  | 535  | 0.0000299115 | 117.77 | 0.516 | 0.367  |
| 3206 | HAQ  | 1206 | 0.0000674267 | 133.13 | 0.583 | -1.633 |
| 3207 | HAE  | 1520 | 0.0000849823 | 130.73 | 0.573 | -1.633 |
| 3208 | HAG  | 2045 | 0.0001143347 | 104.97 | 0.460 | -0.600 |
| 3209 | HAH  | 794  | 0.0000443921 | 136.67 | 0.599 | -1.533 |
| 3210 | HAI  | 1019 | 0.0000569717 | 137.97 | 0.605 | 1.033  |
| 3211 | HAL  | 2526 | 0.0001412271 | 138.00 | 0.605 | 0.800  |
| 3212 | HAK  | 1077 | 0.0000602144 | 139.10 | 0.610 | -1.767 |
| 3213 | HAM  | 422  | 0.0000235938 | 139.00 | 0.609 | 0.167  |
| 3214 | HAF  | 869  | 0.0000485853 | 147.30 | 0.645 | 0.467  |
| 3215 | HAP  | 1386 | 0.0000774904 | 124.30 | 0.545 | -1.000 |
| 3216 | HAS  | 1932 | 0.0001080170 | 115.13 | 0.505 | -0.733 |
| 3217 | HAT  | 1217 | 0.0000680417 | 123.83 | 0.543 | -0.700 |
| 3218 | HAW  | 325  | 0.0000181706 | 159.40 | 0.699 | -0.767 |

|      |     |      |              |        |       |        |
|------|-----|------|--------------|--------|-------|--------|
| 3219 | HAY | 624  | 0.0000348875 | 149.00 | 0.653 | -0.900 |
| 3220 | HAV | 1731 | 0.0000967792 | 129.67 | 0.568 | 0.933  |
| 3221 | HRA | 2202 | 0.0001231125 | 148.00 | 0.649 | -1.967 |
| 3222 | HRR | 2610 | 0.0001459235 | 182.67 | 0.800 | -4.067 |
| 3223 | HRN | 904  | 0.0000505421 | 159.57 | 0.699 | -3.733 |
| 3224 | HRD | 1923 | 0.0001075138 | 157.10 | 0.688 | -3.733 |
| 3225 | HRC | 636  | 0.0000355584 | 152.43 | 0.668 | -1.733 |
| 3226 | HRQ | 1302 | 0.0000727940 | 167.80 | 0.735 | -3.733 |
| 3227 | HRE | 1751 | 0.0000978974 | 165.40 | 0.725 | -3.733 |
| 3228 | HRG | 2127 | 0.0001189193 | 139.63 | 0.612 | -2.700 |
| 3229 | HRH | 1166 | 0.0000651904 | 171.33 | 0.751 | -3.633 |
| 3230 | HRI | 1419 | 0.0000793354 | 172.63 | 0.757 | -1.067 |
| 3231 | HRL | 3008 | 0.0001681755 | 172.67 | 0.757 | -1.300 |
| 3232 | HRK | 1697 | 0.0000948783 | 173.77 | 0.761 | -3.867 |
| 3233 | HRM | 532  | 0.0000297438 | 173.67 | 0.761 | -1.933 |
| 3234 | HRF | 961  | 0.0000537289 | 181.97 | 0.797 | -1.633 |
| 3235 | HRP | 1902 | 0.0001063397 | 158.97 | 0.697 | -3.100 |
| 3236 | HRS | 2133 | 0.0001192547 | 149.80 | 0.656 | -2.833 |
| 3237 | HRT | 1252 | 0.0000699986 | 158.50 | 0.695 | -2.800 |
| 3238 | HRW | 357  | 0.0000199597 | 194.07 | 0.850 | -2.867 |
| 3239 | HRY | 722  | 0.0000403666 | 183.67 | 0.805 | -3.000 |
| 3240 | HRV | 1815 | 0.0001014756 | 164.33 | 0.720 | -1.167 |
| 3241 | HNA | 819  | 0.0000457898 | 124.90 | 0.547 | -1.633 |
| 3242 | HNR | 731  | 0.0000408698 | 159.57 | 0.699 | -3.733 |
| 3243 | HNN | 675  | 0.0000377388 | 136.47 | 0.598 | -3.400 |
| 3244 | HND | 575  | 0.0000321479 | 134.00 | 0.587 | -3.400 |
| 3245 | HNC | 424  | 0.0000237056 | 129.33 | 0.567 | -1.400 |
| 3246 | HNQ | 650  | 0.0000363411 | 144.70 | 0.634 | -3.400 |
| 3247 | HNE | 777  | 0.0000434416 | 142.30 | 0.624 | -3.400 |
| 3248 | HNG | 1221 | 0.0000682654 | 116.53 | 0.511 | -2.367 |
| 3249 | HNH | 439  | 0.0000245442 | 148.23 | 0.650 | -3.300 |
| 3250 | HNI | 821  | 0.0000459016 | 149.53 | 0.655 | -0.733 |
| 3251 | HNL | 1748 | 0.0000977296 | 149.57 | 0.655 | -0.967 |
| 3252 | HNK | 795  | 0.0000444480 | 150.67 | 0.660 | -3.533 |
| 3253 | HNM | 294  | 0.0000164374 | 150.57 | 0.660 | -1.600 |
| 3254 | HNF | 719  | 0.0000401989 | 158.87 | 0.696 | -1.300 |
| 3255 | HNP | 886  | 0.0000495357 | 135.87 | 0.595 | -2.767 |
| 3256 | HNS | 1202 | 0.0000672031 | 126.70 | 0.555 | -2.500 |
| 3257 | HNT | 748  | 0.0000418202 | 135.40 | 0.593 | -2.467 |
| 3258 | HNW | 199  | 0.0000111260 | 170.97 | 0.749 | -2.533 |
| 3259 | HNY | 515  | 0.0000287933 | 160.57 | 0.704 | -2.667 |
| 3260 | HNV | 801  | 0.0000447834 | 141.23 | 0.619 | -0.833 |
| 3261 | HDA | 946  | 0.0000528903 | 122.43 | 0.537 | -1.633 |
| 3262 | HDR | 772  | 0.0000431621 | 157.10 | 0.688 | -3.733 |
| 3263 | HDN | 633  | 0.0000353907 | 134.00 | 0.587 | -3.400 |
| 3264 | HDD | 717  | 0.0000400870 | 131.53 | 0.576 | -3.400 |
| 3265 | HDC | 348  | 0.0000194565 | 126.87 | 0.556 | -1.400 |
| 3266 | HDQ | 656  | 0.0000366766 | 142.23 | 0.623 | -3.400 |
| 3267 | HDE | 879  | 0.0000491444 | 139.83 | 0.613 | -3.400 |
| 3268 | HDG | 1239 | 0.0000692717 | 114.07 | 0.500 | -2.367 |
| 3269 | HDH | 460  | 0.0000257183 | 145.77 | 0.639 | -3.300 |
| 3270 | HDI | 855  | 0.0000478025 | 147.07 | 0.644 | -0.733 |

|      |     |      |              |        |       |        |
|------|-----|------|--------------|--------|-------|--------|
| 3271 | HDL | 1688 | 0.0000943751 | 147.10 | 0.645 | -0.967 |
| 3272 | HDK | 744  | 0.0000415966 | 148.20 | 0.649 | -3.533 |
| 3273 | HDM | 292  | 0.0000163255 | 148.10 | 0.649 | -1.600 |
| 3274 | HDF | 749  | 0.0000418761 | 156.40 | 0.685 | -1.300 |
| 3275 | HDP | 967  | 0.0000540644 | 133.40 | 0.585 | -2.767 |
| 3276 | HDS | 1264 | 0.0000706695 | 124.23 | 0.544 | -2.500 |
| 3277 | HDT | 652  | 0.0000364529 | 132.93 | 0.583 | -2.467 |
| 3278 | HDW | 190  | 0.0000106228 | 168.50 | 0.738 | -2.533 |
| 3279 | HDY | 452  | 0.0000252710 | 158.10 | 0.693 | -2.667 |
| 3280 | HDV | 1016 | 0.0000568040 | 138.77 | 0.608 | -0.833 |
| 3281 | HCA | 793  | 0.0000443362 | 117.77 | 0.516 | 0.367  |
| 3282 | HCR | 834  | 0.0000466284 | 152.43 | 0.668 | -1.733 |
| 3283 | HCN | 416  | 0.0000232583 | 129.33 | 0.567 | -1.400 |
| 3284 | HCD | 571  | 0.0000319243 | 126.87 | 0.556 | -1.400 |
| 3285 | HCC | 411  | 0.0000229788 | 122.20 | 0.535 | 0.600  |
| 3286 | HCQ | 703  | 0.0000393043 | 137.57 | 0.603 | -1.400 |
| 3287 | HCE | 764  | 0.0000427148 | 135.17 | 0.592 | -1.400 |
| 3288 | HCG | 958  | 0.0000535612 | 109.40 | 0.479 | -0.367 |
| 3289 | HCH | 535  | 0.0000299115 | 141.10 | 0.618 | -1.300 |
| 3290 | HCI | 566  | 0.0000316447 | 142.40 | 0.624 | 1.267  |
| 3291 | HCL | 1254 | 0.0000701104 | 142.43 | 0.624 | 1.033  |
| 3292 | HCK | 728  | 0.0000407020 | 143.53 | 0.629 | -1.533 |
| 3293 | HCM | 204  | 0.0000114055 | 143.43 | 0.629 | 0.400  |
| 3294 | HCF | 581  | 0.0000324834 | 151.73 | 0.665 | 0.700  |
| 3295 | HCP | 999  | 0.0000558535 | 128.73 | 0.564 | -0.767 |
| 3296 | HCS | 1307 | 0.0000730736 | 119.57 | 0.524 | -0.500 |
| 3297 | HCT | 642  | 0.0000358938 | 128.27 | 0.562 | -0.467 |
| 3298 | HCW | 172  | 0.0000096164 | 163.83 | 0.718 | -0.533 |
| 3299 | HCY | 287  | 0.0000160460 | 153.43 | 0.672 | -0.667 |
| 3300 | HCV | 746  | 0.0000417084 | 134.10 | 0.588 | 1.167  |
| 3301 | HQA | 1736 | 0.0000970587 | 133.13 | 0.583 | -1.633 |
| 3302 | HQR | 3751 | 0.0002097162 | 167.80 | 0.735 | -3.733 |
| 3303 | HQN | 871  | 0.0000486971 | 144.70 | 0.634 | -3.400 |
| 3304 | HQD | 1078 | 0.0000602703 | 142.23 | 0.623 | -3.400 |
| 3305 | HQC | 475  | 0.0000265570 | 137.57 | 0.603 | -1.400 |
| 3306 | HQQ | 1433 | 0.0000801182 | 152.93 | 0.670 | -3.400 |
| 3307 | HQE | 1724 | 0.0000963878 | 150.53 | 0.660 | -3.400 |
| 3308 | HQG | 1496 | 0.0000836405 | 124.77 | 0.547 | -2.367 |
| 3309 | HQH | 854  | 0.0000477466 | 156.47 | 0.686 | -3.300 |
| 3310 | HQI | 981  | 0.0000548471 | 157.77 | 0.691 | -0.733 |
| 3311 | HQL | 2434 | 0.0001360835 | 157.80 | 0.691 | -0.967 |
| 3312 | HQK | 1824 | 0.0001019787 | 158.90 | 0.696 | -3.533 |
| 3313 | HQM | 397  | 0.0000221960 | 158.80 | 0.696 | -1.600 |
| 3314 | HQF | 630  | 0.0000352229 | 167.10 | 0.732 | -1.300 |
| 3315 | HQP | 1334 | 0.0000745831 | 144.10 | 0.631 | -2.767 |
| 3316 | HQS | 1508 | 0.0000843114 | 134.93 | 0.591 | -2.500 |
| 3317 | HQT | 1027 | 0.0000574190 | 143.63 | 0.629 | -2.467 |
| 3318 | HQW | 332  | 0.0000185619 | 179.20 | 0.785 | -2.533 |
| 3319 | HQY | 481  | 0.0000268924 | 168.80 | 0.740 | -2.667 |
| 3320 | HQV | 1410 | 0.0000788323 | 149.47 | 0.655 | -0.833 |
| 3321 | HEA | 1942 | 0.0001085761 | 130.73 | 0.573 | -1.633 |
| 3322 | HER | 1843 | 0.0001030410 | 165.40 | 0.725 | -3.733 |



|      |     |      |              |        |       |        |
|------|-----|------|--------------|--------|-------|--------|
| 3323 | HEN | 1089 | 0.0000608853 | 142.30 | 0.624 | -3.400 |
| 3324 | HED | 1499 | 0.0000838082 | 139.83 | 0.613 | -3.400 |
| 3325 | HEC | 564  | 0.0000315329 | 135.17 | 0.592 | -1.400 |
| 3326 | HEQ | 998  | 0.0000557976 | 150.53 | 0.660 | -3.400 |
| 3327 | HEE | 2018 | 0.0001128252 | 148.13 | 0.649 | -3.400 |
| 3328 | HEG | 1470 | 0.0000821868 | 122.37 | 0.536 | -2.367 |
| 3329 | HEH | 586  | 0.0000327629 | 154.07 | 0.675 | -3.300 |
| 3330 | HEI | 1035 | 0.0000578662 | 155.37 | 0.681 | -0.733 |
| 3331 | HEL | 2161 | 0.0001208202 | 155.40 | 0.681 | -0.967 |
| 3332 | HEK | 1516 | 0.0000847586 | 156.50 | 0.686 | -3.533 |
| 3333 | HEM | 523  | 0.0000292406 | 156.40 | 0.685 | -1.600 |
| 3334 | HEF | 730  | 0.0000408139 | 164.70 | 0.722 | -1.300 |
| 3335 | HEP | 910  | 0.0000508776 | 141.70 | 0.621 | -2.767 |
| 3336 | HES | 1302 | 0.0000727940 | 132.53 | 0.581 | -2.500 |
| 3337 | HET | 1031 | 0.0000576426 | 141.23 | 0.619 | -2.467 |
| 3338 | HEW | 255  | 0.0000142569 | 176.80 | 0.775 | -2.533 |
| 3339 | HEY | 500  | 0.0000279547 | 166.40 | 0.729 | -2.667 |
| 3340 | HEV | 1443 | 0.0000806773 | 147.07 | 0.644 | -0.833 |
| 3341 | HGA | 2070 | 0.0001157325 | 104.97 | 0.460 | -0.600 |
| 3342 | HGR | 1880 | 0.0001051097 | 139.63 | 0.612 | -2.700 |
| 3343 | HGN | 1069 | 0.0000597671 | 116.53 | 0.511 | -2.367 |
| 3344 | HGD | 1578 | 0.0000882250 | 114.07 | 0.500 | -2.367 |
| 3345 | HGC | 650  | 0.0000363411 | 109.40 | 0.479 | -0.367 |
| 3346 | HGQ | 1316 | 0.0000735768 | 124.77 | 0.547 | -2.367 |
| 3347 | HGE | 1734 | 0.0000969469 | 122.37 | 0.536 | -2.367 |
| 3348 | HGG | 2369 | 0.0001324494 | 96.60  | 0.423 | -1.333 |
| 3349 | HGH | 1097 | 0.0000613326 | 128.30 | 0.562 | -2.267 |
| 3350 | HGI | 1368 | 0.0000764841 | 129.60 | 0.568 | 0.300  |
| 3351 | HGL | 2748 | 0.0001536390 | 129.63 | 0.568 | 0.067  |
| 3352 | HGK | 1412 | 0.0000789441 | 130.73 | 0.573 | -2.500 |
| 3353 | HGM | 483  | 0.0000270042 | 130.63 | 0.572 | -0.567 |
| 3354 | HGF | 1046 | 0.0000584812 | 138.93 | 0.609 | -0.267 |
| 3355 | HGP | 1859 | 0.0001039356 | 115.93 | 0.508 | -1.733 |
| 3356 | HGS | 2579 | 0.0001441903 | 106.77 | 0.468 | -1.467 |
| 3357 | HGT | 1433 | 0.0000801182 | 115.47 | 0.506 | -1.433 |
| 3358 | HGW | 356  | 0.0000199037 | 151.03 | 0.662 | -1.500 |
| 3359 | HGY | 808  | 0.0000451748 | 140.63 | 0.616 | -1.633 |
| 3360 | HGV | 1848 | 0.0001033206 | 121.30 | 0.532 | 0.200  |
| 3361 | HHA | 882  | 0.0000493121 | 136.67 | 0.599 | -1.533 |
| 3362 | HHR | 1203 | 0.0000672590 | 171.33 | 0.751 | -3.633 |
| 3363 | HHN | 463  | 0.0000258861 | 148.23 | 0.650 | -3.300 |
| 3364 | HHD | 564  | 0.0000315329 | 145.77 | 0.639 | -3.300 |
| 3365 | HHC | 552  | 0.0000308620 | 141.10 | 0.618 | -1.300 |
| 3366 | HHQ | 975  | 0.0000545117 | 156.47 | 0.686 | -3.300 |
| 3367 | HHE | 825  | 0.0000461253 | 154.07 | 0.675 | -3.300 |
| 3368 | HHG | 991  | 0.0000554062 | 128.30 | 0.562 | -2.267 |
| 3369 | HHH | 1654 | 0.0000924741 | 160.00 | 0.701 | -3.200 |
| 3370 | HHI | 716  | 0.0000400311 | 161.30 | 0.707 | -0.633 |
| 3371 | HHL | 1741 | 0.0000973383 | 161.33 | 0.707 | -0.867 |
| 3372 | HHK | 636  | 0.0000355584 | 162.43 | 0.712 | -3.433 |
| 3373 | HHM | 265  | 0.0000148160 | 162.33 | 0.711 | -1.500 |
| 3374 | HHF | 582  | 0.0000325393 | 170.63 | 0.748 | -1.200 |

|      |     |      |              |        |       |        |
|------|-----|------|--------------|--------|-------|--------|
| 3375 | HHP | 1318 | 0.0000736886 | 147.63 | 0.647 | -2.667 |
| 3376 | HHS | 1217 | 0.0000680417 | 138.47 | 0.607 | -2.400 |
| 3377 | HHT | 759  | 0.0000424352 | 147.17 | 0.645 | -2.367 |
| 3378 | HHW | 271  | 0.0000151514 | 182.73 | 0.801 | -2.433 |
| 3379 | HHY | 440  | 0.0000246001 | 172.33 | 0.755 | -2.567 |
| 3380 | HHV | 949  | 0.0000530580 | 153.00 | 0.670 | -0.733 |
| 3381 | HIA | 1147 | 0.0000641281 | 137.97 | 0.605 | 1.033  |
| 3382 | HIR | 1407 | 0.0000786645 | 172.63 | 0.757 | -1.067 |
| 3383 | HIN | 869  | 0.0000485853 | 149.53 | 0.655 | -0.733 |
| 3384 | HID | 853  | 0.0000476907 | 147.07 | 0.644 | -0.733 |
| 3385 | HIC | 719  | 0.0000401989 | 142.40 | 0.624 | 1.267  |
| 3386 | HIQ | 1153 | 0.0000644635 | 157.77 | 0.691 | -0.733 |
| 3387 | HIE | 1075 | 0.0000601026 | 155.37 | 0.681 | -0.733 |
| 3388 | HIG | 1063 | 0.0000594317 | 129.60 | 0.568 | 0.300  |
| 3389 | HIH | 835  | 0.0000466843 | 161.30 | 0.707 | -0.633 |
| 3390 | HII | 979  | 0.0000547353 | 162.60 | 0.713 | 1.933  |
| 3391 | HIL | 2197 | 0.0001228329 | 162.63 | 0.713 | 1.700  |
| 3392 | HIK | 1304 | 0.0000729059 | 163.73 | 0.717 | -0.867 |
| 3393 | HIM | 383  | 0.0000214133 | 163.63 | 0.717 | 1.067  |
| 3394 | HIF | 948  | 0.0000530021 | 171.93 | 0.753 | 1.367  |
| 3395 | HIP | 1411 | 0.0000788882 | 148.93 | 0.653 | -0.100 |
| 3396 | HIS | 1830 | 0.0001023142 | 139.77 | 0.612 | 0.167  |
| 3397 | HIT | 1199 | 0.0000670354 | 148.47 | 0.651 | 0.200  |
| 3398 | HIW | 294  | 0.0000164374 | 184.03 | 0.806 | 0.133  |
| 3399 | HIY | 932  | 0.0000521076 | 173.63 | 0.761 | 0.000  |
| 3400 | HIV | 1088 | 0.0000608294 | 154.30 | 0.676 | 1.833  |
| 3401 | HLA | 3794 | 0.0002121203 | 138.00 | 0.605 | 0.800  |
| 3402 | HLR | 3426 | 0.0001915456 | 172.67 | 0.757 | -1.300 |
| 3403 | HLN | 1818 | 0.0001016433 | 149.57 | 0.655 | -0.967 |
| 3404 | HLD | 2488 | 0.0001391026 | 147.10 | 0.645 | -0.967 |
| 3405 | HLC | 1390 | 0.0000777141 | 142.43 | 0.624 | 1.033  |
| 3406 | HLQ | 3166 | 0.0001770092 | 157.80 | 0.691 | -0.967 |
| 3407 | HLE | 3749 | 0.0002096043 | 155.40 | 0.681 | -0.967 |
| 3408 | HLG | 3192 | 0.0001784628 | 129.63 | 0.568 | 0.067  |
| 3409 | HLH | 1837 | 0.0001027056 | 161.33 | 0.707 | -0.867 |
| 3410 | HLI | 2094 | 0.0001170743 | 162.63 | 0.713 | 1.700  |
| 3411 | HLL | 5720 | 0.0003198018 | 162.67 | 0.713 | 1.467  |
| 3412 | HLK | 3066 | 0.0001714182 | 163.77 | 0.718 | -1.100 |
| 3413 | HLM | 860  | 0.0000480821 | 163.67 | 0.717 | 0.833  |
| 3414 | HLF | 1677 | 0.0000937601 | 171.97 | 0.754 | 1.133  |
| 3415 | HLP | 3519 | 0.0001967452 | 148.97 | 0.653 | -0.333 |
| 3416 | HLS | 4011 | 0.0002242526 | 139.80 | 0.613 | -0.067 |
| 3417 | HLT | 2783 | 0.0001555959 | 148.50 | 0.651 | -0.033 |
| 3418 | HLW | 652  | 0.0000364529 | 184.07 | 0.807 | -0.100 |
| 3419 | HLY | 1366 | 0.0000763722 | 173.67 | 0.761 | -0.233 |
| 3420 | HLV | 3121 | 0.0001744932 | 154.33 | 0.676 | 1.600  |
| 3421 | HKA | 1545 | 0.0000863800 | 139.10 | 0.610 | -1.767 |
| 3422 | HKR | 1991 | 0.0001113156 | 173.77 | 0.761 | -3.867 |
| 3423 | HKN | 890  | 0.0000497594 | 150.67 | 0.660 | -3.533 |
| 3424 | HKD | 1214 | 0.0000678740 | 148.20 | 0.649 | -3.533 |
| 3425 | HKC | 653  | 0.0000365088 | 143.53 | 0.629 | -1.533 |
| 3426 | HKQ | 1012 | 0.0000565803 | 158.90 | 0.696 | -3.533 |

|      |     |      |              |        |       |        |
|------|-----|------|--------------|--------|-------|--------|
| 3427 | HKE | 1713 | 0.0000957728 | 156.50 | 0.686 | -3.533 |
| 3428 | HKG | 1384 | 0.0000773786 | 130.73 | 0.573 | -2.500 |
| 3429 | HKH | 634  | 0.0000354466 | 162.43 | 0.712 | -3.433 |
| 3430 | HKI | 1365 | 0.0000763163 | 163.73 | 0.717 | -0.867 |
| 3431 | HKL | 1905 | 0.0001065074 | 163.77 | 0.718 | -1.100 |
| 3432 | HKK | 1809 | 0.0001011401 | 164.87 | 0.722 | -3.667 |
| 3433 | HKM | 466  | 0.0000260538 | 164.77 | 0.722 | -1.733 |
| 3434 | HKF | 682  | 0.0000381302 | 173.07 | 0.758 | -1.433 |
| 3435 | HKP | 1102 | 0.0000616122 | 150.07 | 0.658 | -2.900 |
| 3436 | HKS | 1391 | 0.0000777700 | 140.90 | 0.617 | -2.633 |
| 3437 | HKT | 1070 | 0.0000598231 | 149.60 | 0.656 | -2.600 |
| 3438 | HKW | 198  | 0.0000110701 | 185.17 | 0.811 | -2.667 |
| 3439 | HKY | 640  | 0.0000357820 | 174.77 | 0.766 | -2.800 |
| 3440 | HKV | 1464 | 0.0000818514 | 155.43 | 0.681 | -0.967 |
| 3441 | HMA | 710  | 0.0000396957 | 139.00 | 0.609 | 0.167  |
| 3442 | HMR | 644  | 0.0000360057 | 173.67 | 0.761 | -1.933 |
| 3443 | HMN | 381  | 0.0000213015 | 150.57 | 0.660 | -1.600 |
| 3444 | HMD | 499  | 0.0000278988 | 148.10 | 0.649 | -1.600 |
| 3445 | HMC | 224  | 0.0000125237 | 143.43 | 0.629 | 0.400  |
| 3446 | HMQ | 488  | 0.0000272838 | 158.80 | 0.696 | -1.600 |
| 3447 | HME | 695  | 0.0000388570 | 156.40 | 0.685 | -1.600 |
| 3448 | HMG | 586  | 0.0000327629 | 130.63 | 0.572 | -0.567 |
| 3449 | HMH | 299  | 0.0000167169 | 162.33 | 0.711 | -1.500 |
| 3450 | HMI | 396  | 0.0000221401 | 163.63 | 0.717 | 1.067  |
| 3451 | HML | 872  | 0.0000487530 | 163.67 | 0.717 | 0.833  |
| 3452 | HMK | 685  | 0.0000382979 | 164.77 | 0.722 | -1.733 |
| 3453 | HMM | 230  | 0.0000128592 | 164.67 | 0.722 | 0.200  |
| 3454 | HMF | 324  | 0.0000181146 | 172.97 | 0.758 | 0.500  |
| 3455 | HMP | 531  | 0.0000296879 | 149.97 | 0.657 | -0.967 |
| 3456 | HMS | 498  | 0.0000278429 | 140.80 | 0.617 | -0.700 |
| 3457 | HMT | 433  | 0.0000242088 | 149.50 | 0.655 | -0.667 |
| 3458 | HMW | 88   | 0.0000049200 | 185.07 | 0.811 | -0.733 |
| 3459 | HMY | 319  | 0.0000178351 | 174.67 | 0.765 | -0.867 |
| 3460 | HMV | 634  | 0.0000354466 | 155.33 | 0.681 | 0.967  |
| 3461 | HFA | 975  | 0.0000545117 | 147.30 | 0.645 | 0.467  |
| 3462 | HFR | 1097 | 0.0000613326 | 181.97 | 0.797 | -1.633 |
| 3463 | HFN | 746  | 0.0000417084 | 158.87 | 0.696 | -1.300 |
| 3464 | HFD | 759  | 0.0000424352 | 156.40 | 0.685 | -1.300 |
| 3465 | HFC | 510  | 0.0000285138 | 151.73 | 0.665 | 0.700  |
| 3466 | HFQ | 1128 | 0.0000630658 | 167.10 | 0.732 | -1.300 |
| 3467 | HFE | 968  | 0.0000541203 | 164.70 | 0.722 | -1.300 |
| 3468 | HFG | 1019 | 0.0000569717 | 138.93 | 0.609 | -0.267 |
| 3469 | HFH | 717  | 0.0000400870 | 170.63 | 0.748 | -1.200 |
| 3470 | HFI | 873  | 0.0000488089 | 171.93 | 0.753 | 1.367  |
| 3471 | HFL | 2103 | 0.0001175775 | 171.97 | 0.754 | 1.133  |
| 3472 | HFK | 879  | 0.0000491444 | 173.07 | 0.758 | -1.433 |
| 3473 | HFM | 365  | 0.0000204069 | 172.97 | 0.758 | 0.500  |
| 3474 | HFF | 900  | 0.0000503185 | 181.27 | 0.794 | 0.800  |
| 3475 | HFP | 1220 | 0.0000682095 | 158.27 | 0.694 | -0.667 |
| 3476 | HFS | 1827 | 0.0001021465 | 149.10 | 0.653 | -0.400 |
| 3477 | HFT | 1122 | 0.0000627303 | 157.80 | 0.691 | -0.367 |
| 3478 | HFV | 287  | 0.0000160460 | 193.37 | 0.847 | -0.433 |

|      |     |      |              |        |       |        |
|------|-----|------|--------------|--------|-------|--------|
| 3479 | HFY | 640  | 0.0000357820 | 182.97 | 0.802 | -0.567 |
| 3480 | HFV | 1024 | 0.0000572512 | 163.63 | 0.717 | 1.267  |
| 3481 | HPA | 2420 | 0.0001353008 | 124.30 | 0.545 | -1.000 |
| 3482 | HPR | 1703 | 0.0000952137 | 158.97 | 0.697 | -3.100 |
| 3483 | HPN | 1286 | 0.0000718995 | 135.87 | 0.595 | -2.767 |
| 3484 | HPD | 1834 | 0.0001025378 | 133.40 | 0.585 | -2.767 |
| 3485 | HPC | 623  | 0.0000348316 | 128.73 | 0.564 | -0.767 |
| 3486 | HPQ | 1669 | 0.0000933128 | 144.10 | 0.631 | -2.767 |
| 3487 | HPE | 2454 | 0.0001372017 | 141.70 | 0.621 | -2.767 |
| 3488 | HPG | 2829 | 0.0001581677 | 115.93 | 0.508 | -1.733 |
| 3489 | HPH | 1143 | 0.0000639044 | 147.63 | 0.647 | -2.667 |
| 3490 | HPI | 892  | 0.0000498712 | 148.93 | 0.653 | -0.100 |
| 3491 | HPL | 2601 | 0.0001454203 | 148.97 | 0.653 | -0.333 |
| 3492 | HPK | 1149 | 0.0000642399 | 150.07 | 0.658 | -2.900 |
| 3493 | HPM | 427  | 0.0000238733 | 149.97 | 0.657 | -0.967 |
| 3494 | HPF | 1098 | 0.0000613885 | 158.27 | 0.694 | -0.667 |
| 3495 | HPP | 2407 | 0.0001345739 | 135.27 | 0.593 | -2.133 |
| 3496 | HPS | 3028 | 0.0001692937 | 126.10 | 0.553 | -1.867 |
| 3497 | HPT | 1466 | 0.0000819632 | 134.80 | 0.591 | -1.833 |
| 3498 | HPW | 414  | 0.0000231465 | 170.37 | 0.747 | -1.900 |
| 3499 | HPY | 737  | 0.0000412052 | 159.97 | 0.701 | -2.033 |
| 3500 | HPV | 1715 | 0.0000958846 | 140.63 | 0.616 | -0.200 |
| 3501 | HSA | 2664 | 0.0001489426 | 115.13 | 0.505 | -0.733 |
| 3502 | HSR | 2397 | 0.0001340148 | 149.80 | 0.656 | -2.833 |
| 3503 | HSN | 1285 | 0.0000718436 | 126.70 | 0.555 | -2.500 |
| 3504 | HSD | 1749 | 0.0000977855 | 124.23 | 0.544 | -2.500 |
| 3505 | HSC | 898  | 0.0000502066 | 119.57 | 0.524 | -0.500 |
| 3506 | HSQ | 2059 | 0.0001151175 | 134.93 | 0.591 | -2.500 |
| 3507 | HSE | 2376 | 0.0001328407 | 132.53 | 0.581 | -2.500 |
| 3508 | HSG | 3395 | 0.0001898124 | 106.77 | 0.468 | -1.467 |
| 3509 | HSH | 1485 | 0.0000830255 | 138.47 | 0.607 | -2.400 |
| 3510 | HSI | 1507 | 0.0000842555 | 139.77 | 0.612 | 0.167  |
| 3511 | HSL | 4435 | 0.0002479582 | 139.80 | 0.613 | -0.067 |
| 3512 | HSK | 1872 | 0.0001046624 | 140.90 | 0.617 | -2.633 |
| 3513 | HSM | 789  | 0.0000441125 | 140.80 | 0.617 | -0.700 |
| 3514 | HSF | 1641 | 0.0000917473 | 149.10 | 0.653 | -0.400 |
| 3515 | HSP | 3308 | 0.0001849483 | 126.10 | 0.553 | -1.867 |
| 3516 | HSS | 4566 | 0.0002552823 | 116.93 | 0.512 | -1.600 |
| 3517 | HST | 2187 | 0.0001222739 | 125.63 | 0.551 | -1.567 |
| 3518 | HSW | 605  | 0.0000338252 | 161.20 | 0.706 | -1.633 |
| 3519 | HSY | 1076 | 0.0000601585 | 150.80 | 0.661 | -1.767 |
| 3520 | HSV | 2226 | 0.0001244543 | 131.47 | 0.576 | 0.067  |
| 3521 | HTA | 1851 | 0.0001034883 | 123.83 | 0.543 | -0.700 |
| 3522 | HTR | 1391 | 0.0000777700 | 158.50 | 0.695 | -2.800 |
| 3523 | HTN | 703  | 0.0000393043 | 135.40 | 0.593 | -2.467 |
| 3524 | HTD | 1041 | 0.0000582017 | 132.93 | 0.583 | -2.467 |
| 3525 | HTC | 669  | 0.0000374034 | 128.27 | 0.562 | -0.467 |
| 3526 | HTQ | 1217 | 0.0000680417 | 143.63 | 0.629 | -2.467 |
| 3527 | HTE | 1553 | 0.0000868273 | 141.23 | 0.619 | -2.467 |
| 3528 | HTG | 7355 | 0.0004112136 | 115.47 | 0.506 | -1.433 |
| 3529 | HTH | 872  | 0.0000487530 | 147.17 | 0.645 | -2.367 |
| 3530 | HTI | 914  | 0.0000511012 | 148.47 | 0.651 | 0.200  |

|      |     |      |              |        |       |        |
|------|-----|------|--------------|--------|-------|--------|
| 3531 | HTL | 2608 | 0.0001458117 | 148.50 | 0.651 | -0.033 |
| 3532 | HTK | 1238 | 0.0000692158 | 149.60 | 0.656 | -2.600 |
| 3533 | HTM | 392  | 0.0000219165 | 149.50 | 0.655 | -0.667 |
| 3534 | HTF | 963  | 0.0000538408 | 157.80 | 0.691 | -0.367 |
| 3535 | HTP | 1766 | 0.0000987360 | 134.80 | 0.591 | -1.833 |
| 3536 | HTS | 1912 | 0.0001068988 | 125.63 | 0.551 | -1.567 |
| 3537 | HTT | 1307 | 0.0000730736 | 134.33 | 0.589 | -1.533 |
| 3538 | HTW | 283  | 0.0000158224 | 169.90 | 0.745 | -1.600 |
| 3539 | HTY | 765  | 0.0000427707 | 159.50 | 0.699 | -1.733 |
| 3540 | HTV | 1773 | 0.0000991274 | 140.17 | 0.614 | 0.100  |
| 3541 | HWA | 540  | 0.0000301911 | 159.40 | 0.699 | -0.767 |
| 3542 | HWR | 459  | 0.0000256624 | 194.07 | 0.850 | -2.867 |
| 3543 | HWN | 256  | 0.0000143128 | 170.97 | 0.749 | -2.533 |
| 3544 | HWD | 306  | 0.0000171083 | 168.50 | 0.738 | -2.533 |
| 3545 | HWC | 149  | 0.0000083305 | 163.83 | 0.718 | -0.533 |
| 3546 | HWQ | 315  | 0.0000176115 | 179.20 | 0.785 | -2.533 |
| 3547 | HWE | 371  | 0.0000207424 | 176.80 | 0.775 | -2.533 |
| 3548 | HWG | 370  | 0.0000206865 | 151.03 | 0.662 | -1.500 |
| 3549 | HWH | 205  | 0.0000114614 | 182.73 | 0.801 | -2.433 |
| 3550 | HWI | 276  | 0.0000154310 | 184.03 | 0.806 | 0.133  |
| 3551 | HWL | 677  | 0.0000378507 | 184.07 | 0.807 | -0.100 |
| 3552 | HWK | 451  | 0.0000252151 | 185.17 | 0.811 | -2.667 |
| 3553 | HWM | 115  | 0.0000064296 | 185.07 | 0.811 | -0.733 |
| 3554 | HWF | 196  | 0.0000109582 | 193.37 | 0.847 | -0.433 |
| 3555 | HWP | 375  | 0.0000209660 | 170.37 | 0.747 | -1.900 |
| 3556 | HWS | 503  | 0.0000281224 | 161.20 | 0.706 | -1.633 |
| 3557 | HWT | 304  | 0.0000169965 | 169.90 | 0.745 | -1.600 |
| 3558 | HWW | 84   | 0.0000046964 | 205.47 | 0.900 | -1.667 |
| 3559 | HWY | 190  | 0.0000106228 | 195.07 | 0.855 | -1.800 |
| 3560 | HWV | 414  | 0.0000231465 | 175.73 | 0.770 | 0.033  |
| 3561 | HYA | 834  | 0.0000466284 | 149.00 | 0.653 | -0.900 |
| 3562 | HYR | 864  | 0.0000483057 | 183.67 | 0.805 | -3.000 |
| 3563 | HYN | 575  | 0.0000321479 | 160.57 | 0.704 | -2.667 |
| 3564 | HYD | 664  | 0.0000371238 | 158.10 | 0.693 | -2.667 |
| 3565 | HYC | 360  | 0.0000201274 | 153.43 | 0.672 | -0.667 |
| 3566 | HYQ | 670  | 0.0000374593 | 168.80 | 0.740 | -2.667 |
| 3567 | HYE | 784  | 0.0000438330 | 166.40 | 0.729 | -2.667 |
| 3568 | HYG | 795  | 0.0000444480 | 140.63 | 0.616 | -1.633 |
| 3569 | HYH | 390  | 0.0000218047 | 172.33 | 0.755 | -2.567 |
| 3570 | HYI | 707  | 0.0000395279 | 173.63 | 0.761 | 0.000  |
| 3571 | HYL | 1390 | 0.0000777141 | 173.67 | 0.761 | -0.233 |
| 3572 | HYK | 719  | 0.0000401989 | 174.77 | 0.766 | -2.800 |
| 3573 | HYM | 282  | 0.0000157665 | 174.67 | 0.765 | -0.867 |
| 3574 | HYF | 679  | 0.0000379625 | 182.97 | 0.802 | -0.567 |
| 3575 | HYP | 774  | 0.0000432739 | 159.97 | 0.701 | -2.033 |
| 3576 | HYS | 1087 | 0.0000607735 | 150.80 | 0.661 | -1.767 |
| 3577 | HYT | 725  | 0.0000405343 | 159.50 | 0.699 | -1.733 |
| 3578 | HYW | 274  | 0.0000153192 | 195.07 | 0.855 | -1.800 |
| 3579 | HYY | 500  | 0.0000279547 | 184.67 | 0.809 | -1.933 |
| 3580 | HYV | 763  | 0.0000426589 | 165.33 | 0.725 | -0.100 |
| 3581 | HVA | 2051 | 0.0001146702 | 129.67 | 0.568 | 0.933  |
| 3582 | HVR | 1497 | 0.0000836964 | 164.33 | 0.720 | -1.167 |

|      |     |      |              |        |       |        |
|------|-----|------|--------------|--------|-------|--------|
| 3583 | HVN | 922  | 0.0000515485 | 141.23 | 0.619 | -0.833 |
| 3584 | HVD | 1318 | 0.0000736886 | 138.77 | 0.608 | -0.833 |
| 3585 | HVC | 677  | 0.0000378507 | 134.10 | 0.588 | 1.167  |
| 3586 | HVQ | 1283 | 0.0000717318 | 149.47 | 0.655 | -0.833 |
| 3587 | HVE | 1690 | 0.0000944869 | 147.07 | 0.644 | -0.833 |
| 3588 | HVG | 1492 | 0.0000834168 | 121.30 | 0.532 | 0.200  |
| 3589 | HVH | 783  | 0.0000437771 | 153.00 | 0.670 | -0.733 |
| 3590 | HVI | 1337 | 0.0000747509 | 154.30 | 0.676 | 1.833  |
| 3591 | HVL | 2601 | 0.0001454203 | 154.33 | 0.676 | 1.600  |
| 3592 | HVK | 1404 | 0.0000784968 | 155.43 | 0.681 | -0.967 |
| 3593 | HVM | 458  | 0.0000256065 | 155.33 | 0.681 | 0.967  |
| 3594 | HVF | 1113 | 0.0000622272 | 163.63 | 0.717 | 1.267  |
| 3595 | HVP | 1648 | 0.0000921387 | 140.63 | 0.616 | -0.200 |
| 3596 | HVS | 1969 | 0.0001100856 | 131.47 | 0.576 | 0.067  |
| 3597 | HVT | 1495 | 0.0000835845 | 140.17 | 0.614 | 0.100  |
| 3598 | HVW | 309  | 0.0000172760 | 175.73 | 0.770 | 0.033  |
| 3599 | HVY | 838  | 0.0000468521 | 165.33 | 0.725 | -0.100 |
| 3600 | HVV | 1926 | 0.0001076815 | 146.00 | 0.640 | 1.733  |
| 3601 | IAA | 3640 | 0.0002035102 | 114.63 | 0.502 | 2.700  |
| 3602 | IAR | 2244 | 0.0001254607 | 149.30 | 0.654 | 0.600  |
| 3603 | IAN | 1817 | 0.0001015874 | 126.20 | 0.553 | 0.933  |
| 3604 | IAD | 2222 | 0.0001242307 | 123.73 | 0.542 | 0.933  |
| 3605 | IAC | 829  | 0.0000463489 | 119.07 | 0.522 | 2.933  |
| 3606 | IAQ | 2038 | 0.0001139434 | 134.43 | 0.589 | 0.933  |
| 3607 | IAE | 3187 | 0.0001781833 | 132.03 | 0.579 | 0.933  |
| 3608 | IAG | 2741 | 0.0001532477 | 106.27 | 0.466 | 1.967  |
| 3609 | IAH | 1106 | 0.0000618358 | 137.97 | 0.605 | 1.033  |
| 3610 | IAI | 2031 | 0.0001135520 | 139.27 | 0.610 | 3.600  |
| 3611 | IAL | 3968 | 0.0002218485 | 139.30 | 0.610 | 3.367  |
| 3612 | IAK | 2625 | 0.0001467622 | 140.40 | 0.615 | 0.800  |
| 3613 | IAM | 1073 | 0.0000599908 | 140.30 | 0.615 | 2.733  |
| 3614 | IAF | 1580 | 0.0000883368 | 148.60 | 0.651 | 3.033  |
| 3615 | IAP | 2012 | 0.0001124897 | 125.60 | 0.550 | 1.567  |
| 3616 | IAS | 3428 | 0.0001916574 | 116.43 | 0.510 | 1.833  |
| 3617 | IAT | 2771 | 0.0001549249 | 125.13 | 0.548 | 1.867  |
| 3618 | IAW | 478  | 0.0000267247 | 160.70 | 0.704 | 1.800  |
| 3619 | IAY | 1185 | 0.0000662526 | 150.30 | 0.659 | 1.667  |
| 3620 | IAV | 3126 | 0.0001747728 | 130.97 | 0.574 | 3.500  |
| 3621 | IRA | 2595 | 0.0001450849 | 149.30 | 0.654 | 0.600  |
| 3622 | IRR | 2787 | 0.0001558195 | 183.97 | 0.806 | -1.500 |
| 3623 | IRN | 2068 | 0.0001156206 | 160.87 | 0.705 | -1.167 |
| 3624 | IRD | 2368 | 0.0001323935 | 158.40 | 0.694 | -1.167 |
| 3625 | IRC | 820  | 0.0000458457 | 153.73 | 0.674 | 0.833  |
| 3626 | IRQ | 2017 | 0.0001127693 | 169.10 | 0.741 | -1.167 |
| 3627 | IRE | 3235 | 0.0001808669 | 166.70 | 0.730 | -1.167 |
| 3628 | IRG | 2358 | 0.0001318344 | 140.93 | 0.618 | -0.133 |
| 3629 | IRH | 1466 | 0.0000819632 | 172.63 | 0.757 | -1.067 |
| 3630 | IRI | 1929 | 0.0001078492 | 173.93 | 0.762 | 1.500  |
| 3631 | IRL | 3107 | 0.0001737105 | 173.97 | 0.762 | 1.267  |
| 3632 | IRK | 3055 | 0.0001708032 | 175.07 | 0.767 | -1.300 |
| 3633 | IRM | 797  | 0.0000445598 | 174.97 | 0.767 | 0.633  |
| 3634 | IRF | 1151 | 0.0000643517 | 183.27 | 0.803 | 0.933  |

|      |     |      |              |        |       |        |
|------|-----|------|--------------|--------|-------|--------|
| 3635 | IRP | 1859 | 0.0001039356 | 160.27 | 0.702 | -0.533 |
| 3636 | IRS | 3018 | 0.0001687346 | 151.10 | 0.662 | -0.267 |
| 3637 | IRT | 2249 | 0.0001257402 | 159.80 | 0.700 | -0.233 |
| 3638 | IRW | 493  | 0.0000275633 | 195.37 | 0.856 | -0.300 |
| 3639 | IRY | 1093 | 0.0000611090 | 184.97 | 0.811 | -0.433 |
| 3640 | IRV | 2389 | 0.0001335676 | 165.63 | 0.726 | 1.400  |
| 3641 | INA | 1842 | 0.0001029851 | 126.20 | 0.553 | 0.933  |
| 3642 | INR | 1535 | 0.0000858209 | 160.87 | 0.705 | -1.167 |
| 3643 | INN | 1517 | 0.0000848146 | 137.77 | 0.604 | -0.833 |
| 3644 | IND | 1436 | 0.0000802859 | 135.30 | 0.593 | -0.833 |
| 3645 | INC | 629  | 0.0000351670 | 130.63 | 0.572 | 1.167  |
| 3646 | INQ | 1377 | 0.0000769872 | 146.00 | 0.640 | -0.833 |
| 3647 | INE | 2221 | 0.0001241748 | 143.60 | 0.629 | -0.833 |
| 3648 | ING | 2058 | 0.0001150615 | 117.83 | 0.516 | 0.200  |
| 3649 | INH | 934  | 0.0000522194 | 149.53 | 0.655 | -0.733 |
| 3650 | INI | 1576 | 0.0000881132 | 150.83 | 0.661 | 1.833  |
| 3651 | INL | 2709 | 0.0001514586 | 150.87 | 0.661 | 1.600  |
| 3652 | INK | 2133 | 0.0001192547 | 151.97 | 0.666 | -0.967 |
| 3653 | INM | 668  | 0.0000373475 | 151.87 | 0.665 | 0.967  |
| 3654 | INF | 1166 | 0.0000651904 | 160.17 | 0.702 | 1.267  |
| 3655 | INP | 1636 | 0.0000914678 | 137.17 | 0.601 | -0.200 |
| 3656 | INS | 2469 | 0.0001380403 | 128.00 | 0.561 | 0.067  |
| 3657 | INT | 1713 | 0.0000957728 | 136.70 | 0.599 | 0.100  |
| 3658 | INW | 315  | 0.0000176115 | 172.27 | 0.755 | 0.033  |
| 3659 | INY | 930  | 0.0000519957 | 161.87 | 0.709 | -0.100 |
| 3660 | INV | 1606 | 0.0000897905 | 142.53 | 0.625 | 1.733  |
| 3661 | IDA | 1914 | 0.0001070106 | 123.73 | 0.542 | 0.933  |
| 3662 | IDR | 1846 | 0.0001032088 | 158.40 | 0.694 | -1.167 |
| 3663 | IDN | 1352 | 0.0000755895 | 135.30 | 0.593 | -0.833 |
| 3664 | IDD | 1845 | 0.0001031528 | 132.83 | 0.582 | -0.833 |
| 3665 | IDC | 662  | 0.0000370120 | 128.17 | 0.562 | 1.167  |
| 3666 | IDQ | 1430 | 0.0000799504 | 143.53 | 0.629 | -0.833 |
| 3667 | IDE | 2370 | 0.0001325053 | 141.13 | 0.618 | -0.833 |
| 3668 | IDG | 2049 | 0.0001145584 | 115.37 | 0.506 | 0.200  |
| 3669 | IDH | 924  | 0.0000516603 | 147.07 | 0.644 | -0.733 |
| 3670 | IDI | 1869 | 0.0001044947 | 148.37 | 0.650 | 1.833  |
| 3671 | IDL | 3055 | 0.0001708032 | 148.40 | 0.650 | 1.600  |
| 3672 | IDK | 1887 | 0.0001055010 | 149.50 | 0.655 | -0.967 |
| 3673 | IDM | 729  | 0.0000407580 | 149.40 | 0.655 | 0.967  |
| 3674 | IDF | 1480 | 0.0000827459 | 157.70 | 0.691 | 1.267  |
| 3675 | IDP | 1980 | 0.0001107006 | 134.70 | 0.590 | -0.200 |
| 3676 | IDS | 2580 | 0.0001442463 | 125.53 | 0.550 | 0.067  |
| 3677 | IDT | 1587 | 0.0000887282 | 134.23 | 0.588 | 0.100  |
| 3678 | IDW | 467  | 0.0000261097 | 169.80 | 0.744 | 0.033  |
| 3679 | IDY | 994  | 0.0000555739 | 159.40 | 0.699 | -0.100 |
| 3680 | IDV | 1944 | 0.0001086879 | 140.07 | 0.614 | 1.733  |
| 3681 | ICA | 1059 | 0.0000592081 | 119.07 | 0.522 | 2.933  |
| 3682 | ICR | 1169 | 0.0000653581 | 153.73 | 0.674 | 0.833  |
| 3683 | ICN | 883  | 0.0000493680 | 130.63 | 0.572 | 1.167  |
| 3684 | ICD | 921  | 0.0000514926 | 128.17 | 0.562 | 1.167  |
| 3685 | ICC | 592  | 0.0000330984 | 123.50 | 0.541 | 3.167  |
| 3686 | ICQ | 969  | 0.0000541762 | 138.87 | 0.609 | 1.167  |

|      |     |      |              |        |       |        |
|------|-----|------|--------------|--------|-------|--------|
| 3687 | ICE | 1162 | 0.0000649667 | 136.47 | 0.598 | 1.167  |
| 3688 | ICG | 1287 | 0.0000719554 | 110.70 | 0.485 | 2.200  |
| 3689 | ICH | 692  | 0.0000386893 | 142.40 | 0.624 | 1.267  |
| 3690 | ICI | 930  | 0.0000519957 | 143.70 | 0.630 | 3.833  |
| 3691 | ICL | 1874 | 0.0001047742 | 143.73 | 0.630 | 3.600  |
| 3692 | ICK | 1355 | 0.0000757572 | 144.83 | 0.635 | 1.033  |
| 3693 | ICM | 429  | 0.0000239851 | 144.73 | 0.634 | 2.967  |
| 3694 | ICF | 748  | 0.0000418202 | 153.03 | 0.671 | 3.267  |
| 3695 | ICP | 858  | 0.0000479703 | 130.03 | 0.570 | 1.800  |
| 3696 | ICS | 1838 | 0.0001027615 | 120.87 | 0.530 | 2.067  |
| 3697 | ICT | 1160 | 0.0000648549 | 129.57 | 0.568 | 2.100  |
| 3698 | ICW | 232  | 0.0000129710 | 165.13 | 0.724 | 2.033  |
| 3699 | ICY | 506  | 0.0000282902 | 154.73 | 0.678 | 1.900  |
| 3700 | ICV | 1167 | 0.0000652463 | 135.40 | 0.593 | 3.733  |
| 3701 | IQA | 2926 | 0.0001635909 | 134.43 | 0.589 | 0.933  |
| 3702 | IQR | 2335 | 0.0001305484 | 169.10 | 0.741 | -1.167 |
| 3703 | IQN | 1945 | 0.0001087438 | 146.00 | 0.640 | -0.833 |
| 3704 | IQD | 2117 | 0.0001183602 | 143.53 | 0.629 | -0.833 |
| 3705 | IQC | 714  | 0.0000399193 | 138.87 | 0.609 | 1.167  |
| 3706 | IQQ | 2353 | 0.0001315548 | 154.23 | 0.676 | -0.833 |
| 3707 | IQE | 3597 | 0.0002011061 | 151.83 | 0.665 | -0.833 |
| 3708 | IQG | 2204 | 0.0001232243 | 126.07 | 0.552 | 0.200  |
| 3709 | IQH | 1355 | 0.0000757572 | 157.77 | 0.691 | -0.733 |
| 3710 | IQI | 1498 | 0.0000837523 | 159.07 | 0.697 | 1.833  |
| 3711 | IQL | 3023 | 0.0001690141 | 159.10 | 0.697 | 1.600  |
| 3712 | IQK | 2862 | 0.0001600127 | 160.20 | 0.702 | -0.967 |
| 3713 | IQM | 913  | 0.0000510453 | 160.10 | 0.702 | 0.967  |
| 3714 | IQF | 1053 | 0.0000588726 | 168.40 | 0.738 | 1.267  |
| 3715 | IQP | 1823 | 0.0001019228 | 145.40 | 0.637 | -0.200 |
| 3716 | IQS | 2639 | 0.0001475449 | 136.23 | 0.597 | 0.067  |
| 3717 | IQT | 2014 | 0.0001126015 | 144.93 | 0.635 | 0.100  |
| 3718 | IQW | 494  | 0.0000276192 | 180.50 | 0.791 | 0.033  |
| 3719 | IQY | 919  | 0.0000513807 | 170.10 | 0.745 | -0.100 |
| 3720 | IQV | 2332 | 0.0001303807 | 150.77 | 0.661 | 1.733  |
| 3721 | IEA | 3022 | 0.0001689582 | 132.03 | 0.579 | 0.933  |
| 3722 | IER | 2604 | 0.0001455881 | 166.70 | 0.730 | -1.167 |
| 3723 | IEN | 2390 | 0.0001336235 | 143.60 | 0.629 | -0.833 |
| 3724 | IED | 3082 | 0.0001723128 | 141.13 | 0.618 | -0.833 |
| 3725 | IEC | 828  | 0.0000462930 | 136.47 | 0.598 | 1.167  |
| 3726 | IEQ | 1892 | 0.0001057806 | 151.83 | 0.665 | -0.833 |
| 3727 | IEE | 4559 | 0.0002548910 | 149.43 | 0.655 | -0.833 |
| 3728 | IEG | 2442 | 0.0001365308 | 123.67 | 0.542 | 0.200  |
| 3729 | IEH | 1015 | 0.0000567480 | 155.37 | 0.681 | -0.733 |
| 3730 | IEI | 2007 | 0.0001122102 | 156.67 | 0.687 | 1.833  |
| 3731 | IEL | 2801 | 0.0001566022 | 156.70 | 0.687 | 1.600  |
| 3732 | IEK | 3676 | 0.0002055230 | 157.80 | 0.691 | -0.967 |
| 3733 | IEM | 951  | 0.0000531698 | 157.70 | 0.691 | 0.967  |
| 3734 | IEF | 1270 | 0.0000710049 | 166.00 | 0.727 | 1.267  |
| 3735 | IEP | 1490 | 0.0000833050 | 143.00 | 0.627 | -0.200 |
| 3736 | IES | 2623 | 0.0001466504 | 133.83 | 0.586 | 0.067  |
| 3737 | IET | 2138 | 0.0001195343 | 142.53 | 0.625 | 0.100  |
| 3738 | IEW | 444  | 0.0000248238 | 178.10 | 0.780 | 0.033  |



|      |     |      |              |        |       |        |
|------|-----|------|--------------|--------|-------|--------|
| 3739 | IEY | 1012 | 0.0000565803 | 167.70 | 0.735 | -0.100 |
| 3740 | IEV | 2479 | 0.0001385994 | 148.37 | 0.650 | 1.733  |
| 3741 | IGA | 2329 | 0.0001302130 | 106.27 | 0.466 | 1.967  |
| 3742 | IGR | 2100 | 0.0001174097 | 140.93 | 0.618 | -0.133 |
| 3743 | IGN | 1745 | 0.0000975619 | 117.83 | 0.516 | 0.200  |
| 3744 | IGD | 2083 | 0.0001164593 | 115.37 | 0.506 | 0.200  |
| 3745 | IGC | 767  | 0.0000428825 | 110.70 | 0.485 | 2.200  |
| 3746 | IGQ | 1533 | 0.0000857091 | 126.07 | 0.552 | 0.200  |
| 3747 | IGE | 2438 | 0.0001363071 | 123.67 | 0.542 | 0.200  |
| 3748 | IGG | 2691 | 0.0001504522 | 97.90  | 0.429 | 1.233  |
| 3749 | IGH | 993  | 0.0000555180 | 129.60 | 0.568 | 0.300  |
| 3750 | IGI | 1945 | 0.0001087438 | 130.90 | 0.574 | 2.867  |
| 3751 | IGL | 3369 | 0.0001883588 | 130.93 | 0.574 | 2.633  |
| 3752 | IGK | 2188 | 0.0001223298 | 132.03 | 0.579 | 0.067  |
| 3753 | IGM | 819  | 0.0000457898 | 131.93 | 0.578 | 2.000  |
| 3754 | IGF | 1568 | 0.0000876659 | 140.23 | 0.615 | 2.300  |
| 3755 | IGP | 1890 | 0.0001056688 | 117.23 | 0.514 | 0.833  |
| 3756 | IGS | 2843 | 0.0001589504 | 108.07 | 0.474 | 1.100  |
| 3757 | IGT | 1920 | 0.0001073460 | 116.77 | 0.512 | 1.133  |
| 3758 | IGW | 526  | 0.0000294083 | 152.33 | 0.668 | 1.067  |
| 3759 | IGY | 1179 | 0.0000659172 | 141.93 | 0.622 | 0.933  |
| 3760 | IGV | 2426 | 0.0001356362 | 122.60 | 0.537 | 2.767  |
| 3761 | IHA | 1247 | 0.0000697190 | 137.97 | 0.605 | 1.033  |
| 3762 | IHR | 1516 | 0.0000847586 | 172.63 | 0.757 | -1.067 |
| 3763 | IHN | 952  | 0.0000532257 | 149.53 | 0.655 | -0.733 |
| 3764 | IHD | 909  | 0.0000508216 | 147.07 | 0.644 | -0.733 |
| 3765 | IHC | 609  | 0.0000340488 | 142.40 | 0.624 | 1.267  |
| 3766 | IHQ | 1383 | 0.0000773227 | 157.77 | 0.691 | -0.733 |
| 3767 | IHE | 1296 | 0.0000724586 | 155.37 | 0.681 | -0.733 |
| 3768 | IHG | 1320 | 0.0000738004 | 129.60 | 0.568 | 0.300  |
| 3769 | IHH | 833  | 0.0000465725 | 161.30 | 0.707 | -0.633 |
| 3770 | IHI | 1291 | 0.0000721790 | 162.60 | 0.713 | 1.933  |
| 3771 | IHL | 2033 | 0.0001136638 | 162.63 | 0.713 | 1.700  |
| 3772 | IHK | 1212 | 0.0000677622 | 163.73 | 0.717 | -0.867 |
| 3773 | IHM | 552  | 0.0000308620 | 163.63 | 0.717 | 1.067  |
| 3774 | IHF | 910  | 0.0000508776 | 171.93 | 0.753 | 1.367  |
| 3775 | IHP | 1381 | 0.0000772109 | 148.93 | 0.653 | -0.100 |
| 3776 | IHS | 2229 | 0.0001246220 | 139.77 | 0.612 | 0.167  |
| 3777 | IHT | 4691 | 0.0002622710 | 148.47 | 0.651 | 0.200  |
| 3778 | IHW | 269  | 0.0000150396 | 184.03 | 0.806 | 0.133  |
| 3779 | IHY | 581  | 0.0000324834 | 173.63 | 0.761 | 0.000  |
| 3780 | IHV | 1280 | 0.0000715640 | 154.30 | 0.676 | 1.833  |
| 3781 | IIA | 2365 | 0.0001322257 | 139.27 | 0.610 | 3.600  |
| 3782 | IIR | 1956 | 0.0001093588 | 173.93 | 0.762 | 1.500  |
| 3783 | IIN | 1923 | 0.0001075138 | 150.83 | 0.661 | 1.833  |
| 3784 | IID | 2097 | 0.0001172420 | 148.37 | 0.650 | 1.833  |
| 3785 | IIC | 850  | 0.0000475230 | 143.70 | 0.630 | 3.833  |
| 3786 | IIQ | 1894 | 0.0001058924 | 159.07 | 0.697 | 1.833  |
| 3787 | IIE | 2274 | 0.0001271380 | 156.67 | 0.687 | 1.833  |
| 3788 | IIG | 2251 | 0.0001258521 | 130.90 | 0.574 | 2.867  |
| 3789 | IIH | 1945 | 0.0001087438 | 162.60 | 0.713 | 1.933  |
| 3790 | III | 2119 | 0.0001184720 | 163.90 | 0.718 | 4.500  |

|      |     |      |              |        |       |        |
|------|-----|------|--------------|--------|-------|--------|
| 3791 | IIL | 3696 | 0.0002066411 | 163.93 | 0.718 | 4.267  |
| 3792 | IIK | 2403 | 0.0001343503 | 165.03 | 0.723 | 1.700  |
| 3793 | IIM | 771  | 0.0000431061 | 164.93 | 0.723 | 3.633  |
| 3794 | IIF | 1839 | 0.0001028174 | 173.23 | 0.759 | 3.933  |
| 3795 | IIP | 2182 | 0.0001219943 | 150.23 | 0.658 | 2.467  |
| 3796 | IIS | 3481 | 0.0001946206 | 141.07 | 0.618 | 2.733  |
| 3797 | IIT | 2423 | 0.0001354685 | 149.77 | 0.656 | 2.767  |
| 3798 | IIW | 409  | 0.0000228669 | 185.33 | 0.812 | 2.700  |
| 3799 | IIY | 1315 | 0.0000735209 | 174.93 | 0.767 | 2.567  |
| 3800 | IIV | 2155 | 0.0001204848 | 155.60 | 0.682 | 4.400  |
| 3801 | ILA | 5560 | 0.0003108563 | 139.30 | 0.610 | 3.367  |
| 3802 | ILR | 4475 | 0.0002501946 | 173.97 | 0.762 | 1.267  |
| 3803 | ILN | 3404 | 0.0001903156 | 150.87 | 0.661 | 1.600  |
| 3804 | ILD | 4243 | 0.0002372236 | 148.40 | 0.650 | 1.600  |
| 3805 | ILC | 1627 | 0.0000909646 | 143.73 | 0.630 | 3.600  |
| 3806 | ILQ | 4482 | 0.0002505859 | 159.10 | 0.697 | 1.600  |
| 3807 | ILE | 5681 | 0.0003176213 | 156.70 | 0.687 | 1.600  |
| 3808 | ILG | 5027 | 0.0002810566 | 130.93 | 0.574 | 2.633  |
| 3809 | ILH | 2243 | 0.0001254048 | 162.63 | 0.713 | 1.700  |
| 3810 | ILI | 3319 | 0.0001855633 | 163.93 | 0.718 | 4.267  |
| 3811 | ILL | 7470 | 0.0004176432 | 163.97 | 0.719 | 4.033  |
| 3812 | ILK | 5074 | 0.0002836843 | 165.07 | 0.723 | 1.467  |
| 3813 | ILM | 1371 | 0.0000766518 | 164.97 | 0.723 | 3.400  |
| 3814 | ILF | 2888 | 0.0001614663 | 173.27 | 0.759 | 3.700  |
| 3815 | ILP | 3825 | 0.0002138535 | 150.27 | 0.658 | 2.233  |
| 3816 | ILS | 6236 | 0.0003486510 | 141.10 | 0.618 | 2.500  |
| 3817 | ILT | 4604 | 0.0002574069 | 149.80 | 0.656 | 2.533  |
| 3818 | ILW | 789  | 0.0000441125 | 185.37 | 0.812 | 2.467  |
| 3819 | ILY | 2069 | 0.0001156766 | 174.97 | 0.767 | 2.333  |
| 3820 | ILV | 4364 | 0.0002439886 | 155.63 | 0.682 | 4.167  |
| 3821 | IKA | 2989 | 0.0001671132 | 140.40 | 0.615 | 0.800  |
| 3822 | IKR | 2241 | 0.0001252930 | 175.07 | 0.767 | -1.300 |
| 3823 | IKN | 2179 | 0.0001218266 | 151.97 | 0.666 | -0.967 |
| 3824 | IKD | 2656 | 0.0001484954 | 149.50 | 0.655 | -0.967 |
| 3825 | IKC | 787  | 0.0000440007 | 144.83 | 0.635 | 1.033  |
| 3826 | IKQ | 2098 | 0.0001172979 | 160.20 | 0.702 | -0.967 |
| 3827 | IKE | 4167 | 0.0002329745 | 157.80 | 0.691 | -0.967 |
| 3828 | IKG | 2324 | 0.0001299334 | 132.03 | 0.579 | 0.067  |
| 3829 | IKH | 1290 | 0.0000721231 | 163.73 | 0.717 | -0.867 |
| 3830 | IKI | 2156 | 0.0001205407 | 165.03 | 0.723 | 1.700  |
| 3831 | IKL | 3125 | 0.0001747169 | 165.07 | 0.723 | 1.467  |
| 3832 | IKK | 3640 | 0.0002035102 | 166.17 | 0.728 | -1.100 |
| 3833 | IKM | 866  | 0.0000484175 | 166.07 | 0.728 | 0.833  |
| 3834 | IKF | 1269 | 0.0000709490 | 174.37 | 0.764 | 1.133  |
| 3835 | IKP | 2104 | 0.0001176334 | 151.37 | 0.663 | -0.333 |
| 3836 | IKS | 3038 | 0.0001698528 | 142.20 | 0.623 | -0.067 |
| 3837 | IKT | 2394 | 0.0001338471 | 150.90 | 0.661 | -0.033 |
| 3838 | IKW | 534  | 0.0000298556 | 186.47 | 0.817 | -0.100 |
| 3839 | IKY | 1113 | 0.0000622272 | 176.07 | 0.772 | -0.233 |
| 3840 | IKV | 2655 | 0.0001484395 | 156.73 | 0.687 | 1.600  |
| 3841 | IMA | 1247 | 0.0000697190 | 140.30 | 0.615 | 2.733  |
| 3842 | IMR | 777  | 0.0000434416 | 174.97 | 0.767 | 0.633  |

|      |     |      |              |        |       |        |
|------|-----|------|--------------|--------|-------|--------|
| 3843 | IMN | 795  | 0.0000444480 | 151.87 | 0.665 | 0.967  |
| 3844 | IMD | 967  | 0.0000540644 | 149.40 | 0.655 | 0.967  |
| 3845 | IMC | 330  | 0.0000184501 | 144.73 | 0.634 | 2.967  |
| 3846 | IMQ | 702  | 0.0000392484 | 160.10 | 0.702 | 0.967  |
| 3847 | IME | 1354 | 0.0000757013 | 157.70 | 0.691 | 0.967  |
| 3848 | IMG | 1011 | 0.0000565244 | 131.93 | 0.578 | 2.000  |
| 3849 | IMH | 428  | 0.0000239292 | 163.63 | 0.717 | 1.067  |
| 3850 | IMI | 554  | 0.0000309738 | 164.93 | 0.723 | 3.633  |
| 3851 | IML | 1192 | 0.0000666440 | 164.97 | 0.723 | 3.400  |
| 3852 | IMK | 1197 | 0.0000669236 | 166.07 | 0.728 | 0.833  |
| 3853 | IMM | 316  | 0.0000176674 | 165.97 | 0.727 | 2.767  |
| 3854 | IMF | 473  | 0.0000264451 | 174.27 | 0.764 | 3.067  |
| 3855 | IMP | 615  | 0.0000343843 | 151.27 | 0.663 | 1.600  |
| 3856 | IMS | 1064 | 0.0000594876 | 142.10 | 0.623 | 1.867  |
| 3857 | IMT | 918  | 0.0000513248 | 150.80 | 0.661 | 1.900  |
| 3858 | IMW | 144  | 0.0000080510 | 186.37 | 0.817 | 1.833  |
| 3859 | IMY | 435  | 0.0000243206 | 175.97 | 0.771 | 1.700  |
| 3860 | IMV | 948  | 0.0000530021 | 156.63 | 0.686 | 3.533  |
| 3861 | IFA | 1848 | 0.0001033206 | 148.60 | 0.651 | 3.033  |
| 3862 | IFR | 1639 | 0.0000916355 | 183.27 | 0.803 | 0.933  |
| 3863 | IFN | 1378 | 0.0000770432 | 160.17 | 0.702 | 1.267  |
| 3864 | IFD | 1438 | 0.0000803977 | 157.70 | 0.691 | 1.267  |
| 3865 | IFC | 801  | 0.0000447834 | 153.03 | 0.671 | 3.267  |
| 3866 | IFQ | 1697 | 0.0000948783 | 168.40 | 0.738 | 1.267  |
| 3867 | IFE | 1642 | 0.0000918032 | 166.00 | 0.727 | 1.267  |
| 3868 | IFG | 2116 | 0.0001183043 | 140.23 | 0.615 | 2.300  |
| 3869 | IFH | 926  | 0.0000517721 | 171.93 | 0.753 | 1.367  |
| 3870 | IFI | 1854 | 0.0001036560 | 173.23 | 0.759 | 3.933  |
| 3871 | IFL | 3469 | 0.0001939497 | 173.27 | 0.759 | 3.700  |
| 3872 | IFK | 1620 | 0.0000905732 | 174.37 | 0.764 | 1.133  |
| 3873 | IFM | 645  | 0.0000360616 | 174.27 | 0.764 | 3.067  |
| 3874 | IFF | 1473 | 0.0000823545 | 182.57 | 0.800 | 3.367  |
| 3875 | IFP | 1627 | 0.0000909646 | 159.57 | 0.699 | 1.900  |
| 3876 | IFS | 3009 | 0.0001682314 | 150.40 | 0.659 | 2.167  |
| 3877 | IFT | 2101 | 0.0001174656 | 159.10 | 0.697 | 2.200  |
| 3878 | IFW | 420  | 0.0000234819 | 194.67 | 0.853 | 2.133  |
| 3879 | IFY | 1100 | 0.0000615003 | 184.27 | 0.807 | 2.000  |
| 3880 | IFV | 1734 | 0.0000969469 | 164.93 | 0.723 | 3.833  |
| 3881 | IPA | 3471 | 0.0001940615 | 125.60 | 0.550 | 1.567  |
| 3882 | IPR | 2298 | 0.0001284798 | 160.27 | 0.702 | -0.533 |
| 3883 | IPN | 1534 | 0.0000857650 | 137.17 | 0.601 | -0.200 |
| 3884 | IPD | 2095 | 0.0001171302 | 134.70 | 0.590 | -0.200 |
| 3885 | IPC | 823  | 0.0000460134 | 130.03 | 0.570 | 1.800  |
| 3886 | IPQ | 2167 | 0.0001211557 | 145.40 | 0.637 | -0.200 |
| 3887 | IPE | 3691 | 0.0002063616 | 143.00 | 0.627 | -0.200 |
| 3888 | IPG | 3598 | 0.0002011620 | 117.23 | 0.514 | 0.833  |
| 3889 | IPH | 1079 | 0.0000603262 | 148.93 | 0.653 | -0.100 |
| 3890 | IPI | 1851 | 0.0001034883 | 150.23 | 0.658 | 2.467  |
| 3891 | IPL | 3836 | 0.0002144685 | 150.27 | 0.658 | 2.233  |
| 3892 | IPK | 2400 | 0.0001341826 | 151.37 | 0.663 | -0.333 |
| 3893 | IPM | 828  | 0.0000462930 | 151.27 | 0.663 | 1.600  |
| 3894 | IPF | 1774 | 0.0000991833 | 159.57 | 0.699 | 1.900  |

|      |     |      |              |        |       |        |
|------|-----|------|--------------|--------|-------|--------|
| 3895 | IPP | 3444 | 0.0001925520 | 136.57 | 0.598 | 0.433  |
| 3896 | IPS | 3667 | 0.0002050198 | 127.40 | 0.558 | 0.700  |
| 3897 | IPT | 2343 | 0.0001309957 | 136.10 | 0.596 | 0.733  |
| 3898 | IPW | 453  | 0.0000253270 | 171.67 | 0.752 | 0.667  |
| 3899 | IPY | 1085 | 0.0000606617 | 161.27 | 0.707 | 0.533  |
| 3900 | IPV | 3244 | 0.0001813701 | 141.93 | 0.622 | 2.367  |
| 3901 | ISA | 3964 | 0.0002216249 | 116.43 | 0.510 | 1.833  |
| 3902 | ISR | 3613 | 0.0002020007 | 151.10 | 0.662 | -0.267 |
| 3903 | ISN | 2525 | 0.0001411712 | 128.00 | 0.561 | 0.067  |
| 3904 | ISD | 3308 | 0.0001849483 | 125.53 | 0.550 | 0.067  |
| 3905 | ISC | 1285 | 0.0000718436 | 120.87 | 0.530 | 2.067  |
| 3906 | ISQ | 3042 | 0.0001700764 | 136.23 | 0.597 | 0.067  |
| 3907 | ISE | 4369 | 0.0002442682 | 133.83 | 0.586 | 0.067  |
| 3908 | ISG | 3935 | 0.0002200035 | 108.07 | 0.474 | 1.100  |
| 3909 | ISH | 1774 | 0.0000991833 | 139.77 | 0.612 | 0.167  |
| 3910 | ISI | 2897 | 0.0001619695 | 141.07 | 0.618 | 2.733  |
| 3911 | ISL | 5663 | 0.0003166149 | 141.10 | 0.618 | 2.500  |
| 3912 | ISK | 3760 | 0.0002102193 | 142.20 | 0.623 | -0.067 |
| 3913 | ISM | 1156 | 0.0000646313 | 142.10 | 0.623 | 1.867  |
| 3914 | ISF | 2570 | 0.0001436872 | 150.40 | 0.659 | 2.167  |
| 3915 | ISP | 3639 | 0.0002034543 | 127.40 | 0.558 | 0.700  |
| 3916 | ISS | 6574 | 0.0003675484 | 118.23 | 0.518 | 0.967  |
| 3917 | IST | 3356 | 0.0001876319 | 126.93 | 0.556 | 1.000  |
| 3918 | ISW | 878  | 0.0000490885 | 162.50 | 0.712 | 0.933  |
| 3919 | ISY | 1813 | 0.0001013637 | 152.10 | 0.667 | 0.800  |
| 3920 | ISV | 3734 | 0.0002087657 | 132.77 | 0.582 | 2.633  |
| 3921 | ITA | 3143 | 0.0001757232 | 125.13 | 0.548 | 1.867  |
| 3922 | ITR | 1955 | 0.0001093029 | 159.80 | 0.700 | -0.233 |
| 3923 | ITN | 1856 | 0.0001037678 | 136.70 | 0.599 | 0.100  |
| 3924 | ITD | 2327 | 0.0001301012 | 134.23 | 0.588 | 0.100  |
| 3925 | ITC | 1052 | 0.0000588167 | 129.57 | 0.568 | 2.100  |
| 3926 | ITQ | 1880 | 0.0001051097 | 144.93 | 0.635 | 0.100  |
| 3927 | ITE | 2813 | 0.0001572731 | 142.53 | 0.625 | 0.100  |
| 3928 | ITG | 3063 | 0.0001712505 | 116.77 | 0.512 | 1.133  |
| 3929 | ITH | 1229 | 0.0000687127 | 148.47 | 0.651 | 0.200  |
| 3930 | ITI | 2297 | 0.0001284239 | 149.77 | 0.656 | 2.767  |
| 3931 | ITL | 3877 | 0.0002167607 | 149.80 | 0.656 | 2.533  |
| 3932 | ITK | 2526 | 0.0001412271 | 150.90 | 0.661 | -0.033 |
| 3933 | ITM | 865  | 0.0000483616 | 150.80 | 0.661 | 1.900  |
| 3934 | ITF | 1805 | 0.0001009165 | 159.10 | 0.697 | 2.200  |
| 3935 | ITP | 2305 | 0.0001288712 | 136.10 | 0.596 | 0.733  |
| 3936 | ITS | 3645 | 0.0002037898 | 126.93 | 0.556 | 1.000  |
| 3937 | ITT | 2784 | 0.0001556518 | 135.63 | 0.594 | 1.033  |
| 3938 | ITW | 718  | 0.0000401429 | 171.20 | 0.750 | 0.967  |
| 3939 | ITY | 1300 | 0.0000726822 | 160.80 | 0.705 | 0.833  |
| 3940 | ITV | 3222 | 0.0001801401 | 141.47 | 0.620 | 2.667  |
| 3941 | IWA | 623  | 0.0000348316 | 160.70 | 0.704 | 1.800  |
| 3942 | IWR | 440  | 0.0000246001 | 195.37 | 0.856 | -0.300 |
| 3943 | IWN | 538  | 0.0000300793 | 172.27 | 0.755 | 0.033  |
| 3944 | IWD | 737  | 0.0000412052 | 169.80 | 0.744 | 0.033  |
| 3945 | IWC | 137  | 0.0000076596 | 165.13 | 0.724 | 2.033  |
| 3946 | IWQ | 338  | 0.0000188974 | 180.50 | 0.791 | 0.033  |

|      |     |      |              |        |       |        |
|------|-----|------|--------------|--------|-------|--------|
| 3947 | IWE | 608  | 0.0000339929 | 178.10 | 0.780 | 0.033  |
| 3948 | IWG | 531  | 0.0000296879 | 152.33 | 0.668 | 1.067  |
| 3949 | IWH | 236  | 0.0000131946 | 184.03 | 0.806 | 0.133  |
| 3950 | IWI | 382  | 0.0000213574 | 185.33 | 0.812 | 2.700  |
| 3951 | IWL | 708  | 0.0000395839 | 185.37 | 0.812 | 2.467  |
| 3952 | IWK | 640  | 0.0000357820 | 186.47 | 0.817 | -0.100 |
| 3953 | IWM | 232  | 0.0000129710 | 186.37 | 0.817 | 1.833  |
| 3954 | IWF | 396  | 0.0000221401 | 194.67 | 0.853 | 2.133  |
| 3955 | IWP | 314  | 0.0000175556 | 171.67 | 0.752 | 0.667  |
| 3956 | IWS | 807  | 0.0000451189 | 162.50 | 0.712 | 0.933  |
| 3957 | IWT | 515  | 0.0000287933 | 171.20 | 0.750 | 0.967  |
| 3958 | IWW | 128  | 0.0000071564 | 206.77 | 0.906 | 0.900  |
| 3959 | IWY | 258  | 0.0000144246 | 196.37 | 0.861 | 0.767  |
| 3960 | IWV | 472  | 0.0000263892 | 177.03 | 0.776 | 2.600  |
| 3961 | IYA | 1220 | 0.0000682095 | 150.30 | 0.659 | 1.667  |
| 3962 | IYR | 1247 | 0.0000697190 | 184.97 | 0.811 | -0.433 |
| 3963 | IYN | 1198 | 0.0000669795 | 161.87 | 0.709 | -0.100 |
| 3964 | IYD | 1277 | 0.0000713963 | 159.40 | 0.699 | -0.100 |
| 3965 | IYC | 596  | 0.0000333220 | 154.73 | 0.678 | 1.900  |
| 3966 | IYQ | 1265 | 0.0000707254 | 170.10 | 0.745 | -0.100 |
| 3967 | IYE | 1478 | 0.0000826341 | 167.70 | 0.735 | -0.100 |
| 3968 | IYG | 1420 | 0.0000793913 | 141.93 | 0.622 | 0.933  |
| 3969 | IYH | 743  | 0.0000415407 | 173.63 | 0.761 | 0.000  |
| 3970 | IYI | 1252 | 0.0000699986 | 174.93 | 0.767 | 2.567  |
| 3971 | IYL | 1920 | 0.0001073460 | 174.97 | 0.767 | 2.333  |
| 3972 | IYK | 1438 | 0.0000803977 | 176.07 | 0.772 | -0.233 |
| 3973 | IYM | 443  | 0.0000247679 | 175.97 | 0.771 | 1.700  |
| 3974 | IYF | 1181 | 0.0000660290 | 184.27 | 0.807 | 2.000  |
| 3975 | IYP | 1064 | 0.0000594876 | 161.27 | 0.707 | 0.533  |
| 3976 | IYS | 1983 | 0.0001108683 | 152.10 | 0.667 | 0.800  |
| 3977 | IYT | 1735 | 0.0000970028 | 160.80 | 0.705 | 0.833  |
| 3978 | IYW | 327  | 0.0000182824 | 196.37 | 0.861 | 0.767  |
| 3979 | IYY | 710  | 0.0000396957 | 185.97 | 0.815 | 0.633  |
| 3980 | IYV | 1575 | 0.0000880573 | 166.63 | 0.730 | 2.467  |
| 3981 | IVA | 2886 | 0.0001613545 | 130.97 | 0.574 | 3.500  |
| 3982 | IVR | 2031 | 0.0001135520 | 165.63 | 0.726 | 1.400  |
| 3983 | IVN | 1801 | 0.0001006928 | 142.53 | 0.625 | 1.733  |
| 3984 | IVD | 2338 | 0.0001307162 | 140.07 | 0.614 | 1.733  |
| 3985 | IVC | 858  | 0.0000479703 | 135.40 | 0.593 | 3.733  |
| 3986 | IVQ | 1920 | 0.0001073460 | 150.77 | 0.661 | 1.733  |
| 3987 | IVE | 3085 | 0.0001724805 | 148.37 | 0.650 | 1.733  |
| 3988 | IVG | 2862 | 0.0001600127 | 122.60 | 0.537 | 2.767  |
| 3989 | IVH | 1363 | 0.0000762045 | 154.30 | 0.676 | 1.833  |
| 3990 | IVI | 2109 | 0.0001179129 | 155.60 | 0.682 | 4.400  |
| 3991 | IVL | 3780 | 0.0002113375 | 155.63 | 0.682 | 4.167  |
| 3992 | IVK | 2390 | 0.0001336235 | 156.73 | 0.687 | 1.600  |
| 3993 | IVM | 911  | 0.0000509335 | 156.63 | 0.686 | 3.533  |
| 3994 | IVF | 1688 | 0.0000943751 | 164.93 | 0.723 | 3.833  |
| 3995 | IVP | 2101 | 0.0001174656 | 141.93 | 0.622 | 2.367  |
| 3996 | IVS | 3446 | 0.0001926638 | 132.77 | 0.582 | 2.633  |
| 3997 | IVT | 2731 | 0.0001526886 | 141.47 | 0.620 | 2.667  |
| 3998 | IVW | 383  | 0.0000214133 | 177.03 | 0.776 | 2.600  |

|      |     |       |              |        |       |        |
|------|-----|-------|--------------|--------|-------|--------|
| 3999 | IVY | 1158  | 0.0000647431 | 166.63 | 0.730 | 2.467  |
| 4000 | IVV | 2741  | 0.0001532477 | 147.30 | 0.645 | 4.300  |
| 4001 | LAA | 12435 | 0.0006952334 | 114.67 | 0.502 | 2.467  |
| 4002 | LAR | 7471  | 0.0004176991 | 149.33 | 0.654 | 0.367  |
| 4003 | LAN | 3814  | 0.0002132385 | 126.23 | 0.553 | 0.700  |
| 4004 | LAD | 5363  | 0.0002998421 | 123.77 | 0.542 | 0.700  |
| 4005 | LAC | 2671  | 0.0001493340 | 119.10 | 0.522 | 2.700  |
| 4006 | LAQ | 6550  | 0.0003662066 | 134.47 | 0.589 | 0.700  |
| 4007 | LAE | 8672  | 0.0004848463 | 132.07 | 0.579 | 0.700  |
| 4008 | LAG | 8214  | 0.0004592398 | 106.30 | 0.466 | 1.733  |
| 4009 | LAH | 2966  | 0.0001658273 | 138.00 | 0.605 | 0.800  |
| 4010 | LAI | 4350  | 0.0002432059 | 139.30 | 0.610 | 3.367  |
| 4011 | LAL | 13066 | 0.0007305122 | 139.33 | 0.611 | 3.133  |
| 4012 | LAK | 6110  | 0.0003416064 | 140.43 | 0.615 | 0.567  |
| 4013 | LAM | 2310  | 0.0001291507 | 140.33 | 0.615 | 2.500  |
| 4014 | LAF | 4137  | 0.0002312972 | 148.63 | 0.651 | 2.800  |
| 4015 | LAP | 6914  | 0.0003865576 | 125.63 | 0.551 | 1.333  |
| 4016 | LAS | 10648 | 0.0005953233 | 116.47 | 0.510 | 1.600  |
| 4017 | LAT | 6080  | 0.0003399292 | 125.17 | 0.548 | 1.633  |
| 4018 | LAW | 1680  | 0.0000939278 | 160.73 | 0.704 | 1.567  |
| 4019 | LAY | 2363  | 0.0001321139 | 150.33 | 0.659 | 1.433  |
| 4020 | LAV | 8208  | 0.0004589044 | 131.00 | 0.574 | 3.267  |
| 4021 | LRA | 8398  | 0.0004695271 | 149.33 | 0.654 | 0.367  |
| 4022 | LRR | 9030  | 0.0005048619 | 184.00 | 0.806 | -1.733 |
| 4023 | LRN | 4685  | 0.0002619356 | 160.90 | 0.705 | -1.400 |
| 4024 | LRD | 5574  | 0.0003116390 | 158.43 | 0.694 | -1.400 |
| 4025 | LRC | 2193  | 0.0001226093 | 153.77 | 0.674 | 0.600  |
| 4026 | LRQ | 5628  | 0.0003146581 | 169.13 | 0.741 | -1.400 |
| 4027 | LRE | 8530  | 0.0004769072 | 166.73 | 0.731 | -1.400 |
| 4028 | LRG | 7052  | 0.0003942731 | 140.97 | 0.618 | -0.367 |
| 4029 | LRH | 3121  | 0.0001744932 | 172.67 | 0.757 | -1.300 |
| 4030 | LRI | 3732  | 0.0002086539 | 173.97 | 0.762 | 1.267  |
| 4031 | LRL | 9923  | 0.0005547890 | 174.00 | 0.762 | 1.033  |
| 4032 | LRK | 7368  | 0.0004119404 | 175.10 | 0.767 | -1.533 |
| 4033 | LRM | 1651  | 0.0000923064 | 175.00 | 0.767 | 0.400  |
| 4034 | LRF | 3098  | 0.0001732073 | 183.30 | 0.803 | 0.700  |
| 4035 | LRP | 6354  | 0.0003552483 | 160.30 | 0.702 | -0.767 |
| 4036 | LRS | 8028  | 0.0004488407 | 151.13 | 0.662 | -0.500 |
| 4037 | LRT | 5179  | 0.0002895548 | 159.83 | 0.700 | -0.467 |
| 4038 | LRW | 1254  | 0.0000701104 | 195.40 | 0.856 | -0.533 |
| 4039 | LRY | 2399  | 0.0001341266 | 185.00 | 0.811 | -0.667 |
| 4040 | LRV | 5957  | 0.0003330523 | 165.67 | 0.726 | 1.167  |
| 4041 | LNA | 3257  | 0.0001820969 | 126.23 | 0.553 | 0.700  |
| 4042 | LNR | 3319  | 0.0001855633 | 160.90 | 0.705 | -1.400 |
| 4043 | LNN | 2552  | 0.0001426808 | 137.80 | 0.604 | -1.067 |
| 4044 | LND | 2670  | 0.0001492781 | 135.33 | 0.593 | -1.067 |
| 4045 | LNC | 1289  | 0.0000720672 | 130.67 | 0.573 | 0.933  |
| 4046 | LNQ | 2911  | 0.0001627523 | 146.03 | 0.640 | -1.067 |
| 4047 | LNE | 4131  | 0.0002309617 | 143.63 | 0.629 | -1.067 |
| 4048 | LNG | 3720  | 0.0002079830 | 117.87 | 0.517 | -0.033 |
| 4049 | LNH | 1678  | 0.0000938160 | 149.57 | 0.655 | -0.967 |
| 4050 | LNI | 3035  | 0.0001696850 | 150.87 | 0.661 | 1.600  |

|      |     |      |              |        |       |        |
|------|-----|------|--------------|--------|-------|--------|
| 4051 | LNL | 5601 | 0.0003131485 | 150.90 | 0.661 | 1.367  |
| 4052 | LNK | 3676 | 0.0002055230 | 152.00 | 0.666 | -1.200 |
| 4053 | LNM | 1278 | 0.0000714522 | 151.90 | 0.666 | 0.733  |
| 4054 | LNF | 2168 | 0.0001212116 | 160.20 | 0.702 | 1.033  |
| 4055 | LNP | 3784 | 0.0002115612 | 137.20 | 0.601 | -0.433 |
| 4056 | LNS | 5442 | 0.0003042590 | 128.03 | 0.561 | -0.167 |
| 4057 | LNT | 3135 | 0.0001752760 | 136.73 | 0.599 | -0.133 |
| 4058 | LNW | 741  | 0.0000414289 | 172.30 | 0.755 | -0.200 |
| 4059 | LVY | 1511 | 0.0000844791 | 161.90 | 0.709 | -0.333 |
| 4060 | LNV | 3528 | 0.0001972484 | 142.57 | 0.625 | 1.500  |
| 4061 | LDA | 5082 | 0.0002841316 | 123.77 | 0.542 | 0.700  |
| 4062 | LDR | 4737 | 0.0002648428 | 158.43 | 0.694 | -1.400 |
| 4063 | LDN | 2904 | 0.0001623609 | 135.33 | 0.593 | -1.067 |
| 4064 | LDD | 4207 | 0.0002352108 | 132.87 | 0.582 | -1.067 |
| 4065 | LDC | 1613 | 0.0000901819 | 128.20 | 0.562 | 0.933  |
| 4066 | LDQ | 3501 | 0.0001957388 | 143.57 | 0.629 | -1.067 |
| 4067 | LDE | 5855 | 0.0003273495 | 141.17 | 0.619 | -1.067 |
| 4068 | LDG | 5107 | 0.0002855293 | 115.40 | 0.506 | -0.033 |
| 4069 | LDH | 2122 | 0.0001186397 | 147.10 | 0.645 | -0.967 |
| 4070 | LDI | 3879 | 0.0002168726 | 148.40 | 0.650 | 1.600  |
| 4071 | LDL | 8418 | 0.0004706453 | 148.43 | 0.650 | 1.367  |
| 4072 | LDK | 4479 | 0.0002504182 | 149.53 | 0.655 | -1.200 |
| 4073 | LDM | 1710 | 0.0000956051 | 149.43 | 0.655 | 0.733  |
| 4074 | LDF | 3280 | 0.0001833828 | 157.73 | 0.691 | 1.033  |
| 4075 | LDP | 5134 | 0.0002870389 | 134.73 | 0.590 | -0.433 |
| 4076 | LDS | 7022 | 0.0003925958 | 125.57 | 0.550 | -0.167 |
| 4077 | LDT | 4308 | 0.0002408577 | 134.27 | 0.588 | -0.133 |
| 4078 | LDW | 970  | 0.0000542321 | 169.83 | 0.744 | -0.200 |
| 4079 | LDY | 2324 | 0.0001299334 | 159.43 | 0.699 | -0.333 |
| 4080 | LDV | 4917 | 0.0002749065 | 140.10 | 0.614 | 1.500  |
| 4081 | LCA | 2724 | 0.0001522972 | 119.10 | 0.522 | 2.700  |
| 4082 | LCR | 2586 | 0.0001445817 | 153.77 | 0.674 | 0.600  |
| 4083 | LCN | 1368 | 0.0000764841 | 130.67 | 0.573 | 0.933  |
| 4084 | LCD | 1851 | 0.0001034883 | 128.20 | 0.562 | 0.933  |
| 4085 | LCC | 1344 | 0.0000751422 | 123.53 | 0.541 | 2.933  |
| 4086 | LCQ | 2065 | 0.0001154529 | 138.90 | 0.609 | 0.933  |
| 4087 | LCE | 2216 | 0.0001238952 | 136.50 | 0.598 | 0.933  |
| 4088 | LCG | 3070 | 0.0001716419 | 110.73 | 0.485 | 1.967  |
| 4089 | LCH | 1290 | 0.0000721231 | 142.43 | 0.624 | 1.033  |
| 4090 | LCI | 1398 | 0.0000781613 | 143.73 | 0.630 | 3.600  |
| 4091 | LCL | 4333 | 0.0002422554 | 143.77 | 0.630 | 3.367  |
| 4092 | LCK | 2031 | 0.0001135520 | 144.87 | 0.635 | 0.800  |
| 4093 | LCM | 602  | 0.0000336575 | 144.77 | 0.634 | 2.733  |
| 4094 | LCF | 1474 | 0.0000824105 | 153.07 | 0.671 | 3.033  |
| 4095 | LCP | 2531 | 0.0001415067 | 130.07 | 0.570 | 1.567  |
| 4096 | LCS | 3569 | 0.0001995406 | 120.90 | 0.530 | 1.833  |
| 4097 | LCT | 1975 | 0.0001104211 | 129.60 | 0.568 | 1.867  |
| 4098 | LCW | 579  | 0.0000323715 | 165.17 | 0.724 | 1.800  |
| 4099 | LCY | 1052 | 0.0000588167 | 154.77 | 0.678 | 1.667  |
| 4100 | LCV | 2145 | 0.0001199257 | 135.43 | 0.593 | 3.500  |
| 4101 | LQA | 8848 | 0.0004946864 | 134.47 | 0.589 | 0.700  |
| 4102 | LQR | 6558 | 0.0003666538 | 169.13 | 0.741 | -1.400 |

|      |      |       |              |        |       |        |
|------|------|-------|--------------|--------|-------|--------|
| 4103 | LQN  | 4067  | 0.0002273835 | 146.03 | 0.640 | -1.067 |
| 4104 | LQD  | 5871  | 0.0003282441 | 143.57 | 0.629 | -1.067 |
| 4105 | LQC  | 1805  | 0.0001009165 | 138.90 | 0.609 | 0.933  |
| 4106 | LQQ  | 6830  | 0.0003818612 | 154.27 | 0.676 | -1.067 |
| 4107 | LQE  | 9869  | 0.0005517699 | 151.87 | 0.665 | -1.067 |
| 4108 | LQG  | 6416  | 0.0003587147 | 126.10 | 0.553 | -0.033 |
| 4109 | LQH  | 2967  | 0.0001658832 | 157.80 | 0.691 | -0.967 |
| 4110 | LQI  | 3368  | 0.0001883029 | 159.10 | 0.697 | 1.600  |
| 4111 | LQL  | 9030  | 0.0005048619 | 159.13 | 0.697 | 1.367  |
| 4112 | LQK  | 6680  | 0.0003734748 | 160.23 | 0.702 | -1.200 |
| 4113 | LQM  | 1870  | 0.0001045506 | 160.13 | 0.702 | 0.733  |
| 4114 | LQF  | 2429  | 0.0001358039 | 168.43 | 0.738 | 1.033  |
| 4115 | LQP  | 6006  | 0.0003357918 | 145.43 | 0.637 | -0.433 |
| 4116 | LQS  | 6773  | 0.0003786744 | 136.27 | 0.597 | -0.167 |
| 4117 | LQT  | 4709  | 0.0002632774 | 144.97 | 0.635 | -0.133 |
| 4118 | LQW  | 1085  | 0.0000606617 | 180.53 | 0.791 | -0.200 |
| 4119 | LQY  | 2005  | 0.0001120983 | 170.13 | 0.746 | -0.333 |
| 4120 | LQV  | 5788  | 0.0003236036 | 150.80 | 0.661 | 1.500  |
| 4121 | LEA  | 9824  | 0.0005492539 | 132.07 | 0.579 | 0.700  |
| 4122 | LER  | 7931  | 0.0004434175 | 166.73 | 0.731 | -1.400 |
| 4123 | LEN  | 6406  | 0.0003581556 | 143.63 | 0.629 | -1.067 |
| 4124 | LED  | 7592  | 0.0004244642 | 141.17 | 0.619 | -1.067 |
| 4125 | LEC  | 2086  | 0.0001166270 | 136.50 | 0.598 | 0.933  |
| 4126 | LEQ  | 6977  | 0.0003900799 | 151.87 | 0.665 | -1.067 |
| 4127 | LEE  | 14262 | 0.0007973799 | 149.47 | 0.655 | -1.067 |
| 4128 | LEG  | 7280  | 0.0004070204 | 123.70 | 0.542 | -0.033 |
| 4129 | LEH  | 2862  | 0.0001600127 | 155.40 | 0.681 | -0.967 |
| 4130 | LEI  | 4284  | 0.0002395159 | 156.70 | 0.687 | 1.600  |
| 4131 | LEL  | 10193 | 0.0005698845 | 156.73 | 0.687 | 1.367  |
| 4132 | LEK  | 10198 | 0.0005701641 | 157.83 | 0.692 | -1.200 |
| 4133 | LEM  | 2497  | 0.0001396058 | 157.73 | 0.691 | 0.733  |
| 4134 | LEF  | 2832  | 0.0001583354 | 166.03 | 0.728 | 1.033  |
| 4135 | LEP  | 5690  | 0.0003181245 | 143.03 | 0.627 | -0.433 |
| 4136 | LES  | 8131  | 0.0004545993 | 133.87 | 0.587 | -0.167 |
| 4137 | LET  | 5894  | 0.0003295300 | 142.57 | 0.625 | -0.133 |
| 4138 | LEW  | 1175  | 0.0000656935 | 178.13 | 0.781 | -0.200 |
| 4139 | LEY  | 2479  | 0.0001385994 | 167.73 | 0.735 | -0.333 |
| 4140 | LEV  | 6302  | 0.0003523410 | 148.40 | 0.650 | 1.500  |
| 4141 | LGA  | 8391  | 0.0004691358 | 106.30 | 0.466 | 1.733  |
| 4142 | LGR  | 6571  | 0.0003673807 | 140.97 | 0.618 | -0.367 |
| 4143 | LGN  | 4067  | 0.0002273835 | 117.87 | 0.517 | -0.033 |
| 4144 | LGD  | 5013  | 0.0002802738 | 115.40 | 0.506 | -0.033 |
| 4145 | LGC  | 2486  | 0.0001389908 | 110.73 | 0.485 | 1.967  |
| 4146 | LGQ  | 4735  | 0.0002647310 | 126.10 | 0.553 | -0.033 |
| 4147 | LGE  | 6226  | 0.0003480919 | 123.70 | 0.542 | -0.033 |
| 4148 | LGG  | 7741  | 0.0004327947 | 97.93  | 0.429 | 1.000  |
| 4149 | LGH  | 2839  | 0.0001587268 | 129.63 | 0.568 | 0.067  |
| 4150 | LGI  | 4861  | 0.0002717756 | 130.93 | 0.574 | 2.633  |
| 4151 | LGL  | 12504 | 0.0006990911 | 130.97 | 0.574 | 2.400  |
| 4152 | L GK | 5612  | 0.0003137636 | 132.07 | 0.579 | -0.167 |
| 4153 | LGM  | 2195  | 0.0001227211 | 131.97 | 0.578 | 1.767  |
| 4154 | LGF  | 4102  | 0.0002293404 | 140.27 | 0.615 | 2.067  |



|      |     |       |              |        |       |        |
|------|-----|-------|--------------|--------|-------|--------|
| 4155 | LGP | 7886  | 0.0004409015 | 117.27 | 0.514 | 0.600  |
| 4156 | LGS | 9796  | 0.0005476885 | 108.10 | 0.474 | 0.867  |
| 4157 | LGT | 5857  | 0.0003274613 | 116.80 | 0.512 | 0.900  |
| 4158 | LGW | 1378  | 0.0000770432 | 152.37 | 0.668 | 0.833  |
| 4159 | LGY | 2580  | 0.0001442463 | 141.97 | 0.622 | 0.700  |
| 4160 | LGV | 6101  | 0.0003411032 | 122.63 | 0.537 | 2.533  |
| 4161 | LHA | 2709  | 0.0001514586 | 138.00 | 0.605 | 0.800  |
| 4162 | LHR | 3253  | 0.0001818733 | 172.67 | 0.757 | -1.300 |
| 4163 | LHN | 1852  | 0.0001035442 | 149.57 | 0.655 | -0.967 |
| 4164 | LHD | 1848  | 0.0001033206 | 147.10 | 0.645 | -0.967 |
| 4165 | LHC | 1443  | 0.0000806773 | 142.43 | 0.624 | 1.033  |
| 4166 | LHQ | 2791  | 0.0001560431 | 157.80 | 0.691 | -0.967 |
| 4167 | LHE | 2675  | 0.0001495576 | 155.40 | 0.681 | -0.967 |
| 4168 | LHG | 2900  | 0.0001621373 | 129.63 | 0.568 | 0.067  |
| 4169 | LHH | 1646  | 0.0000920269 | 161.33 | 0.707 | -0.867 |
| 4170 | LHI | 2169  | 0.0001212675 | 162.63 | 0.713 | 1.700  |
| 4171 | LHL | 5682  | 0.0003176772 | 162.67 | 0.713 | 1.467  |
| 4172 | LHK | 2341  | 0.0001308839 | 163.77 | 0.718 | -1.100 |
| 4173 | LHM | 876   | 0.0000489766 | 163.67 | 0.717 | 0.833  |
| 4174 | LHF | 1852  | 0.0001035442 | 171.97 | 0.754 | 1.133  |
| 4175 | LHP | 3108  | 0.0001737664 | 148.97 | 0.653 | -0.333 |
| 4176 | LHS | 4360  | 0.0002437650 | 139.80 | 0.613 | -0.067 |
| 4177 | LHT | 2886  | 0.0001613545 | 148.50 | 0.651 | -0.033 |
| 4178 | LHW | 673   | 0.0000376270 | 184.07 | 0.807 | -0.100 |
| 4179 | LHY | 1599  | 0.0000893991 | 173.67 | 0.761 | -0.233 |
| 4180 | LHV | 2729  | 0.0001525768 | 154.33 | 0.676 | 1.600  |
| 4181 | LIA | 3948  | 0.0002207303 | 139.30 | 0.610 | 3.367  |
| 4182 | LIR | 3789  | 0.0002118407 | 173.97 | 0.762 | 1.267  |
| 4183 | LIN | 2778  | 0.0001553163 | 150.87 | 0.661 | 1.600  |
| 4184 | LID | 3192  | 0.0001784628 | 148.40 | 0.650 | 1.600  |
| 4185 | LIC | 1597  | 0.0000892873 | 143.73 | 0.630 | 3.600  |
| 4186 | LIQ | 3973  | 0.0002221280 | 159.10 | 0.697 | 1.600  |
| 4187 | LIE | 3845  | 0.0002149716 | 156.70 | 0.687 | 1.600  |
| 4188 | LIG | 3782  | 0.0002114494 | 130.93 | 0.574 | 2.633  |
| 4189 | LIH | 2018  | 0.0001128252 | 162.63 | 0.713 | 1.700  |
| 4190 | LII | 3288  | 0.0001838301 | 163.93 | 0.718 | 4.267  |
| 4191 | LIL | 6625  | 0.0003703998 | 163.97 | 0.719 | 4.033  |
| 4192 | LIK | 4152  | 0.0002321358 | 165.07 | 0.723 | 1.467  |
| 4193 | LIM | 1131  | 0.0000632335 | 164.97 | 0.723 | 3.400  |
| 4194 | LIF | 2812  | 0.0001572172 | 173.27 | 0.759 | 3.700  |
| 4195 | LIP | 3714  | 0.0002076475 | 150.27 | 0.658 | 2.233  |
| 4196 | LIS | 5710  | 0.0003192427 | 141.10 | 0.618 | 2.500  |
| 4197 | LIT | 3694  | 0.0002065293 | 149.80 | 0.656 | 2.533  |
| 4198 | LIW | 700   | 0.0000391366 | 185.37 | 0.812 | 2.467  |
| 4199 | LIY | 2012  | 0.0001124897 | 174.97 | 0.767 | 2.333  |
| 4200 | LIV | 3574  | 0.0001998202 | 155.63 | 0.682 | 4.167  |
| 4201 | LLA | 14751 | 0.0008247196 | 139.33 | 0.611 | 3.133  |
| 4202 | LLR | 11656 | 0.0006516800 | 174.00 | 0.762 | 1.033  |
| 4203 | LLN | 6419  | 0.0003588824 | 150.90 | 0.661 | 1.367  |
| 4204 | LLD | 9691  | 0.0005418180 | 148.43 | 0.650 | 1.367  |
| 4205 | LLC | 4580  | 0.0002560650 | 143.77 | 0.630 | 3.367  |
| 4206 | LLQ | 11691 | 0.0006536368 | 159.13 | 0.697 | 1.367  |

|      |     |       |              |        |       |        |
|------|-----|-------|--------------|--------|-------|--------|
| 4207 | LLE | 13494 | 0.0007544414 | 156.73 | 0.687 | 1.367  |
| 4208 | LLG | 12966 | 0.0007249213 | 130.97 | 0.574 | 2.400  |
| 4209 | LLH | 5526  | 0.0003089554 | 162.67 | 0.713 | 1.467  |
| 4210 | LLI | 6289  | 0.0003516142 | 163.97 | 0.719 | 4.033  |
| 4211 | LLL | 25279 | 0.0014133340 | 164.00 | 0.719 | 3.800  |
| 4212 | LLK | 10290 | 0.0005753077 | 165.10 | 0.723 | 1.233  |
| 4213 | LLM | 3046  | 0.0001703000 | 165.00 | 0.723 | 3.167  |
| 4214 | LLF | 6514  | 0.0003641938 | 173.30 | 0.759 | 3.467  |
| 4215 | LLP | 11945 | 0.0006678378 | 150.30 | 0.659 | 2.000  |
| 4216 | LLS | 15494 | 0.0008662603 | 141.13 | 0.618 | 2.267  |
| 4217 | LLT | 9409  | 0.0005260516 | 149.83 | 0.657 | 2.300  |
| 4218 | LLW | 2431  | 0.0001359157 | 185.40 | 0.812 | 2.233  |
| 4219 | LLY | 4189  | 0.0002342045 | 175.00 | 0.767 | 2.100  |
| 4220 | LLV | 10653 | 0.0005956028 | 155.67 | 0.682 | 3.933  |
| 4221 | LKA | 7056  | 0.0003944967 | 140.43 | 0.615 | 0.567  |
| 4222 | LKR | 5678  | 0.0003174536 | 175.10 | 0.767 | -1.533 |
| 4223 | LKN | 4818  | 0.0002693715 | 152.00 | 0.666 | -1.200 |
| 4224 | LKD | 5946  | 0.0003324373 | 149.53 | 0.655 | -1.200 |
| 4225 | LKC | 1610  | 0.0000900141 | 144.87 | 0.635 | 0.800  |
| 4226 | LKQ | 5105  | 0.0002854175 | 160.23 | 0.702 | -1.200 |
| 4227 | LKE | 9920  | 0.0005546212 | 157.83 | 0.692 | -1.200 |
| 4228 | LKG | 5413  | 0.0003026376 | 132.07 | 0.579 | -0.167 |
| 4229 | LKH | 2637  | 0.0001474331 | 163.77 | 0.718 | -1.100 |
| 4230 | LKI | 4051  | 0.0002264890 | 165.07 | 0.723 | 1.467  |
| 4231 | LKL | 7526  | 0.0004207741 | 165.10 | 0.723 | 1.233  |
| 4232 | LKK | 8178  | 0.0004572271 | 166.20 | 0.728 | -1.333 |
| 4233 | LKM | 2119  | 0.0001184720 | 166.10 | 0.728 | 0.600  |
| 4234 | LKF | 2428  | 0.0001357480 | 174.40 | 0.764 | 0.900  |
| 4235 | LKP | 4910  | 0.0002745152 | 151.40 | 0.663 | -0.567 |
| 4236 | LKS | 6767  | 0.0003783389 | 142.23 | 0.623 | -0.300 |
| 4237 | LKT | 5454  | 0.0003049299 | 150.93 | 0.661 | -0.267 |
| 4238 | LKW | 933   | 0.0000521635 | 186.50 | 0.817 | -0.333 |
| 4239 | LKY | 2383  | 0.0001332321 | 176.10 | 0.772 | -0.467 |
| 4240 | LKV | 5321  | 0.0002974939 | 156.77 | 0.687 | 1.367  |
| 4241 | LMA | 2634  | 0.0001472654 | 140.33 | 0.615 | 2.500  |
| 4242 | LMR | 1649  | 0.0000921946 | 175.00 | 0.767 | 0.400  |
| 4243 | LMN | 1340  | 0.0000749186 | 151.90 | 0.666 | 0.733  |
| 4244 | LMD | 1869  | 0.0001044947 | 149.43 | 0.655 | 0.733  |
| 4245 | LMC | 542   | 0.0000303029 | 144.77 | 0.634 | 2.733  |
| 4246 | LMQ | 1433  | 0.0000801182 | 160.13 | 0.702 | 0.733  |
| 4247 | LME | 2783  | 0.0001555959 | 157.73 | 0.691 | 0.733  |
| 4248 | LMG | 1991  | 0.0001113156 | 131.97 | 0.578 | 1.767  |
| 4249 | LMH | 741   | 0.0000414289 | 163.67 | 0.717 | 0.833  |
| 4250 | LMI | 1059  | 0.0000592081 | 164.97 | 0.723 | 3.400  |
| 4251 | LML | 2663  | 0.0001488867 | 165.00 | 0.723 | 3.167  |
| 4252 | LMK | 2289  | 0.0001279766 | 166.10 | 0.728 | 0.600  |
| 4253 | LMM | 650   | 0.0000363411 | 166.00 | 0.727 | 2.533  |
| 4254 | LMF | 953   | 0.0000532817 | 174.30 | 0.764 | 2.833  |
| 4255 | LMP | 1419  | 0.0000793354 | 151.30 | 0.663 | 1.367  |
| 4256 | LMS | 2214  | 0.0001237834 | 142.13 | 0.623 | 1.633  |
| 4257 | LMT | 1743  | 0.0000974501 | 150.83 | 0.661 | 1.667  |
| 4258 | LMW | 411   | 0.0000229788 | 186.40 | 0.817 | 1.600  |

|      |     |       |              |        |       |        |
|------|-----|-------|--------------|--------|-------|--------|
| 4259 | LMY | 723   | 0.0000404225 | 176.00 | 0.771 | 1.467  |
| 4260 | LMV | 2002  | 0.0001119306 | 156.67 | 0.687 | 3.300  |
| 4261 | LFA | 3344  | 0.0001869610 | 148.63 | 0.651 | 2.800  |
| 4262 | LFR | 3249  | 0.0001816496 | 183.30 | 0.803 | 0.700  |
| 4263 | LFN | 2186  | 0.0001222179 | 160.20 | 0.702 | 1.033  |
| 4264 | LFD | 2602  | 0.0001454763 | 157.73 | 0.691 | 1.033  |
| 4265 | LFC | 1651  | 0.0000923064 | 153.07 | 0.671 | 3.033  |
| 4266 | LFQ | 3084  | 0.0001724246 | 168.43 | 0.738 | 1.033  |
| 4267 | LFE | 3148  | 0.0001760028 | 166.03 | 0.728 | 1.033  |
| 4268 | LFG | 3752  | 0.0002097721 | 140.27 | 0.615 | 2.067  |
| 4269 | LFH | 1661  | 0.0000928655 | 171.97 | 0.754 | 1.133  |
| 4270 | LFI | 2665  | 0.0001489985 | 173.27 | 0.759 | 3.700  |
| 4271 | LFL | 7025  | 0.0003927635 | 173.30 | 0.759 | 3.467  |
| 4272 | LFK | 2607  | 0.0001457558 | 174.40 | 0.764 | 0.900  |
| 4273 | LFM | 1131  | 0.0000632335 | 174.30 | 0.764 | 2.833  |
| 4274 | LFF | 2539  | 0.0001419540 | 182.60 | 0.800 | 3.133  |
| 4275 | LFP | 3568  | 0.0001994847 | 159.60 | 0.699 | 1.667  |
| 4276 | LFS | 5658  | 0.0003163354 | 150.43 | 0.659 | 1.933  |
| 4277 | LFT | 3081  | 0.0001722569 | 159.13 | 0.697 | 1.967  |
| 4278 | LFW | 801   | 0.0000447834 | 194.70 | 0.853 | 1.900  |
| 4279 | LFY | 1846  | 0.0001032088 | 184.30 | 0.808 | 1.767  |
| 4280 | LFV | 3404  | 0.0001903156 | 164.97 | 0.723 | 3.600  |
| 4281 | LPA | 9031  | 0.0005049178 | 125.63 | 0.551 | 1.333  |
| 4282 | LPR | 6484  | 0.0003625166 | 160.30 | 0.702 | -0.767 |
| 4283 | LPN | 3085  | 0.0001724805 | 137.20 | 0.601 | -0.433 |
| 4284 | LPD | 4752  | 0.0002656815 | 134.73 | 0.590 | -0.433 |
| 4285 | LPC | 2256  | 0.0001261316 | 130.07 | 0.570 | 1.567  |
| 4286 | LPQ | 5270  | 0.0002946426 | 145.43 | 0.637 | -0.433 |
| 4287 | LPE | 7597  | 0.0004247437 | 143.03 | 0.627 | -0.433 |
| 4288 | LPG | 10168 | 0.0005684868 | 117.27 | 0.514 | 0.600  |
| 4289 | LPH | 2743  | 0.0001533595 | 148.97 | 0.653 | -0.333 |
| 4290 | LPI | 2992  | 0.0001672809 | 150.27 | 0.658 | 2.233  |
| 4291 | LPL | 10289 | 0.0005752518 | 150.30 | 0.659 | 2.000  |
| 4292 | LPK | 4834  | 0.0002702660 | 151.40 | 0.663 | -0.567 |
| 4293 | LPM | 1425  | 0.0000796709 | 151.30 | 0.663 | 1.367  |
| 4294 | LPF | 3480  | 0.0001945647 | 159.60 | 0.699 | 1.667  |
| 4295 | LPP | 12055 | 0.0006739878 | 136.60 | 0.599 | 0.200  |
| 4296 | LPS | 10362 | 0.0005793332 | 127.43 | 0.558 | 0.467  |
| 4297 | LPT | 5436  | 0.0003039235 | 136.13 | 0.597 | 0.500  |
| 4298 | LPW | 1415  | 0.0000791118 | 171.70 | 0.752 | 0.433  |
| 4299 | LPY | 2135  | 0.0001193666 | 161.30 | 0.707 | 0.300  |
| 4300 | LPV | 6681  | 0.0003735307 | 141.97 | 0.622 | 2.133  |
| 4301 | LSA | 9620  | 0.0005378484 | 116.47 | 0.510 | 1.600  |
| 4302 | LSR | 8668  | 0.0004846227 | 151.13 | 0.662 | -0.500 |
| 4303 | LSN | 4826  | 0.0002698188 | 128.03 | 0.561 | -0.167 |
| 4304 | LSD | 6631  | 0.0003707352 | 125.57 | 0.550 | -0.167 |
| 4305 | LSC | 3414  | 0.0001908747 | 120.90 | 0.530 | 1.833  |
| 4306 | LSQ | 7027  | 0.0003928753 | 136.27 | 0.597 | -0.167 |
| 4307 | LSE | 9032  | 0.0005049737 | 133.87 | 0.587 | -0.167 |
| 4308 | LSG | 9053  | 0.0005061478 | 108.10 | 0.474 | 0.867  |
| 4309 | LSH | 4006  | 0.0002239731 | 139.80 | 0.613 | -0.067 |
| 4310 | LSI | 4772  | 0.0002667996 | 141.10 | 0.618 | 2.500  |

|      |     |       |              |        |       |        |
|------|-----|-------|--------------|--------|-------|--------|
| 4311 | LSL | 14141 | 0.0007906148 | 141.13 | 0.618 | 2.267  |
| 4312 | LSK | 7050  | 0.0003941613 | 142.23 | 0.623 | -0.300 |
| 4313 | LSM | 2307  | 0.0001289830 | 142.13 | 0.623 | 1.633  |
| 4314 | LSF | 4831  | 0.0002700983 | 150.43 | 0.659 | 1.933  |
| 4315 | LSP | 11049 | 0.0006177429 | 127.43 | 0.558 | 0.467  |
| 4316 | LSS | 14383 | 0.0008041449 | 118.27 | 0.518 | 0.733  |
| 4317 | LST | 7349  | 0.0004108782 | 126.97 | 0.556 | 0.767  |
| 4318 | LSW | 2152  | 0.0001203170 | 162.53 | 0.712 | 0.700  |
| 4319 | LSY | 3289  | 0.0001838860 | 152.13 | 0.667 | 0.567  |
| 4320 | LSV | 7889  | 0.0004410692 | 132.80 | 0.582 | 2.400  |
| 4321 | LTA | 6814  | 0.0003809666 | 125.17 | 0.548 | 1.633  |
| 4322 | LTR | 4829  | 0.0002699865 | 159.83 | 0.700 | -0.467 |
| 4323 | LTN | 3210  | 0.0001794692 | 136.73 | 0.599 | -0.133 |
| 4324 | LTD | 4194  | 0.0002344840 | 134.27 | 0.588 | -0.133 |
| 4325 | LTC | 2317  | 0.0001295421 | 129.60 | 0.568 | 1.867  |
| 4326 | LTQ | 4410  | 0.0002465605 | 144.97 | 0.635 | -0.133 |
| 4327 | LTE | 6462  | 0.0003612865 | 142.57 | 0.625 | -0.133 |
| 4328 | LTG | 5710  | 0.0003192427 | 116.80 | 0.512 | 0.900  |
| 4329 | LTH | 2300  | 0.0001285916 | 148.50 | 0.651 | -0.033 |
| 4330 | LTI | 3754  | 0.0002098839 | 149.80 | 0.656 | 2.533  |
| 4331 | LTL | 8808  | 0.0004924500 | 149.83 | 0.657 | 2.300  |
| 4332 | LTK | 4533  | 0.0002534373 | 150.93 | 0.661 | -0.267 |
| 4333 | LTM | 1565  | 0.0000874982 | 150.83 | 0.661 | 1.667  |
| 4334 | LTF | 3440  | 0.0001923283 | 159.13 | 0.697 | 1.967  |
| 4335 | LTP | 6128  | 0.0003426128 | 136.13 | 0.597 | 0.500  |
| 4336 | LTS | 7443  | 0.0004161337 | 126.97 | 0.556 | 0.767  |
| 4337 | LTT | 4954  | 0.0002769752 | 135.67 | 0.595 | 0.800  |
| 4338 | LTW | 1350  | 0.0000754777 | 171.23 | 0.750 | 0.733  |
| 4339 | LTY | 2220  | 0.0001241189 | 160.83 | 0.705 | 0.600  |
| 4340 | LTV | 6306  | 0.0003525647 | 141.50 | 0.620 | 2.433  |
| 4341 | LWA | 1731  | 0.0000967792 | 160.73 | 0.704 | 1.567  |
| 4342 | LWR | 1522  | 0.0000850941 | 195.40 | 0.856 | -0.533 |
| 4343 | LWN | 939   | 0.0000524989 | 172.30 | 0.755 | -0.200 |
| 4344 | LWD | 1215  | 0.0000679299 | 169.83 | 0.744 | -0.200 |
| 4345 | LWC | 400   | 0.0000223638 | 165.17 | 0.724 | 1.800  |
| 4346 | LWQ | 892   | 0.0000498712 | 180.53 | 0.791 | -0.200 |
| 4347 | LWE | 1616  | 0.0000903496 | 178.13 | 0.781 | -0.200 |
| 4348 | LWG | 1504  | 0.0000840877 | 152.37 | 0.668 | 0.833  |
| 4349 | LWH | 490   | 0.0000273956 | 184.07 | 0.807 | -0.100 |
| 4350 | LWI | 786   | 0.0000439448 | 185.37 | 0.812 | 2.467  |
| 4351 | LWL | 2127  | 0.0001189193 | 185.40 | 0.812 | 2.233  |
| 4352 | LWK | 1463  | 0.0000817954 | 186.50 | 0.817 | -0.333 |
| 4353 | LWM | 428   | 0.0000239292 | 186.40 | 0.817 | 1.600  |
| 4354 | LWF | 657   | 0.0000367325 | 194.70 | 0.853 | 1.900  |
| 4355 | LWP | 1093  | 0.0000611090 | 171.70 | 0.752 | 0.433  |
| 4356 | LWS | 1455  | 0.0000813482 | 162.53 | 0.712 | 0.700  |
| 4357 | LWT | 1065  | 0.0000595435 | 171.23 | 0.750 | 0.733  |
| 4358 | LWW | 295   | 0.0000164933 | 206.80 | 0.906 | 0.667  |
| 4359 | LWY | 449   | 0.0000251033 | 196.40 | 0.861 | 0.533  |
| 4360 | LWV | 1249  | 0.0000698308 | 177.07 | 0.776 | 2.367  |
| 4361 | LYA | 2465  | 0.0001378167 | 150.33 | 0.659 | 1.433  |
| 4362 | LYR | 3071  | 0.0001716978 | 185.00 | 0.811 | -0.667 |

|      |     |       |              |        |       |        |
|------|-----|-------|--------------|--------|-------|--------|
| 4363 | LYN | 1802  | 0.0001007487 | 161.90 | 0.709 | -0.333 |
| 4364 | LYD | 2054  | 0.0001148379 | 159.43 | 0.699 | -0.333 |
| 4365 | LYC | 1096  | 0.0000612767 | 154.77 | 0.678 | 1.667  |
| 4366 | LYQ | 2172  | 0.0001214352 | 170.13 | 0.746 | -0.333 |
| 4367 | LYE | 2664  | 0.0001489426 | 167.73 | 0.735 | -0.333 |
| 4368 | LYG | 2773  | 0.0001550368 | 141.97 | 0.622 | 0.700  |
| 4369 | LYH | 1356  | 0.0000758131 | 173.67 | 0.761 | -0.233 |
| 4370 | LYI | 1777  | 0.0000993510 | 174.97 | 0.767 | 2.333  |
| 4371 | LYL | 4269  | 0.0002386772 | 175.00 | 0.767 | 2.100  |
| 4372 | LYK | 2602  | 0.0001454763 | 176.10 | 0.772 | -0.467 |
| 4373 | LYM | 842   | 0.0000470757 | 176.00 | 0.771 | 1.467  |
| 4374 | LYF | 1823  | 0.0001019228 | 184.30 | 0.808 | 1.767  |
| 4375 | LYP | 2297  | 0.0001284239 | 161.30 | 0.707 | 0.300  |
| 4376 | LYS | 3492  | 0.0001952356 | 152.13 | 0.667 | 0.567  |
| 4377 | LYT | 2334  | 0.0001304925 | 160.83 | 0.705 | 0.600  |
| 4378 | LYW | 621   | 0.0000347197 | 196.40 | 0.861 | 0.533  |
| 4379 | LYY | 1369  | 0.0000765400 | 186.00 | 0.815 | 0.400  |
| 4380 | LYV | 2358  | 0.0001318344 | 166.67 | 0.730 | 2.233  |
| 4381 | LVA | 7586  | 0.0004241287 | 131.00 | 0.574 | 3.267  |
| 4382 | LVR | 5132  | 0.0002869270 | 165.67 | 0.726 | 1.167  |
| 4383 | LVN | 3826  | 0.0002139094 | 142.57 | 0.625 | 1.500  |
| 4384 | LVD | 4855  | 0.0002714401 | 140.10 | 0.614 | 1.500  |
| 4385 | LVC | 2325  | 0.0001299893 | 135.43 | 0.593 | 3.500  |
| 4386 | LVQ | 4842  | 0.0002707133 | 150.80 | 0.661 | 1.500  |
| 4387 | LVE | 6481  | 0.0003623488 | 148.40 | 0.650 | 1.500  |
| 4388 | LVG | 6242  | 0.0003489865 | 122.63 | 0.537 | 2.533  |
| 4389 | LVH | 2719  | 0.0001520177 | 154.33 | 0.676 | 1.600  |
| 4390 | LVI | 4065  | 0.0002272717 | 155.63 | 0.682 | 4.167  |
| 4391 | LVL | 10552 | 0.0005899560 | 155.67 | 0.682 | 3.933  |
| 4392 | LVK | 5187  | 0.0002900021 | 156.77 | 0.687 | 1.367  |
| 4393 | LVM | 1752  | 0.0000979533 | 156.67 | 0.687 | 3.300  |
| 4394 | LVF | 3636  | 0.0002032866 | 164.97 | 0.723 | 3.600  |
| 4395 | LVP | 5758  | 0.0003219263 | 141.97 | 0.622 | 2.133  |
| 4396 | LVS | 8030  | 0.0004489525 | 132.80 | 0.582 | 2.400  |
| 4397 | LVT | 5908  | 0.0003303127 | 141.50 | 0.620 | 2.433  |
| 4398 | LVW | 1131  | 0.0000632335 | 177.07 | 0.776 | 2.367  |
| 4399 | LVY | 2353  | 0.0001315548 | 166.67 | 0.730 | 2.233  |
| 4400 | LVV | 6255  | 0.0003497133 | 147.33 | 0.646 | 4.067  |
| 4401 | CAA | 5813  | 0.0003250013 | 115.77 | 0.507 | -0.100 |
| 4402 | KAR | 3579  | 0.0002000997 | 150.43 | 0.659 | -2.200 |
| 4403 | KAN | 2078  | 0.0001161797 | 127.33 | 0.558 | -1.867 |
| 4404 | KAD | 2801  | 0.0001566022 | 124.87 | 0.547 | -1.867 |
| 4405 | KAC | 1284  | 0.0000717877 | 120.20 | 0.527 | 0.133  |
| 4406 | KAQ | 3154  | 0.0001763382 | 135.57 | 0.594 | -1.867 |
| 4407 | KAE | 5308  | 0.0002967671 | 133.17 | 0.584 | -1.867 |
| 4408 | KAG | 4032  | 0.0002254267 | 107.40 | 0.471 | -0.833 |
| 4409 | KAH | 1570  | 0.0000877778 | 139.10 | 0.610 | -1.767 |
| 4410 | KAI | 3311  | 0.0001851160 | 140.40 | 0.615 | 0.800  |
| 4411 | KAL | 7461  | 0.0004171400 | 140.43 | 0.615 | 0.567  |
| 4412 | KAK | 5117  | 0.0002860884 | 141.53 | 0.620 | -2.000 |
| 4413 | KAM | 1558  | 0.0000871068 | 141.43 | 0.620 | -0.067 |
| 4414 | KAF | 6202  | 0.0003467501 | 149.73 | 0.656 | 0.233  |

|      |     |      |              |        |       |        |
|------|-----|------|--------------|--------|-------|--------|
| 4415 | KAP | 3082 | 0.0001723128 | 126.73 | 0.555 | -1.233 |
| 4416 | KAS | 4962 | 0.0002774225 | 117.57 | 0.515 | -0.967 |
| 4417 | KAT | 3443 | 0.0001924961 | 126.27 | 0.553 | -0.933 |
| 4418 | KAW | 709  | 0.0000396398 | 161.83 | 0.709 | -1.000 |
| 4419 | KAY | 1760 | 0.0000984005 | 151.43 | 0.664 | -1.133 |
| 4420 | KAV | 4735 | 0.0002647310 | 132.10 | 0.579 | 0.700  |
| 4421 | KRA | 3261 | 0.0001823206 | 150.43 | 0.659 | -2.200 |
| 4422 | KRR | 5160 | 0.0002884925 | 185.10 | 0.811 | -4.300 |
| 4423 | KRN | 2135 | 0.0001193666 | 162.00 | 0.710 | -3.967 |
| 4424 | KRD | 2087 | 0.0001166829 | 159.53 | 0.699 | -3.967 |
| 4425 | KRC | 1016 | 0.0000568040 | 154.87 | 0.679 | -1.967 |
| 4426 | KRQ | 2810 | 0.0001571054 | 170.23 | 0.746 | -3.967 |
| 4427 | KRE | 3892 | 0.0002175994 | 167.83 | 0.735 | -3.967 |
| 4428 | KRG | 3158 | 0.0001765619 | 142.07 | 0.623 | -2.933 |
| 4429 | KRH | 1675 | 0.0000936482 | 173.77 | 0.761 | -3.867 |
| 4430 | KRI | 3236 | 0.0001809228 | 175.07 | 0.767 | -1.300 |
| 4431 | KRL | 5702 | 0.0003187954 | 175.10 | 0.767 | -1.533 |
| 4432 | KRK | 6214 | 0.0003474210 | 176.20 | 0.772 | -4.100 |
| 4433 | KRM | 1205 | 0.0000673708 | 176.10 | 0.772 | -2.167 |
| 4434 | KRF | 2062 | 0.0001152852 | 184.40 | 0.808 | -1.867 |
| 4435 | KRP | 2857 | 0.0001597332 | 161.40 | 0.707 | -3.333 |
| 4436 | KRS | 3950 | 0.0002208421 | 152.23 | 0.667 | -3.067 |
| 4437 | KRT | 2545 | 0.0001422894 | 160.93 | 0.705 | -3.033 |
| 4438 | KRW | 657  | 0.0000367325 | 196.50 | 0.861 | -3.100 |
| 4439 | KRY | 1429 | 0.0000798945 | 186.10 | 0.816 | -3.233 |
| 4440 | KRV | 2694 | 0.0001506199 | 166.77 | 0.731 | -1.400 |
| 4441 | KNA | 2131 | 0.0001191429 | 127.33 | 0.558 | -1.867 |
| 4442 | KNR | 2239 | 0.0001251811 | 162.00 | 0.710 | -3.967 |
| 4443 | KNN | 1683 | 0.0000940955 | 138.90 | 0.609 | -3.633 |
| 4444 | KND | 1565 | 0.0000874982 | 136.43 | 0.598 | -3.633 |
| 4445 | KNC | 1074 | 0.0000600467 | 131.77 | 0.577 | -1.633 |
| 4446 | KNQ | 1676 | 0.0000937042 | 147.13 | 0.645 | -3.633 |
| 4447 | KNE | 2354 | 0.0001316107 | 144.73 | 0.634 | -3.633 |
| 4448 | KNG | 2717 | 0.0001519058 | 118.97 | 0.521 | -2.600 |
| 4449 | KNH | 965  | 0.0000539526 | 150.67 | 0.660 | -3.533 |
| 4450 | KNI | 2422 | 0.0001354126 | 151.97 | 0.666 | -0.967 |
| 4451 | KNL | 4187 | 0.0002340927 | 152.00 | 0.666 | -1.200 |
| 4452 | KNK | 3276 | 0.0001831592 | 153.10 | 0.671 | -3.767 |
| 4453 | KNM | 988  | 0.0000552385 | 153.00 | 0.670 | -1.833 |
| 4454 | KNF | 1638 | 0.0000915796 | 161.30 | 0.707 | -1.533 |
| 4455 | KNP | 2035 | 0.0001137756 | 138.30 | 0.606 | -3.000 |
| 4456 | KNS | 3104 | 0.0001735428 | 129.13 | 0.566 | -2.733 |
| 4457 | KNT | 1818 | 0.0001016433 | 137.83 | 0.604 | -2.700 |
| 4458 | KNW | 562  | 0.0000314211 | 173.40 | 0.760 | -2.767 |
| 4459 | KNY | 1257 | 0.0000702781 | 163.00 | 0.714 | -2.900 |
| 4460 | KNV | 2401 | 0.0001342385 | 143.67 | 0.630 | -1.067 |
| 4461 | KDA | 2981 | 0.0001666659 | 124.87 | 0.547 | -1.867 |
| 4462 | KDR | 2679 | 0.0001497813 | 159.53 | 0.699 | -3.967 |
| 4463 | KDN | 1844 | 0.0001030969 | 136.43 | 0.598 | -3.633 |
| 4464 | KDD | 2426 | 0.0001356362 | 133.97 | 0.587 | -3.633 |
| 4465 | KDC | 1216 | 0.0000679858 | 129.30 | 0.567 | -1.633 |
| 4466 | KDQ | 1972 | 0.0001102533 | 144.67 | 0.634 | -3.633 |

|      |     |      |              |        |       |        |
|------|-----|------|--------------|--------|-------|--------|
| 4467 | KDE | 3317 | 0.0001854515 | 142.27 | 0.623 | -3.633 |
| 4468 | KDG | 3866 | 0.0002161457 | 116.50 | 0.511 | -2.600 |
| 4469 | KDH | 1255 | 0.0000701663 | 148.20 | 0.649 | -3.533 |
| 4470 | KDI | 2981 | 0.0001666659 | 149.50 | 0.655 | -0.967 |
| 4471 | KDL | 5775 | 0.0003228768 | 149.53 | 0.655 | -1.200 |
| 4472 | KDK | 3861 | 0.0002158662 | 150.63 | 0.660 | -3.767 |
| 4473 | KDM | 1312 | 0.0000733531 | 150.53 | 0.660 | -1.833 |
| 4474 | KDF | 2384 | 0.0001332880 | 158.83 | 0.696 | -1.533 |
| 4475 | KDP | 2732 | 0.0001527445 | 135.83 | 0.595 | -3.000 |
| 4476 | KDS | 4357 | 0.0002435973 | 126.67 | 0.555 | -2.733 |
| 4477 | KDT | 2529 | 0.0001413949 | 135.37 | 0.593 | -2.700 |
| 4478 | KDW | 643  | 0.0000359497 | 170.93 | 0.749 | -2.767 |
| 4479 | KDY | 1529 | 0.0000854855 | 160.53 | 0.703 | -2.900 |
| 4480 | KDV | 3506 | 0.0001960184 | 141.20 | 0.619 | -1.067 |
| 4481 | KCA | 851  | 0.0000475789 | 120.20 | 0.527 | 0.133  |
| 4482 | KCR | 1022 | 0.0000571394 | 154.87 | 0.679 | -1.967 |
| 4483 | KCN | 1421 | 0.0000794473 | 131.77 | 0.577 | -1.633 |
| 4484 | KCD | 1176 | 0.0000657495 | 129.30 | 0.567 | -1.633 |
| 4485 | KCC | 579  | 0.0000323715 | 124.63 | 0.546 | 0.367  |
| 4486 | KCQ | 928  | 0.0000518839 | 140.00 | 0.613 | -1.633 |
| 4487 | KCE | 2343 | 0.0001309957 | 137.60 | 0.603 | -1.633 |
| 4488 | KCG | 1566 | 0.0000875541 | 111.83 | 0.490 | -0.600 |
| 4489 | KCH | 638  | 0.0000356702 | 143.53 | 0.629 | -1.533 |
| 4490 | KCI | 905  | 0.0000505980 | 144.83 | 0.635 | 1.033  |
| 4491 | KCL | 1979 | 0.0001106447 | 144.87 | 0.635 | 0.800  |
| 4492 | KCK | 1740 | 0.0000972824 | 145.97 | 0.640 | -1.767 |
| 4493 | KCM | 314  | 0.0000175556 | 145.87 | 0.639 | 0.167  |
| 4494 | KCF | 906  | 0.0000506539 | 154.17 | 0.676 | 0.467  |
| 4495 | KCP | 1284 | 0.0000717877 | 131.17 | 0.575 | -1.000 |
| 4496 | KCS | 1748 | 0.0000977296 | 122.00 | 0.535 | -0.733 |
| 4497 | KCT | 965  | 0.0000539526 | 130.70 | 0.573 | -0.700 |
| 4498 | KCW | 210  | 0.0000117410 | 166.27 | 0.729 | -0.767 |
| 4499 | KCY | 538  | 0.0000300793 | 155.87 | 0.683 | -0.900 |
| 4500 | KCV | 1172 | 0.0000655258 | 136.53 | 0.598 | 0.933  |
| 4501 | KQA | 2780 | 0.0001554281 | 135.57 | 0.594 | -1.867 |
| 4502 | KQR | 2889 | 0.0001615223 | 170.23 | 0.746 | -3.967 |
| 4503 | KQN | 1672 | 0.0000934805 | 147.13 | 0.645 | -3.633 |
| 4504 | KQD | 1770 | 0.0000989596 | 144.67 | 0.634 | -3.633 |
| 4505 | KQC | 969  | 0.0000541762 | 140.00 | 0.613 | -1.633 |
| 4506 | KQQ | 2847 | 0.0001591741 | 155.37 | 0.681 | -3.633 |
| 4507 | KQE | 3914 | 0.0002188294 | 152.97 | 0.670 | -3.633 |
| 4508 | KQG | 2088 | 0.0001167388 | 127.20 | 0.557 | -2.600 |
| 4509 | KQH | 1168 | 0.0000653022 | 158.90 | 0.696 | -3.533 |
| 4510 | KQI | 2221 | 0.0001241748 | 160.20 | 0.702 | -0.967 |
| 4511 | KQL | 5099 | 0.0002850820 | 160.23 | 0.702 | -1.200 |
| 4512 | KQK | 3738 | 0.0002089893 | 161.33 | 0.707 | -3.767 |
| 4513 | KQM | 1168 | 0.0000653022 | 161.23 | 0.707 | -1.833 |
| 4514 | KQF | 1304 | 0.0000729059 | 169.53 | 0.743 | -1.533 |
| 4515 | KQP | 2072 | 0.0001158443 | 146.53 | 0.642 | -3.000 |
| 4516 | KQS | 2496 | 0.0001395499 | 137.37 | 0.602 | -2.733 |
| 4517 | KQT | 1944 | 0.0001086879 | 146.07 | 0.640 | -2.700 |
| 4518 | KQW | 497  | 0.0000277870 | 181.63 | 0.796 | -2.767 |

|      |     |      |              |        |       |        |
|------|-----|------|--------------|--------|-------|--------|
| 4519 | KQY | 1122 | 0.0000627303 | 171.23 | 0.750 | -2.900 |
| 4520 | KQV | 2432 | 0.0001359717 | 151.90 | 0.666 | -1.067 |
| 4521 | KEA | 6012 | 0.0003361273 | 133.17 | 0.584 | -1.867 |
| 4522 | KER | 4972 | 0.0002779815 | 167.83 | 0.735 | -3.967 |
| 4523 | KEN | 4020 | 0.0002247558 | 144.73 | 0.634 | -3.633 |
| 4524 | KED | 4169 | 0.0002330863 | 142.27 | 0.623 | -3.633 |
| 4525 | KEC | 2192 | 0.0001225534 | 137.60 | 0.603 | -1.633 |
| 4526 | KEQ | 3958 | 0.0002212894 | 152.97 | 0.670 | -3.633 |
| 4527 | KEE | 8995 | 0.0005029051 | 150.57 | 0.660 | -3.633 |
| 4528 | KEG | 4805 | 0.0002686447 | 124.80 | 0.547 | -2.600 |
| 4529 | KEH | 1689 | 0.0000944310 | 156.50 | 0.686 | -3.533 |
| 4530 | KEI | 4457 | 0.0002491882 | 157.80 | 0.691 | -0.967 |
| 4531 | KEL | 8833 | 0.0004938477 | 157.83 | 0.692 | -1.200 |
| 4532 | KEK | 8652 | 0.0004837281 | 158.93 | 0.696 | -3.767 |
| 4533 | KEM | 2040 | 0.0001140552 | 158.83 | 0.696 | -1.833 |
| 4534 | KEF | 2664 | 0.0001489426 | 167.13 | 0.732 | -1.533 |
| 4535 | KEP | 3474 | 0.0001942293 | 144.13 | 0.632 | -3.000 |
| 4536 | KES | 4717 | 0.0002637247 | 134.97 | 0.591 | -2.733 |
| 4537 | KET | 3865 | 0.0002160898 | 143.67 | 0.630 | -2.700 |
| 4538 | KEW | 775  | 0.0000433298 | 179.23 | 0.785 | -2.767 |
| 4539 | KEY | 2078 | 0.0001161797 | 168.83 | 0.740 | -2.900 |
| 4540 | KEV | 5030 | 0.0002812243 | 149.50 | 0.655 | -1.067 |
| 4541 | KGA | 3495 | 0.0001954034 | 107.40 | 0.471 | -0.833 |
| 4542 | KGR | 3339 | 0.0001866815 | 142.07 | 0.623 | -2.933 |
| 4543 | KGN | 2405 | 0.0001344621 | 118.97 | 0.521 | -2.600 |
| 4544 | KGD | 3364 | 0.0001880792 | 116.50 | 0.511 | -2.600 |
| 4545 | KGC | 1069 | 0.0000597671 | 111.83 | 0.490 | -0.600 |
| 4546 | KGQ | 2558 | 0.0001430163 | 127.20 | 0.557 | -2.600 |
| 4547 | KGE | 4721 | 0.0002639483 | 124.80 | 0.547 | -2.600 |
| 4548 | KGG | 3225 | 0.0001803078 | 99.03  | 0.434 | -1.567 |
| 4549 | KGH | 1535 | 0.0000858209 | 130.73 | 0.573 | -2.500 |
| 4550 | KGI | 2627 | 0.0001468740 | 132.03 | 0.579 | 0.067  |
| 4551 | KGL | 5276 | 0.0002949780 | 132.07 | 0.579 | -0.167 |
| 4552 | KGK | 4995 | 0.0002792675 | 133.17 | 0.584 | -2.733 |
| 4553 | KGM | 990  | 0.0000553503 | 133.07 | 0.583 | -0.800 |
| 4554 | KGF | 2924 | 0.0001634791 | 141.37 | 0.619 | -0.500 |
| 4555 | KGP | 3124 | 0.0001746610 | 118.37 | 0.519 | -1.967 |
| 4556 | KGS | 4568 | 0.0002553941 | 109.20 | 0.479 | -1.700 |
| 4557 | KGT | 2897 | 0.0001619695 | 117.90 | 0.517 | -1.667 |
| 4558 | KGW | 745  | 0.0000416525 | 153.47 | 0.673 | -1.733 |
| 4559 | KGY | 1690 | 0.0000944869 | 143.07 | 0.627 | -1.867 |
| 4560 | KGV | 2873 | 0.0001606277 | 123.73 | 0.542 | -0.033 |
| 4561 | KHA | 1158 | 0.0000647431 | 139.10 | 0.610 | -1.767 |
| 4562 | KHR | 1513 | 0.0000845909 | 173.77 | 0.761 | -3.867 |
| 4563 | KHN | 774  | 0.0000432739 | 150.67 | 0.660 | -3.533 |
| 4564 | KHD | 686  | 0.0000383538 | 148.20 | 0.649 | -3.533 |
| 4565 | KHC | 568  | 0.0000317565 | 143.53 | 0.629 | -1.533 |
| 4566 | KHQ | 1523 | 0.0000851500 | 158.90 | 0.696 | -3.533 |
| 4567 | KHE | 1322 | 0.0000739122 | 156.50 | 0.686 | -3.533 |
| 4568 | KHG | 1512 | 0.0000845350 | 130.73 | 0.573 | -2.500 |
| 4569 | KHH | 725  | 0.0000405343 | 162.43 | 0.712 | -3.433 |
| 4570 | KHI | 1271 | 0.0000710608 | 163.73 | 0.717 | -0.867 |



|      |     |      |              |        |       |        |
|------|-----|------|--------------|--------|-------|--------|
| 4571 | KHL | 3003 | 0.0001678959 | 163.77 | 0.718 | -1.100 |
| 4572 | KHK | 2073 | 0.0001159002 | 164.87 | 0.722 | -3.667 |
| 4573 | KHM | 604  | 0.0000337693 | 164.77 | 0.722 | -1.733 |
| 4574 | KHF | 1254 | 0.0000701104 | 173.07 | 0.758 | -1.433 |
| 4575 | KHP | 1230 | 0.0000687686 | 150.07 | 0.658 | -2.900 |
| 4576 | KHS | 1902 | 0.0001063397 | 140.90 | 0.617 | -2.633 |
| 4577 | KHT | 1083 | 0.0000605499 | 149.60 | 0.656 | -2.600 |
| 4578 | KHW | 414  | 0.0000231465 | 185.17 | 0.811 | -2.667 |
| 4579 | KHY | 775  | 0.0000433298 | 174.77 | 0.766 | -2.800 |
| 4580 | KHV | 1286 | 0.0000718995 | 155.43 | 0.681 | -0.967 |
| 4581 | KIA | 2588 | 0.0001446935 | 140.40 | 0.615 | 0.800  |
| 4582 | KIR | 2613 | 0.0001460913 | 175.07 | 0.767 | -1.300 |
| 4583 | KIN | 1973 | 0.0001103092 | 151.97 | 0.666 | -0.967 |
| 4584 | KID | 1779 | 0.0000994628 | 149.50 | 0.655 | -0.967 |
| 4585 | KIC | 1060 | 0.0000592640 | 144.83 | 0.635 | 1.033  |
| 4586 | KIQ | 2444 | 0.0001366426 | 160.20 | 0.702 | -0.967 |
| 4587 | KIE | 2954 | 0.0001651564 | 157.80 | 0.691 | -0.967 |
| 4588 | KIG | 1916 | 0.0001071224 | 132.03 | 0.579 | 0.067  |
| 4589 | KIH | 1999 | 0.0001117629 | 163.73 | 0.717 | -0.867 |
| 4590 | KII | 3172 | 0.0001773446 | 165.03 | 0.723 | 1.700  |
| 4591 | KIL | 5037 | 0.0002816156 | 165.07 | 0.723 | 1.467  |
| 4592 | KIK | 3476 | 0.0001943411 | 166.17 | 0.728 | -1.100 |
| 4593 | KIM | 1109 | 0.0000620035 | 166.07 | 0.728 | 0.833  |
| 4594 | KIF | 1976 | 0.0001104770 | 174.37 | 0.764 | 1.133  |
| 4595 | KIP | 2408 | 0.0001346298 | 151.37 | 0.663 | -0.333 |
| 4596 | KIS | 3507 | 0.0001960743 | 142.20 | 0.623 | -0.067 |
| 4597 | KIT | 2698 | 0.0001508436 | 150.90 | 0.661 | -0.033 |
| 4598 | KIW | 737  | 0.0000412052 | 186.47 | 0.817 | -0.100 |
| 4599 | KIY | 1456 | 0.0000814041 | 176.07 | 0.772 | -0.233 |
| 4600 | KIV | 2372 | 0.0001326171 | 156.73 | 0.687 | 1.600  |
| 4601 | KLA | 5144 | 0.0002875979 | 140.43 | 0.615 | 0.567  |
| 4602 | KLR | 5257 | 0.0002939157 | 175.10 | 0.767 | -1.533 |
| 4603 | KLN | 3216 | 0.0001798046 | 152.00 | 0.666 | -1.200 |
| 4604 | KLD | 3638 | 0.0002033984 | 149.53 | 0.655 | -1.200 |
| 4605 | KLC | 1836 | 0.0001026497 | 144.87 | 0.635 | 0.800  |
| 4606 | KLQ | 5450 | 0.0003047062 | 160.23 | 0.702 | -1.200 |
| 4607 | KLE | 6786 | 0.0003794012 | 157.83 | 0.692 | -1.200 |
| 4608 | KLG | 4279 | 0.0002392363 | 132.07 | 0.579 | -0.167 |
| 4609 | KLH | 2441 | 0.0001364748 | 163.77 | 0.718 | -1.100 |
| 4610 | KLI | 3704 | 0.0002070884 | 165.07 | 0.723 | 1.467  |
| 4611 | KLL | 9450 | 0.0005283438 | 165.10 | 0.723 | 1.233  |
| 4612 | KLK | 7060 | 0.0003947204 | 166.20 | 0.728 | -1.333 |
| 4613 | KLM | 1733 | 0.0000968910 | 166.10 | 0.728 | 0.600  |
| 4614 | KLF | 3259 | 0.0001822087 | 174.40 | 0.764 | 0.900  |
| 4615 | KLP | 4380 | 0.0002448832 | 151.40 | 0.663 | -0.567 |
| 4616 | KLS | 6246 | 0.0003492101 | 142.23 | 0.623 | -0.300 |
| 4617 | KLT | 4586 | 0.0002564005 | 150.93 | 0.661 | -0.267 |
| 4618 | KLW | 1144 | 0.0000639604 | 186.50 | 0.817 | -0.333 |
| 4619 | KLY | 2623 | 0.0001466504 | 176.10 | 0.772 | -0.467 |
| 4620 | KLV | 4737 | 0.0002648428 | 156.77 | 0.687 | 1.367  |
| 4621 | KKA | 5053 | 0.0002825102 | 141.53 | 0.620 | -2.000 |
| 4622 | KKR | 5143 | 0.0002875420 | 176.20 | 0.772 | -4.100 |

|      |     |      |              |        |       |        |
|------|-----|------|--------------|--------|-------|--------|
| 4623 | KKN | 2940 | 0.0001643736 | 153.10 | 0.671 | -3.767 |
| 4624 | KKD | 3539 | 0.0001978634 | 150.63 | 0.660 | -3.767 |
| 4625 | KKC | 1546 | 0.0000864359 | 145.97 | 0.640 | -1.767 |
| 4626 | KKQ | 3581 | 0.0002002116 | 161.33 | 0.707 | -3.767 |
| 4627 | KKE | 6435 | 0.0003597770 | 158.93 | 0.696 | -3.767 |
| 4628 | KKG | 4274 | 0.0002389568 | 133.17 | 0.584 | -2.733 |
| 4629 | KKH | 2017 | 0.0001127693 | 164.87 | 0.722 | -3.667 |
| 4630 | KKI | 4172 | 0.0002332540 | 166.17 | 0.728 | -1.100 |
| 4631 | KKL | 7583 | 0.0004239610 | 166.20 | 0.728 | -1.333 |
| 4632 | KKK | 9228 | 0.0005159319 | 167.30 | 0.733 | -3.900 |
| 4633 | KKM | 1944 | 0.0001086879 | 167.20 | 0.733 | -1.967 |
| 4634 | KKF | 2301 | 0.0001286475 | 175.50 | 0.769 | -1.667 |
| 4635 | KKP | 4282 | 0.0002394040 | 152.50 | 0.668 | -3.133 |
| 4636 | KKS | 4984 | 0.0002786524 | 143.33 | 0.628 | -2.867 |
| 4637 | KKT | 4004 | 0.0002238612 | 152.03 | 0.666 | -2.833 |
| 4638 | KKW | 736  | 0.0000411493 | 187.60 | 0.822 | -2.900 |
| 4639 | KKY | 2237 | 0.0001250693 | 177.20 | 0.777 | -3.033 |
| 4640 | KKV | 4061 | 0.0002270481 | 157.87 | 0.692 | -1.200 |
| 4641 | KMA | 1719 | 0.0000961083 | 141.43 | 0.620 | -0.067 |
| 4642 | KMR | 1249 | 0.0000698308 | 176.10 | 0.772 | -2.167 |
| 4643 | KMN | 900  | 0.0000503185 | 153.00 | 0.670 | -1.833 |
| 4644 | KMD | 1151 | 0.0000643517 | 150.53 | 0.660 | -1.833 |
| 4645 | KMC | 408  | 0.0000228110 | 145.87 | 0.639 | 0.167  |
| 4646 | KMQ | 1020 | 0.0000570276 | 161.23 | 0.707 | -1.833 |
| 4647 | KME | 1898 | 0.0001061160 | 158.83 | 0.696 | -1.833 |
| 4648 | KMG | 1116 | 0.0000623949 | 133.07 | 0.583 | -0.800 |
| 4649 | KMH | 563  | 0.0000314770 | 164.77 | 0.722 | -1.733 |
| 4650 | KMI | 1059 | 0.0000592081 | 166.07 | 0.728 | 0.833  |
| 4651 | KML | 2335 | 0.0001305484 | 166.10 | 0.728 | 0.600  |
| 4652 | KMK | 2017 | 0.0001127693 | 167.20 | 0.733 | -1.967 |
| 4653 | KMM | 607  | 0.0000339370 | 167.10 | 0.732 | -0.033 |
| 4654 | KMF | 783  | 0.0000437771 | 175.40 | 0.769 | 0.267  |
| 4655 | KMP | 1121 | 0.0000626744 | 152.40 | 0.668 | -1.200 |
| 4656 | KMS | 1532 | 0.0000856532 | 143.23 | 0.628 | -0.933 |
| 4657 | KMT | 1189 | 0.0000664763 | 151.93 | 0.666 | -0.900 |
| 4658 | KMW | 325  | 0.0000181706 | 187.50 | 0.822 | -0.967 |
| 4659 | KMY | 571  | 0.0000319243 | 177.10 | 0.776 | -1.100 |
| 4660 | KMV | 1397 | 0.0000781054 | 157.77 | 0.691 | 0.733  |
| 4661 | KFA | 1568 | 0.0000876659 | 149.73 | 0.656 | 0.233  |
| 4662 | KFR | 1543 | 0.0000862682 | 184.40 | 0.808 | -1.867 |
| 4663 | KFN | 1119 | 0.0000625626 | 161.30 | 0.707 | -1.533 |
| 4664 | KFD | 1347 | 0.0000753100 | 158.83 | 0.696 | -1.533 |
| 4665 | KFC | 808  | 0.0000451748 | 154.17 | 0.676 | 0.467  |
| 4666 | KFQ | 1458 | 0.0000815159 | 169.53 | 0.743 | -1.533 |
| 4667 | KFE | 1610 | 0.0000900141 | 167.13 | 0.732 | -1.533 |
| 4668 | KFG | 1579 | 0.0000882809 | 141.37 | 0.619 | -0.500 |
| 4669 | KFH | 841  | 0.0000470198 | 173.07 | 0.758 | -1.433 |
| 4670 | KFI | 1561 | 0.0000872746 | 174.37 | 0.764 | 1.133  |
| 4671 | KFL | 3201 | 0.0001789660 | 174.40 | 0.764 | 0.900  |
| 4672 | KFK | 1981 | 0.0001107565 | 175.50 | 0.769 | -1.667 |
| 4673 | KFM | 587  | 0.0000328188 | 175.40 | 0.769 | 0.267  |
| 4674 | KFF | 1329 | 0.0000743036 | 183.70 | 0.805 | 0.567  |

|      |     |      |              |        |       |        |
|------|-----|------|--------------|--------|-------|--------|
| 4675 | KFP | 1408 | 0.0000787204 | 160.70 | 0.704 | -0.900 |
| 4676 | KFS | 2475 | 0.0001383758 | 151.53 | 0.664 | -0.633 |
| 4677 | KFT | 1471 | 0.0000822427 | 160.23 | 0.702 | -0.600 |
| 4678 | KFW | 474  | 0.0000265011 | 195.80 | 0.858 | -0.667 |
| 4679 | KFY | 1117 | 0.0000624508 | 185.40 | 0.812 | -0.800 |
| 4680 | KFV | 1615 | 0.0000902937 | 166.07 | 0.728 | 1.033  |
| 4681 | KPA | 3407 | 0.0001904833 | 126.73 | 0.555 | -1.233 |
| 4682 | KPR | 2954 | 0.0001651564 | 161.40 | 0.707 | -3.333 |
| 4683 | KPN | 1559 | 0.0000871628 | 138.30 | 0.606 | -3.000 |
| 4684 | KPD | 2452 | 0.0001370899 | 135.83 | 0.595 | -3.000 |
| 4685 | KPC | 949  | 0.0000530580 | 131.17 | 0.575 | -1.000 |
| 4686 | KPQ | 2370 | 0.0001325053 | 146.53 | 0.642 | -3.000 |
| 4687 | KPE | 3945 | 0.0002205626 | 144.13 | 0.632 | -3.000 |
| 4688 | KPG | 4020 | 0.0002247558 | 118.37 | 0.519 | -1.967 |
| 4689 | KPH | 1358 | 0.0000759250 | 150.07 | 0.658 | -2.900 |
| 4690 | KPI | 2028 | 0.0001133843 | 151.37 | 0.663 | -0.333 |
| 4691 | KPL | 4857 | 0.0002715520 | 151.40 | 0.663 | -0.567 |
| 4692 | KPK | 3594 | 0.0002009384 | 152.50 | 0.668 | -3.133 |
| 4693 | KPM | 797  | 0.0000445598 | 152.40 | 0.668 | -1.200 |
| 4694 | KPF | 2675 | 0.0001495576 | 160.70 | 0.704 | -0.900 |
| 4695 | KPP | 3951 | 0.0002208980 | 137.70 | 0.603 | -2.367 |
| 4696 | KPS | 4523 | 0.0002528782 | 128.53 | 0.563 | -2.100 |
| 4697 | KPT | 2674 | 0.0001495017 | 137.23 | 0.601 | -2.067 |
| 4698 | KPW | 646  | 0.0000361175 | 172.80 | 0.757 | -2.133 |
| 4699 | KPY | 5755 | 0.0003217586 | 162.40 | 0.712 | -2.267 |
| 4700 | KPV | 3430 | 0.0001917692 | 143.07 | 0.627 | -0.433 |
| 4701 | KSA | 3632 | 0.0002030629 | 117.57 | 0.515 | -0.967 |
| 4702 | KSR | 3646 | 0.0002038457 | 152.23 | 0.667 | -3.067 |
| 4703 | KSN | 2248 | 0.0001256843 | 129.13 | 0.566 | -2.733 |
| 4704 | KSD | 2800 | 0.0001565463 | 126.67 | 0.555 | -2.733 |
| 4705 | KSC | 1527 | 0.0000853737 | 122.00 | 0.535 | -0.733 |
| 4706 | KSQ | 3353 | 0.0001874642 | 137.37 | 0.602 | -2.733 |
| 4707 | KSE | 4298 | 0.0002402986 | 134.97 | 0.591 | -2.733 |
| 4708 | KSG | 3737 | 0.0002089334 | 109.20 | 0.479 | -1.700 |
| 4709 | KSH | 1925 | 0.0001076256 | 140.90 | 0.617 | -2.633 |
| 4710 | KSI | 2830 | 0.0001582236 | 142.20 | 0.623 | -0.067 |
| 4711 | KSL | 6832 | 0.0003819730 | 142.23 | 0.623 | -0.300 |
| 4712 | KSK | 5039 | 0.0002817275 | 143.33 | 0.628 | -2.867 |
| 4713 | KSM | 1225 | 0.0000684890 | 143.23 | 0.628 | -0.933 |
| 4714 | KSF | 3596 | 0.0002010502 | 151.53 | 0.664 | -0.633 |
| 4715 | KSP | 4145 | 0.0002317445 | 128.53 | 0.563 | -2.100 |
| 4716 | KSS | 6343 | 0.0003546333 | 119.37 | 0.523 | -1.833 |
| 4717 | KST | 3625 | 0.0002026716 | 128.07 | 0.561 | -1.800 |
| 4718 | KSW | 841  | 0.0000470198 | 163.63 | 0.717 | -1.867 |
| 4719 | KSY | 1995 | 0.0001115393 | 153.23 | 0.671 | -2.000 |
| 4720 | KSV | 3664 | 0.0002048520 | 133.90 | 0.587 | -0.167 |
| 4721 | KTA | 3184 | 0.0001780155 | 126.27 | 0.553 | -0.933 |
| 4722 | KTR | 2527 | 0.0001412831 | 160.93 | 0.705 | -3.033 |
| 4723 | KTN | 1651 | 0.0000923064 | 137.83 | 0.604 | -2.700 |
| 4724 | KTD | 2180 | 0.0001218825 | 135.37 | 0.593 | -2.700 |
| 4725 | KTC | 1281 | 0.0000716199 | 130.70 | 0.573 | -0.700 |
| 4726 | KTQ | 2236 | 0.0001250134 | 146.07 | 0.640 | -2.700 |

|      |     |      |              |        |       |        |
|------|-----|------|--------------|--------|-------|--------|
| 4727 | KTE | 3807 | 0.0002128471 | 143.67 | 0.630 | -2.700 |
| 4728 | KTG | 3002 | 0.0001678400 | 117.90 | 0.517 | -1.667 |
| 4729 | KTH | 1704 | 0.0000952696 | 149.60 | 0.656 | -2.600 |
| 4730 | KTI | 2703 | 0.0001511231 | 150.90 | 0.661 | -0.033 |
| 4731 | KTL | 5530 | 0.0003091790 | 150.93 | 0.661 | -0.267 |
| 4732 | KTK | 3784 | 0.0002115612 | 152.03 | 0.666 | -2.833 |
| 4733 | KTM | 1080 | 0.0000603822 | 151.93 | 0.666 | -0.900 |
| 4734 | KTF | 2871 | 0.0001605159 | 160.23 | 0.702 | -0.600 |
| 4735 | KTP | 3179 | 0.0001777360 | 137.23 | 0.601 | -2.067 |
| 4736 | KTS | 4210 | 0.0002353786 | 128.07 | 0.561 | -1.800 |
| 4737 | KTT | 2989 | 0.0001671132 | 136.77 | 0.599 | -1.767 |
| 4738 | KTW | 654  | 0.0000365647 | 172.33 | 0.755 | -1.833 |
| 4739 | KTY | 1519 | 0.0000849264 | 161.93 | 0.710 | -1.967 |
| 4740 | KTV | 3543 | 0.0001980870 | 142.60 | 0.625 | -0.133 |
| 4741 | KWA | 558  | 0.0000311974 | 161.83 | 0.709 | -1.000 |
| 4742 | KWR | 609  | 0.0000340488 | 196.50 | 0.861 | -3.100 |
| 4743 | KWN | 491  | 0.0000274515 | 173.40 | 0.760 | -2.767 |
| 4744 | KWD | 466  | 0.0000260538 | 170.93 | 0.749 | -2.767 |
| 4745 | KWC | 263  | 0.0000147042 | 166.27 | 0.729 | -0.767 |
| 4746 | KWQ | 577  | 0.0000322597 | 181.63 | 0.796 | -2.767 |
| 4747 | KWE | 764  | 0.0000427148 | 179.23 | 0.785 | -2.767 |
| 4748 | KWG | 447  | 0.0000249915 | 153.47 | 0.673 | -1.733 |
| 4749 | KWH | 259  | 0.0000144805 | 185.17 | 0.811 | -2.667 |
| 4750 | KWI | 624  | 0.0000348875 | 186.47 | 0.817 | -0.100 |
| 4751 | KWL | 1052 | 0.0000588167 | 186.50 | 0.817 | -0.333 |
| 4752 | KWK | 842  | 0.0000470757 | 187.60 | 0.822 | -2.900 |
| 4753 | KWM | 344  | 0.0000192328 | 187.50 | 0.822 | -0.967 |
| 4754 | KWF | 442  | 0.0000247120 | 195.80 | 0.858 | -0.667 |
| 4755 | KWP | 407  | 0.0000227551 | 172.80 | 0.757 | -2.133 |
| 4756 | KWS | 848  | 0.0000474112 | 163.63 | 0.717 | -1.867 |
| 4757 | KWT | 576  | 0.0000322038 | 172.33 | 0.755 | -1.833 |
| 4758 | KWW | 163  | 0.0000091132 | 207.90 | 0.911 | -1.900 |
| 4759 | KWY | 354  | 0.0000197919 | 197.50 | 0.865 | -2.033 |
| 4760 | KWV | 705  | 0.0000394161 | 178.17 | 0.781 | -0.200 |
| 4761 | KYA | 1172 | 0.0000655258 | 151.43 | 0.664 | -1.133 |
| 4762 | KYR | 1508 | 0.0000843114 | 186.10 | 0.816 | -3.233 |
| 4763 | KYN | 1085 | 0.0000606617 | 163.00 | 0.714 | -2.900 |
| 4764 | KYD | 1180 | 0.0000659731 | 160.53 | 0.703 | -2.900 |
| 4765 | KYC | 588  | 0.0000328747 | 155.87 | 0.683 | -0.900 |
| 4766 | KYQ | 1251 | 0.0000699427 | 171.23 | 0.750 | -2.900 |
| 4767 | KYE | 1674 | 0.0000935923 | 168.83 | 0.740 | -2.900 |
| 4768 | KYG | 1726 | 0.0000964996 | 143.07 | 0.627 | -1.867 |
| 4769 | KYH | 652  | 0.0000364529 | 174.77 | 0.766 | -2.800 |
| 4770 | KYI | 1542 | 0.0000862123 | 176.07 | 0.772 | -0.233 |
| 4771 | KYL | 2780 | 0.0001554281 | 176.10 | 0.772 | -0.467 |
| 4772 | KYK | 1837 | 0.0001027056 | 177.20 | 0.777 | -3.033 |
| 4773 | KYM | 602  | 0.0000336575 | 177.10 | 0.776 | -1.100 |
| 4774 | KYF | 1324 | 0.0000740240 | 185.40 | 0.812 | -0.800 |
| 4775 | KYP | 1300 | 0.0000726822 | 162.40 | 0.712 | -2.267 |
| 4776 | KYS | 1955 | 0.0001093029 | 153.23 | 0.671 | -2.000 |
| 4777 | KYT | 1240 | 0.0000693277 | 161.93 | 0.710 | -1.967 |
| 4778 | KYW | 370  | 0.0000206865 | 197.50 | 0.865 | -2.033 |

|      |     |      |              |        |       |        |
|------|-----|------|--------------|--------|-------|--------|
| 4779 | KYY | 913  | 0.0000510453 | 187.10 | 0.820 | -2.167 |
| 4780 | KYV | 1417 | 0.0000792236 | 167.77 | 0.735 | -0.333 |
| 4781 | KVA | 3685 | 0.0002060261 | 132.10 | 0.579 | 0.700  |
| 4782 | KVR | 2857 | 0.0001597332 | 166.77 | 0.731 | -1.400 |
| 4783 | KVN | 2233 | 0.0001248457 | 143.67 | 0.630 | -1.067 |
| 4784 | KVD | 2610 | 0.0001459235 | 141.20 | 0.619 | -1.067 |
| 4785 | KVC | 1171 | 0.0000654699 | 136.53 | 0.598 | 0.933  |
| 4786 | KVQ | 2599 | 0.0001453085 | 151.90 | 0.666 | -1.067 |
| 4787 | KVE | 4069 | 0.0002274953 | 149.50 | 0.655 | -1.067 |
| 4788 | KVG | 2462 | 0.0001376489 | 123.73 | 0.542 | -0.033 |
| 4789 | KVH | 1545 | 0.0000863800 | 155.43 | 0.681 | -0.967 |
| 4790 | KVI | 3239 | 0.0001810906 | 156.73 | 0.687 | 1.600  |
| 4791 | KVL | 6717 | 0.0003755434 | 156.77 | 0.687 | 1.367  |
| 4792 | KVK | 4359 | 0.0002437091 | 157.87 | 0.692 | -1.200 |
| 4793 | KVM | 1201 | 0.0000671472 | 157.77 | 0.691 | 0.733  |
| 4794 | KVF | 3082 | 0.0001723128 | 166.07 | 0.728 | 1.033  |
| 4795 | KVP | 3130 | 0.0001749964 | 143.07 | 0.627 | -0.433 |
| 4796 | KVS | 4326 | 0.0002418641 | 133.90 | 0.587 | -0.167 |
| 4797 | KVT | 3684 | 0.0002059702 | 142.60 | 0.625 | -0.133 |
| 4798 | KVW | 838  | 0.0000468521 | 178.17 | 0.781 | -0.200 |
| 4799 | KVY | 1573 | 0.0000879455 | 167.77 | 0.735 | -0.333 |
| 4800 | KVV | 3881 | 0.0002169844 | 148.43 | 0.650 | 1.500  |
| 4801 | MAA | 4131 | 0.0002309617 | 115.67 | 0.507 | 1.833  |
| 4802 | MAR | 1744 | 0.0000975060 | 150.33 | 0.659 | -0.267 |
| 4803 | MAN | 1020 | 0.0000570276 | 127.23 | 0.558 | 0.067  |
| 4804 | MAD | 1548 | 0.0000865477 | 124.77 | 0.547 | 0.067  |
| 4805 | MAC | 649  | 0.0000362852 | 120.10 | 0.526 | 2.067  |
| 4806 | MAQ | 1508 | 0.0000843114 | 135.47 | 0.594 | 0.067  |
| 4807 | MAE | 2533 | 0.0001416185 | 133.07 | 0.583 | 0.067  |
| 4808 | MAG | 2220 | 0.0001241189 | 107.30 | 0.470 | 1.100  |
| 4809 | MAH | 776  | 0.0000433857 | 139.00 | 0.609 | 0.167  |
| 4810 | MAI | 1177 | 0.0000658054 | 140.30 | 0.615 | 2.733  |
| 4811 | MAL | 3171 | 0.0001772887 | 140.33 | 0.615 | 2.500  |
| 4812 | MAK | 1759 | 0.0000983446 | 141.43 | 0.620 | -0.067 |
| 4813 | MAM | 756  | 0.0000422675 | 141.33 | 0.619 | 1.867  |
| 4814 | MAF | 1228 | 0.0000686567 | 149.63 | 0.656 | 2.167  |
| 4815 | MAP | 1924 | 0.0001075697 | 126.63 | 0.555 | 0.700  |
| 4816 | MAS | 3192 | 0.0001784628 | 117.47 | 0.515 | 0.967  |
| 4817 | MAT | 2151 | 0.0001202611 | 126.17 | 0.553 | 1.000  |
| 4818 | MAW | 332  | 0.0000185619 | 161.73 | 0.709 | 0.933  |
| 4819 | MAY | 1010 | 0.0000564685 | 151.33 | 0.663 | 0.800  |
| 4820 | MAV | 2239 | 0.0001251811 | 132.00 | 0.578 | 2.633  |
| 4821 | MRA | 1354 | 0.0000757013 | 150.33 | 0.659 | -0.267 |
| 4822 | MRR | 1606 | 0.0000897905 | 185.00 | 0.811 | -2.367 |
| 4823 | MRN | 766  | 0.0000428266 | 161.90 | 0.709 | -2.033 |
| 4824 | MRD | 809  | 0.0000452307 | 159.43 | 0.699 | -2.033 |
| 4825 | MRC | 362  | 0.0000202392 | 154.77 | 0.678 | -0.033 |
| 4826 | MRQ | 886  | 0.0000495357 | 170.13 | 0.746 | -2.033 |
| 4827 | MRE | 1487 | 0.0000831373 | 167.73 | 0.735 | -2.033 |
| 4828 | MRG | 1117 | 0.0000624508 | 141.97 | 0.622 | -1.000 |
| 4829 | MRH | 506  | 0.0000282902 | 173.67 | 0.761 | -1.933 |
| 4830 | MRI | 788  | 0.0000440566 | 174.97 | 0.767 | 0.633  |

|      |     |      |              |        |       |        |
|------|-----|------|--------------|--------|-------|--------|
| 4831 | MRL | 1756 | 0.0000981769 | 175.00 | 0.767 | 0.400  |
| 4832 | MRK | 1470 | 0.0000821868 | 176.10 | 0.772 | -2.167 |
| 4833 | MRM | 418  | 0.0000233701 | 176.00 | 0.771 | -0.233 |
| 4834 | MRF | 574  | 0.0000320920 | 184.30 | 0.808 | 0.067  |
| 4835 | MRP | 1061 | 0.0000593199 | 161.30 | 0.707 | -1.400 |
| 4836 | MRS | 1335 | 0.0000746391 | 152.13 | 0.667 | -1.133 |
| 4837 | MRT | 996  | 0.0000556858 | 160.83 | 0.705 | -1.100 |
| 4838 | MRW | 272  | 0.0000152074 | 196.40 | 0.861 | -1.167 |
| 4839 | MRY | 344  | 0.0000192328 | 186.00 | 0.815 | -1.300 |
| 4840 | MRV | 1089 | 0.0000608853 | 166.67 | 0.730 | 0.533  |
| 4841 | MNA | 871  | 0.0000486971 | 127.23 | 0.558 | 0.067  |
| 4842 | MNR | 911  | 0.0000509335 | 161.90 | 0.709 | -2.033 |
| 4843 | MNN | 606  | 0.0000338811 | 138.80 | 0.608 | -1.700 |
| 4844 | MND | 626  | 0.0000349993 | 136.33 | 0.597 | -1.700 |
| 4845 | MNC | 283  | 0.0000158224 | 131.67 | 0.577 | 0.300  |
| 4846 | MNQ | 684  | 0.0000382420 | 147.03 | 0.644 | -1.700 |
| 4847 | MNE | 1000 | 0.0000559094 | 144.63 | 0.634 | -1.700 |
| 4848 | MNG | 1077 | 0.0000602144 | 118.87 | 0.521 | -0.667 |
| 4849 | MNH | 471  | 0.0000263333 | 150.57 | 0.660 | -1.600 |
| 4850 | MNI | 880  | 0.0000492003 | 151.87 | 0.665 | 0.967  |
| 4851 | MNL | 1336 | 0.0000746950 | 151.90 | 0.666 | 0.733  |
| 4852 | MNK | 938  | 0.0000524430 | 153.00 | 0.670 | -1.833 |
| 4853 | MNM | 385  | 0.0000215251 | 152.90 | 0.670 | 0.100  |
| 4854 | MNF | 580  | 0.0000324275 | 161.20 | 0.706 | 0.400  |
| 4855 | MNP | 967  | 0.0000540644 | 138.20 | 0.606 | -1.067 |
| 4856 | MNS | 1410 | 0.0000788323 | 129.03 | 0.565 | -0.800 |
| 4857 | MNT | 819  | 0.0000457898 | 137.73 | 0.604 | -0.767 |
| 4858 | MNW | 185  | 0.0000103432 | 173.30 | 0.759 | -0.833 |
| 4859 | MNY | 451  | 0.0000252151 | 162.90 | 0.714 | -0.967 |
| 4860 | MNV | 868  | 0.0000485294 | 143.57 | 0.629 | 0.867  |
| 4861 | MDA | 1360 | 0.0000760368 | 124.77 | 0.547 | 0.067  |
| 4862 | MDR | 1158 | 0.0000647431 | 159.43 | 0.699 | -2.033 |
| 4863 | MDN | 797  | 0.0000445598 | 136.33 | 0.597 | -1.700 |
| 4864 | MDD | 1161 | 0.0000649108 | 133.87 | 0.587 | -1.700 |
| 4865 | MDC | 402  | 0.0000224756 | 129.20 | 0.566 | 0.300  |
| 4866 | MDQ | 874  | 0.0000488648 | 144.57 | 0.634 | -1.700 |
| 4867 | MDE | 1585 | 0.0000886164 | 142.17 | 0.623 | -1.700 |
| 4868 | MDG | 1251 | 0.0000699427 | 116.40 | 0.510 | -0.667 |
| 4869 | MDH | 515  | 0.0000287933 | 148.10 | 0.649 | -1.600 |
| 4870 | MDI | 1047 | 0.0000585371 | 149.40 | 0.655 | 0.967  |
| 4871 | MDL | 2117 | 0.0001183602 | 149.43 | 0.655 | 0.733  |
| 4872 | MDK | 1104 | 0.0000617240 | 150.53 | 0.660 | -1.833 |
| 4873 | MDM | 463  | 0.0000258861 | 150.43 | 0.659 | 0.100  |
| 4874 | MDF | 916  | 0.0000512130 | 158.73 | 0.696 | 0.400  |
| 4875 | MDP | 1351 | 0.0000755336 | 135.73 | 0.595 | -1.067 |
| 4876 | MDS | 1863 | 0.0001041592 | 126.57 | 0.555 | -0.800 |
| 4877 | MDT | 1251 | 0.0000699427 | 135.27 | 0.593 | -0.767 |
| 4878 | MDW | 267  | 0.0000149278 | 170.83 | 0.749 | -0.833 |
| 4879 | MDY | 607  | 0.0000339370 | 160.43 | 0.703 | -0.967 |
| 4880 | MDV | 1279 | 0.0000715081 | 141.10 | 0.618 | 0.867  |
| 4881 | MCA | 345  | 0.0000192887 | 120.10 | 0.526 | 2.067  |
| 4882 | MCR | 429  | 0.0000239851 | 154.77 | 0.678 | -0.033 |

|      |     |      |              |        |       |        |
|------|-----|------|--------------|--------|-------|--------|
| 4883 | MCN | 306  | 0.0000171083 | 131.67 | 0.577 | 0.300  |
| 4884 | MCD | 325  | 0.0000181706 | 129.20 | 0.566 | 0.300  |
| 4885 | MCC | 193  | 0.0000107905 | 124.53 | 0.546 | 2.300  |
| 4886 | MCQ | 356  | 0.0000199037 | 139.90 | 0.613 | 0.300  |
| 4887 | MCE | 432  | 0.0000241529 | 137.50 | 0.603 | 0.300  |
| 4888 | MCG | 450  | 0.0000251592 | 111.73 | 0.490 | 1.333  |
| 4889 | MCH | 257  | 0.0000143687 | 143.43 | 0.629 | 0.400  |
| 4890 | MCI | 546  | 0.0000305265 | 144.73 | 0.634 | 2.967  |
| 4891 | MCL | 628  | 0.0000351111 | 144.77 | 0.634 | 2.733  |
| 4892 | MCK | 433  | 0.0000242088 | 145.87 | 0.639 | 0.167  |
| 4893 | MCM | 146  | 0.0000081628 | 145.77 | 0.639 | 2.100  |
| 4894 | MCF | 288  | 0.0000161019 | 154.07 | 0.675 | 2.400  |
| 4895 | MCP | 409  | 0.0000228669 | 131.07 | 0.574 | 0.933  |
| 4896 | MCS | 632  | 0.0000353347 | 121.90 | 0.534 | 1.200  |
| 4897 | MCT | 372  | 0.0000207983 | 130.60 | 0.572 | 1.233  |
| 4898 | MCW | 101  | 0.0000056468 | 166.17 | 0.728 | 1.167  |
| 4899 | MCY | 184  | 0.0000102873 | 155.77 | 0.683 | 1.033  |
| 4900 | MCV | 532  | 0.0000297438 | 136.43 | 0.598 | 2.867  |
| 4901 | MQA | 1181 | 0.0000660290 | 135.47 | 0.594 | 0.067  |
| 4902 | MQR | 1057 | 0.0000590962 | 170.13 | 0.746 | -2.033 |
| 4903 | MQN | 734  | 0.0000410375 | 147.03 | 0.644 | -1.700 |
| 4904 | MQD | 878  | 0.0000490885 | 144.57 | 0.634 | -1.700 |
| 4905 | MQC | 278  | 0.0000155428 | 139.90 | 0.613 | 0.300  |
| 4906 | MQQ | 1045 | 0.0000584253 | 155.27 | 0.680 | -1.700 |
| 4907 | MQE | 1385 | 0.0000774345 | 152.87 | 0.670 | -1.700 |
| 4908 | MQG | 887  | 0.0000495916 | 127.10 | 0.557 | -0.667 |
| 4909 | MQH | 430  | 0.0000240410 | 158.80 | 0.696 | -1.600 |
| 4910 | MQI | 620  | 0.0000346638 | 160.10 | 0.702 | 0.967  |
| 4911 | SQL | 1571 | 0.0000878337 | 160.13 | 0.702 | 0.733  |
| 4912 | MQK | 1133 | 0.0000633454 | 161.23 | 0.707 | -1.833 |
| 4913 | MQM | 343  | 0.0000191769 | 161.13 | 0.706 | 0.100  |
| 4914 | MQF | 432  | 0.0000241529 | 169.43 | 0.742 | 0.400  |
| 4915 | MQP | 905  | 0.0000505980 | 146.43 | 0.642 | -1.067 |
| 4916 | MQS | 1111 | 0.0000621153 | 137.27 | 0.602 | -0.800 |
| 4917 | MQT | 866  | 0.0000484175 | 145.97 | 0.640 | -0.767 |
| 4918 | MQW | 188  | 0.0000105110 | 181.53 | 0.796 | -0.833 |
| 4919 | MQY | 305  | 0.0000170524 | 171.13 | 0.750 | -0.967 |
| 4920 | MQV | 921  | 0.0000514926 | 151.80 | 0.665 | 0.867  |
| 4921 | MEA | 2268 | 0.0001268025 | 133.07 | 0.583 | 0.067  |
| 4922 | MER | 1825 | 0.0001020347 | 167.73 | 0.735 | -2.033 |
| 4923 | MEN | 1613 | 0.0000901819 | 144.63 | 0.634 | -1.700 |
| 4924 | MED | 1751 | 0.0000978974 | 142.17 | 0.623 | -1.700 |
| 4925 | MEC | 515  | 0.0000287933 | 137.50 | 0.603 | 0.300  |
| 4926 | MEQ | 1565 | 0.0000874982 | 152.87 | 0.670 | -1.700 |
| 4927 | MEE | 3358 | 0.0001877438 | 150.47 | 0.659 | -1.700 |
| 4928 | MEG | 1751 | 0.0000978974 | 124.70 | 0.546 | -0.667 |
| 4929 | MEH | 771  | 0.0000431061 | 156.40 | 0.685 | -1.600 |
| 4930 | MEI | 1292 | 0.0000722349 | 157.70 | 0.691 | 0.967  |
| 4931 | MEL | 2708 | 0.0001514027 | 157.73 | 0.691 | 0.733  |
| 4932 | MEK | 2573 | 0.0001438549 | 158.83 | 0.696 | -1.833 |
| 4933 | MEM | 783  | 0.0000437771 | 158.73 | 0.696 | 0.100  |
| 4934 | MEF | 820  | 0.0000458457 | 167.03 | 0.732 | 0.400  |

|      |     |      |              |        |       |        |
|------|-----|------|--------------|--------|-------|--------|
| 4935 | MEP | 1456 | 0.0000814041 | 144.03 | 0.631 | -1.067 |
| 4936 | MES | 2220 | 0.0001241189 | 134.87 | 0.591 | -0.800 |
| 4937 | MET | 1916 | 0.0001071224 | 143.57 | 0.629 | -0.767 |
| 4938 | MEW | 311  | 0.0000173878 | 179.13 | 0.785 | -0.833 |
| 4939 | MEY | 807  | 0.0000451189 | 168.73 | 0.739 | -0.967 |
| 4940 | MEV | 1853 | 0.0001036001 | 149.40 | 0.655 | 0.867  |
| 4941 | MGA | 1428 | 0.0000798386 | 107.30 | 0.470 | 1.100  |
| 4942 | MGR | 1382 | 0.0000772668 | 141.97 | 0.622 | -1.000 |
| 4943 | MGN | 1013 | 0.0000566362 | 118.87 | 0.521 | -0.667 |
| 4944 | MGD | 981  | 0.0000548471 | 116.40 | 0.510 | -0.667 |
| 4945 | MGC | 518  | 0.0000289611 | 111.73 | 0.490 | 1.333  |
| 4946 | MGQ | 962  | 0.0000537848 | 127.10 | 0.557 | -0.667 |
| 4947 | MGE | 1169 | 0.0000653581 | 124.70 | 0.546 | -0.667 |
| 4948 | MGG | 1515 | 0.0000847027 | 98.93  | 0.434 | 0.367  |
| 4949 | MGH | 655  | 0.0000366207 | 130.63 | 0.572 | -0.567 |
| 4950 | MGI | 1275 | 0.0000712845 | 131.93 | 0.578 | 2.000  |
| 4951 | MGL | 2285 | 0.0001277530 | 131.97 | 0.578 | 1.767  |
| 4952 | MGK | 1405 | 0.0000785527 | 133.07 | 0.583 | -0.800 |
| 4953 | MGM | 616  | 0.0000344402 | 132.97 | 0.583 | 1.133  |
| 4954 | MGF | 977  | 0.0000546235 | 141.27 | 0.619 | 1.433  |
| 4955 | MGP | 1711 | 0.0000956610 | 118.27 | 0.518 | -0.033 |
| 4956 | MGS | 2133 | 0.0001192547 | 109.10 | 0.478 | 0.233  |
| 4957 | MGT | 1399 | 0.0000782173 | 117.80 | 0.516 | 0.267  |
| 4958 | MGW | 288  | 0.0000161019 | 153.37 | 0.672 | 0.200  |
| 4959 | MGY | 746  | 0.0000417084 | 142.97 | 0.626 | 0.067  |
| 4960 | MGV | 1254 | 0.0000701104 | 123.63 | 0.542 | 1.900  |
| 4961 | MHA | 459  | 0.0000256624 | 139.00 | 0.609 | 0.167  |
| 4962 | MHR | 525  | 0.0000293524 | 173.67 | 0.761 | -1.933 |
| 4963 | MHN | 315  | 0.0000176115 | 150.57 | 0.660 | -1.600 |
| 4964 | MHD | 257  | 0.0000143687 | 148.10 | 0.649 | -1.600 |
| 4965 | MHC | 198  | 0.0000110701 | 143.43 | 0.629 | 0.400  |
| 4966 | MHQ | 449  | 0.0000251033 | 158.80 | 0.696 | -1.600 |
| 4967 | MHE | 415  | 0.0000232024 | 156.40 | 0.685 | -1.600 |
| 4968 | MHG | 476  | 0.0000266129 | 130.63 | 0.572 | -0.567 |
| 4969 | MHH | 292  | 0.0000163255 | 162.33 | 0.711 | -1.500 |
| 4970 | MHI | 387  | 0.0000216369 | 163.63 | 0.717 | 1.067  |
| 4971 | MHL | 808  | 0.0000451748 | 163.67 | 0.717 | 0.833  |
| 4972 | MHK | 474  | 0.0000265011 | 164.77 | 0.722 | -1.733 |
| 4973 | MHM | 193  | 0.0000107905 | 164.67 | 0.722 | 0.200  |
| 4974 | MHF | 348  | 0.0000194565 | 172.97 | 0.758 | 0.500  |
| 4975 | MHP | 521  | 0.0000291288 | 149.97 | 0.657 | -0.967 |
| 4976 | MHS | 752  | 0.0000420439 | 140.80 | 0.617 | -0.700 |
| 4977 | MHT | 574  | 0.0000320920 | 149.50 | 0.655 | -0.667 |
| 4978 | MHW | 129  | 0.0000072123 | 185.07 | 0.811 | -0.733 |
| 4979 | MHY | 275  | 0.0000153751 | 174.67 | 0.765 | -0.867 |
| 4980 | MHV | 429  | 0.0000239851 | 155.33 | 0.681 | 0.967  |
| 4981 | MIA | 873  | 0.0000488089 | 140.30 | 0.615 | 2.733  |
| 4982 | MIR | 792  | 0.0000442802 | 174.97 | 0.767 | 0.633  |
| 4983 | MIN | 556  | 0.0000310856 | 151.87 | 0.665 | 0.967  |
| 4984 | MID | 743  | 0.0000415407 | 149.40 | 0.655 | 0.967  |
| 4985 | MIC | 310  | 0.0000173319 | 144.73 | 0.634 | 2.967  |
| 4986 | MIQ | 803  | 0.0000448952 | 160.10 | 0.702 | 0.967  |



|      |     |      |              |        |       |        |
|------|-----|------|--------------|--------|-------|--------|
| 4987 | MIE | 810  | 0.0000452866 | 157.70 | 0.691 | 0.967  |
| 4988 | MIG | 837  | 0.0000467962 | 131.93 | 0.578 | 2.000  |
| 4989 | MIH | 398  | 0.0000222519 | 163.63 | 0.717 | 1.067  |
| 4990 | MII | 683  | 0.0000381861 | 164.93 | 0.723 | 3.633  |
| 4991 | MIL | 1496 | 0.0000836405 | 164.97 | 0.723 | 3.400  |
| 4992 | MIK | 787  | 0.0000440007 | 166.07 | 0.728 | 0.833  |
| 4993 | MIM | 317  | 0.0000177233 | 165.97 | 0.727 | 2.767  |
| 4994 | MIF | 620  | 0.0000346638 | 174.27 | 0.764 | 3.067  |
| 4995 | MIP | 783  | 0.0000437771 | 151.27 | 0.663 | 1.600  |
| 4996 | MIS | 1138 | 0.0000636249 | 142.10 | 0.623 | 1.867  |
| 4997 | MIT | 823  | 0.0000460134 | 150.80 | 0.661 | 1.900  |
| 4998 | MIW | 203  | 0.0000113496 | 186.37 | 0.817 | 1.833  |
| 4999 | MIY | 401  | 0.0000224197 | 175.97 | 0.771 | 1.700  |
| 5000 | MIV | 793  | 0.0000443362 | 156.63 | 0.686 | 3.533  |
| 5001 | MLA | 2453 | 0.0001371458 | 140.33 | 0.615 | 2.500  |
| 5002 | MLR | 2206 | 0.0001233361 | 175.00 | 0.767 | 0.400  |
| 5003 | MLN | 1392 | 0.0000778259 | 151.90 | 0.666 | 0.733  |
| 5004 | MLD | 1595 | 0.0000891755 | 149.43 | 0.655 | 0.733  |
| 5005 | MLC | 782  | 0.0000437211 | 144.77 | 0.634 | 2.733  |
| 5006 | MLQ | 2035 | 0.0001137756 | 160.13 | 0.702 | 0.733  |
| 5007 | MLE | 2720 | 0.0001520736 | 157.73 | 0.691 | 0.733  |
| 5008 | MLG | 2005 | 0.0001120983 | 131.97 | 0.578 | 1.767  |
| 5009 | MLH | 795  | 0.0000444480 | 163.67 | 0.717 | 0.833  |
| 5010 | MLI | 1233 | 0.0000689363 | 164.97 | 0.723 | 3.400  |
| 5011 | MLL | 3832 | 0.0002142448 | 165.00 | 0.723 | 3.167  |
| 5012 | MLK | 2092 | 0.0001169625 | 166.10 | 0.728 | 0.600  |
| 5013 | MLM | 744  | 0.0000415966 | 166.00 | 0.727 | 2.533  |
| 5014 | MLF | 1159 | 0.0000647990 | 174.30 | 0.764 | 2.833  |
| 5015 | MLP | 1792 | 0.0001001896 | 151.30 | 0.663 | 1.367  |
| 5016 | MLS | 2761 | 0.0001543659 | 142.13 | 0.623 | 1.633  |
| 5017 | MLT | 1788 | 0.0000999660 | 150.83 | 0.661 | 1.667  |
| 5018 | MLW | 375  | 0.0000209660 | 186.40 | 0.817 | 1.600  |
| 5019 | MLY | 837  | 0.0000467962 | 176.00 | 0.771 | 1.467  |
| 5020 | MLV | 1979 | 0.0001106447 | 156.67 | 0.687 | 3.300  |
| 5021 | MKA | 1650 | 0.0000922505 | 141.43 | 0.620 | -0.067 |
| 5022 | MKR | 1504 | 0.0000840877 | 176.10 | 0.772 | -2.167 |
| 5023 | MKN | 1164 | 0.0000650785 | 153.00 | 0.670 | -1.833 |
| 5024 | MKD | 1331 | 0.0000744154 | 150.53 | 0.660 | -1.833 |
| 5025 | MKC | 447  | 0.0000249915 | 145.87 | 0.639 | 0.167  |
| 5026 | MKQ | 1096 | 0.0000612767 | 161.23 | 0.707 | -1.833 |
| 5027 | MKE | 2284 | 0.0001276971 | 158.83 | 0.696 | -1.833 |
| 5028 | MKG | 1308 | 0.0000731295 | 133.07 | 0.583 | -0.800 |
| 5029 | MKH | 710  | 0.0000396957 | 164.77 | 0.722 | -1.733 |
| 5030 | MKI | 1091 | 0.0000609972 | 166.07 | 0.728 | 0.833  |
| 5031 | MKL | 2203 | 0.0001231684 | 166.10 | 0.728 | 0.600  |
| 5032 | MKK | 2211 | 0.0001236157 | 167.20 | 0.733 | -1.967 |
| 5033 | MKM | 703  | 0.0000393043 | 167.10 | 0.732 | -0.033 |
| 5034 | MKF | 686  | 0.0000383538 | 175.40 | 0.769 | 0.267  |
| 5035 | MKP | 990  | 0.0000553503 | 152.40 | 0.668 | -1.200 |
| 5036 | MKS | 1637 | 0.0000915237 | 143.23 | 0.628 | -0.933 |
| 5037 | MKT | 1563 | 0.0000873864 | 151.93 | 0.666 | -0.900 |
| 5038 | MKW | 282  | 0.0000157665 | 187.50 | 0.822 | -0.967 |

|      |     |      |              |        |       |        |
|------|-----|------|--------------|--------|-------|--------|
| 5039 | MKY | 583  | 0.0000325952 | 177.10 | 0.776 | -1.100 |
| 5040 | MKV | 1402 | 0.0000783850 | 157.77 | 0.691 | 0.733  |
| 5041 | MMA | 674  | 0.0000376829 | 141.33 | 0.619 | 1.867  |
| 5042 | MMR | 441  | 0.0000246560 | 176.00 | 0.771 | -0.233 |
| 5043 | MMN | 391  | 0.0000218606 | 152.90 | 0.670 | 0.100  |
| 5044 | MMD | 499  | 0.0000278988 | 150.43 | 0.659 | 0.100  |
| 5045 | MMC | 174  | 0.0000097282 | 145.77 | 0.639 | 2.100  |
| 5046 | MMQ | 479  | 0.0000267806 | 161.13 | 0.706 | 0.100  |
| 5047 | MME | 722  | 0.0000403666 | 158.73 | 0.696 | 0.100  |
| 5048 | MMG | 637  | 0.0000356143 | 132.97 | 0.583 | 1.133  |
| 5049 | MMH | 223  | 0.0000124678 | 164.67 | 0.722 | 0.200  |
| 5050 | MMI | 319  | 0.0000178351 | 165.97 | 0.727 | 2.767  |
| 5051 | MML | 730  | 0.0000408139 | 166.00 | 0.727 | 2.533  |
| 5052 | MMK | 596  | 0.0000333220 | 167.10 | 0.732 | -0.033 |
| 5053 | MMM | 275  | 0.0000153751 | 167.00 | 0.732 | 1.900  |
| 5054 | MMF | 308  | 0.0000172201 | 175.30 | 0.768 | 2.200  |
| 5055 | MMP | 512  | 0.0000286256 | 152.30 | 0.667 | 0.733  |
| 5056 | MMS | 743  | 0.0000415407 | 143.13 | 0.627 | 1.000  |
| 5057 | MMT | 465  | 0.0000259979 | 151.83 | 0.665 | 1.033  |
| 5058 | MMW | 96   | 0.0000053673 | 187.40 | 0.821 | 0.967  |
| 5059 | MMY | 242  | 0.0000135301 | 177.00 | 0.776 | 0.833  |
| 5060 | MMV | 533  | 0.0000297997 | 157.67 | 0.691 | 2.667  |
| 5061 | MFA | 708  | 0.0000395839 | 149.63 | 0.656 | 2.167  |
| 5062 | MFR | 704  | 0.0000393602 | 184.30 | 0.808 | 0.067  |
| 5063 | MFN | 533  | 0.0000297997 | 161.20 | 0.706 | 0.400  |
| 5064 | MGD | 640  | 0.0000357820 | 158.73 | 0.696 | 0.400  |
| 5065 | MFC | 345  | 0.0000192887 | 154.07 | 0.675 | 2.400  |
| 5066 | MFQ | 579  | 0.0000323715 | 169.43 | 0.742 | 0.400  |
| 5067 | MFE | 830  | 0.0000464048 | 167.03 | 0.732 | 0.400  |
| 5068 | MFG | 726  | 0.0000405902 | 141.27 | 0.619 | 1.433  |
| 5069 | MFH | 342  | 0.0000191210 | 172.97 | 0.758 | 0.500  |
| 5070 | RFI | 573  | 0.0000320361 | 174.27 | 0.764 | 3.067  |
| 5071 | MFL | 1249 | 0.0000698308 | 174.30 | 0.764 | 2.833  |
| 5072 | RFK | 534  | 0.0000298556 | 175.40 | 0.769 | 0.267  |
| 5073 | RFM | 255  | 0.0000142569 | 175.30 | 0.768 | 2.200  |
| 5074 | RFJ | 497  | 0.0000277870 | 183.60 | 0.805 | 2.500  |
| 5075 | RFJ | 746  | 0.0000417084 | 160.60 | 0.704 | 1.033  |
| 5076 | RFJ | 1126 | 0.0000629540 | 151.43 | 0.664 | 1.300  |
| 5077 | RFJ | 695  | 0.0000388570 | 160.13 | 0.702 | 1.333  |
| 5078 | RFJ | 162  | 0.0000090573 | 195.70 | 0.858 | 1.267  |
| 5079 | RFJ | 351  | 0.0000196242 | 185.30 | 0.812 | 1.133  |
| 5080 | RFJ | 737  | 0.0000412052 | 165.97 | 0.727 | 2.967  |
| 5081 | MPA | 1407 | 0.0000786645 | 126.63 | 0.555 | 0.700  |
| 5082 | MPR | 1085 | 0.0000606617 | 161.30 | 0.707 | -1.400 |
| 5083 | MPN | 641  | 0.0000358379 | 138.20 | 0.606 | -1.067 |
| 5084 | MPD | 754  | 0.0000421557 | 135.73 | 0.595 | -1.067 |
| 5085 | MPC | 343  | 0.0000191769 | 131.07 | 0.574 | 0.933  |
| 5086 | MPQ | 869  | 0.0000485853 | 146.43 | 0.642 | -1.067 |
| 5087 | MPE | 1283 | 0.0000717318 | 144.03 | 0.631 | -1.067 |
| 5088 | MPG | 1744 | 0.0000975060 | 118.27 | 0.518 | -0.033 |
| 5089 | MPH | 498  | 0.0000278429 | 149.97 | 0.657 | -0.967 |
| 5090 | MPI | 631  | 0.0000352788 | 151.27 | 0.663 | 1.600  |

|      |     |      |              |        |       |        |
|------|-----|------|--------------|--------|-------|--------|
| 5091 | MPL | 1684 | 0.0000941514 | 151.30 | 0.663 | 1.367  |
| 5092 | MPK | 1039 | 0.0000580899 | 152.40 | 0.668 | -1.200 |
| 5093 | MPM | 365  | 0.0000204069 | 152.30 | 0.667 | 0.733  |
| 5094 | MPF | 719  | 0.0000401989 | 160.60 | 0.704 | 1.033  |
| 5095 | MPP | 1800 | 0.0001006369 | 137.60 | 0.603 | -0.433 |
| 5096 | MPS | 1865 | 0.0001042710 | 128.43 | 0.563 | -0.167 |
| 5097 | MPT | 1157 | 0.0000646872 | 137.13 | 0.601 | -0.133 |
| 5098 | MPW | 258  | 0.0000144246 | 172.70 | 0.757 | -0.200 |
| 5099 | MPY | 555  | 0.0000310297 | 162.30 | 0.711 | -0.333 |
| 5100 | MPV | 1313 | 0.0000734090 | 142.97 | 0.626 | 1.500  |
| 5101 | MSA | 1866 | 0.0001043269 | 117.47 | 0.515 | 0.967  |
| 5102 | MSR | 1487 | 0.0000831373 | 152.13 | 0.667 | -1.133 |
| 5103 | MSN | 879  | 0.0000491444 | 129.03 | 0.565 | -0.800 |
| 5104 | MSD | 1268 | 0.0000708931 | 126.57 | 0.555 | -0.800 |
| 5105 | MSC | 566  | 0.0000316447 | 121.90 | 0.534 | 1.200  |
| 5106 | MSQ | 1304 | 0.0000729059 | 137.27 | 0.602 | -0.800 |
| 5107 | MSE | 1834 | 0.0001025378 | 134.87 | 0.591 | -0.800 |
| 5108 | MSG | 1791 | 0.0001001337 | 109.10 | 0.478 | 0.233  |
| 5109 | MSH | 727  | 0.0000406461 | 140.80 | 0.617 | -0.700 |
| 5110 | MSI | 1045 | 0.0000584253 | 142.10 | 0.623 | 1.867  |
| 5111 | MSL | 2704 | 0.0001511790 | 142.13 | 0.623 | 1.633  |
| 5112 | MSK | 1412 | 0.0000789441 | 143.23 | 0.628 | -0.933 |
| 5113 | MSM | 607  | 0.0000339370 | 143.13 | 0.627 | 1.000  |
| 5114 | MSF | 1007 | 0.0000563008 | 151.43 | 0.664 | 1.300  |
| 5115 | MSP | 1828 | 0.0001022024 | 128.43 | 0.563 | -0.167 |
| 5116 | MSS | 3099 | 0.0001732632 | 119.27 | 0.523 | 0.100  |
| 5117 | MST | 1571 | 0.0000878337 | 127.97 | 0.561 | 0.133  |
| 5118 | MSW | 403  | 0.0000225315 | 163.53 | 0.717 | 0.067  |
| 5119 | MSY | 741  | 0.0000414289 | 153.13 | 0.671 | -0.067 |
| 5120 | MSV | 1702 | 0.0000951578 | 133.80 | 0.586 | 1.767  |
| 5121 | MTA | 1428 | 0.0000798386 | 126.17 | 0.553 | 1.000  |
| 5122 | MTR | 935  | 0.0000522753 | 160.83 | 0.705 | -1.100 |
| 5123 | MTN | 659  | 0.0000368443 | 137.73 | 0.604 | -0.767 |
| 5124 | MTD | 973  | 0.0000543998 | 135.27 | 0.593 | -0.767 |
| 5125 | MTC | 431  | 0.0000240970 | 130.60 | 0.572 | 1.233  |
| 5126 | MTQ | 928  | 0.0000518839 | 145.97 | 0.640 | -0.767 |
| 5127 | MTE | 1308 | 0.0000731295 | 143.57 | 0.629 | -0.767 |
| 5128 | MTG | 1053 | 0.0000588726 | 117.80 | 0.516 | 0.267  |
| 5129 | MTH | 524  | 0.0000292965 | 149.50 | 0.655 | -0.667 |
| 5130 | MTI | 821  | 0.0000459016 | 150.80 | 0.661 | 1.900  |
| 5131 | MTL | 1794 | 0.0001003015 | 150.83 | 0.661 | 1.667  |
| 5132 | MTK | 1010 | 0.0000564685 | 151.93 | 0.666 | -0.900 |
| 5133 | MTM | 434  | 0.0000242647 | 151.83 | 0.665 | 1.033  |
| 5134 | MTF | 830  | 0.0000464048 | 160.13 | 0.702 | 1.333  |
| 5135 | MTP | 1412 | 0.0000789441 | 137.13 | 0.601 | -0.133 |
| 5136 | MTS | 1785 | 0.0000997983 | 127.97 | 0.561 | 0.133  |
| 5137 | MTT | 1319 | 0.0000737445 | 136.67 | 0.599 | 0.167  |
| 5138 | MTW | 219  | 0.0000122442 | 172.23 | 0.755 | 0.100  |
| 5139 | MTY | 489  | 0.0000273397 | 161.83 | 0.709 | -0.033 |
| 5140 | MTV | 1399 | 0.0000782173 | 142.50 | 0.624 | 1.800  |
| 5141 | MWA | 325  | 0.0000181706 | 161.73 | 0.709 | 0.933  |
| 5142 | MWR | 342  | 0.0000191210 | 196.40 | 0.861 | -1.167 |

|      |     |      |              |        |       |        |
|------|-----|------|--------------|--------|-------|--------|
| 5143 | MWN | 216  | 0.0000120764 | 173.30 | 0.759 | -0.833 |
| 5144 | MWD | 224  | 0.0000125237 | 170.83 | 0.749 | -0.833 |
| 5145 | MWC | 59   | 0.0000032987 | 166.17 | 0.728 | 1.167  |
| 5146 | MWQ | 197  | 0.0000110142 | 181.53 | 0.796 | -0.833 |
| 5147 | MWE | 359  | 0.0000200715 | 179.13 | 0.785 | -0.833 |
| 5148 | MWG | 253  | 0.0000141451 | 153.37 | 0.672 | 0.200  |
| 5149 | MWH | 128  | 0.0000071564 | 185.07 | 0.811 | -0.733 |
| 5150 | MWI | 202  | 0.0000112937 | 186.37 | 0.817 | 1.833  |
| 5151 | MWL | 436  | 0.0000243765 | 186.40 | 0.817 | 1.600  |
| 5152 | MWK | 289  | 0.0000161578 | 187.50 | 0.822 | -0.967 |
| 5153 | MWM | 85   | 0.0000047523 | 187.40 | 0.821 | 0.967  |
| 5154 | MWF | 146  | 0.0000081628 | 195.70 | 0.858 | 1.267  |
| 5155 | MWP | 199  | 0.0000111260 | 172.70 | 0.757 | -0.200 |
| 5156 | MWS | 426  | 0.0000238174 | 163.53 | 0.717 | 0.067  |
| 5157 | MWT | 241  | 0.0000134742 | 172.23 | 0.755 | 0.100  |
| 5158 | MWW | 43   | 0.0000024041 | 207.80 | 0.911 | 0.033  |
| 5159 | MWY | 114  | 0.0000063737 | 197.40 | 0.865 | -0.100 |
| 5160 | MWV | 224  | 0.0000125237 | 178.07 | 0.780 | 1.733  |
| 5161 | MYA | 567  | 0.0000317006 | 151.33 | 0.663 | 0.800  |
| 5162 | MYR | 575  | 0.0000321479 | 186.00 | 0.815 | -1.300 |
| 5163 | MYN | 388  | 0.0000216928 | 162.90 | 0.714 | -0.967 |
| 5164 | MYD | 446  | 0.0000249356 | 160.43 | 0.703 | -0.967 |
| 5165 | MYC | 191  | 0.0000106787 | 155.77 | 0.683 | 1.033  |
| 5166 | MYQ | 488  | 0.0000272838 | 171.13 | 0.750 | -0.967 |
| 5167 | MYE | 527  | 0.0000294643 | 168.73 | 0.739 | -0.967 |
| 5168 | MYG | 610  | 0.0000341047 | 142.97 | 0.626 | 0.067  |
| 5169 | MYH | 267  | 0.0000149278 | 174.67 | 0.765 | -0.867 |
| 5170 | MYI | 640  | 0.0000357820 | 175.97 | 0.771 | 1.700  |
| 5171 | MYL | 973  | 0.0000543998 | 176.00 | 0.771 | 1.467  |
| 5172 | MYK | 421  | 0.0000235379 | 177.10 | 0.776 | -1.100 |
| 5173 | MYM | 187  | 0.0000104551 | 177.00 | 0.776 | 0.833  |
| 5174 | MYF | 688  | 0.0000384657 | 185.30 | 0.812 | 1.133  |
| 5175 | MYP | 514  | 0.0000287374 | 162.30 | 0.711 | -0.333 |
| 5176 | MYS | 868  | 0.0000485294 | 153.13 | 0.671 | -0.067 |
| 5177 | MYT | 581  | 0.0000324834 | 161.83 | 0.709 | -0.033 |
| 5178 | MYW | 137  | 0.0000076596 | 197.40 | 0.865 | -0.100 |
| 5179 | MYY | 318  | 0.0000177792 | 187.00 | 0.819 | -0.233 |
| 5180 | MYV | 589  | 0.0000329306 | 167.67 | 0.735 | 1.600  |
| 5181 | MVA | 1756 | 0.0000981769 | 132.00 | 0.578 | 2.633  |
| 5182 | MVR | 1125 | 0.0000628981 | 166.67 | 0.730 | 0.533  |
| 5183 | MVN | 899  | 0.0000502626 | 143.57 | 0.629 | 0.867  |
| 5184 | MVD | 1114 | 0.0000622831 | 141.10 | 0.618 | 0.867  |
| 5185 | MVC | 525  | 0.0000293524 | 136.43 | 0.598 | 2.867  |
| 5186 | MVQ | 1241 | 0.0000693836 | 151.80 | 0.665 | 0.867  |
| 5187 | MVE | 1568 | 0.0000876659 | 149.40 | 0.655 | 0.867  |
| 5188 | MVG | 1317 | 0.0000736327 | 123.63 | 0.542 | 1.900  |
| 5189 | MVH | 706  | 0.0000394720 | 155.33 | 0.681 | 0.967  |
| 5190 | MVI | 1167 | 0.0000652463 | 156.63 | 0.686 | 3.533  |
| 5191 | MVL | 2315 | 0.0001294303 | 156.67 | 0.687 | 3.300  |
| 5192 | MVK | 1211 | 0.0000677063 | 157.77 | 0.691 | 0.733  |
| 5193 | MVM | 615  | 0.0000343843 | 157.67 | 0.691 | 2.667  |
| 5194 | MVF | 807  | 0.0000451189 | 165.97 | 0.727 | 2.967  |

|      |     |      |              |        |       |        |
|------|-----|------|--------------|--------|-------|--------|
| 5195 | MVP | 1359 | 0.0000759809 | 142.97 | 0.626 | 1.500  |
| 5196 | MVS | 2047 | 0.0001144465 | 133.80 | 0.586 | 1.767  |
| 5197 | MVT | 1531 | 0.0000855973 | 142.50 | 0.624 | 1.800  |
| 5198 | MVW | 416  | 0.0000232583 | 178.07 | 0.780 | 1.733  |
| 5199 | MVY | 584  | 0.0000326511 | 167.67 | 0.735 | 1.600  |
| 5200 | MVV | 1594 | 0.0000891196 | 148.33 | 0.650 | 3.433  |
| 5201 | FAA | 2596 | 0.0001451408 | 123.97 | 0.543 | 2.133  |
| 5202 | FAR | 1755 | 0.0000981210 | 158.63 | 0.695 | 0.033  |
| 5203 | FAN | 1368 | 0.0000764841 | 135.53 | 0.594 | 0.367  |
| 5204 | FAD | 1727 | 0.0000965555 | 133.07 | 0.583 | 0.367  |
| 5205 | FAC | 841  | 0.0000470198 | 128.40 | 0.563 | 2.367  |
| 5206 | FAQ | 1537 | 0.0000859327 | 143.77 | 0.630 | 0.367  |
| 5207 | FAE | 2292 | 0.0001281443 | 141.37 | 0.619 | 0.367  |
| 5208 | FAG | 2199 | 0.0001229448 | 115.60 | 0.507 | 1.400  |
| 5209 | FAH | 853  | 0.0000476907 | 147.30 | 0.645 | 0.467  |
| 5210 | FAI | 1503 | 0.0000840318 | 148.60 | 0.651 | 3.033  |
| 5211 | FAL | 3215 | 0.0001797487 | 148.63 | 0.651 | 2.800  |
| 5212 | FAK | 1942 | 0.0001085761 | 149.73 | 0.656 | 0.233  |
| 5213 | FAM | 717  | 0.0000400870 | 149.63 | 0.656 | 2.167  |
| 5214 | FAF | 1569 | 0.0000877218 | 157.93 | 0.692 | 2.467  |
| 5215 | FAP | 1694 | 0.0000947105 | 134.93 | 0.591 | 1.000  |
| 5216 | FAS | 2690 | 0.0001503963 | 125.77 | 0.551 | 1.267  |
| 5217 | FAT | 1685 | 0.0000942073 | 134.47 | 0.589 | 1.300  |
| 5218 | FAW | 428  | 0.0000239292 | 170.03 | 0.745 | 1.233  |
| 5219 | FAY | 931  | 0.0000520517 | 159.63 | 0.700 | 1.100  |
| 5220 | FAV | 2519 | 0.0001408358 | 140.30 | 0.615 | 2.933  |
| 5221 | FRA | 2144 | 0.0001198698 | 158.63 | 0.695 | 0.033  |
| 5222 | FRR | 2516 | 0.0001406681 | 193.30 | 0.847 | -2.067 |
| 5223 | FRN | 1650 | 0.0000922505 | 170.20 | 0.746 | -1.733 |
| 5224 | FRD | 2104 | 0.0001176334 | 167.73 | 0.735 | -1.733 |
| 5225 | FRC | 1132 | 0.0000632894 | 163.07 | 0.715 | 0.267  |
| 5226 | FRQ | 1642 | 0.0000918032 | 178.43 | 0.782 | -1.733 |
| 5227 | FRE | 2500 | 0.0001397735 | 176.03 | 0.771 | -1.733 |
| 5228 | FRG | 2220 | 0.0001241189 | 150.27 | 0.658 | -0.700 |
| 5229 | FRH | 1087 | 0.0000607735 | 181.97 | 0.797 | -1.633 |
| 5230 | FRI | 1483 | 0.0000829136 | 183.27 | 0.803 | 0.933  |
| 5231 | FRL | 2884 | 0.0001612427 | 183.30 | 0.803 | 0.700  |
| 5232 | FRK | 2408 | 0.0001346298 | 184.40 | 0.808 | -1.867 |
| 5233 | FRM | 673  | 0.0000376270 | 184.30 | 0.808 | 0.067  |
| 5234 | FRF | 1137 | 0.0000635690 | 192.60 | 0.844 | 0.367  |
| 5235 | FRP | 1668 | 0.0000932569 | 169.60 | 0.743 | -1.100 |
| 5236 | FRS | 2685 | 0.0001501167 | 160.43 | 0.703 | -0.833 |
| 5237 | FRT | 1604 | 0.0000896787 | 169.13 | 0.741 | -0.800 |
| 5238 | FRW | 445  | 0.0000248797 | 204.70 | 0.897 | -0.867 |
| 5239 | FRY | 981  | 0.0000548471 | 194.30 | 0.851 | -1.000 |
| 5240 | FRV | 2696 | 0.0001507317 | 174.97 | 0.767 | 0.833  |
| 5241 | FNA | 1218 | 0.0000680977 | 135.53 | 0.594 | 0.367  |
| 5242 | FNR | 1310 | 0.0000732413 | 170.20 | 0.746 | -1.733 |
| 5243 | FNN | 979  | 0.0000547353 | 147.10 | 0.645 | -1.400 |
| 5244 | FND | 997  | 0.0000557417 | 144.63 | 0.634 | -1.400 |
| 5245 | FNC | 579  | 0.0000323715 | 139.97 | 0.613 | 0.600  |
| 5246 | FNQ | 1278 | 0.0000714522 | 155.33 | 0.681 | -1.400 |

|      |     |      |              |        |       |        |
|------|-----|------|--------------|--------|-------|--------|
| 5247 | FNE | 1328 | 0.0000742477 | 152.93 | 0.670 | -1.400 |
| 5248 | FNG | 1165 | 0.0000651345 | 127.17 | 0.557 | -0.367 |
| 5249 | FNH | 692  | 0.0000386893 | 158.87 | 0.696 | -1.300 |
| 5250 | FNI | 1404 | 0.0000784968 | 160.17 | 0.702 | 1.267  |
| 5251 | FNL | 2300 | 0.0001285916 | 160.20 | 0.702 | 1.033  |
| 5252 | FNK | 1396 | 0.0000780495 | 161.30 | 0.707 | -1.533 |
| 5253 | FNM | 504  | 0.0000281783 | 161.20 | 0.706 | 0.400  |
| 5254 | FNF | 1033 | 0.0000577544 | 169.50 | 0.743 | 0.700  |
| 5255 | FNP | 1435 | 0.0000802300 | 146.50 | 0.642 | -0.767 |
| 5256 | FNS | 1902 | 0.0001063397 | 137.33 | 0.602 | -0.500 |
| 5257 | FNT | 1311 | 0.0000732972 | 146.03 | 0.640 | -0.467 |
| 5258 | FNW | 380  | 0.0000212456 | 181.60 | 0.796 | -0.533 |
| 5259 | FNX | 648  | 0.0000362293 | 171.20 | 0.750 | -0.667 |
| 5260 | FNV | 1236 | 0.0000691040 | 151.87 | 0.665 | 1.167  |
| 5261 | FDA | 1627 | 0.0000909646 | 133.07 | 0.583 | 0.367  |
| 5262 | FDR | 1519 | 0.0000849264 | 167.73 | 0.735 | -1.733 |
| 5263 | FDN | 1185 | 0.0000662526 | 144.63 | 0.634 | -1.400 |
| 5264 | FDD | 1552 | 0.0000867714 | 142.17 | 0.623 | -1.400 |
| 5265 | FDC | 578  | 0.0000323156 | 137.50 | 0.603 | 0.600  |
| 5266 | FDQ | 1031 | 0.0000576426 | 152.87 | 0.670 | -1.400 |
| 5267 | FDE | 1985 | 0.0001109802 | 150.47 | 0.659 | -1.400 |
| 5268 | FDG | 1798 | 0.0001005251 | 124.70 | 0.546 | -0.367 |
| 5269 | FDH | 767  | 0.0000428825 | 156.40 | 0.685 | -1.300 |
| 5270 | FDI | 1381 | 0.0000772109 | 157.70 | 0.691 | 1.267  |
| 5271 | FDL | 2583 | 0.0001444140 | 157.73 | 0.691 | 1.033  |
| 5272 | FDK | 1380 | 0.0000771550 | 158.83 | 0.696 | -1.533 |
| 5273 | FDM | 550  | 0.0000307502 | 158.73 | 0.696 | 0.400  |
| 5274 | FDF | 1355 | 0.0000757572 | 167.03 | 0.732 | 0.700  |
| 5275 | FDP | 1678 | 0.0000938160 | 144.03 | 0.631 | -0.767 |
| 5276 | FDS | 2224 | 0.0001243425 | 134.87 | 0.591 | -0.500 |
| 5277 | FDT | 1290 | 0.0000721231 | 143.57 | 0.629 | -0.467 |
| 5278 | FDW | 383  | 0.0000214133 | 179.13 | 0.785 | -0.533 |
| 5279 | FDY | 1041 | 0.0000582017 | 168.73 | 0.739 | -0.667 |
| 5280 | FDV | 1750 | 0.0000978414 | 149.40 | 0.655 | 1.167  |
| 5281 | FCA | 970  | 0.0000542321 | 128.40 | 0.563 | 2.367  |
| 5282 | FCR | 1065 | 0.0000595435 | 163.07 | 0.715 | 0.267  |
| 5283 | FCN | 645  | 0.0000360616 | 139.97 | 0.613 | 0.600  |
| 5284 | FCD | 928  | 0.0000518839 | 137.50 | 0.603 | 0.600  |
| 5285 | FCC | 612  | 0.0000342166 | 132.83 | 0.582 | 2.600  |
| 5286 | FCQ | 810  | 0.0000452866 | 148.20 | 0.649 | 0.600  |
| 5287 | FCE | 990  | 0.0000553503 | 145.80 | 0.639 | 0.600  |
| 5288 | FCG | 1284 | 0.0000717877 | 120.03 | 0.526 | 1.633  |
| 5289 | FCH | 522  | 0.0000291847 | 151.73 | 0.665 | 0.700  |
| 5290 | FCI | 721  | 0.0000403107 | 153.03 | 0.671 | 3.267  |
| 5291 | FCL | 1764 | 0.0000986242 | 153.07 | 0.671 | 3.033  |
| 5292 | FCK | 838  | 0.0000468521 | 154.17 | 0.676 | 0.467  |
| 5293 | FCM | 312  | 0.0000174437 | 154.07 | 0.675 | 2.400  |
| 5294 | FCF | 730  | 0.0000408139 | 162.37 | 0.712 | 2.700  |
| 5295 | FCP | 958  | 0.0000535612 | 139.37 | 0.611 | 1.233  |
| 5296 | FCS | 1431 | 0.0000800063 | 130.20 | 0.571 | 1.500  |
| 5297 | FCT | 823  | 0.0000460134 | 138.90 | 0.609 | 1.533  |
| 5298 | FCW | 278  | 0.0000155428 | 174.47 | 0.765 | 1.467  |

|      |     |      |              |        |       |        |
|------|-----|------|--------------|--------|-------|--------|
| 5299 | FCY | 531  | 0.0000296879 | 164.07 | 0.719 | 1.333  |
| 5300 | FCV | 845  | 0.0000472434 | 144.73 | 0.634 | 3.167  |
| 5301 | FQA | 2312 | 0.0001292625 | 143.77 | 0.630 | 0.367  |
| 5302 | FQR | 1978 | 0.0001105888 | 178.43 | 0.782 | -1.733 |
| 5303 | FQN | 1643 | 0.0000918591 | 155.33 | 0.681 | -1.400 |
| 5304 | FQD | 1769 | 0.0000989037 | 152.87 | 0.670 | -1.400 |
| 5305 | FQC | 949  | 0.0000530580 | 148.20 | 0.649 | 0.600  |
| 5306 | FQQ | 1749 | 0.0000977855 | 163.57 | 0.717 | -1.400 |
| 5307 | FQE | 2663 | 0.0001488867 | 161.17 | 0.706 | -1.400 |
| 5308 | FQG | 2213 | 0.0001237275 | 135.40 | 0.593 | -0.367 |
| 5309 | FQH | 882  | 0.0000493121 | 167.10 | 0.732 | -1.300 |
| 5310 | FQI | 1361 | 0.0000760927 | 168.40 | 0.738 | 1.267  |
| 5311 | FQL | 2661 | 0.0001487749 | 168.43 | 0.738 | 1.033  |
| 5312 | FQK | 2153 | 0.0001203729 | 169.53 | 0.743 | -1.533 |
| 5313 | FQM | 552  | 0.0000308620 | 169.43 | 0.742 | 0.400  |
| 5314 | FQF | 934  | 0.0000522194 | 177.73 | 0.779 | 0.700  |
| 5315 | FQP | 1674 | 0.0000935923 | 154.73 | 0.678 | -0.767 |
| 5316 | FQS | 1929 | 0.0001078492 | 145.57 | 0.638 | -0.500 |
| 5317 | FQT | 1660 | 0.0000928096 | 154.27 | 0.676 | -0.467 |
| 5318 | FQW | 325  | 0.0000181706 | 189.83 | 0.832 | -0.533 |
| 5319 | FQY | 729  | 0.0000407580 | 179.43 | 0.786 | -0.667 |
| 5320 | FQV | 1935 | 0.0001081847 | 160.10 | 0.702 | 1.167  |
| 5321 | FEA | 2081 | 0.0001163475 | 141.37 | 0.619 | 0.367  |
| 5322 | FER | 1804 | 0.0001008606 | 176.03 | 0.771 | -1.733 |
| 5323 | FEN | 1739 | 0.0000972264 | 152.93 | 0.670 | -1.400 |
| 5324 | FED | 2730 | 0.0001526327 | 150.47 | 0.659 | -1.400 |
| 5325 | FEC | 986  | 0.0000551267 | 145.80 | 0.639 | 0.600  |
| 5326 | FEQ | 1394 | 0.0000779377 | 161.17 | 0.706 | -1.400 |
| 5327 | FEE | 3437 | 0.0001921606 | 158.77 | 0.696 | -1.400 |
| 5328 | FEG | 2098 | 0.0001172979 | 133.00 | 0.583 | -0.367 |
| 5329 | FEH | 782  | 0.0000437211 | 164.70 | 0.722 | -1.300 |
| 5330 | FEI | 1595 | 0.0000891755 | 166.00 | 0.727 | 1.267  |
| 5331 | FEL | 2320 | 0.0001297098 | 166.03 | 0.728 | 1.033  |
| 5332 | FEK | 2453 | 0.0001371458 | 167.13 | 0.732 | -1.533 |
| 5333 | FEM | 670  | 0.0000374593 | 167.03 | 0.732 | 0.400  |
| 5334 | FEF | 972  | 0.0000543439 | 175.33 | 0.768 | 0.700  |
| 5335 | FEP | 1178 | 0.0000658613 | 152.33 | 0.668 | -0.767 |
| 5336 | FES | 2140 | 0.0001196461 | 143.17 | 0.627 | -0.500 |
| 5337 | FET | 1730 | 0.0000967233 | 151.87 | 0.665 | -0.467 |
| 5338 | FEW | 287  | 0.0000160460 | 187.43 | 0.821 | -0.533 |
| 5339 | FEY | 878  | 0.0000490885 | 177.03 | 0.776 | -0.667 |
| 5340 | FEV | 2069 | 0.0001156766 | 157.70 | 0.691 | 1.167  |
| 5341 | FGA | 2422 | 0.0001354126 | 115.60 | 0.507 | 1.400  |
| 5342 | FGR | 1854 | 0.0001036560 | 150.27 | 0.658 | -0.700 |
| 5343 | FGN | 1781 | 0.0000995746 | 127.17 | 0.557 | -0.367 |
| 5344 | FGD | 2019 | 0.0001128811 | 124.70 | 0.546 | -0.367 |
| 5345 | FGC | 805  | 0.0000450071 | 120.03 | 0.526 | 1.633  |
| 5346 | FGQ | 1687 | 0.0000943192 | 135.40 | 0.593 | -0.367 |
| 5347 | FGE | 2224 | 0.0001243425 | 133.00 | 0.583 | -0.367 |
| 5348 | FGG | 3088 | 0.0001726482 | 107.23 | 0.470 | 0.667  |
| 5349 | FGH | 1020 | 0.0000570276 | 138.93 | 0.609 | -0.267 |
| 5350 | FGI | 1888 | 0.0001055569 | 140.23 | 0.615 | 2.300  |

|      |     |      |              |        |       |        |
|------|-----|------|--------------|--------|-------|--------|
| 5351 | FGL | 3460 | 0.0001934465 | 140.27 | 0.615 | 2.067  |
| 5352 | FGK | 2345 | 0.0001311075 | 141.37 | 0.619 | -0.500 |
| 5353 | FGM | 830  | 0.0000464048 | 141.27 | 0.619 | 1.433  |
| 5354 | FGF | 1936 | 0.0001082406 | 149.57 | 0.655 | 1.733  |
| 5355 | FGP | 2108 | 0.0001178570 | 126.57 | 0.555 | 0.267  |
| 5356 | FGS | 3150 | 0.0001761146 | 117.40 | 0.514 | 0.533  |
| 5357 | FGT | 1981 | 0.0001107565 | 126.10 | 0.553 | 0.567  |
| 5358 | FGW | 417  | 0.0000233142 | 161.67 | 0.708 | 0.500  |
| 5359 | FGY | 1072 | 0.0000599349 | 151.27 | 0.663 | 0.367  |
| 5360 | FGV | 2271 | 0.0001269702 | 131.93 | 0.578 | 2.200  |
| 5361 | FHA | 964  | 0.0000538967 | 147.30 | 0.645 | 0.467  |
| 5362 | FHR | 1130 | 0.0000631776 | 181.97 | 0.797 | -1.633 |
| 5363 | FHN | 658  | 0.0000367884 | 158.87 | 0.696 | -1.300 |
| 5364 | FHD | 668  | 0.0000373475 | 156.40 | 0.685 | -1.300 |
| 5365 | FHC | 598  | 0.0000334338 | 151.73 | 0.665 | 0.700  |
| 5366 | FHQ | 910  | 0.0000508776 | 167.10 | 0.732 | -1.300 |
| 5367 | FHE | 974  | 0.0000544558 | 164.70 | 0.722 | -1.300 |
| 5368 | FHG | 1206 | 0.0000674267 | 138.93 | 0.609 | -0.267 |
| 5369 | FHH | 632  | 0.0000353347 | 170.63 | 0.748 | -1.200 |
| 5370 | FHI | 849  | 0.0000474671 | 171.93 | 0.753 | 1.367  |
| 5371 | FHL | 1880 | 0.0001051097 | 171.97 | 0.754 | 1.133  |
| 5372 | FHK | 972  | 0.0000543439 | 173.07 | 0.758 | -1.433 |
| 5373 | FHM | 369  | 0.0000206306 | 172.97 | 0.758 | 0.500  |
| 5374 | FHF | 938  | 0.0000524430 | 181.27 | 0.794 | 0.800  |
| 5375 | FHP | 1312 | 0.0000733531 | 158.27 | 0.694 | -0.667 |
| 5376 | FHS | 1721 | 0.0000962201 | 149.10 | 0.653 | -0.400 |
| 5377 | FHT | 959  | 0.0000536171 | 157.80 | 0.691 | -0.367 |
| 5378 | FHW | 238  | 0.0000133064 | 193.37 | 0.847 | -0.433 |
| 5379 | FHY | 636  | 0.0000355584 | 182.97 | 0.802 | -0.567 |
| 5380 | FHV | 1107 | 0.0000618917 | 163.63 | 0.717 | 1.267  |
| 5381 | FIA | 1705 | 0.0000953255 | 148.60 | 0.651 | 3.033  |
| 5382 | FIR | 1660 | 0.0000928096 | 183.27 | 0.803 | 0.933  |
| 5383 | FIN | 1363 | 0.0000762045 | 160.17 | 0.702 | 1.267  |
| 5384 | FID | 1562 | 0.0000873305 | 157.70 | 0.691 | 1.267  |
| 5385 | FIC | 933  | 0.0000521635 | 153.03 | 0.671 | 3.267  |
| 5386 | FIQ | 1597 | 0.0000892873 | 168.40 | 0.738 | 1.267  |
| 5387 | FIE | 1539 | 0.0000860446 | 166.00 | 0.727 | 1.267  |
| 5388 | FIG | 1680 | 0.0000939278 | 140.23 | 0.615 | 2.300  |
| 5389 | FIH | 1010 | 0.0000564685 | 171.93 | 0.753 | 1.367  |
| 5390 | FII | 1844 | 0.0001030969 | 173.23 | 0.759 | 3.933  |
| 5391 | FIL | 3295 | 0.0001842215 | 173.27 | 0.759 | 3.700  |
| 5392 | FIK | 1674 | 0.0000935923 | 174.37 | 0.764 | 1.133  |
| 5393 | FIM | 570  | 0.0000318684 | 174.27 | 0.764 | 3.067  |
| 5394 | FIF | 1558 | 0.0000871068 | 182.57 | 0.800 | 3.367  |
| 5395 | FIP | 1655 | 0.0000925301 | 159.57 | 0.699 | 1.900  |
| 5396 | FIS | 2537 | 0.0001418421 | 150.40 | 0.659 | 2.167  |
| 5397 | FIT | 1783 | 0.0000996865 | 159.10 | 0.697 | 2.200  |
| 5398 | FIW | 395  | 0.0000220842 | 194.67 | 0.853 | 2.133  |
| 5399 | FIY | 1149 | 0.0000642399 | 184.27 | 0.807 | 2.000  |
| 5400 | FIV | 1643 | 0.0000918591 | 164.93 | 0.723 | 3.833  |
| 5401 | FLA | 4647 | 0.0002598110 | 148.63 | 0.651 | 2.800  |
| 5402 | FLR | 4188 | 0.0002341486 | 183.30 | 0.803 | 0.700  |



|      |     |      |              |        |       |        |
|------|-----|------|--------------|--------|-------|--------|
| 5403 | FLN | 2737 | 0.0001530240 | 160.20 | 0.702 | 1.033  |
| 5404 | FLD | 3417 | 0.0001910424 | 157.73 | 0.691 | 1.033  |
| 5405 | FLC | 1812 | 0.0001013078 | 153.07 | 0.671 | 3.033  |
| 5406 | FLQ | 3808 | 0.0002129030 | 168.43 | 0.738 | 1.033  |
| 5407 | FLE | 4608 | 0.0002576305 | 166.03 | 0.728 | 1.033  |
| 5408 | FLG | 4501 | 0.0002516482 | 140.27 | 0.615 | 2.067  |
| 5409 | FLH | 2036 | 0.0001138315 | 171.97 | 0.754 | 1.133  |
| 5410 | FLI | 2964 | 0.0001657155 | 173.27 | 0.759 | 3.700  |
| 5411 | FLL | 8126 | 0.0004543198 | 173.30 | 0.759 | 3.467  |
| 5412 | FLK | 4184 | 0.0002339249 | 174.40 | 0.764 | 0.900  |
| 5413 | FLM | 1278 | 0.0000714522 | 174.30 | 0.764 | 2.833  |
| 5414 | FLF | 2847 | 0.0001591741 | 182.60 | 0.800 | 3.133  |
| 5415 | FLP | 4051 | 0.0002264890 | 159.60 | 0.699 | 1.667  |
| 5416 | FLS | 5739 | 0.0003208641 | 150.43 | 0.659 | 1.933  |
| 5417 | FLT | 3663 | 0.0002047961 | 159.13 | 0.697 | 1.967  |
| 5418 | FLW | 921  | 0.0000514926 | 194.70 | 0.853 | 1.900  |
| 5419 | FLY | 1888 | 0.0001055569 | 184.30 | 0.808 | 1.767  |
| 5420 | FLV | 4259 | 0.0002381181 | 164.97 | 0.723 | 3.600  |
| 5421 | FKA | 1844 | 0.0001030969 | 149.73 | 0.656 | 0.233  |
| 5422 | FKR | 1797 | 0.0001004692 | 184.40 | 0.808 | -1.867 |
| 5423 | FKN | 1538 | 0.0000859887 | 161.30 | 0.707 | -1.533 |
| 5424 | FKD | 2108 | 0.0001178570 | 158.83 | 0.696 | -1.533 |
| 5425 | FKC | 1203 | 0.0000672590 | 154.17 | 0.676 | 0.467  |
| 5426 | FKQ | 1462 | 0.0000817395 | 169.53 | 0.743 | -1.533 |
| 5427 | FKE | 2610 | 0.0001459235 | 167.13 | 0.732 | -1.533 |
| 5428 | FKG | 1919 | 0.0001072901 | 141.37 | 0.619 | -0.500 |
| 5429 | FKH | 742  | 0.0000414848 | 173.07 | 0.758 | -1.433 |
| 5430 | FKI | 1455 | 0.0000813482 | 174.37 | 0.764 | 1.133  |
| 5431 | FKL | 2307 | 0.0001289830 | 174.40 | 0.764 | 0.900  |
| 5432 | FKK | 2257 | 0.0001261875 | 175.50 | 0.769 | -1.667 |
| 5433 | FKM | 685  | 0.0000382979 | 175.40 | 0.769 | 0.267  |
| 5434 | FKF | 874  | 0.0000488648 | 183.70 | 0.805 | 0.567  |
| 5435 | FKP | 1421 | 0.0000794473 | 160.70 | 0.704 | -0.900 |
| 5436 | FKS | 1939 | 0.0001084083 | 151.53 | 0.664 | -0.633 |
| 5437 | FKT | 1592 | 0.0000890078 | 160.23 | 0.702 | -0.600 |
| 5438 | FKW | 372  | 0.0000207983 | 195.80 | 0.858 | -0.667 |
| 5439 | FKY | 789  | 0.0000441125 | 185.40 | 0.812 | -0.800 |
| 5440 | FKV | 1699 | 0.0000949901 | 166.07 | 0.728 | 1.033  |
| 5441 | FMA | 910  | 0.0000508776 | 149.63 | 0.656 | 2.167  |
| 5442 | FMR | 574  | 0.0000320920 | 184.30 | 0.808 | 0.067  |
| 5443 | FMN | 495  | 0.0000276752 | 161.20 | 0.706 | 0.400  |
| 5444 | FMD | 772  | 0.0000431621 | 158.73 | 0.696 | 0.400  |
| 5445 | FMC | 345  | 0.0000192887 | 154.07 | 0.675 | 2.400  |
| 5446 | FMQ | 506  | 0.0000282902 | 169.43 | 0.742 | 0.400  |
| 5447 | FME | 1023 | 0.0000571953 | 167.03 | 0.732 | 0.400  |
| 5448 | FMG | 840  | 0.0000469639 | 141.27 | 0.619 | 1.433  |
| 5449 | FMH | 233  | 0.0000130269 | 172.97 | 0.758 | 0.500  |
| 5450 | FMI | 509  | 0.0000284579 | 174.27 | 0.764 | 3.067  |
| 5451 | FML | 1038 | 0.0000580340 | 174.30 | 0.764 | 2.833  |
| 5452 | FMK | 723  | 0.0000404225 | 175.40 | 0.769 | 0.267  |
| 5453 | FMM | 244  | 0.0000136419 | 175.30 | 0.768 | 2.200  |
| 5454 | FMF | 429  | 0.0000239851 | 183.60 | 0.805 | 2.500  |

|      |     |      |              |        |       |        |
|------|-----|------|--------------|--------|-------|--------|
| 5455 | FMP | 575  | 0.0000321479 | 160.60 | 0.704 | 1.033  |
| 5456 | FMS | 773  | 0.0000432180 | 151.43 | 0.664 | 1.300  |
| 5457 | FMT | 614  | 0.0000343284 | 160.13 | 0.702 | 1.333  |
| 5458 | FMW | 147  | 0.0000082187 | 195.70 | 0.858 | 1.267  |
| 5459 | FMY | 421  | 0.0000235379 | 185.30 | 0.812 | 1.133  |
| 5460 | FMV | 782  | 0.0000437211 | 165.97 | 0.727 | 2.967  |
| 5461 | FFA | 1403 | 0.0000784409 | 157.93 | 0.692 | 2.467  |
| 5462 | FFR | 1641 | 0.0000917473 | 192.60 | 0.844 | 0.367  |
| 5463 | FFN | 1134 | 0.0000634013 | 169.50 | 0.743 | 0.700  |
| 5464 | FFD | 1188 | 0.0000664204 | 167.03 | 0.732 | 0.700  |
| 5465 | FFC | 871  | 0.0000486971 | 162.37 | 0.712 | 2.700  |
| 5466 | FFQ | 1209 | 0.0000675945 | 177.73 | 0.779 | 0.700  |
| 5467 | FFE | 1258 | 0.0000703340 | 175.33 | 0.768 | 0.700  |
| 5468 | FFG | 1497 | 0.0000836964 | 149.57 | 0.655 | 1.733  |
| 5469 | FFH | 752  | 0.0000420439 | 181.27 | 0.794 | 0.800  |
| 5470 | FFI | 1650 | 0.0000922505 | 182.57 | 0.800 | 3.367  |
| 5471 | FFL | 3261 | 0.0001823206 | 182.60 | 0.800 | 3.133  |
| 5472 | FFK | 1507 | 0.0000842555 | 183.70 | 0.805 | 0.567  |
| 5473 | FFM | 556  | 0.0000310856 | 183.60 | 0.805 | 2.500  |
| 5474 | FFF | 1329 | 0.0000743036 | 191.90 | 0.841 | 2.800  |
| 5475 | FFP | 1431 | 0.0000800063 | 168.90 | 0.740 | 1.333  |
| 5476 | FFS | 2472 | 0.0001382080 | 159.73 | 0.700 | 1.600  |
| 5477 | FFT | 1580 | 0.0000883368 | 168.43 | 0.738 | 1.633  |
| 5478 | FFW | 393  | 0.0000219724 | 204.00 | 0.894 | 1.567  |
| 5479 | FFY | 785  | 0.0000438889 | 193.60 | 0.848 | 1.433  |
| 5480 | FFV | 1540 | 0.0000861005 | 174.27 | 0.764 | 3.267  |
| 5481 | FPA | 2869 | 0.0001604041 | 134.93 | 0.591 | 1.000  |
| 5482 | FPR | 1913 | 0.0001069547 | 169.60 | 0.743 | -1.100 |
| 5483 | FPN | 1326 | 0.0000741359 | 146.50 | 0.642 | -0.767 |
| 5484 | FPD | 1924 | 0.0001075697 | 144.03 | 0.631 | -0.767 |
| 5485 | FPC | 887  | 0.0000495916 | 139.37 | 0.611 | 1.233  |
| 5486 | FPQ | 1524 | 0.0000852059 | 154.73 | 0.678 | -0.767 |
| 5487 | FPE | 2731 | 0.0001526886 | 152.33 | 0.668 | -0.767 |
| 5488 | FPG | 3453 | 0.0001930552 | 126.57 | 0.555 | 0.267  |
| 5489 | FPH | 956  | 0.0000534494 | 158.27 | 0.694 | -0.667 |
| 5490 | FPI | 1198 | 0.0000669795 | 159.57 | 0.699 | 1.900  |
| 5491 | FPL | 3100 | 0.0001733191 | 159.60 | 0.699 | 1.667  |
| 5492 | FPK | 1780 | 0.0000995187 | 160.70 | 0.704 | -0.900 |
| 5493 | FPM | 580  | 0.0000324275 | 160.60 | 0.704 | 1.033  |
| 5494 | FPF | 1544 | 0.0000863241 | 168.90 | 0.740 | 1.333  |
| 5495 | FPP | 2662 | 0.0001488308 | 145.90 | 0.639 | -0.133 |
| 5496 | FPS | 3319 | 0.0001855633 | 136.73 | 0.599 | 0.133  |
| 5497 | FPT | 1742 | 0.0000973942 | 145.43 | 0.637 | 0.167  |
| 5498 | FPW | 428  | 0.0000239292 | 181.00 | 0.793 | 0.100  |
| 5499 | FPY | 921  | 0.0000514926 | 170.60 | 0.748 | -0.033 |
| 5500 | FPV | 2304 | 0.0001288153 | 151.27 | 0.663 | 1.800  |
| 5501 | FSA | 3609 | 0.0002017770 | 125.77 | 0.551 | 1.267  |
| 5502 | FSR | 3536 | 0.0001976956 | 160.43 | 0.703 | -0.833 |
| 5503 | FSN | 2235 | 0.0001249575 | 137.33 | 0.602 | -0.500 |
| 5504 | FSD | 2865 | 0.0001601804 | 134.87 | 0.591 | -0.500 |
| 5505 | FSC | 1567 | 0.0000876100 | 130.20 | 0.571 | 1.500  |
| 5506 | FSQ | 3481 | 0.0001946206 | 145.57 | 0.638 | -0.500 |

|      |     |      |              |        |       |        |
|------|-----|------|--------------|--------|-------|--------|
| 5507 | FSE | 3662 | 0.0002047402 | 143.17 | 0.627 | -0.500 |
| 5508 | FSG | 3791 | 0.0002119525 | 117.40 | 0.514 | 0.533  |
| 5509 | FSH | 1901 | 0.0001062838 | 149.10 | 0.653 | -0.400 |
| 5510 | FSI | 2657 | 0.0001485513 | 150.40 | 0.659 | 2.167  |
| 5511 | FSL | 5757 | 0.0003218704 | 150.43 | 0.659 | 1.933  |
| 5512 | FSK | 3210 | 0.0001794692 | 151.53 | 0.664 | -0.633 |
| 5513 | FSM | 1031 | 0.0000576426 | 151.43 | 0.664 | 1.300  |
| 5514 | FSF | 2557 | 0.0001429603 | 159.73 | 0.700 | 1.600  |
| 5515 | FSP | 3686 | 0.0002060821 | 136.73 | 0.599 | 0.133  |
| 5516 | FSS | 6254 | 0.0003496574 | 127.57 | 0.559 | 0.400  |
| 5517 | FST | 3481 | 0.0001946206 | 136.27 | 0.597 | 0.433  |
| 5518 | FSW | 909  | 0.0000508216 | 171.83 | 0.753 | 0.367  |
| 5519 | FSY | 1703 | 0.0000952137 | 161.43 | 0.707 | 0.233  |
| 5520 | FSV | 3605 | 0.0002015534 | 142.10 | 0.623 | 2.067  |
| 5521 | FTA | 2300 | 0.0001285916 | 134.47 | 0.589 | 1.300  |
| 5522 | FTR | 1669 | 0.0000933128 | 169.13 | 0.741 | -0.800 |
| 5523 | FTN | 1326 | 0.0000741359 | 146.03 | 0.640 | -0.467 |
| 5524 | FTD | 1838 | 0.0001027615 | 143.57 | 0.629 | -0.467 |
| 5525 | FTC | 1200 | 0.0000670913 | 138.90 | 0.609 | 1.533  |
| 5526 | FTQ | 1777 | 0.0000993510 | 154.27 | 0.676 | -0.467 |
| 5527 | FTE | 2092 | 0.0001169625 | 151.87 | 0.665 | -0.467 |
| 5528 | FTG | 2104 | 0.0001176334 | 126.10 | 0.553 | 0.567  |
| 5529 | FTH | 845  | 0.0000472434 | 157.80 | 0.691 | -0.367 |
| 5530 | FTI | 1753 | 0.0000980092 | 159.10 | 0.697 | 2.200  |
| 5531 | FTL | 3318 | 0.0001855074 | 159.13 | 0.697 | 1.967  |
| 5532 | FTK | 1915 | 0.0001070665 | 160.23 | 0.702 | -0.600 |
| 5533 | FTM | 611  | 0.0000341606 | 160.13 | 0.702 | 1.333  |
| 5534 | FTF | 1619 | 0.0000905173 | 168.43 | 0.738 | 1.633  |
| 5535 | FTP | 1849 | 0.0001033765 | 145.43 | 0.637 | 0.167  |
| 5536 | FTS | 2987 | 0.0001670014 | 136.27 | 0.597 | 0.433  |
| 5537 | FTT | 2047 | 0.0001144465 | 144.97 | 0.635 | 0.467  |
| 5538 | FTW | 511  | 0.0000285697 | 180.53 | 0.791 | 0.400  |
| 5539 | FTY | 1066 | 0.0000595994 | 170.13 | 0.746 | 0.267  |
| 5540 | FTV | 2807 | 0.0001569377 | 150.80 | 0.661 | 2.100  |
| 5541 | FWA | 651  | 0.0000363970 | 170.03 | 0.745 | 1.233  |
| 5542 | FWR | 629  | 0.0000351670 | 204.70 | 0.897 | -0.867 |
| 5543 | FWN | 473  | 0.0000264451 | 181.60 | 0.796 | -0.533 |
| 5544 | FWD | 528  | 0.0000295202 | 179.13 | 0.785 | -0.533 |
| 5545 | FWC | 200  | 0.0000111819 | 174.47 | 0.765 | 1.467  |
| 5546 | FWQ | 351  | 0.0000196242 | 189.83 | 0.832 | -0.533 |
| 5547 | FWE | 597  | 0.0000333779 | 187.43 | 0.821 | -0.533 |
| 5548 | FWG | 601  | 0.0000336016 | 161.67 | 0.708 | 0.500  |
| 5549 | FWH | 168  | 0.0000093928 | 193.37 | 0.847 | -0.433 |
| 5550 | FWI | 407  | 0.0000227551 | 194.67 | 0.853 | 2.133  |
| 5551 | FWL | 869  | 0.0000485853 | 194.70 | 0.853 | 1.900  |
| 5552 | FWK | 709  | 0.0000396398 | 195.80 | 0.858 | -0.667 |
| 5553 | FWM | 222  | 0.0000124119 | 195.70 | 0.858 | 1.267  |
| 5554 | FWF | 287  | 0.0000160460 | 204.00 | 0.894 | 1.567  |
| 5555 | FWP | 442  | 0.0000247120 | 181.00 | 0.793 | 0.100  |
| 5556 | FWS | 545  | 0.0000304706 | 171.83 | 0.753 | 0.367  |
| 5557 | FWT | 505  | 0.0000282342 | 180.53 | 0.791 | 0.400  |
| 5558 | FWW | 165  | 0.0000092251 | 216.10 | 0.947 | 0.333  |

|      |     |       |              |        |       |        |
|------|-----|-------|--------------|--------|-------|--------|
| 5559 | FWY | 236   | 0.0000131946 | 205.70 | 0.901 | 0.200  |
| 5560 | FWV | 496   | 0.0000277311 | 186.37 | 0.817 | 2.033  |
| 5561 | FYA | 1048  | 0.0000585931 | 159.63 | 0.700 | 1.100  |
| 5562 | FYR | 1256  | 0.0000702222 | 194.30 | 0.851 | -1.000 |
| 5563 | FYN | 946   | 0.0000528903 | 171.20 | 0.750 | -0.667 |
| 5564 | FYD | 942   | 0.0000526667 | 168.73 | 0.739 | -0.667 |
| 5565 | FYC | 536   | 0.0000299674 | 164.07 | 0.719 | 1.333  |
| 5566 | FYQ | 934   | 0.0000522194 | 179.43 | 0.786 | -0.667 |
| 5567 | FYE | 1214  | 0.0000678740 | 177.03 | 0.776 | -0.667 |
| 5568 | FYG | 1264  | 0.0000706695 | 151.27 | 0.663 | 0.367  |
| 5569 | FYH | 621   | 0.0000347197 | 182.97 | 0.802 | -0.567 |
| 5570 | FYI | 989   | 0.0000552944 | 184.27 | 0.807 | 2.000  |
| 5571 | FYL | 1870  | 0.0001045506 | 184.30 | 0.808 | 1.767  |
| 5572 | FYK | 1096  | 0.0000612767 | 185.40 | 0.812 | -0.800 |
| 5573 | FYM | 386   | 0.0000215810 | 185.30 | 0.812 | 1.133  |
| 5574 | FYF | 972   | 0.0000543439 | 193.60 | 0.848 | 1.433  |
| 5575 | FYP | 1014  | 0.0000566921 | 170.60 | 0.748 | -0.033 |
| 5576 | FYS | 1670  | 0.0000933687 | 161.43 | 0.707 | 0.233  |
| 5577 | FYT | 1270  | 0.0000710049 | 170.13 | 0.746 | 0.267  |
| 5578 | FYW | 269   | 0.0000150396 | 205.70 | 0.901 | 0.200  |
| 5579 | FYY | 664   | 0.0000371238 | 195.30 | 0.856 | 0.067  |
| 5580 | FYV | 1151  | 0.0000643517 | 175.97 | 0.771 | 1.900  |
| 5581 | FVA | 2537  | 0.0001418421 | 140.30 | 0.615 | 2.933  |
| 5582 | FVR | 1932  | 0.0001080170 | 174.97 | 0.767 | 0.833  |
| 5583 | FVN | 1601  | 0.0000895109 | 151.87 | 0.665 | 1.167  |
| 5584 | FVD | 1778  | 0.0000994069 | 149.40 | 0.655 | 1.167  |
| 5585 | FVC | 1132  | 0.0000632894 | 144.73 | 0.634 | 3.167  |
| 5586 | FVQ | 1592  | 0.0000890078 | 160.10 | 0.702 | 1.167  |
| 5587 | FVE | 2210  | 0.0001235598 | 157.70 | 0.691 | 1.167  |
| 5588 | FVG | 2526  | 0.0001412271 | 131.93 | 0.578 | 2.200  |
| 5589 | FVH | 989   | 0.0000552944 | 163.63 | 0.717 | 1.267  |
| 5590 | FVI | 1652  | 0.0000923623 | 164.93 | 0.723 | 3.833  |
| 5591 | FVL | 3617  | 0.0002022243 | 164.97 | 0.723 | 3.600  |
| 5592 | FVK | 2078  | 0.0001161797 | 166.07 | 0.728 | 1.033  |
| 5593 | FVM | 711   | 0.0000397516 | 165.97 | 0.727 | 2.967  |
| 5594 | FVF | 1643  | 0.0000918591 | 174.27 | 0.764 | 3.267  |
| 5595 | FVP | 1999  | 0.0001117629 | 151.27 | 0.663 | 1.800  |
| 5596 | FVS | 2690  | 0.0001503963 | 142.10 | 0.623 | 2.067  |
| 5597 | FVT | 1960  | 0.0001095824 | 150.80 | 0.661 | 2.100  |
| 5598 | FVW | 363   | 0.0000202951 | 186.37 | 0.817 | 2.033  |
| 5599 | FVY | 897   | 0.0000501507 | 175.97 | 0.771 | 1.900  |
| 5600 | FVV | 2329  | 0.0001302130 | 156.63 | 0.686 | 3.733  |
| 5601 | PAA | 10516 | 0.0005879432 | 100.97 | 0.442 | 0.667  |
| 5602 | PAR | 5273  | 0.0002948103 | 135.63 | 0.594 | -1.433 |
| 5603 | PAN | 2197  | 0.0001228329 | 112.53 | 0.493 | -1.100 |
| 5604 | PAD | 3552  | 0.0001985902 | 110.07 | 0.482 | -1.100 |
| 5605 | PAC | 1837  | 0.0001027056 | 105.40 | 0.462 | 0.900  |
| 5606 | PAQ | 4110  | 0.0002297876 | 120.77 | 0.529 | -1.100 |
| 5607 | PAE | 5338  | 0.0002984444 | 118.37 | 0.519 | -1.100 |
| 5608 | PAG | 8123  | 0.0004541521 | 92.60  | 0.406 | -0.067 |
| 5609 | PAH | 2202  | 0.0001231125 | 124.30 | 0.545 | -1.000 |
| 5610 | PAI | 2448  | 0.0001368662 | 125.60 | 0.550 | 1.567  |

|      |     |       |              |        |       |        |
|------|-----|-------|--------------|--------|-------|--------|
| 5611 | PAL | 9034  | 0.0005050855 | 125.63 | 0.551 | 1.333  |
| 5612 | PAK | 3409  | 0.0001905952 | 126.73 | 0.555 | -1.233 |
| 5613 | PAM | 1368  | 0.0000764841 | 126.63 | 0.555 | 0.700  |
| 5614 | PAF | 2792  | 0.0001560990 | 134.93 | 0.591 | 1.000  |
| 5615 | PAP | 12350 | 0.0006904811 | 111.93 | 0.491 | -0.467 |
| 5616 | PAS | 9441  | 0.0005278406 | 102.77 | 0.450 | -0.200 |
| 5617 | PAT | 5367  | 0.0003000658 | 111.47 | 0.488 | -0.167 |
| 5618 | PAW | 1022  | 0.0000571394 | 147.03 | 0.644 | -0.233 |
| 5619 | PAY | 1498  | 0.0000837523 | 136.63 | 0.599 | -0.367 |
| 5620 | PAV | 5514  | 0.0003082844 | 117.30 | 0.514 | 1.467  |
| 5621 | PRA | 5992  | 0.0003350091 | 135.63 | 0.594 | -1.433 |
| 5622 | PRR | 5791  | 0.0003237713 | 170.30 | 0.746 | -3.533 |
| 5623 | PRN | 1903  | 0.0001063956 | 147.20 | 0.645 | -3.200 |
| 5624 | PRD | 2908  | 0.0001625845 | 144.73 | 0.634 | -3.200 |
| 5625 | PRC | 1397  | 0.0000781054 | 140.07 | 0.614 | -1.200 |
| 5626 | PRQ | 2291  | 0.0001280884 | 155.43 | 0.681 | -3.200 |
| 5627 | PRE | 4018  | 0.0002246440 | 153.03 | 0.671 | -3.200 |
| 5628 | PRG | 6127  | 0.0003425569 | 127.27 | 0.558 | -2.167 |
| 5629 | PRH | 1747  | 0.0000976737 | 158.97 | 0.697 | -3.100 |
| 5630 | PRI | 1852  | 0.0001035442 | 160.27 | 0.702 | -0.533 |
| 5631 | PRL | 6103  | 0.0003412151 | 160.30 | 0.702 | -0.767 |
| 5632 | PRK | 3370  | 0.0001884147 | 161.40 | 0.707 | -3.333 |
| 5633 | PRM | 996   | 0.0000556858 | 161.30 | 0.707 | -1.400 |
| 5634 | PRF | 1877  | 0.0001049419 | 169.60 | 0.743 | -1.100 |
| 5635 | PRP | 7610  | 0.0004254705 | 146.60 | 0.642 | -2.567 |
| 5636 | PRS | 5856  | 0.0003274054 | 137.43 | 0.602 | -2.300 |
| 5637 | PRT | 3595  | 0.0002009943 | 146.13 | 0.640 | -2.267 |
| 5638 | PRW | 915   | 0.0000511571 | 181.70 | 0.796 | -2.333 |
| 5639 | PRY | 1208  | 0.0000675386 | 171.30 | 0.751 | -2.467 |
| 5640 | PRV | 3596  | 0.0002010502 | 151.97 | 0.666 | -0.633 |
| 5641 | PNA | 1972  | 0.0001102533 | 112.53 | 0.493 | -1.100 |
| 5642 | PNR | 1455  | 0.0000813482 | 147.20 | 0.645 | -3.200 |
| 5643 | PNN | 1161  | 0.0000649108 | 124.10 | 0.544 | -2.867 |
| 5644 | PND | 1171  | 0.0000654699 | 121.63 | 0.533 | -2.867 |
| 5645 | PNC | 821   | 0.0000459016 | 116.97 | 0.513 | -0.867 |
| 5646 | PNQ | 1352  | 0.0000755895 | 132.33 | 0.580 | -2.867 |
| 5647 | PNE | 1436  | 0.0000802859 | 129.93 | 0.569 | -2.867 |
| 5648 | PNG | 2528  | 0.0001413390 | 104.17 | 0.456 | -1.833 |
| 5649 | PNH | 811   | 0.0000453425 | 135.87 | 0.595 | -2.767 |
| 5650 | PNI | 1842  | 0.0001029851 | 137.17 | 0.601 | -0.200 |
| 5651 | PNL | 3022  | 0.0001689582 | 137.20 | 0.601 | -0.433 |
| 5652 | PNK | 1530  | 0.0000855414 | 138.30 | 0.606 | -3.000 |
| 5653 | PNM | 666   | 0.0000372357 | 138.20 | 0.606 | -1.067 |
| 5654 | PNF | 1214  | 0.0000678740 | 146.50 | 0.642 | -0.767 |
| 5655 | PNP | 2549  | 0.0001425131 | 123.50 | 0.541 | -2.233 |
| 5656 | PNS | 2983  | 0.0001667777 | 114.33 | 0.501 | -1.967 |
| 5657 | PNT | 2104  | 0.0001176334 | 123.03 | 0.539 | -1.933 |
| 5658 | PNW | 395   | 0.0000220842 | 158.60 | 0.695 | -2.000 |
| 5659 | PNY | 1013  | 0.0000566362 | 148.20 | 0.649 | -2.133 |
| 5660 | PNV | 1751  | 0.0000978974 | 128.87 | 0.565 | -0.300 |
| 5661 | PDA | 3343  | 0.0001869051 | 110.07 | 0.482 | -1.100 |
| 5662 | PDR | 2020  | 0.0001129370 | 144.73 | 0.634 | -3.200 |

|      |     |      |              |        |       |        |
|------|-----|------|--------------|--------|-------|--------|
| 5663 | PDN | 1458 | 0.0000815159 | 121.63 | 0.533 | -2.867 |
| 5664 | PDD | 2436 | 0.0001361953 | 119.17 | 0.522 | -2.867 |
| 5665 | PDC | 1186 | 0.0000663085 | 114.50 | 0.502 | -0.867 |
| 5666 | PDQ | 1759 | 0.0000983446 | 129.87 | 0.569 | -2.867 |
| 5667 | PDE | 2707 | 0.0001513467 | 127.47 | 0.559 | -2.867 |
| 5668 | PDG | 4218 | 0.0002358258 | 101.70 | 0.446 | -1.833 |
| 5669 | PDH | 1297 | 0.0000725145 | 133.40 | 0.585 | -2.767 |
| 5670 | PDI | 2153 | 0.0001203729 | 134.70 | 0.590 | -0.200 |
| 5671 | PDL | 4999 | 0.0002794911 | 134.73 | 0.590 | -0.433 |
| 5672 | PDK | 1880 | 0.0001051097 | 135.83 | 0.595 | -3.000 |
| 5673 | PDM | 908  | 0.0000507657 | 135.73 | 0.595 | -1.067 |
| 5674 | PDF | 1887 | 0.0001055010 | 144.03 | 0.631 | -0.767 |
| 5675 | PDP | 3929 | 0.0002196680 | 121.03 | 0.530 | -2.233 |
| 5676 | PDS | 4820 | 0.0002694833 | 111.87 | 0.490 | -1.967 |
| 5677 | PDT | 3001 | 0.0001677841 | 120.57 | 0.528 | -1.933 |
| 5678 | PDW | 705  | 0.0000394161 | 156.13 | 0.684 | -2.000 |
| 5679 | PDY | 1429 | 0.0000798945 | 145.73 | 0.639 | -2.133 |
| 5680 | PDV | 3092 | 0.0001728719 | 126.40 | 0.554 | -0.300 |
| 5681 | PCA | 1447 | 0.0000809009 | 105.40 | 0.462 | 0.900  |
| 5682 | PCR | 1236 | 0.0000691040 | 140.07 | 0.614 | -1.200 |
| 5683 | PCN | 636  | 0.0000355584 | 116.97 | 0.513 | -0.867 |
| 5684 | PCD | 764  | 0.0000427148 | 114.50 | 0.502 | -0.867 |
| 5685 | PCC | 818  | 0.0000457339 | 109.83 | 0.481 | 1.133  |
| 5686 | PCQ | 1169 | 0.0000653581 | 125.20 | 0.549 | -0.867 |
| 5687 | PCE | 1042 | 0.0000582576 | 122.80 | 0.538 | -0.867 |
| 5688 | PCG | 1745 | 0.0000975619 | 97.03  | 0.425 | 0.167  |
| 5689 | PCH | 712  | 0.0000398075 | 128.73 | 0.564 | -0.767 |
| 5690 | PCI | 784  | 0.0000438330 | 130.03 | 0.570 | 1.800  |
| 5691 | PCL | 2154 | 0.0001204288 | 130.07 | 0.570 | 1.567  |
| 5692 | PCK | 917  | 0.0000512689 | 131.17 | 0.575 | -1.000 |
| 5693 | PCM | 258  | 0.0000144246 | 131.07 | 0.574 | 0.933  |
| 5694 | PCF | 725  | 0.0000405343 | 139.37 | 0.611 | 1.233  |
| 5695 | PCP | 2672 | 0.0001493899 | 116.37 | 0.510 | -0.233 |
| 5696 | PCS | 2227 | 0.0001245102 | 107.20 | 0.470 | 0.033  |
| 5697 | PCT | 1202 | 0.0000672031 | 115.90 | 0.508 | 0.067  |
| 5698 | PCW | 330  | 0.0000184501 | 151.47 | 0.664 | 0.000  |
| 5699 | PCY | 494  | 0.0000276192 | 141.07 | 0.618 | -0.133 |
| 5700 | PCV | 1117 | 0.0000624508 | 121.73 | 0.533 | 1.700  |
| 5701 | PQA | 4269 | 0.0002386772 | 120.77 | 0.529 | -1.100 |
| 5702 | PQR | 2984 | 0.0001668336 | 155.43 | 0.681 | -3.200 |
| 5703 | PQN | 2003 | 0.0001119865 | 132.33 | 0.580 | -2.867 |
| 5704 | PQD | 2719 | 0.0001520177 | 129.87 | 0.569 | -2.867 |
| 5705 | PQC | 1031 | 0.0000576426 | 125.20 | 0.549 | -0.867 |
| 5706 | PQQ | 3128 | 0.0001748846 | 140.57 | 0.616 | -2.867 |
| 5707 | PQE | 3709 | 0.0002073680 | 138.17 | 0.605 | -2.867 |
| 5708 | PQG | 4523 | 0.0002528782 | 112.40 | 0.493 | -1.833 |
| 5709 | PQH | 1407 | 0.0000786645 | 144.10 | 0.631 | -2.767 |
| 5710 | PQI | 1748 | 0.0000977296 | 145.40 | 0.637 | -0.200 |
| 5711 | PQL | 4569 | 0.0002554501 | 145.43 | 0.637 | -0.433 |
| 5712 | PQK | 2347 | 0.0001312194 | 146.53 | 0.642 | -3.000 |
| 5713 | PQM | 911  | 0.0000509335 | 146.43 | 0.642 | -1.067 |
| 5714 | PQF | 1251 | 0.0000699427 | 154.73 | 0.678 | -0.767 |

|      |     |       |              |        |       |        |
|------|-----|-------|--------------|--------|-------|--------|
| 5715 | PQP | 5676  | 0.0003173418 | 131.73 | 0.577 | -2.233 |
| 5716 | PQS | 3991  | 0.0002231344 | 122.57 | 0.537 | -1.967 |
| 5717 | PQT | 2750  | 0.0001537509 | 131.27 | 0.575 | -1.933 |
| 5718 | PQW | 532   | 0.0000297438 | 166.83 | 0.731 | -2.000 |
| 5719 | PQY | 1085  | 0.0000606617 | 156.43 | 0.686 | -2.133 |
| 5720 | PQV | 3080  | 0.0001722009 | 137.10 | 0.601 | -0.300 |
| 5721 | PEA | 6384  | 0.0003569256 | 118.37 | 0.519 | -1.100 |
| 5722 | PER | 3861  | 0.0002158662 | 153.03 | 0.671 | -3.200 |
| 5723 | PEN | 3424  | 0.0001914338 | 129.93 | 0.569 | -2.867 |
| 5724 | PED | 5216  | 0.0002916234 | 127.47 | 0.559 | -2.867 |
| 5725 | PEC | 1456  | 0.0000814041 | 122.80 | 0.538 | -0.867 |
| 5726 | PEQ | 3055  | 0.0001708032 | 138.17 | 0.605 | -2.867 |
| 5727 | PEE | 7939  | 0.0004438647 | 135.77 | 0.595 | -2.867 |
| 5728 | PEG | 5945  | 0.0003323814 | 110.00 | 0.482 | -1.833 |
| 5729 | PEH | 1777  | 0.0000993510 | 141.70 | 0.621 | -2.767 |
| 5730 | PEI | 3046  | 0.0001703000 | 143.00 | 0.627 | -0.200 |
| 5731 | PEL | 6646  | 0.0003715739 | 143.03 | 0.627 | -0.433 |
| 5732 | PEK | 4554  | 0.0002546114 | 144.13 | 0.632 | -3.000 |
| 5733 | PEM | 1556  | 0.0000869950 | 144.03 | 0.631 | -1.067 |
| 5734 | PEF | 2040  | 0.0001140552 | 152.33 | 0.668 | -0.767 |
| 5735 | PEP | 6640  | 0.0003712384 | 129.33 | 0.567 | -2.233 |
| 5736 | PES | 5622  | 0.0003143226 | 120.17 | 0.527 | -1.967 |
| 5737 | PET | 4310  | 0.0002409695 | 128.87 | 0.565 | -1.933 |
| 5738 | PEW | 712   | 0.0000398075 | 164.43 | 0.721 | -2.000 |
| 5739 | PEY | 1552  | 0.0000867714 | 154.03 | 0.675 | -2.133 |
| 5740 | PEV | 5012  | 0.0002802179 | 134.70 | 0.590 | -0.300 |
| 5741 | PGA | 9630  | 0.0005384075 | 92.60  | 0.406 | -0.067 |
| 5742 | PGR | 6055  | 0.0003385314 | 127.27 | 0.558 | -2.167 |
| 5743 | PGN | 2638  | 0.0001474890 | 104.17 | 0.456 | -1.833 |
| 5744 | PGD | 4177  | 0.0002335336 | 101.70 | 0.446 | -1.833 |
| 5745 | PGC | 2118  | 0.0001184161 | 97.03  | 0.425 | 0.167  |
| 5746 | PGQ | 4305  | 0.0002406900 | 112.40 | 0.493 | -1.833 |
| 5747 | PGE | 5863  | 0.0003277968 | 110.00 | 0.482 | -1.833 |
| 5748 | PGG | 8142  | 0.0004552143 | 84.23  | 0.369 | -0.800 |
| 5749 | PGH | 2650  | 0.0001481599 | 115.93 | 0.508 | -1.733 |
| 5750 | PGI | 3254  | 0.0001819292 | 117.23 | 0.514 | 0.833  |
| 5751 | PGL | 9692  | 0.0005418739 | 117.27 | 0.514 | 0.600  |
| 5752 | PGK | 4179  | 0.0002336454 | 118.37 | 0.519 | -1.967 |
| 5753 | PGM | 1870  | 0.0001045506 | 118.27 | 0.518 | -0.033 |
| 5754 | PGF | 3393  | 0.0001897006 | 126.57 | 0.555 | 0.267  |
| 5755 | PGP | 13683 | 0.0007650083 | 103.57 | 0.454 | -1.200 |
| 5756 | PGS | 10289 | 0.0005752518 | 94.40  | 0.414 | -0.933 |
| 5757 | PGT | 6532  | 0.0003652002 | 103.10 | 0.452 | -0.900 |
| 5758 | PGW | 1292  | 0.0000722349 | 138.67 | 0.608 | -0.967 |
| 5759 | PGY | 2434  | 0.0001360835 | 128.27 | 0.562 | -1.100 |
| 5760 | PGV | 5373  | 0.0003004012 | 108.93 | 0.477 | 0.733  |
| 5761 | PHA | 1633  | 0.0000913000 | 124.30 | 0.545 | -1.000 |
| 5762 | PHR | 1546  | 0.0000864359 | 158.97 | 0.697 | -3.100 |
| 5763 | PHN | 761   | 0.0000425471 | 135.87 | 0.595 | -2.767 |
| 5764 | PHD | 781   | 0.0000436652 | 133.40 | 0.585 | -2.767 |
| 5765 | PHC | 858   | 0.0000479703 | 128.73 | 0.564 | -0.767 |
| 5766 | PHQ | 1212  | 0.0000677622 | 144.10 | 0.631 | -2.767 |

|      |     |       |              |        |       |        |
|------|-----|-------|--------------|--------|-------|--------|
| 5767 | PHE | 1102  | 0.0000616122 | 141.70 | 0.621 | -2.767 |
| 5768 | PHG | 1899  | 0.0001061720 | 115.93 | 0.508 | -1.733 |
| 5769 | PHH | 1136  | 0.0000635131 | 147.63 | 0.647 | -2.667 |
| 5770 | PHI | 1089  | 0.0000608853 | 148.93 | 0.653 | -0.100 |
| 5771 | PHL | 3152  | 0.0001762264 | 148.97 | 0.653 | -0.333 |
| 5772 | PHK | 1084  | 0.0000606058 | 150.07 | 0.658 | -2.900 |
| 5773 | PHM | 427   | 0.0000238733 | 149.97 | 0.657 | -0.967 |
| 5774 | PHF | 1121  | 0.0000626744 | 158.27 | 0.694 | -0.667 |
| 5775 | PHP | 2827  | 0.0001580559 | 135.27 | 0.593 | -2.133 |
| 5776 | PHS | 2853  | 0.0001595095 | 126.10 | 0.553 | -1.867 |
| 5777 | PHT | 1515  | 0.0000847027 | 134.80 | 0.591 | -1.833 |
| 5778 | PHW | 359   | 0.0000200715 | 170.37 | 0.747 | -1.900 |
| 5779 | PHY | 701   | 0.0000391925 | 159.97 | 0.701 | -2.033 |
| 5780 | PHV | 1552  | 0.0000867714 | 140.63 | 0.616 | -0.200 |
| 5781 | PIA | 1683  | 0.0000940955 | 125.60 | 0.550 | 1.567  |
| 5782 | PIR | 1698  | 0.0000949342 | 160.27 | 0.702 | -0.533 |
| 5783 | PIN | 1090  | 0.0000609412 | 137.17 | 0.601 | -0.200 |
| 5784 | PID | 1225  | 0.0000684890 | 134.70 | 0.590 | -0.200 |
| 5785 | PIC | 1036  | 0.0000579221 | 130.03 | 0.570 | 1.800  |
| 5786 | PIQ | 1530  | 0.0000855414 | 145.40 | 0.637 | -0.200 |
| 5787 | PIE | 1505  | 0.0000841436 | 143.00 | 0.627 | -0.200 |
| 5788 | PIG | 1714  | 0.0000958287 | 117.23 | 0.514 | 0.833  |
| 5789 | PIH | 952   | 0.0000532257 | 148.93 | 0.653 | -0.100 |
| 5790 | PII | 1986  | 0.0001110361 | 150.23 | 0.658 | 2.467  |
| 5791 | PIL | 3286  | 0.0001837183 | 150.27 | 0.658 | 2.233  |
| 5792 | PIK | 1750  | 0.0000978414 | 151.37 | 0.663 | -0.333 |
| 5793 | PIM | 686   | 0.0000383538 | 151.27 | 0.663 | 1.600  |
| 5794 | PIF | 1367  | 0.0000764282 | 159.57 | 0.699 | 1.900  |
| 5795 | PIP | 2877  | 0.0001608513 | 136.57 | 0.598 | 0.433  |
| 5796 | PIS | 3076  | 0.0001719773 | 127.40 | 0.558 | 0.700  |
| 5797 | PIT | 2564  | 0.0001433517 | 136.10 | 0.596 | 0.733  |
| 5798 | PIW | 403   | 0.0000225315 | 171.67 | 0.752 | 0.667  |
| 5799 | PIY | 1023  | 0.0000571953 | 161.27 | 0.707 | 0.533  |
| 5800 | PIV | 1957  | 0.0001094147 | 141.93 | 0.622 | 2.367  |
| 5801 | PLA | 6796  | 0.0003799603 | 125.63 | 0.551 | 1.333  |
| 5802 | PLR | 5415  | 0.0003027494 | 160.30 | 0.702 | -0.767 |
| 5803 | PLN | 2877  | 0.0001608513 | 137.20 | 0.601 | -0.433 |
| 5804 | PLD | 4315  | 0.0002412491 | 134.73 | 0.590 | -0.433 |
| 5805 | PLC | 2183  | 0.0001220502 | 130.07 | 0.570 | 1.567  |
| 5806 | PLQ | 4883  | 0.0002730056 | 145.43 | 0.637 | -0.433 |
| 5807 | PLE | 5637  | 0.0003151613 | 143.03 | 0.627 | -0.433 |
| 5808 | PLG | 6648  | 0.0003716857 | 117.27 | 0.514 | 0.600  |
| 5809 | PLH | 3366  | 0.0001881910 | 148.97 | 0.653 | -0.333 |
| 5810 | PLI | 3436  | 0.0001921047 | 150.27 | 0.658 | 2.233  |
| 5811 | PLL | 10901 | 0.0006094684 | 150.30 | 0.659 | 2.000  |
| 5812 | PLK | 3858  | 0.0002156985 | 151.40 | 0.663 | -0.567 |
| 5813 | PLM | 1753  | 0.0000980092 | 151.30 | 0.663 | 1.367  |
| 5814 | PLF | 3124  | 0.0001746610 | 159.60 | 0.699 | 1.667  |
| 5815 | PLP | 10985 | 0.0006141647 | 136.60 | 0.599 | 0.200  |
| 5816 | PLS | 8417  | 0.0004705894 | 127.43 | 0.558 | 0.467  |
| 5817 | PLT | 5357  | 0.0002995066 | 136.13 | 0.597 | 0.500  |
| 5818 | PLW | 1175  | 0.0000656935 | 171.70 | 0.752 | 0.433  |



|      |     |      |              |        |       |        |
|------|-----|------|--------------|--------|-------|--------|
| 5819 | PLY | 2086 | 0.0001166270 | 161.30 | 0.707 | 0.300  |
| 5820 | PLV | 5182 | 0.0002897225 | 141.97 | 0.622 | 2.133  |
| 5821 | PKA | 3580 | 0.0002001557 | 126.73 | 0.555 | -1.233 |
| 5822 | PKR | 2852 | 0.0001594536 | 161.40 | 0.707 | -3.333 |
| 5823 | PKN | 1605 | 0.0000897346 | 138.30 | 0.606 | -3.000 |
| 5824 | PKD | 2706 | 0.0001512908 | 135.83 | 0.595 | -3.000 |
| 5825 | PKC | 989  | 0.0000552944 | 131.17 | 0.575 | -1.000 |
| 5826 | PKQ | 1804 | 0.0001008606 | 146.53 | 0.642 | -3.000 |
| 5827 | PKE | 3851 | 0.0002153071 | 144.13 | 0.632 | -3.000 |
| 5828 | PKG | 3916 | 0.0002189412 | 118.37 | 0.519 | -1.967 |
| 5829 | PKH | 1033 | 0.0000577544 | 150.07 | 0.658 | -2.900 |
| 5830 | PKI | 2001 | 0.0001118747 | 151.37 | 0.663 | -0.333 |
| 5831 | PKL | 3549 | 0.0001984225 | 151.40 | 0.663 | -0.567 |
| 5832 | PKK | 3632 | 0.0002030629 | 152.50 | 0.668 | -3.133 |
| 5833 | PKM | 1110 | 0.0000620594 | 152.40 | 0.668 | -1.200 |
| 5834 | PKF | 1395 | 0.0000779936 | 160.70 | 0.704 | -0.900 |
| 5835 | PKP | 4370 | 0.0002443241 | 137.70 | 0.603 | -2.367 |
| 5836 | PKS | 3688 | 0.0002061939 | 128.53 | 0.563 | -2.100 |
| 5837 | PKT | 2838 | 0.0001586709 | 137.23 | 0.601 | -2.067 |
| 5838 | PKW | 451  | 0.0000252151 | 172.80 | 0.757 | -2.133 |
| 5839 | PKY | 1124 | 0.0000628422 | 162.40 | 0.712 | -2.267 |
| 5840 | PKV | 2861 | 0.0001599568 | 143.07 | 0.627 | -0.433 |
| 5841 | PMA | 1344 | 0.0000751422 | 126.63 | 0.555 | 0.700  |
| 5842 | PMR | 698  | 0.0000390248 | 161.30 | 0.707 | -1.400 |
| 5843 | PMN | 665  | 0.0000371798 | 138.20 | 0.606 | -1.067 |
| 5844 | PMD | 1036 | 0.0000579221 | 135.73 | 0.595 | -1.067 |
| 5845 | PMC | 314  | 0.0000175556 | 131.07 | 0.574 | 0.933  |
| 5846 | PMQ | 606  | 0.0000338811 | 146.43 | 0.642 | -1.067 |
| 5847 | PME | 1279 | 0.0000715081 | 144.03 | 0.631 | -1.067 |
| 5848 | PMG | 1254 | 0.0000701104 | 118.27 | 0.518 | -0.033 |
| 5849 | PMH | 378  | 0.0000211338 | 149.97 | 0.657 | -0.967 |
| 5850 | PMI | 573  | 0.0000320361 | 151.27 | 0.663 | 1.600  |
| 5851 | PML | 1554 | 0.0000868832 | 151.30 | 0.663 | 1.367  |
| 5852 | PMK | 761  | 0.0000425471 | 152.40 | 0.668 | -1.200 |
| 5853 | PMM | 449  | 0.0000251033 | 152.30 | 0.667 | 0.733  |
| 5854 | PMF | 588  | 0.0000328747 | 160.60 | 0.704 | 1.033  |
| 5855 | PMP | 1353 | 0.0000756454 | 137.60 | 0.603 | -0.433 |
| 5856 | PMS | 1303 | 0.0000728500 | 128.43 | 0.563 | -0.167 |
| 5857 | PMT | 938  | 0.0000524430 | 137.13 | 0.601 | -0.133 |
| 5858 | PMW | 163  | 0.0000091132 | 172.70 | 0.757 | -0.200 |
| 5859 | PMY | 743  | 0.0000415407 | 162.30 | 0.711 | -0.333 |
| 5860 | PMV | 1052 | 0.0000588167 | 142.97 | 0.626 | 1.500  |
| 5861 | PFA | 1844 | 0.0001030969 | 134.93 | 0.591 | 1.000  |
| 5862 | PFR | 1876 | 0.0001048860 | 169.60 | 0.743 | -1.100 |
| 5863 | PFN | 933  | 0.0000521635 | 146.50 | 0.642 | -0.767 |
| 5864 | PFD | 1319 | 0.0000737445 | 144.03 | 0.631 | -0.767 |
| 5865 | PFC | 922  | 0.0000515485 | 139.37 | 0.611 | 1.233  |
| 5866 | PFQ | 1854 | 0.0001036560 | 154.73 | 0.678 | -0.767 |
| 5867 | PFE | 1597 | 0.0000892873 | 152.33 | 0.668 | -0.767 |
| 5868 | PFG | 2070 | 0.0001157325 | 126.57 | 0.555 | 0.267  |
| 5869 | PFH | 968  | 0.0000541203 | 158.27 | 0.694 | -0.667 |
| 5870 | PFI | 1607 | 0.0000898464 | 159.57 | 0.699 | 1.900  |

|      |     |       |              |        |       |        |
|------|-----|-------|--------------|--------|-------|--------|
| 5871 | PFL | 3991  | 0.0002231344 | 159.60 | 0.699 | 1.667  |
| 5872 | PFK | 1759  | 0.0000983446 | 160.70 | 0.704 | -0.900 |
| 5873 | PFM | 590   | 0.0000329865 | 160.60 | 0.704 | 1.033  |
| 5874 | FFF | 1520  | 0.0000849823 | 168.90 | 0.740 | 1.333  |
| 5875 | FFP | 2811  | 0.0001571613 | 145.90 | 0.639 | -0.133 |
| 5876 | PFS | 3603  | 0.0002014416 | 136.73 | 0.599 | 0.133  |
| 5877 | PFT | 2017  | 0.0001127693 | 145.43 | 0.637 | 0.167  |
| 5878 | PFW | 543   | 0.0000303588 | 181.00 | 0.793 | 0.100  |
| 5879 | PFY | 1138  | 0.0000636249 | 170.60 | 0.748 | -0.033 |
| 5880 | PFV | 1891  | 0.0001057247 | 151.27 | 0.663 | 1.800  |
| 5881 | PPA | 10937 | 0.0006114811 | 111.93 | 0.491 | -0.467 |
| 5882 | PPR | 6942  | 0.0003881231 | 146.60 | 0.642 | -2.567 |
| 5883 | PPN | 2230  | 0.0001246780 | 123.50 | 0.541 | -2.233 |
| 5884 | PPD | 3601  | 0.0002013297 | 121.03 | 0.530 | -2.233 |
| 5885 | PPC | 1789  | 0.0001000219 | 116.37 | 0.510 | -0.233 |
| 5886 | PPQ | 5330  | 0.0002979971 | 131.73 | 0.577 | -2.233 |
| 5887 | PPE | 6162  | 0.0003445137 | 129.33 | 0.567 | -2.233 |
| 5888 | PPG | 12384 | 0.0006923820 | 103.57 | 0.454 | -1.200 |
| 5889 | PPH | 2527  | 0.0001412831 | 135.27 | 0.593 | -2.133 |
| 5890 | PPI | 2297  | 0.0001284239 | 136.57 | 0.598 | 0.433  |
| 5891 | PPL | 8972  | 0.0005016191 | 136.60 | 0.599 | 0.200  |
| 5892 | PPK | 4102  | 0.0002293404 | 137.70 | 0.603 | -2.367 |
| 5893 | PPM | 1373  | 0.0000767636 | 137.60 | 0.603 | -0.433 |
| 5894 | PPF | 2271  | 0.0001269702 | 145.90 | 0.639 | -0.133 |
| 5895 | PPP | 22029 | 0.0012316281 | 122.90 | 0.539 | -1.600 |
| 5896 | PPS | 10320 | 0.0005769850 | 113.73 | 0.498 | -1.333 |
| 5897 | PPT | 5854  | 0.0003272936 | 122.43 | 0.537 | -1.300 |
| 5898 | PPW | 879   | 0.0000491444 | 158.00 | 0.692 | -1.367 |
| 5899 | PPY | 1775  | 0.0000992392 | 147.60 | 0.647 | -1.500 |
| 5900 | PPV | 5562  | 0.0003109681 | 128.27 | 0.562 | 0.333  |
| 5901 | PSA | 7944  | 0.0004441443 | 102.77 | 0.450 | -0.200 |
| 5902 | PSR | 5872  | 0.0003283000 | 137.43 | 0.602 | -2.300 |
| 5903 | PSN | 2852  | 0.0001594536 | 114.33 | 0.501 | -1.967 |
| 5904 | PSD | 4155  | 0.0002323036 | 111.87 | 0.490 | -1.967 |
| 5905 | PSC | 2391  | 0.0001336794 | 107.20 | 0.470 | 0.033  |
| 5906 | PSQ | 4996  | 0.0002793234 | 122.57 | 0.537 | -1.967 |
| 5907 | PSE | 5648  | 0.0003157763 | 120.17 | 0.527 | -1.967 |
| 5908 | PSG | 7436  | 0.0004157423 | 94.40  | 0.414 | -0.933 |
| 5909 | PSH | 2543  | 0.0001421776 | 126.10 | 0.553 | -1.867 |
| 5910 | PSI | 3316  | 0.0001853956 | 127.40 | 0.558 | 0.700  |
| 5911 | PSL | 9778  | 0.0005466821 | 127.43 | 0.558 | 0.467  |
| 5912 | PSK | 3976  | 0.0002222958 | 128.53 | 0.563 | -2.100 |
| 5913 | PSM | 1626  | 0.0000909087 | 128.43 | 0.563 | -0.167 |
| 5914 | PSF | 3118  | 0.0001743255 | 136.73 | 0.599 | 0.133  |
| 5915 | PSP | 12461 | 0.0006966870 | 113.73 | 0.498 | -1.333 |
| 5916 | PSS | 12723 | 0.0007113353 | 104.57 | 0.458 | -1.067 |
| 5917 | PST | 6024  | 0.0003367982 | 113.27 | 0.496 | -1.033 |
| 5918 | PSW | 1327  | 0.0000741918 | 148.83 | 0.652 | -1.100 |
| 5919 | PSY | 2188  | 0.0001223298 | 138.43 | 0.607 | -1.233 |
| 5920 | PSV | 5613  | 0.0003138195 | 119.10 | 0.522 | 0.600  |
| 5921 | PTA | 4435  | 0.0002479582 | 111.47 | 0.488 | -0.167 |
| 5922 | PTR | 2654  | 0.0001483836 | 146.13 | 0.640 | -2.267 |

|      |     |      |              |        |       |        |
|------|-----|------|--------------|--------|-------|--------|
| 5923 | PTN | 1473 | 0.0000823545 | 123.03 | 0.539 | -1.933 |
| 5924 | PTD | 2268 | 0.0001268025 | 120.57 | 0.528 | -1.933 |
| 5925 | PTC | 1431 | 0.0000800063 | 115.90 | 0.508 | 0.067  |
| 5926 | PTQ | 2362 | 0.0001320580 | 131.27 | 0.575 | -1.933 |
| 5927 | PTE | 3335 | 0.0001864579 | 128.87 | 0.565 | -1.933 |
| 5928 | PTG | 3997 | 0.0002234699 | 103.10 | 0.452 | -0.900 |
| 5929 | PTH | 1487 | 0.0000831373 | 134.80 | 0.591 | -1.833 |
| 5930 | PTI | 2112 | 0.0001180807 | 136.10 | 0.596 | 0.733  |
| 5931 | PTL | 5228 | 0.0002922943 | 136.13 | 0.597 | 0.500  |
| 5932 | PTK | 2285 | 0.0001277530 | 137.23 | 0.601 | -2.067 |
| 5933 | PTM | 996  | 0.0000556858 | 137.13 | 0.601 | -0.133 |
| 5934 | PTF | 2030 | 0.0001134961 | 145.43 | 0.637 | 0.167  |
| 5935 | PTP | 6531 | 0.0003651443 | 122.43 | 0.537 | -1.300 |
| 5936 | PTS | 5738 | 0.0003208081 | 113.27 | 0.496 | -1.033 |
| 5937 | PTT | 3945 | 0.0002205626 | 121.97 | 0.534 | -1.000 |
| 5938 | PTW | 718  | 0.0000401429 | 157.53 | 0.690 | -1.067 |
| 5939 | PTY | 1303 | 0.0000728500 | 147.13 | 0.645 | -1.200 |
| 5940 | PTV | 3756 | 0.0002099957 | 127.80 | 0.560 | 0.633  |
| 5941 | PWA | 1066 | 0.0000595994 | 147.03 | 0.644 | -0.233 |
| 5942 | PWR | 963  | 0.0000538408 | 181.70 | 0.796 | -2.333 |
| 5943 | PWN | 570  | 0.0000318684 | 158.60 | 0.695 | -2.000 |
| 5944 | PWD | 585  | 0.0000327070 | 156.13 | 0.684 | -2.000 |
| 5945 | PWC | 302  | 0.0000168846 | 151.47 | 0.664 | 0.000  |
| 5946 | PWQ | 662  | 0.0000370120 | 166.83 | 0.731 | -2.000 |
| 5947 | PWE | 848  | 0.0000474112 | 164.43 | 0.721 | -2.000 |
| 5948 | PWG | 1181 | 0.0000660290 | 138.67 | 0.608 | -0.967 |
| 5949 | PWH | 293  | 0.0000163815 | 170.37 | 0.747 | -1.900 |
| 5950 | PWI | 566  | 0.0000316447 | 171.67 | 0.752 | 0.667  |
| 5951 | PWL | 1368 | 0.0000764841 | 171.70 | 0.752 | 0.433  |
| 5952 | PWK | 684  | 0.0000382420 | 172.80 | 0.757 | -2.133 |
| 5953 | PWM | 341  | 0.0000190651 | 172.70 | 0.757 | -0.200 |
| 5954 | PWF | 396  | 0.0000221401 | 181.00 | 0.793 | 0.100  |
| 5955 | PWP | 1071 | 0.0000598790 | 158.00 | 0.692 | -1.367 |
| 5956 | PWS | 993  | 0.0000555180 | 148.83 | 0.652 | -1.100 |
| 5957 | PWT | 788  | 0.0000440566 | 157.53 | 0.690 | -1.067 |
| 5958 | PWW | 249  | 0.0000139214 | 193.10 | 0.846 | -1.133 |
| 5959 | PWY | 298  | 0.0000166610 | 182.70 | 0.801 | -1.267 |
| 5960 | PWV | 871  | 0.0000486971 | 163.37 | 0.716 | 0.567  |
| 5961 | PYA | 1418 | 0.0000792795 | 136.63 | 0.599 | -0.367 |
| 5962 | PYR | 1432 | 0.0000800623 | 171.30 | 0.751 | -2.467 |
| 5963 | PYN | 855  | 0.0000478025 | 148.20 | 0.649 | -2.133 |
| 5964 | PYD | 952  | 0.0000532257 | 145.73 | 0.639 | -2.133 |
| 5965 | PYC | 692  | 0.0000386893 | 141.07 | 0.618 | -0.133 |
| 5966 | PYQ | 1212 | 0.0000677622 | 156.43 | 0.686 | -2.133 |
| 5967 | PYE | 2834 | 0.0001584472 | 154.03 | 0.675 | -2.133 |
| 5968 | PYG | 1621 | 0.0000906291 | 128.27 | 0.562 | -1.100 |
| 5969 | PYH | 731  | 0.0000408698 | 159.97 | 0.701 | -2.033 |
| 5970 | PYI | 1111 | 0.0000621153 | 161.27 | 0.707 | 0.533  |
| 5971 | PYL | 2337 | 0.0001306603 | 161.30 | 0.707 | 0.300  |
| 5972 | PYK | 3287 | 0.0001837742 | 162.40 | 0.712 | -2.267 |
| 5973 | PYM | 541  | 0.0000302470 | 162.30 | 0.711 | -0.333 |
| 5974 | PYF | 1115 | 0.0000623390 | 170.60 | 0.748 | -0.033 |

|      |     |       |              |        |       |        |
|------|-----|-------|--------------|--------|-------|--------|
| 5975 | PYP | 1934  | 0.0001081288 | 147.60 | 0.647 | -1.500 |
| 5976 | PYS | 2247  | 0.0001256284 | 138.43 | 0.607 | -1.233 |
| 5977 | PYT | 1527  | 0.0000853737 | 147.13 | 0.645 | -1.200 |
| 5978 | PYW | 377   | 0.0000210778 | 182.70 | 0.801 | -1.267 |
| 5979 | PYY | 847   | 0.0000473553 | 172.30 | 0.755 | -1.400 |
| 5980 | PYV | 1641  | 0.0000917473 | 152.97 | 0.670 | 0.433  |
| 5981 | PVA | 4824  | 0.0002697069 | 117.30 | 0.514 | 1.467  |
| 5982 | PVR | 3282  | 0.0001834946 | 151.97 | 0.666 | -0.633 |
| 5983 | PVN | 2039  | 0.0001139993 | 128.87 | 0.565 | -0.300 |
| 5984 | PVD | 2919  | 0.0001631995 | 126.40 | 0.554 | -0.300 |
| 5985 | PVC | 1723  | 0.0000963319 | 121.73 | 0.533 | 1.700  |
| 5986 | PVQ | 3025  | 0.0001691259 | 137.10 | 0.601 | -0.300 |
| 5987 | PVE | 3576  | 0.0001999320 | 134.70 | 0.590 | -0.300 |
| 5988 | PVG | 4304  | 0.0002406341 | 108.93 | 0.477 | 0.733  |
| 5989 | PVH | 1752  | 0.0000979533 | 140.63 | 0.616 | -0.200 |
| 5990 | PVI | 3008  | 0.0001681755 | 141.93 | 0.622 | 2.367  |
| 5991 | PVL | 6838  | 0.0003823085 | 141.97 | 0.622 | 2.133  |
| 5992 | PVK | 2895  | 0.0001618577 | 143.07 | 0.627 | -0.433 |
| 5993 | PVM | 1191  | 0.0000665881 | 142.97 | 0.626 | 1.500  |
| 5994 | PVF | 2584  | 0.0001444699 | 151.27 | 0.663 | 1.800  |
| 5995 | PVP | 6631  | 0.0003707352 | 128.27 | 0.562 | 0.333  |
| 5996 | PVS | 6443  | 0.0003602243 | 119.10 | 0.522 | 0.600  |
| 5997 | PVT | 5061  | 0.0002829575 | 127.80 | 0.560 | 0.633  |
| 5998 | PVW | 717   | 0.0000400870 | 163.37 | 0.716 | 0.567  |
| 5999 | PVY | 1694  | 0.0000947105 | 152.97 | 0.670 | 0.433  |
| 6000 | PVV | 4598  | 0.0002570714 | 133.63 | 0.586 | 2.267  |
| 6001 | SAA | 9319  | 0.0005210197 | 91.80  | 0.402 | 0.933  |
| 6002 | SAR | 4923  | 0.0002752420 | 126.47 | 0.554 | -1.167 |
| 6003 | SAN | 2565  | 0.0001434076 | 103.37 | 0.453 | -0.833 |
| 6004 | SAD | 4069  | 0.0002274953 | 100.90 | 0.442 | -0.833 |
| 6005 | SAC | 1845  | 0.0001031528 | 96.23  | 0.422 | 1.167  |
| 6006 | SAQ | 4189  | 0.0002342045 | 111.60 | 0.489 | -0.833 |
| 6007 | SAE | 6006  | 0.0003357918 | 109.20 | 0.479 | -0.833 |
| 6008 | SAG | 7047  | 0.0003939935 | 83.43  | 0.366 | 0.200  |
| 6009 | SAH | 2237  | 0.0001250693 | 115.13 | 0.505 | -0.733 |
| 6010 | SAI | 3556  | 0.0001988138 | 116.43 | 0.510 | 1.833  |
| 6011 | SAL | 9935  | 0.0005554599 | 116.47 | 0.510 | 1.600  |
| 6012 | SAK | 3789  | 0.0002118407 | 117.57 | 0.515 | -0.967 |
| 6013 | SAM | 1805  | 0.0001009165 | 117.47 | 0.515 | 0.967  |
| 6014 | SAF | 3513  | 0.0001964097 | 125.77 | 0.551 | 1.267  |
| 6015 | SAP | 7782  | 0.0004350870 | 102.77 | 0.450 | -0.200 |
| 6016 | SAS | 10676 | 0.0005968888 | 93.60  | 0.410 | 0.067  |
| 6017 | SAT | 5652  | 0.0003159999 | 102.30 | 0.448 | 0.100  |
| 6018 | SAW | 1156  | 0.0000646313 | 137.87 | 0.604 | 0.033  |
| 6019 | SAY | 1962  | 0.0001096942 | 127.47 | 0.559 | -0.100 |
| 6020 | SAV | 5998  | 0.0003353446 | 108.13 | 0.474 | 1.733  |
| 6021 | SRA | 6199  | 0.0003465824 | 126.47 | 0.554 | -1.167 |
| 6022 | SRR | 6471  | 0.0003617897 | 161.13 | 0.706 | -3.267 |
| 6023 | SRN | 2935  | 0.0001640941 | 138.03 | 0.605 | -2.933 |
| 6024 | SRD | 4085  | 0.0002283899 | 135.57 | 0.594 | -2.933 |
| 6025 | SRC | 1642  | 0.0000918032 | 130.90 | 0.574 | -0.933 |
| 6026 | SRQ | 3470  | 0.0001940056 | 146.27 | 0.641 | -2.933 |

|      |     |      |              |        |       |        |
|------|-----|------|--------------|--------|-------|--------|
| 6027 | SRE | 5519 | 0.0003085640 | 143.87 | 0.630 | -2.933 |
| 6028 | SRG | 6418 | 0.0003588265 | 118.10 | 0.518 | -1.900 |
| 6029 | SRH | 2388 | 0.0001335117 | 149.80 | 0.656 | -2.833 |
| 6030 | SRI | 3262 | 0.0001823765 | 151.10 | 0.662 | -0.267 |
| 6031 | SRL | 7843 | 0.0004384974 | 151.13 | 0.662 | -0.500 |
| 6032 | SRK | 4427 | 0.0002475109 | 152.23 | 0.667 | -3.067 |
| 6033 | SRM | 1403 | 0.0000784409 | 152.13 | 0.667 | -1.133 |
| 6034 | SRF | 2609 | 0.0001458676 | 160.43 | 0.703 | -0.833 |
| 6035 | SRP | 5749 | 0.0003214231 | 137.43 | 0.602 | -2.300 |
| 6036 | SRS | 9365 | 0.0005235915 | 128.27 | 0.562 | -2.033 |
| 6037 | SRT | 4427 | 0.0002475109 | 136.97 | 0.600 | -2.000 |
| 6038 | SRW | 1051 | 0.0000587608 | 172.53 | 0.756 | -2.067 |
| 6039 | SRY | 1772 | 0.0000990715 | 162.13 | 0.710 | -2.200 |
| 6040 | SRV | 4424 | 0.0002473432 | 142.80 | 0.626 | -0.367 |
| 6041 | SNA | 2433 | 0.0001360276 | 103.37 | 0.453 | -0.833 |
| 6042 | SNR | 2045 | 0.0001143347 | 138.03 | 0.605 | -2.933 |
| 6043 | SNN | 1929 | 0.0001078492 | 114.93 | 0.504 | -2.600 |
| 6044 | SND | 1655 | 0.0000925301 | 112.47 | 0.493 | -2.600 |
| 6045 | SNC | 1056 | 0.0000590403 | 107.80 | 0.472 | -0.600 |
| 6046 | SNQ | 1935 | 0.0001081847 | 123.17 | 0.540 | -2.600 |
| 6047 | SNE | 2144 | 0.0001198698 | 120.77 | 0.529 | -2.600 |
| 6048 | SNG | 3020 | 0.0001688464 | 95.00  | 0.416 | -1.567 |
| 6049 | SNH | 1133 | 0.0000633454 | 126.70 | 0.555 | -2.500 |
| 6050 | SNI | 2601 | 0.0001454203 | 128.00 | 0.561 | 0.067  |
| 6051 | SNL | 5427 | 0.0003034203 | 128.03 | 0.561 | -0.167 |
| 6052 | SNK | 2381 | 0.0001331203 | 129.13 | 0.566 | -2.733 |
| 6053 | SNM | 1139 | 0.0000636808 | 129.03 | 0.565 | -0.800 |
| 6054 | SNF | 1776 | 0.0000992951 | 137.33 | 0.602 | -0.500 |
| 6055 | SNP | 3262 | 0.0001823765 | 114.33 | 0.501 | -1.967 |
| 6056 | SNS | 4976 | 0.0002782052 | 105.17 | 0.461 | -1.700 |
| 6057 | SNT | 2704 | 0.0001511790 | 113.87 | 0.499 | -1.667 |
| 6058 | SNW | 588  | 0.0000328747 | 149.43 | 0.655 | -1.733 |
| 6059 | SNY | 1351 | 0.0000755336 | 139.03 | 0.609 | -1.867 |
| 6060 | SNV | 2718 | 0.0001519618 | 119.70 | 0.525 | -0.033 |
| 6061 | SDA | 3584 | 0.0002003793 | 100.90 | 0.442 | -0.833 |
| 6062 | SDR | 2775 | 0.0001551486 | 135.57 | 0.594 | -2.933 |
| 6063 | SDN | 2103 | 0.0001175775 | 112.47 | 0.493 | -2.600 |
| 6064 | SDD | 3685 | 0.0002060261 | 110.00 | 0.482 | -2.600 |
| 6065 | SDC | 1454 | 0.0000812923 | 105.33 | 0.462 | -0.600 |
| 6066 | SDQ | 2305 | 0.0001288712 | 120.70 | 0.529 | -2.600 |
| 6067 | SDE | 4523 | 0.0002528782 | 118.30 | 0.518 | -2.600 |
| 6068 | SDG | 4380 | 0.0002448832 | 92.53  | 0.405 | -1.567 |
| 6069 | SDH | 1564 | 0.0000874423 | 124.23 | 0.544 | -2.500 |
| 6070 | SDI | 3146 | 0.0001758910 | 125.53 | 0.550 | 0.067  |
| 6071 | SDL | 6468 | 0.0003616220 | 125.57 | 0.550 | -0.167 |
| 6072 | SDK | 3013 | 0.0001684550 | 126.67 | 0.555 | -2.733 |
| 6073 | SDM | 1187 | 0.0000663645 | 126.57 | 0.555 | -0.800 |
| 6074 | SDF | 2617 | 0.0001463149 | 134.87 | 0.591 | -0.500 |
| 6075 | SDP | 4478 | 0.0002503623 | 111.87 | 0.490 | -1.967 |
| 6076 | SDS | 7872 | 0.0004401188 | 102.70 | 0.450 | -1.700 |
| 6077 | SDT | 3591 | 0.0002007706 | 111.40 | 0.488 | -1.667 |
| 6078 | SDW | 835  | 0.0000466843 | 146.97 | 0.644 | -1.733 |

|      |     |      |              |        |       |        |
|------|-----|------|--------------|--------|-------|--------|
| 6079 | SDY | 1825 | 0.0001020347 | 136.57 | 0.598 | -1.867 |
| 6080 | SDV | 3845 | 0.0002149716 | 117.23 | 0.514 | -0.033 |
| 6081 | SCA | 1858 | 0.0001038797 | 96.23  | 0.422 | 1.167  |
| 6082 | SCR | 1870 | 0.0001045506 | 130.90 | 0.574 | -0.933 |
| 6083 | SCN | 1018 | 0.0000569158 | 107.80 | 0.472 | -0.600 |
| 6084 | SCD | 1440 | 0.0000805095 | 105.33 | 0.462 | -0.600 |
| 6085 | SCC | 1686 | 0.0000942632 | 100.67 | 0.441 | 1.400  |
| 6086 | SCQ | 1848 | 0.0001033206 | 116.03 | 0.508 | -0.600 |
| 6087 | SCE | 1737 | 0.0000971146 | 113.63 | 0.498 | -0.600 |
| 6088 | SCG | 2638 | 0.0001474890 | 87.87  | 0.385 | 0.433  |
| 6089 | SCH | 1054 | 0.0000589285 | 119.57 | 0.524 | -0.500 |
| 6090 | SCI | 1302 | 0.0000727940 | 120.87 | 0.530 | 2.067  |
| 6091 | SCL | 3646 | 0.0002038457 | 120.90 | 0.530 | 1.833  |
| 6092 | SCK | 1579 | 0.0000882809 | 122.00 | 0.535 | -0.733 |
| 6093 | SCM | 557  | 0.0000311415 | 121.90 | 0.534 | 1.200  |
| 6094 | SCF | 1389 | 0.0000776582 | 130.20 | 0.571 | 1.500  |
| 6095 | SCP | 2693 | 0.0001505640 | 107.20 | 0.470 | 0.033  |
| 6096 | SCS | 4031 | 0.0002253708 | 98.03  | 0.430 | 0.300  |
| 6097 | SCT | 1747 | 0.0000976737 | 106.73 | 0.468 | 0.333  |
| 6098 | SCW | 436  | 0.0000243765 | 142.30 | 0.624 | 0.267  |
| 6099 | SCY | 851  | 0.0000475789 | 131.90 | 0.578 | 0.133  |
| 6100 | SCV | 1950 | 0.0001090233 | 112.57 | 0.493 | 1.967  |
| 6101 | SQA | 5389 | 0.0003012957 | 111.60 | 0.489 | -0.833 |
| 6102 | SQR | 3951 | 0.0002208980 | 146.27 | 0.641 | -2.933 |
| 6103 | SQN | 2408 | 0.0001346298 | 123.17 | 0.540 | -2.600 |
| 6104 | SQD | 3460 | 0.0001934465 | 120.70 | 0.529 | -2.600 |
| 6105 | SQC | 1361 | 0.0000760927 | 116.03 | 0.508 | -0.600 |
| 6106 | SQQ | 3554 | 0.0001987020 | 131.40 | 0.576 | -2.600 |
| 6107 | SQE | 5798 | 0.0003241627 | 129.00 | 0.565 | -2.600 |
| 6108 | SQG | 4772 | 0.0002667996 | 103.23 | 0.452 | -1.567 |
| 6109 | SQH | 1856 | 0.0001037678 | 134.93 | 0.591 | -2.500 |
| 6110 | SQI | 2571 | 0.0001437431 | 136.23 | 0.597 | 0.067  |
| 6111 | SQL | 6505 | 0.0003636906 | 136.27 | 0.597 | -0.167 |
| 6112 | SQK | 3652 | 0.0002041811 | 137.37 | 0.602 | -2.733 |
| 6113 | SQM | 1424 | 0.0000796150 | 137.27 | 0.602 | -0.800 |
| 6114 | SQF | 1763 | 0.0000985683 | 145.57 | 0.638 | -0.500 |
| 6115 | SQP | 5321 | 0.0002974939 | 122.57 | 0.537 | -1.967 |
| 6116 | SQS | 5900 | 0.0003298655 | 113.40 | 0.497 | -1.700 |
| 6117 | SQT | 3517 | 0.0001966334 | 122.10 | 0.535 | -1.667 |
| 6118 | SQW | 694  | 0.0000388011 | 157.67 | 0.691 | -1.733 |
| 6119 | SQY | 1461 | 0.0000816836 | 147.27 | 0.645 | -1.867 |
| 6120 | SQV | 3984 | 0.0002227431 | 127.93 | 0.561 | -0.033 |
| 6121 | SEA | 6767 | 0.0003783389 | 109.20 | 0.479 | -0.833 |
| 6122 | SER | 4563 | 0.0002551146 | 143.87 | 0.630 | -2.933 |
| 6123 | SEN | 3993 | 0.0002232462 | 120.77 | 0.529 | -2.600 |
| 6124 | SED | 6329 | 0.0003538506 | 118.30 | 0.518 | -2.600 |
| 6125 | SEC | 2018 | 0.0001128252 | 113.63 | 0.498 | -0.600 |
| 6126 | SEQ | 3426 | 0.0001915456 | 129.00 | 0.565 | -2.600 |
| 6127 | SEE | 9561 | 0.0005345498 | 126.60 | 0.555 | -2.600 |
| 6128 | SEG | 5830 | 0.0003259518 | 100.83 | 0.442 | -1.567 |
| 6129 | SEH | 1837 | 0.0001027056 | 132.53 | 0.581 | -2.500 |
| 6130 | SEI | 3755 | 0.0002099398 | 133.83 | 0.586 | 0.067  |

|      |     |       |              |        |       |        |
|------|-----|-------|--------------|--------|-------|--------|
| 6131 | SEL | 7829  | 0.0004377147 | 133.87 | 0.587 | -0.167 |
| 6132 | SEK | 5825  | 0.0003256722 | 134.97 | 0.591 | -2.733 |
| 6133 | SEM | 1836  | 0.0001026497 | 134.87 | 0.591 | -0.800 |
| 6134 | SEF | 2296  | 0.0001283680 | 143.17 | 0.627 | -0.500 |
| 6135 | SEP | 5044  | 0.0002820070 | 120.17 | 0.527 | -1.967 |
| 6136 | SES | 7247  | 0.0004051754 | 111.00 | 0.486 | -1.700 |
| 6137 | SET | 5604  | 0.0003133163 | 119.70 | 0.525 | -1.667 |
| 6138 | SEW | 886   | 0.0000495357 | 155.27 | 0.680 | -1.733 |
| 6139 | SEY | 1802  | 0.0001007487 | 144.87 | 0.635 | -1.867 |
| 6140 | SEV | 4938  | 0.0002760806 | 125.53 | 0.550 | -0.033 |
| 6141 | SGA | 7272  | 0.0004065731 | 83.43  | 0.366 | 0.200  |
| 6142 | SGR | 6015  | 0.0003362951 | 118.10 | 0.518 | -1.900 |
| 6143 | SGN | 3758  | 0.0002101075 | 95.00  | 0.416 | -1.567 |
| 6144 | SGD | 4776  | 0.0002670233 | 92.53  | 0.405 | -1.567 |
| 6145 | SGC | 2154  | 0.0001204288 | 87.87  | 0.385 | 0.433  |
| 6146 | SGQ | 4264  | 0.0002383977 | 103.23 | 0.452 | -1.567 |
| 6147 | SGE | 6400  | 0.0003578202 | 100.83 | 0.442 | -1.567 |
| 6148 | SGG | 8514  | 0.0004760126 | 75.07  | 0.329 | -0.533 |
| 6149 | SGH | 2756  | 0.0001540863 | 106.77 | 0.468 | -1.467 |
| 6150 | SGI | 4031  | 0.0002253708 | 108.07 | 0.474 | 1.100  |
| 6151 | SGL | 9147  | 0.0005114033 | 108.10 | 0.474 | 0.867  |
| 6152 | SGK | 5547  | 0.0003101294 | 109.20 | 0.479 | -1.700 |
| 6153 | SGM | 1762  | 0.0000985124 | 109.10 | 0.478 | 0.233  |
| 6154 | SGF | 3424  | 0.0001914338 | 117.40 | 0.514 | 0.533  |
| 6155 | SGP | 7043  | 0.0003937699 | 94.40  | 0.414 | -0.933 |
| 6156 | SGS | 11604 | 0.0006487727 | 85.23  | 0.374 | -0.667 |
| 6157 | SGT | 5956  | 0.0003329964 | 93.93  | 0.412 | -0.633 |
| 6158 | SGW | 1270  | 0.0000710049 | 129.50 | 0.567 | -0.700 |
| 6159 | SGY | 2493  | 0.0001393821 | 119.10 | 0.522 | -0.833 |
| 6160 | SGV | 5246  | 0.0002933007 | 99.77  | 0.437 | 1.000  |
| 6161 | SHA | 1806  | 0.0001009724 | 115.13 | 0.505 | -0.733 |
| 6162 | SHR | 2439  | 0.0001363630 | 149.80 | 0.656 | -2.833 |
| 6163 | SHN | 1207  | 0.0000674826 | 126.70 | 0.555 | -2.500 |
| 6164 | SHD | 1309  | 0.0000731854 | 124.23 | 0.544 | -2.500 |
| 6165 | SHC | 1062  | 0.0000593758 | 119.57 | 0.524 | -0.500 |
| 6166 | SHQ | 1746  | 0.0000976178 | 134.93 | 0.591 | -2.500 |
| 6167 | SHE | 1729  | 0.0000966674 | 132.53 | 0.581 | -2.500 |
| 6168 | SHG | 2480  | 0.0001386553 | 106.77 | 0.468 | -1.467 |
| 6169 | SHH | 1481  | 0.0000828018 | 138.47 | 0.607 | -2.400 |
| 6170 | SHI | 1659  | 0.0000927537 | 139.77 | 0.612 | 0.167  |
| 6171 | SHL | 5494  | 0.0003071663 | 139.80 | 0.613 | -0.067 |
| 6172 | SHK | 1591  | 0.0000889519 | 140.90 | 0.617 | -2.633 |
| 6173 | SHM | 763   | 0.0000426589 | 140.80 | 0.617 | -0.700 |
| 6174 | SHF | 1650  | 0.0000922505 | 149.10 | 0.653 | -0.400 |
| 6175 | SHP | 2768  | 0.0001547572 | 126.10 | 0.553 | -1.867 |
| 6176 | SHS | 4684  | 0.0002618796 | 116.93 | 0.512 | -1.600 |
| 6177 | SHT | 2231  | 0.0001247339 | 125.63 | 0.551 | -1.567 |
| 6178 | SHW | 530   | 0.0000296320 | 161.20 | 0.706 | -1.633 |
| 6179 | SHY | 982   | 0.0000549030 | 150.80 | 0.661 | -1.767 |
| 6180 | SHV | 1948  | 0.0001089115 | 131.47 | 0.576 | 0.067  |
| 6181 | SIA | 3113  | 0.0001740460 | 116.43 | 0.510 | 1.833  |
| 6182 | SIR | 2798  | 0.0001564345 | 151.10 | 0.662 | -0.267 |

|      |     |       |              |        |       |        |
|------|-----|-------|--------------|--------|-------|--------|
| 6183 | SIN | 2235  | 0.0001249575 | 128.00 | 0.561 | 0.067  |
| 6184 | SID | 2305  | 0.0001288712 | 125.53 | 0.550 | 0.067  |
| 6185 | SIC | 1440  | 0.0000805095 | 120.87 | 0.530 | 2.067  |
| 6186 | SIQ | 2655  | 0.0001484395 | 136.23 | 0.597 | 0.067  |
| 6187 | SIE | 2715  | 0.0001517940 | 133.83 | 0.586 | 0.067  |
| 6188 | SIG | 2783  | 0.0001555959 | 108.07 | 0.474 | 1.100  |
| 6189 | SIH | 1847  | 0.0001032647 | 139.77 | 0.612 | 0.167  |
| 6190 | SII | 2840  | 0.0001587827 | 141.07 | 0.618 | 2.733  |
| 6191 | SIL | 6162  | 0.0003445137 | 141.10 | 0.618 | 2.500  |
| 6192 | SIK | 2628  | 0.0001469299 | 142.20 | 0.623 | -0.067 |
| 6193 | SIM | 1224  | 0.0000684331 | 142.10 | 0.623 | 1.867  |
| 6194 | SIF | 2486  | 0.0001389908 | 150.40 | 0.659 | 2.167  |
| 6195 | SIP | 3847  | 0.0002150835 | 127.40 | 0.558 | 0.700  |
| 6196 | SIS | 5623  | 0.0003143786 | 118.23 | 0.518 | 0.967  |
| 6197 | SIT | 3462  | 0.0001935583 | 126.93 | 0.556 | 1.000  |
| 6198 | SIW | 639   | 0.0000357261 | 162.50 | 0.712 | 0.933  |
| 6199 | SIY | 1666  | 0.0000931451 | 152.10 | 0.667 | 0.800  |
| 6200 | SIV | 3156  | 0.0001764501 | 132.77 | 0.582 | 2.633  |
| 6201 | SLA | 10172 | 0.0005687104 | 116.47 | 0.510 | 1.600  |
| 6202 | SLR | 8444  | 0.0004720990 | 151.13 | 0.662 | -0.500 |
| 6203 | SLN | 4599  | 0.0002571273 | 128.03 | 0.561 | -0.167 |
| 6204 | SLD | 6988  | 0.0003906949 | 125.57 | 0.550 | -0.167 |
| 6205 | SLC | 3160  | 0.0001766737 | 120.90 | 0.530 | 1.833  |
| 6206 | SLQ | 8132  | 0.0004546552 | 136.27 | 0.597 | -0.167 |
| 6207 | SLE | 9983  | 0.0005581435 | 133.87 | 0.587 | -0.167 |
| 6208 | SLG | 9944  | 0.0005559631 | 108.10 | 0.474 | 0.867  |
| 6209 | SLH | 3898  | 0.0002179348 | 139.80 | 0.613 | -0.067 |
| 6210 | SLI | 5415  | 0.0003027494 | 141.10 | 0.618 | 2.500  |
| 6211 | SLL | 15834 | 0.0008852694 | 141.13 | 0.618 | 2.267  |
| 6212 | SLK | 7328  | 0.0004097041 | 142.23 | 0.623 | -0.300 |
| 6213 | SLM | 2473  | 0.0001382639 | 142.13 | 0.623 | 1.633  |
| 6214 | SLF | 5081  | 0.0002840756 | 150.43 | 0.659 | 1.933  |
| 6215 | SLP | 10953 | 0.0006123757 | 127.43 | 0.558 | 0.467  |
| 6216 | SLS | 13839 | 0.0007737302 | 118.27 | 0.518 | 0.733  |
| 6217 | SLT | 7784  | 0.0004351988 | 126.97 | 0.556 | 0.767  |
| 6218 | SLW | 1701  | 0.0000951019 | 162.53 | 0.712 | 0.700  |
| 6219 | SLY | 3357  | 0.0001876879 | 152.13 | 0.667 | 0.567  |
| 6220 | SLV | 7837  | 0.0004381620 | 132.80 | 0.582 | 2.400  |
| 6221 | SKA | 4946  | 0.0002765279 | 117.57 | 0.515 | -0.967 |
| 6222 | SKR | 3875  | 0.0002166489 | 152.23 | 0.667 | -3.067 |
| 6223 | SKN | 2570  | 0.0001436872 | 129.13 | 0.566 | -2.733 |
| 6224 | SKD | 3664  | 0.0002048520 | 126.67 | 0.555 | -2.733 |
| 6225 | SKC | 1276  | 0.0000713404 | 122.00 | 0.535 | -0.733 |
| 6226 | SKQ | 2719  | 0.0001520177 | 137.37 | 0.602 | -2.733 |
| 6227 | SKE | 5788  | 0.0003236036 | 134.97 | 0.591 | -2.733 |
| 6228 | SKG | 4216  | 0.0002357140 | 109.20 | 0.479 | -1.700 |
| 6229 | SKH | 1568  | 0.0000876659 | 140.90 | 0.617 | -2.633 |
| 6230 | SKI | 3229  | 0.0001805315 | 142.20 | 0.623 | -0.067 |
| 6231 | SKL | 6196  | 0.0003464146 | 142.23 | 0.623 | -0.300 |
| 6232 | SKK | 5065  | 0.0002831811 | 143.33 | 0.628 | -2.867 |
| 6233 | SKM | 1579  | 0.0000882809 | 143.23 | 0.628 | -0.933 |
| 6234 | SKF | 2174  | 0.0001215470 | 151.53 | 0.664 | -0.633 |



|      |     |       |              |        |       |        |
|------|-----|-------|--------------|--------|-------|--------|
| 6235 | SKP | 4372  | 0.0002444359 | 128.53 | 0.563 | -2.100 |
| 6236 | SKS | 5826  | 0.0003257281 | 119.37 | 0.523 | -1.833 |
| 6237 | SKT | 4032  | 0.0002254267 | 128.07 | 0.561 | -1.800 |
| 6238 | SKW | 697   | 0.0000389689 | 163.63 | 0.717 | -1.867 |
| 6239 | SKY | 1819  | 0.0001016992 | 153.23 | 0.671 | -2.000 |
| 6240 | SKV | 3940  | 0.0002202830 | 133.90 | 0.587 | -0.167 |
| 6241 | SMA | 2080  | 0.0001162916 | 117.47 | 0.515 | 0.967  |
| 6242 | SMR | 1124  | 0.0000628422 | 152.13 | 0.667 | -1.133 |
| 6243 | SMN | 1019  | 0.0000569717 | 129.03 | 0.565 | -0.800 |
| 6244 | SMD | 1558  | 0.0000871068 | 126.57 | 0.555 | -0.800 |
| 6245 | SMC | 464   | 0.0000259420 | 121.90 | 0.534 | 1.200  |
| 6246 | SMQ | 970   | 0.0000542321 | 137.27 | 0.602 | -0.800 |
| 6247 | SME | 1966  | 0.0001099179 | 134.87 | 0.591 | -0.800 |
| 6248 | SMG | 1560  | 0.0000872187 | 109.10 | 0.478 | 0.233  |
| 6249 | SMH | 569   | 0.0000318124 | 140.80 | 0.617 | -0.700 |
| 6250 | SMI | 1064  | 0.0000594876 | 142.10 | 0.623 | 1.867  |
| 6251 | SML | 2076  | 0.0001160679 | 142.13 | 0.623 | 1.633  |
| 6252 | SMK | 1509  | 0.0000843673 | 143.23 | 0.628 | -0.933 |
| 6253 | SMM | 628   | 0.0000351111 | 143.13 | 0.627 | 1.000  |
| 6254 | SMF | 836   | 0.0000467403 | 151.43 | 0.664 | 1.300  |
| 6255 | SMP | 1682  | 0.0000940396 | 128.43 | 0.563 | -0.167 |
| 6256 | SMS | 2066  | 0.0001155088 | 119.27 | 0.523 | 0.100  |
| 6257 | SMT | 1388  | 0.0000776022 | 127.97 | 0.561 | 0.133  |
| 6258 | SMW | 265   | 0.0000148160 | 163.53 | 0.717 | 0.067  |
| 6259 | SMY | 607   | 0.0000339370 | 153.13 | 0.671 | -0.067 |
| 6260 | SMV | 1601  | 0.0000895109 | 133.80 | 0.586 | 1.767  |
| 6261 | SFA | 2715  | 0.0001517940 | 125.77 | 0.551 | 1.267  |
| 6262 | SFR | 3074  | 0.0001718655 | 160.43 | 0.703 | -0.833 |
| 6263 | SFN | 1830  | 0.0001023142 | 137.33 | 0.602 | -0.500 |
| 6264 | SFD | 2243  | 0.0001254048 | 134.87 | 0.591 | -0.500 |
| 6265 | SFC | 1608  | 0.0000899023 | 130.20 | 0.571 | 1.500  |
| 6266 | SFQ | 2811  | 0.0001571613 | 145.57 | 0.638 | -0.500 |
| 6267 | SFE | 2650  | 0.0001481599 | 143.17 | 0.627 | -0.500 |
| 6268 | SFG | 3171  | 0.0001772887 | 117.40 | 0.514 | 0.533  |
| 6269 | SFH | 1674  | 0.0000935923 | 149.10 | 0.653 | -0.400 |
| 6270 | SFI | 2513  | 0.0001405003 | 150.40 | 0.659 | 2.167  |
| 6271 | SFL | 6350  | 0.0003550247 | 150.43 | 0.659 | 1.933  |
| 6272 | SFK | 2348  | 0.0001312753 | 151.53 | 0.664 | -0.633 |
| 6273 | SFM | 975   | 0.0000545117 | 151.43 | 0.664 | 1.300  |
| 6274 | SFF | 2382  | 0.0001331762 | 159.73 | 0.700 | 1.600  |
| 6275 | SFP | 3455  | 0.0001931670 | 136.73 | 0.599 | 0.133  |
| 6276 | SFS | 6227  | 0.0003481478 | 127.57 | 0.559 | 0.400  |
| 6277 | SFT | 3132  | 0.0001751082 | 136.27 | 0.597 | 0.433  |
| 6278 | SFW | 705   | 0.0000394161 | 171.83 | 0.753 | 0.367  |
| 6279 | SFY | 1714  | 0.0000958287 | 161.43 | 0.707 | 0.233  |
| 6280 | SFV | 2828  | 0.0001581118 | 142.10 | 0.623 | 2.067  |
| 6281 | SPA | 10286 | 0.0005750841 | 102.77 | 0.450 | -0.200 |
| 6282 | SPR | 6437  | 0.0003598888 | 137.43 | 0.602 | -2.300 |
| 6283 | SPN | 2855  | 0.0001596213 | 114.33 | 0.501 | -1.967 |
| 6284 | SPD | 4829  | 0.0002699865 | 111.87 | 0.490 | -1.967 |
| 6285 | SPC | 2253  | 0.0001259639 | 107.20 | 0.470 | 0.033  |
| 6286 | SPQ | 4933  | 0.0002758011 | 122.57 | 0.537 | -1.967 |

|      |     |       |              |        |       |        |
|------|-----|-------|--------------|--------|-------|--------|
| 6287 | SPE | 7943  | 0.0004440884 | 120.17 | 0.527 | -1.967 |
| 6288 | SPG | 10114 | 0.0005654677 | 94.40  | 0.414 | -0.933 |
| 6289 | SPH | 2596  | 0.0001451408 | 126.10 | 0.553 | -1.867 |
| 6290 | SPI | 2974  | 0.0001662745 | 127.40 | 0.558 | 0.700  |
| 6291 | SPL | 9093  | 0.0005083842 | 127.43 | 0.558 | 0.467  |
| 6292 | SPK | 4405  | 0.0002462809 | 128.53 | 0.563 | -2.100 |
| 6293 | SPM | 1627  | 0.0000909646 | 128.43 | 0.563 | -0.167 |
| 6294 | SPF | 3124  | 0.0001746610 | 136.73 | 0.599 | 0.133  |
| 6295 | SPP | 9606  | 0.0005370657 | 113.73 | 0.498 | -1.333 |
| 6296 | SPS | 12506 | 0.0006992029 | 104.57 | 0.458 | -1.067 |
| 6297 | SPT | 6280  | 0.0003511110 | 113.27 | 0.496 | -1.033 |
| 6298 | SPW | 1248  | 0.0000697749 | 148.83 | 0.652 | -1.100 |
| 6299 | SPY | 2163  | 0.0001209320 | 138.43 | 0.607 | -1.233 |
| 6300 | SPV | 6532  | 0.0003652002 | 119.10 | 0.522 | 0.600  |
| 6301 | SSA | 10877 | 0.0006081265 | 93.60  | 0.410 | 0.067  |
| 6302 | SSR | 8566  | 0.0004789199 | 128.27 | 0.562 | -2.033 |
| 6303 | SSN | 5219  | 0.0002917912 | 105.17 | 0.461 | -1.700 |
| 6304 | SSD | 7345  | 0.0004106546 | 102.70 | 0.450 | -1.700 |
| 6305 | SSC | 4151  | 0.0002320799 | 98.03  | 0.430 | 0.300  |
| 6306 | SSQ | 7074  | 0.0003955031 | 113.40 | 0.497 | -1.700 |
| 6307 | SSE | 9346  | 0.0005225292 | 111.00 | 0.486 | -1.700 |
| 6308 | SSG | 11838 | 0.0006618555 | 85.23  | 0.374 | -0.667 |
| 6309 | SSH | 4244  | 0.0002372795 | 116.93 | 0.512 | -1.600 |
| 6310 | SSI | 5457  | 0.0003050976 | 118.23 | 0.518 | 0.967  |
| 6311 | SSL | 16141 | 0.0009024336 | 118.27 | 0.518 | 0.733  |
| 6312 | SSK | 6524  | 0.0003647529 | 119.37 | 0.523 | -1.833 |
| 6313 | SSM | 2638  | 0.0001474890 | 119.27 | 0.523 | 0.100  |
| 6314 | SSF | 5519  | 0.0003085640 | 127.57 | 0.559 | 0.400  |
| 6315 | SSP | 13129 | 0.0007340345 | 104.57 | 0.458 | -1.067 |
| 6316 | SSS | 26267 | 0.0014685721 | 95.40  | 0.418 | -0.800 |
| 6317 | SST | 9969  | 0.0005573608 | 104.10 | 0.456 | -0.767 |
| 6318 | SSW | 1997  | 0.0001116511 | 139.67 | 0.612 | -0.833 |
| 6319 | SSY | 3743  | 0.0002092689 | 129.27 | 0.566 | -0.967 |
| 6320 | SSV | 8937  | 0.0004996623 | 109.93 | 0.482 | 0.867  |
| 6321 | STA | 6457  | 0.0003610070 | 102.30 | 0.448 | 0.100  |
| 6322 | STR | 3417  | 0.0001910424 | 136.97 | 0.600 | -2.000 |
| 6323 | STN | 2340  | 0.0001308280 | 113.87 | 0.499 | -1.667 |
| 6324 | STD | 3439  | 0.0001922724 | 111.40 | 0.488 | -1.667 |
| 6325 | STC | 1934  | 0.0001081288 | 106.73 | 0.468 | 0.333  |
| 6326 | STQ | 3094  | 0.0001729837 | 122.10 | 0.535 | -1.667 |
| 6327 | STE | 5207  | 0.0002911202 | 119.70 | 0.525 | -1.667 |
| 6328 | STG | 5453  | 0.0003048739 | 93.93  | 0.412 | -0.633 |
| 6329 | STH | 1911  | 0.0001068429 | 125.63 | 0.551 | -1.567 |
| 6330 | STI | 3203  | 0.0001790778 | 126.93 | 0.556 | 1.000  |
| 6331 | STL | 7973  | 0.0004457656 | 126.97 | 0.556 | 0.767  |
| 6332 | STK | 3233  | 0.0001807551 | 128.07 | 0.561 | -1.800 |
| 6333 | STM | 1438  | 0.0000803977 | 127.97 | 0.561 | 0.133  |
| 6334 | STF | 2884  | 0.0001612427 | 136.27 | 0.597 | 0.433  |
| 6335 | STP | 6779  | 0.0003790098 | 113.27 | 0.496 | -1.033 |
| 6336 | STS | 8994  | 0.0005028491 | 104.10 | 0.456 | -0.767 |
| 6337 | STT | 5662  | 0.0003165590 | 112.80 | 0.494 | -0.733 |
| 6338 | STW | 961   | 0.0000537289 | 148.37 | 0.650 | -0.800 |

|      |     |      |              |        |       |        |
|------|-----|------|--------------|--------|-------|--------|
| 6339 | STY | 1809 | 0.0001011401 | 137.97 | 0.605 | -0.933 |
| 6340 | STV | 5291 | 0.0002958166 | 118.63 | 0.520 | 0.900  |
| 6341 | SWA | 1517 | 0.0000848146 | 137.87 | 0.604 | 0.033  |
| 6342 | SWR | 1402 | 0.0000783850 | 172.53 | 0.756 | -2.067 |
| 6343 | SWN | 753  | 0.0000420998 | 149.43 | 0.655 | -1.733 |
| 6344 | SWD | 1105 | 0.0000617799 | 146.97 | 0.644 | -1.733 |
| 6345 | SWC | 422  | 0.0000235938 | 142.30 | 0.624 | 0.267  |
| 6346 | SWQ | 881  | 0.0000492562 | 157.67 | 0.691 | -1.733 |
| 6347 | SWE | 1419 | 0.0000793354 | 155.27 | 0.680 | -1.733 |
| 6348 | SWG | 1506 | 0.0000841996 | 129.50 | 0.567 | -0.700 |
| 6349 | SWH | 478  | 0.0000267247 | 161.20 | 0.706 | -1.633 |
| 6350 | SWI | 894  | 0.0000499830 | 162.50 | 0.712 | 0.933  |
| 6351 | SWL | 1876 | 0.0001048860 | 162.53 | 0.712 | 0.700  |
| 6352 | SWK | 1256 | 0.0000702222 | 163.63 | 0.717 | -1.867 |
| 6353 | SWM | 471  | 0.0000263333 | 163.53 | 0.717 | 0.067  |
| 6354 | SWF | 798  | 0.0000446157 | 171.83 | 0.753 | 0.367  |
| 6355 | SWP | 1096 | 0.0000612767 | 148.83 | 0.652 | -1.100 |
| 6356 | SWS | 1746 | 0.0000976178 | 139.67 | 0.612 | -0.833 |
| 6357 | SWT | 1137 | 0.0000635690 | 148.37 | 0.650 | -0.800 |
| 6358 | SWW | 375  | 0.0000209660 | 183.93 | 0.806 | -0.867 |
| 6359 | SWY | 597  | 0.0000333779 | 173.53 | 0.760 | -1.000 |
| 6360 | SWV | 1291 | 0.0000721790 | 154.20 | 0.676 | 0.833  |
| 6361 | SYA | 1796 | 0.0001004133 | 127.47 | 0.559 | -0.100 |
| 6362 | SYR | 2087 | 0.0001166829 | 162.13 | 0.710 | -2.200 |
| 6363 | SYN | 1475 | 0.0000824664 | 139.03 | 0.609 | -1.867 |
| 6364 | SYD | 1610 | 0.0000900141 | 136.57 | 0.598 | -1.867 |
| 6365 | SYC | 830  | 0.0000464048 | 131.90 | 0.578 | 0.133  |
| 6366 | SYQ | 1631 | 0.0000911882 | 147.27 | 0.645 | -1.867 |
| 6367 | SYE | 1874 | 0.0001047742 | 144.87 | 0.635 | -1.867 |
| 6368 | SYG | 2210 | 0.0001235598 | 119.10 | 0.522 | -0.833 |
| 6369 | SYH | 945  | 0.0000528344 | 150.80 | 0.661 | -1.767 |
| 6370 | SYI | 1807 | 0.0001010283 | 152.10 | 0.667 | 0.800  |
| 6371 | SYL | 4042 | 0.0002259858 | 152.13 | 0.667 | 0.567  |
| 6372 | SYK | 1778 | 0.0000994069 | 153.23 | 0.671 | -2.000 |
| 6373 | SYM | 709  | 0.0000396398 | 153.13 | 0.671 | -0.067 |
| 6374 | SYF | 1522 | 0.0000850941 | 161.43 | 0.707 | 0.233  |
| 6375 | SYP | 1940 | 0.0001084642 | 138.43 | 0.607 | -1.233 |
| 6376 | SYS | 3636 | 0.0002032866 | 129.27 | 0.566 | -0.967 |
| 6377 | SYT | 2140 | 0.0001196461 | 137.97 | 0.605 | -0.933 |
| 6378 | SYW | 465  | 0.0000259979 | 173.53 | 0.760 | -1.000 |
| 6379 | SYY | 1195 | 0.0000668117 | 163.13 | 0.715 | -1.133 |
| 6380 | SYV | 2302 | 0.0001287034 | 143.80 | 0.630 | 0.700  |
| 6381 | SVA | 5725 | 0.0003200813 | 108.13 | 0.474 | 1.733  |
| 6382 | SVR | 4215 | 0.0002356581 | 142.80 | 0.626 | -0.367 |
| 6383 | SVN | 2870 | 0.0001604600 | 119.70 | 0.525 | -0.033 |
| 6384 | SVD | 3973 | 0.0002221280 | 117.23 | 0.514 | -0.033 |
| 6385 | SVC | 2075 | 0.0001160120 | 112.57 | 0.493 | 1.967  |
| 6386 | SVQ | 3543 | 0.0001980870 | 127.93 | 0.561 | -0.033 |
| 6387 | SVE | 4873 | 0.0002724465 | 125.53 | 0.550 | -0.033 |
| 6388 | SVG | 5034 | 0.0002814479 | 99.77  | 0.437 | 1.000  |
| 6389 | SVH | 2272 | 0.0001270262 | 131.47 | 0.576 | 0.067  |
| 6390 | SVI | 3847 | 0.0002150835 | 132.77 | 0.582 | 2.633  |

|      |     |      |              |        |       |        |
|------|-----|------|--------------|--------|-------|--------|
| 6391 | SVL | 9180 | 0.0005132483 | 132.80 | 0.582 | 2.400  |
| 6392 | SVK | 4040 | 0.0002258740 | 133.90 | 0.587 | -0.167 |
| 6393 | SVM | 1552 | 0.0000867714 | 133.80 | 0.586 | 1.767  |
| 6394 | SVF | 3210 | 0.0001794692 | 142.10 | 0.623 | 2.067  |
| 6395 | SVP | 6032 | 0.0003372455 | 119.10 | 0.522 | 0.600  |
| 6396 | SVS | 8676 | 0.0004850700 | 109.93 | 0.482 | 0.867  |
| 6397 | SVT | 5603 | 0.0003132604 | 118.63 | 0.520 | 0.900  |
| 6398 | SVW | 967  | 0.0000540644 | 154.20 | 0.676 | 0.833  |
| 6399 | SVY | 2129 | 0.0001190311 | 143.80 | 0.630 | 0.700  |
| 6400 | SVV | 5219 | 0.0002917912 | 124.47 | 0.545 | 2.533  |
| 6401 | TAA | 7020 | 0.0003924840 | 100.50 | 0.440 | 0.967  |
| 6402 | TAR | 3519 | 0.0001967452 | 135.17 | 0.592 | -1.133 |
| 6403 | TAN | 2005 | 0.0001120983 | 112.07 | 0.491 | -0.800 |
| 6404 | TAD | 2661 | 0.0001487749 | 109.60 | 0.480 | -0.800 |
| 6405 | TAC | 1297 | 0.0000725145 | 104.93 | 0.460 | 1.200  |
| 6406 | TAQ | 3005 | 0.0001680077 | 120.30 | 0.527 | -0.800 |
| 6407 | TAE | 4524 | 0.0002529341 | 117.90 | 0.517 | -0.800 |
| 6408 | TAG | 4616 | 0.0002580778 | 92.13  | 0.404 | 0.233  |
| 6409 | TAH | 1460 | 0.0000816277 | 123.83 | 0.543 | -0.700 |
| 6410 | TAI | 2969 | 0.0001659950 | 125.13 | 0.548 | 1.867  |
| 6411 | TAL | 7167 | 0.0004007027 | 125.17 | 0.548 | 1.633  |
| 6412 | TAK | 2972 | 0.0001661627 | 126.27 | 0.553 | -0.933 |
| 6413 | TAM | 1413 | 0.0000790000 | 126.17 | 0.553 | 1.000  |
| 6414 | TAF | 2466 | 0.0001378726 | 134.47 | 0.589 | 1.300  |
| 6415 | TAP | 4343 | 0.0002428145 | 111.47 | 0.488 | -0.167 |
| 6416 | TAS | 6816 | 0.0003810785 | 102.30 | 0.448 | 0.100  |
| 6417 | TAT | 4825 | 0.0002697629 | 111.00 | 0.486 | 0.133  |
| 6418 | TAW | 791  | 0.0000442243 | 146.57 | 0.642 | 0.067  |
| 6419 | TAY | 1468 | 0.0000820750 | 136.17 | 0.597 | -0.067 |
| 6420 | TAV | 4630 | 0.0002588605 | 116.83 | 0.512 | 1.767  |
| 6421 | TRA | 3398 | 0.0001899801 | 135.17 | 0.592 | -1.133 |
| 6422 | TRR | 3259 | 0.0001822087 | 169.83 | 0.744 | -3.233 |
| 6423 | TRN | 1647 | 0.0000920828 | 146.73 | 0.643 | -2.900 |
| 6424 | TRD | 2068 | 0.0001156206 | 144.27 | 0.632 | -2.900 |
| 6425 | TRC | 848  | 0.0000474112 | 139.60 | 0.612 | -0.900 |
| 6426 | TRQ | 1929 | 0.0001078492 | 154.97 | 0.679 | -2.900 |
| 6427 | TRE | 3279 | 0.0001833269 | 152.57 | 0.669 | -2.900 |
| 6428 | TRG | 2919 | 0.0001631995 | 126.80 | 0.556 | -1.867 |
| 6429 | TRH | 1569 | 0.0000877218 | 158.50 | 0.695 | -2.800 |
| 6430 | TRI | 1931 | 0.0001079611 | 159.80 | 0.700 | -0.233 |
| 6431 | TRL | 4337 | 0.0002424791 | 159.83 | 0.700 | -0.467 |
| 6432 | TRK | 2789 | 0.0001559313 | 160.93 | 0.705 | -3.033 |
| 6433 | TRM | 897  | 0.0000501507 | 160.83 | 0.705 | -1.100 |
| 6434 | TRF | 1448 | 0.0000809568 | 169.13 | 0.741 | -0.800 |
| 6435 | TRP | 2877 | 0.0001608513 | 146.13 | 0.640 | -2.267 |
| 6436 | TRS | 3861 | 0.0002158662 | 136.97 | 0.600 | -2.000 |
| 6437 | TRT | 2549 | 0.0001425131 | 145.67 | 0.638 | -1.967 |
| 6438 | TRW | 520  | 0.0000290729 | 181.23 | 0.794 | -2.033 |
| 6439 | TRY | 1133 | 0.0000633454 | 170.83 | 0.749 | -2.167 |
| 6440 | TRV | 2645 | 0.0001478804 | 151.50 | 0.664 | -0.333 |
| 6441 | TNA | 1760 | 0.0000984005 | 112.07 | 0.491 | -0.800 |
| 6442 | TNR | 1500 | 0.0000838641 | 146.73 | 0.643 | -2.900 |

|      |     |      |              |        |       |        |
|------|-----|------|--------------|--------|-------|--------|
| 6443 | TNN | 1128 | 0.0000630658 | 123.63 | 0.542 | -2.567 |
| 6444 | TND | 1103 | 0.0000616681 | 121.17 | 0.531 | -2.567 |
| 6445 | TNC | 688  | 0.0000384657 | 116.50 | 0.511 | -0.567 |
| 6446 | TNQ | 1312 | 0.0000733531 | 131.87 | 0.578 | -2.567 |
| 6447 | TNE | 1835 | 0.0001025937 | 129.47 | 0.567 | -2.567 |
| 6448 | TNG | 1965 | 0.0001098620 | 103.70 | 0.454 | -1.533 |
| 6449 | TNH | 925  | 0.0000517162 | 135.40 | 0.593 | -2.467 |
| 6450 | TNI | 1668 | 0.0000932569 | 136.70 | 0.599 | 0.100  |
| 6451 | TNL | 2930 | 0.0001638145 | 136.73 | 0.599 | -0.133 |
| 6452 | TNK | 1680 | 0.0000939278 | 137.83 | 0.604 | -2.700 |
| 6453 | TNM | 660  | 0.0000369002 | 137.73 | 0.604 | -0.767 |
| 6454 | TNF | 1143 | 0.0000639044 | 146.03 | 0.640 | -0.467 |
| 6455 | TNP | 1679 | 0.0000938719 | 123.03 | 0.539 | -1.933 |
| 6456 | TNS | 2648 | 0.0001480481 | 113.87 | 0.499 | -1.667 |
| 6457 | TNT | 1960 | 0.0001095824 | 122.57 | 0.537 | -1.633 |
| 6458 | TNW | 332  | 0.0000185619 | 158.13 | 0.693 | -1.700 |
| 6459 | TNY | 895  | 0.0000500389 | 147.73 | 0.647 | -1.833 |
| 6460 | TNV | 1849 | 0.0001033765 | 128.40 | 0.563 | 0.000  |
| 6461 | TDA | 2663 | 0.0001488867 | 109.60 | 0.480 | -0.800 |
| 6462 | TDR | 2031 | 0.0001135520 | 144.27 | 0.632 | -2.900 |
| 6463 | TDN | 1506 | 0.0000841996 | 121.17 | 0.531 | -2.567 |
| 6464 | TDD | 2177 | 0.0001217148 | 118.70 | 0.520 | -2.567 |
| 6465 | TDC | 885  | 0.0000494798 | 114.03 | 0.500 | -0.567 |
| 6466 | TDQ | 1472 | 0.0000822986 | 129.40 | 0.567 | -2.567 |
| 6467 | TDE | 2838 | 0.0001586709 | 127.00 | 0.557 | -2.567 |
| 6468 | TDG | 2712 | 0.0001516263 | 101.23 | 0.444 | -1.533 |
| 6469 | TDH | 932  | 0.0000521076 | 132.93 | 0.583 | -2.467 |
| 6470 | TDI | 2145 | 0.0001199257 | 134.23 | 0.588 | 0.100  |
| 6471 | TDL | 4205 | 0.0002350990 | 134.27 | 0.588 | -0.133 |
| 6472 | TDK | 2108 | 0.0001178570 | 135.37 | 0.593 | -2.700 |
| 6473 | TDM | 998  | 0.0000557976 | 135.27 | 0.593 | -0.767 |
| 6474 | TDF | 1773 | 0.0000991274 | 143.57 | 0.629 | -0.467 |
| 6475 | TDP | 2557 | 0.0001429603 | 120.57 | 0.528 | -1.933 |
| 6476 | TDS | 3802 | 0.0002125675 | 111.40 | 0.488 | -1.667 |
| 6477 | TDT | 2551 | 0.0001426249 | 120.10 | 0.526 | -1.633 |
| 6478 | TDW | 570  | 0.0000318684 | 155.67 | 0.682 | -1.700 |
| 6479 | TDY | 1162 | 0.0000649667 | 145.27 | 0.637 | -1.833 |
| 6480 | TDV | 2852 | 0.0001594536 | 125.93 | 0.552 | 0.000  |
| 6481 | TCA | 1293 | 0.0000722909 | 104.93 | 0.460 | 1.200  |
| 6482 | TCR | 1403 | 0.0000784409 | 139.60 | 0.612 | -0.900 |
| 6483 | TCN | 815  | 0.0000455662 | 116.50 | 0.511 | -0.567 |
| 6484 | TCD | 959  | 0.0000536171 | 114.03 | 0.500 | -0.567 |
| 6485 | TCC | 737  | 0.0000412052 | 109.37 | 0.479 | 1.433  |
| 6486 | TCQ | 1231 | 0.0000688245 | 124.73 | 0.547 | -0.567 |
| 6487 | TCE | 1433 | 0.0000801182 | 122.33 | 0.536 | -0.567 |
| 6488 | TCG | 1677 | 0.0000937601 | 96.57  | 0.423 | 0.467  |
| 6489 | TCH | 749  | 0.0000418761 | 128.27 | 0.562 | -0.467 |
| 6490 | TCI | 1051 | 0.0000587608 | 129.57 | 0.568 | 2.100  |
| 6491 | TCL | 2351 | 0.0001314430 | 129.60 | 0.568 | 1.867  |
| 6492 | TCK | 1162 | 0.0000649667 | 130.70 | 0.573 | -0.700 |
| 6493 | TCM | 387  | 0.0000216369 | 130.60 | 0.572 | 1.233  |
| 6494 | TCF | 914  | 0.0000511012 | 138.90 | 0.609 | 1.533  |

|      |     |      |              |        |       |        |
|------|-----|------|--------------|--------|-------|--------|
| 6495 | TCP | 1670 | 0.0000933687 | 115.90 | 0.508 | 0.067  |
| 6496 | TCS | 2425 | 0.0001355803 | 106.73 | 0.468 | 0.333  |
| 6497 | TCT | 1298 | 0.0000725704 | 115.43 | 0.506 | 0.367  |
| 6498 | TCW | 325  | 0.0000181706 | 151.00 | 0.662 | 0.300  |
| 6499 | TCY | 652  | 0.0000364529 | 140.60 | 0.616 | 0.167  |
| 6500 | TCV | 1485 | 0.0000830255 | 121.27 | 0.531 | 2.000  |
| 6501 | TQA | 3235 | 0.0001808669 | 120.30 | 0.527 | -0.800 |
| 6502 | TQR | 2309 | 0.0001290948 | 154.97 | 0.679 | -2.900 |
| 6503 | TQN | 1597 | 0.0000892873 | 131.87 | 0.578 | -2.567 |
| 6504 | TQD | 2021 | 0.0001129929 | 129.40 | 0.567 | -2.567 |
| 6505 | TQC | 807  | 0.0000451189 | 124.73 | 0.547 | -0.567 |
| 6506 | TQQ | 2128 | 0.0001189752 | 140.10 | 0.614 | -2.567 |
| 6507 | TQE | 3307 | 0.0001848924 | 137.70 | 0.603 | -2.567 |
| 6508 | TQG | 2643 | 0.0001477685 | 111.93 | 0.491 | -1.533 |
| 6509 | TQH | 1308 | 0.0000731295 | 143.63 | 0.629 | -2.467 |
| 6510 | TQI | 1737 | 0.0000971146 | 144.93 | 0.635 | 0.100  |
| 6511 | TQL | 3860 | 0.0002158103 | 144.97 | 0.635 | -0.133 |
| 6512 | TQK | 2268 | 0.0001268025 | 146.07 | 0.640 | -2.700 |
| 6513 | TQM | 809  | 0.0000452307 | 145.97 | 0.640 | -0.767 |
| 6514 | TQF | 1176 | 0.0000657495 | 154.27 | 0.676 | -0.467 |
| 6515 | TQP | 2603 | 0.0001455322 | 131.27 | 0.575 | -1.933 |
| 6516 | TQS | 2915 | 0.0001629759 | 122.10 | 0.535 | -1.667 |
| 6517 | TQT | 2467 | 0.0001379285 | 130.80 | 0.573 | -1.633 |
| 6518 | TQW | 432  | 0.0000241529 | 166.37 | 0.729 | -1.700 |
| 6519 | TQY | 864  | 0.0000483057 | 155.97 | 0.683 | -1.833 |
| 6520 | TQV | 2458 | 0.0001374253 | 136.63 | 0.599 | 0.000  |
| 6521 | TEA | 4776 | 0.0002670233 | 117.90 | 0.517 | -0.800 |
| 6522 | TER | 3001 | 0.0001677841 | 152.57 | 0.669 | -2.900 |
| 6523 | TEN | 2607 | 0.0001457558 | 129.47 | 0.567 | -2.567 |
| 6524 | TED | 3760 | 0.0002102193 | 127.00 | 0.557 | -2.567 |
| 6525 | TEC | 1221 | 0.0000682654 | 122.33 | 0.536 | -0.567 |
| 6526 | TEQ | 2367 | 0.0001323375 | 137.70 | 0.603 | -2.567 |
| 6527 | TEE | 6558 | 0.0003666538 | 135.30 | 0.593 | -2.567 |
| 6528 | TEG | 4038 | 0.0002257622 | 109.53 | 0.480 | -1.533 |
| 6529 | TEH | 1447 | 0.0000809009 | 141.23 | 0.619 | -2.467 |
| 6530 | TEI | 2667 | 0.0001491104 | 142.53 | 0.625 | 0.100  |
| 6531 | TEL | 5387 | 0.0003011839 | 142.57 | 0.625 | -0.133 |
| 6532 | TEK | 4207 | 0.0002352108 | 143.67 | 0.630 | -2.700 |
| 6533 | TEM | 1342 | 0.0000750304 | 143.57 | 0.629 | -0.767 |
| 6534 | TEF | 1773 | 0.0000991274 | 151.87 | 0.665 | -0.467 |
| 6535 | TEP | 3137 | 0.0001753878 | 128.87 | 0.565 | -1.933 |
| 6536 | TES | 4077 | 0.0002279426 | 119.70 | 0.525 | -1.667 |
| 6537 | TET | 3453 | 0.0001930552 | 128.40 | 0.563 | -1.633 |
| 6538 | TEW | 609  | 0.0000340488 | 163.97 | 0.719 | -1.700 |
| 6539 | TEY | 1362 | 0.0000761486 | 153.57 | 0.673 | -1.833 |
| 6540 | TEV | 3550 | 0.0001984784 | 134.23 | 0.588 | 0.000  |
| 6541 | TGA | 4355 | 0.0002434854 | 92.13  | 0.404 | 0.233  |
| 6542 | TGR | 3619 | 0.0002023361 | 126.80 | 0.556 | -1.867 |
| 6543 | TGN | 2236 | 0.0001250134 | 103.70 | 0.454 | -1.533 |
| 6544 | TGD | 2992 | 0.0001672809 | 101.23 | 0.444 | -1.533 |
| 6545 | TGC | 1107 | 0.0000618917 | 96.57  | 0.423 | 0.467  |
| 6546 | TGQ | 2846 | 0.0001591181 | 111.93 | 0.491 | -1.533 |

|      |     |      |              |        |       |        |
|------|-----|------|--------------|--------|-------|--------|
| 6547 | TGE | 9007 | 0.0005035760 | 109.53 | 0.480 | -1.533 |
| 6548 | TGG | 4145 | 0.0002317445 | 83.77  | 0.367 | -0.500 |
| 6549 | TGH | 1821 | 0.0001018110 | 115.47 | 0.506 | -1.433 |
| 6550 | TGI | 2651 | 0.0001482158 | 116.77 | 0.512 | 1.133  |
| 6551 | TGL | 5738 | 0.0003208081 | 116.80 | 0.512 | 0.900  |
| 6552 | TGK | 3787 | 0.0002117289 | 117.90 | 0.517 | -1.667 |
| 6553 | TGM | 1134 | 0.0000634013 | 117.80 | 0.516 | 0.267  |
| 6554 | TGF | 2203 | 0.0001231684 | 126.10 | 0.553 | 0.567  |
| 6555 | TGP | 4058 | 0.0002268804 | 103.10 | 0.452 | -0.900 |
| 6556 | TGS | 5989 | 0.0003348414 | 93.93  | 0.412 | -0.633 |
| 6557 | TGT | 4376 | 0.0002446595 | 102.63 | 0.450 | -0.600 |
| 6558 | TGW | 752  | 0.0000420439 | 138.20 | 0.606 | -0.667 |
| 6559 | TGY | 1806 | 0.0001009724 | 127.80 | 0.560 | -0.800 |
| 6560 | TGV | 3544 | 0.0001981429 | 108.47 | 0.475 | 1.033  |
| 6561 | THA | 1212 | 0.0000677622 | 123.83 | 0.543 | -0.700 |
| 6562 | THR | 1354 | 0.0000757013 | 158.50 | 0.695 | -2.800 |
| 6563 | THN | 795  | 0.0000444480 | 135.40 | 0.593 | -2.467 |
| 6564 | THD | 742  | 0.0000414848 | 132.93 | 0.583 | -2.467 |
| 6565 | THC | 593  | 0.0000331543 | 128.27 | 0.562 | -0.467 |
| 6566 | THQ | 1271 | 0.0000710608 | 143.63 | 0.629 | -2.467 |
| 6567 | THE | 1089 | 0.0000608853 | 141.23 | 0.619 | -2.467 |
| 6568 | THG | 1421 | 0.0000794473 | 115.47 | 0.506 | -1.433 |
| 6569 | THH | 790  | 0.0000441684 | 147.17 | 0.645 | -2.367 |
| 6570 | THI | 1255 | 0.0000701663 | 148.47 | 0.651 | 0.200  |
| 6571 | THL | 2810 | 0.0001571054 | 148.50 | 0.651 | -0.033 |
| 6572 | THK | 1246 | 0.0000696631 | 149.60 | 0.656 | -2.600 |
| 6573 | THM | 500  | 0.0000279547 | 149.50 | 0.655 | -0.667 |
| 6574 | THF | 961  | 0.0000537289 | 157.80 | 0.691 | -0.367 |
| 6575 | THP | 1617 | 0.0000904055 | 134.80 | 0.591 | -1.833 |
| 6576 | THS | 2502 | 0.0001398853 | 125.63 | 0.551 | -1.567 |
| 6577 | THT | 2998 | 0.0001676164 | 134.33 | 0.589 | -1.533 |
| 6578 | THW | 292  | 0.0000163255 | 169.90 | 0.745 | -1.600 |
| 6579 | THY | 718  | 0.0000401429 | 159.50 | 0.699 | -1.733 |
| 6580 | THV | 1328 | 0.0000742477 | 140.17 | 0.614 | 0.100  |
| 6581 | TIA | 2463 | 0.0001377048 | 125.13 | 0.548 | 1.867  |
| 6582 | TIR | 2137 | 0.0001194784 | 159.80 | 0.700 | -0.233 |
| 6583 | TIN | 1583 | 0.0000885046 | 136.70 | 0.599 | 0.100  |
| 6584 | TID | 1685 | 0.0000942073 | 134.23 | 0.588 | 0.100  |
| 6585 | TIC | 1018 | 0.0000569158 | 129.57 | 0.568 | 2.100  |
| 6586 | TIQ | 2026 | 0.0001132724 | 144.93 | 0.635 | 0.100  |
| 6587 | TIE | 2451 | 0.0001370339 | 142.53 | 0.625 | 0.100  |
| 6588 | TIG | 2003 | 0.0001119865 | 116.77 | 0.512 | 1.133  |
| 6589 | TIH | 1271 | 0.0000710608 | 148.47 | 0.651 | 0.200  |
| 6590 | TII | 2081 | 0.0001163475 | 149.77 | 0.656 | 2.767  |
| 6591 | TIL | 4003 | 0.0002238053 | 149.80 | 0.656 | 2.533  |
| 6592 | TIK | 2376 | 0.0001328407 | 150.90 | 0.661 | -0.033 |
| 6593 | TIM | 946  | 0.0000528903 | 150.80 | 0.661 | 1.900  |
| 6594 | TIF | 1736 | 0.0000970587 | 159.10 | 0.697 | 2.200  |
| 6595 | TIP | 2578 | 0.0001441344 | 136.10 | 0.596 | 0.733  |
| 6596 | TIS | 3922 | 0.0002192767 | 126.93 | 0.556 | 1.000  |
| 6597 | TIT | 3056 | 0.0001708591 | 135.63 | 0.594 | 1.033  |
| 6598 | TIW | 433  | 0.0000242088 | 171.20 | 0.750 | 0.967  |

|      |     |      |              |        |       |        |
|------|-----|------|--------------|--------|-------|--------|
| 6599 | TIY | 1164 | 0.0000650785 | 160.80 | 0.705 | 0.833  |
| 6600 | TIV | 2126 | 0.0001188634 | 141.47 | 0.620 | 2.667  |
| 6601 | TLA | 6422 | 0.0003590502 | 125.17 | 0.548 | 1.633  |
| 6602 | TLR | 6049 | 0.0003381960 | 159.83 | 0.700 | -0.467 |
| 6603 | TLN | 3423 | 0.0001913779 | 136.73 | 0.599 | -0.133 |
| 6604 | TLD | 3887 | 0.0002173198 | 134.27 | 0.588 | -0.133 |
| 6605 | TLC | 1960 | 0.0001095824 | 129.60 | 0.568 | 1.867  |
| 6606 | TLQ | 5280 | 0.0002952016 | 144.97 | 0.635 | -0.133 |
| 6607 | TLE | 6428 | 0.0003593856 | 142.57 | 0.625 | -0.133 |
| 6608 | TLG | 5546 | 0.0003100735 | 116.80 | 0.512 | 0.900  |
| 6609 | TLH | 2476 | 0.0001384317 | 148.50 | 0.651 | -0.033 |
| 6610 | TLI | 3652 | 0.0002041811 | 149.80 | 0.656 | 2.533  |
| 6611 | TLL | 9457 | 0.0005287352 | 149.83 | 0.657 | 2.300  |
| 6612 | TLK | 5490 | 0.0003069426 | 150.93 | 0.661 | -0.267 |
| 6613 | TLM | 1638 | 0.0000915796 | 150.83 | 0.661 | 1.667  |
| 6614 | TLF | 2867 | 0.0001602923 | 159.13 | 0.697 | 1.967  |
| 6615 | TLP | 6405 | 0.0003580997 | 136.13 | 0.597 | 0.500  |
| 6616 | TLS | 7921 | 0.0004428583 | 126.97 | 0.556 | 0.767  |
| 6617 | TLT | 6334 | 0.0003541301 | 135.67 | 0.595 | 0.800  |
| 6618 | TLW | 1096 | 0.0000612767 | 171.23 | 0.750 | 0.733  |
| 6619 | TLY | 2282 | 0.0001275853 | 160.83 | 0.705 | 0.600  |
| 6620 | TLV | 4985 | 0.0002787084 | 141.50 | 0.620 | 2.433  |
| 6621 | TKA | 3203 | 0.0001790778 | 126.27 | 0.553 | -0.933 |
| 6622 | TKR | 2297 | 0.0001284239 | 160.93 | 0.705 | -3.033 |
| 6623 | TKN | 1896 | 0.0001060042 | 137.83 | 0.604 | -2.700 |
| 6624 | TKD | 2501 | 0.0001398294 | 135.37 | 0.593 | -2.700 |
| 6625 | TKC | 845  | 0.0000472434 | 130.70 | 0.573 | -0.700 |
| 6626 | TKQ | 1899 | 0.0001061720 | 146.07 | 0.640 | -2.700 |
| 6627 | TKE | 4235 | 0.0002367763 | 143.67 | 0.630 | -2.700 |
| 6628 | TKG | 2610 | 0.0001459235 | 117.90 | 0.517 | -1.667 |
| 6629 | TKH | 1310 | 0.0000732413 | 149.60 | 0.656 | -2.600 |
| 6630 | TKI | 1980 | 0.0001107006 | 150.90 | 0.661 | -0.033 |
| 6631 | TKL | 3823 | 0.0002137416 | 150.93 | 0.661 | -0.267 |
| 6632 | TKK | 3426 | 0.0001915456 | 152.03 | 0.666 | -2.833 |
| 6633 | TKM | 1013 | 0.0000566362 | 151.93 | 0.666 | -0.900 |
| 6634 | TKF | 1284 | 0.0000717877 | 160.23 | 0.702 | -0.600 |
| 6635 | TKP | 2738 | 0.0001530799 | 137.23 | 0.601 | -2.067 |
| 6636 | TKS | 3191 | 0.0001784069 | 128.07 | 0.561 | -1.800 |
| 6637 | TKT | 2655 | 0.0001484395 | 136.77 | 0.599 | -1.767 |
| 6638 | TKW | 522  | 0.0000291847 | 172.33 | 0.755 | -1.833 |
| 6639 | TKY | 1196 | 0.0000668676 | 161.93 | 0.710 | -1.967 |
| 6640 | TKV | 2965 | 0.0001657714 | 142.60 | 0.625 | -0.133 |
| 6641 | TMA | 1523 | 0.0000851500 | 126.17 | 0.553 | 1.000  |
| 6642 | TMR | 813  | 0.0000454543 | 160.83 | 0.705 | -1.100 |
| 6643 | TMN | 674  | 0.0000376829 | 137.73 | 0.604 | -0.767 |
| 6644 | TMD | 1019 | 0.0000569717 | 135.27 | 0.593 | -0.767 |
| 6645 | TMC | 365  | 0.0000204069 | 130.60 | 0.572 | 1.233  |
| 6646 | TMQ | 797  | 0.0000445598 | 145.97 | 0.640 | -0.767 |
| 6647 | TME | 1460 | 0.0000816277 | 143.57 | 0.629 | -0.767 |
| 6648 | TMG | 1017 | 0.0000568599 | 117.80 | 0.516 | 0.267  |
| 6649 | TMH | 363  | 0.0000202951 | 149.50 | 0.655 | -0.667 |
| 6650 | TMI | 658  | 0.0000367884 | 150.80 | 0.661 | 1.900  |



|      |     |      |              |        |       |        |
|------|-----|------|--------------|--------|-------|--------|
| 6651 | TML | 1549 | 0.0000866037 | 150.83 | 0.661 | 1.667  |
| 6652 | TMK | 1095 | 0.0000612208 | 151.93 | 0.666 | -0.900 |
| 6653 | TMM | 470  | 0.0000262774 | 151.83 | 0.665 | 1.033  |
| 6654 | TMF | 537  | 0.0000300233 | 160.13 | 0.702 | 1.333  |
| 6655 | TMP | 1050 | 0.0000587049 | 137.13 | 0.601 | -0.133 |
| 6656 | TMS | 1521 | 0.0000850382 | 127.97 | 0.561 | 0.133  |
| 6657 | TMT | 1184 | 0.0000661967 | 136.67 | 0.599 | 0.167  |
| 6658 | TMW | 164  | 0.0000091691 | 172.23 | 0.755 | 0.100  |
| 6659 | TMY | 440  | 0.0000246001 | 161.83 | 0.709 | -0.033 |
| 6660 | TMV | 1149 | 0.0000642399 | 142.50 | 0.624 | 1.800  |
| 6661 | TFA | 1815 | 0.0001014756 | 134.47 | 0.589 | 1.300  |
| 6662 | TFR | 2095 | 0.0001171302 | 169.13 | 0.741 | -0.800 |
| 6663 | TFN | 1497 | 0.0000836964 | 146.03 | 0.640 | -0.467 |
| 6664 | TFD | 1713 | 0.0000957728 | 143.57 | 0.629 | -0.467 |
| 6665 | TFC | 1014 | 0.0000566921 | 138.90 | 0.609 | 1.533  |
| 6666 | TFQ | 1947 | 0.0001088556 | 154.27 | 0.676 | -0.467 |
| 6667 | TFE | 2092 | 0.0001169625 | 151.87 | 0.665 | -0.467 |
| 6668 | TFG | 1998 | 0.0001117070 | 126.10 | 0.553 | 0.567  |
| 6669 | TFH | 1186 | 0.0000663085 | 157.80 | 0.691 | -0.367 |
| 6670 | TFI | 1695 | 0.0000947664 | 159.10 | 0.697 | 2.200  |
| 6671 | TFL | 3897 | 0.0002178789 | 159.13 | 0.697 | 1.967  |
| 6672 | TFK | 1930 | 0.0001079051 | 160.23 | 0.702 | -0.600 |
| 6673 | TFM | 606  | 0.0000338811 | 160.13 | 0.702 | 1.333  |
| 6674 | TFF | 1508 | 0.0000843114 | 168.43 | 0.738 | 1.633  |
| 6675 | TFP | 2331 | 0.0001303248 | 145.43 | 0.637 | 0.167  |
| 6676 | TFS | 3824 | 0.0002137975 | 136.27 | 0.597 | 0.433  |
| 6677 | TFT | 2540 | 0.0001420099 | 144.97 | 0.635 | 0.467  |
| 6678 | TFW | 490  | 0.0000273956 | 180.53 | 0.791 | 0.400  |
| 6679 | TFY | 1115 | 0.0000623390 | 170.13 | 0.746 | 0.267  |
| 6680 | TFV | 1925 | 0.0001076256 | 150.80 | 0.661 | 2.100  |
| 6681 | TPA | 5722 | 0.0003199136 | 111.47 | 0.488 | -0.167 |
| 6682 | TPR | 3561 | 0.0001990934 | 146.13 | 0.640 | -2.267 |
| 6683 | TPN | 1823 | 0.0001019228 | 123.03 | 0.539 | -1.933 |
| 6684 | TPD | 2613 | 0.0001460913 | 120.57 | 0.528 | -1.933 |
| 6685 | TPC | 1066 | 0.0000595994 | 115.90 | 0.508 | 0.067  |
| 6686 | TPQ | 2947 | 0.0001647650 | 131.27 | 0.575 | -1.933 |
| 6687 | TPE | 4997 | 0.0002793793 | 128.87 | 0.565 | -1.933 |
| 6688 | TPG | 5507 | 0.0003078931 | 103.10 | 0.452 | -0.900 |
| 6689 | TPH | 1340 | 0.0000749186 | 134.80 | 0.591 | -1.833 |
| 6690 | TPI | 2099 | 0.0001173538 | 136.10 | 0.596 | 0.733  |
| 6691 | TPL | 6249 | 0.0003493778 | 136.13 | 0.597 | 0.500  |
| 6692 | TPK | 3108 | 0.0001737664 | 137.23 | 0.601 | -2.067 |
| 6693 | TPM | 1238 | 0.0000692158 | 137.13 | 0.601 | -0.133 |
| 6694 | TPF | 1682 | 0.0000940396 | 145.43 | 0.637 | 0.167  |
| 6695 | TPP | 5712 | 0.0003193545 | 122.43 | 0.537 | -1.300 |
| 6696 | TPS | 7025 | 0.0003927635 | 113.27 | 0.496 | -1.033 |
| 6697 | TPT | 4522 | 0.0002528223 | 121.97 | 0.534 | -1.000 |
| 6698 | TPW | 595  | 0.0000332661 | 157.53 | 0.690 | -1.067 |
| 6699 | TPY | 1353 | 0.0000756454 | 147.13 | 0.645 | -1.200 |
| 6700 | TPV | 4214 | 0.0002356022 | 127.80 | 0.560 | 0.633  |
| 6701 | TSA | 5968 | 0.0003336673 | 102.30 | 0.448 | 0.100  |
| 6702 | TSR | 4217 | 0.0002357699 | 136.97 | 0.600 | -2.000 |

|      |     |       |              |        |       |        |
|------|-----|-------|--------------|--------|-------|--------|
| 6703 | TSN | 2565  | 0.0001434076 | 113.87 | 0.499 | -1.667 |
| 6704 | TSD | 3489  | 0.0001950679 | 111.40 | 0.488 | -1.667 |
| 6705 | TSC | 1669  | 0.0000933128 | 106.73 | 0.468 | 0.333  |
| 6706 | TSQ | 3645  | 0.0002037898 | 122.10 | 0.535 | -1.667 |
| 6707 | TSE | 4734  | 0.0002646751 | 119.70 | 0.525 | -1.667 |
| 6708 | TSG | 5622  | 0.0003143226 | 93.93  | 0.412 | -0.633 |
| 6709 | TSH | 2175  | 0.0001216029 | 125.63 | 0.551 | -1.567 |
| 6710 | TSI | 3186  | 0.0001781273 | 126.93 | 0.556 | 1.000  |
| 6711 | TSL | 7923  | 0.0004429702 | 126.97 | 0.556 | 0.767  |
| 6712 | TSK | 3498  | 0.0001955711 | 128.07 | 0.561 | -1.800 |
| 6713 | TSM | 1285  | 0.0000718436 | 127.97 | 0.561 | 0.133  |
| 6714 | TSF | 2865  | 0.0001601804 | 136.27 | 0.597 | 0.433  |
| 6715 | TSP | 6325  | 0.0003536270 | 113.27 | 0.496 | -1.033 |
| 6716 | TSS | 10005 | 0.0005593735 | 104.10 | 0.456 | -0.767 |
| 6717 | TST | 5559  | 0.0003108004 | 112.80 | 0.494 | -0.733 |
| 6718 | TSW | 990   | 0.0000553503 | 148.37 | 0.650 | -0.800 |
| 6719 | TSY | 1779  | 0.0000994628 | 137.97 | 0.605 | -0.933 |
| 6720 | TSV | 5072  | 0.0002835725 | 118.63 | 0.520 | 0.900  |
| 6721 | TTA | 4775  | 0.0002669674 | 111.00 | 0.486 | 0.133  |
| 6722 | TTR | 2443  | 0.0001365867 | 145.67 | 0.638 | -1.967 |
| 6723 | TTN | 1702  | 0.0000951578 | 122.57 | 0.537 | -1.633 |
| 6724 | TTD | 2235  | 0.0001249575 | 120.10 | 0.526 | -1.633 |
| 6725 | TTC | 1295  | 0.0000724027 | 115.43 | 0.506 | 0.367  |
| 6726 | TTQ | 2229  | 0.0001246220 | 130.80 | 0.573 | -1.633 |
| 6727 | TTE | 3338  | 0.0001866256 | 128.40 | 0.563 | -1.633 |
| 6728 | TTG | 3564  | 0.0001992611 | 102.63 | 0.450 | -0.600 |
| 6729 | TTH | 1534  | 0.0000857650 | 134.33 | 0.589 | -1.533 |
| 6730 | TTI | 2550  | 0.0001425690 | 135.63 | 0.594 | 1.033  |
| 6731 | TTL | 5043  | 0.0002819511 | 135.67 | 0.595 | 0.800  |
| 6732 | TTK | 2522  | 0.0001410035 | 136.77 | 0.599 | -1.767 |
| 6733 | TTM | 1062  | 0.0000593758 | 136.67 | 0.599 | 0.167  |
| 6734 | TTF | 1966  | 0.0001099179 | 144.97 | 0.635 | 0.467  |
| 6735 | TTP | 4325  | 0.0002418082 | 121.97 | 0.534 | -1.000 |
| 6736 | TTS | 5626  | 0.0003145463 | 112.80 | 0.494 | -0.733 |
| 6737 | TTT | 6238  | 0.0003487628 | 121.50 | 0.532 | -0.700 |
| 6738 | TTW | 628   | 0.0000351111 | 157.07 | 0.688 | -0.767 |
| 6739 | TTY | 1268  | 0.0000708931 | 146.67 | 0.643 | -0.900 |
| 6740 | TTV | 4434  | 0.0002479023 | 127.33 | 0.558 | 0.933  |
| 6741 | TWA | 925   | 0.0000517162 | 146.57 | 0.642 | 0.067  |
| 6742 | TWR | 831   | 0.0000464607 | 181.23 | 0.794 | -2.033 |
| 6743 | TWN | 606   | 0.0000338811 | 158.13 | 0.693 | -1.700 |
| 6744 | TWD | 654   | 0.0000365647 | 155.67 | 0.682 | -1.700 |
| 6745 | TWC | 205   | 0.0000114614 | 151.00 | 0.662 | 0.300  |
| 6746 | TWQ | 553   | 0.0000309179 | 166.37 | 0.729 | -1.700 |
| 6747 | TWE | 870   | 0.0000486412 | 163.97 | 0.719 | -1.700 |
| 6748 | TWG | 716   | 0.0000400311 | 138.20 | 0.606 | -0.667 |
| 6749 | TWH | 401   | 0.0000224197 | 169.90 | 0.745 | -1.600 |
| 6750 | TWI | 499   | 0.0000278988 | 171.20 | 0.750 | 0.967  |
| 6751 | TWL | 1291  | 0.0000721790 | 171.23 | 0.750 | 0.733  |
| 6752 | TWK | 859   | 0.0000480262 | 172.33 | 0.755 | -1.833 |
| 6753 | TWM | 323   | 0.0000180587 | 172.23 | 0.755 | 0.100  |
| 6754 | TWF | 418   | 0.0000233701 | 180.53 | 0.791 | 0.400  |

|      |     |      |              |        |       |        |
|------|-----|------|--------------|--------|-------|--------|
| 6755 | TWP | 635  | 0.0000355025 | 157.53 | 0.690 | -1.067 |
| 6756 | TWS | 1037 | 0.0000579780 | 148.37 | 0.650 | -0.800 |
| 6757 | TWT | 882  | 0.0000493121 | 157.07 | 0.688 | -0.767 |
| 6758 | TWW | 177  | 0.0000098960 | 192.63 | 0.844 | -0.833 |
| 6759 | TWY | 396  | 0.0000221401 | 182.23 | 0.799 | -0.967 |
| 6760 | TWV | 735  | 0.0000410934 | 162.90 | 0.714 | 0.867  |
| 6761 | TYA | 1280 | 0.0000715640 | 136.17 | 0.597 | -0.067 |
| 6762 | TYR | 1652 | 0.0000923623 | 170.83 | 0.749 | -2.167 |
| 6763 | TYN | 924  | 0.0000516603 | 147.73 | 0.647 | -1.833 |
| 6764 | TYD | 1073 | 0.0000599908 | 145.27 | 0.637 | -1.833 |
| 6765 | TYC | 653  | 0.0000365088 | 140.60 | 0.616 | 0.167  |
| 6766 | TYQ | 1290 | 0.0000721231 | 155.97 | 0.683 | -1.833 |
| 6767 | TYE | 1569 | 0.0000877218 | 153.57 | 0.673 | -1.833 |
| 6768 | TYG | 1564 | 0.0000874423 | 127.80 | 0.560 | -0.800 |
| 6769 | TYH | 768  | 0.0000429384 | 159.50 | 0.699 | -1.733 |
| 6770 | TYI | 1443 | 0.0000806773 | 160.80 | 0.705 | 0.833  |
| 6771 | TYL | 2337 | 0.0001306603 | 160.83 | 0.705 | 0.600  |
| 6772 | TYK | 1253 | 0.0000700545 | 161.93 | 0.710 | -1.967 |
| 6773 | TYM | 606  | 0.0000338811 | 161.83 | 0.709 | -0.033 |
| 6774 | TYF | 941  | 0.0000526107 | 170.13 | 0.746 | 0.267  |
| 6775 | TYP | 1162 | 0.0000649667 | 147.13 | 0.645 | -1.200 |
| 6776 | TYS | 2222 | 0.0001242307 | 137.97 | 0.605 | -0.933 |
| 6777 | TYT | 1577 | 0.0000881691 | 146.67 | 0.643 | -0.900 |
| 6778 | TYW | 251  | 0.0000140333 | 182.23 | 0.799 | -0.967 |
| 6779 | TYY | 777  | 0.0000434416 | 171.83 | 0.753 | -1.100 |
| 6780 | TYV | 1532 | 0.0000856532 | 152.50 | 0.668 | 0.733  |
| 6781 | TVA | 4532 | 0.0002533814 | 116.83 | 0.512 | 1.767  |
| 6782 | TVR | 3366 | 0.0001881910 | 151.50 | 0.664 | -0.333 |
| 6783 | TVN | 2476 | 0.0001384317 | 128.40 | 0.563 | 0.000  |
| 6784 | TVD | 2850 | 0.0001593418 | 125.93 | 0.552 | 0.000  |
| 6785 | TVC | 1579 | 0.0000882809 | 121.27 | 0.531 | 2.000  |
| 6786 | TVQ | 2936 | 0.0001641500 | 136.63 | 0.599 | 0.000  |
| 6787 | TVE | 4233 | 0.0002366645 | 134.23 | 0.588 | 0.000  |
| 6788 | TVG | 3547 | 0.0001983106 | 108.47 | 0.475 | 1.033  |
| 6789 | TVH | 1937 | 0.0001082965 | 140.17 | 0.614 | 0.100  |
| 6790 | TVI | 3199 | 0.0001788542 | 141.47 | 0.620 | 2.667  |
| 6791 | TVL | 6590 | 0.0003684429 | 141.50 | 0.620 | 2.433  |
| 6792 | TVK | 3686 | 0.0002060821 | 142.60 | 0.625 | -0.133 |
| 6793 | TVM | 1342 | 0.0000750304 | 142.50 | 0.624 | 1.800  |
| 6794 | TVF | 2639 | 0.0001475449 | 150.80 | 0.661 | 2.100  |
| 6795 | TVP | 4238 | 0.0002369440 | 127.80 | 0.560 | 0.633  |
| 6796 | TVS | 5954 | 0.0003328846 | 118.63 | 0.520 | 0.900  |
| 6797 | TVT | 5510 | 0.0003080608 | 127.33 | 0.558 | 0.933  |
| 6798 | TVW | 789  | 0.0000441125 | 162.90 | 0.714 | 0.867  |
| 6799 | TVY | 1722 | 0.0000962760 | 152.50 | 0.668 | 0.733  |
| 6800 | TVV | 4204 | 0.0002350431 | 133.17 | 0.584 | 2.567  |
| 6801 | WAA | 1474 | 0.0000824105 | 136.07 | 0.596 | 0.900  |
| 6802 | WAR | 1026 | 0.0000573630 | 170.73 | 0.748 | -1.200 |
| 6803 | WAN | 348  | 0.0000194565 | 147.63 | 0.647 | -0.867 |
| 6804 | WAD | 617  | 0.0000344961 | 145.17 | 0.636 | -0.867 |
| 6805 | WAC | 427  | 0.0000238733 | 140.50 | 0.616 | 1.133  |
| 6806 | WAQ | 742  | 0.0000414848 | 155.87 | 0.683 | -0.867 |

|      |     |      |              |        |       |        |
|------|-----|------|--------------|--------|-------|--------|
| 6807 | WAE | 962  | 0.0000537848 | 153.47 | 0.673 | -0.867 |
| 6808 | WAG | 1099 | 0.0000614444 | 127.70 | 0.560 | 0.167  |
| 6809 | WAH | 366  | 0.0000204628 | 159.40 | 0.699 | -0.767 |
| 6810 | WAI | 545  | 0.0000304706 | 160.70 | 0.704 | 1.800  |
| 6811 | WAL | 1820 | 0.0001017551 | 160.73 | 0.704 | 1.567  |
| 6812 | WAK | 688  | 0.0000384657 | 161.83 | 0.709 | -1.000 |
| 6813 | WAM | 281  | 0.0000157105 | 161.73 | 0.709 | 0.933  |
| 6814 | WAF | 603  | 0.0000337134 | 170.03 | 0.745 | 1.233  |
| 6815 | WAP | 1162 | 0.0000649667 | 147.03 | 0.644 | -0.233 |
| 6816 | WAS | 1320 | 0.0000738004 | 137.87 | 0.604 | 0.033  |
| 6817 | WAT | 827  | 0.0000462371 | 146.57 | 0.642 | 0.067  |
| 6818 | WAW | 309  | 0.0000172760 | 182.13 | 0.798 | 0.000  |
| 6819 | WAY | 273  | 0.0000152633 | 171.73 | 0.753 | -0.133 |
| 6820 | WAV | 996  | 0.0000556858 | 152.40 | 0.668 | 1.700  |
| 6821 | WRA | 894  | 0.0000499830 | 170.73 | 0.748 | -1.200 |
| 6822 | WRR | 1463 | 0.0000817954 | 205.40 | 0.900 | -3.300 |
| 6823 | WRN | 541  | 0.0000302470 | 182.30 | 0.799 | -2.967 |
| 6824 | WRD | 745  | 0.0000416525 | 179.83 | 0.788 | -2.967 |
| 6825 | WRC | 363  | 0.0000202951 | 175.17 | 0.768 | -0.967 |
| 6826 | WRQ | 782  | 0.0000437211 | 190.53 | 0.835 | -2.967 |
| 6827 | WRE | 1030 | 0.0000575867 | 188.13 | 0.824 | -2.967 |
| 6828 | WRG | 1065 | 0.0000595435 | 162.37 | 0.712 | -1.933 |
| 6829 | WRH | 365  | 0.0000204069 | 194.07 | 0.850 | -2.867 |
| 6830 | WRI | 499  | 0.0000278988 | 195.37 | 0.856 | -0.300 |
| 6831 | WRL | 1247 | 0.0000697190 | 195.40 | 0.856 | -0.533 |
| 6832 | WRK | 982  | 0.0000549030 | 196.50 | 0.861 | -3.100 |
| 6833 | WRM | 291  | 0.0000162696 | 196.40 | 0.861 | -1.167 |
| 6834 | WRF | 504  | 0.0000281783 | 204.70 | 0.897 | -0.867 |
| 6835 | WRP | 899  | 0.0000502626 | 181.70 | 0.796 | -2.333 |
| 6836 | WRS | 1097 | 0.0000613326 | 172.53 | 0.756 | -2.067 |
| 6837 | WRT | 687  | 0.0000384098 | 181.23 | 0.794 | -2.033 |
| 6838 | WRW | 252  | 0.0000140892 | 216.80 | 0.950 | -2.100 |
| 6839 | WRY | 335  | 0.0000187296 | 206.40 | 0.904 | -2.233 |
| 6840 | WRV | 715  | 0.0000399752 | 187.07 | 0.820 | -0.400 |
| 6841 | WNA | 490  | 0.0000273956 | 147.63 | 0.647 | -0.867 |
| 6842 | WNR | 577  | 0.0000322597 | 182.30 | 0.799 | -2.967 |
| 6843 | WNN | 366  | 0.0000204628 | 159.20 | 0.698 | -2.633 |
| 6844 | WND | 462  | 0.0000258301 | 156.73 | 0.687 | -2.633 |
| 6845 | WNC | 223  | 0.0000124678 | 152.07 | 0.666 | -0.633 |
| 6846 | WNQ | 488  | 0.0000272838 | 167.43 | 0.734 | -2.633 |
| 6847 | WNE | 633  | 0.0000353907 | 165.03 | 0.723 | -2.633 |
| 6848 | WNG | 649  | 0.0000362852 | 139.27 | 0.610 | -1.600 |
| 6849 | WNH | 235  | 0.0000131387 | 170.97 | 0.749 | -2.533 |
| 6850 | WNI | 460  | 0.0000257183 | 172.27 | 0.755 | 0.033  |
| 6851 | WNL | 953  | 0.0000532817 | 172.30 | 0.755 | -0.200 |
| 6852 | WNK | 601  | 0.0000336016 | 173.40 | 0.760 | -2.767 |
| 6853 | WNM | 226  | 0.0000126355 | 173.30 | 0.759 | -0.833 |
| 6854 | WNF | 370  | 0.0000206865 | 181.60 | 0.796 | -0.533 |
| 6855 | WNP | 615  | 0.0000343843 | 158.60 | 0.695 | -2.000 |
| 6856 | WNS | 906  | 0.0000506539 | 149.43 | 0.655 | -1.733 |
| 6857 | WNT | 532  | 0.0000297438 | 158.13 | 0.693 | -1.700 |
| 6858 | WNW | 191  | 0.0000106787 | 193.70 | 0.849 | -1.767 |

|      |     |      |              |        |       |        |
|------|-----|------|--------------|--------|-------|--------|
| 6859 | WNY | 290  | 0.0000162137 | 183.30 | 0.803 | -1.900 |
| 6860 | WNV | 562  | 0.0000314211 | 163.97 | 0.719 | -0.067 |
| 6861 | WDA | 621  | 0.0000347197 | 145.17 | 0.636 | -0.867 |
| 6862 | WDR | 682  | 0.0000381302 | 179.83 | 0.788 | -2.967 |
| 6863 | WDN | 376  | 0.0000210219 | 156.73 | 0.687 | -2.633 |
| 6864 | WDD | 525  | 0.0000293524 | 154.27 | 0.676 | -2.633 |
| 6865 | WDC | 313  | 0.0000174996 | 149.60 | 0.656 | -0.633 |
| 6866 | WDQ | 550  | 0.0000307502 | 164.97 | 0.723 | -2.633 |
| 6867 | WDE | 699  | 0.0000390807 | 162.57 | 0.712 | -2.633 |
| 6868 | WDG | 698  | 0.0000390248 | 136.80 | 0.599 | -1.600 |
| 6869 | WDH | 315  | 0.0000176115 | 168.50 | 0.738 | -2.533 |
| 6870 | WDI | 481  | 0.0000268924 | 169.80 | 0.744 | 0.033  |
| 6871 | WDL | 1239 | 0.0000692717 | 169.83 | 0.744 | -0.200 |
| 6872 | WDK | 505  | 0.0000282342 | 170.93 | 0.749 | -2.767 |
| 6873 | WDM | 263  | 0.0000147042 | 170.83 | 0.749 | -0.833 |
| 6874 | WDF | 424  | 0.0000237056 | 179.13 | 0.785 | -0.533 |
| 6875 | WDP | 856  | 0.0000478584 | 156.13 | 0.684 | -2.000 |
| 6876 | WDS | 897  | 0.0000501507 | 146.97 | 0.644 | -1.733 |
| 6877 | WDT | 745  | 0.0000416525 | 155.67 | 0.682 | -1.700 |
| 6878 | WDW | 219  | 0.0000122442 | 191.23 | 0.838 | -1.767 |
| 6879 | WDY | 358  | 0.0000200156 | 180.83 | 0.792 | -1.900 |
| 6880 | WDV | 695  | 0.0000388570 | 161.50 | 0.708 | -0.067 |
| 6881 | WCA | 234  | 0.0000130828 | 140.50 | 0.616 | 1.133  |
| 6882 | WCR | 334  | 0.0000186737 | 175.17 | 0.768 | -0.967 |
| 6883 | WCN | 136  | 0.0000076037 | 152.07 | 0.666 | -0.633 |
| 6884 | WCD | 162  | 0.0000090573 | 149.60 | 0.656 | -0.633 |
| 6885 | WCC | 176  | 0.0000098401 | 144.93 | 0.635 | 1.367  |
| 6886 | WCQ | 249  | 0.0000139214 | 160.30 | 0.702 | -0.633 |
| 6887 | WCE | 273  | 0.0000152633 | 157.90 | 0.692 | -0.633 |
| 6888 | WCG | 309  | 0.0000172760 | 132.13 | 0.579 | 0.400  |
| 6889 | WCH | 152  | 0.0000084982 | 163.83 | 0.718 | -0.533 |
| 6890 | WCI | 159  | 0.0000088896 | 165.13 | 0.724 | 2.033  |
| 6891 | WCL | 478  | 0.0000267247 | 165.17 | 0.724 | 1.800  |
| 6892 | WCK | 211  | 0.0000117969 | 166.27 | 0.729 | -0.767 |
| 6893 | WCM | 54   | 0.0000030191 | 166.17 | 0.728 | 1.167  |
| 6894 | WCF | 216  | 0.0000120764 | 174.47 | 0.765 | 1.467  |
| 6895 | WCP | 339  | 0.0000189533 | 151.47 | 0.664 | 0.000  |
| 6896 | WCS | 395  | 0.0000220842 | 142.30 | 0.624 | 0.267  |
| 6897 | WCT | 154  | 0.0000086100 | 151.00 | 0.662 | 0.300  |
| 6898 | WCW | 115  | 0.0000064296 | 186.57 | 0.818 | 0.233  |
| 6899 | WCY | 154  | 0.0000086100 | 176.17 | 0.772 | 0.100  |
| 6900 | WCV | 230  | 0.0000128592 | 156.83 | 0.687 | 1.933  |
| 6901 | WQA | 709  | 0.0000396398 | 155.87 | 0.683 | -0.867 |
| 6902 | WQR | 686  | 0.0000383538 | 190.53 | 0.835 | -2.967 |
| 6903 | WQN | 433  | 0.0000242088 | 167.43 | 0.734 | -2.633 |
| 6904 | WQD | 537  | 0.0000300233 | 164.97 | 0.723 | -2.633 |
| 6905 | WQC | 268  | 0.0000149837 | 160.30 | 0.702 | -0.633 |
| 6906 | WQQ | 620  | 0.0000346638 | 175.67 | 0.770 | -2.633 |
| 6907 | WQE | 737  | 0.0000412052 | 173.27 | 0.759 | -2.633 |
| 6908 | WQG | 679  | 0.0000379625 | 147.50 | 0.646 | -1.600 |
| 6909 | WQH | 320  | 0.0000178910 | 179.20 | 0.785 | -2.533 |
| 6910 | WQI | 309  | 0.0000172760 | 180.50 | 0.791 | 0.033  |

|      |     |      |              |        |       |        |
|------|-----|------|--------------|--------|-------|--------|
| 6911 | WQL | 836  | 0.0000467403 | 180.53 | 0.791 | -0.200 |
| 6912 | WQK | 677  | 0.0000378507 | 181.63 | 0.796 | -2.767 |
| 6913 | WQM | 196  | 0.0000109582 | 181.53 | 0.796 | -0.833 |
| 6914 | WQF | 280  | 0.0000156546 | 189.83 | 0.832 | -0.533 |
| 6915 | WQP | 601  | 0.0000336016 | 166.83 | 0.731 | -2.000 |
| 6916 | WQS | 560  | 0.0000313093 | 157.67 | 0.691 | -1.733 |
| 6917 | WQT | 401  | 0.0000224197 | 166.37 | 0.729 | -1.700 |
| 6918 | WQW | 171  | 0.0000095605 | 201.93 | 0.885 | -1.767 |
| 6919 | WQY | 221  | 0.0000123560 | 191.53 | 0.839 | -1.900 |
| 6920 | WQV | 560  | 0.0000313093 | 172.20 | 0.755 | -0.067 |
| 6921 | WEA | 1092 | 0.0000610531 | 153.47 | 0.673 | -0.867 |
| 6922 | WER | 1035 | 0.0000578662 | 188.13 | 0.824 | -2.967 |
| 6923 | WEN | 610  | 0.0000341047 | 165.03 | 0.723 | -2.633 |
| 6924 | WED | 846  | 0.0000472994 | 162.57 | 0.712 | -2.633 |
| 6925 | WEC | 299  | 0.0000167169 | 157.90 | 0.692 | -0.633 |
| 6926 | WEQ | 812  | 0.0000453984 | 173.27 | 0.759 | -2.633 |
| 6927 | WEE | 1486 | 0.0000830814 | 170.87 | 0.749 | -2.633 |
| 6928 | WEG | 918  | 0.0000513248 | 145.10 | 0.636 | -1.600 |
| 6929 | WEH | 373  | 0.0000208542 | 176.80 | 0.775 | -2.533 |
| 6930 | WEI | 614  | 0.0000343284 | 178.10 | 0.780 | 0.033  |
| 6931 | WEL | 1112 | 0.0000621713 | 178.13 | 0.781 | -0.200 |
| 6932 | WEK | 1182 | 0.0000660849 | 179.23 | 0.785 | -2.767 |
| 6933 | WEM | 337  | 0.0000188415 | 179.13 | 0.785 | -0.833 |
| 6934 | WEF | 343  | 0.0000191769 | 187.43 | 0.821 | -0.533 |
| 6935 | WEP | 980  | 0.0000547912 | 164.43 | 0.721 | -2.000 |
| 6936 | WES | 885  | 0.0000494798 | 155.27 | 0.680 | -1.733 |
| 6937 | WET | 735  | 0.0000410934 | 163.97 | 0.719 | -1.700 |
| 6938 | WEW | 208  | 0.0000116292 | 199.53 | 0.874 | -1.767 |
| 6939 | WEY | 294  | 0.0000164374 | 189.13 | 0.829 | -1.900 |
| 6940 | WEV | 1047 | 0.0000585371 | 169.80 | 0.744 | -0.067 |
| 6941 | WGA | 943  | 0.0000527226 | 127.70 | 0.560 | 0.167  |
| 6942 | WGR | 1101 | 0.0000615562 | 162.37 | 0.712 | -1.933 |
| 6943 | WGN | 472  | 0.0000263892 | 139.27 | 0.610 | -1.600 |
| 6944 | WGD | 615  | 0.0000343843 | 136.80 | 0.599 | -1.600 |
| 6945 | WGC | 350  | 0.0000195683 | 132.13 | 0.579 | 0.400  |
| 6946 | WGQ | 779  | 0.0000435534 | 147.50 | 0.646 | -1.600 |
| 6947 | WGE | 818  | 0.0000457339 | 145.10 | 0.636 | -1.600 |
| 6948 | WGG | 1170 | 0.0000654140 | 119.33 | 0.523 | -0.567 |
| 6949 | WGH | 455  | 0.0000254388 | 151.03 | 0.662 | -1.500 |
| 6950 | WGI | 468  | 0.0000261656 | 152.33 | 0.668 | 1.067  |
| 6951 | WGL | 1544 | 0.0000863241 | 152.37 | 0.668 | 0.833  |
| 6952 | WGK | 715  | 0.0000399752 | 153.47 | 0.673 | -1.733 |
| 6953 | WGM | 191  | 0.0000106787 | 153.37 | 0.672 | 0.200  |
| 6954 | WGF | 442  | 0.0000247120 | 161.67 | 0.708 | 0.500  |
| 6955 | WGP | 1294 | 0.0000723468 | 138.67 | 0.608 | -0.967 |
| 6956 | WGS | 1265 | 0.0000707254 | 129.50 | 0.567 | -0.700 |
| 6957 | WGT | 825  | 0.0000461253 | 138.20 | 0.606 | -0.667 |
| 6958 | WGW | 311  | 0.0000173878 | 173.77 | 0.761 | -0.733 |
| 6959 | WGY | 356  | 0.0000199037 | 163.37 | 0.716 | -0.867 |
| 6960 | WGV | 686  | 0.0000383538 | 144.03 | 0.631 | 0.967  |
| 6961 | WHA | 245  | 0.0000136978 | 159.40 | 0.699 | -0.767 |
| 6962 | WHR | 437  | 0.0000244324 | 194.07 | 0.850 | -2.867 |

|      |     |      |              |        |       |        |
|------|-----|------|--------------|--------|-------|--------|
| 6963 | WHN | 135  | 0.0000075478 | 170.97 | 0.749 | -2.533 |
| 6964 | WHD | 223  | 0.0000124678 | 168.50 | 0.738 | -2.533 |
| 6965 | WHC | 207  | 0.0000115732 | 163.83 | 0.718 | -0.533 |
| 6966 | WHQ | 295  | 0.0000164933 | 179.20 | 0.785 | -2.533 |
| 6967 | WHE | 288  | 0.0000161019 | 176.80 | 0.775 | -2.533 |
| 6968 | WHG | 331  | 0.0000185060 | 151.03 | 0.662 | -1.500 |
| 6969 | WHH | 228  | 0.0000127473 | 182.73 | 0.801 | -2.433 |
| 6970 | WHI | 224  | 0.0000125237 | 184.03 | 0.806 | 0.133  |
| 6971 | WHL | 607  | 0.0000339370 | 184.07 | 0.807 | -0.100 |
| 6972 | WHK | 352  | 0.0000196801 | 185.17 | 0.811 | -2.667 |
| 6973 | WHM | 97   | 0.0000054232 | 185.07 | 0.811 | -0.733 |
| 6974 | WHF | 185  | 0.0000103432 | 193.37 | 0.847 | -0.433 |
| 6975 | WHP | 442  | 0.0000247120 | 170.37 | 0.747 | -1.900 |
| 6976 | WHS | 500  | 0.0000279547 | 161.20 | 0.706 | -1.633 |
| 6977 | WHT | 280  | 0.0000156546 | 169.90 | 0.745 | -1.600 |
| 6978 | WHW | 76   | 0.0000042491 | 205.47 | 0.900 | -1.667 |
| 6979 | WHY | 151  | 0.0000084423 | 195.07 | 0.855 | -1.800 |
| 6980 | WHV | 253  | 0.0000141451 | 175.73 | 0.770 | 0.033  |
| 6981 | WIA | 459  | 0.0000256624 | 160.70 | 0.704 | 1.800  |
| 6982 | WIR | 574  | 0.0000320920 | 195.37 | 0.856 | -0.300 |
| 6983 | WIN | 458  | 0.0000256065 | 172.27 | 0.755 | 0.033  |
| 6984 | WID | 413  | 0.0000230906 | 169.80 | 0.744 | 0.033  |
| 6985 | WIC | 279  | 0.0000155987 | 165.13 | 0.724 | 2.033  |
| 6986 | WIQ | 521  | 0.0000291288 | 180.50 | 0.791 | 0.033  |
| 6987 | WIE | 619  | 0.0000346079 | 178.10 | 0.780 | 0.033  |
| 6988 | WIG | 590  | 0.0000329865 | 152.33 | 0.668 | 1.067  |
| 6989 | WIH | 323  | 0.0000180587 | 184.03 | 0.806 | 0.133  |
| 6990 | WII | 465  | 0.0000259979 | 185.33 | 0.812 | 2.700  |
| 6991 | WIL | 1009 | 0.0000564126 | 185.37 | 0.812 | 2.467  |
| 6992 | WIK | 589  | 0.0000329306 | 186.47 | 0.817 | -0.100 |
| 6993 | WIM | 159  | 0.0000088896 | 186.37 | 0.817 | 1.833  |
| 6994 | WIF | 339  | 0.0000189533 | 194.67 | 0.853 | 2.133  |
| 6995 | WIP | 542  | 0.0000303029 | 171.67 | 0.752 | 0.667  |
| 6996 | WIS | 711  | 0.0000397516 | 162.50 | 0.712 | 0.933  |
| 6997 | WIT | 513  | 0.0000286815 | 171.20 | 0.750 | 0.967  |
| 6998 | WIW | 129  | 0.0000072123 | 206.77 | 0.906 | 0.900  |
| 6999 | WIY | 313  | 0.0000174996 | 196.37 | 0.861 | 0.767  |
| 7000 | WIV | 479  | 0.0000267806 | 177.03 | 0.776 | 2.600  |
| 7001 | WLA | 1409 | 0.0000787763 | 160.73 | 0.704 | 1.567  |
| 7002 | WLR | 1595 | 0.0000891755 | 195.40 | 0.856 | -0.533 |
| 7003 | WLN | 800  | 0.0000447275 | 172.30 | 0.755 | -0.200 |
| 7004 | WLD | 1050 | 0.0000587049 | 169.83 | 0.744 | -0.200 |
| 7005 | WLC | 626  | 0.0000349993 | 165.17 | 0.724 | 1.800  |
| 7006 | WLQ | 1374 | 0.0000768195 | 180.53 | 0.791 | -0.200 |
| 7007 | WLE | 1400 | 0.0000782732 | 178.13 | 0.781 | -0.200 |
| 7008 | WLG | 1441 | 0.0000805654 | 152.37 | 0.668 | 0.833  |
| 7009 | WLH | 629  | 0.0000351670 | 184.07 | 0.807 | -0.100 |
| 7010 | WLI | 732  | 0.0000409257 | 185.37 | 0.812 | 2.467  |
| 7011 | WLL | 2483 | 0.0001388230 | 185.40 | 0.812 | 2.233  |
| 7012 | WLK | 1356 | 0.0000758131 | 186.50 | 0.817 | -0.333 |
| 7013 | WLM | 349  | 0.0000195124 | 186.40 | 0.817 | 1.600  |
| 7014 | WLF | 726  | 0.0000405902 | 194.70 | 0.853 | 1.900  |

|      |     |      |              |        |       |        |
|------|-----|------|--------------|--------|-------|--------|
| 7015 | WLP | 1439 | 0.0000804536 | 171.70 | 0.752 | 0.433  |
| 7016 | WLS | 1859 | 0.0001039356 | 162.53 | 0.712 | 0.700  |
| 7017 | WLT | 1076 | 0.0000601585 | 171.23 | 0.750 | 0.733  |
| 7018 | WLW | 425  | 0.0000237615 | 206.80 | 0.906 | 0.667  |
| 7019 | WLY | 585  | 0.0000327070 | 196.40 | 0.861 | 0.533  |
| 7020 | WLV | 1189 | 0.0000664763 | 177.07 | 0.776 | 2.367  |
| 7021 | WKA | 969  | 0.0000541762 | 161.83 | 0.709 | -1.000 |
| 7022 | WKR | 1079 | 0.0000603262 | 196.50 | 0.861 | -3.100 |
| 7023 | WKN | 630  | 0.0000352229 | 173.40 | 0.760 | -2.767 |
| 7024 | WKD | 755  | 0.0000422116 | 170.93 | 0.749 | -2.767 |
| 7025 | WKC | 334  | 0.0000186737 | 166.27 | 0.729 | -0.767 |
| 7026 | WQO | 692  | 0.0000386893 | 181.63 | 0.796 | -2.767 |
| 7027 | WKE | 1182 | 0.0000660849 | 179.23 | 0.785 | -2.767 |
| 7028 | WKG | 903  | 0.0000504862 | 153.47 | 0.673 | -1.733 |
| 7029 | WKH | 387  | 0.0000216369 | 185.17 | 0.811 | -2.667 |
| 7030 | WKI | 509  | 0.0000284579 | 186.47 | 0.817 | -0.100 |
| 7031 | WKL | 1244 | 0.0000695513 | 186.50 | 0.817 | -0.333 |
| 7032 | WKK | 1271 | 0.0000710608 | 187.60 | 0.822 | -2.900 |
| 7033 | WKM | 306  | 0.0000171083 | 187.50 | 0.822 | -0.967 |
| 7034 | WKF | 475  | 0.0000265570 | 195.80 | 0.858 | -0.667 |
| 7035 | WKP | 851  | 0.0000475789 | 172.80 | 0.757 | -2.133 |
| 7036 | WKS | 970  | 0.0000542321 | 163.63 | 0.717 | -1.867 |
| 7037 | WKT | 777  | 0.0000434416 | 172.33 | 0.755 | -1.833 |
| 7038 | WKW | 227  | 0.0000126914 | 207.90 | 0.911 | -1.900 |
| 7039 | WKY | 321  | 0.0000179469 | 197.50 | 0.865 | -2.033 |
| 7040 | WKV | 779  | 0.0000435534 | 178.17 | 0.781 | -0.200 |
| 7041 | WMA | 500  | 0.0000279547 | 161.73 | 0.709 | 0.933  |
| 7042 | WMR | 300  | 0.0000167728 | 196.40 | 0.861 | -1.167 |
| 7043 | WMN | 249  | 0.0000139214 | 173.30 | 0.759 | -0.833 |
| 7044 | WMD | 317  | 0.0000177233 | 170.83 | 0.749 | -0.833 |
| 7045 | WMC | 101  | 0.0000056468 | 166.17 | 0.728 | 1.167  |
| 7046 | WMQ | 228  | 0.0000127473 | 181.53 | 0.796 | -0.833 |
| 7047 | WME | 342  | 0.0000191210 | 179.13 | 0.785 | -0.833 |
| 7048 | WMG | 340  | 0.0000190092 | 153.37 | 0.672 | 0.200  |
| 7049 | WMH | 110  | 0.0000061500 | 185.07 | 0.811 | -0.733 |
| 7050 | WMI | 212  | 0.0000118528 | 186.37 | 0.817 | 1.833  |
| 7051 | WML | 482  | 0.0000269483 | 186.40 | 0.817 | 1.600  |
| 7052 | WMK | 375  | 0.0000209660 | 187.50 | 0.822 | -0.967 |
| 7053 | WMM | 134  | 0.0000074919 | 187.40 | 0.821 | 0.967  |
| 7054 | WMF | 185  | 0.0000103432 | 195.70 | 0.858 | 1.267  |
| 7055 | WMP | 247  | 0.0000138096 | 172.70 | 0.757 | -0.200 |
| 7056 | WMS | 312  | 0.0000174437 | 163.53 | 0.717 | 0.067  |
| 7057 | WMT | 238  | 0.0000133064 | 172.23 | 0.755 | 0.100  |
| 7058 | WMW | 81   | 0.0000045287 | 207.80 | 0.911 | 0.033  |
| 7059 | WMY | 101  | 0.0000056468 | 197.40 | 0.865 | -0.100 |
| 7060 | WMV | 361  | 0.0000201833 | 178.07 | 0.780 | 1.733  |
| 7061 | WFA | 382  | 0.0000213574 | 170.03 | 0.745 | 1.233  |
| 7062 | WFR | 506  | 0.0000282902 | 204.70 | 0.897 | -0.867 |
| 7063 | WFN | 226  | 0.0000126355 | 181.60 | 0.796 | -0.533 |
| 7064 | WFD | 312  | 0.0000174437 | 179.13 | 0.785 | -0.533 |
| 7065 | WFC | 237  | 0.0000132505 | 174.47 | 0.765 | 1.467  |
| 7066 | WFQ | 570  | 0.0000318684 | 189.83 | 0.832 | -0.533 |



|      |     |      |              |        |       |        |
|------|-----|------|--------------|--------|-------|--------|
| 7067 | WFE | 365  | 0.0000204069 | 187.43 | 0.821 | -0.533 |
| 7068 | WFG | 488  | 0.0000272838 | 161.67 | 0.708 | 0.500  |
| 7069 | WFH | 316  | 0.0000176674 | 193.37 | 0.847 | -0.433 |
| 7070 | WFI | 338  | 0.0000188974 | 194.67 | 0.853 | 2.133  |
| 7071 | WFL | 808  | 0.0000451748 | 194.70 | 0.853 | 1.900  |
| 7072 | WFK | 495  | 0.0000276752 | 195.80 | 0.858 | -0.667 |
| 7073 | WFM | 108  | 0.0000060382 | 195.70 | 0.858 | 1.267  |
| 7074 | WFF | 318  | 0.0000177792 | 204.00 | 0.894 | 1.567  |
| 7075 | WFP | 499  | 0.0000278988 | 181.00 | 0.793 | 0.100  |
| 7076 | WFS | 622  | 0.0000347756 | 171.83 | 0.753 | 0.367  |
| 7077 | WFT | 409  | 0.0000228669 | 180.53 | 0.791 | 0.400  |
| 7078 | WFW | 242  | 0.0000135301 | 216.10 | 0.947 | 0.333  |
| 7079 | WFY | 197  | 0.0000110142 | 205.70 | 0.901 | 0.200  |
| 7080 | WVW | 448  | 0.0000250474 | 186.37 | 0.817 | 2.033  |
| 7081 | WPA | 773  | 0.0000432180 | 147.03 | 0.644 | -0.233 |
| 7082 | WPR | 723  | 0.0000404225 | 181.70 | 0.796 | -2.333 |
| 7083 | WPN | 338  | 0.0000188974 | 158.60 | 0.695 | -2.000 |
| 7084 | WPD | 504  | 0.0000281783 | 156.13 | 0.684 | -2.000 |
| 7085 | WPC | 305  | 0.0000170524 | 151.47 | 0.664 | 0.000  |
| 7086 | WPQ | 518  | 0.0000289611 | 166.83 | 0.731 | -2.000 |
| 7087 | WPE | 783  | 0.0000437771 | 164.43 | 0.721 | -2.000 |
| 7088 | WPG | 972  | 0.0000543439 | 138.67 | 0.608 | -0.967 |
| 7089 | WPH | 294  | 0.0000164374 | 170.37 | 0.747 | -1.900 |
| 7090 | WPI | 240  | 0.0000134183 | 171.67 | 0.752 | 0.667  |
| 7091 | WPL | 1102 | 0.0000616122 | 171.70 | 0.752 | 0.433  |
| 7092 | WPK | 378  | 0.0000211338 | 172.80 | 0.757 | -2.133 |
| 7093 | WPM | 167  | 0.0000093369 | 172.70 | 0.757 | -0.200 |
| 7094 | WPF | 461  | 0.0000257742 | 181.00 | 0.793 | 0.100  |
| 7095 | WPP | 889  | 0.0000497035 | 158.00 | 0.692 | -1.367 |
| 7096 | WPS | 977  | 0.0000546235 | 148.83 | 0.652 | -1.100 |
| 7097 | WPT | 515  | 0.0000287933 | 157.53 | 0.690 | -1.067 |
| 7098 | WPW | 338  | 0.0000188974 | 193.10 | 0.846 | -1.133 |
| 7099 | WPY | 176  | 0.0000098401 | 182.70 | 0.801 | -1.267 |
| 7100 | WPV | 524  | 0.0000292965 | 163.37 | 0.716 | 0.567  |
| 7101 | WSA | 1028 | 0.0000574749 | 137.87 | 0.604 | 0.033  |
| 7102 | WSR | 1031 | 0.0000576426 | 172.53 | 0.756 | -2.067 |
| 7103 | WSN | 426  | 0.0000238174 | 149.43 | 0.655 | -1.733 |
| 7104 | WSD | 782  | 0.0000437211 | 146.97 | 0.644 | -1.733 |
| 7105 | WSC | 505  | 0.0000282342 | 142.30 | 0.624 | 0.267  |
| 7106 | WSQ | 822  | 0.0000459575 | 157.67 | 0.691 | -1.733 |
| 7107 | WSE | 961  | 0.0000537289 | 155.27 | 0.680 | -1.733 |
| 7108 | WSG | 1020 | 0.0000570276 | 129.50 | 0.567 | -0.700 |
| 7109 | WSH | 437  | 0.0000244324 | 161.20 | 0.706 | -1.633 |
| 7110 | WSI | 578  | 0.0000323156 | 162.50 | 0.712 | 0.933  |
| 7111 | WSL | 1704 | 0.0000952696 | 162.53 | 0.712 | 0.700  |
| 7112 | WSK | 856  | 0.0000478584 | 163.63 | 0.717 | -1.867 |
| 7113 | WSM | 259  | 0.0000144805 | 163.53 | 0.717 | 0.067  |
| 7114 | WSF | 675  | 0.0000377388 | 171.83 | 0.753 | 0.367  |
| 7115 | WSP | 1317 | 0.0000736327 | 148.83 | 0.652 | -1.100 |
| 7116 | WSS | 1674 | 0.0000935923 | 139.67 | 0.612 | -0.833 |
| 7117 | WST | 691  | 0.0000386334 | 148.37 | 0.650 | -0.800 |
| 7118 | WSW | 286  | 0.0000159901 | 183.93 | 0.806 | -0.867 |

|      |     |      |              |        |       |        |
|------|-----|------|--------------|--------|-------|--------|
| 7119 | WSY | 386  | 0.0000215810 | 173.53 | 0.760 | -1.000 |
| 7120 | WSV | 875  | 0.0000489207 | 154.20 | 0.676 | 0.833  |
| 7121 | WTA | 880  | 0.0000492003 | 146.57 | 0.642 | 0.067  |
| 7122 | WTR | 702  | 0.0000392484 | 181.23 | 0.794 | -2.033 |
| 7123 | WTN | 357  | 0.0000199597 | 158.13 | 0.693 | -1.700 |
| 7124 | WTD | 594  | 0.0000332102 | 155.67 | 0.682 | -1.700 |
| 7125 | WTC | 281  | 0.0000157105 | 151.00 | 0.662 | 0.300  |
| 7126 | WTQ | 485  | 0.0000271161 | 166.37 | 0.729 | -1.700 |
| 7127 | WTE | 802  | 0.0000448393 | 163.97 | 0.719 | -1.700 |
| 7128 | WTG | 757  | 0.0000423234 | 138.20 | 0.606 | -0.667 |
| 7129 | WTH | 307  | 0.0000171642 | 169.90 | 0.745 | -1.600 |
| 7130 | WTI | 478  | 0.0000267247 | 171.20 | 0.750 | 0.967  |
| 7131 | WTL | 1186 | 0.0000663085 | 171.23 | 0.750 | 0.733  |
| 7132 | WTK | 749  | 0.0000418761 | 172.33 | 0.755 | -1.833 |
| 7133 | WTM | 226  | 0.0000126355 | 172.23 | 0.755 | 0.100  |
| 7134 | WTF | 465  | 0.0000259979 | 180.53 | 0.791 | 0.400  |
| 7135 | WTP | 1019 | 0.0000569717 | 157.53 | 0.690 | -1.067 |
| 7136 | WTS | 958  | 0.0000535612 | 148.37 | 0.650 | -0.800 |
| 7137 | WTT | 591  | 0.0000330425 | 157.07 | 0.688 | -0.767 |
| 7138 | WTW | 186  | 0.0000103991 | 192.63 | 0.844 | -0.833 |
| 7139 | WTY | 366  | 0.0000204628 | 182.23 | 0.799 | -0.967 |
| 7140 | WTV | 777  | 0.0000434416 | 162.90 | 0.714 | 0.867  |
| 7141 | WWA | 293  | 0.0000163815 | 182.13 | 0.798 | 0.000  |
| 7142 | WWR | 223  | 0.0000124678 | 216.80 | 0.950 | -2.100 |
| 7143 | WWN | 123  | 0.0000068769 | 193.70 | 0.849 | -1.767 |
| 7144 | WWD | 146  | 0.0000081628 | 191.23 | 0.838 | -1.767 |
| 7145 | WWC | 69   | 0.0000038577 | 186.57 | 0.818 | 0.233  |
| 7146 | WWQ | 170  | 0.0000095046 | 201.93 | 0.885 | -1.767 |
| 7147 | WWE | 269  | 0.0000150396 | 199.53 | 0.874 | -1.767 |
| 7148 | WWG | 302  | 0.0000168846 | 173.77 | 0.761 | -0.733 |
| 7149 | WWH | 87   | 0.0000048641 | 205.47 | 0.900 | -1.667 |
| 7150 | WWI | 157  | 0.0000087778 | 206.77 | 0.906 | 0.900  |
| 7151 | WWL | 334  | 0.0000186737 | 206.80 | 0.906 | 0.667  |
| 7152 | WWK | 212  | 0.0000118528 | 207.90 | 0.911 | -1.900 |
| 7153 | WWM | 76   | 0.0000042491 | 207.80 | 0.911 | 0.033  |
| 7154 | WWF | 153  | 0.0000085541 | 216.10 | 0.947 | 0.333  |
| 7155 | WWP | 240  | 0.0000134183 | 193.10 | 0.846 | -1.133 |
| 7156 | WWS | 247  | 0.0000138096 | 183.93 | 0.806 | -0.867 |
| 7157 | WWT | 175  | 0.0000097841 | 192.63 | 0.844 | -0.833 |
| 7158 | WWW | 89   | 0.0000049759 | 228.20 | 1.000 | -0.900 |
| 7159 | WWY | 139  | 0.0000077714 | 217.80 | 0.954 | -1.033 |
| 7160 | WWV | 177  | 0.0000098960 | 198.47 | 0.870 | 0.800  |
| 7161 | WYA | 255  | 0.0000142569 | 171.73 | 0.753 | -0.133 |
| 7162 | WYR | 524  | 0.0000292965 | 206.40 | 0.904 | -2.233 |
| 7163 | WYN | 269  | 0.0000150396 | 183.30 | 0.803 | -1.900 |
| 7164 | WYD | 236  | 0.0000131946 | 180.83 | 0.792 | -1.900 |
| 7165 | WYC | 134  | 0.0000074919 | 176.17 | 0.772 | 0.100  |
| 7166 | WYQ | 366  | 0.0000204628 | 191.53 | 0.839 | -1.900 |
| 7167 | WYE | 275  | 0.0000153751 | 189.13 | 0.829 | -1.900 |
| 7168 | WYG | 261  | 0.0000145924 | 163.37 | 0.716 | -0.867 |
| 7169 | WYH | 224  | 0.0000125237 | 195.07 | 0.855 | -1.800 |
| 7170 | WYI | 224  | 0.0000125237 | 196.37 | 0.861 | 0.767  |

|      |     |      |              |        |       |        |
|------|-----|------|--------------|--------|-------|--------|
| 7171 | WYL | 615  | 0.0000343843 | 196.40 | 0.861 | 0.533  |
| 7172 | WYK | 549  | 0.0000306943 | 197.50 | 0.865 | -2.033 |
| 7173 | WYM | 136  | 0.0000076037 | 197.40 | 0.865 | -0.100 |
| 7174 | WYF | 297  | 0.0000166051 | 205.70 | 0.901 | 0.200  |
| 7175 | WYP | 261  | 0.0000145924 | 182.70 | 0.801 | -1.267 |
| 7176 | WYS | 390  | 0.0000218047 | 173.53 | 0.760 | -1.000 |
| 7177 | WYT | 297  | 0.0000166051 | 182.23 | 0.799 | -0.967 |
| 7178 | WYW | 125  | 0.0000069887 | 217.80 | 0.954 | -1.033 |
| 7179 | WYY | 185  | 0.0000103432 | 207.40 | 0.909 | -1.167 |
| 7180 | WYV | 275  | 0.0000153751 | 188.07 | 0.824 | 0.667  |
| 7181 | WVA | 817  | 0.0000456780 | 152.40 | 0.668 | 1.700  |
| 7182 | WVR | 886  | 0.0000495357 | 187.07 | 0.820 | -0.400 |
| 7183 | WVN | 519  | 0.0000290170 | 163.97 | 0.719 | -0.067 |
| 7184 | WVD | 679  | 0.0000379625 | 161.50 | 0.708 | -0.067 |
| 7185 | WVC | 318  | 0.0000177792 | 156.83 | 0.687 | 1.933  |
| 7186 | WVQ | 636  | 0.0000355584 | 172.20 | 0.755 | -0.067 |
| 7187 | WVE | 758  | 0.0000423793 | 169.80 | 0.744 | -0.067 |
| 7188 | WVG | 825  | 0.0000461253 | 144.03 | 0.631 | 0.967  |
| 7189 | WVH | 307  | 0.0000171642 | 175.73 | 0.770 | 0.033  |
| 7190 | WVI | 556  | 0.0000310856 | 177.03 | 0.776 | 2.600  |
| 7191 | WVL | 1403 | 0.0000784409 | 177.07 | 0.776 | 2.367  |
| 7192 | WVK | 707  | 0.0000395279 | 178.17 | 0.781 | -0.200 |
| 7193 | WVM | 227  | 0.0000126914 | 178.07 | 0.780 | 1.733  |
| 7194 | WVF | 432  | 0.0000241529 | 186.37 | 0.817 | 2.033  |
| 7195 | WVP | 910  | 0.0000508776 | 163.37 | 0.716 | 0.567  |
| 7196 | WVS | 1078 | 0.0000602703 | 154.20 | 0.676 | 0.833  |
| 7197 | WVT | 859  | 0.0000480262 | 162.90 | 0.714 | 0.867  |
| 7198 | WVW | 194  | 0.0000108464 | 198.47 | 0.870 | 0.800  |
| 7199 | WVY | 318  | 0.0000177792 | 188.07 | 0.824 | 0.667  |
| 7200 | WVV | 703  | 0.0000393043 | 168.73 | 0.739 | 2.500  |
| 7201 | YAA | 2059 | 0.0001151175 | 125.67 | 0.551 | 0.767  |
| 7202 | YAR | 1263 | 0.0000706136 | 160.33 | 0.703 | -1.333 |
| 7203 | YAN | 835  | 0.0000466843 | 137.23 | 0.601 | -1.000 |
| 7204 | YAD | 1177 | 0.0000658054 | 134.77 | 0.591 | -1.000 |
| 7205 | YAC | 750  | 0.0000419320 | 130.10 | 0.570 | 1.000  |
| 7206 | YAQ | 961  | 0.0000537289 | 145.47 | 0.637 | -1.000 |
| 7207 | YAE | 1411 | 0.0000788882 | 143.07 | 0.627 | -1.000 |
| 7208 | YAG | 1533 | 0.0000857091 | 117.30 | 0.514 | 0.033  |
| 7209 | YAH | 540  | 0.0000301911 | 149.00 | 0.653 | -0.900 |
| 7210 | YAI | 1111 | 0.0000621153 | 150.30 | 0.659 | 1.667  |
| 7211 | YAL | 2244 | 0.0001254607 | 150.33 | 0.659 | 1.433  |
| 7212 | YAK | 1233 | 0.0000689363 | 151.43 | 0.664 | -1.133 |
| 7213 | YAM | 561  | 0.0000313652 | 151.33 | 0.663 | 0.800  |
| 7214 | YAF | 1034 | 0.0000578103 | 159.63 | 0.700 | 1.100  |
| 7215 | YAP | 1120 | 0.0000626185 | 136.63 | 0.599 | -0.367 |
| 7216 | YAS | 1727 | 0.0000965555 | 127.47 | 0.559 | -0.100 |
| 7217 | YAT | 1308 | 0.0000731295 | 136.17 | 0.597 | -0.067 |
| 7218 | YAW | 335  | 0.0000187296 | 171.73 | 0.753 | -0.133 |
| 7219 | YAY | 666  | 0.0000372357 | 161.33 | 0.707 | -0.267 |
| 7220 | YAV | 1737 | 0.0000971146 | 142.00 | 0.622 | 1.567  |
| 7221 | YRA | 1737 | 0.0000971146 | 160.33 | 0.703 | -1.333 |
| 7222 | YRR | 1833 | 0.0001024819 | 195.00 | 0.855 | -3.433 |

|      |     |      |              |        |       |        |
|------|-----|------|--------------|--------|-------|--------|
| 7223 | YRN | 1261 | 0.0000705018 | 171.90 | 0.753 | -3.100 |
| 7224 | YRD | 1823 | 0.0001019228 | 169.43 | 0.742 | -3.100 |
| 7225 | YRC | 1246 | 0.0000696631 | 164.77 | 0.722 | -1.100 |
| 7226 | YRQ | 1390 | 0.0000777141 | 180.13 | 0.789 | -3.100 |
| 7227 | YRE | 1761 | 0.0000984565 | 177.73 | 0.779 | -3.100 |
| 7228 | YRG | 1765 | 0.0000986801 | 151.97 | 0.666 | -2.067 |
| 7229 | YRH | 839  | 0.0000469080 | 183.67 | 0.805 | -3.000 |
| 7230 | YRI | 1220 | 0.0000682095 | 184.97 | 0.811 | -0.433 |
| 7231 | YRL | 2454 | 0.0001372017 | 185.00 | 0.811 | -0.667 |
| 7232 | YRK | 1718 | 0.0000960523 | 186.10 | 0.816 | -3.233 |
| 7233 | YRM | 519  | 0.0000290170 | 186.00 | 0.815 | -1.300 |
| 7234 | YRF | 820  | 0.0000458457 | 194.30 | 0.851 | -1.000 |
| 7235 | YRP | 1410 | 0.0000788323 | 171.30 | 0.751 | -2.467 |
| 7236 | YRS | 2064 | 0.0001153970 | 162.13 | 0.710 | -2.200 |
| 7237 | YRT | 1343 | 0.0000750863 | 170.83 | 0.749 | -2.167 |
| 7238 | YRW | 388  | 0.0000216928 | 206.40 | 0.904 | -2.233 |
| 7239 | YRY | 777  | 0.0000434416 | 196.00 | 0.859 | -2.367 |
| 7240 | YRV | 1668 | 0.0000932569 | 176.67 | 0.774 | -0.533 |
| 7241 | YNA | 1076 | 0.0000601585 | 137.23 | 0.601 | -1.000 |
| 7242 | YNR | 901  | 0.0000503744 | 171.90 | 0.753 | -3.100 |
| 7243 | YNN | 927  | 0.0000518280 | 148.80 | 0.652 | -2.767 |
| 7244 | YND | 737  | 0.0000412052 | 146.33 | 0.641 | -2.767 |
| 7245 | YNC | 513  | 0.0000286815 | 141.67 | 0.621 | -0.767 |
| 7246 | YNQ | 869  | 0.0000485853 | 157.03 | 0.688 | -2.767 |
| 7247 | YNE | 1089 | 0.0000608853 | 154.63 | 0.678 | -2.767 |
| 7248 | YNG | 1057 | 0.0000590962 | 128.87 | 0.565 | -1.733 |
| 7249 | YNH | 458  | 0.0000256065 | 160.57 | 0.704 | -2.667 |
| 7250 | YNI | 1050 | 0.0000587049 | 161.87 | 0.709 | -0.100 |
| 7251 | YNL | 1678 | 0.0000938160 | 161.90 | 0.709 | -0.333 |
| 7252 | YNK | 988  | 0.0000552385 | 163.00 | 0.714 | -2.900 |
| 7253 | YNM | 385  | 0.0000215251 | 162.90 | 0.714 | -0.967 |
| 7254 | YNF | 847  | 0.0000473553 | 171.20 | 0.750 | -0.667 |
| 7255 | YNP | 1203 | 0.0000672590 | 148.20 | 0.649 | -2.133 |
| 7256 | YNS | 1395 | 0.0000779936 | 139.03 | 0.609 | -1.867 |
| 7257 | YNT | 980  | 0.0000547912 | 147.73 | 0.647 | -1.833 |
| 7258 | YNW | 271  | 0.0000151514 | 183.30 | 0.803 | -1.900 |
| 7259 | YNY | 778  | 0.0000434975 | 172.90 | 0.758 | -2.033 |
| 7260 | YNV | 1077 | 0.0000602144 | 153.57 | 0.673 | -0.200 |
| 7261 | YDA | 1238 | 0.0000692158 | 134.77 | 0.591 | -1.000 |
| 7262 | YDR | 1257 | 0.0000702781 | 169.43 | 0.742 | -3.100 |
| 7263 | YDN | 819  | 0.0000457898 | 146.33 | 0.641 | -2.767 |
| 7264 | YDD | 1144 | 0.0000639604 | 143.87 | 0.630 | -2.767 |
| 7265 | YDC | 506  | 0.0000282902 | 139.20 | 0.610 | -0.767 |
| 7266 | YDQ | 741  | 0.0000414289 | 154.57 | 0.677 | -2.767 |
| 7267 | YDE | 1396 | 0.0000780495 | 152.17 | 0.667 | -2.767 |
| 7268 | YDG | 1358 | 0.0000759250 | 126.40 | 0.554 | -1.733 |
| 7269 | YDH | 458  | 0.0000256065 | 158.10 | 0.693 | -2.667 |
| 7270 | YDI | 1179 | 0.0000659172 | 159.40 | 0.699 | -0.100 |
| 7271 | YDL | 2018 | 0.0001128252 | 159.43 | 0.699 | -0.333 |
| 7272 | YDK | 1073 | 0.0000599908 | 160.53 | 0.703 | -2.900 |
| 7273 | YDM | 426  | 0.0000238174 | 160.43 | 0.703 | -0.967 |
| 7274 | YDF | 878  | 0.0000490885 | 168.73 | 0.739 | -0.667 |

|      |     |      |              |        |       |        |
|------|-----|------|--------------|--------|-------|--------|
| 7275 | YDP | 1381 | 0.0000772109 | 145.73 | 0.639 | -2.133 |
| 7276 | YDS | 1561 | 0.0000872746 | 136.57 | 0.598 | -1.867 |
| 7277 | YDT | 1080 | 0.0000603822 | 145.27 | 0.637 | -1.833 |
| 7278 | YDW | 277  | 0.0000154869 | 180.83 | 0.792 | -1.900 |
| 7279 | YDY | 911  | 0.0000509335 | 170.43 | 0.747 | -2.033 |
| 7280 | YDV | 1292 | 0.0000722349 | 151.10 | 0.662 | -0.200 |
| 7281 | YCA | 604  | 0.0000337693 | 130.10 | 0.570 | 1.000  |
| 7282 | YCR | 810  | 0.0000452866 | 164.77 | 0.722 | -1.100 |
| 7283 | YCN | 560  | 0.0000313093 | 141.67 | 0.621 | -0.767 |
| 7284 | YCD | 618  | 0.0000345520 | 139.20 | 0.610 | -0.767 |
| 7285 | YCC | 345  | 0.0000192887 | 134.53 | 0.590 | 1.233  |
| 7286 | YCQ | 624  | 0.0000348875 | 149.90 | 0.657 | -0.767 |
| 7287 | YCE | 721  | 0.0000403107 | 147.50 | 0.646 | -0.767 |
| 7288 | YCG | 779  | 0.0000435534 | 121.73 | 0.533 | 0.267  |
| 7289 | YCH | 387  | 0.0000216369 | 153.43 | 0.672 | -0.667 |
| 7290 | YCI | 422  | 0.0000235938 | 154.73 | 0.678 | 1.900  |
| 7291 | YCL | 980  | 0.0000547912 | 154.77 | 0.678 | 1.667  |
| 7292 | YCK | 651  | 0.0000363970 | 155.87 | 0.683 | -0.900 |
| 7293 | YCM | 195  | 0.0000109023 | 155.77 | 0.683 | 1.033  |
| 7294 | YCF | 447  | 0.0000249915 | 164.07 | 0.719 | 1.333  |
| 7295 | YCP | 695  | 0.0000388570 | 141.07 | 0.618 | -0.133 |
| 7296 | YCS | 932  | 0.0000521076 | 131.90 | 0.578 | 0.133  |
| 7297 | YCT | 561  | 0.0000313652 | 140.60 | 0.616 | 0.167  |
| 7298 | YCW | 103  | 0.0000057587 | 176.17 | 0.772 | 0.100  |
| 7299 | YCY | 351  | 0.0000196242 | 165.77 | 0.726 | -0.033 |
| 7300 | YCV | 716  | 0.0000400311 | 146.43 | 0.642 | 1.800  |
| 7301 | YQA | 1387 | 0.0000775463 | 145.47 | 0.637 | -1.000 |
| 7302 | YQR | 1286 | 0.0000718995 | 180.13 | 0.789 | -3.100 |
| 7303 | YQN | 863  | 0.0000482498 | 157.03 | 0.688 | -2.767 |
| 7304 | YQD | 1071 | 0.0000598790 | 154.57 | 0.677 | -2.767 |
| 7305 | YQC | 930  | 0.0000519957 | 149.90 | 0.657 | -0.767 |
| 7306 | YQQ | 1280 | 0.0000715640 | 165.27 | 0.724 | -2.767 |
| 7307 | YQE | 1867 | 0.0001043829 | 162.87 | 0.714 | -2.767 |
| 7308 | YQG | 1348 | 0.0000753659 | 137.10 | 0.601 | -1.733 |
| 7309 | YQH | 599  | 0.0000334897 | 168.80 | 0.740 | -2.667 |
| 7310 | YQI | 914  | 0.0000511012 | 170.10 | 0.745 | -0.100 |
| 7311 | YQL | 2057 | 0.0001150056 | 170.13 | 0.746 | -0.333 |
| 7312 | YQK | 1289 | 0.0000720672 | 171.23 | 0.750 | -2.900 |
| 7313 | YQM | 477  | 0.0000266688 | 171.13 | 0.750 | -0.967 |
| 7314 | YQF | 755  | 0.0000422116 | 179.43 | 0.786 | -0.667 |
| 7315 | YQP | 1142 | 0.0000638485 | 156.43 | 0.686 | -2.133 |
| 7316 | YQS | 1224 | 0.0000684331 | 147.27 | 0.645 | -1.867 |
| 7317 | YQT | 951  | 0.0000531698 | 155.97 | 0.683 | -1.833 |
| 7318 | YQW | 239  | 0.0000133623 | 191.53 | 0.839 | -1.900 |
| 7319 | YQY | 652  | 0.0000364529 | 181.13 | 0.794 | -2.033 |
| 7320 | YQV | 1317 | 0.0000736327 | 161.80 | 0.709 | -0.200 |
| 7321 | YEA | 1905 | 0.0001065074 | 143.07 | 0.627 | -1.000 |
| 7322 | YER | 1409 | 0.0000787763 | 177.73 | 0.779 | -3.100 |
| 7323 | YEN | 1233 | 0.0000689363 | 154.63 | 0.678 | -2.767 |
| 7324 | YED | 1792 | 0.0001001896 | 152.17 | 0.667 | -2.767 |
| 7325 | YEC | 2591 | 0.0001448613 | 147.50 | 0.646 | -0.767 |
| 7326 | YEQ | 1122 | 0.0000627303 | 162.87 | 0.714 | -2.767 |

|      |     |      |              |        |       |        |
|------|-----|------|--------------|--------|-------|--------|
| 7327 | YEE | 2848 | 0.0001592300 | 160.47 | 0.703 | -2.767 |
| 7328 | YEG | 1593 | 0.0000890637 | 134.70 | 0.590 | -1.733 |
| 7329 | YEH | 601  | 0.0000336016 | 166.40 | 0.729 | -2.667 |
| 7330 | YEI | 1311 | 0.0000732972 | 167.70 | 0.735 | -0.100 |
| 7331 | YEL | 2189 | 0.0001223857 | 167.73 | 0.735 | -0.333 |
| 7332 | YEK | 2098 | 0.0001172979 | 168.83 | 0.740 | -2.900 |
| 7333 | YEM | 655  | 0.0000366207 | 168.73 | 0.739 | -0.967 |
| 7334 | YEF | 1039 | 0.0000580899 | 177.03 | 0.776 | -0.667 |
| 7335 | YEP | 1001 | 0.0000559653 | 154.03 | 0.675 | -2.133 |
| 7336 | YES | 1560 | 0.0000872187 | 144.87 | 0.635 | -1.867 |
| 7337 | YET | 1366 | 0.0000763722 | 153.57 | 0.673 | -1.833 |
| 7338 | YEW | 268  | 0.0000149837 | 189.13 | 0.829 | -1.900 |
| 7339 | YEY | 716  | 0.0000400311 | 178.73 | 0.783 | -2.033 |
| 7340 | YEV | 1729 | 0.0000966674 | 159.40 | 0.699 | -0.200 |
| 7341 | YGA | 1950 | 0.0001090233 | 117.30 | 0.514 | 0.033  |
| 7342 | YGR | 1507 | 0.0000842555 | 151.97 | 0.666 | -2.067 |
| 7343 | YGN | 1383 | 0.0000773227 | 128.87 | 0.565 | -1.733 |
| 7344 | YGD | 1363 | 0.0000762045 | 126.40 | 0.554 | -1.733 |
| 7345 | YGC | 817  | 0.0000456780 | 121.73 | 0.533 | 0.267  |
| 7346 | YGO | 1248 | 0.0000697749 | 137.10 | 0.601 | -1.733 |
| 7347 | YGE | 1586 | 0.0000886723 | 134.70 | 0.590 | -1.733 |
| 7348 | YGG | 2119 | 0.0001184720 | 108.93 | 0.477 | -0.700 |
| 7349 | YGH | 768  | 0.0000429384 | 140.63 | 0.616 | -1.633 |
| 7350 | YGI | 1303 | 0.0000728500 | 141.93 | 0.622 | 0.933  |
| 7351 | YGL | 2316 | 0.0001294862 | 141.97 | 0.622 | 0.700  |
| 7352 | YGK | 1769 | 0.0000989037 | 143.07 | 0.627 | -1.867 |
| 7353 | YGM | 583  | 0.0000325952 | 142.97 | 0.626 | 0.067  |
| 7354 | YGF | 1245 | 0.0000696072 | 151.27 | 0.663 | 0.367  |
| 7355 | YGP | 1620 | 0.0000905732 | 128.27 | 0.562 | -1.100 |
| 7356 | YGS | 2390 | 0.0001336235 | 119.10 | 0.522 | -0.833 |
| 7357 | YGT | 1517 | 0.0000848146 | 127.80 | 0.560 | -0.800 |
| 7358 | YGW | 304  | 0.0000169965 | 163.37 | 0.716 | -0.867 |
| 7359 | YGY | 972  | 0.0000543439 | 152.97 | 0.670 | -1.000 |
| 7360 | YGV | 1775 | 0.0000992392 | 133.63 | 0.586 | 0.833  |
| 7361 | YHA | 736  | 0.0000411493 | 149.00 | 0.653 | -0.900 |
| 7362 | YHR | 734  | 0.0000410375 | 183.67 | 0.805 | -3.000 |
| 7363 | YHN | 488  | 0.0000272838 | 160.57 | 0.704 | -2.667 |
| 7364 | YHD | 509  | 0.0000284579 | 158.10 | 0.693 | -2.667 |
| 7365 | YHC | 524  | 0.0000292965 | 153.43 | 0.672 | -0.667 |
| 7366 | YHQ | 638  | 0.0000356702 | 168.80 | 0.740 | -2.667 |
| 7367 | YHE | 602  | 0.0000336575 | 166.40 | 0.729 | -2.667 |
| 7368 | YHG | 800  | 0.0000447275 | 140.63 | 0.616 | -1.633 |
| 7369 | YHH | 415  | 0.0000232024 | 172.33 | 0.755 | -2.567 |
| 7370 | YHI | 607  | 0.0000339370 | 173.63 | 0.761 | 0.000  |
| 7371 | YHL | 1418 | 0.0000792795 | 173.67 | 0.761 | -0.233 |
| 7372 | YHK | 664  | 0.0000371238 | 174.77 | 0.766 | -2.800 |
| 7373 | YHM | 292  | 0.0000163255 | 174.67 | 0.765 | -0.867 |
| 7374 | YHF | 489  | 0.0000273397 | 182.97 | 0.802 | -0.567 |
| 7375 | YHP | 783  | 0.0000437771 | 159.97 | 0.701 | -2.033 |
| 7376 | YHS | 1083 | 0.0000605499 | 150.80 | 0.661 | -1.767 |
| 7377 | YHT | 660  | 0.0000369002 | 159.50 | 0.699 | -1.733 |
| 7378 | YHW | 183  | 0.0000102314 | 195.07 | 0.855 | -1.800 |

|      |     |      |              |        |       |        |
|------|-----|------|--------------|--------|-------|--------|
| 7379 | YHY | 487  | 0.0000272279 | 184.67 | 0.809 | -1.933 |
| 7380 | YHV | 781  | 0.0000436652 | 165.33 | 0.725 | -0.100 |
| 7381 | YIA | 1338 | 0.0000748068 | 150.30 | 0.659 | 1.667  |
| 7382 | YIR | 1307 | 0.0000730736 | 184.97 | 0.811 | -0.433 |
| 7383 | YIN | 1121 | 0.0000626744 | 161.87 | 0.709 | -0.100 |
| 7384 | YID | 1141 | 0.0000637926 | 159.40 | 0.699 | -0.100 |
| 7385 | YIC | 1094 | 0.0000611649 | 154.73 | 0.678 | 1.900  |
| 7386 | YIQ | 1126 | 0.0000629540 | 170.10 | 0.745 | -0.100 |
| 7387 | YIE | 1344 | 0.0000751422 | 167.70 | 0.735 | -0.100 |
| 7388 | YIG | 1032 | 0.0000576985 | 141.93 | 0.622 | 0.933  |
| 7389 | YIH | 1054 | 0.0000589285 | 173.63 | 0.761 | 0.000  |
| 7390 | YII | 1132 | 0.0000632894 | 174.93 | 0.767 | 2.567  |
| 7391 | YIL | 2260 | 0.0001263552 | 174.97 | 0.767 | 2.333  |
| 7392 | YIK | 1281 | 0.0000716199 | 176.07 | 0.772 | -0.233 |
| 7393 | YIM | 456  | 0.0000254947 | 175.97 | 0.771 | 1.700  |
| 7394 | YIF | 1171 | 0.0000654699 | 184.27 | 0.807 | 2.000  |
| 7395 | YIP | 1520 | 0.0000849823 | 161.27 | 0.707 | 0.533  |
| 7396 | YIS | 1858 | 0.0001038797 | 152.10 | 0.667 | 0.800  |
| 7397 | YIT | 1222 | 0.0000683213 | 160.80 | 0.705 | 0.833  |
| 7398 | YIW | 273  | 0.0000152633 | 196.37 | 0.861 | 0.767  |
| 7399 | YIY | 1084 | 0.0000606058 | 185.97 | 0.815 | 0.633  |
| 7400 | YIV | 1368 | 0.0000764841 | 166.63 | 0.730 | 2.467  |
| 7401 | YLA | 3097 | 0.0001731514 | 150.33 | 0.659 | 1.433  |
| 7402 | YLR | 2646 | 0.0001479363 | 185.00 | 0.811 | -0.667 |
| 7403 | YLN | 1943 | 0.0001086320 | 161.90 | 0.709 | -0.333 |
| 7404 | YLD | 2390 | 0.0001336235 | 159.43 | 0.699 | -0.333 |
| 7405 | YLC | 1179 | 0.0000659172 | 154.77 | 0.678 | 1.667  |
| 7406 | YLQ | 2580 | 0.0001442463 | 170.13 | 0.746 | -0.333 |
| 7407 | YLE | 3329 | 0.0001861224 | 167.73 | 0.735 | -0.333 |
| 7408 | YLG | 2608 | 0.0001458117 | 141.97 | 0.622 | 0.700  |
| 7409 | YLH | 1452 | 0.0000811804 | 173.67 | 0.761 | -0.233 |
| 7410 | YLI | 1903 | 0.0001063956 | 174.97 | 0.767 | 2.333  |
| 7411 | YLL | 4375 | 0.0002446036 | 175.00 | 0.767 | 2.100  |
| 7412 | YLK | 2555 | 0.0001428485 | 176.10 | 0.772 | -0.467 |
| 7413 | YLM | 911  | 0.0000509335 | 176.00 | 0.771 | 1.467  |
| 7414 | YLF | 1692 | 0.0000945987 | 184.30 | 0.808 | 1.767  |
| 7415 | YLP | 2450 | 0.0001369780 | 161.30 | 0.707 | 0.300  |
| 7416 | YLS | 3463 | 0.0001936143 | 152.13 | 0.667 | 0.567  |
| 7417 | YLT | 2479 | 0.0001385994 | 160.83 | 0.705 | 0.600  |
| 7418 | YLW | 606  | 0.0000338811 | 196.40 | 0.861 | 0.533  |
| 7419 | YLY | 1343 | 0.0000750863 | 186.00 | 0.815 | 0.400  |
| 7420 | YLV | 2600 | 0.0001453644 | 166.67 | 0.730 | 2.233  |
| 7421 | YKA | 1435 | 0.0000802300 | 151.43 | 0.664 | -1.133 |
| 7422 | YKR | 1180 | 0.0000659731 | 186.10 | 0.816 | -3.233 |
| 7423 | YKN | 1155 | 0.0000645754 | 163.00 | 0.714 | -2.900 |
| 7424 | YKD | 1534 | 0.0000857650 | 160.53 | 0.703 | -2.900 |
| 7425 | YKC | 3304 | 0.0001847247 | 155.87 | 0.683 | -0.900 |
| 7426 | YKQ | 1052 | 0.0000588167 | 171.23 | 0.750 | -2.900 |
| 7427 | YKE | 1964 | 0.0001098061 | 168.83 | 0.740 | -2.900 |
| 7428 | YKG | 1515 | 0.0000847027 | 143.07 | 0.627 | -1.867 |
| 7429 | YKH | 611  | 0.0000341606 | 174.77 | 0.766 | -2.800 |
| 7430 | YKI | 1111 | 0.0000621153 | 176.07 | 0.772 | -0.233 |

|      |     |      |              |        |       |        |
|------|-----|------|--------------|--------|-------|--------|
| 7431 | YKL | 1828 | 0.0001022024 | 176.10 | 0.772 | -0.467 |
| 7432 | YKK | 1786 | 0.0000998542 | 177.20 | 0.777 | -3.033 |
| 7433 | YKM | 548  | 0.0000306384 | 177.10 | 0.776 | -1.100 |
| 7434 | YKF | 883  | 0.0000493680 | 185.40 | 0.812 | -0.800 |
| 7435 | YKP | 1124 | 0.0000628422 | 162.40 | 0.712 | -2.267 |
| 7436 | YKS | 1534 | 0.0000857650 | 153.23 | 0.671 | -2.000 |
| 7437 | YKT | 1136 | 0.0000635131 | 161.93 | 0.710 | -1.967 |
| 7438 | YKW | 301  | 0.0000168287 | 197.50 | 0.865 | -2.033 |
| 7439 | YKY | 821  | 0.0000459016 | 187.10 | 0.820 | -2.167 |
| 7440 | YKV | 1420 | 0.0000793913 | 167.77 | 0.735 | -0.333 |
| 7441 | YMA | 777  | 0.0000434416 | 151.33 | 0.663 | 0.800  |
| 7442 | YMR | 472  | 0.0000263892 | 186.00 | 0.815 | -1.300 |
| 7443 | YMN | 448  | 0.0000250474 | 162.90 | 0.714 | -0.967 |
| 7444 | YMD | 491  | 0.0000274515 | 160.43 | 0.703 | -0.967 |
| 7445 | YMC | 415  | 0.0000232024 | 155.77 | 0.683 | 1.033  |
| 7446 | YMQ | 358  | 0.0000200156 | 171.13 | 0.750 | -0.967 |
| 7447 | YME | 758  | 0.0000423793 | 168.73 | 0.739 | -0.967 |
| 7448 | YMG | 545  | 0.0000304706 | 142.97 | 0.626 | 0.067  |
| 7449 | YMH | 237  | 0.0000132505 | 174.67 | 0.765 | -0.867 |
| 7450 | YMI | 416  | 0.0000232583 | 175.97 | 0.771 | 1.700  |
| 7451 | YML | 773  | 0.0000432180 | 176.00 | 0.771 | 1.467  |
| 7452 | YMK | 640  | 0.0000357820 | 177.10 | 0.776 | -1.100 |
| 7453 | YMM | 195  | 0.0000109023 | 177.00 | 0.776 | 0.833  |
| 7454 | YMF | 320  | 0.0000178910 | 185.30 | 0.812 | 1.133  |
| 7455 | YMP | 459  | 0.0000256624 | 162.30 | 0.711 | -0.333 |
| 7456 | YMS | 585  | 0.0000327070 | 153.13 | 0.671 | -0.067 |
| 7457 | YMT | 384  | 0.0000214692 | 161.83 | 0.709 | -0.033 |
| 7458 | YMW | 95   | 0.0000053114 | 197.40 | 0.865 | -0.100 |
| 7459 | YMY | 471  | 0.0000263333 | 187.00 | 0.819 | -0.233 |
| 7460 | YMV | 587  | 0.0000328188 | 167.67 | 0.735 | 1.600  |
| 7461 | YFA | 1156 | 0.0000646313 | 159.63 | 0.700 | 1.100  |
| 7462 | YFR | 1222 | 0.0000683213 | 194.30 | 0.851 | -1.000 |
| 7463 | YFN | 851  | 0.0000475789 | 171.20 | 0.750 | -0.667 |
| 7464 | YFD | 881  | 0.0000492562 | 168.73 | 0.739 | -0.667 |
| 7465 | YFC | 567  | 0.0000317006 | 164.07 | 0.719 | 1.333  |
| 7466 | YFQ | 858  | 0.0000479703 | 179.43 | 0.786 | -0.667 |
| 7467 | YFE | 1193 | 0.0000666999 | 177.03 | 0.776 | -0.667 |
| 7468 | YFG | 1219 | 0.0000681536 | 151.27 | 0.663 | 0.367  |
| 7469 | YFH | 611  | 0.0000341606 | 182.97 | 0.802 | -0.567 |
| 7470 | YFI | 1255 | 0.0000701663 | 184.27 | 0.807 | 2.000  |
| 7471 | YFL | 2081 | 0.0001163475 | 184.30 | 0.808 | 1.767  |
| 7472 | YFK | 1058 | 0.0000591521 | 185.40 | 0.812 | -0.800 |
| 7473 | YFM | 415  | 0.0000232024 | 185.30 | 0.812 | 1.133  |
| 7474 | YFF | 1111 | 0.0000621153 | 193.60 | 0.848 | 1.433  |
| 7475 | YFP | 1035 | 0.0000578662 | 170.60 | 0.748 | -0.033 |
| 7476 | YFS | 1809 | 0.0001011401 | 161.43 | 0.707 | 0.233  |
| 7477 | YFT | 1201 | 0.0000671472 | 170.13 | 0.746 | 0.267  |
| 7478 | YFW | 274  | 0.0000153192 | 205.70 | 0.901 | 0.200  |
| 7479 | YFY | 734  | 0.0000410375 | 195.30 | 0.856 | 0.067  |
| 7480 | YFV | 1277 | 0.0000713963 | 175.97 | 0.771 | 1.900  |
| 7481 | YPA | 1629 | 0.0000910764 | 136.63 | 0.599 | -0.367 |
| 7482 | YPR | 1046 | 0.0000584812 | 171.30 | 0.751 | -2.467 |



|      |     |      |              |        |       |        |
|------|-----|------|--------------|--------|-------|--------|
| 7483 | YPN | 932  | 0.0000521076 | 148.20 | 0.649 | -2.133 |
| 7484 | YPD | 1325 | 0.0000740800 | 145.73 | 0.639 | -2.133 |
| 7485 | YPC | 540  | 0.0000301911 | 141.07 | 0.618 | -0.133 |
| 7486 | YPQ | 977  | 0.0000546235 | 156.43 | 0.686 | -2.133 |
| 7487 | YPE | 1720 | 0.0000961642 | 154.03 | 0.675 | -2.133 |
| 7488 | YPG | 2062 | 0.0001152852 | 128.27 | 0.562 | -1.100 |
| 7489 | YPH | 654  | 0.0000365647 | 159.97 | 0.701 | -2.033 |
| 7490 | YPI | 749  | 0.0000418761 | 161.27 | 0.707 | 0.533  |
| 7491 | YPL | 1838 | 0.0001027615 | 161.30 | 0.707 | 0.300  |
| 7492 | YPK | 1041 | 0.0000582017 | 162.40 | 0.712 | -2.267 |
| 7493 | YPM | 412  | 0.0000230347 | 162.30 | 0.711 | -0.333 |
| 7494 | YPF | 826  | 0.0000461812 | 170.60 | 0.748 | -0.033 |
| 7495 | YPP | 1792 | 0.0001001896 | 147.60 | 0.647 | -1.500 |
| 7496 | YPS | 1955 | 0.0001093029 | 138.43 | 0.607 | -1.233 |
| 7497 | YPT | 1101 | 0.0000615562 | 147.13 | 0.645 | -1.200 |
| 7498 | YPW | 307  | 0.0000171642 | 182.70 | 0.801 | -1.267 |
| 7499 | YPY | 670  | 0.0000374593 | 172.30 | 0.755 | -1.400 |
| 7500 | YPV | 1366 | 0.0000763722 | 152.97 | 0.670 | 0.433  |
| 7501 | YSA | 2140 | 0.0001196461 | 127.47 | 0.559 | -0.100 |
| 7502 | YSR | 1940 | 0.0001084642 | 162.13 | 0.710 | -2.200 |
| 7503 | YSN | 1309 | 0.0000731854 | 139.03 | 0.609 | -1.867 |
| 7504 | YSD | 1805 | 0.0001009165 | 136.57 | 0.598 | -1.867 |
| 7505 | YSC | 1285 | 0.0000718436 | 131.90 | 0.578 | 0.133  |
| 7506 | YSQ | 1709 | 0.0000955492 | 147.27 | 0.645 | -1.867 |
| 7507 | YSE | 2140 | 0.0001196461 | 144.87 | 0.635 | -1.867 |
| 7508 | YSG | 2286 | 0.0001278089 | 119.10 | 0.522 | -0.833 |
| 7509 | YSH | 1060 | 0.0000592640 | 150.80 | 0.661 | -1.767 |
| 7510 | YSI | 1704 | 0.0000952696 | 152.10 | 0.667 | 0.800  |
| 7511 | YSL | 3866 | 0.0002161457 | 152.13 | 0.667 | 0.567  |
| 7512 | YSK | 1682 | 0.0000940396 | 153.23 | 0.671 | -2.000 |
| 7513 | YSM | 716  | 0.0000400311 | 153.13 | 0.671 | -0.067 |
| 7514 | YSF | 1668 | 0.0000932569 | 161.43 | 0.707 | 0.233  |
| 7515 | YSP | 2279 | 0.0001274175 | 138.43 | 0.607 | -1.233 |
| 7516 | YSS | 3827 | 0.0002139653 | 129.27 | 0.566 | -0.967 |
| 7517 | YST | 2157 | 0.0001205966 | 137.97 | 0.605 | -0.933 |
| 7518 | YSW | 535  | 0.0000299115 | 173.53 | 0.760 | -1.000 |
| 7519 | YSY | 1168 | 0.0000653022 | 163.13 | 0.715 | -1.133 |
| 7520 | YSV | 2284 | 0.0001276971 | 143.80 | 0.630 | 0.700  |
| 7521 | YTA | 1683 | 0.0000940955 | 136.17 | 0.597 | -0.067 |
| 7522 | YTR | 1114 | 0.0000622831 | 170.83 | 0.749 | -2.167 |
| 7523 | YTN | 839  | 0.0000469080 | 147.73 | 0.647 | -1.833 |
| 7524 | YTD | 1187 | 0.0000663645 | 145.27 | 0.637 | -1.833 |
| 7525 | YTC | 1457 | 0.0000814600 | 140.60 | 0.616 | 0.167  |
| 7526 | YTQ | 941  | 0.0000526107 | 155.97 | 0.683 | -1.833 |
| 7527 | YTE | 1429 | 0.0000798945 | 153.57 | 0.673 | -1.833 |
| 7528 | YTG | 1649 | 0.0000921946 | 127.80 | 0.560 | -0.800 |
| 7529 | YTH | 831  | 0.0000464607 | 159.50 | 0.699 | -1.733 |
| 7530 | YTI | 1265 | 0.0000707254 | 160.80 | 0.705 | 0.833  |
| 7531 | YTL | 2589 | 0.0001447494 | 160.83 | 0.705 | 0.600  |
| 7532 | YTK | 1113 | 0.0000622272 | 161.93 | 0.710 | -1.967 |
| 7533 | YTM | 564  | 0.0000315329 | 161.83 | 0.709 | -0.033 |
| 7534 | YTF | 1144 | 0.0000639604 | 170.13 | 0.746 | 0.267  |

|      |     |      |              |        |       |        |
|------|-----|------|--------------|--------|-------|--------|
| 7535 | YTP | 1413 | 0.0000790000 | 147.13 | 0.645 | -1.200 |
| 7536 | YTS | 1816 | 0.0001015315 | 137.97 | 0.605 | -0.933 |
| 7537 | YTT | 1268 | 0.0000708931 | 146.67 | 0.643 | -0.900 |
| 7538 | YTW | 343  | 0.0000191769 | 182.23 | 0.799 | -0.967 |
| 7539 | YTY | 1082 | 0.0000604940 | 171.83 | 0.753 | -1.100 |
| 7540 | YTV | 1858 | 0.0001038797 | 152.50 | 0.668 | 0.733  |
| 7541 | YWA | 391  | 0.0000218606 | 171.73 | 0.753 | -0.133 |
| 7542 | YWR | 418  | 0.0000233701 | 206.40 | 0.904 | -2.233 |
| 7543 | YWN | 351  | 0.0000196242 | 183.30 | 0.803 | -1.900 |
| 7544 | YWD | 312  | 0.0000174437 | 180.83 | 0.792 | -1.900 |
| 7545 | YWC | 174  | 0.0000097282 | 176.17 | 0.772 | 0.100  |
| 7546 | YWQ | 240  | 0.0000134183 | 191.53 | 0.839 | -1.900 |
| 7547 | YWE | 503  | 0.0000281224 | 189.13 | 0.829 | -1.900 |
| 7548 | YWG | 311  | 0.0000173878 | 163.37 | 0.716 | -0.867 |
| 7549 | YWH | 137  | 0.0000076596 | 195.07 | 0.855 | -1.800 |
| 7550 | YWI | 276  | 0.0000154310 | 196.37 | 0.861 | 0.767  |
| 7551 | YWL | 579  | 0.0000323715 | 196.40 | 0.861 | 0.533  |
| 7552 | YWK | 467  | 0.0000261097 | 197.50 | 0.865 | -2.033 |
| 7553 | YWM | 171  | 0.0000095605 | 197.40 | 0.865 | -0.100 |
| 7554 | YWF | 208  | 0.0000116292 | 205.70 | 0.901 | 0.200  |
| 7555 | YWP | 363  | 0.0000202951 | 182.70 | 0.801 | -1.267 |
| 7556 | YWS | 400  | 0.0000223638 | 173.53 | 0.760 | -1.000 |
| 7557 | YWT | 422  | 0.0000235938 | 182.23 | 0.799 | -0.967 |
| 7558 | YWW | 77   | 0.0000043050 | 217.80 | 0.954 | -1.033 |
| 7559 | YWY | 187  | 0.0000104551 | 207.40 | 0.909 | -1.167 |
| 7560 | YWV | 367  | 0.0000205187 | 188.07 | 0.824 | 0.667  |
| 7561 | YYA | 819  | 0.0000457898 | 161.33 | 0.707 | -0.267 |
| 7562 | YYR | 1070 | 0.0000598231 | 196.00 | 0.859 | -2.367 |
| 7563 | YYN | 739  | 0.0000413170 | 172.90 | 0.758 | -2.033 |
| 7564 | YYD | 756  | 0.0000422675 | 170.43 | 0.747 | -2.033 |
| 7565 | YYC | 498  | 0.0000278429 | 165.77 | 0.726 | -0.033 |
| 7566 | YYQ | 807  | 0.0000451189 | 181.13 | 0.794 | -2.033 |
| 7567 | YYE | 1039 | 0.0000580899 | 178.73 | 0.783 | -2.033 |
| 7568 | YYG | 944  | 0.0000527785 | 152.97 | 0.670 | -1.000 |
| 7569 | YYH | 443  | 0.0000247679 | 184.67 | 0.809 | -1.933 |
| 7570 | YYI | 702  | 0.0000392484 | 185.97 | 0.815 | 0.633  |
| 7571 | YYL | 1382 | 0.0000772668 | 186.00 | 0.815 | 0.400  |
| 7572 | YYK | 837  | 0.0000467962 | 187.10 | 0.820 | -2.167 |
| 7573 | YYM | 287  | 0.0000160460 | 187.00 | 0.819 | -0.233 |
| 7574 | YYF | 779  | 0.0000435534 | 195.30 | 0.856 | 0.067  |
| 7575 | YYP | 700  | 0.0000391366 | 172.30 | 0.755 | -1.400 |
| 7576 | YYS | 1266 | 0.0000707813 | 163.13 | 0.715 | -1.133 |
| 7577 | YYT | 763  | 0.0000426589 | 171.83 | 0.753 | -1.100 |
| 7578 | YYW | 245  | 0.0000136978 | 207.40 | 0.909 | -1.167 |
| 7579 | YYY | 697  | 0.0000389689 | 197.00 | 0.863 | -1.300 |
| 7580 | YYV | 809  | 0.0000452307 | 177.67 | 0.779 | 0.533  |
| 7581 | YVA | 2071 | 0.0001157884 | 142.00 | 0.622 | 1.567  |
| 7582 | YVR | 1375 | 0.0000768754 | 176.67 | 0.774 | -0.533 |
| 7583 | YVN | 1079 | 0.0000603262 | 153.57 | 0.673 | -0.200 |
| 7584 | YVD | 1307 | 0.0000730736 | 151.10 | 0.662 | -0.200 |
| 7585 | YVC | 1179 | 0.0000659172 | 146.43 | 0.642 | 1.800  |
| 7586 | YVQ | 1099 | 0.0000614444 | 161.80 | 0.709 | -0.200 |

|      |     |      |              |        |       |        |
|------|-----|------|--------------|--------|-------|--------|
| 7587 | YVE | 1584 | 0.0000885605 | 159.40 | 0.699 | -0.200 |
| 7588 | YVG | 1545 | 0.0000863800 | 133.63 | 0.586 | 0.833  |
| 7589 | YVH | 789  | 0.0000441125 | 165.33 | 0.725 | -0.100 |
| 7590 | YVI | 1230 | 0.0000687686 | 166.63 | 0.730 | 2.467  |
| 7591 | YVL | 2567 | 0.0001435194 | 166.67 | 0.730 | 2.233  |
| 7592 | YVK | 1512 | 0.0000845350 | 167.77 | 0.735 | -0.333 |
| 7593 | YVM | 537  | 0.0000300233 | 167.67 | 0.735 | 1.600  |
| 7594 | YVF | 1145 | 0.0000640163 | 175.97 | 0.771 | 1.900  |
| 7595 | YVP | 1493 | 0.0000834727 | 152.97 | 0.670 | 0.433  |
| 7596 | YVS | 1888 | 0.0001055569 | 143.80 | 0.630 | 0.700  |
| 7597 | YVT | 1464 | 0.0000818514 | 152.50 | 0.668 | 0.733  |
| 7598 | YVW | 308  | 0.0000172201 | 188.07 | 0.824 | 0.667  |
| 7599 | YVY | 1242 | 0.0000694395 | 177.67 | 0.779 | 0.533  |
| 7600 | YVV | 1715 | 0.0000958846 | 158.33 | 0.694 | 2.367  |
| 7601 | VAA | 7948 | 0.0004443679 | 106.33 | 0.466 | 2.600  |
| 7602 | VAR | 3971 | 0.0002220162 | 141.00 | 0.618 | 0.500  |
| 7603 | VAN | 2341 | 0.0001308839 | 117.90 | 0.517 | 0.833  |
| 7604 | VAD | 3217 | 0.0001798605 | 115.43 | 0.506 | 0.833  |
| 7605 | VAC | 1458 | 0.0000815159 | 110.77 | 0.485 | 2.833  |
| 7606 | VAQ | 3478 | 0.0001944529 | 126.13 | 0.553 | 0.833  |
| 7607 | VAE | 5583 | 0.0003121422 | 123.73 | 0.542 | 0.833  |
| 7608 | VAG | 5678 | 0.0003174536 | 97.97  | 0.429 | 1.867  |
| 7609 | VAH | 1809 | 0.0001011401 | 129.67 | 0.568 | 0.933  |
| 7610 | VAI | 3494 | 0.0001953474 | 130.97 | 0.574 | 3.500  |
| 7611 | VAL | 7436 | 0.0004157423 | 131.00 | 0.574 | 3.267  |
| 7612 | VAK | 3388 | 0.0001894210 | 132.10 | 0.579 | 0.700  |
| 7613 | VAM | 1561 | 0.0000872746 | 132.00 | 0.578 | 2.633  |
| 7614 | VAF | 2857 | 0.0001597332 | 140.30 | 0.615 | 2.933  |
| 7615 | VAP | 4212 | 0.0002354904 | 117.30 | 0.514 | 1.467  |
| 7616 | VAS | 6203 | 0.0003468060 | 108.13 | 0.474 | 1.733  |
| 7617 | VAT | 4240 | 0.0002370559 | 116.83 | 0.512 | 1.767  |
| 7618 | VAW | 930  | 0.0000519957 | 152.40 | 0.668 | 1.700  |
| 7619 | VAY | 1630 | 0.0000911323 | 142.00 | 0.622 | 1.567  |
| 7620 | VAV | 6619 | 0.0003700643 | 122.67 | 0.538 | 3.400  |
| 7621 | VRA | 4521 | 0.0002527664 | 141.00 | 0.618 | 0.500  |
| 7622 | VRR | 3868 | 0.0002162576 | 175.67 | 0.770 | -1.600 |
| 7623 | VRN | 1945 | 0.0001087438 | 152.57 | 0.669 | -1.267 |
| 7624 | VRD | 2730 | 0.0001526327 | 150.10 | 0.658 | -1.267 |
| 7625 | VRC | 1244 | 0.0000695513 | 145.43 | 0.637 | 0.733  |
| 7626 | VRQ | 2553 | 0.0001427367 | 160.80 | 0.705 | -1.267 |
| 7627 | VRE | 3905 | 0.0002183262 | 158.40 | 0.694 | -1.267 |
| 7628 | VRG | 3727 | 0.0002083743 | 132.63 | 0.581 | -0.233 |
| 7629 | VRH | 1417 | 0.0000792236 | 164.33 | 0.720 | -1.167 |
| 7630 | VRI | 2278 | 0.0001273616 | 165.63 | 0.726 | 1.400  |
| 7631 | VRL | 4962 | 0.0002774225 | 165.67 | 0.726 | 1.167  |
| 7632 | VRK | 3257 | 0.0001820969 | 166.77 | 0.731 | -1.400 |
| 7633 | VRM | 1041 | 0.0000582017 | 166.67 | 0.730 | 0.533  |
| 7634 | VRF | 1958 | 0.0001094706 | 174.97 | 0.767 | 0.833  |
| 7635 | VRP | 2869 | 0.0001604041 | 151.97 | 0.666 | -0.633 |
| 7636 | VRS | 3698 | 0.0002067530 | 142.80 | 0.626 | -0.367 |
| 7637 | VRT | 3023 | 0.0001690141 | 151.50 | 0.664 | -0.333 |
| 7638 | VRW | 702  | 0.0000392484 | 187.07 | 0.820 | -0.400 |

|      |     |      |              |        |       |        |
|------|-----|------|--------------|--------|-------|--------|
| 7639 | VRY | 1298 | 0.0000725704 | 176.67 | 0.774 | -0.533 |
| 7640 | VRV | 3656 | 0.0002044048 | 157.33 | 0.689 | 1.300  |
| 7641 | VNA | 2365 | 0.0001322257 | 117.90 | 0.517 | 0.833  |
| 7642 | VNR | 1714 | 0.0000958287 | 152.57 | 0.669 | -1.267 |
| 7643 | VNN | 1567 | 0.0000876100 | 129.47 | 0.567 | -0.933 |
| 7644 | VND | 1980 | 0.0001107006 | 127.00 | 0.557 | -0.933 |
| 7645 | VNC | 917  | 0.0000512689 | 122.33 | 0.536 | 1.067  |
| 7646 | VNQ | 1597 | 0.0000892873 | 137.70 | 0.603 | -0.933 |
| 7647 | VNE | 2364 | 0.0001321698 | 135.30 | 0.593 | -0.933 |
| 7648 | VNG | 3124 | 0.0001746610 | 109.53 | 0.480 | 0.100  |
| 7649 | VNH | 919  | 0.0000513807 | 141.23 | 0.619 | -0.833 |
| 7650 | VNI | 2150 | 0.0001202052 | 142.53 | 0.625 | 1.733  |
| 7651 | VNL | 3525 | 0.0001970806 | 142.57 | 0.625 | 1.500  |
| 7652 | VNK | 2202 | 0.0001231125 | 143.67 | 0.630 | -1.067 |
| 7653 | VNM | 868  | 0.0000485294 | 143.57 | 0.629 | 0.867  |
| 7654 | VNF | 1451 | 0.0000811245 | 151.87 | 0.665 | 1.167  |
| 7655 | VNP | 1958 | 0.0001094706 | 128.87 | 0.565 | -0.300 |
| 7656 | VNS | 3107 | 0.0001737105 | 119.70 | 0.525 | -0.033 |
| 7657 | VNT | 2052 | 0.0001147261 | 128.40 | 0.563 | 0.000  |
| 7658 | VNW | 469  | 0.0000262215 | 163.97 | 0.719 | -0.067 |
| 7659 | VNY | 1171 | 0.0000654699 | 153.57 | 0.673 | -0.200 |
| 7660 | VNV | 2553 | 0.0001427367 | 134.23 | 0.588 | 1.633  |
| 7661 | VDA | 3228 | 0.0001804755 | 115.43 | 0.506 | 0.833  |
| 7662 | VDR | 2446 | 0.0001367544 | 150.10 | 0.658 | -1.267 |
| 7663 | VDN | 1617 | 0.0000904055 | 127.00 | 0.557 | -0.933 |
| 7664 | VDD | 2405 | 0.0001344621 | 124.53 | 0.546 | -0.933 |
| 7665 | VDC | 1102 | 0.0000616122 | 119.87 | 0.525 | 1.067  |
| 7666 | VDQ | 1836 | 0.0001026497 | 135.23 | 0.593 | -0.933 |
| 7667 | VDE | 3736 | 0.0002088775 | 132.83 | 0.582 | -0.933 |
| 7668 | VDG | 3588 | 0.0002006029 | 107.07 | 0.469 | 0.100  |
| 7669 | VDH | 1163 | 0.0000650226 | 138.77 | 0.608 | -0.833 |
| 7670 | VDI | 2703 | 0.0001511231 | 140.07 | 0.614 | 1.733  |
| 7671 | VDL | 4842 | 0.0002707133 | 140.10 | 0.614 | 1.500  |
| 7672 | VDK | 2595 | 0.0001450849 | 141.20 | 0.619 | -1.067 |
| 7673 | VDM | 1116 | 0.0000623949 | 141.10 | 0.618 | 0.867  |
| 7674 | VDF | 2228 | 0.0001245661 | 149.40 | 0.655 | 1.167  |
| 7675 | VDP | 3024 | 0.0001690700 | 126.40 | 0.554 | -0.300 |
| 7676 | VDS | 3986 | 0.0002228549 | 117.23 | 0.514 | -0.033 |
| 7677 | VDT | 2546 | 0.0001423453 | 125.93 | 0.552 | 0.000  |
| 7678 | VDW | 775  | 0.0000433298 | 161.50 | 0.708 | -0.067 |
| 7679 | VDY | 1474 | 0.0000824105 | 151.10 | 0.662 | -0.200 |
| 7680 | VDV | 3691 | 0.0002063616 | 131.77 | 0.577 | 1.633  |
| 7681 | VCA | 1687 | 0.0000943192 | 110.77 | 0.485 | 2.833  |
| 7682 | VCR | 1837 | 0.0001027056 | 145.43 | 0.637 | 0.733  |
| 7683 | VCN | 1045 | 0.0000584253 | 122.33 | 0.536 | 1.067  |
| 7684 | VCD | 1362 | 0.0000761486 | 119.87 | 0.525 | 1.067  |
| 7685 | VCC | 732  | 0.0000409257 | 115.20 | 0.505 | 3.067  |
| 7686 | VCQ | 1188 | 0.0000664204 | 130.57 | 0.572 | 1.067  |
| 7687 | VCE | 1580 | 0.0000883368 | 128.17 | 0.562 | 1.067  |
| 7688 | VCG | 2386 | 0.0001333998 | 102.40 | 0.449 | 2.100  |
| 7689 | VCH | 755  | 0.0000422116 | 134.10 | 0.588 | 1.167  |
| 7690 | VCI | 1119 | 0.0000625626 | 135.40 | 0.593 | 3.733  |

|      |     |      |              |        |       |        |
|------|-----|------|--------------|--------|-------|--------|
| 7691 | VCL | 2235 | 0.0001249575 | 135.43 | 0.593 | 3.500  |
| 7692 | VCK | 1425 | 0.0000796709 | 136.53 | 0.598 | 0.933  |
| 7693 | VCM | 495  | 0.0000276752 | 136.43 | 0.598 | 2.867  |
| 7694 | VCF | 948  | 0.0000530021 | 144.73 | 0.634 | 3.167  |
| 7695 | VCP | 1383 | 0.0000773227 | 121.73 | 0.533 | 1.700  |
| 7696 | VCS | 2199 | 0.0001229448 | 112.57 | 0.493 | 1.967  |
| 7697 | VCT | 1319 | 0.0000737445 | 121.27 | 0.531 | 2.000  |
| 7698 | VCW | 353  | 0.0000197360 | 156.83 | 0.687 | 1.933  |
| 7699 | VCY | 589  | 0.0000329306 | 146.43 | 0.642 | 1.800  |
| 7700 | VCV | 1636 | 0.0000914678 | 127.10 | 0.557 | 3.633  |
| 7701 | VQA | 3888 | 0.0002173758 | 126.13 | 0.553 | 0.833  |
| 7702 | VQR | 3072 | 0.0001717537 | 160.80 | 0.705 | -1.267 |
| 7703 | VQN | 1792 | 0.0001001896 | 137.70 | 0.603 | -0.933 |
| 7704 | VQD | 2304 | 0.0001288153 | 135.23 | 0.593 | -0.933 |
| 7705 | VQC | 1071 | 0.0000598790 | 130.57 | 0.572 | 1.067  |
| 7706 | VQQ | 2623 | 0.0001466504 | 145.93 | 0.639 | -0.933 |
| 7707 | VQE | 3939 | 0.0002202271 | 143.53 | 0.629 | -0.933 |
| 7708 | VQG | 3184 | 0.0001780155 | 117.77 | 0.516 | 0.100  |
| 7709 | VQH | 1442 | 0.0000806214 | 149.47 | 0.655 | -0.833 |
| 7710 | VQI | 1876 | 0.0001048860 | 150.77 | 0.661 | 1.733  |
| 7711 | VQL | 4540 | 0.0002538287 | 150.80 | 0.661 | 1.500  |
| 7712 | VQK | 3032 | 0.0001695173 | 151.90 | 0.666 | -1.067 |
| 7713 | VQM | 891  | 0.0000498153 | 151.80 | 0.665 | 0.867  |
| 7714 | VQF | 1521 | 0.0000850382 | 160.10 | 0.702 | 1.167  |
| 7715 | VQP | 2723 | 0.0001522413 | 137.10 | 0.601 | -0.300 |
| 7716 | VQS | 2994 | 0.0001673927 | 127.93 | 0.561 | -0.033 |
| 7717 | VQT | 2471 | 0.0001381521 | 136.63 | 0.599 | 0.000  |
| 7718 | VQW | 601  | 0.0000336016 | 172.20 | 0.755 | -0.067 |
| 7719 | VQY | 1181 | 0.0000660290 | 161.80 | 0.709 | -0.200 |
| 7720 | VQV | 3171 | 0.0001772887 | 142.47 | 0.624 | 1.633  |
| 7721 | VEA | 5057 | 0.0002827338 | 123.73 | 0.542 | 0.833  |
| 7722 | VER | 3739 | 0.0002090452 | 158.40 | 0.694 | -1.267 |
| 7723 | VEN | 2990 | 0.0001671691 | 135.30 | 0.593 | -0.933 |
| 7724 | VED | 3961 | 0.0002214571 | 132.83 | 0.582 | -0.933 |
| 7725 | VEC | 1142 | 0.0000638485 | 128.17 | 0.562 | 1.067  |
| 7726 | VEQ | 2721 | 0.0001521295 | 143.53 | 0.629 | -0.933 |
| 7727 | VEE | 7037 | 0.0003934345 | 141.13 | 0.618 | -0.933 |
| 7728 | VEG | 4242 | 0.0002371677 | 115.37 | 0.506 | 0.100  |
| 7729 | VEH | 1628 | 0.0000910205 | 147.07 | 0.644 | -0.833 |
| 7730 | VEI | 2779 | 0.0001553722 | 148.37 | 0.650 | 1.733  |
| 7731 | VEL | 5559 | 0.0003108004 | 148.40 | 0.650 | 1.500  |
| 7732 | VEK | 4832 | 0.0002701542 | 149.50 | 0.655 | -1.067 |
| 7733 | VEM | 1637 | 0.0000915237 | 149.40 | 0.655 | 0.867  |
| 7734 | VEF | 2110 | 0.0001179688 | 157.70 | 0.691 | 1.167  |
| 7735 | VEP | 3028 | 0.0001692937 | 134.70 | 0.590 | -0.300 |
| 7736 | VES | 4013 | 0.0002243644 | 125.53 | 0.550 | -0.033 |
| 7737 | VET | 3327 | 0.0001860106 | 134.23 | 0.588 | 0.000  |
| 7738 | VEW | 731  | 0.0000408698 | 169.80 | 0.744 | -0.067 |
| 7739 | VEY | 1602 | 0.0000895669 | 159.40 | 0.699 | -0.200 |
| 7740 | VEV | 4822 | 0.0002695951 | 140.07 | 0.614 | 1.633  |
| 7741 | VGA | 4985 | 0.0002787084 | 97.97  | 0.429 | 1.867  |
| 7742 | VGR | 3550 | 0.0001984784 | 132.63 | 0.581 | -0.233 |

|      |     |      |              |        |       |        |
|------|-----|------|--------------|--------|-------|--------|
| 7743 | VGN | 2355 | 0.0001316666 | 109.53 | 0.480 | 0.100  |
| 7744 | VGD | 3261 | 0.0001823206 | 107.07 | 0.469 | 0.100  |
| 7745 | VGC | 1368 | 0.0000764841 | 102.40 | 0.449 | 2.100  |
| 7746 | VGQ | 2540 | 0.0001420099 | 117.77 | 0.516 | 0.100  |
| 7747 | VGE | 4033 | 0.0002254826 | 115.37 | 0.506 | 0.100  |
| 7748 | VGG | 5294 | 0.0002959844 | 89.60  | 0.393 | 1.133  |
| 7749 | VGH | 1404 | 0.0000784968 | 121.30 | 0.532 | 0.200  |
| 7750 | VGI | 2840 | 0.0001587827 | 122.60 | 0.537 | 2.767  |
| 7751 | VGL | 5765 | 0.0003223177 | 122.63 | 0.537 | 2.533  |
| 7752 | VGK | 3118 | 0.0001743255 | 123.73 | 0.542 | -0.033 |
| 7753 | VGM | 1259 | 0.0000703899 | 123.63 | 0.542 | 1.900  |
| 7754 | VGF | 2228 | 0.0001245661 | 131.93 | 0.578 | 2.200  |
| 7755 | VGP | 3617 | 0.0002022243 | 108.93 | 0.477 | 0.733  |
| 7756 | VGS | 5381 | 0.0003008485 | 99.77  | 0.437 | 1.000  |
| 7757 | VGT | 3697 | 0.0002066970 | 108.47 | 0.475 | 1.033  |
| 7758 | VGW | 815  | 0.0000455662 | 144.03 | 0.631 | 0.967  |
| 7759 | VGX | 1475 | 0.0000824664 | 133.63 | 0.586 | 0.833  |
| 7760 | VGZ | 4073 | 0.0002277190 | 114.30 | 0.501 | 2.667  |
| 7761 | VHA | 1655 | 0.0000925301 | 129.67 | 0.568 | 0.933  |
| 7762 | VHR | 1903 | 0.0001063956 | 164.33 | 0.720 | -1.167 |
| 7763 | VHN | 857  | 0.0000479144 | 141.23 | 0.619 | -0.833 |
| 7764 | VHD | 996  | 0.0000556858 | 138.77 | 0.608 | -0.833 |
| 7765 | VHC | 901  | 0.0000503744 | 134.10 | 0.588 | 1.167  |
| 7766 | VHQ | 1488 | 0.0000831932 | 149.47 | 0.655 | -0.833 |
| 7767 | VHE | 1476 | 0.0000825223 | 147.07 | 0.644 | -0.833 |
| 7768 | VHG | 1819 | 0.0001016992 | 121.30 | 0.532 | 0.200  |
| 7769 | VHH | 868  | 0.0000485294 | 153.00 | 0.670 | -0.733 |
| 7770 | VHI | 1390 | 0.0000777141 | 154.30 | 0.676 | 1.833  |
| 7771 | VHL | 2823 | 0.0001578322 | 154.33 | 0.676 | 1.600  |
| 7772 | VHK | 1448 | 0.0000809568 | 155.43 | 0.681 | -0.967 |
| 7773 | VHM | 642  | 0.0000358938 | 155.33 | 0.681 | 0.967  |
| 7774 | VHF | 1110 | 0.0000620594 | 163.63 | 0.717 | 1.267  |
| 7775 | VHP | 1688 | 0.0000943751 | 140.63 | 0.616 | -0.200 |
| 7776 | VHS | 2403 | 0.0001343503 | 131.47 | 0.576 | 0.067  |
| 7777 | VHT | 2350 | 0.0001313871 | 140.17 | 0.614 | 0.100  |
| 7778 | VHW | 375  | 0.0000209660 | 175.73 | 0.770 | 0.033  |
| 7779 | VHY | 864  | 0.0000483057 | 165.33 | 0.725 | -0.100 |
| 7780 | VHV | 1891 | 0.0001057247 | 146.00 | 0.640 | 1.733  |
| 7781 | VIA | 3246 | 0.0001814819 | 130.97 | 0.574 | 3.500  |
| 7782 | VIR | 2510 | 0.0001403326 | 165.63 | 0.726 | 1.400  |
| 7783 | VIN | 2020 | 0.0001129370 | 142.53 | 0.625 | 1.733  |
| 7784 | VID | 2518 | 0.0001407799 | 140.07 | 0.614 | 1.733  |
| 7785 | VIC | 1267 | 0.0000708372 | 135.40 | 0.593 | 3.733  |
| 7786 | VIQ | 2576 | 0.0001440226 | 150.77 | 0.661 | 1.733  |
| 7787 | VIE | 2972 | 0.0001661627 | 148.37 | 0.650 | 1.733  |
| 7788 | VIG | 3061 | 0.0001711387 | 122.60 | 0.537 | 2.767  |
| 7789 | VIH | 1554 | 0.0000868832 | 154.30 | 0.676 | 1.833  |
| 7790 | VII | 2376 | 0.0001328407 | 155.60 | 0.682 | 4.400  |
| 7791 | VIL | 4850 | 0.0002711606 | 155.63 | 0.682 | 4.167  |
| 7792 | VIK | 2692 | 0.0001505081 | 156.73 | 0.687 | 1.600  |
| 7793 | VIM | 975  | 0.0000545117 | 156.63 | 0.686 | 3.533  |
| 7794 | VIF | 2138 | 0.0001195343 | 164.93 | 0.723 | 3.833  |

|      |     |       |              |        |       |        |
|------|-----|-------|--------------|--------|-------|--------|
| 7795 | VIP | 2783  | 0.0001555959 | 141.93 | 0.622 | 2.367  |
| 7796 | VIS | 4166  | 0.0002329186 | 132.77 | 0.582 | 2.633  |
| 7797 | VIT | 2966  | 0.0001658273 | 141.47 | 0.620 | 2.667  |
| 7798 | VIW | 516   | 0.0000288493 | 177.03 | 0.776 | 2.600  |
| 7799 | VIY | 1379  | 0.0000770991 | 166.63 | 0.730 | 2.467  |
| 7800 | VIV | 3229  | 0.0001805315 | 147.30 | 0.645 | 4.300  |
| 7801 | VLA | 8004  | 0.0004474988 | 131.00 | 0.574 | 3.267  |
| 7802 | VLR | 6585  | 0.0003681634 | 165.67 | 0.726 | 1.167  |
| 7803 | VLN | 3684  | 0.0002059702 | 142.57 | 0.625 | 1.500  |
| 7804 | VLD | 5863  | 0.0003277968 | 140.10 | 0.614 | 1.500  |
| 7805 | VLC | 2410  | 0.0001347417 | 135.43 | 0.593 | 3.500  |
| 7806 | VLQ | 6421  | 0.0003589943 | 150.80 | 0.661 | 1.500  |
| 7807 | VLE | 7883  | 0.0004407338 | 148.40 | 0.650 | 1.500  |
| 7808 | VLG | 7565  | 0.0004229546 | 122.63 | 0.537 | 2.533  |
| 7809 | VLH | 2909  | 0.0001626404 | 154.33 | 0.676 | 1.600  |
| 7810 | VLI | 4108  | 0.0002296758 | 155.63 | 0.682 | 4.167  |
| 7811 | VLL | 11692 | 0.0006536927 | 155.67 | 0.682 | 3.933  |
| 7812 | VLK | 5886  | 0.0003290827 | 156.77 | 0.687 | 1.367  |
| 7813 | VLM | 2118  | 0.0001184161 | 156.67 | 0.687 | 3.300  |
| 7814 | VLF | 3701  | 0.0002069207 | 164.97 | 0.723 | 3.600  |
| 7815 | VLP | 6064  | 0.0003390346 | 141.97 | 0.622 | 2.133  |
| 7816 | VLS | 8788  | 0.0004913318 | 132.80 | 0.582 | 2.400  |
| 7817 | VLT | 5786  | 0.0003234918 | 141.50 | 0.620 | 2.433  |
| 7818 | VLW | 1258  | 0.0000703340 | 177.07 | 0.776 | 2.367  |
| 7819 | VLY | 2903  | 0.0001623050 | 166.67 | 0.730 | 2.233  |
| 7820 | VLV | 7046  | 0.0003939376 | 147.33 | 0.646 | 4.067  |
| 7821 | VKA | 4046  | 0.0002262094 | 132.10 | 0.579 | 0.700  |
| 7822 | VKR | 2997  | 0.0001675605 | 166.77 | 0.731 | -1.400 |
| 7823 | VKN | 2431  | 0.0001359157 | 143.67 | 0.630 | -1.067 |
| 7824 | VKD | 3174  | 0.0001774564 | 141.20 | 0.619 | -1.067 |
| 7825 | VKC | 1046  | 0.0000584812 | 136.53 | 0.598 | 0.933  |
| 7826 | VKQ | 2434  | 0.0001360835 | 151.90 | 0.666 | -1.067 |
| 7827 | VKE | 5238  | 0.0002928534 | 149.50 | 0.655 | -1.067 |
| 7828 | VKG | 3204  | 0.0001791337 | 123.73 | 0.542 | -0.033 |
| 7829 | VKH | 1310  | 0.0000732413 | 155.43 | 0.681 | -0.967 |
| 7830 | VKI | 2723  | 0.0001522413 | 156.73 | 0.687 | 1.600  |
| 7831 | VKL | 4656  | 0.0002603142 | 156.77 | 0.687 | 1.367  |
| 7832 | VKK | 4447  | 0.0002486291 | 157.87 | 0.692 | -1.200 |
| 7833 | VKM | 1378  | 0.0000770432 | 157.77 | 0.691 | 0.733  |
| 7834 | VKF | 1767  | 0.0000987919 | 166.07 | 0.728 | 1.033  |
| 7835 | VKP | 2948  | 0.0001648209 | 143.07 | 0.627 | -0.433 |
| 7836 | VKS | 3707  | 0.0002072561 | 133.90 | 0.587 | -0.167 |
| 7837 | VKT | 3124  | 0.0001746610 | 142.60 | 0.625 | -0.133 |
| 7838 | VKW | 691   | 0.0000386334 | 178.17 | 0.781 | -0.200 |
| 7839 | VKY | 1398  | 0.0000781613 | 167.77 | 0.735 | -0.333 |
| 7840 | VKV | 3946  | 0.0002206185 | 148.43 | 0.650 | 1.500  |
| 7841 | VMA | 1697  | 0.0000948783 | 132.00 | 0.578 | 2.633  |
| 7842 | VMR | 1066  | 0.0000595994 | 166.67 | 0.730 | 0.533  |
| 7843 | VMN | 816   | 0.0000456221 | 143.57 | 0.629 | 0.867  |
| 7844 | VMD | 1273  | 0.0000711727 | 141.10 | 0.618 | 0.867  |
| 7845 | VMC | 343   | 0.0000191769 | 136.43 | 0.598 | 2.867  |
| 7846 | VMQ | 903   | 0.0000504862 | 151.80 | 0.665 | 0.867  |

|      |     |      |              |        |       |        |
|------|-----|------|--------------|--------|-------|--------|
| 7847 | VME | 1775 | 0.0000992392 | 149.40 | 0.655 | 0.867  |
| 7848 | VMG | 1294 | 0.0000723468 | 123.63 | 0.542 | 1.900  |
| 7849 | VMH | 412  | 0.0000230347 | 155.33 | 0.681 | 0.967  |
| 7850 | VMI | 721  | 0.0000403107 | 156.63 | 0.686 | 3.533  |
| 7851 | VML | 2337 | 0.0001306603 | 156.67 | 0.687 | 3.300  |
| 7852 | VMK | 1127 | 0.0000630099 | 157.77 | 0.691 | 0.733  |
| 7853 | VMM | 506  | 0.0000282902 | 157.67 | 0.691 | 2.667  |
| 7854 | VMF | 681  | 0.0000380743 | 165.97 | 0.727 | 2.967  |
| 7855 | VMP | 1040 | 0.0000581458 | 142.97 | 0.626 | 1.500  |
| 7856 | VMS | 1347 | 0.0000753100 | 133.80 | 0.586 | 1.767  |
| 7857 | VMT | 1030 | 0.0000575867 | 142.50 | 0.624 | 1.800  |
| 7858 | VMW | 212  | 0.0000118528 | 178.07 | 0.780 | 1.733  |
| 7859 | VMY | 582  | 0.0000325393 | 167.67 | 0.735 | 1.600  |
| 7860 | VMV | 1599 | 0.0000893991 | 148.33 | 0.650 | 3.433  |
| 7861 | VFA | 2543 | 0.0001421776 | 140.30 | 0.615 | 2.933  |
| 7862 | VFR | 2291 | 0.0001280884 | 174.97 | 0.767 | 0.833  |
| 7863 | VFN | 1464 | 0.0000818514 | 151.87 | 0.665 | 1.167  |
| 7864 | VFD | 2081 | 0.0001163475 | 149.40 | 0.655 | 1.167  |
| 7865 | VFC | 987  | 0.0000551826 | 144.73 | 0.634 | 3.167  |
| 7866 | VFQ | 2078 | 0.0001161797 | 160.10 | 0.702 | 1.167  |
| 7867 | VFE | 2309 | 0.0001290948 | 157.70 | 0.691 | 1.167  |
| 7868 | VFG | 2733 | 0.0001528004 | 131.93 | 0.578 | 2.200  |
| 7869 | VFH | 1294 | 0.0000723468 | 163.63 | 0.717 | 1.267  |
| 7870 | VFI | 2026 | 0.0001132724 | 164.93 | 0.723 | 3.833  |
| 7871 | VFL | 4341 | 0.0002427027 | 164.97 | 0.723 | 3.600  |
| 7872 | VFK | 1963 | 0.0001097502 | 166.07 | 0.728 | 1.033  |
| 7873 | VFM | 795  | 0.0000444480 | 165.97 | 0.727 | 2.967  |
| 7874 | VFF | 1755 | 0.0000981210 | 174.27 | 0.764 | 3.267  |
| 7875 | VFP | 2090 | 0.0001168506 | 151.27 | 0.663 | 1.800  |
| 7876 | VFS | 3934 | 0.0002199476 | 142.10 | 0.623 | 2.067  |
| 7877 | VFT | 2451 | 0.0001370339 | 150.80 | 0.661 | 2.100  |
| 7878 | VFV | 558  | 0.0000311974 | 186.37 | 0.817 | 2.033  |
| 7879 | VFY | 1335 | 0.0000746391 | 175.97 | 0.771 | 1.900  |
| 7880 | VFV | 2810 | 0.0001571054 | 156.63 | 0.686 | 3.733  |
| 7881 | VPA | 5681 | 0.0003176213 | 117.30 | 0.514 | 1.467  |
| 7882 | VPR | 3607 | 0.0002016652 | 151.97 | 0.666 | -0.633 |
| 7883 | VPN | 1688 | 0.0000943751 | 128.87 | 0.565 | -0.300 |
| 7884 | VPD | 2919 | 0.0001631995 | 126.40 | 0.554 | -0.300 |
| 7885 | VPC | 1350 | 0.0000754777 | 121.73 | 0.533 | 1.700  |
| 7886 | VPQ | 2812 | 0.0001572172 | 137.10 | 0.601 | -0.300 |
| 7887 | VPE | 4930 | 0.0002756334 | 134.70 | 0.590 | -0.300 |
| 7888 | VPG | 6048 | 0.0003381401 | 108.93 | 0.477 | 0.733  |
| 7889 | VPH | 1326 | 0.0000741359 | 140.63 | 0.616 | -0.200 |
| 7890 | VPI | 2205 | 0.0001232802 | 141.93 | 0.622 | 2.367  |
| 7891 | VPL | 5769 | 0.0003225413 | 141.97 | 0.622 | 2.133  |
| 7892 | VPK | 2719 | 0.0001520177 | 143.07 | 0.627 | -0.433 |
| 7893 | VPM | 1109 | 0.0000620035 | 142.97 | 0.626 | 1.500  |
| 7894 | VPF | 2190 | 0.0001224416 | 151.27 | 0.663 | 1.800  |
| 7895 | VPP | 5650 | 0.0003158881 | 128.27 | 0.562 | 0.333  |
| 7896 | VPS | 6007 | 0.0003358478 | 119.10 | 0.522 | 0.600  |
| 7897 | VPT | 3417 | 0.0001910424 | 127.80 | 0.560 | 0.633  |
| 7898 | VPW | 757  | 0.0000423234 | 163.37 | 0.716 | 0.567  |



|      |     |      |              |        |       |        |
|------|-----|------|--------------|--------|-------|--------|
| 7899 | VPY | 1491 | 0.0000833609 | 152.97 | 0.670 | 0.433  |
| 7900 | VPV | 5113 | 0.0002858647 | 133.63 | 0.586 | 2.267  |
| 7901 | VSA | 6371 | 0.0003561988 | 108.13 | 0.474 | 1.733  |
| 7902 | VSR | 4692 | 0.0002623269 | 142.80 | 0.626 | -0.367 |
| 7903 | VSN | 2797 | 0.0001563786 | 119.70 | 0.525 | -0.033 |
| 7904 | VSD | 3587 | 0.0002005470 | 117.23 | 0.514 | -0.033 |
| 7905 | VSC | 2103 | 0.0001175775 | 112.57 | 0.493 | 1.967  |
| 7906 | VSQ | 3905 | 0.0002183262 | 127.93 | 0.561 | -0.033 |
| 7907 | VSE | 5648 | 0.0003157763 | 125.53 | 0.550 | -0.033 |
| 7908 | VSG | 6026 | 0.0003369100 | 99.77  | 0.437 | 1.000  |
| 7909 | VSH | 2019 | 0.0001128811 | 131.47 | 0.576 | 0.067  |
| 7910 | VSI | 3269 | 0.0001827678 | 132.77 | 0.582 | 2.633  |
| 7911 | VSL | 8223 | 0.0004597430 | 132.80 | 0.582 | 2.400  |
| 7912 | VSK | 3942 | 0.0002203949 | 133.90 | 0.587 | -0.167 |
| 7913 | VSM | 1568 | 0.0000876659 | 133.80 | 0.586 | 1.767  |
| 7914 | VSF | 3280 | 0.0001833828 | 142.10 | 0.623 | 2.067  |
| 7915 | VSP | 5497 | 0.0003073340 | 119.10 | 0.522 | 0.600  |
| 7916 | VSS | 9170 | 0.0005126892 | 109.93 | 0.482 | 0.867  |
| 7917 | VST | 4966 | 0.0002776461 | 118.63 | 0.520 | 0.900  |
| 7918 | VSW | 1517 | 0.0000848146 | 154.20 | 0.676 | 0.833  |
| 7919 | VSY | 2280 | 0.0001274734 | 143.80 | 0.630 | 0.700  |
| 7920 | VSV | 5689 | 0.0003180686 | 124.47 | 0.545 | 2.533  |
| 7921 | VTA | 4870 | 0.0002722788 | 116.83 | 0.512 | 1.767  |
| 7922 | VTR | 3140 | 0.0001755555 | 151.50 | 0.664 | -0.333 |
| 7923 | VTN | 2089 | 0.0001167947 | 128.40 | 0.563 | 0.000  |
| 7924 | VTD | 3280 | 0.0001833828 | 125.93 | 0.552 | 0.000  |
| 7925 | VTC | 1517 | 0.0000848146 | 121.27 | 0.531 | 2.000  |
| 7926 | VTQ | 2648 | 0.0001480481 | 136.63 | 0.599 | 0.000  |
| 7927 | VTE | 4488 | 0.0002509214 | 134.23 | 0.588 | 0.000  |
| 7928 | VTG | 4857 | 0.0002715520 | 108.47 | 0.475 | 1.033  |
| 7929 | VTH | 1513 | 0.0000845909 | 140.17 | 0.614 | 0.100  |
| 7930 | VTI | 3136 | 0.0001753319 | 141.47 | 0.620 | 2.667  |
| 7931 | VTL | 6712 | 0.0003752639 | 141.50 | 0.620 | 2.433  |
| 7932 | VTK | 3215 | 0.0001797487 | 142.60 | 0.625 | -0.133 |
| 7933 | VTM | 1433 | 0.0000801182 | 142.50 | 0.624 | 1.800  |
| 7934 | VTF | 2667 | 0.0001491104 | 150.80 | 0.661 | 2.100  |
| 7935 | VTP | 4142 | 0.0002315767 | 127.80 | 0.560 | 0.633  |
| 7936 | VTS | 5574 | 0.0003116390 | 118.63 | 0.520 | 0.900  |
| 7937 | VTT | 3764 | 0.0002104430 | 127.33 | 0.558 | 0.933  |
| 7938 | VTW | 999  | 0.0000558535 | 162.90 | 0.714 | 0.867  |
| 7939 | VTY | 1542 | 0.0000862123 | 152.50 | 0.668 | 0.733  |
| 7940 | VTV | 5420 | 0.0003030289 | 133.17 | 0.584 | 2.567  |
| 7941 | VWA | 910  | 0.0000508776 | 152.40 | 0.668 | 1.700  |
| 7942 | VWR | 810  | 0.0000452866 | 187.07 | 0.820 | -0.400 |
| 7943 | VWN | 653  | 0.0000365088 | 163.97 | 0.719 | -0.067 |
| 7944 | VWD | 852  | 0.0000476348 | 161.50 | 0.708 | -0.067 |
| 7945 | VWC | 234  | 0.0000130828 | 156.83 | 0.687 | 1.933  |
| 7946 | VWQ | 487  | 0.0000272279 | 172.20 | 0.755 | -0.067 |
| 7947 | VWE | 830  | 0.0000464048 | 169.80 | 0.744 | -0.067 |
| 7948 | VWG | 814  | 0.0000455103 | 144.03 | 0.631 | 0.967  |
| 7949 | VWH | 314  | 0.0000175556 | 175.73 | 0.770 | 0.033  |
| 7950 | VWI | 523  | 0.0000292406 | 177.03 | 0.776 | 2.600  |

|      |     |      |              |        |       |        |
|------|-----|------|--------------|--------|-------|--------|
| 7951 | VWL | 1277 | 0.0000713963 | 177.07 | 0.776 | 2.367  |
| 7952 | VWK | 803  | 0.0000448952 | 178.17 | 0.781 | -0.200 |
| 7953 | VWM | 262  | 0.0000146483 | 178.07 | 0.780 | 1.733  |
| 7954 | VWF | 515  | 0.0000287933 | 186.37 | 0.817 | 2.033  |
| 7955 | VWP | 509  | 0.0000284579 | 163.37 | 0.716 | 0.567  |
| 7956 | VWS | 1076 | 0.0000601585 | 154.20 | 0.676 | 0.833  |
| 7957 | VWT | 681  | 0.0000380743 | 162.90 | 0.714 | 0.867  |
| 7958 | VWW | 193  | 0.0000107905 | 198.47 | 0.870 | 0.800  |
| 7959 | VWY | 354  | 0.0000197919 | 188.07 | 0.824 | 0.667  |
| 7960 | VWV | 826  | 0.0000461812 | 168.73 | 0.739 | 2.500  |
| 7961 | VYA | 1581 | 0.0000883928 | 142.00 | 0.622 | 1.567  |
| 7962 | VYR | 1568 | 0.0000876659 | 176.67 | 0.774 | -0.533 |
| 7963 | VYN | 1167 | 0.0000652463 | 153.57 | 0.673 | -0.200 |
| 7964 | VYD | 1370 | 0.0000765959 | 151.10 | 0.662 | -0.200 |
| 7965 | VYC | 798  | 0.0000446157 | 146.43 | 0.642 | 1.800  |
| 7966 | VYQ | 1301 | 0.0000727381 | 161.80 | 0.709 | -0.200 |
| 7967 | VYE | 1713 | 0.0000957728 | 159.40 | 0.699 | -0.200 |
| 7968 | VYG | 1674 | 0.0000935923 | 133.63 | 0.586 | 0.833  |
| 7969 | VYH | 821  | 0.0000459016 | 165.33 | 0.725 | -0.100 |
| 7970 | VYI | 1745 | 0.0000975619 | 166.63 | 0.730 | 2.467  |
| 7971 | VYL | 2492 | 0.0001393262 | 166.67 | 0.730 | 2.233  |
| 7972 | VYK | 1473 | 0.0000823545 | 167.77 | 0.735 | -0.333 |
| 7973 | VYM | 579  | 0.0000323715 | 167.67 | 0.735 | 1.600  |
| 7974 | VYF | 1154 | 0.0000645194 | 175.97 | 0.771 | 1.900  |
| 7975 | VYP | 1283 | 0.0000717318 | 152.97 | 0.670 | 0.433  |
| 7976 | VYS | 2290 | 0.0001280325 | 143.80 | 0.630 | 0.700  |
| 7977 | VYT | 1939 | 0.0001084083 | 152.50 | 0.668 | 0.733  |
| 7978 | VYW | 348  | 0.0000194565 | 188.07 | 0.824 | 0.667  |
| 7979 | VYY | 918  | 0.0000513248 | 177.67 | 0.779 | 0.533  |
| 7980 | VYV | 1858 | 0.0001038797 | 158.33 | 0.694 | 2.367  |
| 7981 | VVA | 5596 | 0.0003128690 | 122.67 | 0.538 | 3.400  |
| 7982 | VVR | 3663 | 0.0002047961 | 157.33 | 0.689 | 1.300  |
| 7983 | VVN | 2408 | 0.0001346298 | 134.23 | 0.588 | 1.633  |
| 7984 | VVD | 3418 | 0.0001910983 | 131.77 | 0.577 | 1.633  |
| 7985 | VVC | 1617 | 0.0000904055 | 127.10 | 0.557 | 3.633  |
| 7986 | VVQ | 3159 | 0.0001766178 | 142.47 | 0.624 | 1.633  |
| 7987 | VVE | 4586 | 0.0002564005 | 140.07 | 0.614 | 1.633  |
| 7988 | VVG | 4731 | 0.0002645074 | 114.30 | 0.501 | 2.667  |
| 7989 | VVH | 1802 | 0.0001007487 | 146.00 | 0.640 | 1.733  |
| 7990 | VVI | 3254 | 0.0001819292 | 147.30 | 0.645 | 4.300  |
| 7991 | VVL | 7088 | 0.0003962858 | 147.33 | 0.646 | 4.067  |
| 7992 | VVK | 3661 | 0.0002046843 | 148.43 | 0.650 | 1.500  |
| 7993 | VVM | 1588 | 0.0000887841 | 148.33 | 0.650 | 3.433  |
| 7994 | VVF | 2699 | 0.0001508995 | 156.63 | 0.686 | 3.733  |
| 7995 | VVP | 3908 | 0.0002184939 | 133.63 | 0.586 | 2.267  |
| 7996 | VVS | 5608 | 0.0003135399 | 124.47 | 0.545 | 2.533  |
| 7997 | VVT | 4240 | 0.0002370559 | 133.17 | 0.584 | 2.567  |
| 7998 | VVW | 742  | 0.0000414848 | 168.73 | 0.739 | 2.500  |
| 7999 | VVY | 1693 | 0.0000946546 | 158.33 | 0.694 | 2.367  |
| 8000 | VVV | 5363 | 0.0002998421 | 139.00 | 0.609 | 4.200  |
