# Supplementary material
Source: PubMed Central journal article supplement (PMC11115621)
Supplement: 18_2010_437_MOESM9_ESM.pdf [file 18_2010_437_MOESM9_ESM.pdf]

**Table Ts3.** Analyses of the 3D structures of the cyclophilins.

| No.                            | PDB  | Res(Å) | Length | NID  | B-factor                  | Description                | Reference |
|--------------------------------|------|--------|--------|------|---------------------------|----------------------------|-----------|
| <b>Human/vertebrates</b>       |      |        |        |      |                           |                            |           |
| 1                              | 2CPL | 1.63   | 165    | 3586 | 15E,44K,81E               | hCyPA                      | 16        |
| 2                              | 1CWA | 2.10   | 165    | 3591 | 69RHGEK,144R              | hCyPA/CsA                  | 25        |
| 3                              | 1YND | 1.60   | 164    | 3519 | 13DGEP,69RHN,148RN,153SK  | hCyPA/(Sanglifehrin A)     | 52        |
| 4                              | 1ZKF | 2.55   | 165    | 3528 | 80G,81E,82K               | hCyPA/(Suc-AGPF-pNA)       | 29        |
| 5                              | 2X7K | 1.15   | 166    | 2757 | -                         | hPPIL1 (CGI-124)           | R1        |
| 6                              | 1XYH | 2.60   | 160    | 3396 | 156AN                     | hCyPJ (PPIL3)              | R2        |
| 7                              | 1CYN | 1.85   | 178    | 3704 | 7GP,51EKG,77R             | hCyPB/CsA                  | R3        |
| 8                              | 2RMC | 1.64   | 182    | 3867 | 48D,182D,184H             | mCyPC/CsA                  | R4        |
| 9                              | 2BIT | 1.71   | 164    | 3664 | 44K,68TNHNG,147SKS,150GRK | hCyPF                      | R5        |
| 10                             | 2Z6W | 0.96   | 164    | 3668 | 13NGK,144S,149S,153SK     | hCyPF/CsA                  | R6        |
| 11                             | 1MZW | 2.00   | 173    | 3756 | 50E,52RKDGVP,112M,161P    | hCyP19 (hCyPH)             | 18        |
| 12                             | 1QOI | 2.00   | 173    | 3747 | 53KD,83D                  | hCyP19                     | R7        |
| 13                             | 1ZMF | 1.88   | 162    | 3729 | 150NKP,215YGKK,239SGP     | hCyP33 (AA:137-301)        | R8        |
| 14                             | 1IIP | 2.00   | 297    | 6916 | 100GE,123A                | bCyP40 orthogonal          | R9        |
| 15                             | 1ZKC | 1.65   | 187    | 4205 | 414EDPKT,423KE            | CLD of hCyP60 (AA:271-457) | 54        |
| 16                             | 2A2N | 1.65   | 164    | 3700 | 567HST,573D               | CLD of hCyP73              | R10       |
| 17                             | 2GW2 | 1.80   | 173    | 3976 | 68V,85R,126I              | CLD of hCyP88              | R11       |
| 18                             | 2HE9 | 2.00   | 172    | 3844 | 54GKK,70NG,80E,160A       | CLD of hCyP157             | R12       |
| <b>Invertebrates/Parasites</b> |      |        |        |      |                           |                            |           |
| 1                              | 1DYW | 1.80   | 172    | 3869 | 87GEK                     | CeCyp3 (CeCyP18d)          | R13       |
| 2                              | 1E3B | 1.85   | 172    | 3839 | 87GE,111G                 | CeCyP3/(Complex-Au)        | R14       |
| 3                              | 1H0P | 1.75   | 182    | 4154 | 67P,70E,189IAVDT          | CeCyP5                     | R15       |
| 4                              | 1A58 | 1.95   | 177    | 3837 | none                      | BmCyP18                    | R16       |
| 5                              | 1C5F | 2.47   | 177    | 3858 | 51KIS                     | BmCyP18/CsA                | R17       |
| 6                              | 1Z81 | 2.80   | 186    | 4066 | 99I,156I,182L             | PyCyP23/p                  | R18       |
| 7                              | 2B71 | 2.50   | 169    | 3844 | 101GKS,105YGEY            | PyCyP18                    | R18       |
| 8                              | 1QNG | 2.10   | 170    | 3933 | 45KIGSRGKN                | PfCyP18/CsA                | R19       |
| 9                              | 2FU0 | 1.80   | 155    | 3563 | 62SGDGTG,73GN,106FFIT     | PfCyP87                    | R18       |
| 10                             | 2HAQ | 1.97   | 166    | 3376 | 50K,103GE,170NSH          | LdCyP18 (CyPA)             | R20       |
| 11                             | 2CMT | 1.50   | 164    | 3650 | 43F,73F,76VKGDGT          | SmCyP18                    | R21       |

All the X-ray files were taken from the PDB server whereas the structures were analyzed with the methods recently described [19]. The numbers of the intra-molecular distances (NID) between the AAs in  $i \geq i+2$  sequence positions and at atomic distances  $d_{ij} \leq 4.5 \text{ \AA}$  are dependent on the size of the CLD and structure resolution. In average, about 3700 inter-atomic interactions take place within 2.7-4.5 Å that contribute to the overall stability of the CLD. The residues having higher than the average flexibility (Debye/Waller B-factors) are explicitly indicated. **Abbreviations:** NID, the number of intramolecular interatomic distances calculated between the  $i \geq i+2$  AA residues (AAs) in the distance range ( $2.7 \text{ \AA} \geq d \leq 4.5 \text{ \AA}$ ); B-factor, the AAs that have a

higher flexibility than average; b, *Bos taurus*; Py, *Plasmodium yoelii*; Pf, *Plasmodium falciparum*; Ld, *Leishmania donovani*; Bm, *Brugia malayi*; Ce, *Caenorhabditis elegans*; Sm, *Schistosoma mansoni*. The chemical name of Sanglifehrin A: (3S,6S,9R,10R,11S,12S,13E,15E,18S,21S)-18-[(1E,3E,7S,8S)-9-[(2S,3R,4S,5S,6R,9S,11S)-9-ethyl-4-hydroxy-3,5,11-trimethyl-8-oxo-1-oxa-7-azaspiro[5.5]undec-2-yl]-8-hydroxy-1,7-dimethylnona-1,3-dienyl]-10,12-dihydroxy-3-(3-hydroxybenzyl)-6-isopropyl-11-methyl-9-(3-oxobutyl)-19-oxa-1,4,7,25-tetraazabicyclo[19.3.1]pentacosa-13,15-diene-2,5,8,20-tetrone.

## References

- R1. Stegmann CM, Luhrmann R, Wahl MC (2010) The crystal structure of PPIL1 bound to cyclosporine A suggests a binding mode for a linear epitope of the SKIP protein. *PLoS One* 5:e10013
- R2. Huang LL, Zhao XM, Huang CQ, Yu L, Xia ZX (2005) Structure of recombinant human cyclophilin J, a novel member of the cyclophilin family. *Acta Crystallogr D Biol Crystallogr* 61:316-321
- R3. Mikol V, Kallen J, Walkinshaw MD (1994) X-ray structure of a cyclophilin B/cyclosporin complex: comparison with cyclophilin A and delineation of its calcineurin-binding domain. *Proc Natl Acad Sci USA* 91:5183-5186
- R4. Ke H, Zhao Y, Luo F, Weissman I, Friedman J (1993) Crystal structure of murine cyclophilin C complexed with immunosuppressive drug cyclosporin A. *Proc Natl Acad Sci USA* 90:11850-11854
- R5. Schlatter D, Thoma R, Kung E, Stihle M, Muller F, Borroni E, Cesura A, Hennig M (2005) Crystal engineering yields crystals of cyclophilin D diffracting to 1.7 Å resolution. *Acta Crystallogr D Biol Crystallogr* 61:513-519
- R6. Kajitani K, Fujihashi M, Kobayashi Y, Shimizu S, Tsujimoto Y, Miki K (2008) Crystal structure of human cyclophilin D in complex with its inhibitor, cyclosporin A at 0.96-Å resolution. *Proteins* 70:1635-1639
- R7. Reidt U, Reuter K, Achsel T, Ingelfinger D, Luhrmann R, Ficner R (2000) Crystal structure of the human U4/U6 small nuclear ribonucleoprotein particle-specific SnuCyp-20, a nuclear cyclophilin. *J Biol Chem* 275:7439-7442
- R8. Wang T, Yun CH, Gu SY, Chang WR, Liang DC (2005) 1.88 Å crystal structure of the C domain of hCyp33: a novel domain of peptidyl-prolyl cis-trans isomerase. *Biochem Biophys Res Commun* 333:845-849
- R9. Taylor P, Dornan J, Carrello A, Minchin RF, Ratajczak T, Walkinshaw MD (2001) Two structures of cyclophilin 40: folding and fidelity in the TPR domains. *Structure* 9:431-438
- R10. Davis T, Walker JR, Newman EM, Mackenzie F, Butler-Cole C, Finerty PJ Jr, Weigelt J, Sundstrom M, Arrowsmith C, Edwards A, Bochkarev A, Dhe-Paganon S (2007) Structural Genomics Consortium (SGC). Crystal structure of the peptidylprolyl domain of human PPWD1 (2A2N), <http://www.rcsb.org/pdb>
- R11. Stegmann CM, Seeliger D, Sheldrick GM, de Groot BL, Wahl MC (2009) The thermodynamic influence of trapped water molecules on a protein-ligand interaction. *Angew Chem Int Ed Engl* 48:5207-5210
- R12. Davis T, Walker JR, Newman EM, Mackenzie F, Butler-Cole C, Finerty PJ Jr, Weigelt J, Sundstrom M, Arrowsmith C, Edwards A, Bochkarev A, Dhe-Paganon S (2007) Structural Genomics Consortium (SGC). Structure of the PPIase cyclophilin-type domain of the human NK-tumor recognition protein (2HE9), <http://www.rcsb.org/pdb>
- R13. Dornan J, Page AP, Taylor P, Wu S, Winter AD, Husi H, Walkinshaw MD (1999)

- R15. Picken NC, Eschenlauer S, Taylor P, Page AP, Walkinshaw MD (2002) Structural and biological characterisation of the gut-associated cyclophilin B isoforms from *Caenorhabditis elegans*. *J Mol Biol* 322:15-25
- R16. Taylor P, Page AP, Kontopidis G, Husi H, Walkinshaw MD (1998) The X-ray structure of a divergent cyclophilin from the nematode parasite *Brugia malayi*. *FEBS Lett* 425:361-366
- R17. Ellis PJ, Carlow CK, Ma D, Kuhn P (2000) Crystal structure of the complex of *Brugia malayi* cyclophilin and cyclosporin A. *Biochemistry* 39:592-598
- R18. Vedadi M, Lew J, Artz J, Amani M, Zhao Y, Dong A, Wasney GA, Gao M, Hills T, Brokx S, Qiu W, Sharma S, Diassiti A, Alam Z, Melone M, Mulichak A, Wernimont A, Bray J, Loppnau P, Plotnikova O, Newberry K, Sundararajan E, Houston S, Walker J, Tempel W, Bochkarev A, Kozieradzki I, Edwards A, Arrowsmith C, Roos D, Kain K, Hu, R (2007) Genome-scale protein expression and structural biology of *Plasmodium falciparum* and related *Apicomplexan* organisms. *Mol Biochem Parasitol* 151:100-110
- R19. Peterson MR, Hall DR, Berriman M, Nunes JA, Leonard GA, Fairlamb AH, Hunter WN (2000) The three-dimensional structure of a *Plasmodium falciparum* cyclophilin in complex with the potent anti-malarial cyclosporin A. *J Mol Biol* 298:123-133
- R20. Venugopal V, Sen B, Datta AK, Banerjee R (2007) Structure of cyclophilin from *Leishmania donovani* at 1.97 Å resolution. *Acta Crystal F63:60-64*
- R21. Gourlay LJ, Angelucci F, Baiocco P, Boumis G, Brunori M, Bellelli A, Miele AE (2007) The three-dimensional structure of two redox states of cyclophilin A from *Schistosoma mansoni*. Evidence for redox regulation of peptidyl-prolyl cis-trans isomerase activity. *J Biol Chem* 282:24851-24857
