# Supplementary material
Source: PubMed Central journal article supplement (PMC11115621)
Supplement: 18_2010_437_MOESM12_ESM.pdf [file 18_2010_437_MOESM12_ESM.pdf]

## Some output from X-ray file-geometry computing with Seqelf18 (AG-April-2010)

> Minimal and maximal distance for atomic interactions 2.70 4.00

Sigma { VDW } factor 1.000 (Seqelf18)

Codes for 1M63.pdb (CnA/CnB/hCyPA/CsA complex)

CnA ===== A \*\*\*\*\* CnB ===== B \*\*\*\*\* CyP-A ===== C \*\*\*\*\* CsA ===== D

This is step \* \* \* 1 \* \* \*

\* \* \* The PDB coordinates /users/andrzej/musca/cypx/1M63.pdb

Chain identifier (sequence) >>> |D|  
 Number of residues in IDRES(\*) 11  
 Starting from the index IDRES 1  
 Number of effective XYZ-coordinates 84

\* \* \* The PDB coordinates /users/andrzej/musca/cypx/1M63.pdb

Chain identifier (sequence) >>> |B|  
 Number of residues in IDRES(\*) 158  
 Starting from the index IDRES 12  
 Number of effective XYZ-coordinates 1262

Number of used coordinates 84 1262

|    |      |       |     |         |     |
|----|------|-------|-----|---------|-----|
| 1  | 3.86 | 1-BMT | CE  | 122-ASN | ND2 |
| 2  | 3.71 | 1-BMT | CZ  | 122-ASN | CB  |
| 3  | 3.45 | 1-BMT | CZ  | 122-ASN | ND2 |
| 4  | 3.96 | 1-BMT | CH  | 122-ASN | CB  |
| 5  | 4.00 | 1-BMT | CH  | 122-ASN | CG  |
| 6  | 3.10 | 1-BMT | CH  | 122-ASN | ND2 |
| 7  | 3.91 | 4-MLE | CD1 | 118-MET | CB  |
| 8  | 3.78 | 4-MLE | CD1 | 119-VAL | N   |
| 9  | 3.91 | 4-MLE | CD1 | 119-VAL | CA  |
| 10 | 3.88 | 4-MLE | CD1 | 119-VAL | CB  |
| 11 | 3.40 | 6-MLE | CD1 | 122-ASN | O   |
| 12 | 3.90 | 6-MLE | CD2 | 123-LEU | CG  |
| 13 | 3.79 | 6-MLE | CD2 | 123-LEU | CD1 |

<.....> Number of potential hydrogen bonds 0

| AA-residue-### | Contacts |
|----------------|----------|
| BMT----- 1     | 5        |
| MLE----- 4     | 5        |
| MLE----- 6     | 4        |

>>>> Inter-molecular distances 13 Below 4-A 13

>>> Hydrophobic 6 Hydrophilic 0 Mixed 7

>> Main-chain/Main-chain 0 Side-chain/Side-chain 7 Mixed 6

This is step \* \* \* 2 \* \* \*

\* \* \* The PDB coordinates /users/andrzej/musca/cypx/1M63.pdb

Chain identifier (sequence) >>> |D|  
 Number of residues in IDRES(\*) 11  
 Starting from the index IDRES 1  
 Number of effective XYZ-coordinates 84

\* \* \* The PDB coordinates /users/andrzej/musca/cypx/1M63.pdb

Chain identifier (sequence) >>> |A|  
 Number of residues in IDRES(\*) 372  
 Starting from the index IDRES 1

Number of effective XYZ-coordinates 3013

Number of used coordinates 84 3013

|    |        |       |     |         |     |
|----|--------|-------|-----|---------|-----|
| 1  | 3.78   | 2-ABA | O   | 356-PHE | CE1 |
| 2  | 3.46   | 3-SAR | CA  | 356-PHE | CD1 |
| 3  | 3.85   | 3-SAR | CA  | 356-PHE | CE1 |
| 4  | 3.94   | 3-SAR | C   | 356-PHE | CD1 |
| 5  | 3.76   | 4-MLE | CA  | 352-TRP | NE1 |
| 6  | 3.80   | 4-MLE | CB  | 352-TRP | NE1 |
| 7  | 3.92   | 4-MLE | CB  | 352-TRP | CE2 |
| 8  | 3.90   | 4-MLE | CB  | 352-TRP | CZ2 |
| 9  | 3.97   | 4-MLE | CG  | 356-PHE | CD2 |
| 10 | 3.99   | 4-MLE | CD1 | 352-TRP | CZ2 |
| 11 | 3.26   | 4-MLE | CD2 | 352-TRP | O   |
| 12 | 3.98   | 4-MLE | CD2 | 352-TRP | CD2 |
| 13 | 3.87   | 4-MLE | CD2 | 352-TRP | CE2 |
| 14 | 3.95   | 4-MLE | CD2 | 353-SER | CA  |
| 15 | 3.91   | 4-MLE | CD2 | 356-PHE | CB  |
| 16 | 3.66   | 4-MLE | C   | 352-TRP | NE1 |
| 17 | 3.60   | 5-VAL | N   | 352-TRP | NE1 |
| 18 | 3.76   | 5-VAL | C   | 352-TRP | NE1 |
| 19 | 3.71   | 5-VAL | O   | 344-PRO | CG  |
| 20 | 3.73   | 5-VAL | O   | 344-PRO | CD  |
| 21 | 3.37   | 5-VAL | O   | 352-TRP | CD1 |
| 22 | 2.84 * | 5-VAL | O   | 352-TRP | NE1 |
| 23 | 3.92   | 6-MLE | CA  | 341-TYR | OH  |
| 24 | 3.36   | 6-MLE | CB  | 341-TYR | OH  |
| 25 | 3.59   | 6-MLE | CD2 | 352-TRP | CZ2 |
| 26 | 3.90   | 6-MLE | C   | 341-TYR | OH  |
| 27 | 3.67   | 6-MLE | C   | 344-PRO | CD  |
| 28 | 3.68   | 6-MLE | O   | 344-PRO | CG  |
| 29 | 3.70   | 6-MLE | O   | 344-PRO | CD  |
| 30 | 3.86   | 7-ALA | N   | 341-TYR | CZ  |
| 31 | 2.99   | 7-ALA | N   | 341-TYR | OH  |
| 32 | 3.85   | 7-ALA | N   | 344-PRO | CD  |
| 33 | 3.80   | 7-ALA | CA  | 341-TYR | OH  |
| 34 | 3.71   | 7-ALA | CB  | 341-TYR | CZ  |
| 35 | 3.61   | 7-ALA | CB  | 341-TYR | OH  |
| 36 | 3.50   | 7-ALA | CB  | 342-TRP | O   |
| 37 | 3.99   | 8-DAL | CA  | 312-LEU | O   |
| 38 | 3.56   | 8-DAL | CB  | 312-LEU | O   |
| 39 | 3.75   | 9-MLE | CN  | 312-LEU | O   |
| 40 | 3.95   | 9-MLE | CD1 | 312-LEU | CD2 |

<.....> Number of potential hydrogen bonds 1

| AA-residue-### | Contacts |
|----------------|----------|
| ABA-----       | 2 1      |
| SAR-----       | 3 3      |
| MLE-----       | 4 13     |
| VAL-----       | 5 7      |
| MLE-----       | 6 8      |
| ALA-----       | 7 8      |
| DAL-----       | 8 3      |
| MLE-----       | 9 3      |

>>>> Inter-molecular distances 40 Below 4-A 40  
 >>> Hydrophobic 15 Hydrophilic 3 Mixed 22  
 >> Main-chain/Main-chain 1 Side-chain/Side-chain 13 Mixed 26

**This is step \* \* \* 3 \* \* \***

```

* * * The PDB coordinates /users/andrzej/musca/cypx/1M63.pdb
Chain identifier (sequence) >>> |D|
Number of residues in IDRES(*)    11
Starting from the index IDRES    1
Number of effective XYZ-coordinates    84

```

```

* * * The PDB coordinates /users/andrzej/musca/cypx/1M63.pdb
Chain identifier (sequence) >>> |C|
Number of residues in IDRES(*)    165
Starting from the index IDRES    1
Number of effective XYZ-coordinates    1265

```

```
Number of used coordinates    84 1265
```

|    |        |        |     |         |     |
|----|--------|--------|-----|---------|-----|
| 1  | 3.86   | 1-BMT  | CN  | 55-ARG  | CZ  |
| 2  | 3.65   | 1-BMT  | CN  | 55-ARG  | NH2 |
| 3  | 3.91   | 1-BMT  | CN  | 63-GLN  | NE2 |
| 4  | 3.13   | 1-BMT  | CA  | 102-ASN | O   |
| 5  | 3.36   | 1-BMT  | C   | 102-ASN | O   |
| 6  | 3.67   | 1-BMT  | O   | 63-GLN  | OE1 |
| 7  | 3.65   | 1-BMT  | O   | 63-GLN  | NE2 |
| 8  | 3.51   | 1-BMT  | CB  | 102-ASN | O   |
| 9  | 3.51   | 1-BMT  | CD1 | 102-ASN | O   |
| 10 | 3.45   | 1-BMT  | CD1 | 102-ASN | OD1 |
| 11 | 3.86   | 2-ABA  | N   | 102-ASN | C   |
| 12 | 2.78 * | 2-ABA  | N   | 102-ASN | O   |
| 13 | 3.30   | 2-ABA  | CA  | 72-GLY  | O   |
| 14 | 3.77   | 2-ABA  | CA  | 102-ASN | O   |
| 15 | 3.20   | 2-ABA  | C   | 72-GLY  | O   |
| 16 | 3.67   | 2-ABA  | O   | 72-GLY  | O   |
| 17 | 3.57   | 2-ABA  | CB  | 72-GLY  | O   |
| 18 | 3.62   | 2-ABA  | CB  | 102-ASN | O   |
| 19 | 3.93   | 2-ABA  | CB  | 111-GLN | CD  |
| 20 | 3.34   | 2-ABA  | CB  | 111-GLN | NE2 |
| 21 | 3.71   | 2-ABA  | CG  | 101-ALA | C   |
| 22 | 3.66   | 2-ABA  | CG  | 101-ALA | O   |
| 23 | 3.75   | 2-ABA  | CG  | 101-ALA | CB  |
| 24 | 3.85   | 2-ABA  | CG  | 102-ASN | N   |
| 25 | 3.87   | 2-ABA  | CG  | 102-ASN | C   |
| 26 | 3.41   | 2-ABA  | CG  | 102-ASN | O   |
| 27 | 3.89   | 2-ABA  | CG  | 111-GLN | CB  |
| 28 | 3.62   | 2-ABA  | CG  | 111-GLN | CD  |
| 29 | 3.80   | 2-ABA  | CG  | 111-GLN | OE1 |
| 30 | 3.49   | 2-ABA  | CG  | 111-GLN | NE2 |
| 31 | 3.39   | 3-SAR  | N   | 72-GLY  | O   |
| 32 | 3.72   | 3-SAR  | CN  | 72-GLY  | C   |
| 33 | 3.35   | 3-SAR  | CN  | 72-GLY  | O   |
| 34 | 3.80   | 5-VAL  | CG1 | 55-ARG  | NH1 |
| 35 | 3.28   | 8-DAL  | O   | 148-ARG | NH2 |
| 36 | 3.96   | 9-MLE  | CB  | 121-TRP | NE1 |
| 37 | 3.49   | 9-MLE  | CD1 | 148-ARG | NH2 |
| 38 | 3.53   | 9-MLE  | CD2 | 121-TRP | CZ2 |
| 39 | 3.84   | 9-MLE  | C   | 60-PHE  | CE2 |
| 40 | 3.58   | 9-MLE  | C   | 60-PHE  | CZ  |
| 41 | 3.80   | 9-MLE  | O   | 60-PHE  | CE1 |
| 42 | 3.96   | 9-MLE  | O   | 60-PHE  | CE2 |
| 43 | 3.25   | 9-MLE  | O   | 60-PHE  | CZ  |
| 44 | 3.79   | 9-MLE  | O   | 121-TRP | CD1 |
| 45 | 3.15 * | 9-MLE  | O   | 121-TRP | NE1 |
| 46 | 3.61   | 10-MLE | CN  | 55-ARG  | NH1 |
| 47 | 3.36   | 10-MLE | O   | 55-ARG  | CZ  |
| 48 | 2.81   | 10-MLE | O   | 55-ARG  | NH1 |
| 49 | 3.10 * | 10-MLE | O   | 55-ARG  | NH2 |

|    |      |        |     |         |     |
|----|------|--------|-----|---------|-----|
| 50 | 3.79 | 10-MLE | O   | 60-PHE  | CE2 |
| 51 | 3.70 | 11-MVA | CN  | 122-LEU | CD2 |
| 52 | 3.65 | 11-MVA | CN  | 126-HIS | CE1 |
| 53 | 3.26 | 11-MVA | CN  | 126-HIS | NE2 |
| 54 | 3.92 | 11-MVA | CA  | 55-ARG  | NH2 |
| 55 | 3.88 | 11-MVA | CA  | 63-GLN  | NE2 |
| 56 | 3.95 | 11-MVA | CB  | 63-GLN  | NE2 |
| 57 | 3.86 | 11-MVA | CB  | 113-PHE | CD1 |
| 58 | 3.95 | 11-MVA | CG1 | 63-GLN  | CD  |
| 59 | 2.92 | 11-MVA | CG1 | 63-GLN  | NE2 |
| 60 | 3.75 | 11-MVA | CG1 | 101-ALA | CB  |
| 61 | 3.89 | 11-MVA | CG1 | 113-PHE | CB  |
| 62 | 3.79 | 11-MVA | CG1 | 113-PHE | CG  |
| 63 | 3.41 | 11-MVA | CG1 | 113-PHE | CD1 |
| 64 | 3.68 | 11-MVA | CG2 | 60-PHE  | CZ  |
| 65 | 3.78 | 11-MVA | CG2 | 113-PHE | CG  |
| 66 | 3.86 | 11-MVA | CG2 | 113-PHE | CD1 |
| 67 | 3.89 | 11-MVA | CG2 | 113-PHE | CD2 |
| 68 | 3.98 | 11-MVA | C   | 63-GLN  | NE2 |

<.....> Number of potential hydrogen bonds 3

| AA-residue-### | Contacts |
|----------------|----------|
| BMT----- 1     | 9        |
| ABA----- 2     | 21       |
| SAR----- 3     | 4        |
| VAL----- 5     | 2        |
| DAL----- 8     | 2        |
| MLE----- 9     | 11       |
| MLE----- 10    | 6        |
| MVA----- 11    | 19       |

>>>> Inter-molecular distances 68 Below 4-A 68  
 >>> Hydrophobic 19 Hydrophilic 9 Mixed 40  
 >> Main-chain/Main-chain 9 Side-chain/Side-chain 24 Mixed 35

**This is step \* \* \* 4 \* \* \***

\* \* \* The PDB coordinates /users/andrzej/musca/cypx/1M63.pdb  
 Chain identifier (sequence) >>> |C|  
 Number of residues in IDRES(\*) 165  
 Starting from the index IDRES 1  
 Number of effective XYZ-coordinates 1265

\* \* \* The PDB coordinates /users/andrzej/musca/cypx/1M63.pdb  
 Chain identifier (sequence) >>> |D|  
 Number of residues in IDRES(\*) 11  
 Starting from the index IDRES 1  
 Number of effective XYZ-coordinates 84

Number of used coordinates 1265 84

|    |        |        |     |        |     |
|----|--------|--------|-----|--------|-----|
| 1  | 3.86   | 55-ARG | CZ  | 1-BMT  | CN  |
| 2  | 3.36   | 55-ARG | CZ  | 10-MLE | O   |
| 3  | 3.80   | 55-ARG | NH1 | 5-VAL  | CG1 |
| 4  | 3.61   | 55-ARG | NH1 | 10-MLE | CN  |
| 5  | 2.81   | 55-ARG | NH1 | 10-MLE | O   |
| 6  | 3.65   | 55-ARG | NH2 | 1-BMT  | CN  |
| 7  | 3.10 * | 55-ARG | NH2 | 10-MLE | O   |
| 8  | 3.92   | 55-ARG | NH2 | 11-MVA | CA  |
| 9  | 3.80   | 60-PHE | CE1 | 9-MLE  | O   |
| 10 | 3.84   | 60-PHE | CE2 | 9-MLE  | C   |
| 11 | 3.96   | 60-PHE | CE2 | 9-MLE  | O   |

|    |        |         |     |        |     |
|----|--------|---------|-----|--------|-----|
| 12 | 3.79   | 60-PHE  | CE2 | 10-MLE | O   |
| 13 | 3.58   | 60-PHE  | CZ  | 9-MLE  | C   |
| 14 | 3.25   | 60-PHE  | CZ  | 9-MLE  | O   |
| 15 | 3.68   | 60-PHE  | CZ  | 11-MVA | CG2 |
| 16 | 3.95   | 63-GLN  | CD  | 11-MVA | CG1 |
| 17 | 3.67   | 63-GLN  | OE1 | 1-BMT  | O   |
| 18 | 3.91   | 63-GLN  | NE2 | 1-BMT  | CN  |
| 19 | 3.65   | 63-GLN  | NE2 | 1-BMT  | O   |
| 20 | 3.88   | 63-GLN  | NE2 | 11-MVA | CA  |
| 21 | 3.95   | 63-GLN  | NE2 | 11-MVA | CB  |
| 22 | 2.92   | 63-GLN  | NE2 | 11-MVA | CG1 |
| 23 | 3.98   | 63-GLN  | NE2 | 11-MVA | C   |
| 24 | 3.72   | 72-GLY  | C   | 3-SAR  | CN  |
| 25 | 3.30   | 72-GLY  | O   | 2-ABA  | CA  |
| 26 | 3.20   | 72-GLY  | O   | 2-ABA  | C   |
| 27 | 3.67   | 72-GLY  | O   | 2-ABA  | O   |
| 28 | 3.57   | 72-GLY  | O   | 2-ABA  | CB  |
| 29 | 3.39   | 72-GLY  | O   | 3-SAR  | N   |
| 30 | 3.35   | 72-GLY  | O   | 3-SAR  | CN  |
| 31 | 3.71   | 101-ALA | C   | 2-ABA  | CG  |
| 32 | 3.66   | 101-ALA | O   | 2-ABA  | CG  |
| 33 | 3.75   | 101-ALA | CB  | 2-ABA  | CG  |
| 34 | 3.75   | 101-ALA | CB  | 11-MVA | CG1 |
| 35 | 3.85   | 102-ASN | N   | 2-ABA  | CG  |
| 36 | 3.86   | 102-ASN | C   | 2-ABA  | N   |
| 37 | 3.87   | 102-ASN | C   | 2-ABA  | CG  |
| 38 | 3.13   | 102-ASN | O   | 1-BMT  | CA  |
| 39 | 3.36   | 102-ASN | O   | 1-BMT  | C   |
| 40 | 3.51   | 102-ASN | O   | 1-BMT  | CB  |
| 41 | 3.51   | 102-ASN | O   | 1-BMT  | CD1 |
| 42 | 2.78 * | 102-ASN | O   | 2-ABA  | N   |
| 43 | 3.77   | 102-ASN | O   | 2-ABA  | CA  |
| 44 | 3.62   | 102-ASN | O   | 2-ABA  | CB  |
| 45 | 3.41   | 102-ASN | O   | 2-ABA  | CG  |
| 46 | 3.45   | 102-ASN | OD1 | 1-BMT  | CD1 |
| 47 | 3.89   | 111-GLN | CB  | 2-ABA  | CG  |
| 48 | 3.93   | 111-GLN | CD  | 2-ABA  | CB  |
| 49 | 3.62   | 111-GLN | CD  | 2-ABA  | CG  |
| 50 | 3.80   | 111-GLN | OE1 | 2-ABA  | CG  |
| 51 | 3.34   | 111-GLN | NE2 | 2-ABA  | CB  |
| 52 | 3.49   | 111-GLN | NE2 | 2-ABA  | CG  |
| 53 | 3.89   | 113-PHE | CB  | 11-MVA | CG1 |
| 54 | 3.79   | 113-PHE | CG  | 11-MVA | CG1 |
| 55 | 3.78   | 113-PHE | CG  | 11-MVA | CG2 |
| 56 | 3.86   | 113-PHE | CD1 | 11-MVA | CB  |
| 57 | 3.41   | 113-PHE | CD1 | 11-MVA | CG1 |
| 58 | 3.86   | 113-PHE | CD1 | 11-MVA | CG2 |
| 59 | 3.89   | 113-PHE | CD2 | 11-MVA | CG2 |
| 60 | 3.79   | 121-TRP | CD1 | 9-MLE  | O   |
| 61 | 3.96   | 121-TRP | NE1 | 9-MLE  | CB  |
| 62 | 3.15 * | 121-TRP | NE1 | 9-MLE  | O   |
| 63 | 3.53   | 121-TRP | CZ2 | 9-MLE  | CD2 |
| 64 | 3.70   | 122-LEU | CD2 | 11-MVA | CN  |
| 65 | 3.65   | 126-HIS | CE1 | 11-MVA | CN  |
| 66 | 3.26   | 126-HIS | NE2 | 11-MVA | CN  |
| 67 | 3.28   | 148-ARG | NH2 | 8-DAL  | O   |
| 68 | 3.49   | 148-ARG | NH2 | 9-MLE  | CD1 |

<.....> Number of potential hydrogen bonds 3

| AA-residue-### | Contacts |
|----------------|----------|
| ARG----- 55    | 7        |
| PHE----- 60    | 8        |

```

GLN----- 63          9
GLY----- 72          8
ALA-----101         5
ASN-----102        13
GLN-----111         7
PHE-----113         8
TRP-----121         5
LEU-----122         2
HIS-----126         3
ARG-----148         3

```

```

>>>> Inter-molecular distances 68 Below 4-A 68
>>> Hydrophobic 19 Hydrophilic 9 Mixed 40
>> Main-chain/Main-chain 9 Side-chain/Side-chain 24 Mixed 35

```

**This is step \* \* \* 5 \* \* \***

```

* * * The PDB coordinates /users/andrzej/musca/cypx/1M63.pdb
Chain identifier (sequence) >>> |A|
Number of residues in IDRES(*) 372
Starting from the index IDRES 1
Number of effective XYZ-coordinates 3013

```

```

* * * The PDB coordinates /users/andrzej/musca/cypx/1M63.pdb
Chain identifier (sequence) >>> |D|
Number of residues in IDRES(*) 11
Starting from the index IDRES 1
Number of effective XYZ-coordinates 84

```

Number of used coordinates 3013 84

|    |        |         |     |       |     |
|----|--------|---------|-----|-------|-----|
| 1  | 3.99   | 312-LEU | O   | 8-DAL | CA  |
| 2  | 3.56   | 312-LEU | O   | 8-DAL | CB  |
| 3  | 3.75   | 312-LEU | O   | 9-MLE | CN  |
| 4  | 3.95   | 312-LEU | CD2 | 9-MLE | CD1 |
| 5  | 3.86   | 341-TYR | CZ  | 7-ALA | N   |
| 6  | 3.71   | 341-TYR | CZ  | 7-ALA | CB  |
| 7  | 3.92   | 341-TYR | OH  | 6-MLE | CA  |
| 8  | 3.36   | 341-TYR | OH  | 6-MLE | CB  |
| 9  | 3.90   | 341-TYR | OH  | 6-MLE | C   |
| 10 | 2.99   | 341-TYR | OH  | 7-ALA | N   |
| 11 | 3.80   | 341-TYR | OH  | 7-ALA | CA  |
| 12 | 3.61   | 341-TYR | OH  | 7-ALA | CB  |
| 13 | 3.50   | 342-TRP | O   | 7-ALA | CB  |
| 14 | 3.71   | 344-PRO | CG  | 5-VAL | O   |
| 15 | 3.68   | 344-PRO | CG  | 6-MLE | O   |
| 16 | 3.73   | 344-PRO | CD  | 5-VAL | O   |
| 17 | 3.67   | 344-PRO | CD  | 6-MLE | C   |
| 18 | 3.70   | 344-PRO | CD  | 6-MLE | O   |
| 19 | 3.85   | 344-PRO | CD  | 7-ALA | N   |
| 20 | 3.26   | 352-TRP | O   | 4-MLE | CD2 |
| 21 | 3.37   | 352-TRP | CD1 | 5-VAL | O   |
| 22 | 3.98   | 352-TRP | CD2 | 4-MLE | CD2 |
| 23 | 3.76   | 352-TRP | NE1 | 4-MLE | CA  |
| 24 | 3.80   | 352-TRP | NE1 | 4-MLE | CB  |
| 25 | 3.66   | 352-TRP | NE1 | 4-MLE | C   |
| 26 | 3.60   | 352-TRP | NE1 | 5-VAL | N   |
| 27 | 3.76   | 352-TRP | NE1 | 5-VAL | C   |
| 28 | 2.84 * | 352-TRP | NE1 | 5-VAL | O   |
| 29 | 3.92   | 352-TRP | CE2 | 4-MLE | CB  |
| 30 | 3.87   | 352-TRP | CE2 | 4-MLE | CD2 |
| 31 | 3.90   | 352-TRP | CZ2 | 4-MLE | CB  |
| 32 | 3.99   | 352-TRP | CZ2 | 4-MLE | CD1 |

|    |      |         |     |       |     |
|----|------|---------|-----|-------|-----|
| 33 | 3.59 | 352-TRP | CZ2 | 6-MLE | CD2 |
| 34 | 3.95 | 353-SER | CA  | 4-MLE | CD2 |
| 35 | 3.91 | 356-PHE | CB  | 4-MLE | CD2 |
| 36 | 3.46 | 356-PHE | CD1 | 3-SAR | CA  |
| 37 | 3.94 | 356-PHE | CD1 | 3-SAR | C   |
| 38 | 3.97 | 356-PHE | CD2 | 4-MLE | CG  |
| 39 | 3.78 | 356-PHE | CE1 | 2-ABA | O   |
| 40 | 3.85 | 356-PHE | CE1 | 3-SAR | CA  |

<.....> Number of potential hydrogen bonds 1

| AA-residue-### | Contacts |
|----------------|----------|
| LEU-----312    | 3        |
| TYR-----341    | 9        |
| TRP-----342    | 2        |
| PRO-----344    | 7        |
| TRP-----352    | 15       |
| SER-----353    | 2        |
| PHE-----356    | 7        |

>>>> Inter-molecular distances 40 Below 4-A 40  
 >>> Hydrophobic 15 Hydrophilic 3 Mixed 22  
 >> Main-chain/Main-chain 1 Side-chain/Side-chain 13 Mixed 26

**This is step \* \* \* 7 \* \* \***

> Minimal and maximal distance for atomic interactions 2.70 4.00

Sigma { VDW } factor 1.000

\* \* \* The PDB coordinates /users/andrzej/musca/cypx/1M63.pdb  
 Chain identifier (sequence) >>> |B|  
 Number of residues in IDRES(\*) 158  
 Starting from the index IDRES 12  
 Number of effective XYZ-coordinates 1262

\* \* \* The PDB coordinates /users/andrzej/musca/cypx/1M63.pdb  
 Chain identifier (sequence) >>> |D|  
 Number of residues in IDRES(\*) 11  
 Starting from the index IDRES 1  
 Number of effective XYZ-coordinates 84

Number of used coordinates 1262 84

|    |      |         |     |       |     |
|----|------|---------|-----|-------|-----|
| 1  | 3.91 | 118-MET | CB  | 4-MLE | CD1 |
| 2  | 3.78 | 119-VAL | N   | 4-MLE | CD1 |
| 3  | 3.91 | 119-VAL | CA  | 4-MLE | CD1 |
| 4  | 3.88 | 119-VAL | CB  | 4-MLE | CD1 |
| 5  | 3.40 | 122-ASN | O   | 6-MLE | CD1 |
| 6  | 3.71 | 122-ASN | CB  | 1-BMT | CZ  |
| 7  | 3.96 | 122-ASN | CB  | 1-BMT | CH  |
| 8  | 4.00 | 122-ASN | CG  | 1-BMT | CH  |
| 9  | 3.86 | 122-ASN | ND2 | 1-BMT | CE  |
| 10 | 3.45 | 122-ASN | ND2 | 1-BMT | CZ  |
| 11 | 3.10 | 122-ASN | ND2 | 1-BMT | CH  |
| 12 | 3.90 | 123-LEU | CG  | 6-MLE | CD2 |
| 13 | 3.79 | 123-LEU | CD1 | 6-MLE | CD2 |

<.....> Number of potential hydrogen bonds 0

| AA-residue-### | Contacts |
|----------------|----------|
| MET-----118    | 1        |

```

VAL-----119      3
ASN-----122      8
LEU-----123      3

```

```

>>>> Inter-molecular distances 13 Below 4-A 13
>>> Hydrophobic      6 Hydrophilic      0 Mixed      7
>> Main-chain/Main-chain      0 Side-chain/Side-chain      7 Mixed      6

```

This is step \* \* \* 8 \* \* \*

```

* * * The PDB coordinates /users/andrzej/musca/cypx/1M63.pdb
Chain identifier (sequence) >>> |A|
Number of residues in IDRES(*)      372
Starting from the index IDRES      1
Number of effective XYZ-coordinates 3013

```

```

* * * The PDB coordinates /users/andrzej/musca/cypx/1M63.pdb
Chain identifier (sequence) >>> |C|
Number of residues in IDRES(*)      165
Starting from the index IDRES      1
Number of effective XYZ-coordinates 1265

```

Number of used coordinates 3013 1265

|    |      |         |     |         |     |
|----|------|---------|-----|---------|-----|
| 1  | 3.82 | 159-TYR | O   | 148-ARG | CB  |
| 2  | 3.93 | 159-TYR | CE1 | 148-ARG | CB  |
| 3  | 3.91 | 159-TYR | CZ  | 147-SER | C   |
| 4  | 3.66 | 159-TYR | CZ  | 148-ARG | N   |
| 5  | 3.87 | 159-TYR | OH  | 58-PRO  | CG  |
| 6  | 3.64 | 159-TYR | OH  | 58-PRO  | CD  |
| 7  | 3.56 | 159-TYR | OH  | 147-SER | CA  |
| 8  | 3.25 | 159-TYR | OH  | 147-SER | C   |
| 9  | 3.62 | 159-TYR | OH  | 147-SER | O   |
| 10 | 3.40 | 159-TYR | OH  | 148-ARG | N   |
| 11 | 4.00 | 159-TYR | OH  | 148-ARG | CA  |
| 12 | 3.99 | 160-PHE | CD1 | 148-ARG | CD  |
| 13 | 3.85 | 314-VAL | CG1 | 121-TRP | CG  |
| 14 | 3.55 | 314-VAL | CG1 | 121-TRP | CD2 |
| 15 | 3.75 | 314-VAL | CG1 | 121-TRP | CE2 |
| 16 | 3.85 | 314-VAL | CG1 | 121-TRP | CE3 |
| 17 | 3.45 | 314-VAL | CG2 | 121-TRP | CB  |
| 18 | 3.45 | 314-VAL | CG2 | 121-TRP | CG  |
| 19 | 3.70 | 314-VAL | CG2 | 121-TRP | CD1 |
| 20 | 3.88 | 315-TYR | CE1 | 121-TRP | CZ3 |
| 21 | 3.82 | 315-TYR | CE1 | 121-TRP | CH2 |
| 22 | 3.68 | 355-PRO | C   | 73-THR  | CG2 |
| 23 | 3.53 | 355-PRO | O   | 73-THR  | CG2 |
| 24 | 3.87 | 355-PRO | CB  | 73-THR  | CG2 |
| 25 | 3.97 | 356-PHE | N   | 73-THR  | CG2 |
| 26 | 3.73 | 359-GLU | CG  | 73-THR  | O   |
| 27 | 3.02 | 359-GLU | OE2 | 69-ARG  | CG  |
| 28 | 3.79 | 359-GLU | OE2 | 69-ARG  | CD  |
| 29 | 3.41 | 359-GLU | OE2 | 69-ARG  | NE  |
| 30 | 3.90 | 362-THR | CB  | 69-ARG  | NH1 |
| 31 | 3.31 | 362-THR | CG2 | 69-ARG  | NH1 |

<.....> Number of potential hydrogen bonds 0

| AA-residue-### | Contacts |
|----------------|----------|
| TYR-----159    | 10       |
| PHE-----160    | 2        |
| VAL-----314    | 8        |
| TYR-----315    | 3        |



```

PRO-----355      4
PHE-----356      2
GLU-----359      5
THR-----362      3

```

```

>>>> Inter-molecular distances 31 Below 4-A 31
>>> Hydrophobic 14 Hydrophilic 3 Mixed 14
>> Main-chain/Main-chain 0 Side-chain/Side-chain 19 Mixed 12

```

This is step \* \* \* 9 \* \* \*

```

* * * The PDB coordinates /users/andrzej/musca/cypx/1M63.pdb
Chain identifier (sequence) >>> |C|
Number of residues in IDRES(*) 165
Starting from the index IDRES 1
Number of effective XYZ-coordinates 1265

```

```

* * * The PDB coordinates /users/andrzej/musca/cypx/1M63.pdb
Chain identifier (sequence) >>> |A|
Number of residues in IDRES(*) 372
Starting from the index IDRES 1
Number of effective XYZ-coordinates 3013

```

Number of used coordinates 1265 3013

|    |      |         |     |         |     |
|----|------|---------|-----|---------|-----|
| 1  | 3.87 | 58-PRO  | CG  | 159-TYR | OH  |
| 2  | 3.64 | 58-PRO  | CD  | 159-TYR | OH  |
| 3  | 3.02 | 69-ARG  | CG  | 359-GLU | OE2 |
| 4  | 3.79 | 69-ARG  | CD  | 359-GLU | OE2 |
| 5  | 3.41 | 69-ARG  | NE  | 359-GLU | OE2 |
| 6  | 3.90 | 69-ARG  | NH1 | 362-THR | CB  |
| 7  | 3.31 | 69-ARG  | NH1 | 362-THR | CG2 |
| 8  | 3.73 | 73-THR  | O   | 359-GLU | CG  |
| 9  | 3.68 | 73-THR  | CG2 | 355-PRO | C   |
| 10 | 3.53 | 73-THR  | CG2 | 355-PRO | O   |
| 11 | 3.87 | 73-THR  | CG2 | 355-PRO | CB  |
| 12 | 3.97 | 73-THR  | CG2 | 356-PHE | N   |
| 13 | 3.45 | 121-TRP | CB  | 314-VAL | CG2 |
| 14 | 3.85 | 121-TRP | CG  | 314-VAL | CG1 |
| 15 | 3.45 | 121-TRP | CG  | 314-VAL | CG2 |
| 16 | 3.70 | 121-TRP | CD1 | 314-VAL | CG2 |
| 17 | 3.55 | 121-TRP | CD2 | 314-VAL | CG1 |
| 18 | 3.75 | 121-TRP | CE2 | 314-VAL | CG1 |
| 19 | 3.85 | 121-TRP | CE3 | 314-VAL | CG1 |
| 20 | 3.88 | 121-TRP | CZ3 | 315-TYR | CE1 |
| 21 | 3.82 | 121-TRP | CH2 | 315-TYR | CE1 |
| 22 | 3.56 | 147-SER | CA  | 159-TYR | OH  |
| 23 | 3.91 | 147-SER | C   | 159-TYR | CZ  |
| 24 | 3.25 | 147-SER | C   | 159-TYR | OH  |
| 25 | 3.62 | 147-SER | O   | 159-TYR | OH  |
| 26 | 3.66 | 148-ARG | N   | 159-TYR | CZ  |
| 27 | 3.40 | 148-ARG | N   | 159-TYR | OH  |
| 28 | 4.00 | 148-ARG | CA  | 159-TYR | OH  |
| 29 | 3.82 | 148-ARG | CB  | 159-TYR | O   |
| 30 | 3.93 | 148-ARG | CB  | 159-TYR | CE1 |
| 31 | 3.99 | 148-ARG | CD  | 160-PHE | CD1 |

<.....> Number of potential hydrogen bonds 0

| AA-residue-### | Contacts |
|----------------|----------|
| PRO----- 58    | 1        |
| ARG----- 69    | 6        |
| THR----- 73    | 6        |

```

TRP-----121      10
SER-----147      5
ARG-----148      7

```

```

>>>> Inter-molecular distances 31 Below 4-A 31
>>> Hydrophobic 14 Hydrophilic 3 Mixed 14
>> Main-chain/Main-chain 0 Side-chain/Side-chain 19 Mixed 12

```

**This is step \* \* \* 10 \* \* \***

```

* * * The PDB coordinates file-name /users/andrzej/musca/cypx/1M63.pdb
Chain identifier (sequence) >>> |C|
Number of residues in IDRES(*) 165
Starting from the index IDRES 1
Number of effective XYZ-coordinates 1265

```

```

* * * The PDB coordinates file-name /users/andrzej/musca/cypx/1M63.pdb
Chain identifier (sequence) >>> |B|
Number of residues in IDRES(*) 158
Starting from the index IDRES 12
Number of effective XYZ-coordinates 1262

```

Number of used coordinates 1265 1262

|    |        |         |     |         |     |
|----|--------|---------|-----|---------|-----|
| 1  | 3.85   | 69-ARG  | CZ  | 164-LYS | O   |
| 2  | 3.51   | 69-ARG  | NH1 | 164-LYS | O   |
| 3  | 3.73   | 69-ARG  | NH2 | 164-LYS | CA  |
| 4  | 3.39   | 69-ARG  | NH2 | 164-LYS | O   |
| 5  | 3.44   | 69-ARG  | NH2 | 164-LYS | CB  |
| 6  | 3.66   | 69-ARG  | NH2 | 164-LYS | CG  |
| 7  | 3.96   | 71-ASN  | CG  | 164-LYS | NZ  |
| 8  | 3.56   | 71-ASN  | ND2 | 164-LYS | CE  |
| 9  | 2.79   | 71-ASN  | ND2 | 164-LYS | NZ  |
| 10 | 3.41   | 103-ALA | C   | 122-ASN | ND2 |
| 11 | 3.06 * | 103-ALA | O   | 122-ASN | ND2 |
| 12 | 3.51   | 104-GLY | N   | 122-ASN | ND2 |
| 13 | 3.88   | 104-GLY | CA  | 122-ASN | CG  |
| 14 | 3.91   | 104-GLY | CA  | 122-ASN | OD1 |
| 15 | 3.25   | 104-GLY | CA  | 122-ASN | ND2 |
| 16 | 3.86   | 105-PRO | CD  | 122-ASN | OD1 |

<.....> Number of potential hydrogen bonds 1

| AA-residue-### | Contacts |
|----------------|----------|
| ARG----- 69    | 5        |
| ASN----- 71    | 4        |
| ALA-----103    | 3        |
| GLY-----104    | 5        |
| PRO-----105    | 2        |

```

>>>> Inter-molecular distances 16 Below 4-A 16
>>> Hydrophobic 1 Hydrophilic 5 Mixed 10
>> Main-chain/Main-chain 0 Side-chain/Side-chain 6 Mixed 10

```

**This is step \* \* \* 11 \* \* \***

```

* * * The PDB coordinates file-name /users/andrzej/musca/cypx/1CWA.pdb
Chain identifier (sequence) >>> |C|
Number of residues in IDRES(*) 11
Starting from the index IDRES 1
Number of effective XYZ-coordinates 84

```

```

* * * The PDB coordinates file-name /users/andrzej/musca/cypx/1CWA.pdb

```

Chain identifier (sequence) >>> |A|  
 Number of residues in IDRES(\*) 165  
 Starting from the index IDRES 1  
 Number of effective XYZ-coordinates 1265

| Number of used coordinates |        | 84 1265 |     |         |     |
|----------------------------|--------|---------|-----|---------|-----|
| 1                          | 3.63   | 1-BMT   | CN  | 55-ARG  | NH1 |
| 2                          | 3.05   | 1-BMT   | CA  | 102-ASN | O   |
| 3                          | 3.41   | 1-BMT   | C   | 102-ASN | O   |
| 4                          | 3.15 * | 1-BMT   | O   | 63-GLN  | NE2 |
| 5                          | 3.39   | 1-BMT   | CB  | 102-ASN | O   |
| 6                          | 3.41   | 1-BMT   | CD1 | 102-ASN | O   |
| 7                          | 3.95   | 1-BMT   | CD1 | 102-ASN | ND2 |
| 8                          | 3.64   | 1-BMT   | CH  | 103-ALA | O   |
| 9                          | 3.86   | 2-ABA   | N   | 102-ASN | C   |
| 10                         | 2.92 * | 2-ABA   | N   | 102-ASN | O   |
| 11                         | 3.27   | 2-ABA   | CA  | 72-GLY  | O   |
| 12                         | 3.16   | 2-ABA   | C   | 72-GLY  | O   |
| 13                         | 3.82   | 2-ABA   | O   | 72-GLY  | O   |
| 14                         | 3.94   | 2-ABA   | O   | 103-ALA | CB  |
| 15                         | 3.55   | 2-ABA   | CB  | 72-GLY  | O   |
| 16                         | 3.94   | 2-ABA   | CB  | 102-ASN | O   |
| 17                         | 3.64   | 2-ABA   | CB  | 111-GLN | NE2 |
| 18                         | 3.80   | 2-ABA   | CG  | 101-ALA | C   |
| 19                         | 3.72   | 2-ABA   | CG  | 101-ALA | CB  |
| 20                         | 3.58   | 2-ABA   | CG  | 102-ASN | N   |
| 21                         | 3.78   | 2-ABA   | CG  | 102-ASN | CA  |
| 22                         | 3.86   | 2-ABA   | CG  | 102-ASN | C   |
| 23                         | 3.64   | 2-ABA   | CG  | 102-ASN | O   |
| 24                         | 3.87   | 2-ABA   | CG  | 111-GLN | CB  |
| 25                         | 3.72   | 2-ABA   | CG  | 111-GLN | CD  |
| 26                         | 3.81   | 2-ABA   | CG  | 111-GLN | OE1 |
| 27                         | 3.78   | 2-ABA   | CG  | 111-GLN | NE2 |
| 28                         | 3.98   | 3-SAR   | N   | 72-GLY  | C   |
| 29                         | 3.16 * | 3-SAR   | N   | 72-GLY  | O   |
| 30                         | 3.99   | 3-SAR   | CA  | 72-GLY  | O   |
| 31                         | 3.88   | 3-SAR   | CN  | 72-GLY  | C   |
| 32                         | 3.32   | 3-SAR   | CN  | 72-GLY  | O   |
| 33                         | 3.81   | 5-VAL   | CG1 | 55-ARG  | NE  |
| 34                         | 3.77   | 5-VAL   | CG1 | 55-ARG  | NH2 |
| 35                         | 3.93   | 9-MLE   | CB  | 60-PHE  | CE2 |
| 36                         | 3.81   | 9-MLE   | CB  | 121-TRP | NE1 |
| 37                         | 3.70   | 9-MLE   | CB  | 121-TRP | CZ2 |
| 38                         | 3.50   | 9-MLE   | CD1 | 121-TRP | CZ2 |
| 39                         | 3.94   | 9-MLE   | CD1 | 121-TRP | CH2 |
| 40                         | 3.89   | 9-MLE   | CD2 | 60-PHE  | CD2 |
| 41                         | 3.68   | 9-MLE   | C   | 60-PHE  | CE2 |
| 42                         | 3.60   | 9-MLE   | C   | 60-PHE  | CZ  |
| 43                         | 3.96   | 9-MLE   | C   | 121-TRP | NE1 |
| 44                         | 3.89   | 9-MLE   | O   | 60-PHE  | CE1 |
| 45                         | 3.73   | 9-MLE   | O   | 60-PHE  | CE2 |
| 46                         | 3.19   | 9-MLE   | O   | 60-PHE  | CZ  |
| 47                         | 3.74   | 9-MLE   | O   | 121-TRP | CD1 |
| 48                         | 2.90 * | 9-MLE   | O   | 121-TRP | NE1 |
| 49                         | 3.88   | 9-MLE   | O   | 121-TRP | CE2 |
| 50                         | 3.32   | 10-MLE  | CN  | 55-ARG  | NH2 |
| 51                         | 3.92   | 10-MLE  | C   | 55-ARG  | NH1 |
| 52                         | 3.25   | 10-MLE  | O   | 55-ARG  | CZ  |
| 53                         | 2.77   | 10-MLE  | O   | 55-ARG  | NH1 |
| 54                         | 2.85 * | 10-MLE  | O   | 55-ARG  | NH2 |
| 55                         | 3.70   | 10-MLE  | O   | 60-PHE  | CE2 |
| 56                         | 3.63   | 11-MVA  | CN  | 122-LEU | CD2 |

|    |      |        |     |         |     |
|----|------|--------|-----|---------|-----|
| 57 | 3.40 | 11-MVA | CN  | 126-HIS | CE1 |
| 58 | 3.23 | 11-MVA | CN  | 126-HIS | NE2 |
| 59 | 3.80 | 11-MVA | CA  | 55-ARG  | NH1 |
| 60 | 3.85 | 11-MVA | CB  | 113-PHE | CD1 |
| 61 | 3.96 | 11-MVA | CB  | 113-PHE | CE1 |
| 62 | 3.93 | 11-MVA | CG1 | 63-GLN  | CG  |
| 63 | 3.54 | 11-MVA | CG1 | 63-GLN  | CD  |
| 64 | 3.50 | 11-MVA | CG1 | 63-GLN  | OE1 |
| 65 | 3.99 | 11-MVA | CG1 | 63-GLN  | NE2 |
| 66 | 3.74 | 11-MVA | CG1 | 101-ALA | CB  |
| 67 | 3.88 | 11-MVA | CG1 | 113-PHE | CB  |
| 68 | 3.74 | 11-MVA | CG1 | 113-PHE | CG  |
| 69 | 3.49 | 11-MVA | CG1 | 113-PHE | CD1 |
| 70 | 3.50 | 11-MVA | CG2 | 60-PHE  | CZ  |
| 71 | 3.89 | 11-MVA | CG2 | 61-MET  | CG  |
| 72 | 3.90 | 11-MVA | CG2 | 113-PHE | CG  |
| 73 | 3.88 | 11-MVA | CG2 | 113-PHE | CD2 |
| 74 | 3.95 | 11-MVA | CG2 | 113-PHE | CE2 |

<.....> Number of potential hydrogen bonds 5

| AA-residue-### | Contacts |
|----------------|----------|
| BMT----- 1     | 7        |
| ABA----- 2     | 20       |
| SAR----- 3     | 6        |
| VAL----- 5     | 3        |
| MLE----- 9     | 16       |
| MLE----- 10    | 7        |
| MVA----- 11    | 20       |

>>> Inter-molecular distances 74 Below 4-A 74

>>> Hydrophobic 26 Hydrophilic 7 Mixed 41

>> Main-chain/Main-chain 10 Side-chain/Side-chain 30 Mixed 34

**This is step \* \* \* 12 \* \* \***

\* \* \* The PDB coordinates file-name /users/andrzej/musca/cypx/1CWA.pdb

Chain identifier (sequence) >>> |A|  
 Number of residues in IDRES(\*) 165  
 Starting from the index IDRES 1  
 Number of effective XYZ-coordinates 1265

\* \* \* The PDB coordinates file-name /users/andrzej/musca/cypx/1CWA.pdb

Chain identifier (sequence) >>> |C|  
 Number of residues in IDRES(\*) 11  
 Starting from the index IDRES 1  
 Number of effective XYZ-coordinates 84

Number of used coordinates 1265 84

|    |        |        |     |        |     |
|----|--------|--------|-----|--------|-----|
| 1  | 3.81   | 55-ARG | NE  | 5-VAL  | CG1 |
| 2  | 3.25   | 55-ARG | CZ  | 10-MLE | O   |
| 3  | 3.63   | 55-ARG | NH1 | 1-BMT  | CN  |
| 4  | 3.92   | 55-ARG | NH1 | 10-MLE | C   |
| 5  | 2.77   | 55-ARG | NH1 | 10-MLE | O   |
| 6  | 3.80   | 55-ARG | NH1 | 11-MVA | CA  |
| 7  | 3.77   | 55-ARG | NH2 | 5-VAL  | CG1 |
| 8  | 3.32   | 55-ARG | NH2 | 10-MLE | CN  |
| 9  | 2.85 * | 55-ARG | NH2 | 10-MLE | O   |
| 10 | 3.89   | 60-PHE | CD2 | 9-MLE  | CD2 |

|    |        |         |     |        |     |
|----|--------|---------|-----|--------|-----|
| 11 | 3.89   | 60-PHE  | CE1 | 9-MLE  | O   |
| 12 | 3.93   | 60-PHE  | CE2 | 9-MLE  | CB  |
| 13 | 3.68   | 60-PHE  | CE2 | 9-MLE  | C   |
| 14 | 3.73   | 60-PHE  | CE2 | 9-MLE  | O   |
| 15 | 3.70   | 60-PHE  | CE2 | 10-MLE | O   |
| 16 | 3.60   | 60-PHE  | CZ  | 9-MLE  | C   |
| 17 | 3.19   | 60-PHE  | CZ  | 9-MLE  | O   |
| 18 | 3.50   | 60-PHE  | CZ  | 11-MVA | CG2 |
| 19 | 3.89   | 61-MET  | CG  | 11-MVA | CG2 |
| 20 | 3.93   | 63-GLN  | CG  | 11-MVA | CG1 |
| 21 | 3.54   | 63-GLN  | CD  | 11-MVA | CG1 |
| 22 | 3.50   | 63-GLN  | OE1 | 11-MVA | CG1 |
| 23 | 3.15 * | 63-GLN  | NE2 | 1-BMT  | O   |
| 24 | 3.99   | 63-GLN  | NE2 | 11-MVA | CG1 |
| 25 | 3.98   | 72-GLY  | C   | 3-SAR  | N   |
| 26 | 3.88   | 72-GLY  | C   | 3-SAR  | CN  |
| 27 | 3.27   | 72-GLY  | O   | 2-ABA  | CA  |
| 28 | 3.16   | 72-GLY  | O   | 2-ABA  | C   |
| 29 | 3.82   | 72-GLY  | O   | 2-ABA  | O   |
| 30 | 3.55   | 72-GLY  | O   | 2-ABA  | CB  |
| 31 | 3.16 * | 72-GLY  | O   | 3-SAR  | N   |
| 32 | 3.99   | 72-GLY  | O   | 3-SAR  | CA  |
| 33 | 3.32   | 72-GLY  | O   | 3-SAR  | CN  |
| 34 | 3.80   | 101-ALA | C   | 2-ABA  | CG  |
| 35 | 3.72   | 101-ALA | CB  | 2-ABA  | CG  |
| 36 | 3.74   | 101-ALA | CB  | 11-MVA | CG1 |
| 37 | 3.58   | 102-ASN | N   | 2-ABA  | CG  |
| 38 | 3.78   | 102-ASN | CA  | 2-ABA  | CG  |
| 39 | 3.86   | 102-ASN | C   | 2-ABA  | N   |
| 40 | 3.86   | 102-ASN | C   | 2-ABA  | CG  |
| 41 | 3.05   | 102-ASN | O   | 1-BMT  | CA  |
| 42 | 3.41   | 102-ASN | O   | 1-BMT  | C   |
| 43 | 3.39   | 102-ASN | O   | 1-BMT  | CB  |
| 44 | 3.41   | 102-ASN | O   | 1-BMT  | CD1 |
| 45 | 2.92 * | 102-ASN | O   | 2-ABA  | N   |
| 46 | 3.94   | 102-ASN | O   | 2-ABA  | CB  |
| 47 | 3.64   | 102-ASN | O   | 2-ABA  | CG  |
| 48 | 3.95   | 102-ASN | ND2 | 1-BMT  | CD1 |
| 49 | 3.64   | 103-ALA | O   | 1-BMT  | CH  |
| 50 | 3.94   | 103-ALA | CB  | 2-ABA  | O   |
| 51 | 3.87   | 111-GLN | CB  | 2-ABA  | CG  |
| 52 | 3.72   | 111-GLN | CD  | 2-ABA  | CG  |
| 53 | 3.81   | 111-GLN | OE1 | 2-ABA  | CG  |
| 54 | 3.64   | 111-GLN | NE2 | 2-ABA  | CB  |
| 55 | 3.78   | 111-GLN | NE2 | 2-ABA  | CG  |
| 56 | 3.88   | 113-PHE | CB  | 11-MVA | CG1 |
| 57 | 3.74   | 113-PHE | CG  | 11-MVA | CG1 |
| 58 | 3.90   | 113-PHE | CG  | 11-MVA | CG2 |
| 59 | 3.85   | 113-PHE | CD1 | 11-MVA | CB  |
| 60 | 3.49   | 113-PHE | CD1 | 11-MVA | CG1 |
| 61 | 3.88   | 113-PHE | CD2 | 11-MVA | CG2 |
| 62 | 3.96   | 113-PHE | CE1 | 11-MVA | CB  |
| 63 | 3.95   | 113-PHE | CE2 | 11-MVA | CG2 |
| 64 | 3.74   | 121-TRP | CD1 | 9-MLE  | O   |
| 65 | 3.81   | 121-TRP | NE1 | 9-MLE  | CB  |
| 66 | 3.96   | 121-TRP | NE1 | 9-MLE  | C   |
| 67 | 2.90 * | 121-TRP | NE1 | 9-MLE  | O   |
| 68 | 3.88   | 121-TRP | CE2 | 9-MLE  | O   |
| 69 | 3.70   | 121-TRP | CZ2 | 9-MLE  | CB  |
| 70 | 3.50   | 121-TRP | CZ2 | 9-MLE  | CD1 |
| 71 | 3.94   | 121-TRP | CH2 | 9-MLE  | CD1 |
| 72 | 3.63   | 122-LEU | CD2 | 11-MVA | CN  |
| 73 | 3.40   | 126-HIS | CE1 | 11-MVA | CN  |

74 3.23 126-HIS NE2 11-MVA CN

<.....> Number of potential hydrogen bonds 5

| AA-residue-### | Contacts |
|----------------|----------|
| ARG----- 55    | 8        |
| PHE----- 60    | 10       |
| MET----- 61    | 2        |
| GLN----- 63    | 6        |
| GLY----- 72    | 10       |
| ALA-----101    | 4        |
| ASN-----102    | 13       |
| ALA-----103    | 3        |
| GLN-----111    | 6        |
| PHE-----113    | 9        |
| TRP-----121    | 9        |
| LEU-----122    | 2        |
| HIS-----126    | 3        |

>>>> Inter-molecular distances 74 Below 4-A 74

>>> Hydrophobic 26 Hydrophilic 7 Mixed 41

>> Main-chain/Main-chain 10 Side-chain/Side-chain 30 Mixed 34

**This is step \* \* \* 13 \* \* \***

\* \* \* The PDB coordinates file-name /users/andrzej/musca/cypx/1ZKF.pdb  
 Chain identifier (sequence) >>> |A|  
 Number of residues in IDRES(\*) 165  
 Starting from the index IDRES 1  
 Number of effective XYZ-coordinates 1265

\* \* \* The PDB coordinates file-name /users/andrzej/musca/cypx/1ZKF.pdb  
 Chain identifier (sequence) >>> |C|  
 Number of residues in IDRES(\*) 6  
 Starting from the index IDRES 1  
 Number of effective XYZ-coordinates 43

Number of used coordinates 1265 43

|    |        |        |     |       |     |
|----|--------|--------|-----|-------|-----|
| 1  | 3.40   | 55-ARG | CZ  | 4-PRO | O   |
| 2  | 3.92   | 55-ARG | NH1 | 2-ALA | O   |
| 3  | 3.62   | 55-ARG | NH1 | 3-GLY | C   |
| 4  | 3.77   | 55-ARG | NH1 | 3-GLY | O   |
| 5  | 3.70   | 55-ARG | NH1 | 4-PRO | N   |
| 6  | 3.94   | 55-ARG | NH1 | 4-PRO | C   |
| 7  | 2.95   | 55-ARG | NH1 | 4-PRO | O   |
| 8  | 3.85   | 55-ARG | NH1 | 4-PRO | CD  |
| 9  | 2.98 * | 55-ARG | NH2 | 4-PRO | O   |
| 10 | 3.69   | 57-ILE | CG2 | 6-NIT | ON1 |
| 11 | 3.97   | 57-ILE | CD1 | 6-NIT | C5  |
| 12 | 3.81   | 60-PHE | CD2 | 6-NIT | C4  |
| 13 | 3.70   | 60-PHE | CD2 | 6-NIT | C5  |
| 14 | 3.65   | 60-PHE | CE2 | 6-NIT | C1  |
| 15 | 3.86   | 60-PHE | CE2 | 6-NIT | C2  |
| 16 | 3.89   | 60-PHE | CE2 | 6-NIT | C5  |
| 17 | 3.75   | 60-PHE | CZ  | 4-PRO | CG  |
| 18 | 3.88   | 60-PHE | CZ  | 5-PHE | O   |
| 19 | 3.99   | 63-GLN | CD  | 2-ALA | O   |
| 20 | 3.45   | 63-GLN | CD  | 3-GLY | O   |
| 21 | 3.77   | 63-GLN | OE1 | 2-ALA | O   |

|    |        |         |     |       |    |
|----|--------|---------|-----|-------|----|
| 22 | 3.91   | 63-GLN  | OE1 | 3-GLY | C  |
| 23 | 3.16   | 63-GLN  | OE1 | 3-GLY | O  |
| 24 | 3.83   | 63-GLN  | OE1 | 4-PRO | CD |
| 25 | 3.35   | 63-GLN  | NE2 | 2-ALA | O  |
| 26 | 3.34   | 63-GLN  | NE2 | 3-GLY | O  |
| 27 | 3.56   | 72-GLY  | O   | 1-SIN | C3 |
| 28 | 3.82   | 72-GLY  | O   | 1-SIN | C4 |
| 29 | 3.11 * | 72-GLY  | O   | 2-ALA | N  |
| 30 | 3.93   | 72-GLY  | O   | 2-ALA | CB |
| 31 | 3.78   | 73-THR  | CG2 | 1-SIN | C1 |
| 32 | 3.80   | 73-THR  | CG2 | 1-SIN | O1 |
| 33 | 3.77   | 73-THR  | CG2 | 1-SIN | O2 |
| 34 | 3.47   | 101-ALA | CB  | 3-GLY | O  |
| 35 | 3.89   | 102-ASN | N   | 2-ALA | CB |
| 36 | 3.97   | 102-ASN | C   | 2-ALA | CA |
| 37 | 3.82   | 102-ASN | C   | 2-ALA | CB |
| 38 | 3.76   | 102-ASN | C   | 3-GLY | N  |
| 39 | 3.52   | 102-ASN | O   | 2-ALA | CA |
| 40 | 3.52   | 102-ASN | O   | 2-ALA | C  |
| 41 | 3.71   | 102-ASN | O   | 2-ALA | CB |
| 42 | 2.69 * | 102-ASN | O   | 3-GLY | N  |
| 43 | 3.57   | 102-ASN | O   | 3-GLY | CA |
| 44 | 3.86   | 111-GLN | OE1 | 2-ALA | CB |
| 45 | 3.66   | 113-PHE | CD1 | 4-PRO | CD |
| 46 | 3.77   | 113-PHE | CE1 | 4-PRO | CD |
| 47 | 3.99   | 113-PHE | CZ  | 4-PRO | CG |
| 48 | 3.33   | 121-TRP | NE1 | 5-PHE | O  |
| 49 | 3.84   | 121-TRP | CZ2 | 6-NIT | C2 |
| 50 | 3.67   | 121-TRP | CZ2 | 6-NIT | C3 |
| 51 | 3.76   | 122-LEU | CD1 | 4-PRO | CB |
| 52 | 3.50   | 122-LEU | CD2 | 4-PRO | CB |
| 53 | 3.84   | 126-HIS | CE1 | 4-PRO | N  |
| 54 | 3.73   | 126-HIS | CE1 | 4-PRO | CA |
| 55 | 3.97   | 126-HIS | CE1 | 4-PRO | CB |
| 56 | 3.58   | 126-HIS | NE2 | 4-PRO | CA |
| 57 | 3.62   | 126-HIS | NE2 | 4-PRO | CB |

<.....> Number of potential hydrogen bonds 3

| AA-residue-### | Contacts |
|----------------|----------|
| ARG----- 55    | 8        |
| ILE----- 57    | 3        |
| PHE----- 60    | 8        |
| GLN----- 63    | 9        |
| GLY----- 72    | 5        |
| THR----- 73    | 4        |
| ALA-----101    | 2        |
| ASN-----102    | 10       |
| GLN-----111    | 2        |
| PHE-----113    | 4        |
| TRP-----121    | 4        |
| LEU-----122    | 3        |
| HIS-----126    | 6        |

>>> Inter-molecular distances 57 Below 4-A 57

>>> Hydrophobic 10 Hydrophilic 12 Mixed 35

**This is step \* \* \* 14 \* \* \***

\* \* \* The PDB coordinates file-name /users/andrzej/musca/cypx/1YND.pdb  
Chain identifier (sequence) >>> |A|

Number of residues in IDRES(\*) 164  
 Starting from the index IDRES 2  
 Number of effective XYZ-coordinates 1257

\* \* \* The PDB coordinates file-name /users/andrzej/musca/cypx/1YND.pdb  
 Chain identifier (sequence) >>> | |  
 Number of residues in IDRES(\*) 2  
 Starting from the index IDRES 401  
 Number of effective XYZ-coordinates 155

Number of used coordinates 1257 155

|    |      |         |     |         |     |
|----|------|---------|-----|---------|-----|
| 1  | 3.20 | 55-ARG  | CD  | 401-SFA | O66 |
| 2  | 4.00 | 55-ARG  | CZ  | 401-SFA | C19 |
| 3  | 3.91 | 55-ARG  | NH1 | 401-SFA | C17 |
| 4  | 3.68 | 55-ARG  | NH1 | 401-SFA | O72 |
| 5  | 3.21 | 55-ARG  | NH2 | 401-SFA | O69 |
| 6  | 3.71 | 55-ARG  | NH2 | 401-SFA | N65 |
| 7  | 3.71 | 55-ARG  | NH2 | 401-SFA | O66 |
| 8  | 3.75 | 57-ILE  | CG2 | 401-SFA | C45 |
| 9  | 3.51 | 59-GLY  | O   | 401-SFA | C35 |
| 10 | 3.56 | 59-GLY  | O   | 401-SFA | C34 |
| 11 | 3.74 | 59-GLY  | O   | 401-SFA | C47 |
| 12 | 3.98 | 60-PHE  | CD1 | 401-SFA | C45 |
| 13 | 3.93 | 60-PHE  | CD2 | 401-SFA | C32 |
| 14 | 3.94 | 60-PHE  | CE1 | 401-SFA | C26 |
| 15 | 3.60 | 60-PHE  | CE1 | 401-SFA | C25 |
| 16 | 3.61 | 60-PHE  | CE1 | 401-SFA | C24 |
| 17 | 3.98 | 60-PHE  | CE1 | 401-SFA | O65 |
| 18 | 3.97 | 60-PHE  | CE1 | 401-SFA | C3  |
| 19 | 3.94 | 60-PHE  | CE2 | 401-SFA | C48 |
| 20 | 3.85 | 60-PHE  | CZ  | 401-SFA | C3  |
| 21 | 3.57 | 61-MET  | CE  | 401-SFA | O66 |
| 22 | 3.98 | 63-GLN  | CD  | 401-SFA | N6  |
| 23 | 3.97 | 63-GLN  | CD  | 401-SFA | N65 |
| 24 | 3.39 | 63-GLN  | OE1 | 401-SFA | N6  |
| 25 | 3.06 | 63-GLN  | OE1 | 401-SFA | N65 |
| 26 | 3.65 | 63-GLN  | OE1 | 401-SFA | C5  |
| 27 | 3.87 | 63-GLN  | OE1 | 401-SFA | O66 |
| 28 | 3.88 | 63-GLN  | NE2 | 401-SFA | C10 |
| 29 | 3.03 | 63-GLN  | NE2 | 401-SFA | O69 |
| 30 | 3.98 | 72-GLY  | O   | 401-SFA | C55 |
| 31 | 3.74 | 73-THR  | O   | 401-SFA | C54 |
| 32 | 3.92 | 73-THR  | CB  | 401-SFA | C53 |
| 33 | 3.44 | 73-THR  | CB  | 401-SFA | O71 |
| 34 | 3.41 | 73-THR  | CG2 | 401-SFA | O71 |
| 35 | 3.30 | 101-ALA | CA  | 401-SFA | O67 |
| 36 | 3.62 | 101-ALA | C   | 401-SFA | O67 |
| 37 | 3.86 | 101-ALA | CB  | 401-SFA | C57 |
| 38 | 3.93 | 101-ALA | CB  | 401-SFA | C7  |
| 39 | 3.35 | 101-ALA | CB  | 401-SFA | O67 |
| 40 | 3.98 | 101-ALA | CB  | 401-SFA | C5  |
| 41 | 3.90 | 102-ASN | N   | 401-SFA | C57 |
| 42 | 2.99 | 102-ASN | N   | 401-SFA | O67 |
| 43 | 3.88 | 102-ASN | C   | 401-SFA | N9  |
| 44 | 3.65 | 102-ASN | O   | 401-SFA | C11 |
| 45 | 3.68 | 102-ASN | O   | 401-SFA | C10 |
| 46 | 2.80 | 102-ASN | O   | 401-SFA | N9  |
| 47 | 3.59 | 102-ASN | O   | 401-SFA | C8  |
| 48 | 3.50 | 102-ASN | O   | 401-SFA | C58 |
| 49 | 3.87 | 102-ASN | O   | 401-SFA | C7  |
| 50 | 3.26 | 102-ASN | O   | 401-SFA | O67 |
| 51 | 3.74 | 103-ALA | CA  | 401-SFA | O70 |



|    |      |         |     |         |     |
|----|------|---------|-----|---------|-----|
| 52 | 3.49 | 103-ALA | C   | 402-SFA | O73 |
| 53 | 3.79 | 103-ALA | O   | 402-SFA | O73 |
| 54 | 3.83 | 103-ALA | O   | 402-SFA | C15 |
| 55 | 3.98 | 103-ALA | O   | 402-SFA | C51 |
| 56 | 3.27 | 103-ALA | CB  | 401-SFA | O70 |
| 57 | 3.40 | 104-GLY | N   | 402-SFA | O73 |
| 58 | 3.73 | 104-GLY | CA  | 402-SFA | O73 |
| 59 | 3.89 | 111-GLN | CB  | 401-SFA | C57 |
| 60 | 3.79 | 111-GLN | CD  | 401-SFA | C55 |
| 61 | 3.57 | 111-GLN | CD  | 401-SFA | C57 |
| 62 | 3.71 | 111-GLN | OE1 | 401-SFA | C55 |
| 63 | 3.55 | 111-GLN | OE1 | 401-SFA | C57 |
| 64 | 3.64 | 111-GLN | NE2 | 401-SFA | C55 |
| 65 | 3.72 | 111-GLN | NE2 | 401-SFA | C56 |
| 66 | 3.84 | 111-GLN | NE2 | 401-SFA | C57 |
| 67 | 3.54 | 113-PHE | CD1 | 401-SFA | C5  |
| 68 | 3.96 | 113-PHE | CD1 | 401-SFA | C4  |
| 69 | 3.69 | 113-PHE | CE1 | 401-SFA | C5  |
| 70 | 3.83 | 113-PHE | CE1 | 401-SFA | C4  |
| 71 | 3.99 | 118-LYS | O   | 401-SFA | C47 |
| 72 | 3.75 | 119-THR | CB  | 401-SFA | C48 |
| 73 | 3.87 | 121-TRP | CB  | 401-SFA | C29 |
| 74 | 3.89 | 121-TRP | CZ2 | 402-SFA | C49 |
| 75 | 3.72 | 121-TRP | CZ3 | 401-SFA | O68 |
| 76 | 3.90 | 121-TRP | CZ3 | 402-SFA | C22 |
| 77 | 3.97 | 121-TRP | CH2 | 402-SFA | C49 |
| 78 | 3.51 | 121-TRP | CH2 | 402-SFA | C22 |
| 79 | 3.32 | 122-LEU | CD2 | 401-SFA | O68 |
| 80 | 3.92 | 126-HIS | ND1 | 401-SFA | O67 |
| 81 | 3.59 | 126-HIS | CD2 | 401-SFA | O68 |
| 82 | 3.65 | 126-HIS | CE1 | 401-SFA | C60 |
| 83 | 3.72 | 126-HIS | CE1 | 401-SFA | O68 |
| 84 | 4.00 | 126-HIS | CE1 | 401-SFA | C7  |
| 85 | 3.17 | 126-HIS | CE1 | 401-SFA | O67 |
| 86 | 3.45 | 126-HIS | NE2 | 401-SFA | C60 |
| 87 | 3.49 | 126-HIS | NE2 | 401-SFA | C61 |
| 88 | 2.71 | 126-HIS | NE2 | 401-SFA | O68 |

<.....> Number of potential hydrogen bonds 0

| AA-residue-### | Contacts |
|----------------|----------|
| ARG----- 55    | 6        |
| ILE----- 57    | 2        |
| GLY----- 59    | 4        |
| PHE----- 60    | 10       |
| MET----- 61    | 2        |
| GLN----- 63    | 9        |
| GLY----- 72    | 2        |
| THR----- 73    | 5        |
| ALA-----101    | 7        |
| ASN-----102    | 11       |
| ALA-----103    | 7        |
| GLY-----104    | 3        |
| GLN-----111    | 9        |
| PHE-----113    | 5        |
| LYS-----118    | 2        |
| THR-----119    | 2        |
| TRP-----121    | 7        |
| LEU-----122    | 2        |
| HIS-----126    | 10       |

>>>> Inter-molecular distances 88 Below 4-A 88

>>> Hydrophobic      0 Hydrophilic      0 Mixed      88

>> Main-chain/Main-chain      0 Side-chain/Side-chain      0 Mixed      88

**This is step \* \* \* 15 \* \* \***

```
* * * The PDB coordinates file-name /users/andrzej/musca/cypx/1YND.pdb
Chain identifier (sequence) >>> | |
Number of residues in IDRES(*)      2
Starting from the index IDRES 401
Number of effective XYZ-coordinates      155
```

```
* * * The PDB coordinates file-name /users/andrzej/musca/cypx/1YND.pdb
Chain identifier (sequence) >>> |B|
Number of residues in IDRES(*)      164
Starting from the index IDRES      2
Number of effective XYZ-coordinates      1257
```

Number of used coordinates      155 1257

|    |      |         |     |         |     |
|----|------|---------|-----|---------|-----|
| 1  | 3.88 | 401-SFA | C43 | 121-TRP | CG  |
| 2  | 3.45 | 401-SFA | C43 | 121-TRP | CD2 |
| 3  | 3.95 | 401-SFA | C43 | 121-TRP | CE2 |
| 4  | 3.40 | 401-SFA | C43 | 121-TRP | CE3 |
| 5  | 3.87 | 401-SFA | C43 | 121-TRP | CZ3 |
| 6  | 3.86 | 401-SFA | C44 | 121-TRP | CE3 |
| 7  | 3.84 | 401-SFA | C38 | 121-TRP | CZ2 |
| 8  | 3.73 | 401-SFA | C45 | 121-TRP | CZ2 |
| 9  | 3.81 | 401-SFA | C20 | 125-LYS | CE  |
| 10 | 3.99 | 401-SFA | C19 | 125-LYS | CE  |
| 11 | 3.77 | 401-SFA | C19 | 125-LYS | NZ  |
| 12 | 3.81 | 401-SFA | C18 | 125-LYS | NZ  |
| 13 | 3.84 | 401-SFA | O73 | 103-ALA | CA  |
| 14 | 3.36 | 401-SFA | O73 | 103-ALA | C   |
| 15 | 3.80 | 401-SFA | O73 | 103-ALA | O   |
| 16 | 3.19 | 401-SFA | O73 | 104-GLY | N   |
| 17 | 3.60 | 401-SFA | O73 | 104-GLY | CA  |
| 18 | 3.85 | 401-SFA | O73 | 125-LYS | NZ  |
| 19 | 3.75 | 401-SFA | C15 | 103-ALA | O   |
| 20 | 3.82 | 401-SFA | C51 | 103-ALA | O   |
| 21 | 3.75 | 402-SFA | C45 | 57-ILE  | CG2 |
| 22 | 3.90 | 402-SFA | C45 | 60-PHE  | CD1 |
| 23 | 3.60 | 402-SFA | C35 | 59-GLY  | O   |
| 24 | 3.55 | 402-SFA | C34 | 59-GLY  | O   |
| 25 | 3.53 | 402-SFA | C47 | 59-GLY  | O   |
| 26 | 3.81 | 402-SFA | C32 | 60-PHE  | CD2 |
| 27 | 3.89 | 402-SFA | C32 | 60-PHE  | CE2 |
| 28 | 3.95 | 402-SFA | C30 | 60-PHE  | CE2 |
| 29 | 3.91 | 402-SFA | C30 | 60-PHE  | CZ  |
| 30 | 3.84 | 402-SFA | C48 | 60-PHE  | CE2 |
| 31 | 3.77 | 402-SFA | C48 | 119-THR | CB  |
| 32 | 3.94 | 402-SFA | C26 | 60-PHE  | CE1 |
| 33 | 3.65 | 402-SFA | C25 | 60-PHE  | CE1 |
| 34 | 3.66 | 402-SFA | C24 | 60-PHE  | CE1 |
| 35 | 3.98 | 402-SFA | C19 | 55-ARG  | NH1 |
| 36 | 3.95 | 402-SFA | C17 | 55-ARG  | NH1 |
| 37 | 3.67 | 402-SFA | O72 | 55-ARG  | NH1 |
| 38 | 3.75 | 402-SFA | C54 | 73-THR  | O   |
| 39 | 3.64 | 402-SFA | O71 | 73-THR  | CB  |
| 40 | 3.75 | 402-SFA | O71 | 73-THR  | CG2 |
| 41 | 3.84 | 402-SFA | O70 | 103-ALA | CA  |
| 42 | 3.40 | 402-SFA | O70 | 103-ALA | CB  |

|    |      |         |     |         |     |
|----|------|---------|-----|---------|-----|
| 43 | 3.72 | 402-SFA | C11 | 102-ASN | O   |
| 44 | 3.86 | 402-SFA | C55 | 72-GLY  | O   |
| 45 | 3.83 | 402-SFA | C55 | 111-GLN | CD  |
| 46 | 3.73 | 402-SFA | C55 | 111-GLN | OE1 |
| 47 | 3.61 | 402-SFA | C55 | 111-GLN | NE2 |
| 48 | 3.88 | 402-SFA | C56 | 72-GLY  | O   |
| 49 | 3.66 | 402-SFA | C56 | 111-GLN | NE2 |
| 50 | 3.84 | 402-SFA | C57 | 101-ALA | CB  |
| 51 | 3.88 | 402-SFA | C57 | 102-ASN | N   |
| 52 | 3.94 | 402-SFA | C57 | 111-GLN | CB  |
| 53 | 3.57 | 402-SFA | C57 | 111-GLN | CD  |
| 54 | 3.53 | 402-SFA | C57 | 111-GLN | OE1 |
| 55 | 3.77 | 402-SFA | C57 | 111-GLN | NE2 |
| 56 | 3.86 | 402-SFA | C10 | 63-GLN  | NE2 |
| 57 | 3.74 | 402-SFA | C10 | 102-ASN | O   |
| 58 | 3.19 | 402-SFA | O69 | 55-ARG  | NH2 |
| 59 | 3.03 | 402-SFA | O69 | 63-GLN  | NE2 |
| 60 | 3.90 | 402-SFA | N9  | 102-ASN | C   |
| 61 | 2.85 | 402-SFA | N9  | 102-ASN | O   |
| 62 | 3.65 | 402-SFA | C8  | 102-ASN | O   |
| 63 | 3.57 | 402-SFA | C58 | 102-ASN | O   |
| 64 | 3.91 | 402-SFA | C60 | 125-LYS | CE  |
| 65 | 3.68 | 402-SFA | C60 | 126-HIS | CE1 |
| 66 | 3.48 | 402-SFA | C60 | 126-HIS | NE2 |
| 67 | 3.83 | 402-SFA | C61 | 125-LYS | CE  |
| 68 | 3.55 | 402-SFA | C61 | 126-HIS | NE2 |
| 69 | 3.46 | 402-SFA | O68 | 122-LEU | CD2 |
| 70 | 3.61 | 402-SFA | O68 | 125-LYS | CD  |
| 71 | 3.37 | 402-SFA | O68 | 125-LYS | CE  |
| 72 | 3.62 | 402-SFA | O68 | 126-HIS | CD2 |
| 73 | 3.72 | 402-SFA | O68 | 126-HIS | CE1 |
| 74 | 2.73 | 402-SFA | O68 | 126-HIS | NE2 |
| 75 | 3.92 | 402-SFA | C7  | 101-ALA | CB  |
| 76 | 3.97 | 402-SFA | C7  | 102-ASN | O   |
| 77 | 3.26 | 402-SFA | O67 | 101-ALA | CA  |
| 78 | 3.58 | 402-SFA | O67 | 101-ALA | C   |
| 79 | 3.31 | 402-SFA | O67 | 101-ALA | CB  |
| 80 | 2.96 | 402-SFA | O67 | 102-ASN | N   |
| 81 | 3.36 | 402-SFA | O67 | 102-ASN | O   |
| 82 | 3.98 | 402-SFA | O67 | 126-HIS | ND1 |
| 83 | 3.24 | 402-SFA | O67 | 126-HIS | CE1 |
| 84 | 3.99 | 402-SFA | N6  | 63-GLN  | CD  |
| 85 | 3.44 | 402-SFA | N6  | 63-GLN  | OE1 |
| 86 | 3.69 | 402-SFA | N65 | 55-ARG  | NH2 |
| 87 | 3.99 | 402-SFA | N65 | 63-GLN  | CD  |
| 88 | 3.10 | 402-SFA | N65 | 63-GLN  | OE1 |
| 89 | 3.72 | 402-SFA | C5  | 63-GLN  | OE1 |
| 90 | 3.98 | 402-SFA | C5  | 101-ALA | CB  |
| 91 | 3.52 | 402-SFA | C5  | 113-PHE | CD1 |
| 92 | 3.69 | 402-SFA | C5  | 113-PHE | CE1 |
| 93 | 3.86 | 402-SFA | C4  | 113-PHE | CD1 |
| 94 | 3.74 | 402-SFA | C4  | 113-PHE | CE1 |
| 95 | 3.96 | 402-SFA | C4  | 113-PHE | CZ  |

<.....> Number of potential hydrogen bonds 0

| AA-residue-### | Contacts |
|----------------|----------|
| SFA-----401    | 19       |
| SFA-----402    | 76       |

>>>> Inter-molecular distances 95 Below 4-A 95

>>> Hydrophobic      0 Hydrophilic      0 Mixed      95

>> Main-chain/Main-chain      0 Side-chain/Side-chain      0 Mixed      95

**This is step \* \* \* 16 \* \* \***

```
* * * The PDB coordinates file-name /users/andrzej/musca/cypx/1C5F.pdb
Chain identifier (sequence) >>> |B|
Number of residues in IDRES(*)      11
Starting from the index IDRES      1
Number of effective XYZ-coordinates      84
```

```
* * * The PDB coordinates file-name /users/andrzej/musca/cypx/1C5F.pdb
Chain identifier (sequence) >>> |A|
Number of residues in IDRES(*)      177
Starting from the index IDRES      1
Number of effective XYZ-coordinates      1364
```

Number of used coordinates      84 1364

|    |        |       |     |         |     |
|----|--------|-------|-----|---------|-----|
| 1  | 3.95   | 1-BMT | CN  | 66-ARG  | CZ  |
| 2  | 3.70   | 1-BMT | CN  | 66-ARG  | NH1 |
| 3  | 2.88   | 1-BMT | CA  | 113-ASN | O   |
| 4  | 3.30   | 1-BMT | C   | 113-ASN | O   |
| 5  | 3.24   | 1-BMT | O   | 74-GLN  | NE2 |
| 6  | 3.29   | 1-BMT | CB  | 113-ASN | O   |
| 7  | 3.74   | 1-BMT | CG2 | 113-ASN | O   |
| 8  | 3.86   | 1-BMT | CD1 | 113-ASN | C   |
| 9  | 2.98   | 1-BMT | CD1 | 113-ASN | O   |
| 10 | 3.91   | 1-BMT | CD1 | 113-ASN | OD1 |
| 11 | 3.99   | 1-BMT | CD1 | 137-HIS | CE1 |
| 12 | 3.74   | 2-ABA | N   | 113-ASN | C   |
| 13 | 2.90 * | 2-ABA | N   | 113-ASN | O   |
| 14 | 3.09   | 2-ABA | CA  | 83-GLY  | O   |
| 15 | 3.08   | 2-ABA | C   | 83-GLY  | O   |
| 16 | 3.74   | 2-ABA | O   | 83-GLY  | O   |
| 17 | 3.74   | 2-ABA | O   | 114-LYS | CB  |
| 18 | 3.58   | 2-ABA | O   | 114-LYS | CD  |
| 19 | 3.48   | 2-ABA | CB  | 83-GLY  | O   |
| 20 | 3.96   | 2-ABA | CB  | 122-GLN | CD  |
| 21 | 3.40   | 2-ABA | CB  | 122-GLN | NE2 |
| 22 | 3.74   | 2-ABA | CG  | 112-ALA | C   |
| 23 | 3.91   | 2-ABA | CG  | 112-ALA | O   |
| 24 | 3.92   | 2-ABA | CG  | 112-ALA | CB  |
| 25 | 3.61   | 2-ABA | CG  | 113-ASN | N   |
| 26 | 3.65   | 2-ABA | CG  | 113-ASN | CA  |
| 27 | 3.75   | 2-ABA | CG  | 113-ASN | C   |
| 28 | 3.61   | 2-ABA | CG  | 113-ASN | O   |
| 29 | 3.79   | 2-ABA | CG  | 122-GLN | CD  |
| 30 | 3.97   | 2-ABA | CG  | 122-GLN | OE1 |
| 31 | 3.71   | 2-ABA | CG  | 122-GLN | NE2 |
| 32 | 3.13 * | 3-SAR | N   | 83-GLY  | O   |
| 33 | 4.00   | 3-SAR | CA  | 83-GLY  | O   |
| 34 | 3.26   | 3-SAR | CN  | 83-GLY  | O   |
| 35 | 3.90   | 5-VAL | CG1 | 66-ARG  | NE  |
| 36 | 3.67   | 9-MLE | CA  | 71-PHE  | CE2 |
| 37 | 3.96   | 9-MLE | CB  | 71-PHE  | CD2 |
| 38 | 3.74   | 9-MLE | CB  | 71-PHE  | CE2 |
| 39 | 3.89   | 9-MLE | CB  | 71-PHE  | CZ  |
| 40 | 3.79   | 9-MLE | CB  | 132-HIS | NE2 |
| 41 | 3.90   | 9-MLE | CD2 | 68-ILE  | CG2 |
| 42 | 3.96   | 9-MLE | CD2 | 71-PHE  | CG  |
| 43 | 3.79   | 9-MLE | CD2 | 71-PHE  | CD2 |

|    |        |        |     |         |     |
|----|--------|--------|-----|---------|-----|
| 44 | 3.49   | 9-MLE  | C   | 71-PHE  | CE2 |
| 45 | 3.61   | 9-MLE  | C   | 71-PHE  | CZ  |
| 46 | 3.86   | 9-MLE  | C   | 132-HIS | NE2 |
| 47 | 3.62   | 9-MLE  | O   | 71-PHE  | CE2 |
| 48 | 3.26   | 9-MLE  | O   | 71-PHE  | CZ  |
| 49 | 3.58   | 9-MLE  | O   | 132-HIS | CD2 |
| 50 | 3.75   | 9-MLE  | O   | 132-HIS | CE1 |
| 51 | 2.73 * | 9-MLE  | O   | 132-HIS | NE2 |
| 52 | 3.94   | 10-MLE | N   | 71-PHE  | CE2 |
| 53 | 3.41   | 10-MLE | CN  | 66-ARG  | NH2 |
| 54 | 3.96   | 10-MLE | C   | 66-ARG  | NH1 |
| 55 | 3.85   | 10-MLE | C   | 66-ARG  | NH2 |
| 56 | 3.15   | 10-MLE | O   | 66-ARG  | CZ  |
| 57 | 2.87   | 10-MLE | O   | 66-ARG  | NH1 |
| 58 | 2.66 * | 10-MLE | O   | 66-ARG  | NH2 |
| 59 | 3.82   | 11-MVA | CN  | 133-LEU | CD2 |
| 60 | 3.86   | 11-MVA | CN  | 137-HIS | CE1 |
| 61 | 3.27   | 11-MVA | CN  | 137-HIS | NE2 |
| 62 | 3.77   | 11-MVA | CA  | 66-ARG  | NH1 |
| 63 | 3.96   | 11-MVA | CB  | 124-PHE | CD1 |
| 64 | 3.36   | 11-MVA | CG1 | 74-GLN  | CD  |
| 65 | 3.46   | 11-MVA | CG1 | 74-GLN  | OE1 |
| 66 | 3.36   | 11-MVA | CG1 | 74-GLN  | NE2 |
| 67 | 3.54   | 11-MVA | CG1 | 112-ALA | CB  |
| 68 | 3.84   | 11-MVA | CG1 | 124-PHE | CB  |
| 69 | 3.78   | 11-MVA | CG1 | 124-PHE | CG  |
| 70 | 3.60   | 11-MVA | CG1 | 124-PHE | CD1 |
| 71 | 3.80   | 11-MVA | CG2 | 71-PHE  | CZ  |
| 72 | 3.77   | 11-MVA | CG2 | 72-MET  | CG  |
| 73 | 3.76   | 11-MVA | CG2 | 72-MET  | SD  |
| 74 | 3.89   | 11-MVA | CG2 | 124-PHE | CG  |
| 75 | 3.83   | 11-MVA | CG2 | 124-PHE | CD2 |

<.....> Number of potential hydrogen bonds 4

| AA-residue-### | Contacts |
|----------------|----------|
| BMT----- 1     | 10       |
| ABA----- 2     | 21       |
| SAR----- 3     | 4        |
| VAL----- 5     | 2        |
| MLE----- 9     | 17       |
| MLE----- 10    | 8        |
| MVA----- 11    | 18       |

>>>> Inter-molecular distances 75 Below 4-A 75

>>> Hydrophobic 28 Hydrophilic 7 Mixed 40

>> Main-chain/Main-chain 9 Side-chain/Side-chain 29 Mixed 37

**This is step \* \* \* 17 \* \* \***

\* \* \* The PDB coordinates file-name /users/andrzej/musca/cypx/2Z6W.pdb  
Chain identifier (sequence) >>> |M|  
Number of residues in IDRES(\*) 11  
Starting from the index IDRES 1  
Number of effective XYZ-coordinates 84

\* \* \* The PDB coordinates file-name /users/andrzej/musca/cypx/2Z6W.pdb  
Chain identifier (sequence) >>> |A|  
Number of residues in IDRES(\*) 164  
Starting from the index IDRES 2

Number of effective XYZ-coordinates 1239

Number of used coordinates 84 1239

|    |        |        |     |         |     |
|----|--------|--------|-----|---------|-----|
| 1  | 3.59   | 1-BMT  | CN  | 55-ARG  | NH1 |
| 2  | 2.95   | 1-BMT  | CA  | 102-ASN | O   |
| 3  | 3.36   | 1-BMT  | C   | 102-ASN | O   |
| 4  | 3.12 * | 1-BMT  | O   | 63-GLN  | NE2 |
| 5  | 3.30   | 1-BMT  | CB  | 102-ASN | O   |
| 6  | 3.91   | 1-BMT  | CG2 | 102-ASN | O   |
| 7  | 3.31   | 1-BMT  | CD1 | 102-ASN | O   |
| 8  | 3.64   | 1-BMT  | CD1 | 102-ASN | OD1 |
| 9  | 3.85   | 1-BMT  | CH  | 103-ALA | C   |
| 10 | 3.66   | 1-BMT  | CH  | 103-ALA | O   |
| 11 | 3.92   | 2-ABA  | N   | 102-ASN | C   |
| 12 | 2.93 * | 2-ABA  | N   | 102-ASN | O   |
| 13 | 3.13   | 2-ABA  | CA  | 72-GLY  | O   |
| 14 | 3.90   | 2-ABA  | CA  | 102-ASN | O   |
| 15 | 3.00   | 2-ABA  | C   | 72-GLY  | O   |
| 16 | 3.62   | 2-ABA  | O   | 72-GLY  | O   |
| 17 | 3.82   | 2-ABA  | O   | 103-ALA | CB  |
| 18 | 3.69   | 2-ABA  | CB  | 72-GLY  | O   |
| 19 | 3.71   | 2-ABA  | CB  | 102-ASN | O   |
| 20 | 3.57   | 2-ABA  | CB  | 111-GLN | NE2 |
| 21 | 3.93   | 2-ABA  | CG  | 101-ALA | C   |
| 22 | 3.59   | 2-ABA  | CG  | 101-ALA | CB  |
| 23 | 3.68   | 2-ABA  | CG  | 102-ASN | N   |
| 24 | 3.92   | 2-ABA  | CG  | 102-ASN | CA  |
| 25 | 3.90   | 2-ABA  | CG  | 102-ASN | C   |
| 26 | 3.59   | 2-ABA  | CG  | 102-ASN | O   |
| 27 | 3.89   | 2-ABA  | CG  | 111-GLN | CB  |
| 28 | 3.62   | 2-ABA  | CG  | 111-GLN | CD  |
| 29 | 3.74   | 2-ABA  | CG  | 111-GLN | OE1 |
| 30 | 3.56   | 2-ABA  | CG  | 111-GLN | NE2 |
| 31 | 3.07 * | 3-SAR  | N   | 72-GLY  | O   |
| 32 | 3.82   | 3-SAR  | CA  | 72-GLY  | O   |
| 33 | 3.98   | 3-SAR  | CN  | 72-GLY  | C   |
| 34 | 3.21   | 3-SAR  | CN  | 72-GLY  | O   |
| 35 | 3.84   | 5-VAL  | CG1 | 55-ARG  | NE  |
| 36 | 3.78   | 5-VAL  | CG1 | 55-ARG  | NH2 |
| 37 | 3.76   | 9-MLE  | CA  | 60-PHE  | CE2 |
| 38 | 3.91   | 9-MLE  | CA  | 60-PHE  | CZ  |
| 39 | 3.85   | 9-MLE  | CB  | 60-PHE  | CE2 |
| 40 | 3.83   | 9-MLE  | CB  | 60-PHE  | CZ  |
| 41 | 3.99   | 9-MLE  | CB  | 121-TRP | NE1 |
| 42 | 3.84   | 9-MLE  | CB  | 121-TRP | CZ2 |
| 43 | 3.92   | 9-MLE  | CD1 | 121-TRP | CZ2 |
| 44 | 3.83   | 9-MLE  | CD2 | 60-PHE  | CD2 |
| 45 | 3.53   | 9-MLE  | C   | 60-PHE  | CE2 |
| 46 | 3.30   | 9-MLE  | C   | 60-PHE  | CZ  |
| 47 | 3.70   | 9-MLE  | O   | 60-PHE  | CE1 |
| 48 | 3.83   | 9-MLE  | O   | 60-PHE  | CE2 |
| 49 | 3.13   | 9-MLE  | O   | 60-PHE  | CZ  |
| 50 | 3.78   | 9-MLE  | O   | 121-TRP | CD1 |
| 51 | 2.87 * | 9-MLE  | O   | 121-TRP | NE1 |
| 52 | 3.87   | 9-MLE  | O   | 121-TRP | CE2 |
| 53 | 3.81   | 10-MLE | N   | 60-PHE  | CE2 |
| 54 | 3.75   | 10-MLE | N   | 60-PHE  | CZ  |
| 55 | 3.59   | 10-MLE | CN  | 55-ARG  | NH2 |
| 56 | 3.88   | 10-MLE | C   | 60-PHE  | CZ  |
| 57 | 3.39   | 10-MLE | O   | 55-ARG  | CZ  |
| 58 | 2.93   | 10-MLE | O   | 55-ARG  | NH1 |
| 59 | 2.95 * | 10-MLE | O   | 55-ARG  | NH2 |

|    |      |        |     |         |     |
|----|------|--------|-----|---------|-----|
| 60 | 3.49 | 10-MLE | O   | 60-PHE  | CE2 |
| 61 | 3.67 | 10-MLE | O   | 60-PHE  | CZ  |
| 62 | 3.83 | 11-MVA | CN  | 122-LEU | CD2 |
| 63 | 3.46 | 11-MVA | CN  | 126-HIS | CE1 |
| 64 | 3.27 | 11-MVA | CN  | 126-HIS | NE2 |
| 65 | 3.83 | 11-MVA | CA  | 55-ARG  | NH1 |
| 66 | 3.80 | 11-MVA | CB  | 113-PHE | CD1 |
| 67 | 3.90 | 11-MVA | CB  | 113-PHE | CE1 |
| 68 | 3.91 | 11-MVA | CG1 | 63-GLN  | CG  |
| 69 | 3.45 | 11-MVA | CG1 | 63-GLN  | CD  |
| 70 | 3.37 | 11-MVA | CG1 | 63-GLN  | OE1 |
| 71 | 3.82 | 11-MVA | CG1 | 63-GLN  | NE2 |
| 72 | 3.78 | 11-MVA | CG1 | 101-ALA | CB  |
| 73 | 3.88 | 11-MVA | CG1 | 113-PHE | CG  |
| 74 | 3.55 | 11-MVA | CG1 | 113-PHE | CD1 |
| 75 | 3.67 | 11-MVA | CG2 | 60-PHE  | CZ  |
| 76 | 3.87 | 11-MVA | CG2 | 61-MET  | CG  |
| 77 | 3.87 | 11-MVA | CG2 | 113-PHE | CG  |
| 78 | 3.86 | 11-MVA | CG2 | 113-PHE | CD1 |
| 79 | 3.90 | 11-MVA | CG2 | 113-PHE | CD2 |
| 80 | 3.90 | 11-MVA | CG2 | 113-PHE | CE1 |
| 81 | 3.92 | 11-MVA | CG2 | 113-PHE | CE2 |
| 82 | 3.91 | 11-MVA | CG2 | 113-PHE | CZ  |

<.....> Number of potential hydrogen bonds 5

| AA-residue-### | Contacts |
|----------------|----------|
| BMT----- 1     | 9        |
| ABA----- 2     | 21       |
| SAR----- 3     | 5        |
| VAL----- 5     | 3        |
| MLE----- 9     | 17       |
| MLE----- 10    | 10       |
| MVA----- 11    | 22       |

>>>> Inter-molecular distances 82 Below 4-A 82

>>> Hydrophobic 31 Hydrophilic 7 Mixed 44

>> Main-chain/Main-chain 10 Side-chain/Side-chain 32 Mixed 40

**This is step \* \* \* 18 \* \* \***

\* \* \* The PDB coordinates file-name /users/andrzej/musca/cypx/1M9C.pdb  
Chain identifier (sequence) >>> |A|  
Number of residues in IDRES(\*) 165  
Starting from the index IDRES 1  
Number of effective XYZ-coordinates 1265

\* \* \* The PDB coordinates file-name /users/andrzej/musca/cypx/1M9C.pdb  
Chain identifier (sequence) >>> |D|  
Number of residues in IDRES(\*) 136  
Starting from the index IDRES 11  
Number of effective XYZ-coordinates 1058

Number of used coordinates 1265 1058

|   |      |        |     |        |    |
|---|------|--------|-----|--------|----|
| 1 | 3.21 | 55-ARG | CZ  | 90-PRO | O  |
| 2 | 3.97 | 55-ARG | NH1 | 89-GLY | CA |
| 3 | 3.93 | 55-ARG | NH1 | 89-GLY | C  |
| 4 | 3.73 | 55-ARG | NH1 | 90-PRO | N  |
| 5 | 3.81 | 55-ARG | NH1 | 90-PRO | C  |

|    |      |        |         |        |        |     |
|----|------|--------|---------|--------|--------|-----|
| 6  | 2.69 | 55-ARG | NH1     | 90-PRO | O      |     |
| 7  | 3.50 | 55-ARG | NH1     | 90-PRO | CD     |     |
| 8  | 2.89 | *      | 55-ARG  | NH2    | 90-PRO | O   |
| 9  | 3.69 |        | 55-ARG  | NH2    | 95-GLN | CD  |
| 10 | 2.94 | *      | 55-ARG  | NH2    | 95-GLN | OE1 |
| 11 | 3.88 |        | 55-ARG  | NH2    | 95-GLN | NE2 |
| 12 | 3.82 |        | 60-PHE  | CD2    | 92-ALA | CA  |
| 13 | 3.28 |        | 60-PHE  | CD2    | 92-ALA | CB  |
| 14 | 3.90 |        | 60-PHE  | CE2    | 90-PRO | O   |
| 15 | 3.79 |        | 60-PHE  | CE2    | 91-ILE | C   |
| 16 | 3.80 |        | 60-PHE  | CE2    | 91-ILE | O   |
| 17 | 3.61 |        | 60-PHE  | CE2    | 92-ALA | N   |
| 18 | 3.35 |        | 60-PHE  | CE2    | 92-ALA | CA  |
| 19 | 3.30 |        | 60-PHE  | CE2    | 92-ALA | CB  |
| 20 | 3.93 |        | 60-PHE  | CZ     | 90-PRO | CB  |
| 21 | 3.87 |        | 60-PHE  | CZ     | 90-PRO | CG  |
| 22 | 3.70 |        | 60-PHE  | CZ     | 91-ILE | C   |
| 23 | 3.30 |        | 60-PHE  | CZ     | 91-ILE | O   |
| 24 | 3.92 |        | 60-PHE  | CZ     | 92-ALA | N   |
| 25 | 3.66 |        | 60-PHE  | CZ     | 92-ALA | CA  |
| 26 | 3.99 |        | 61-MET  | SD     | 90-PRO | CG  |
| 27 | 3.92 |        | 63-GLN  | CD     | 88-ALA | O   |
| 28 | 3.83 |        | 63-GLN  | CD     | 89-GLY | CA  |
| 29 | 3.41 |        | 63-GLN  | OE1    | 89-GLY | CA  |
| 30 | 3.58 |        | 63-GLN  | OE1    | 90-PRO | CD  |
| 31 | 3.53 |        | 63-GLN  | NE2    | 88-ALA | C   |
| 32 | 2.97 | *      | 63-GLN  | NE2    | 88-ALA | O   |
| 33 | 3.86 |        | 63-GLN  | NE2    | 89-GLY | N   |
| 34 | 3.69 |        | 63-GLN  | NE2    | 89-GLY | CA  |
| 35 | 3.48 |        | 71-ASN  | O      | 87-HIS | ND1 |
| 36 | 3.75 |        | 72-GLY  | C      | 88-ALA | N   |
| 37 | 3.70 |        | 72-GLY  | O      | 87-HIS | CA  |
| 38 | 3.68 |        | 72-GLY  | O      | 87-HIS | C   |
| 39 | 2.76 | *      | 72-GLY  | O      | 88-ALA | N   |
| 40 | 3.69 |        | 72-GLY  | O      | 88-ALA | CA  |
| 41 | 3.51 |        | 72-GLY  | O      | 88-ALA | CB  |
| 42 | 3.98 |        | 73-THR  | CG2    | 86-VAL | O   |
| 43 | 3.61 |        | 73-THR  | CG2    | 87-HIS | ND1 |
| 44 | 3.57 |        | 73-THR  | CG2    | 87-HIS | CE1 |
| 45 | 3.93 |        | 101-ALA | CB     | 89-GLY | CA  |
| 46 | 3.79 |        | 102-ASN | C      | 88-ALA | CB  |
| 47 | 3.46 |        | 102-ASN | O      | 88-ALA | CA  |
| 48 | 3.74 |        | 102-ASN | O      | 88-ALA | C   |
| 49 | 3.64 |        | 102-ASN | O      | 88-ALA | CB  |
| 50 | 3.01 | *      | 102-ASN | O      | 89-GLY | N   |
| 51 | 3.88 |        | 102-ASN | O      | 89-GLY | CA  |
| 52 | 3.92 |        | 102-ASN | O      | 89-GLY | O   |
| 53 | 3.67 |        | 103-ALA | CB     | 86-VAL | CG1 |
| 54 | 3.83 |        | 111-GLN | CD     | 88-ALA | CB  |
| 55 | 3.88 |        | 111-GLN | OE1    | 88-ALA | CB  |
| 56 | 3.61 |        | 111-GLN | NE2    | 88-ALA | CB  |
| 57 | 3.91 |        | 113-PHE | CD1    | 90-PRO | CG  |
| 58 | 3.77 |        | 113-PHE | CD1    | 90-PRO | CD  |
| 59 | 3.97 |        | 113-PHE | CD2    | 90-PRO | CG  |
| 60 | 3.80 |        | 113-PHE | CE1    | 90-PRO | CG  |
| 61 | 3.91 |        | 113-PHE | CE1    | 90-PRO | CD  |
| 62 | 3.96 |        | 113-PHE | CE2    | 90-PRO | CG  |
| 63 | 3.95 |        | 113-PHE | CZ     | 90-PRO | CB  |
| 64 | 3.80 |        | 113-PHE | CZ     | 90-PRO | CG  |
| 65 | 3.56 |        | 121-TRP | NE1    | 91-ILE | O   |
| 66 | 3.95 |        | 121-TRP | NE1    | 93-PRO | CD  |
| 67 | 3.89 |        | 121-TRP | CE2    | 93-PRO | CG  |
| 68 | 3.82 |        | 121-TRP | CE2    | 93-PRO | CD  |



|    |      |         |     |        |    |
|----|------|---------|-----|--------|----|
| 69 | 3.35 | 121-TRP | CZ2 | 93-PRO | CG |
| 70 | 3.29 | 121-TRP | CZ2 | 93-PRO | CD |
| 71 | 3.78 | 121-TRP | CH2 | 93-PRO | CG |
| 72 | 3.64 | 122-LEU | CD1 | 90-PRO | CB |
| 73 | 3.82 | 122-LEU | CD2 | 90-PRO | CB |
| 74 | 3.86 | 126-HIS | CE1 | 90-PRO | N  |
| 75 | 3.73 | 126-HIS | CE1 | 90-PRO | CA |
| 76 | 3.82 | 126-HIS | CE1 | 90-PRO | CB |
| 77 | 3.82 | 126-HIS | NE2 | 90-PRO | CA |
| 78 | 3.76 | 126-HIS | NE2 | 90-PRO | CB |

<.....> Number of potential hydrogen bonds 5

| AA-residue-### | Contacts |
|----------------|----------|
| ARG----- 55    | 10       |
| PHE----- 60    | 15       |
| MET----- 61    | 2        |
| GLN----- 63    | 9        |
| ASN----- 71    | 2        |
| GLY----- 72    | 7        |
| THR----- 73    | 4        |
| ALA-----101    | 2        |
| ASN-----102    | 8        |
| ALA-----103    | 2        |
| GLN-----111    | 4        |
| PHE-----113    | 9        |
| TRP-----121    | 8        |
| LEU-----122    | 3        |
| HIS-----126    | 6        |

>>>> Inter-molecular distances 78 Below 4-A 78

>>> Hydrophobic 33 Hydrophilic 12 Mixed 33

>> Main-chain/Main-chain 10 Side-chain/Side-chain 34 Mixed 34
