# Supplementary material
Source: PubMed Central journal article supplement (PMC11115621)

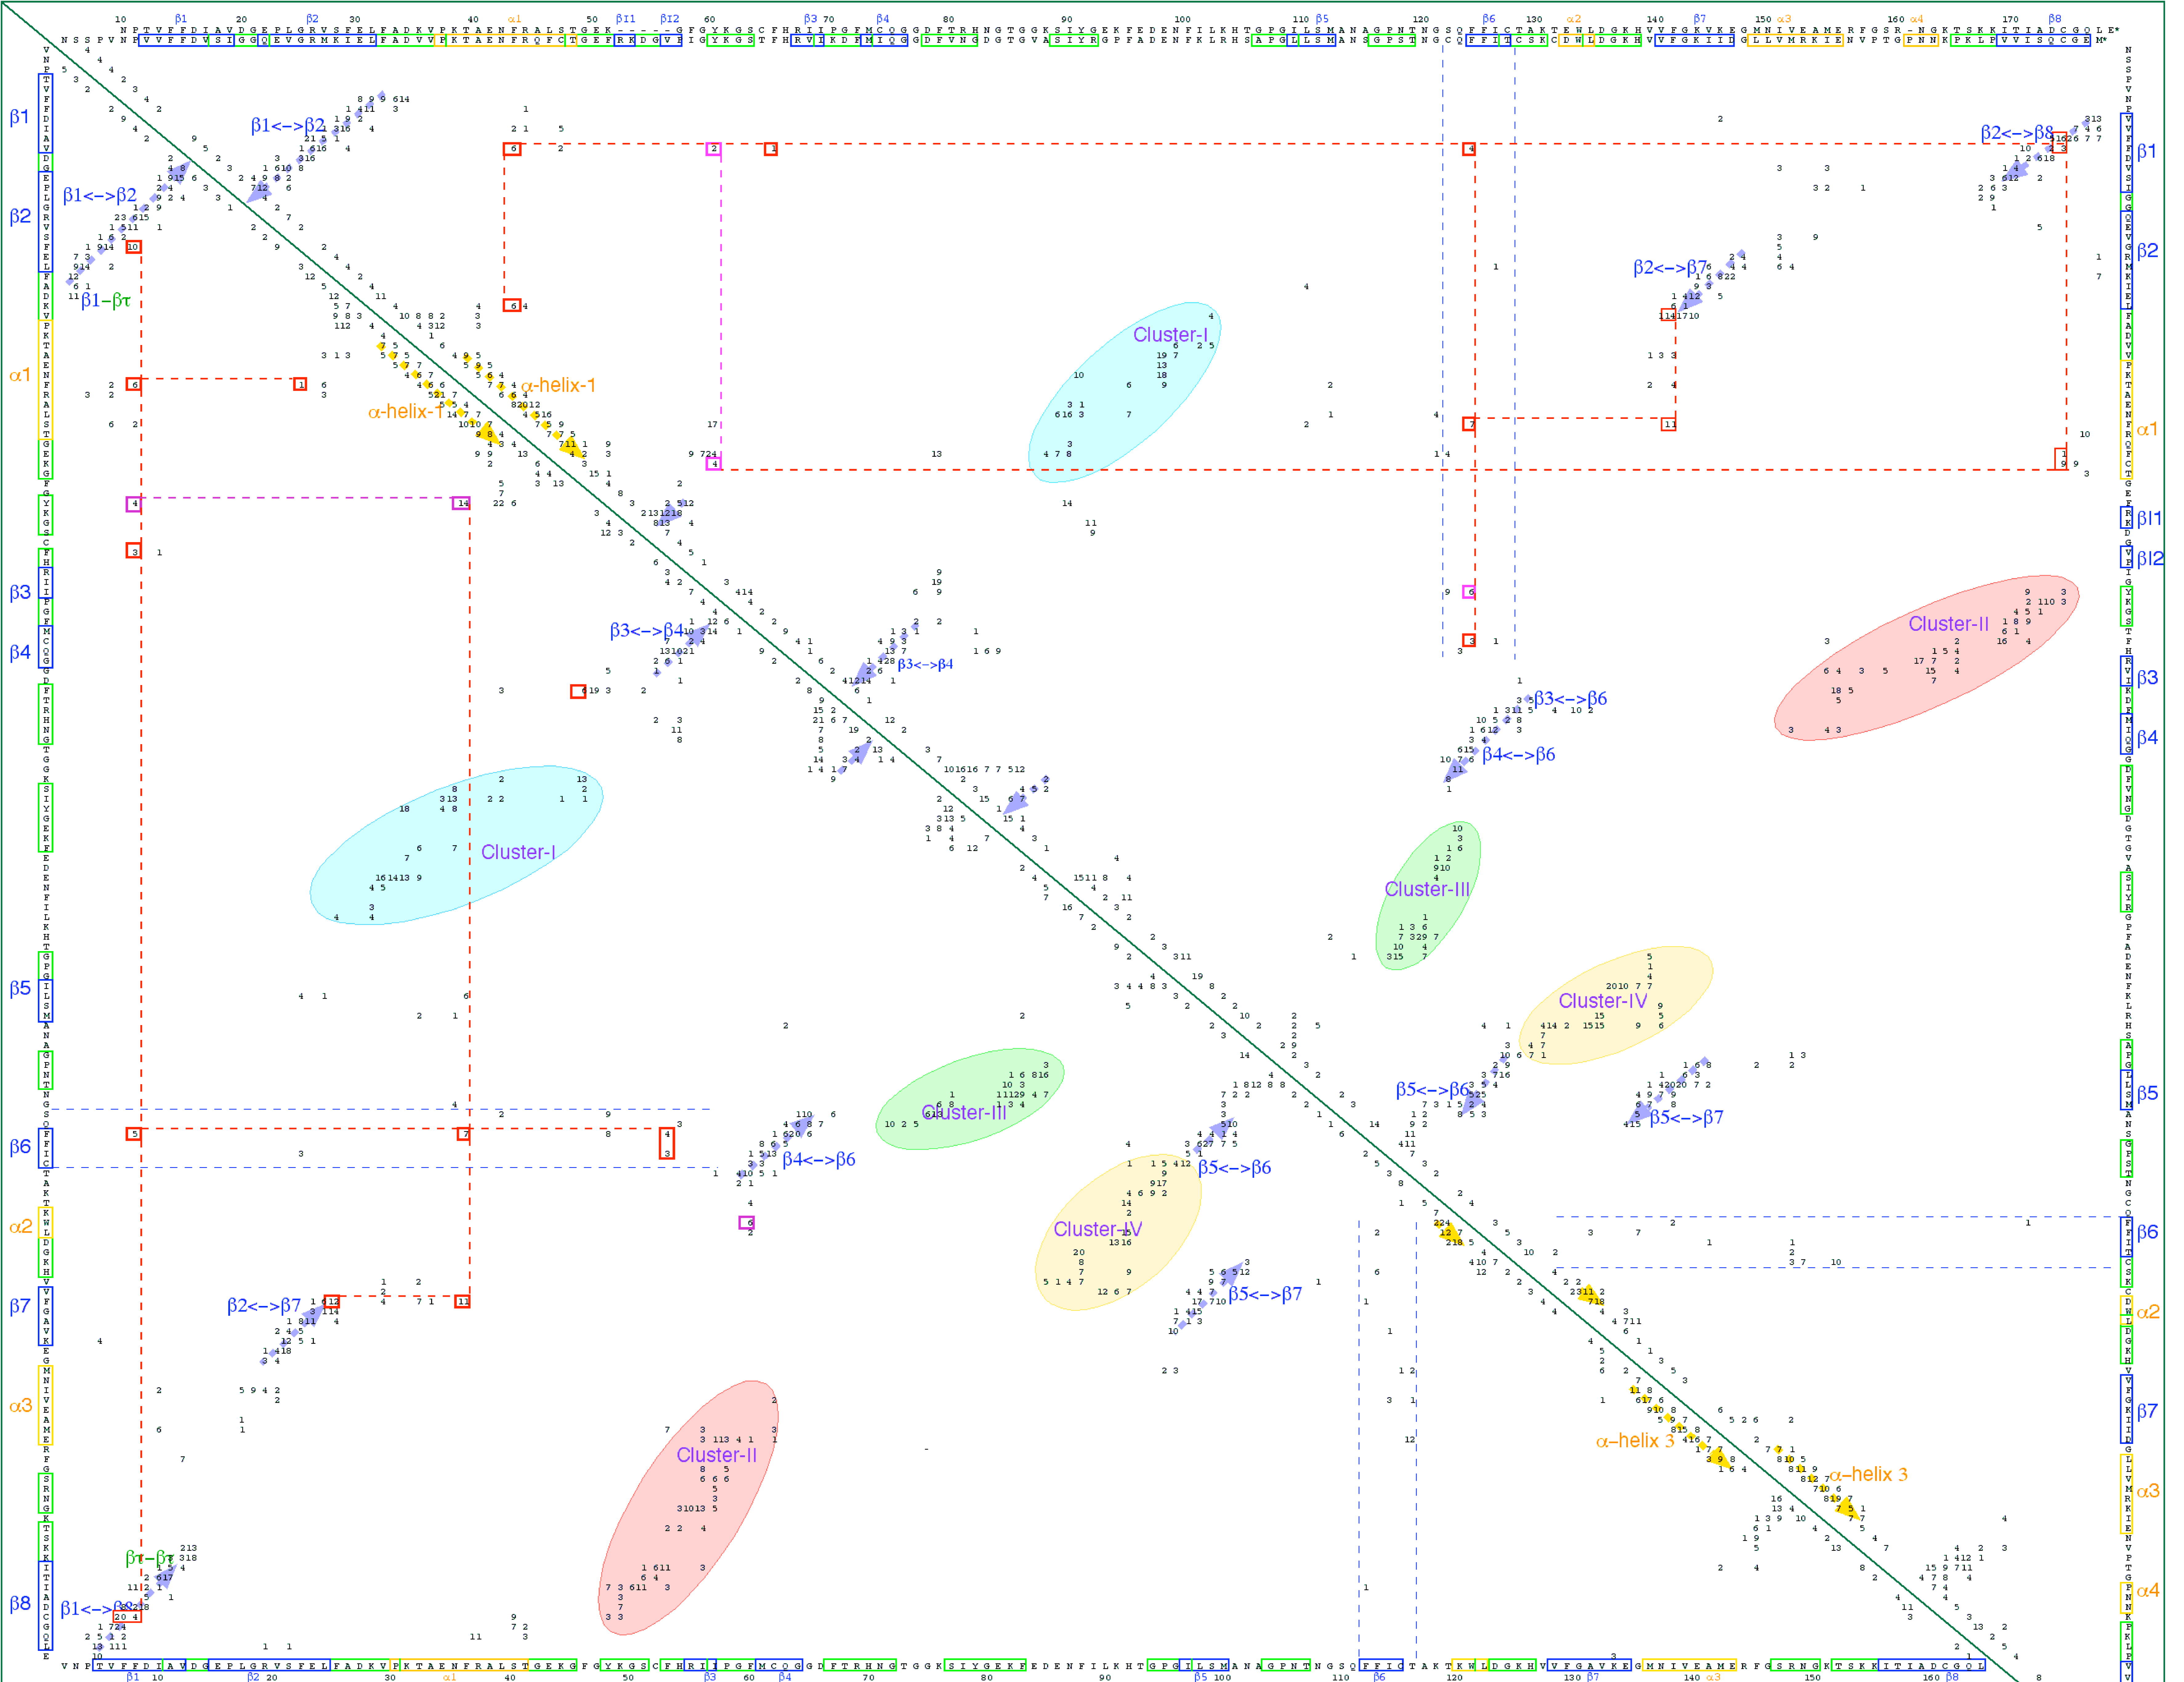

$\beta$ -structure    $\alpha$ -helix    $\beta$ -turn

Supplement: 18_2010_437_MOESM5_ESM.pdf [file 18_2010_437_MOESM5_ESM.pdf]
